22 **Abstract:**

23 *Plasmodium falciparum* malaria results in immunoregulatory responses across multiple cell  
24 subsets, which protects the individual from inflammatory mediated immunopathogenesis.  
25 However, these anti-inflammatory responses also hamper the development of effective anti-  
26 parasitic immunity. Understanding malaria induced tolerogenic responses in specific cell subsets  
27 may inform the development of strategies to boost protective immunity during drug treatment  
28 and vaccination. Here, we analysed the immune landscape with single cell RNA sequencing of  
29 peripheral blood mononuclear cells during falciparum malaria and at convalescence in children  
30 and adults from a low malaria transmission area in Malaysia. To understand malaria driven  
31 changes specific to each immune cell subset, we interrogated transcriptional changes in sub-  
32 clustered major immune cell types during infection. We found that malaria drove development of  
33 immunosuppressive monocytes, alongside NK and  $\gamma\delta$  T cells which regulated inflammatory  
34 function but maintained cytolytic capacity. IL10-producing CD4 T cells and IL10-producing  
35 regulatory B cells were also induced. Type I interferon responses were identified across all cell  
36 types, linking Type I interferon signalling with the induction of immunoregulatory networks  
37 during malaria. Together, these findings provide insights into cell-specific and shared  
38 immunoregulatory changes induced during malaria, and provides a data set resource for  
39 additional analysis of anti-parasitic immunity and disease pathogenesis.

40

41

## 42 INTRODUCTION

43 *Plasmodium falciparum* causes significant disease burden globally, with >240 million cases of  
44 malaria and >600 000 deaths reported in 2020 (1). In areas of high malaria transmission, anti-  
45 disease or tolerogenic immunity develops relatively rapidly, with children rarely experiencing  
46 recurrence of severe malaria (2). However, anti-parasitic immunity and protection from mild  
47 diseases develops more slowly, with children experiencing multiple patent infections throughout  
48 childhood before developing levels of protection that control parasite growth to sub-patent  
49 levels. These phenomena are thought to be linked, with the slow acquisition of anti-parasitic  
50 immunity attributed to tolerogenic responses across multiple cell subsets required for robust  
51 adaptive immune development. These tolerogenic mechanisms may also contribute to reduced  
52 malaria vaccine efficacy in exposed populations. As such, a better understanding of tolerogenic  
53 immune responses during infection may inform the development of more effective vaccine  
54 strategies for areas of high malaria endemicity.

55 Malaria driven tolerogenic and immunoregulatory responses allow parasite persistence by  
56 evading and disrupting anti-parasitic mechanisms employed by both innate and adaptive immune  
57 cells. Multiple studies have shown that monocytes and dendritic cells (DCs), that are initiators of  
58 the immune responses, are tolerized during malaria. During experimental human malaria and  
59 natural infection, monocytes and DCs have reduced responsiveness to toll-like receptor (TLR)  
60 stimulation and antigen presentation is suppressed (3–6). Increased IL-10 production (7) and  
61 higher frequencies of monocytes with a regulatory phenotype are also detected in children and  
62 adults from malaria endemic areas (8, 9). Tolerogenic phenotypes have also been reported in  
63 other innate cells. For example, natural killer (NK) cells expressing the regulatory marker PD1,  
64 are expanded in populations in malaria endemic areas (10). Additionally, gamma-delta ( $\gamma\delta$ ) T

65 cells, particularly V $\delta$ 2<sup>+</sup> subsets which are important innate inflammatory responders to malaria  
66 parasites, become tolerized in children in high transmission settings (11, 12). Immunoregulation  
67 also exists in adaptive cell responses to malaria. Within the CD4 T cell compartment, type 1  
68 regulatory (Tr1) cells that co-produce IFN $\gamma$  and IL10 during malaria, dominate antigen-specific  
69 CD4 T cell responses in children in high endemic areas (13–15). These Tr1 cells develop rapidly  
70 during a primary malaria infection in previously naive adults (16). CD4 T cells also upregulate a  
71 number of additional inhibitory pathways during malaria infection, including expression of co-  
72 inhibitory receptors and production of TGF $\beta$  (17–19). Within the B cell compartment, multiple  
73 studies have shown that ‘atypical’ memory B cells expand in response to malaria (20–22). These  
74 cells have reduced functional capacity compared to ‘typical’ memory B cells (23, 24), and an  
75 immunoregulatory role for these cells in malaria is also possible. Malaria responsive regulatory  
76 B cells (Bregs), which produce IL10, have been reported in mouse models(25), but have not been  
77 identified in human malaria. While the drivers of tolerogenic cell responses are incompletely  
78 understood, Type I IFN signalling is key to the emergence of Tr1 CD4 T cells during malaria  
79 (16), and is recognised as both an activating and regulatory driver of the malaria immune  
80 response (26).

81         Transcriptional changes associated with immune cell tolerance have been reported in  
82 limited studies. For example, monocytes from Malian children and adults following parasite  
83 stimulation *in vitro* had reduced induction of *NFKBI* (positive regulator of inflammation) in  
84 tolerized adult cells (8), and transcriptional analysis of V $\delta$ 2<sup>+</sup>  $\gamma\delta$  T cells in Ugandan children  
85 identified upregulation of multiple immunoregulatory pathways in highly exposed children (11).  
86 Additionally, a large whole-blood transcriptomic study revealed the upregulation of  
87 interferon responses, and that p53 activation in monocytes attenuated *Plasmodium*-induced

88 inflammation and predicted protection from fever (27). However, to date, no studies have  
89 comprehensively investigated transcriptional signatures of malaria-driven tolerance across all  
90 cell subsets in the same individuals during infection.

91 The advent of single-cell RNA sequencing (scRNAseq) has allowed comprehensive  
92 analysis of distinct immune cell subsets during human infection, and identification of key  
93 changes driven by infection. For example, in HIV, scRNAseq revealed previously under-  
94 appreciated differentiation of proinflammatory T cells, prolonged monocyte major  
95 histocompatibility complex II (MHC II) upregulation, and NK cell cytolytic killing (28).  
96 Additionally, throughout the SARS-CoV-2 pandemic, rapid application of scRNAseq platforms  
97 provided important comprehensive understanding of cell type specific responses to both mild and  
98 severe infections, as well as similarities and differences to other diseases (29–31). To date, while  
99 scRNAseq has been applied to the malaria parasites (32–34), no comprehensive scRNAseq  
100 mapping of the immune landscape during malaria infection has been undertaken. In the present  
101 study, we applied scRNAseq to peripheral blood mononuclear cells (PBMCs) from patients  
102 during acute falciparum malaria and post treatment. Tolerogenic responses during acute infection  
103 were identified across multiple immune cell subsets, with key transcriptional changes confirmed  
104 at the protein level in additional patients. Together this study advances our understanding of the  
105 regulatory immune landscape during malaria and provides opportunities to manipulate these  
106 pathways for clinical advantage.

107

## 108 **RESULTS**

### 109 **Altered immune cell profiles during acute malaria infection**

110 To undertake a global analysis of the immune response during malaria infection, we performed  
111 droplet-based scRNAseq on peripheral blood mononuclear cells (PBMCs) from 6 individuals  
112 (age 6-24 years) with uncomplicated *P. falciparum* malaria at hospital presentation (day 0) and at  
113 7 and 28 days after drug treatment, along with 2 healthy adult endemic controls (ages 20 and 27  
114 years) (**Fig. 1A, Table S1**). We sequenced a total of 115 526 cells, with 106 076 cells passing  
115 quality control (QC; minimum of 220 genes expressed and <20% mitochondrial reads per cell).  
116 Due to a 10X Chromium wetting error, no quality cells were retained from one individual at the  
117 acute infection time point (ID child 1). Data were integrated to harmonize data sets across batch,  
118 donor and infection timepoints, and cell clusters visualized with uniform manifold approximation  
119 and projection (UMAP). Expression of canonical and lineage marker genes were used to  
120 annotate cell clusters into 15 high level cell states: CD14<sup>+</sup> classical monocytes, CD16<sup>+</sup> non-  
121 classical monocytes, classical dendritic cells (cDCs), plasmacytoid dendritic cells (pDCs), CD4  
122 T cells, CD8 T cells,  $\gamma\delta$  T cells, NKT cells, B cells, plasma cells, proliferating cells [which  
123 appeared to be of mixed cell types], hematopoietic stem and progenitor cells (HSPCs), platelets,  
124 and one unidentified cluster (**Fig. 1B/C, Table S2**). The relative proportions of these cell clusters  
125 correlated strongly with the proportions of cells identified by flow cytometry analysis of the  
126 same cell samples ( $R=0.95$ ,  $p<0.001$ , **Fig. 1D, Fig. S1**). During malaria infection, there were  
127 marked changes to the distribution of cell types, with relative increases in CD4 T cells and  
128 proliferating cells, and marked decreases in NK cells and  $\gamma\delta$  T cells (**Fig. 1E**). To characterize  
129 gene expression profiles during malaria infection, we performed differential gene expression  
130 analysis within each cell subset between acute infection (day 0), 7 and 28 days after treatment.  
131 (**Fig. 1F**). We observed the largest number of differentially expressed genes (DEGs) when  
132 comparing between day 0 and day 28, with monocytes and classical dendritic cells (cDCs)

133 exhibiting the highest transcriptional changes relative to other cell types (**Fig. 1F, Tables S3A-**  
134 **C**). Large numbers of DEGs were also detected between day 0 and day 7, with a large proportion  
135 of these also detected 28-days post-treatment for each subset (for example, majority of DEGs for  
136 day 0 compared to day 7 and day 0 compared to day 28, were shared for CD14<sup>+</sup> classical  
137 monocytes [64%], CD16<sup>+</sup> non-classical monocytes [60%], cDCs [53%] and pDCs [47%]). As  
138 such, we focused subsequent analysis on DEGs identified between day 0 (acute malaria) and day  
139 28 post treatment.

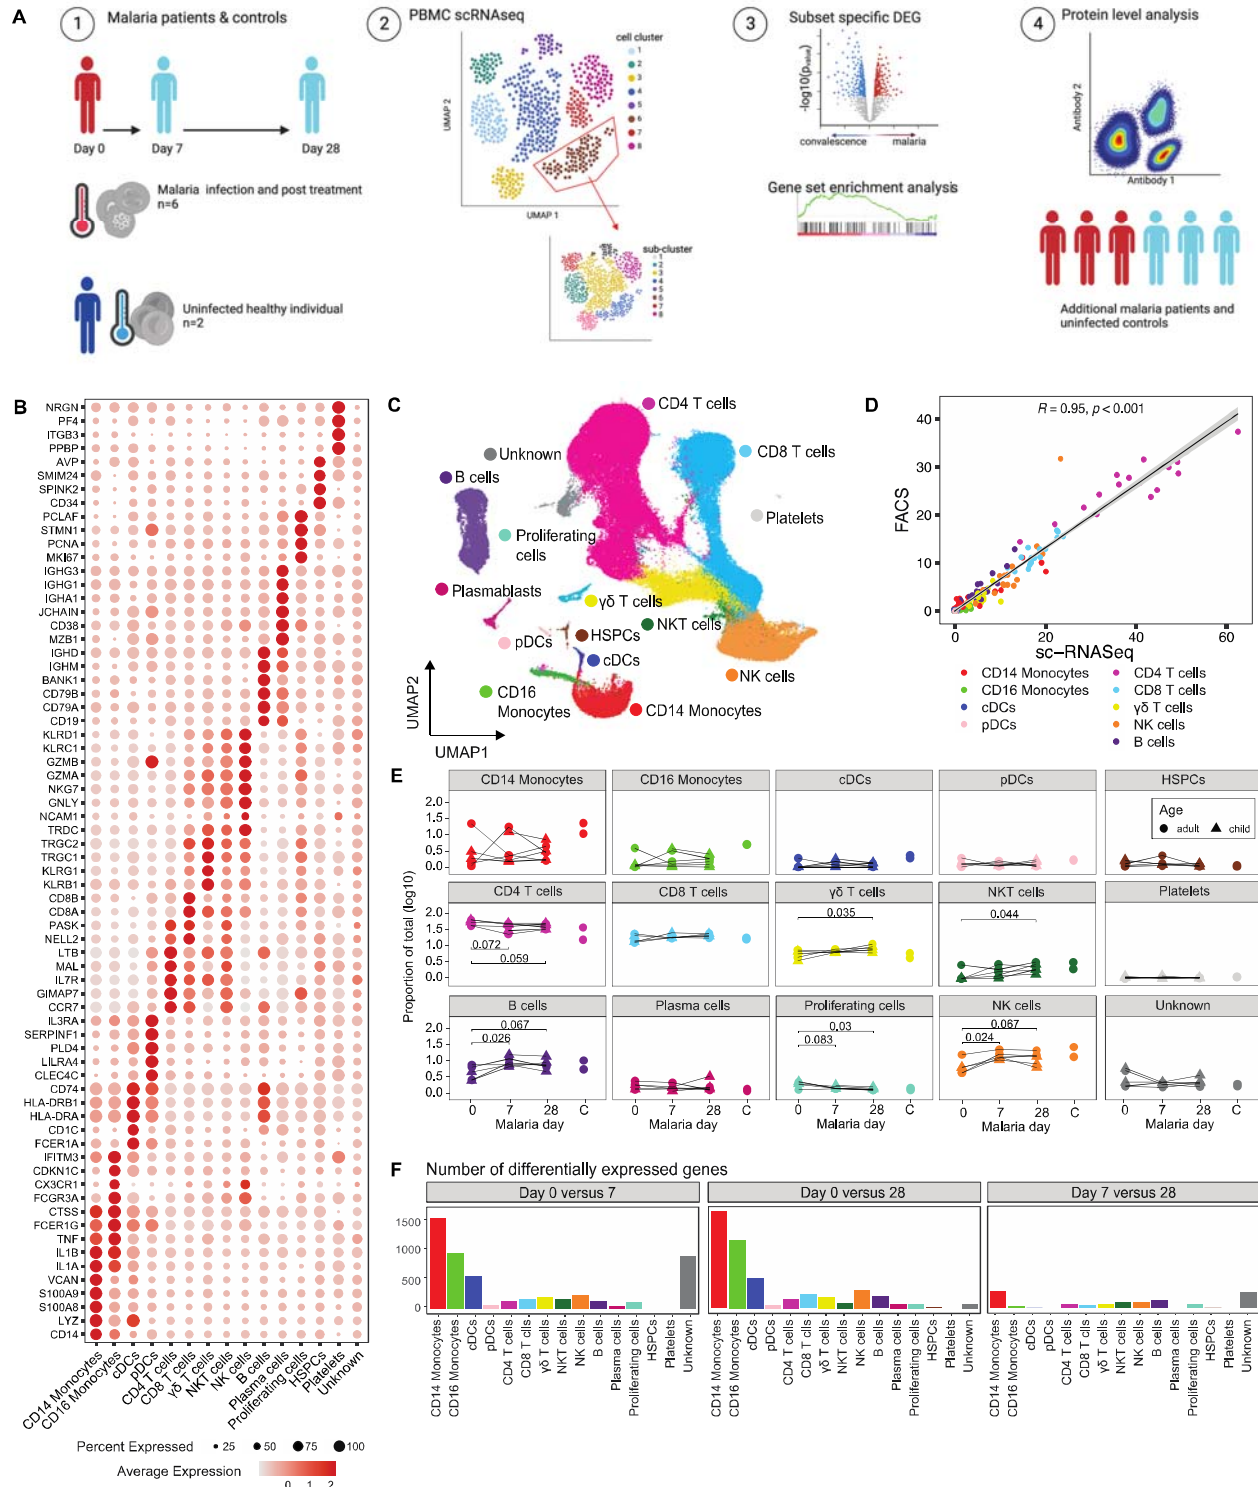

140 **Fig. 1. Single cell transcriptional landscape of malaria infection.** (A) A schematic outline  
 141 depicting workflow for sample collection and scRNAseq analysis. PBMCs were collected from  
 142 falciparum malaria patients at day 0, and at day 7 and 28 post treatment ( $n = 6$ ) and from malaria  
 143 uninfected healthy controls ( $n = 2$ ). Live PBMCs were analysed by 3' 10X Chromium single cell  
 144 sequencing, and cell types identified. For each cell type and sub-cluster, genes with differential  
 145 expression between days were identified and analysed. Key findings were confirmed at the



146 protein level in additional patients. **(B)** Dot plot of the mean expression of marker genes used to  
147 annotate cell types. **(C)** UMAP of all cells in integrated analysis. Cells are coloured by cell  
148 subtypes. **(D)** Correlation between relative proportion of cells identified by scRNAseq and flow  
149 cytometry analysis. Pearson's R and p is indicated. **(E)** Relative proportion of identified subsets  
150 from scRNAseq analysis at day 0 during malaria, and day 7, and 28 days post-treatment, and in  
151 healthy uninfected control individuals. P-value is calculated by Mann Whitney U test between  
152 day 0 and subsequent time points. **(F)** Number of DEGs for each cell type between day 0/7, day  
153 0/28 and day 7/28. See also Fig. S1 and Tables S1 to S3.

154

## 155 **Shared and subset-specific immunosuppressive signatures in monocytes and cDCs during** 156 **malaria**

157 We first analysed transcriptional changes to innate myeloid cells from day 0 to day 28 and  
158 identified 1674, 1182, 521 DEGs in CD14 classical monocytes, CD16 non-classical monocytes  
159 and cDCs, respectively (**Table S3B**). The high transcriptional activity of monocytes and cDCs  
160 during malaria was in contrast to the low number of DEGs detected in pDCs ( $n=60$ ). Of pDC  
161 DEGs, 23% were associated with the long non-coding RNA family and 15% were histone genes  
162 (Table S3B). Low transcriptional activation of pDCs is consistent with our previous bulk-RNA  
163 sequencing analysis of isolated pDCs during experimental malaria infection, which showed that  
164 pDCs were transcriptionally stable during infection (35). Transcriptional changes during malaria  
165 in both monocyte subsets and cDCs were both shared and cell type specific (**Fig. 2A**). Both  
166 CD14<sup>+</sup> and CD16<sup>+</sup> monocytes were activated, with marked upregulation of innate cell activation  
167 genes such as *TOLL-LIKE RECEPTORS (TLRs)*, *DISINTEGRIN* and *METALLOPEPTIDASE*  
168 *DOMAIN (ADAM9 and ADAM10)* proteins(36), as well as alarmins, *S100A8* and *S100A9*, which  
169 are typically upregulated in monocytes under inflammatory conditions (37). In contrast, MHC  
170 class II HLA-DR genes were down-regulated in both CD14 and CD16 monocytes (**Fig. 2B**,  
171 Table S3B). High expression of *S100A8/A9*, along with *RETN*, *ALOX5AP* and reduced  
172 expression of MHC class II HLA-DR genes has recently been used to define immunosuppressive

173 MS1 monocytes in sepsis (38) and proportional increases in these immune-suppressive  
174 monocytes has been detected in both sepsis and COVID-19 (30). Consistent with an enrichment  
175 of immunosuppressive monocytes during malaria infection, a number of inflammatory cytokines  
176 including *TNF*, *IL1 $\alpha$* , *IL1 $\beta$* , *IL6*, *IL18* were markedly reduced at day 0, compared with 28 days  
177 post treatment (**Fig. 2B, Table S3B**). There was also reduced expression of multiple chemokine  
178 genes including *CCL2* (encoding MCP-1), *CCL3*, *CCL4*, *CCL5*, *CCL7*, *CXCL8* (encoding IL8),  
179 *CXCL2*, *CXCL3*, *CCL20*, *CXCL1* and *CXCL16* in both monocyte subsets, with a greater  
180 magnitude of reduction in CD14 monocytes. Consistent with reduced expression of these  
181 cytokine and chemokine genes, we also observed reduced expression of NK- $\kappa$ B family members,  
182 *NF- $\kappa$ B1*, *NF- $\kappa$ B2*, and *REL*, central transcriptional factors for pro-inflammatory gene induction  
183 (39). Immune-suppressive phenotypes were also detected in cDCs during infection, with notable  
184 down-regulation of HLA-DR genes *HLA-DRA* and *HLA-DRB1* along with multiple paralogues  
185 (*HLA-DPA1/B1* and *HLA-DQA1/B1*) in cDCs but not cytokine/chemokine genes. The reduction  
186 of HLA-DR genes in cDCs is consistent with previous reports showing reduced HLA-DR  
187 expression at the protein level on DCs during experimental (3), and naturally acquired malaria  
188 (5, 40, 41).

189 In contrast to down-regulation of inflammatory gene signatures, multiple genes involved  
190 in pathogen recognition, scavenging and phagocytosis were upregulated in both monocyte  
191 subsets and cDCs during acute infection, including *CD163* and *FCGR1A* (encoding  
192 CD64/Fc $\gamma$ RI) which we have previously shown to be upregulated at the protein level on both  
193 classical and non-classical monocytes during malaria (4) (**Fig. 2B**). Similarly, *FCAR* (encoding  
194 the Fc fragment of IgA receptor) was also upregulated on both monocyte subsets and cDCs,  
195 consistent with a possible role of IgA targeting antibodies in immunity against malaria (42–44).

196 *CD93* and *FCGR2A* (encoding CD32/Fc $\gamma$ RIIa) which mediate the enhancement of phagocytosis  
197 in monocytes and macrophages were upregulated during infection on CD16 monocytes and  
198 cDCs, but not CD14 monocytes. *COMPLEMENT RECEPTOR 1 (CRI)*, a membrane immune  
199 adherence receptor that plays a critical role in the capture and clearance of complement-  
200 opsonized pathogens including by erythrocytes and monocytes/macrophages, was upregulated on  
201 both CD14<sup>+</sup> and CD16<sup>+</sup> monocytes and cDCs during malaria. This transcriptional upregulation  
202 of *CRI* is in contrast to previous reports of down regulated CR1 on splenic  
203 monocytes/macrophages in murine models of malaria, and on CD16<sup>+</sup> monocytes/macrophages in  
204 *P. falciparum* and *P. vivax* malaria patients from Peru(45). CD36, involved in antibody  
205 independent phagocytosis was also upregulated on both subsets and cDCs.

206 To further investigate shared and cell type specific transcriptional changes, DEGs were  
207 analysed using the Gene Set Enrichment Analysis (GSEA) and overrepresented upstream  
208 regulators identified. These analyses revealed both shared and cell specific gene signature  
209 enrichment and regulators (**Fig. 2C-D**). Consistent with DEGs for each subset, both monocyte  
210 subsets and cDCs were enriched for pathways such as secretion, phagocytosis, myeloid  
211 leukocyte mediated immunity and immune effector processes during malaria. In contrast,  
212 multiple subset specific pathways were also identified. For example, leukocyte migration and  
213 chemotaxis, inflammatory and defence response, and cytokine production were enriched at day 0  
214 during malaria in CD16 monocytes and cDCs, but enriched at day 28 in CD14 monocytes. In  
215 contrast, pathways associated with antigen presentation were consistently enriched only in  
216 CD16<sup>+</sup> monocytes during malaria. In agreement with cell type specific pathway enrichment,  
217 analysis of upstream regulators identified motifs that were shared between CD14<sup>+</sup> and CD16<sup>+</sup>  
218 monocytes including NF $\kappa$ B-p5, IRF2, STAT5 and Jun-AP1-binding *cis*-elements, but also

219 regulators that were specific for each subset. For CD16 monocytes, this included p53, STAT1,  
220 IRF1, and IRF8-binding *cis*-elements. p53 was previously identified in bulk transcriptional  
221 analysis as an important contributor of innate cell responses and immunity to malaria (27). The  
222 enrichment of IRF1/8/2 and STAT1/5 are consistent with a key role of Type I IFN pathways in  
223 both activation and regulation of innate immune cell responses in malaria(26).

224 To assess some of these key findings at the protein level, *ex vivo* secretion of  
225 cytokine/chemokines TNF, IL1 $\beta$ , IL6 and MCP1 (*CCL2*) from CD14<sup>+</sup> monocytes, CD16<sup>+</sup>  
226 monocytes and cDCs were measured in additional falciparum malaria patients from the same  
227 study site at day 0 and day 28 ( $n=8$ ) (**Fig. 2E, Fig. S2**). Consistent with transcriptional findings,  
228 the majority of individuals had reduced inflammatory cytokine/chemokine secretion in CD14<sup>+</sup>  
229 monocytes at day 0 compared to day 28. This reduction was significant at the population level  
230 for MCP1 (**Fig. 2F**). MCP1 expression was also reduced at day 0 compared to day 28 in cDCs.  
231 To measure the co-expression of cytokines, responses were analysed by SPICE (Simplified  
232 presentation of incredibly complex evaluations(46)). Overall, the composition of cytokine  
233 expression in CD14<sup>+</sup> monocytes at day 0 was significantly different to expression at day 28 (**Fig.**  
234 **2G**). Collectively, data reveal a significant enrichment of regulatory innate cells during malaria  
235 infection which down-regulate multiple cytokine and chemokine responses along with HLA-DR  
236 associated genes and pathways required for robust inflammatory control and antigen presentation  
237 in a cell subset specific manner, regulated by cell subset specific pathways. In contrast, multiple  
238 receptors involved in antibody mediated functions are upregulated, consistent with a potential  
239 role of innate cells in antibody mediated parasite clearance during infection.

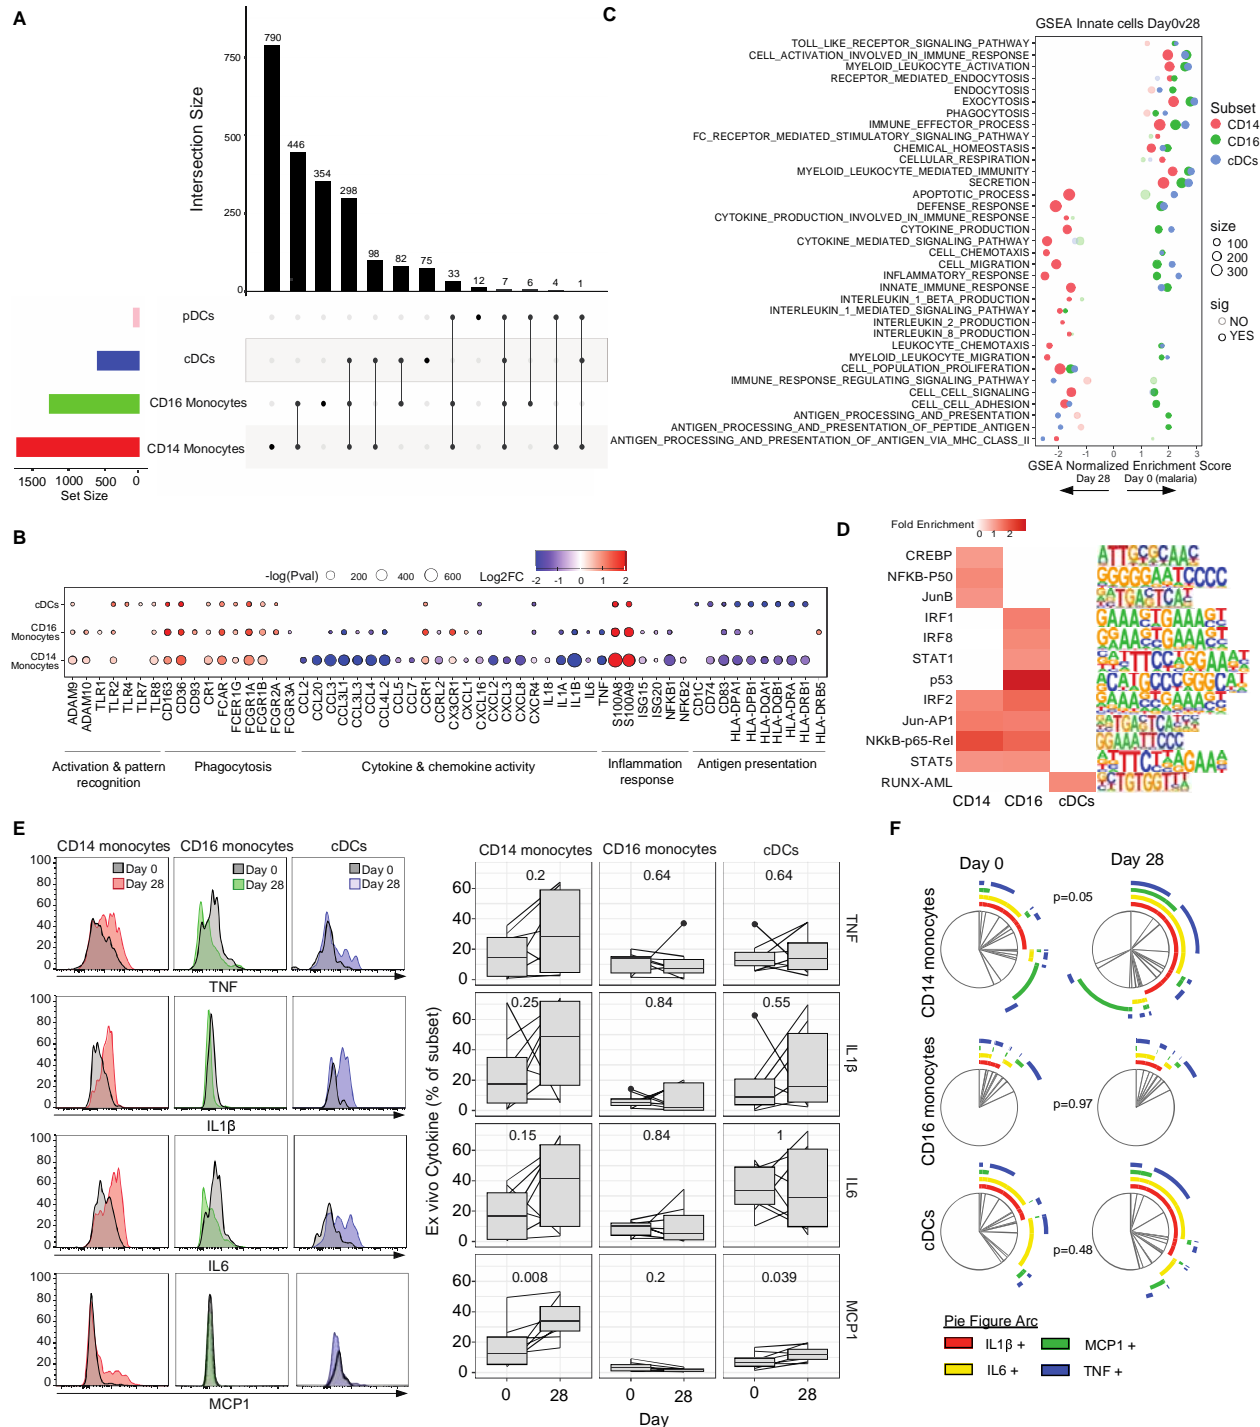

240 **Fig. 2. Immuno-suppressive signatures of innate cells during malaria.** DEGs in CD14 and  
 241 CD16 monocytes, and cDCs and pDCs were at day 0 compared to day 28 were identified. (A)  
 242 Upset plot of shared and subset specific DEGs of each subset identified between day 0 and day  
 243 28. (B) DEGs of interest in monocytes and cDCs. Genes with known monocyte function are  
 244 indicated. (C) GSEA of DEGs in CD14 and CD16 monocytes and cDCs. (D) Common and  
 245 unique upstream regulators of DEGs in CD14 and CD16 monocytes and cDCs. (E) *Ex vivo*  
 246 secretion of TNF, IL1 $\beta$ , IL6 and MCP1 was measured in CD14 and CD16 monocytes, and cDCs.

247 Left panel – representative cytokine expression of a single individual at day 0 compared to day  
248 28 in each subset. Right panel – population level expression of cytokine expression ( $n=8$  day 0,  
249  $n=8$  day 28). P-value indicated is calculated by Wilcoxon signed rank test. (F) Co-expression of  
250 cytokines in each subset was analysed by SPICE. Expression graphed as Pie-figures. P-value  
251 indicated is calculated by Permutation test. See also Fig. S2 and Table S3.  
252

### 253 **Subset-specific activation and regulation of NK cells during malaria**

254 Along with innate myeloid cells, NK cells are important early responders to *Plasmodium*  
255 infection, and have roles in adaptive immunity as effector cells. Broadly, NK cells exist in  
256 multiple distinct functional subsets along a spectrum of least differentiated CD56 bright cells,  
257 towards highly differentiated CD57<sup>+</sup> senescent cells. CD56 bright NK cells and other less  
258 differentiated subsets produce IFN $\gamma$  following parasite stimulation *in vitro* (47, 48) and during  
259 controlled human malaria infection (49). In contrast, adaptive and highly differentiated NK cells  
260 expand in malaria exposed individuals, and function via antibody dependent cellular cytotoxicity  
261 (ADCC) to protect from malaria (50, 51).

262 To investigate the transcriptional activation of these phenotypically distinct NK cell  
263 populations during malaria, we first undertook unbiased sub-clustering of NK cells identified in  
264 PBMCs (Fig. 1). Clustering identified five subsets which were annotated based on cluster  
265 markers as CD56 bright, Transitional, IFN $\gamma$ <sup>+</sup> Adaptive, IFN $\gamma$  Adaptive and PD1<sup>+</sup> NK cell  
266 subsets (Fig. 3A, Table S4). CD56 bright cells expressed the highest levels of *NCAMI*  
267 (encoding CD56), *SELL*, *KLRF1*, *GZMK* and *IL7R*. The Adaptive cell subset had increased  
268 expression of *NKG7*, *GZMB* and *FCGR3A* (encoding CD16). Transitional NK cells expressed  
269 markers from both CD56 bright and Adaptive subsets, consistent with previous scRNAseq  
270 analysis (52, 53)(Fig. 3B). Within the Adaptive cell subset, two clusters were further identified,  
271 differentiated as IFN $\gamma$ <sup>+</sup> and IFN $\gamma$  Adaptive subsets based on *IFNG* expression, along with *TNF*,  
272 *CCL3* and *CCL4*. Additionally, we identified a NK cell cluster expressing high levels of *PDCDI*

273 (encoding PD1). PD1<sup>+</sup> NK cells have previously been shown to expand with age in malaria  
274 endemic populations and have increased function in ADCC (10). PD1<sup>+</sup> NK cells also had  
275 increased expression of *VCAMI*, *ITGAD* (encoding CD11d), *TOX*, *TNFRSF1B* (encoding  
276 TNFR2) and *CD160* (**Fig. 3B**). During malaria, there was a significant increase in the proportion  
277 of IFN $\gamma$ <sup>+</sup> Adaptive cells, consistent with an increased inflammatory and cytokine responsiveness  
278 of Adaptive NK cells during infection. Additionally, there was a proportional decrease in PD1<sup>+</sup>  
279 NK cells during acute infection compared to 7 days following treatment (**Fig. 3C**). This  
280 decreased proportion of PD1<sup>+</sup> NK cells during acute malaria is in contrast to previous reports of  
281 the expansion of this subset identified by flow-cytometry in Malians with falciparum malaria  
282 (10).

283 To investigate malaria-driven transcriptional changes to NK cells, we identified DEGs  
284 comparing day 0 to day 28 within each subset. Transitional, IFN $\gamma$ <sup>-</sup> Adaptive and PD1<sup>+</sup> subsets  
285 were more transcriptionally active during malaria compared to CD56 bright and IFN $\gamma$ <sup>+</sup> Adaptive  
286 subsets (**Fig. 3D, Table S5**). PD1<sup>+</sup>, Transitional and IFN $\gamma$ <sup>-</sup> Adaptive NK cells, had a large  
287 proportion of subset specific DEGs, suggesting unique NK cell subset specific activation  
288 pathways during malaria (subset specific DEGs 76%, 42% and 47% respectively, **Fig. 3D**).  
289 During acute malaria, there was evidence for increased cytotoxic potential across multiple NK  
290 cell subsets, with upregulation of genes with known cytotoxic functions (Granzyme members  
291 *GZMB*, *GZMA*, *GZMK* (54), Granulysin [*GNL1*], Perforin [*PRF1*]) and roles in degranulation  
292 and NK cell activation (*CD44* (55), *CCL4L2* (56), *STX11* [encoding Syntaxin 11 (57)],  
293 *CD8A*(58), *LGALS1* [encoding Galectin 1 (59)], *XCL1*, *SLC7A5* [encoding CD98/LAT1 (60)]  
294 and *SELL* [encoding CD62L (61)]) (**Fig. 3E**). GSEA confirmed upregulation of multiple  
295 pathways associated with cell function, particularly within Transitional, IFN $\gamma$ <sup>-</sup> Adaptive and

296 IFN $\gamma$ <sup>+</sup> Adaptive subsets (**Fig. S3**). In PD1<sup>+</sup> NK cells, there was also evidence for subset specific  
297 upregulation of the MAPK pathway (increased *MAPKAPK2* and *MAP2K2*). Additionally, PD1<sup>+</sup>  
298 NK cells had a large increase in *ITGAX* (encoding CD11c) expression during acute infection,  
299 with smaller increases in *ITGAX* in CD56 Bright and Transitional NK cells. CD11c expression in  
300 NK cells is upregulated in response to inflammatory cytokines (62), and is a marker of bitypic  
301 NK cells which can produce inflammatory cytokines and also drive the proliferation of  $\gamma\delta$  T cells  
302 (63). Further, upregulation of HLA-DR genes *HLA-DQB1* and *HLA-DRB5* were also detected,  
303 with HLA-DR previously associated with NK cell activation and antigen-presentation in some  
304 settings (64).

305 Upregulation of genes mediating increased cytotoxicity and function during malaria was  
306 balanced by increases in multiple negative regulators of NK cells, including *TNFRSF4* (encoding  
307 CD134/OX40(65)), *TNFRSF9* (encoding CD137/4-1BB (66)), *TNFRSF18* (encoding  
308 CD357/GITR (67)), *LAG3* (68), *HAVCR2* (encoding Tim-3 (69)) and *CBLB* (70). GSEA showed  
309 significant enrichment of negative regulatory pathways in PD1<sup>+</sup> and IFN $\gamma$  Adaptive subsets  
310 (‘negative regulation of immune system process’ and ‘negative regulation of lymphocyte  
311 activation’)(**Fig. S3**). Across all subsets, multiple type I IFN signalling genes were upregulated  
312 including *ISG20*, *IFI16*, *IFI6*, *IFITM3*, *IRF4*, *IRF8*, and *IRF7* and GSEA confirmed upregulation  
313 of ‘response to type I IFN’ in Transitional and IFN $\gamma$  Adaptive cells (**Fig. S3**). Type I IFN  
314 signalling in NK cells has been shown to suppress IFN $\gamma$  production during viral infection (71).  
315 Taken together data suggest that Type I IFN signalling is activated in NK cells in response to  
316 malaria, which may act as a regulatory of NK cell inflammatory response during infection.

317 To investigate these key transcriptional changes to NK cells during malaria at the protein  
318 level, we analysed NK cells by flow cytometry in additional falciparum malaria patients (day 0)



319 and patients 28 days after infection. NK cells were identified as CD56 bright, Adaptive and PD1<sup>+</sup>  
320 subsets (10)(**Fig. S4A**). Within these patients, there was a slight increase in CD56 bright cells  
321 within the NK compartment during infection (**Fig. S4B**). Across all three NK subsets, there was  
322 a significant increase in Granzyme B and Perforin expression at day 0 compared to day 28 post  
323 treatment (**Fig. 3F**). In contrast, CD98 and HLA-DR expression were increased on Adaptive and  
324 PD1<sup>+</sup> NK cells, but not CD56 bright NK cells, and expression levels were much higher on PD1<sup>+</sup>  
325 cell subset. Similarly, the regulatory marker LAG-3 was increased in expression on all NK cell  
326 subsets at day 0 (at very low levels on CD56 bright cells), but Tim-3 was only increased on  
327 Adaptive and PD1<sup>+</sup> cells (**Fig. 3F**). IFN $\gamma$  and TNF expression were also assessed. While *ex vivo*  
328 IFN $\gamma$  expression was below the limit of detection for all NK cell subsets, there was a significant  
329 increase in TNF production in Adaptive, but not CD56 bright NK cells during malaria (**Fig.**  
330 **S4C**). Additionally, there was a significant increase in CD11c expression on Adaptive NK, but  
331 not CD56 bright cells (**Fig. S4D**). When considering the total profile of Granzyme B, Perforin,  
332 CD98, HLA-DR, LAG-3 and Tim-3 on the three distinct NK cell subsets, there was a significant  
333 difference in the overall composition of marker expression in each subset between day 0 and day  
334 28, indicating significant upregulation of both cytotoxic and regulatory markers during infection  
335 (**Fig. 3G**). However, PD1<sup>+</sup> NK cells are the most highly activated and regulatory during malaria  
336 due to the increased overall level of expression of these markers during acute infection,  
337 particularly CD98, HLA-DR, LAG-3 and Tim-3, compared to adaptive and CD56 bright NK  
338 cells (**Fig. 3H, Fig. S4E**)

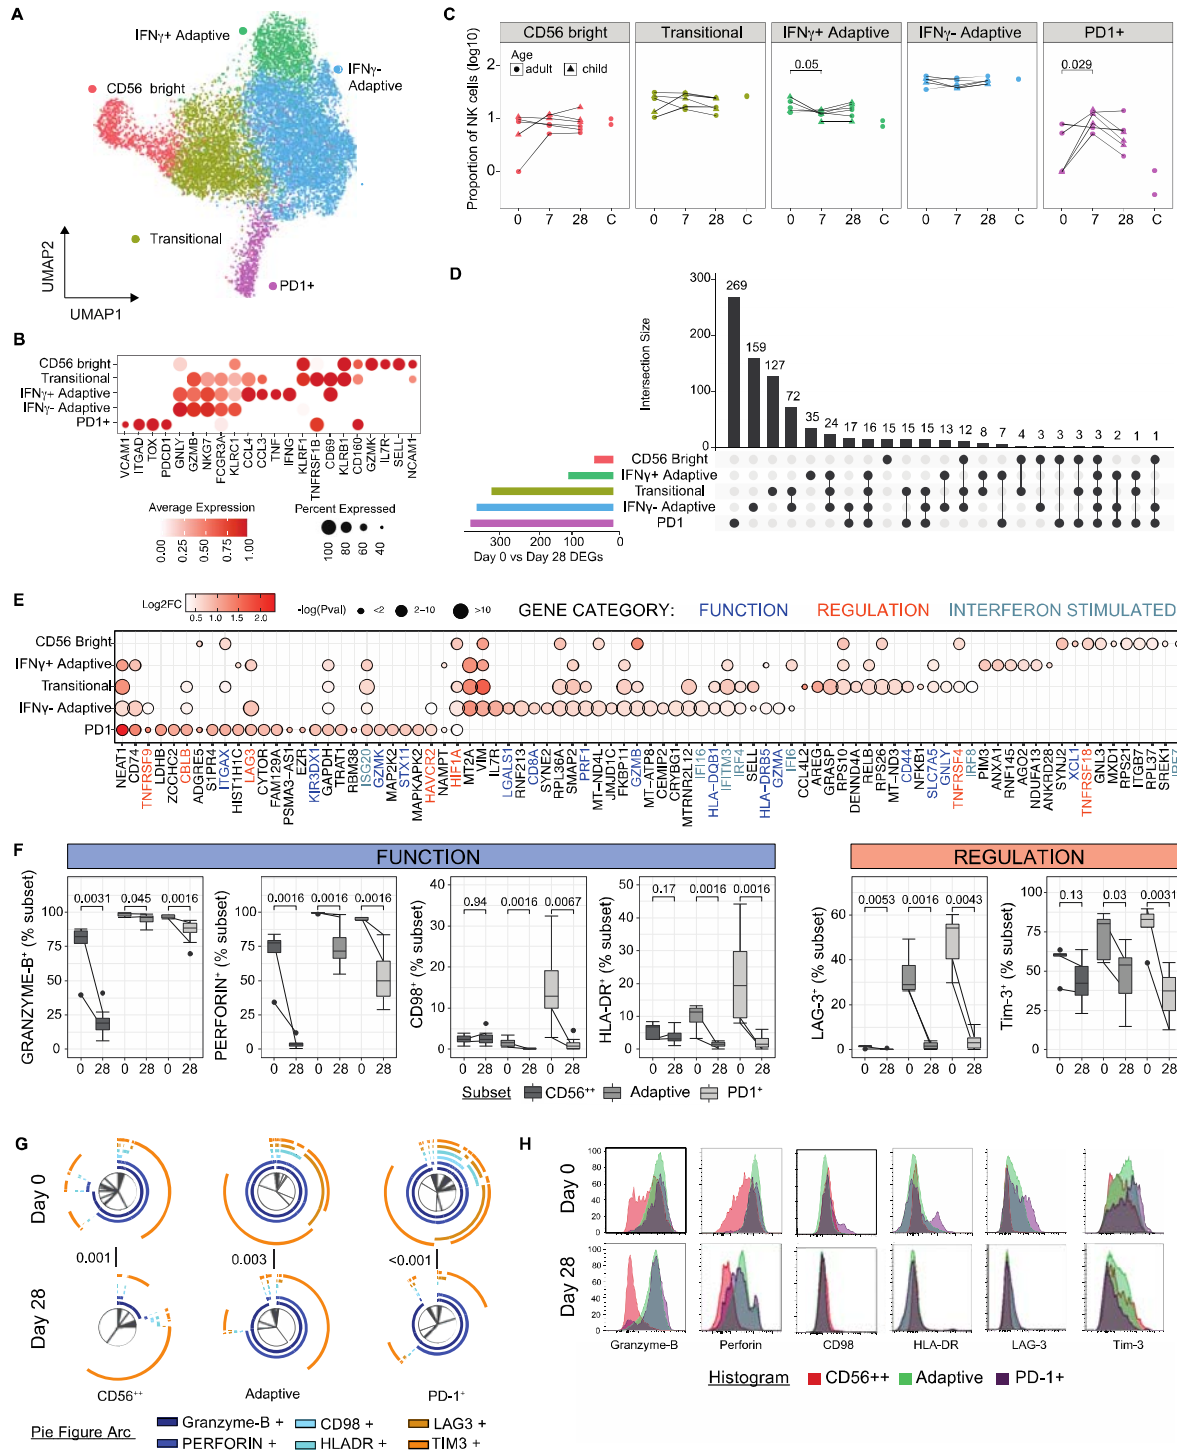

339 **Fig. 3. Subset specific activation and regulation of NK cells in malaria.** (A/B) Five subsets of  
 340 NK cells were identified based on unsupervised clustering and marker expression as CD56  
 341 bright, Transitional, IFN $\gamma$ <sup>+</sup> Adaptive, IFN $\gamma$  Adaptive and PD1<sup>+</sup> subsets. (C) Relative proportion  
 342 of identified subsets during malaria infection (day 0), 7- and 28-days post treatment, and in  
 343 healthy uninfected individuals. P-value indicated is calculated by Mann-Whitney U test between  
 344 day 0 and indicated subsequent time points (D) Upset plot of DEGs in NK cell subsets day 0  
 345 compared to day 28. The number of shared and subset specific DEGs indicated. (E) Top 20

346 DEGs of in each NK subsets, and additional genes of interest. Genes with known roles in  
347 regulation and/or function are indicated. (F) PBMCs from individuals with *P. falciparum* malaria  
348 (Day 0,  $n = 5$ , patients 28-days post-infection (Day 28,  $n = 8$ ) were analysed ex vivo to detect  
349 NK cell protein expression of identified genes by flow cytometry. Expression of proteins related  
350 to function and regulation of NK cells, shown as positive frequencies of NK cell subsets CD56  
351 bright (CD56<sup>++</sup>), Adaptive and PD1<sup>+</sup>. Box plots show the median and IQR of volunteers, lines  
352 represent paired observations, group comparisons performed by Mann-Whitney U test. (G) Co-  
353 expression of proteins related to function and regulation of NK cells analysed by SPICE. Pie  
354 graphs comparisons performed by Permutation test. (H) Histograms normalised to mode show  
355 expression of gene-related proteins within NK cell subsets of concatenated group data. See also  
356 Fig. S3-S4 and Table S4-S5.  
357

### 358 **Activation and regulation of $\gamma\delta$ T cells with diverse functions during malaria**

359  $\gamma\delta$  T cells are key innate cell responders during malaria which proliferate in response to malaria  
360 parasites and produce inflammatory cytokines with important roles in protection (72).  $\gamma\delta$  T cells  
361 can also recognize and kill parasites via lysis, and opsonic phagocytosis(73), and present antigen  
362 to activate T cells (74). However, in individuals who have had repeated malaria infections,  $\gamma\delta$  T  
363 cells become tolerized, with reduced cell frequency, inflammatory responses and increased  
364 expression of regulatory proteins (11, 75).  $\gamma\delta$  T cells in highly exposed individuals express  
365 increased CD16 and have increased cytolytic responsiveness to opsonized parasites (76). To  
366 explore these multiple roles and tolerization mechanisms of  $\gamma\delta$  T cells in the patients in this  
367 study, we sub-clustered  $\gamma\delta$  T cells identified in PBMCs (Fig. 1) and categorized 6 clusters as  
368 Cytotoxic, Inflammatory, Antigen-presenting, Transitional, Type 3 and Naive  $\gamma\delta$  T cells (Fig.  
369 4A, Table S6). Cytotoxic subset cells expressed the highest levels of *GNLY*, *GZMB*, *GZMH*,  
370 *NKG7*, *FCGR3A* (encoding CD16) and *FGFBP2*; Inflammatory subset cells expressed high  
371 levels of *CCL4L2*, *CCLA*, *CCL3*, *IFNG* and *TNF*; Antigen-presenting subset cells expressed  
372 HLA-II related genes; and Transitional  $\gamma\delta$  T cells were characterized by expression of genes that  
373 drive the early differentiation of T cells *IL21R*, *IERS5L*, *YPEL5* and *IFRD1* (Fig. 4B). We also  
374 identified Type 3-like  $\gamma\delta$  cells with high expression of *KLRB1*, *NCR3*, *RORA* and *IL7R*, and

375 Naive  $\gamma\delta$  T cells with high expression of *LTB*, *CCR7* and *AQP4*, as in previous scRNAseq data  
376 sets (77). Within  $\gamma\delta$  T cells, there was an expansion of the Cytotoxic cell subset at day 7 and 28  
377 after infection, and expansion of the Transitional cell subset at day 7 (**Fig. S5A**).

378 To investigate  $\gamma\delta$  T cell transcriptional changes during malaria, DEGs were identified in  
379  $\gamma\delta$  T cell subsets, and due to low cell numbers in subsets, also the total  $\gamma\delta$  T cell population (**Fig.**  
380 **4C-D, Table S7**). Both shared and subset specific transcriptional changes between day 0 and day  
381 28 were identified (**Fig. 4C-D**). DEGs included upregulation of inflammatory  
382 cytokines/chemokines *IFNG*, *CCL3*, *CCLA*, *CCLAL2* and genes associated with T cell activation  
383 (including *VIM*, *ICOS*, *IL7R* (encoding CD127)) across multiple subsets, consistent with the well  
384 documented inflammatory responsiveness of  $\gamma\delta$  T cell during malaria infection (72).  
385 Additionally, consistent with increased cytotoxic capacity during malaria reported previously  
386 (73), expression of cytotoxic serine protease *GZMB* was increased in both Cytotoxic and  
387 Transitional  $\gamma\delta$  T cells during malaria. Further, *CRTAM*, which drives the development of  
388 cytotoxic CD4 and CD8 T cells (78), was increased during infection, consistent with the  
389 expansion of Cytotoxic  $\gamma\delta$  T cell subsets at days 7 and 28 (**Fig. 4D**). Along with increased  
390 inflammatory and cytotoxic capacity, there was a suggestion of increased antigen presenting  
391 properties during infection, with upregulation of HLA-II related genes (*CD74*, *HLA-DPBI*, *HLA-*  
392 *DQBI*), and genes related to endocytosis and intracellular vesicle trafficking (such as *SNX9* and  
393 *SYNJ2*). Together, these data are indicative of polyfunctional  $\gamma\delta$  T cell activation during  
394 infection, consistent with previous phenotypic data (72–74).

395 Along with activation of multiple  $\gamma\delta$  T cell functions, increased expression of genes with  
396 roles in regulation and cell exhaustion were detected (**Fig. 4D**). These included upregulation of  
397 *LAG3* on Cytotoxic  $\gamma\delta$  T cells and increased expression of inflammatory regulators *OTULIN* (79)

398 and *FURIN* (80) on Inflammatory  $\gamma\delta$  T cells. Within Type 3 and Naive  $\gamma\delta$  T cells, upregulated  
399 genes included those related to inflammatory regulation (*TMSB10*; which suppresses  
400 inflammatory macrophages)(81), *HIF1A*; which controls  $\gamma\delta$  T cell mediated inflammation(82)  
401 and *BATF*; which is upregulated in exhausted CD8 T cells (83)), cell exhaustion (*PDCDI*  
402 (encoding PD1); which dampens inflammatory and cytotoxic potential of  $\gamma\delta$  T cell (84, 85),  
403 *TNFRSF4* (encoding OX40) and *HAVCR2* (encoding Tim-3); which reduces cytokine and  
404 cytotoxic potential of  $\gamma\delta$  T cells (86) and pro-apoptotic signalling (*TXNIP*). Similar to myeloid  
405 and NK cell responses, DEGs included upregulation of multiple Type I IFN response genes  
406 including *ISG20*, *IRF4*, *IRF1*, *IFITM2*, *IFI16*.  $\gamma\delta$  T cells have been reported to respond to Type I  
407 IFNs produced from poly(I:C) activated cDCs in other settings (87). However, to the best of our  
408 knowledge, a role of Type I IFNs in driving tolerogenic  $\gamma\delta$  T cells has not been explored.

409 To confirm our transcriptional findings, we assessed protein-level expression of multiple  
410 functional and regulatory markers in additional patient samples, by FACS (**Fig. S5B**). While we  
411 were unable to differentiate between V $\delta$ 2 and V $\delta$ 1  $\gamma\delta$  T cells in our 3' transcriptional data set,  
412 the large majority of circulating  $\gamma\delta$  T cell within the CD3 T cell compartment at both day 0  
413 during acute infection and day 28 post treatment were V $\delta$ 2  $\gamma\delta$  T cells (**Fig. 4E**). Within V $\delta$ 2 cells  
414  $\gamma\delta$  T cells, there was increased expression of Granzyme-B at day 0, but not in V $\delta$ 1  $\gamma\delta$  T cells as  
415 detected via FACS (**Fig. 4F**). Other functional and activation markers, Perforin, CD38, ICOS,  
416 and HLA-DR were increased on both V $\delta$ 2 and V $\delta$ 1  $\gamma\delta$  T cells during malaria. Similarly, both  
417 LAG-3 and Tim-3 were increased in expression on both subsets (**Fig. 4F**). Granzyme-B, ICOS  
418 and HLA-DR expression was higher on V $\delta$ 2 compared to V $\delta$ 1  $\gamma\delta$  T cells during malaria (**Fig.**  
419 **S5C**). To understand the expression of different functional, activation and regulatory markers on  
420 V $\delta$ 2 and V $\delta$ 1  $\gamma\delta$  T cell subsets, marker expression was analysed by SPICE. Both V $\delta$ 2 and V $\delta$ 1

421  $\gamma\delta$  T cells had high levels of co-expression of key proteins related to multiple functions and  
 422 regulation (**Fig. 4G**). The magnitude and composition of marker co-expression by  $\gamma\delta$  T cells was  
 423 increased at day 0 compared to day 28 expression. Together data shows that, as seen in myeloid  
 424 and NK cells, Type I IFN signaling is activated in  $\gamma\delta$  T cells during malaria, and  $\gamma\delta$  T increase

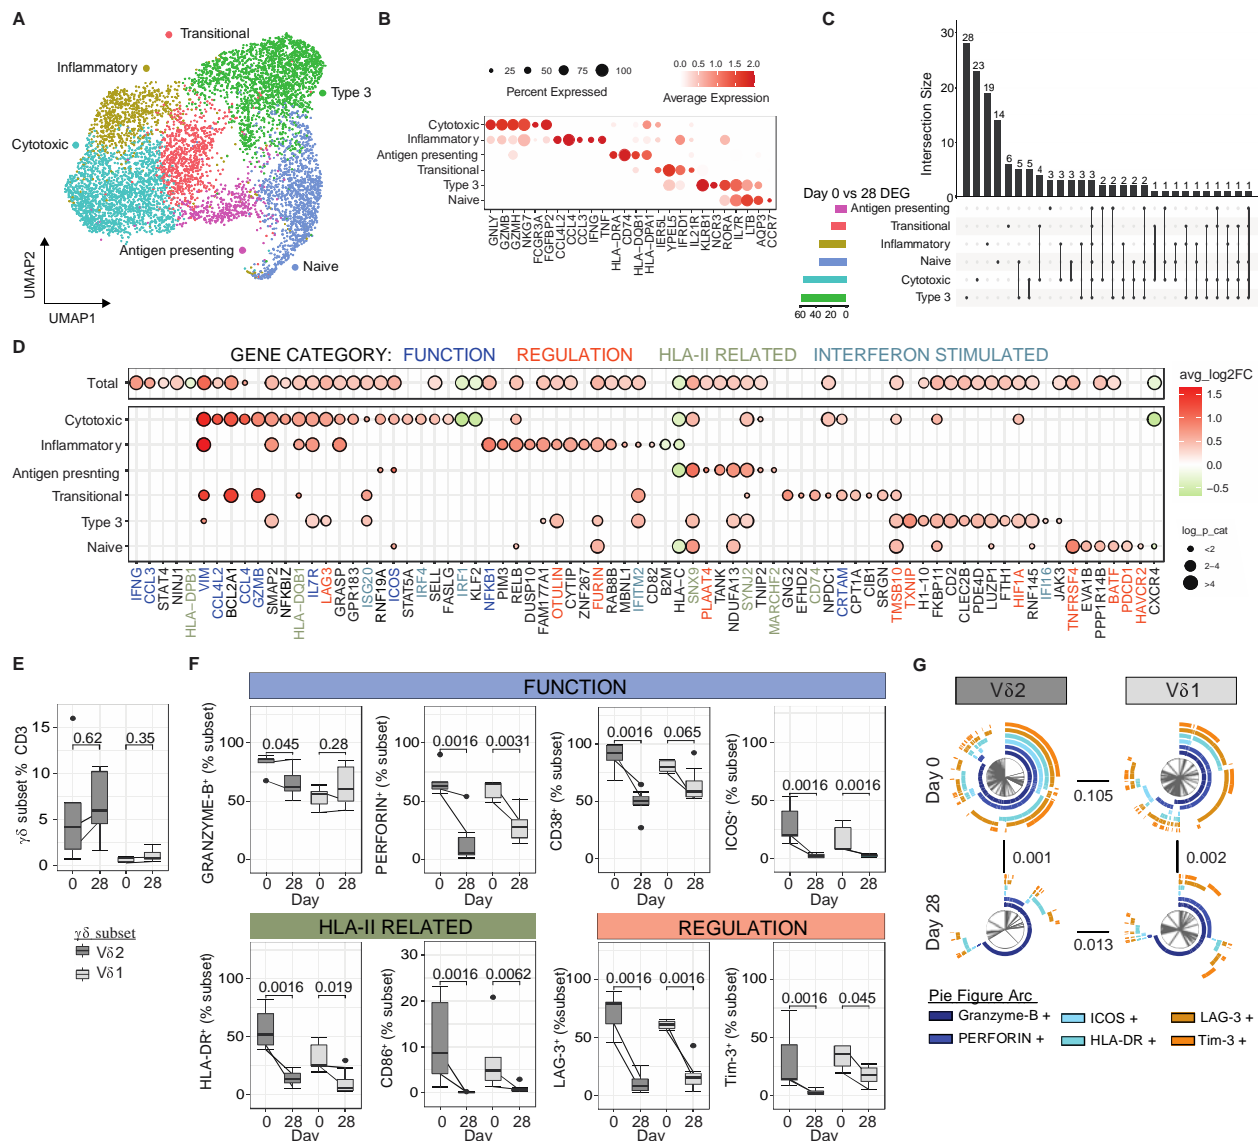

425 both functional and regulatory functions during malaria.

426 **Fig. 4. Inflammatory activation and regulation of effector  $\gamma\delta$  T cells during malaria.** (A/B)  
 427 Five subsets of  $\gamma\delta$  T cells were identified based on unsupervised clustering and marker  
 428 expression as Cytotoxic, Inflammatory, Antigen-presenting, Transitional, Type 3 and Naive. (C)

429 Numbers of upregulated DEGs in  $\gamma\delta$  T cell subsets day 0 compared to day 28. The number of  
430 shared and subset specific DEGs indicated. **(D)** Top 20 upregulated DEGs in each  $\gamma\delta$  T cells  
431 subsets, and additional genes of interest. Genes with known roles in regulation and/or function  
432 are indicated. **(E)** PBMCs from patients with falciparum malaria (Day 0,  $n = 5$ ) and convalescent  
433 malaria patients 28-days post-infection (Day 28,  $n = 8$ ) were analysed ex vivo to detect V $\delta$ 2 and  
434 V $\delta$ 1  $\gamma\delta$  T cells and measure protein expression of identified genes by flow cytometry. **(F)**  
435 Expression of proteins related to function and regulation of  $\gamma\delta$  T cells, shown as positive  
436 frequencies of V $\delta$ 2 and V $\delta$ 1  $\gamma\delta$  T cells. Box plots show the median and IQR of volunteers, lines  
437 represent paired observations, P values indicated are calculated by Mann-Whitney U test. **(G)**  
438 Co-expression of proteins related to function and regulation of V $\delta$ 2 and V $\delta$ 1  $\gamma\delta$  T cells analysed  
439 in SPICE. Pie graphs comparisons performed by Permutation test. See also Fig. S5 and Tables  
440 S6-7.

441

#### 442 **CD4 T cell response is dominated by Type 1 regulatory cells during malaria which share** 443 **signatures with Th1 cells.**

444 CD4 T cells play multiple essential roles in protection from malaria, including IFN $\gamma$  mediated  
445 direct-killing of parasites, and by providing help to B cells to produce antibodies required for  
446 protection (88). However, multiple lines of evidence have shown that malaria drives the  
447 expansion of regulatory CD4 T cells, particularly Type 1 regulatory (Tr1) cells that co-produce  
448 IFN $\gamma$  and IL10 in this disease. These cells rapidly expand via Type I IFN signalling in initial  
449 parasite infection in humans (16), and dominate the parasite specific CD4 T cell response in  
450 children in endemic areas (13–15). To investigate CD4 T cells transcriptionally during malaria,  
451 we subclustered CD4 T cells from PBMCs, with 11 subsets identified (**Fig. 5A**). These CD4 T  
452 cell subsets were annotated as naive, activated, T-regulatory (Treg), T-follicular helper (Tfh), T-  
453 follicular regulatory (Tf-reg), T-helper (Th) 1, Tr1, Th2 and Th17 subsets based on expression of  
454 T naive, activation, Treg and T helper signatures (89–92) and canonical marker genes (**Fig. 5B,**  
455 **Table S8**). The proportions of each subset within the CD4 T cells compartment did not  
456 significantly change between acute infection and post treatment timepoints. (**Fig. S6**). We  
457 conducted DEG analysis for each CD4 T cell subset, on day 0 (malaria) compared to day 28

458 (post treatment). Tr1 cells and Th1 CD4 T cells were highly transcriptionally active during  
459 infection, while Tregs and Tfregs were the least activated (**Fig. 5C, Table S9**). In Tr1 cells, 68%  
460 of DEGs were unique, consistent with a Tr1 specific activation program during malaria (**Fig.**  
461 **5C**). Upregulated genes included canonical markers of *IFNG* and *IL10*, and many other genes  
462 with known roles in immunosuppression and/or function of regulatory T cells including *LAG3*,  
463 *HAVCR2* (encoding Tim-3 (93)), *TNFR2* (94), *CTLA4* (95), *TNFRSF4* (encoding OX40/CD134  
464 (96)), *TNFRSF18* (encoding GITR/CD375 (97)), *PDCD1* (encoding PD1) and *CCL4* (98) (**Fig.**  
465 **5D**). The upregulation of multiple co-inhibitory receptors is consistent with our recent data  
466 showing Tr1 cells express overlapping co-regulatory proteins(19). Additionally, *IKZF3* which  
467 has been shown to have high expression in IL10<sup>+</sup> CD4 T cells(99) , and *LAIR2* which has been  
468 identified as a core Treg signature gene in humans(100) had increased expression on Tr1 cells  
469 during malaria (**Fig. 5D**). Tr1 cells also showed significant activation during infection, with  
470 marked upregulation of *CD38* and *ICOS* during infection. *CD38* upregulation was unique to Tr1  
471 cells, while *ICOS* was also increased on Th1 cells.

472 Tr1 cells can emerge from Th1 cells that gain IL10 expression (101). Consistent with  
473 this, most of the top upregulated genes in Tr1 cells were shared with Th1 cells, including  
474 regulatory markers *LAG3*, *TNFRSF4* (encoding OX40), *TNFRSF1B* (encoding TNFR2),  
475 *TNFRSF18* (encoding GITR), *HAVCR2* (encoding Tim-3) and *CTLA4* (**Fig. 5D**). Additional  
476 upregulated genes in Th1 cells included *MAF*, which drives IL10 expression in Th1 cells in  
477 murine malaria models (102), *PRDM1* (encoding BLIMP1), which promotes IL10 in Tr1 cells in  
478 murine malaria models (103) and is highly expressed in malaria-specific Tr1 cells in Ugandan  
479 children (13), and *STING1* (encoding STING – stimulator of interferon response cGAMP  
480 interactor 1), which we have recently shown to be a central driver of Tr1 cell development (104).



481 In Th1 and/or Tr1 cells, several other Type I IFN responses genes were up regulated, including  
482 *IFITM2*, *IFI16*, *SAT1*, *IFI35*, *IFI27L2*, *LYE6* and *ISG15* (**Fig. 5D, Table S9**). In other CD4 T  
483 cell subsets, the number of DEGs and magnitudes of fold changes to expression were relatively  
484 lower, with many ribosomal and mitochondrial genes shared across non-Th1/Tr1 subsets (**Fig.**  
485 **5C-D**). However, *BATF*, which is critical for Th17 and Tfh cell differentiation(105, 106) was  
486 upregulated across all CD4 T cell subsets except for FoxP3<sup>+</sup> Tregs. While the roles of Th17 cells  
487 in human malaria are largely unknown, Tfh cell activation and development is critical for the  
488 induction of humoral responses required to drive protection against malaria (107). Tfh cell  
489 activation during malaria is skewed towards Th1-Tfh cell responses (108–110), and consistent  
490 with this, Th2 and Tfh cells subsets upregulated both the Th1 associated cytokine TNF, and  
491 *ETS1* which represses Th2-Tfh subset differentiation in both human and mouse models of  
492 systemic lupus erythematosus (111). *ETS1* is also essential for *BATF* function in effector T cells  
493 (112). While DEGs of Tregs and Tf-reg were the lowest of all subsets, *IL2RA*, essential for Treg  
494 function(113), was upregulated in malaria in both subsets, indicative of increased functional  
495 Tregs and Tf-reg cells during infection. Together these data are indicative of CD4 T cell  
496 activation dominated by Tr1 cells with increases suppressive function during malaria, and the  
497 emergence of Tr1 cells from Th1 cells via Type I IFN signalling(16, 19).

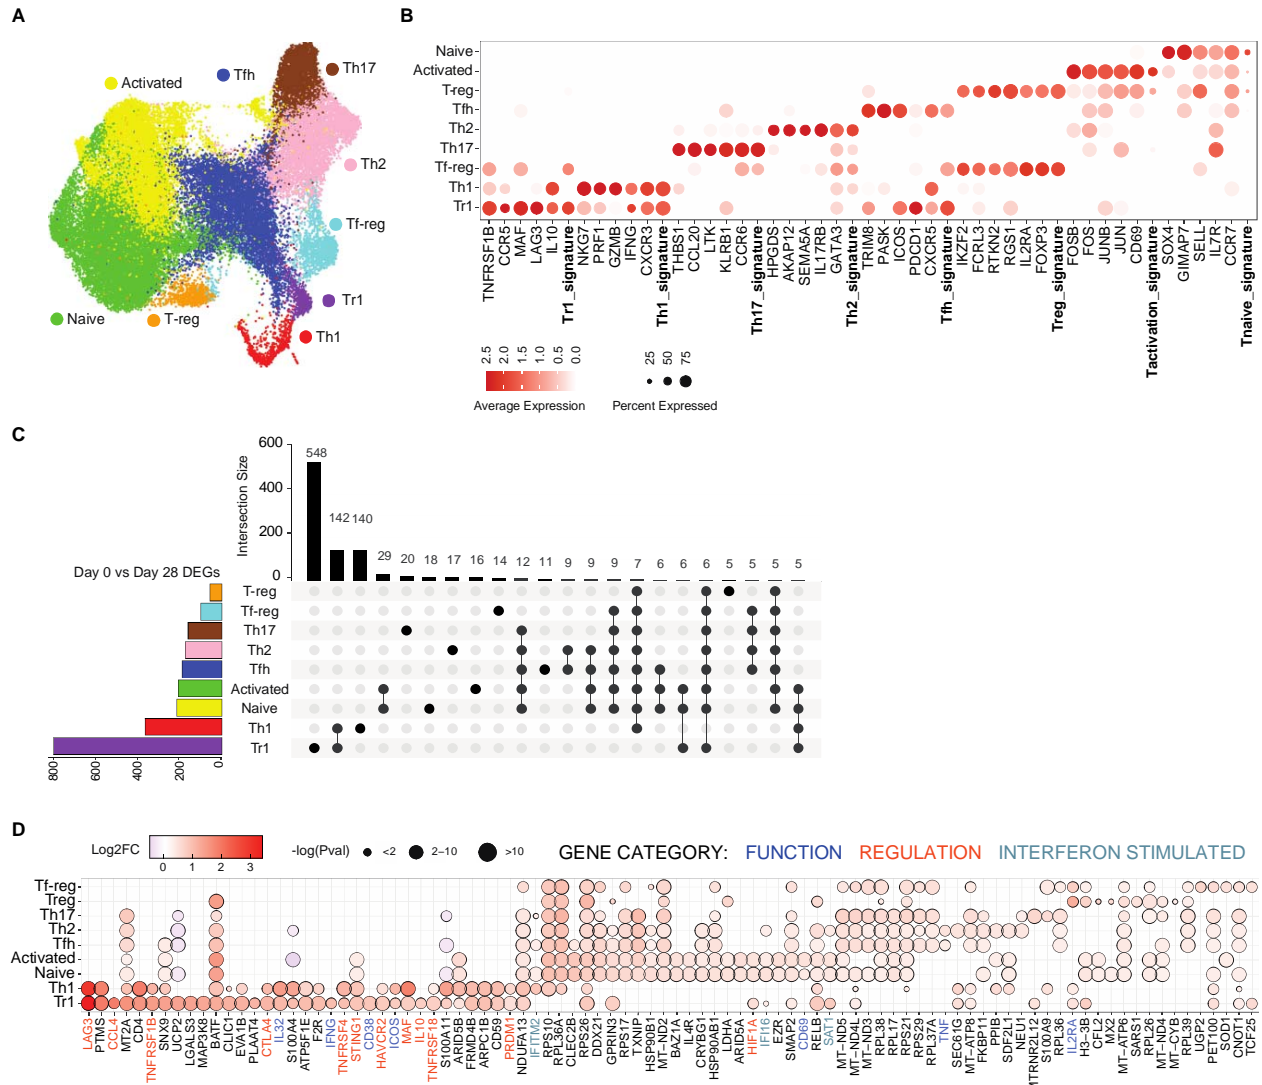

498 **Fig. 5. Tr1 CD4 T cells dominate the response during malaria.** (A/B) Subsets of CD4 T cells  
 499 were identified based on unsupervised clustering and categorized based on canonical marker  
 500 expression and T helper expression signatures. (C) DEGs in CD4 T cell subsets at day 0  
 501 compared to day 28 were identified. The number of shared and subset specific DEGs indicated in  
 502 Upset plot. Overlaps of <5 genes not shown. (D) Top upregulated 20 DEGs in CD4 T cell  
 503 subsets. Genes with known roles in regulation and/or function are indicated. See also Fig. S6 and  
 504 Tables S8-9.  
 505

## 506 **Expansion of IL10<sup>+</sup> regulatory B cells during malaria infection**

507 Malaria specific B cell responses are essential for development of immunity against malaria,  
508 with antibodies being key mediators of protection through control of parasite burden(114). While  
509 robust memory B cells and sustained antibodies can develop against malaria(22), there is  
510 evidence that these responses may also be negatively impacted by malaria driven  
511 immunomodulation. Memory B cell responses are suboptimal in some malaria transmission  
512 settings, with lower levels of antibody production, short-lived antibody responses and expanded  
513 ‘atypical’ memory B cells (20–22). Atypical memory B cells express high levels of FCLR5, and  
514 appear to have reduced functional capacity compared to ‘typical’ memory B cells (23, 24).  
515 However, ‘atypical’ responses emerge in both infection and vaccination (115), mount recall  
516 responses (116) and can produce antibodies with the support of T-follicular helper cells (117).  
517 Therefore, whether atypical memory B cells are protective or disruptive in protective immunity  
518 remains unclear.

519 To investigate transcriptional changes to B cells during malaria within our PBMC data  
520 set, B cells were sub-clustered to identify 7 subsets of B cells and annotated as transitional,  
521 naive, memory, activated, atypical, plasmablast and proliferating plasmablast populations (**Fig.**  
522 **6A**). Based on previously published studies (115, 118, 119), identified subsets included  
523 transitional B cells with high expression of *MME* (encoding CD10) and naive B cells with high  
524 expression of *TCL1A*, *NEIL1*, *IGHD*, *IGHM*, *FOXP1*, *BACH2* and *IL4R*; quiescent memory B  
525 cells which had relatively high expression of memory marker *CCR7*, and upregulated *MARCKS*,  
526 *CD82*, *IER5*, *CD70* and *CD80* which are increased in expression on memory relative to naive B  
527 cells in previously published data sets(120, 121) annotated by the Human Protein Atlas  
528 (proteinatlass.org); activated B cells with increased expression of *CD1C*, *CD79B*, *ACTG1*,

529 *GAPDH*, *TKT*, *S100A10*, *CRIP2*, *CPNE5*, and *GSN*; ‘Atypical’ memory B cells with high  
530 expression of *FCLR5*, *FCLR3*, *ITGAX* (encoding CD11c), *TNFRSF1B* and *CD86*; plasmablasts  
531 with expression of *MZB1*, *XBPI*, *IRF4*, *PRDM1* (encoding BLIMP1), and switched IgG genes;  
532 and proliferating plasma blasts which expressed plasmablast marker genes along with high levels  
533 of *MKI67* (**Fig. 6B, Table S10**). During infection (day 0), there was an increased proportion of  
534 plasmablasts, which made up to 20% of the B cell compartment, consistent with previous studies  
535 of in Ugandan (122) and Kenyan children with malaria(123), and in adults during controlled  
536 human malaria infection (124) (**Fig. S7A**).

537         DEG analysis of each B cell subset comparing day 0 to day 28, identified large numbers  
538 of DEGs across all subsets except proliferating plasmablasts (**Fig. 6C, Table S11**). DEGs were  
539 both shared and subset specific, and a large number of the top DEGs for each subset were  
540 ribosomal proteins, possibly indicating increased protein synthesis and highly activated states of  
541 B cells during infection (**Fig. 6D**). Additionally, many DEGs had roles in metabolism, consistent  
542 with reshaping of energy use and metabolic programs during B cell activation (125) (metabolic  
543 associated DEGs include members of NADH dehydrogenase complex *NDUFA1*, *NDUFA13*,  
544 *MT-ND4L*, *MT-ND2*, *MT-ND3*, cytochrome C oxidase subunit *COX7C* and chaperone *PET100*,  
545 ATP synthase subunits *ATP5MF* and *MT-ATP8*). Across B cell subsets, multiple upregulated  
546 Type I IFN signaling response genes were detected, including *IFNITM2*, *ISG20*, and *STAT1*,  
547 consistent with the important role of Type I IFN signaling in malaria immune responses across  
548 multiple cell subsets. There was evidence that metabolic remodeling during infection was B cell  
549 subset specific. For example, transitional, naive, memory B cells and atypical memory B cells  
550 during acute infection had increased expression of *TXNIP*, a glucose feedback sensor which  
551 inhibits glucose uptake (126, 127). In contrast, plasmablasts had increased *SLC7A5* (encoding

552 LAT1) and *SLC3A2* (encoding CD98 which interacts with LAT1 to transport L-glutamine),  
553 consistent with our recent findings of the importance of plasmablasts as negative regulators of  
554 germinal centre development via acting as a nutrient sink in mice models of malaria (*124*) (*128*).  
555 To confirm upregulation of glutamine transport on plasmablasts, CD98 levels were measured  
556 across B cell subsets in additional patients. We assessed CD98 expression during and after  
557 malaria in plasmablasts (CD27<sup>+</sup>CD38<sup>+</sup>), transitional/naive IgD<sup>+</sup> B cells, and IgD<sup>-</sup> B cell subsets  
558 (atypical [CD27<sup>-</sup>CD21<sup>-</sup>], memory [CD27<sup>+</sup>CD21<sup>+</sup>] and activated memory [CD27<sup>+</sup>CD21<sup>-</sup>])  
559 (**Figure S7B-C**). In these additional participants, plasmablasts made up to 30% of the B cell  
560 compartment during malaria, but less than 2% at 28 days post-treatment (**Fig. S7D**). There was  
561 also a significant increase in the proportion of activated memory cells during malaria (**Fig. S7D**).  
562 The frequency of CD98<sup>+</sup> cells increased during malaria in plasmablasts, transitional/naive,  
563 atypical and activated memory B cells (**Fig. 6E**). However, the frequency of CD98<sup>+</sup> cells, and  
564 the magnitude of CD98 expression was far greater on plasmablasts compared to other subsets  
565 (**Fig. 6F, Fig S7E-F**). Together, these data are consistent with a potential negative role of  
566 plasmablast expansion and CD98 expression as a nutrient sink that limits productive germinal  
567 center activation during infection(*124*), but shows that activated memory B cells also upregulate  
568 glutamine transport during infection.

569 Along with a potential disruptive role of plasmablasts in malaria infection, several  
570 upregulated DEGs were suggestive of other tolerized/immunosuppressed B cell responses  
571 during infection. For example, *PTPNI* (encoding PTP1B) which was upregulated in transitional,  
572 naive and memory B cell subsets, negatively regulates B cell signaling via CD40 and BAFF-R and  
573 TLR4, and downregulates T-dependent immune responses (*128*). *TLE5* (also known as AES),  
574 which negatively regulates NF- $\kappa$ B signalling (*129*), required for B cell activation and survival

575 (*I30*), was upregulated on transitional B cells during infection. Of note, *HIF1A*, which drives B  
576 cell IL10 production in hypoxic conditions (*I31*), was significantly upregulated in Atypical B  
577 cell during acute infection. Further interrogation of *HIF1A* suggested increased expression  
578 during acute infection also occurred in transitional, naive, memory B cells and plasmablasts  
579 subsets (**Fig. 6G**), consistent with the capacity of diversity of human B cells subsets to produce  
580 IL10 (*I32*). IL10 production by B cells is indicative of Breg subsets, which have been shown in  
581 mice to be a major source of IL10 during infection, and protect from experimental cerebral  
582 malaria (25, *I33*), however have yet to be identified during human malaria. To confirm the  
583 expansion of IL10<sup>+</sup> Bregs during falciparum malaria, we quantified IL10<sup>+</sup> production in B cells  
584 in additional study participants. We analyzed the total B cell population, due to the diverse B cell  
585 phenotypes of IL10<sup>+</sup> Bregs, and measured TNF and IL6 production, which are often co-produced  
586 with IL10(*I32*) (**Fig. S8A**). We confirmed that there was significant increase in IL10 production  
587 in B cells during malaria, indicating of malaria induction of Bregs (**Fig. 6H**). In contrast, there  
588 was no evidence for increased B cells expression of IL6 nor TNF, despite increased IL6  
589 transcripts levels (**Fig. S8B**). Although a previous study reported co-expression of TNF and IL6  
590 by IL10 producing Bregs (*I32*), only a small fraction of IL10<sup>+</sup> Bregs co-produced IL6 during  
591 malaria, and there was minimal co-expression with TNF (**Fig. 6I**). To assess the relative  
592 importance of Bregs, compared to IL10<sup>+</sup> T cells (largely Tr1 CD4 T cells), the proportion of B  
593 cells amongst all IL10 producing lymphocytes was measured. The proportion of IL10  
594 lymphocytes that were Bregs was comparable to CD3 cells as the source of IL10 from  
595 lymphocytes (**Fig. 6J**), identifying IL10 Bregs as a potentially important contributor to the  
596 regulatory/tolerogenic response during malaria infection in humans.

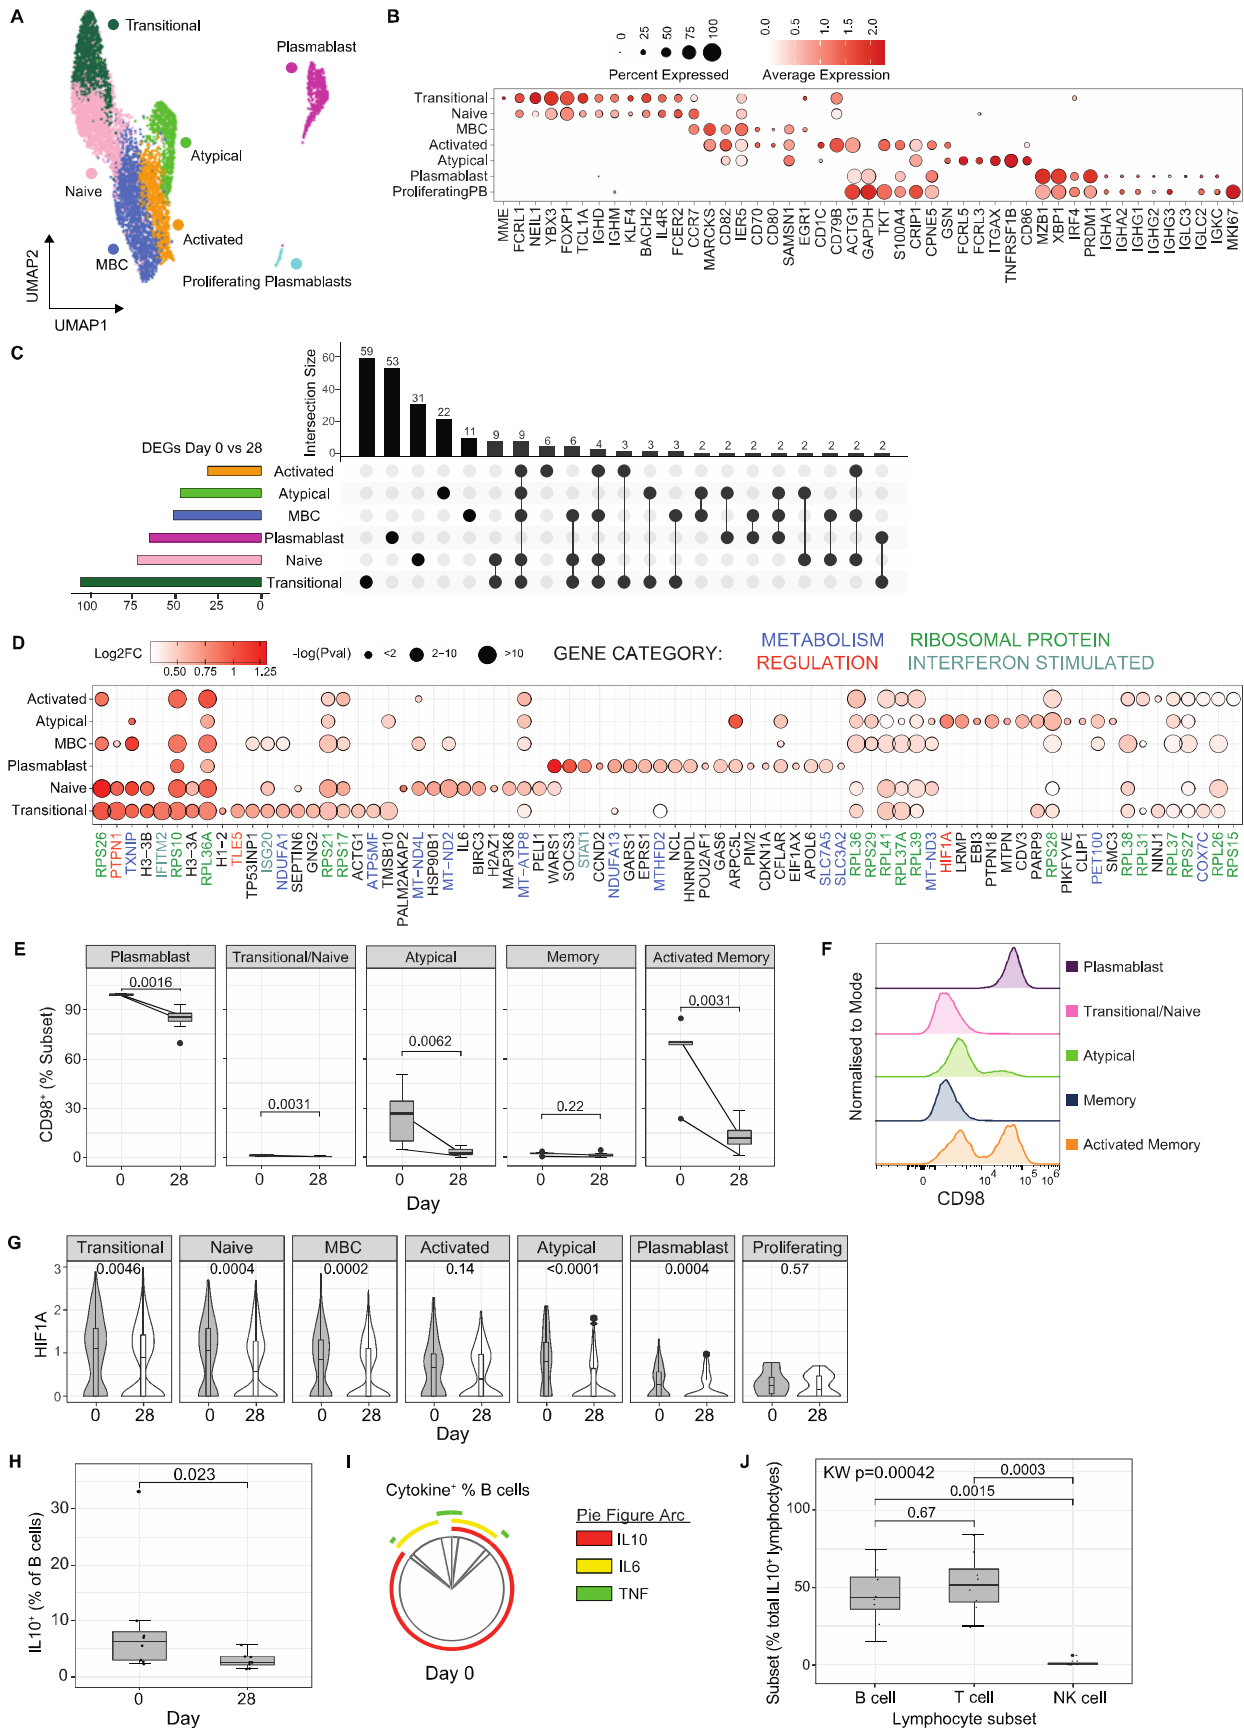

598 **Fig. 6. B cell activation and induction of IL10<sup>+</sup> Bregs during infection.** (A/B) Subsets of B  
599 cells were identified based on unsupervised clustering and categorised based on marker  
600 expression. (C) DEGs in B cell subsets day 0 compared to day 28 were identified. The number of  
601 shared and subset specific DEGs indicated in Upset plot. (D) Top upregulated 20 DEGs in B cell  
602 subsets. Genes with known roles in regulation and/or function are indicated. (E) CD98 protein  
603 expression was quantified on plasmablasts, transitional/naive, atypical, memory and activated  
604 memory B cell subsets at day 0 ( $n = 5$ ) and day 28 ( $n = 8$ ). Box plots show the median and IQR  
605 of volunteers, lines represent paired observations, group comparisons performed by Mann-  
606 Whitney U test. (F) CD98 MFI of concatenated samples at day 0 ( $n = 5$ ). (G) *HIF1A* mRNA  
607 expression in each B cell subset at day 0 and 28. P-value calculated by Mann-Whitney U test P  
608 is indicated (unadjusted). (H) IL10 protein expression on B cells during malaria (day 0,  $n = 8$ )  
609 and day 28 post treatment ( $n = 8$ ), Wilcoxon rank sum test is indicated. (I) Co-expression of B  
610 cell IL10 production with IL6 and TNF during malaria ( $n = 8$ ) analysed in SPICE. (J) The  
611 proportion of each lymphocyte subset contributing to IL10 lymphocyte production during  
612 malaria (day 0,  $n = 8$ ). P-value calculated using Kruskal wallis and post-Dunn test (FDR  
613 adjusted) indicated.



614 **DISCUSSION**

615 Malaria drives tolerogenic immune cell responses which protect from inflammation mediated  
616 immunopathogenesis at the costs of reduced parasite control and suboptimal adaptive immunity.  
617 Here, using scRNAseq analysis of PBMCs during and following falciparum malaria, we  
618 comprehensively map malaria associated tolerogenic responses across innate and adaptive  
619 immune cells. These data show that malaria driven immunomodulation occurs across the  
620 immune landscape, with subset specific activation and regulatory programs identified. By  
621 analysing malaria-driven transcriptional changes at the subset level, we not only increase our  
622 understanding of how malaria modulates specific immune cell subsets, but also identify IL10<sup>+</sup>  
623 Bregs as a major tolerogenic response in human adaptive immune cells during infection.

624         The use of scRNAseq analysis of PBMC immune responses during other infections has  
625 identified key protective and disrupted responses in various disease states (28–31). Here, we  
626 leveraged a large data set of >100 000 cells to understand malaria driven immune responses  
627 within major immune subsets, but also within subclustered cells. This approach allows for a  
628 granularity of understanding of specific cell responses not previously possible with bulk-level  
629 analysis. Within innate myeloid cells, malaria drove changes to monocytes consistent with the  
630 induction of immunosuppressive MS1-like monocytes, which have high expression of alarmins  
631 *S100A8/A9*, along with *RETN* and *ALOX5AP* and reduced expression of MHC class II. These  
632 immunosuppressive monocytes have been identified in scRNAseq data sets in both sepsis and  
633 COVID-19 patients (particularly those with severe disease), but not HIV infected individuals  
634 (29, 30, 38). During sepsis and COVID-19, immunosuppressive monocytes appear to emerge  
635 directly from inflammation-induced myelopoiesis within the bone marrow (38, 134). This  
636 pathway may also be important in malaria, with parasite infection shown to drive emergency

637 myelopoiesis in mouse models (135). How these immunosuppressive monocytes protect from  
638 parasite-mediated immunopathology is unknown, however, the importance of tolerized  
639 monocytes in anti-disease immunity to malaria has been suggested by others (8). This anti-  
640 disease protection may come at a cost to both adaptive immunity by disruption of antigen  
641 presentation via down regulation of HLA-DR, which was also seen in DCs (5), and more  
642 broadly. For example, in sepsis, immunosuppressive monocytes have reduced responsiveness to  
643 LPS (TLR4 stimulation), consistent with dysregulated response to future bacterial infection in  
644 these patients (38). Reduced responsiveness to LPS has also been reported for monocytes  
645 exposed to *P. falciparum* parasites *in vitro* (8). As such, immunosuppressive monocytes may also  
646 be an important factor in the increased risk of bacterial infection in children with recent or acute  
647 malaria (136).

648 Evidence of malaria induced immunosuppression within our data was also observed in  
649 NK and  $\gamma\delta$  T cells, where multiple co-inhibitory receptors were upregulated during infection  
650 (including *TNFRSF4*, *TNFRSF9*, *TNFRSH18*, *HAVCR2*, *LAG3*, and *PD1*). Co-inhibitory  
651 receptors play important roles in regulating immune response to chronic infections, including  
652 malaria (137). For NK cell responses, increased PD1 expression has been previously reported in  
653 malaria exposed individuals previously (10), however the roles of other co-inhibitory receptors  
654 in regulating NK cell responses during malaria is less characterised. We have recently shown  
655 that a CD56neg NK cell subset is expanded in areas of high malaria burden and have important  
656 functional roles in protecting from diseases via antibody dependent cellular cytotoxicity (138).  
657 These CD56neg NK cells had high expression of LAG-3, a molecule which has been shown in  
658 other studies to be expressed on NK cells with increased glycolytic activity and to negatively  
659 regulate NK cytokine production but not cytotoxic activity (68). Here, LAG-3 and other co-

660 inhibitory receptors appeared to be expressed to the highest levels on PD1<sup>+</sup> NK cells, which  
661 contained both CD56<sup>++</sup> and CD56dim cells. PD1<sup>+</sup> NK cells were the most highly activated NK  
662 cells during malaria, and had high granzyme-B and perforin expression, consistent with retained  
663 cytolytic capacity. Further studies are required to understand the relationship between CD56neg  
664 NK subsets, and PD1<sup>+</sup> cells. Within  $\gamma\delta$  T cells, upregulation of co-inhibitory receptors on V $\delta$ <sup>2+</sup>  
665 cells to mediate tolerance has previously been shown in areas of high malaria burden (11).  
666 Indeed, several of these regulatory genes (*BATF*, *HAVCR2*, *TXNIP*) have been previously shown  
667 to be increased transcriptionally and at the protein level in  $\gamma\delta$  T cells in children with recent or  
668 high levels of repeated infection (11, 75, 86), and here we show that co-inhibitory receptors are  
669 also upregulated during an acute infection in a low transmission setting. In areas of high malaria  
670 burden, V $\delta$ <sup>2+</sup>  $\gamma\delta$  T cells with inhibitory receptors maintain or have enhanced cytolytic capacity  
671 and antibody dependent functions (76). Consistent with this, co-inhibitory markers were  
672 upregulated both transcriptionally and at the protein level was con-current with increased  
673 Granzyme-B and perforin, indicative of cytolytic function. Together, these data suggest that  
674 regulatory proteins play a role in controlling inflammation, while maintaining other functions of  
675 NK and  $\gamma\delta$  T cells.

676         Within CD4 and B cell subsets, tolerogenic responses appeared dominated by a major  
677 upregulation of IL10. Within CD4 T cells, the Tr1 cell subset was the most highly activated  
678 during malaria, and these cells had significantly increased transcription of both canonical  
679 cytokines IL10 and IFN $\gamma$ , and also multiple co-inhibitory receptors (including *LAG3*, *OX40*,  
680 *TNFR2*, *GITR*, *TIM3* and *CTLA4*). A large proportion of malaria-driven DEGs in Tr1 cells were  
681 shared with Th1 cells, consistent with an emergence of Tr1 cells from the Th1 cell subset (101).  
682 Accordingly, DEGs in Tr1 cells also included transcriptional factors with known roles in Tr1 cell

683 development (*MAF, PRDM1 and STING*)(19, 102–104). Similarly, within B cell subsets, malaria  
684 drove a significant increase in *HIF1A* expression, which has previously been shown to be a  
685 critical transcription factor for the induction of IL10 producing Bregs in mouse models (131).  
686 Consistent with this, we show significantly increased *ex vivo* secretion of IL10 from B cells  
687 during malaria compared with 28 days post-treatment. Indeed, during infection B cells were a  
688 major contributor of IL10 from lymphocytes during malaria. While IL10 producing CD4 T cells  
689 have been well recognised in malaria (13, 15, 103, 104, 139), this study is the first to identify B  
690 cells as a major source of IL10 during human malaria. Further studies are needed to understand  
691 the development of Bregs during malaria, their roles in anti-disease and anti-parasitic (140)  
692 immunity and/or immunosuppression. The potential link between Tr1 cells as the driver of Breg  
693 activation to suppress inflammation and disease as shown in other settings (141) .

694 Linking malaria-induced tolerogenic responses across all immune cell subsets, is the  
695 importance of Type I IFN signalling, with evidence of upregulation of Type I IFN responses and  
696 increased transcription of IFN-stimulated genes across the immune landscape. While first  
697 described in viral infection as critical effector cytokines, Type I IFNs also exhibit  
698 immunoregulatory effects that impeded control of some non-viral pathogens(142), including  
699 protozoan parasites (143). In malaria infection, Type I IFNs have both protective and detrimental  
700 impacts on immune response, parasite clearance and protection from immunopathogenesis,  
701 dependent on timing, parasite species and model system (reviewed in (26)). However, previous  
702 studies in human experimental infection have shown that *P. falciparum* parasites rapidly induce  
703 Type I IFNs that enhance development of regulator Tr1 CD4 T cells(16). While not directly  
704 investigated in malaria, Type I IFN signalling negatively regulates NK cell inflammatory  
705 response during viral infection (71), promotes upregulation of LAG-3 on NK cells in healthy

706 donors (68), and drives Breg induction in helminth infection (144). Due to the central role of  
707 Type I IFN signalling in driving immunoregulatory responses in malaria, our team is now  
708 exploring whether host-directed therapies that transiently block Type I IFNs may have  
709 therapeutic roles in enhancing protective anti-parasitic immunity (145, 146).

710 A number of limitations of our study should be noted. Due to low cell numbers  
711 contributing to subclustered cell types we were not able to analyse scRNAseq data at the  
712 individual cell level, and therefore may have overlooked individual level heterogeneity. To  
713 address this, we instead confirmed key transcriptional changes at the protein level in additional  
714 patients. The limited number of individuals analysed by scRNAseq also precludes the analysis of  
715 the impact of other host factors such as age, sex and/or parasite burden on transcriptional  
716 changes. Future studies could take advantage of rapidly developing technologies to increase cell  
717 numbers and/or individuals. Additional technical limitations include the use of 3' sequencing, as  
718 such clonal development and TCR/VDJ usage was not investigated. Additionally, only PBMCs  
719 responses were assessed, and how these peripheral responses related to the immune response  
720 within tissues is unknown. Finally, our study only investigates one study site with all patients >3  
721 years of age and presenting with uncomplicated falciparum malaria, and as such the broad  
722 application of results to other malaria transmission settings, young patients and/or disease  
723 phenotypes is unknown.

724 In conclusion, we use scRNAseq analysis of a large number of PBMC cells to make a  
725 granular level study of immunoregulatory responses across the immune landscape during  
726 falciparum malaria. All data sets and interactive integrated scRNAseq data file is made publicly  
727 available for future analysis of the malaria immune landscape by the research community.

## 728 **MATERIALS AND METHODS**

### 729 **Study Design**

730 To investigate malaria driven transcriptional changes in specific immune cell subsets, we sorted  
731 live PBMCs from 6 malaria infected donors (day 0), and two subsequent time points after drug  
732 treatment (day 7 and 28), along with PBMCs from 2 healthy controls. We performed scRNAseq  
733 of these cells, and used clustering and sub-clustering to identify specific immune cell subsets.  
734 Differential gene analysis between day 0 and day 28 was performed for each cell cluster and sub-  
735 cluster. Key transcriptional changes were confirmed at the protein level with additional donor  
736 samples. Patient demographics are in Tables S1, S12 and S13.

### 737 **Ethics statement**

738 Ethics approval for the use of human samples was obtained from the QIMR Berghofer Human  
739 Research Ethics Committee (HREC P3444), the Northern Territory Department of Health and  
740 Menzies School of Health Research ethics committee (HREC 2010-1431), and Medical Research  
741 and Ethics Committee, Ministry of Health, Malaysia (NMRR-10-754-6684 and NMRR-12-499-  
742 1203). Written informed consent was obtained from all adult study participant or, in the case of  
743 children, parents or legal guardians.

### 744 **Study participants and peripheral blood mononuclear cell processing**

745 Peripheral blood mononuclear cells (PBMCs) were obtained from patients with acute  
746 uncomplicated clinical *Plasmodium falciparum* malaria from Sabah, Malaysia enrolled in  
747 prospective comparative studies of *falciparum*, *vivax* and *knowlesi* malaria, including at three  
748 district hospital sites (Kudat, Kota Marudu and Pitas) (147, 148), and a tertiary referral center  
749 (Queen Elizabeth Hospital, Kota Kinabalu) (149). This cohort has a high proportion of infected  
750 males across all malaria species, possibly because of infection risk of forest worker (147).

751 Patients (aged 3-55) who were positive for Plasmodium species confirmed by microscopy and  
752 PCR, who had a fever at the time of presentation or a history of fever in the preceding 24 hours,  
753 and who provided consent, were enrolled. Individuals who had been living in the area in the  
754 preceding 3 weeks, who were negative for Plasmodium spp. by microscopy and PCR, and who  
755 had no history of fever in previous 48 hours were enrolled as endemic healthy controls. Blood  
756 was collected in lithium-heparin collection tubes at the time of presentation and follow-up visits  
757 at days 7 and 28 after anti-malarial drug treatment (148, 149). PBMCs were isolated from whole  
758 blood via density centrifugation with Ficoll-Paque prior to cryopreservation. Samples were  
759 selected for this study based on availability.

#### 760 **10X Genomics Chromium GEX Library preparation and sequencing**

761 PBMC samples were thawed in RPMI 1640 (Gibco) containing 10% FCS and 0.02% Benzonase.  
762 1E6 PBMCs were stained for viability with Propidium iodide (PI) and live cells were sorted on  
763 BD FACSAria™ III Cell Sorter into 2% FBS/PBS and counted on hemocytometer. Up to 10 000  
764 cells were loaded into each lane of Chromium Next GEM Single Cell 3' Reagent Kit v3.1 and  
765 Gel Bead-in-Emulsion (GEMs) generated in Chromium Controller. Samples were run in two  
766 batches, which were later integrated. 3' Gene Expression Libraries were then generated  
767 according to manufacturer's instructions. Generated libraries were sequenced in a NextSeq 550  
768 System using High Output Kit (150 Cycles) version 1 according to manufacturer's protocol  
769 using paired-end sequencing (150-bp Read 1 and 150 bp Read 2) with the following parameters  
770 Read 1: 28 cycles, Index 1: 8 cycles, Read 2: 91 cycles.

#### 771 **scRNAseq transcriptomic analysis**

772 *Pre-processing of raw sequencing files*

773 Single cell sequencing data was demultiplexed, aligned and quantified using Cell Ranger version  
774 3.1.0 software (10x Genomics) against the human reference genome (GRCh38-3.0.0), with  
775 default parameters. Raw sequencing data and processed Cell Ranger outputs are found at  
776 GSE217930, <https://www.ncbi.nlm.nih.gov/geo/query/acc.cgi?acc=GSE217930>. Cell ranger  
777 count matrices for each sample (donor and day) were loaded, merged and analysed using Seurat  
778 package v4 (150). Cell cycle scores, mitochondria DNA transcripts and complexity score  
779 (log<sub>10</sub>genes per UMI) were calculated per cell using Seurat built-in functions. Cell cycle score  
780 was assigned to each cell using the CellCycleScoring function and evaluated with Principal  
781 Component Analysis (PCA). Cells with less than 20% of mitochondria DNA transcripts,  
782 complexity score higher than 0.8 and at least 250 genes and 500 UMIs were retained. At the gene  
783 level, any hemoglobin-associated genes and genes expressed in less than ten cells were filtered  
784 out. The filtered dataset was scaled to regress out the effects of mitochondria DNA transcripts  
785 content and cell cycle using the ScaleData function, which regresses each variable individually.  
786 We followed the integration workflow included in Seurat to remove unwanted sources of  
787 variation. In detail, filtered data was split per donor and day. Each dataset was normalise using  
788 the NormalizeData function, and the most variable genes in each of them were selected using  
789 FindVariableFeatures. Before integration, the most variable genes shared among the datasets  
790 were identified using FindIntegrationAnchors and used to integrate the datasets using  
791 IntegrateData function.

### 792 *Cell clustering and sub-clustering*

793 Principal components (PCs) were calculated and the first 30 PCs were used to identify  
794 transcriptional clusters and uniform manifold approximation and projection (UMAP)  
795 dimensional reduction ('RunPCA' and 'RunUMAP' functions). Nearest neighbours were



796 calculated and cluster resolution set at 0.6. Cells were annotated based on canonical marker  
797 expression, with 15 cell clusters identified. For NK,  $\gamma\delta$ , CD4 and B cells, sub-clustering analysis  
798 was performed. For CD4 T cells, T helper signatures from prior publications; Tfh (89), Tr1 (92)  
799 and Th1, Th2, Th17, Treg (90) were analysed within sub clusters. For high level cell clusters,  
800 and sub-clustering analysis, marker genes for all clusters (outputs from ‘FindAllMarkers’) are in  
801 **Tables S2, S4, S6, S8 and S10**. Processed Seurat file “annotated\_Sabah\_data\_21Oct2022.rds” is  
802 found <https://doi.org/10.5281/zenodo.6973241>

### 803 *Differential gene expression analysis*

804 To identify genes differentially expressed during malaria, ‘FindMarkers’ function with default  
805 parameters in Seurat was used comparing specific cell subsets at different time points. DEGs for  
806 each cluster and subcluster are found in **Tables S3, S5, S7, S9 and S11**. Identified DEGs were  
807 analysed via Gene Set Enrichment Analysis (151) to identify significantly enriched gene  
808 ontology (GO) terms for each high-level cluster and subcluster during malaria infection. The  
809 HOMER v4.9 package was used to identify significantly overrepresented upstream regulators, of  
810 cis-elements 1 kb upstream of the transcription start site (TSS) of the DEGs using the  
811 findMotifs.pl script (152).

### 812 **Flow cytometric cell phenotyping comparison of scRNAseq samples**

813 2 million cells from the same PBMC vial as used for scRNAseq was used for phenotyping of  
814 major cell subsets (**Table S1**). Cells were stained at room temperature with LIVE/DEAD™  
815 Fixable Blue and surface markers with antibodies purchased from BD Biosciences or Biolegend  
816 (**Table S12**). Data were acquired with 3-laser Cytex Aurora, and subsets identified as described  
817 in **Fig. S1**.

### 818 **Flow cytometric ex vivo cytokine production analysis**

819 PBMCs were thawed and 1 million cells incubated at 37°, 5% CO<sub>2</sub> for 2 hours in additional  
820 study patients with falciparum malaria at day 0 and day 28 post-treatment (Table S12). Protein  
821 transport inhibitor containing Monensin and protein transport inhibitor containing Brefeldin A  
822 were added to cells (both 10 µg/ml, BD Biosciences) and cells cultured for an additional 4 hours.  
823 Cell surface staining was performed at RT for 15 minutes with a panel of antibodies purchased  
824 from Biolegend, BD Biosciences or Miltenyi (Table S13). Following 2 washes with  
825 2%FCS/PBS, cells were permeabilised with BD cytofix/cytoperm solution for 20 minutes on ice.  
826 Intracellular staining (ICS) was performed following this to assess cytokine production.  
827 Intracellular staining was performed using antibodies listed in (Table S13). Samples were  
828 incubated with the antibodies for 30 minutes on ice, washed twice with BD perm wash buffer  
829 then fixed with BD stabilising fixative. All samples were resuspended in 200µl of 2%FCS/PBS  
830 to be acquired the following day. Data were acquired using a Cytex Aurora 5, and subsets  
831 identified as shown in **Fig. S2 and S8A**. To identify CD16 monocytes, an alternative gating  
832 strategy based on CCR2 and CD33 expression (153), due to the rapid down regulation of CD16  
833 in cultured cells.

#### 834 **Flow cytometric ex vivo cell phenotyping of DEGs**

835 PBMCs were thawed in additional malaria study patients at day 0, and day 28 post malaria  
836 infection. Due to sample limitations, not all patients had paired samples for this analysis (**Table**  
837 **S13**). Surface markers, dead cell stains and intracellular stains were performed at the  
838 concentrations provided with antibodies purchased from Becton-Dickson Biosciences, Biolegend  
839 or Invitrogen (**Table S14**). PBMCs were stained with CD366 (Tim-3) and CD223 (LAG-3) at  
840 37°C for 90 minutes. Cells were then stained at RT for 15 minutes with LIVE/DEAD™ Fixable  
841 Blue Dead Cell Stain, washed twice with 2% FCS/PBS and stained at RT for 30 minutes for

842 additional surface markers. Following 2 washes with 2% FCS/PBS, cells were permeabilised  
843 with eBioscience™ Fixation/Permeabilization solution for 20 minutes on ice. Intracellular  
844 staining (ICS) was performed for 30 minutes on ice following washes to assess intracellular  
845 proteases and glycoproteins. Cells were fixed with BD stabilising fixative then resuspended in  
846 200µl of 2%FCS/PBS until acquisition. Data were acquired using a Cytex Aurora 5 and subsets  
847 and marker expression identified as described in **Fig. S4A, S4B, S5B, S5C, S7B, and S7C**.

#### 848 **Flow cytometric analysis**

849 Flow cytometry data were analyzed in FlowJo version 10. Gating strategies are outlined in **Fig.**  
850 **S1, S2, S4A, S5B, S7B-C and S8A**. To measure the co-expression of cytokines or other markers  
851 on specific subsets, expression was analysed by SPICE (Simplified presentation of incredibly  
852 complex evaluations (46)), and permutation tests between combinations of cytokines/markers  
853 performed.

#### 854 **Statistical analysis**

855 All statistical analysis was performed in RStudio (R version 4.0 or greater). All statistical tests  
856 are two-sided. To assess correlations between cellular clusters identified by scRNAseq and flow  
857 cytometry, Pearson correlations were calculated. For cell proportions and expression levels, for  
858 paired data, Wilcoxon signed-rank test was used and for unpaired data, Mann-Whitney U test  
859 was performed.

860

#### 861 **Acknowledgments:**

862 We thank all the participants and parents of guardians involved in the clinical studies, along with  
863 the Malaysian Ministry of Health hospital directors and clinical staff at Kudat, Kota Marudu and  
864 Pitas district hospitals and at Queen Elizabeth Hospital, Kota Kinabalu. We thank support staff in

865 QIMR Flow Cytometry and Imaging Facility, QIMR Sample Processing and Sequencing  
866 Service, and Dr. Jessica Engel for laboratory support.

867 **Funding:** This work was supported by the National Health and Medical Research Council of  
868 Australia (Career Development Fellowship 1141632 to MJB, Ideas Grant 1181932 to  
869 MJB, Program Grants 1037304 and 1132975 to NMA, Senior Principal Research  
870 Fellowship 1135820 to NMA and by The Australian Centre of Research Excellence in  
871 Malaria Elimination Seed Grant to JRL

872 **Author contributions:**

873 Conceptualization: TGC, JRL, MJB

874 Methodology: TGC, JRL, MJB

875 Software: NLD, TGC, ZP, MJB

876 Validation: NLD, TGC, ZP, JRL, JH, DA, MSFS, MJB.

877 Formal analysis: NLD, TGC, ZP, JRL, DA, JH, MJB

878 Investigation: NLD, TGC, ZP, KB, JRL, DA, MSFS, AS, MJB

879 Resources: KP, TW, BB, MJG, NA,

880 Data Curation : NLD, TGC, ZP, MJB

881 Writing - Original Draft: NLD, TGC, MJB

882 Writing - Review & Editing: NLD, JRL, MS, BB, JAL, CRE, NMA, MJB

883 Visualization: NLD, TGC, JRL, JH, MJB

884 Supervision: AL, CE, MJB

885 Project administration: MJB,

886 Funding acquisition: JRL, NMA, MJB

887 All authors have read and approved the final version of the manuscript. MJB approves this  
888 version of the manuscript on behalf of TGC (deceased).

889 **Competing interests:**

890 All authors declare no conflicts of interest

891 **Data and materials availability:**

892 Raw sequencing data and processed Cell Ranger outputs are found

893 GSE217930, <https://www.ncbi.nlm.nih.gov/geo/query/acc.cgi?acc=GSE217930>

894 Processed Seurat file “annotated\_Sabah\_data\_21Oct2022.rds” is found

895 <https://doi.org/10.5281/zenodo.6973241>

896

897 **Supplementary Materials**

898 Fig. S1. Gating strategy of flow cytometric cell phenotyping comparison of scRNAseq samples.

899 Fig. S2. Innate cell subset gating strategy for *ex vivo* cytokine analysis.

900 Fig. S3. GSEA of DEGs from NK cell subsets.

901 Fig. S4. Flow cytometry analysis of NK cells.

902 Fig. S5. Flow cytometry analysis of  $\gamma\delta$  T cells.

903 Fig. S6. Proportional distribution of CD4 T cell subsets.

904 Fig. S7. Proportional distribution of B cell subsets and CD98 protein expression.

905 Fig. S8. Intracellular cytokine expression by major lymphocyte subsets.

906 Table S1. Patient characteristics for scRNAseq.

907 Table S2. PBMC cluster marker genes (attached file)

908 Table S3. PBMC cluster DEGs (attached file)

909 Table S4. NK subset marker genes (attached file)

- 910 Table S5. NK subset DEGs (attached file)
- 911 Table S6.  $\gamma\delta$  T cell subset marker genes (attached file)
- 912 Table S7.  $\gamma\delta$  T cell subset DEGs (attached file)
- 913 Table S8. CD4 T cell subset marker genes (attached file)
- 914 Table S9. CD4 T cell subset DEGs (attached file)
- 915 Table S10. B cell subset marker genes (attached file)
- 916 Table S11. B cell subset DEGs (attached file)
- 917 Table S12. Patient characteristics for *ex vivo* cytokine production analysis.
- 918 Table S13. Patient characteristics for *ex vivo* cell phenotyping
- 919 Table S14: Antibodies for *ex vivo* cell phenotyping comparison of scRNAseq samples
- 920 Table S15: Antibodies for *ex vivo* cytokine analysis
- 921 Table S16: Antibodies for *ex vivo* cell phenotyping analysis
- 922

923 **References and Notes**

- 924 1. WHO., *World malaria report 2021* (Geneva: World Health Organization, Geneva;  
925 <https://www.who.int/publications/i/item/9789240040496>).
- 926 2. B. P. Gonçalves, C.-Y. Huang, R. Morrison, S. Holte, E. Kabyemela, D. R. Prevots, M. Fried,  
927 P. E. Duffy, Parasite Burden and Severity of Malaria in Tanzanian Children. *New Engl J*  
928 *Medicine* **370**, 1799–1808 (2014).
- 929 3. J. R. Loughland, G. Minigo, J. Burel, P. E. Tipping, K. A. Piera, F. H. Amante, C. R.  
930 Engwerda, M. F. Good, D. L. Doolan, N. M. Anstey, J. S. McCarthy, T. Woodberry, Profoundly  
931 Reduced CD1c<sup>+</sup> Myeloid Dendritic Cell HLA-DR and CD86 Expression and Increased Tumor  
932 Necrosis Factor Production in Experimental Human Blood-Stage Malaria Infection. *Infection*  
933 *and Immunity* **84**, 1403–1412 (2016).
- 934 4. J. R. Loughland, T. Woodberry, M. Field, D. W. Andrew, A. SheelaNair, N. L. Dooley, K. A.  
935 Piera, F. H. Amante, E. Kenangalem, R. N. Price, C. R. Engwerda, N. M. Anstey, J. S.  
936 McCarthy, M. J. Boyle, G. Minigo, Transcriptional profiling and immunophenotyping show  
937 sustained activation of blood monocytes in subpatent Plasmodium falciparum infection. *Clinical*  
938 *& Translational Immunology* **9**, 126–18 (2020).
- 939 5. A. Pinzon-Charry, T. Woodberry, V. Kienzle, V. McPhun, G. Minigo, D. A. Lampah, E.  
940 Kenangalem, C. Engwerda, J. A. López, N. M. Anstey, M. F. Good, Apoptosis and dysfunction  
941 of blood dendritic cells in patients with falciparum and vivax malaria Blood DC dysfunction in  
942 malaria. *J Exp Medicine* **210**, 1635–1646 (2013).
- 943 6. T. Woodberry, G. Minigo, K. A. Piera, F. H. Amante, A. Pinzon-Charry, M. F. Good, J. A.  
944 Lopez, C. R. Engwerda, J. S. McCarthy, N. M. Anstey, Low-Level Plasmodium falciparum

- 945 Blood-Stage Infection Causes Dendritic Cell Apoptosis and Dysfunction in Healthy Volunteers.  
946 *J Infect Dis* **206**, 333–340 (2012).
- 947 7. S. Portugal, J. Moebius, J. Skinner, S. Doumbo, D. Doumtabe, Y. Kone, S. Dia, K.  
948 Kanakabandi, D. E. Sturdevant, K. Virtaneva, S. F. Porcella, S. Li, O. K. Doumbo, K. Kayentao,  
949 A. Ongoiba, B. Traore, P. D. Crompton, Exposure-Dependent Control of Malaria-Induced  
950 Inflammation in Children. *Plos Pathog* **10**, e1004079 (2014).
- 951 8. R. Guha, A. Mathioudaki, S. Doumbo, D. Doumtabe, J. Skinner, G. Arora, S. Siddiqui, S. Li,  
952 K. Kayentao, A. Ongoiba, J. Zaugg, B. Traore, P. D. Crompton, Plasmodium falciparum malaria  
953 drives epigenetic reprogramming of human monocytes toward a regulatory phenotype. *Plos*  
954 *Pathog* **17**, e1009430 (2021).
- 955 9. J. B. Weinberg, A. D. Volkheimer, M. P. Rubach, S. M. Florence, J. P. Mukemba, A. R.  
956 Kalingonji, C. Langelier, Y. Chen, M. Bush, T. W. Yeo, D. L. Granger, N. M. Anstey, E. D.  
957 Mwaikambo, Monocyte polarization in children with falciparum malaria: relationship to nitric  
958 oxide insufficiency and disease severity. *Sci Rep-uk* **6**, 29151 (2016).
- 959 10. J. Moebius, R. Guha, M. Peterson, K. Abdi, J. Skinner, S. Li, G. Arora, B. Traore, S.  
960 Rajagopalan, E. O. Long, P. D. Crompton, PD-1 Expression on NK Cells in Malaria-Exposed  
961 Individuals Is Associated with Diminished Natural Cytotoxicity and Enhanced Antibody-  
962 Dependent Cellular Cytotoxicity. *Infect Immun* **88** (2020), doi:10.1128/iai.00711-19.
- 963 11. P. Jagannathan, C. C. Kim, B. Greenhouse, F. Nankya, K. Bowen, I. Eccles-James, M. K.  
964 Muhindo, E. Arinaitwe, J. W. Tappero, M. R. Kanya, G. Dorsey, M. E. Feeney, Loss and  
965 dysfunction of V $\delta$ 2<sup>+</sup>  $\gamma\delta$  T cells are associated with clinical tolerance to malaria. *Sci Transl Med*  
966 **6**, 251ra117-251ra117 (2014).



- 967 12. K. W. Dantzer, L. Parte, P. Jagannathan, Emerging role of  $\gamma\delta$  T cells in vaccine-mediated  
968 protection from infectious diseases. *Clinical & Translational Immunology* **8**, 1217–16 (2019).
- 969 13. M. J. Boyle, P. Jagannathan, K. Bowen, T. I. McIntyre, H. M. Vance, L. A. Farrington, A.  
970 Schwartz, F. Nankya, K. Naluwu, S. Wamala, E. Sikyomu, J. Rek, B. Greenhouse, E. Arinaitwe,  
971 G. Dorsey, M. R. Kamya, M. E. Feeney, The Development of Plasmodium falciparum-Specific  
972 IL10 CD4 T Cells and Protection from Malaria in Children in an Area of High Malaria  
973 Transmission. *Frontiers in immunology* **8**, 1329 (2017).
- 974 14. M. J. Boyle, P. Jagannathan, K. Bowen, T. I. McIntyre, H. M. Vance, L. A. Farrington, B.  
975 Greenhouse, F. Nankya, J. Rek, A. Katureebe, E. Arinaitwe, G. Dorsey, M. R. Kamya, M. E.  
976 Feeney, Effector Phenotype of Plasmodium falciparum-Specific CD4<sup>+</sup> T Cells Is Influenced by  
977 Both Age and Transmission Intensity in Naturally Exposed Populations. *The Journal of*  
978 *infectious diseases* **212**, 416–425 (2015).
- 979 15. P. Jagannathan, I. Eccles-James, K. Bowen, F. Nankya, A. Auma, S. Wamala, C. Ebusu, M.  
980 K. Muhindo, E. Arinaitwe, J. Briggs, B. Greenhouse, J. W. Tappero, M. R. Kamya, G. Dorsey,  
981 M. E. Feeney, IFN $\gamma$ /IL-10 co-producing cells dominate the CD4 response to malaria in highly  
982 exposed children. *PLoS pathogens* **10**, e1003864 (2014).
- 983 16. M. M. de Oca, R. Kumar, F. de L. Rivera, F. H. Amante, M. Sheel, R. J. Faleiro, P. T. Bunn,  
984 S. E. Best, L. Beattie, S. S. Ng, C. L. Edwards, G. M. Boyle, R. N. Price, N. M. Anstey, J. R.  
985 Loughland, J. Burel, D. L. Doolan, A. Haque, J. S. McCarthy, C. R. Engwerda, Type I  
986 Interferons Regulate Immune Responses in Humans with Blood-Stage Plasmodium falciparum  
987 Infection. *CellReports* **17**, 399–412 (2016).
- 988 17. A. Abel, C. Steeg, F. Aminkiah, O. Addai-Mensah, M. Addo, N. Gagliani, C. Casar, D. D.  
989 Yar, E. Owusu-Dabo, T. Jacobs, M. S. Mackroth, Differential expression pattern of co-inhibitory

- 990 molecules on CD4<sup>+</sup> T cells in uncomplicated versus complicated malaria. *Sci Rep-uk* **8**, 4789  
991 (2018).
- 992 18. M. S. Mackroth, A. Abel, C. Steeg, J. S. zur Wiesch, T. Jacobs, Acute Malaria Induces  
993 PD1<sup>+</sup>CTLA4<sup>+</sup> Effector T Cells with Cell-Extrinsic Suppressor Function. *Plos Pathog* **12**,  
994 e1005909 (2016).
- 995 19. C. Edwards, S. Ng, F. Rivera, D. Corvino, M. M. de Oca, L. Bukali, T. Frame, P. Bunn, S.  
996 Chauhan, S. Singh, Y. Wang, J. Engel, J. Na, F. Amante, J. Loughland, M. Soon, N. Waddell, P.  
997 Mukhopadhyay, L. Koufariotis, R. Johnston, J. Lee, R. Kuns, P. Zhang, S. Nylen, S. Sundar, M.  
998 Boyle, G. Hill, J. McCarthy, R. Kumar, C. Engwerda, A molecular signature for human IL-10-  
999 producing Th1 cells in malaria. *Journal of Clinical Investigation* , in revision.
- 1000 20. C. Sundling, C. Rönnberg, V. Yman, M. Asghar, P. Jahnmatz, T. Lakshmikanth, Y. Chen, J.  
1001 Mikes, M. N. Forsell, K. Sondén, A. Achour, P. Brodin, K. E. Persson, A. Färnert, B cell  
1002 profiling in malaria reveals expansion and remodelling of CD11c<sup>+</sup> B cell subsets. *JCI insight* **5**  
1003 (2019), doi:10.1172/jci.insight.126492.
- 1004 21. G. E. Weiss, P. D. Crompton, S. Li, L. A. Walsh, S. Moir, B. Traore, K. Kayentao, A.  
1005 Ongoiba, O. K. Doumbo, S. K. Pierce, Atypical memory B cells are greatly expanded in  
1006 individuals living in a malaria-endemic area. *Journal of immunology (Baltimore, Md. □: 1950)*  
1007 **183**, 2176–2182 (2009).
- 1008 22. D. Pérez-Mazliah, F. M. Ndungu, R. Aye, J. Langhorne, B-cell memory in malaria: Myths  
1009 and realities. *Immunological reviews* **293**, 57–69 (2019).
- 1010 23. S. Portugal, C. M. Tipton, H. Sohn, Y. Kone, J. Wang, S. Li, J. Skinner, K. Virtaneva, D. E.  
1011 Sturdevant, S. F. Porcella, O. K. Doumbo, S. Doumbo, K. Kayentao, A. Ongoiba, B. Traore, I.

- 1012 Sanz, S. K. Pierce, P. D. Crompton, Malaria-associated atypical memory B cells exhibit  
1013 markedly reduced B cell receptor signaling and effector function. *eLife* **4**, 1748 (2015).
- 1014 24. R. T. Sullivan, C. C. Kim, M. F. Fontana, M. E. Feeney, P. Jagannathan, M. J. Boyle, C. J.  
1015 Drakeley, I. Ssewanyana, F. Nankya, H. Mayanja-Kizza, G. Dorsey, B. Greenhouse, J.  
1016 Langhorne, Ed. FCRL5 Delineates Functionally Impaired Memory B Cells Associated with  
1017 *Plasmodium falciparum* Exposure. *PLoS pathogens* **11**, e1004894 (2015).
- 1018 25. X. Han, J. Yang, Y. Zhang, Y. Zhang, H. Cao, Y. Cao, Z. Qi, Potential Role for Regulatory B  
1019 Cells as a Major Source of Interleukin-10 in Spleen from *Plasmodium chabaudi*-Infected Mice.  
1020 *Infect Immun* **86**, e00016-18 (2018).
- 1021 26. X. He, L. Xia, K. C. Tumas, J. Wu, X.-Z. Su, Type I Interferons and Malaria: A Double-  
1022 Edge Sword Against a Complex Parasitic Disease. *Front Cell Infect Mi* **10**, 594621 (2020).
- 1023 27. T. M. Tran, R. Guha, S. Portugal, J. Skinner, A. Ongoiba, J. Bhardwaj, M. Jones, J. Moebius,  
1024 P. Venepally, S. Doumbo, E. A. DeRiso, S. Li, K. Vijayan, S. L. Anzick, G. T. Hart, E. M.  
1025 O'Connell, O. K. Doumbo, A. Kaushansky, G. Alter, P. L. Felgner, H. Lorenzi, K. Kayentao, B.  
1026 Traore, E. F. Kirkness, P. D. Crompton, A Molecular Signature in Blood Reveals a Role for p53  
1027 in Regulating Malaria-Induced Inflammation. *Immunity* , 1–27 (2019).
- 1028 28. S. W. Kazer, T. P. Aicher, D. M. Muema, S. L. Carroll, J. Ordovas-Montanes, V. N. Miao,  
1029 A. A. Tu, C. G. K. Ziegler, S. K. Nyquist, E. B. Wong, N. Ismail, M. Dong, A. Moodley, B.  
1030 Berger, J. C. Love, K. L. Dong, A. Leslie, Z. M. Ndhlovu, T. Ndung'u, B. D. Walker, A. K.  
1031 Shalek, Integrated single-cell analysis of multicellular immune dynamics during hyperacute  
1032 HIV-1 infection. *Nat Med* **26**, 511–518 (2020).
- 1033 29. Co.-19 M. B. At. (COMBAT) Consortium, D. J. Ahern, Z. Ai, M. Ainsworth, C. Allan, A.  
1034 Allcock, B. Angus, M. A. Ansari, C. V. Arancibia-Cárcamo, D. Aschenbrenner, M. Attar, J. K.

1035 Baillie, E. Barnes, R. Bashford-Rogers, A. Bashyal, S. Beer, G. Berridge, A. Beveridge, S. Bibi,  
1036 T. Bicanic, L. Blackwell, P. Bowness, A. Brent, A. Brown, J. Broxholme, D. Buck, K. L.  
1037 Burnham, H. Byrne, S. Camara, I. C. Ferreira, P. Charles, W. Chen, Y.-L. Chen, A. Chong, E. A.  
1038 Clutterbuck, M. Coles, C. P. Conlon, R. Cornall, A. P. Cribbs, F. Curion, E. E. Davenport, N.  
1039 Davidson, S. Davis, C. A. Dendrou, J. Dequaire, L. Dib, J. Docker, C. Dold, T. Dong, D.  
1040 Downes, H. Drakesmith, S. J. Dunachie, D. A. Duncan, C. Eijsbouts, R. Esnouf, A. Espinosa, R.  
1041 Etherington, B. Fairfax, R. Fairhead, H. Fang, S. Fassih, S. Felle, M. F. Mendoza, R. Ferreira, R.  
1042 Fischer, T. Foord, A. Forrow, J. Frater, A. Fries, V. G. Sanchez, L. C. Garner, C. Geeves, D.  
1043 Georgiou, L. Godfrey, T. Golubchik, M. G. Vazquez, A. Green, H. Harper, H. A. Harrington, R.  
1044 Heilig, S. Hester, J. Hill, C. Hinds, C. Hird, L.-P. Ho, R. Hoekzema, B. Hollis, J. Hughes, P.  
1045 Hutton, M. A. Jackson-Wood, A. Jainarayanan, A. James-Bott, K. Jansen, K. Jeffery, E. Jones,  
1046 L. Jostins, G. Kerr, D. Kim, P. Klenerman, J. C. Knight, V. Kumar, P. K. Sharma, P. Kurupati,  
1047 A. Kwok, A. Lee, A. Linder, T. Lockett, L. Lonie, M. Lopopolo, M. Lukoseviciute, J. Luo, S.  
1048 Marinou, B. Marsden, J. Martinez, P. C. Matthews, M. Mazurczyk, S. McGowan, S. McKechnie,  
1049 A. Mead, A. J. Mentzer, Y. Mi, C. Monaco, R. Montadon, G. Napolitani, I. Nassiri, A. Novak,  
1050 D. P. O'Brien, D. O'Connor, D. O'Donnell, G. Ogg, L. Overend, I. Park, I. Pavord, Y. Peng, F.  
1051 Penkava, M. P. Pinho, E. Perez, A. J. Pollard, F. Powrie, B. Psaila, T. P. Quan, E. Repapi, S.  
1052 Revale, L. Silva-Reyes, J.-B. Richard, C. Rich-Griffin, T. Ritter, C. S. Rollier, M. Rowland, F.  
1053 Ruehle, M. Salio, S. N. Sansom, R. S. Peres, A. S. Delgado, T. Sauka-Spengler, R.  
1054 Schwessinger, G. Scozzafava, G. Screatton, A. Seigal, M. G. Semple, M. Sergeant, C. S. Karali,  
1055 D. Sims, D. Skelly, H. Slawinski, A. Sobrinodiaz, N. Sousos, L. Stafford, L. Stockdale, M.  
1056 Strickland, O. Sumray, B. Sun, C. Taylor, S. Taylor, A. Taylor, S. Thongjuea, H. Thraves, J. A.  
1057 Todd, A. Tomic, O. Tong, A. Trebes, D. Trzuppek, F. A. Tucci, L. Turtle, I. Udalova, H. Uhlig, E.

1058 van Grinsven, I. Vendrell, M. Verheul, A. Voda, G. Wang, L. Wang, D. Wang, P. Watkinson, R.  
1059 Watson, M. Weinberger, J. Whalley, L. Witty, K. Wray, L. Xue, H. Y. Yeung, Z. Yin, R. K.  
1060 Young, J. Youngs, P. Zhang, Y.-X. Zurke, A blood atlas of COVID-19 defines hallmarks of  
1061 disease severity and specificity. *Cell* **185**, 916-938.e58 (2022).

1062 30. N. Liu, C. Jiang, P. Cai, Z. Shen, W. Sun, H. Xu, M. Fang, X. Yao, L. Zhu, X. Gao, J. Fang,  
1063 J. Lin, C. Guo, K. Qu, Single-cell analysis of COVID-19, sepsis, and HIV infection reveals  
1064 hyperinflammatory and immunosuppressive signatures in monocytes. *Cell Reports* , 109793  
1065 (2021).

1066 31. L. Zhu, P. Yang, Y. Zhao, Z. Zhuang, Z. Wang, R. Song, J. Zhang, C. Liu, Q. Gao, Q. Xu, X.  
1067 Wei, H.-X. Sun, B. Ye, Y. Wu, N. Zhang, G. Lei, L. Yu, J. Yan, G. Diao, F. Meng, C. Bai, P.  
1068 Mao, Y. Yu, M. Wang, Y. Yuan, Q. Deng, Z. Li, Y. Huang, G. Hu, Y. Liu, X. Wang, Z. Xu, P.  
1069 Liu, Y. Bi, Y. Shi, S. Zhang, Z. Chen, J. Wang, X. Xu, G. Wu, F.-S. Wang, G. F. Gao, L. Liu,  
1070 W. J. Liu, Single-Cell Sequencing of Peripheral Mononuclear Cells Reveals Distinct Immune  
1071 Response Landscapes of COVID-19 and Influenza Patients. *Immunity* **53**, 685-696.e3 (2020).

1072 32. E. Real, V. M. Howick, F. A. Dahalan, K. Witmer, J. Cudini, C. Andradi-Brown, J. Blight,  
1073 M. S. Davidson, S. K. Dogga, A. J. Reid, J. Baum, M. K. N. Lawniczak, A single-cell atlas of  
1074 *Plasmodium falciparum* transmission through the mosquito. *Nat Commun* **12**, 3196 (2021).

1075 33. A. J. Reid, A. M. Talman, H. M. Bennett, A. R. Gomes, M. J. Sanders, C. J. R. Illingworth,  
1076 O. Billker, M. Berriman, M. K. Lawniczak, Single-cell RNA-seq reveals hidden transcriptional  
1077 variation in malaria parasites. *Elife* **7**, e33105 (2018).

1078 34. A. Poran, C. Nötzel, O. Aly, N. Mencia-Trinchant, C. T. Harris, M. L. Guzman, D. C.  
1079 Hassane, O. Elemento, B. F. C. Kafsack, Single-cell RNA sequencing reveals a signature of  
1080 sexual commitment in malaria parasites. *Nature* **551**, 95–99 (2017).

- 1081 35. J. R. Loughland, G. Minigo, D. S. Sarovich, M. Field, P. E. Tipping, M. M. de Oca, K. A.  
1082 Piera, F. H. Amante, B. E. Barber, M. J. Grigg, T. William, M. F. Good, D. L. Doolan, C. R.  
1083 Engwerda, N. M. Anstey, J. S. McCarthy, T. Woodberry, Plasmacytoid dendritic cells appear  
1084 inactive during sub-microscopic Plasmodium falciparum blood-stage infection, yet retain their  
1085 ability to respond to TLR stimulation. *Scientific Reports* **7**, 2 (2017).
- 1086 36. K. Namba, M. Nishio, K. Mori, N. Miyamoto, M. Tsurudome, M. Ito, M. Kawano, A.  
1087 Uchida, Y. Ito, Involvement of ADAM9 in Multinucleated Giant Cell Formation of Blood  
1088 Monocytes. *Cell Immunol* **213**, 104–113 (2001).
- 1089 37. S. Wang, R. Song, Z. Wang, Z. Jing, S. Wang, J. Ma, S100A8/A9 in Inflammation. *Front*  
1090 *Immunol* **9**, 1298 (2018).
- 1091 38. M. Reyes, M. R. Filbin, R. P. Bhattacharyya, K. Billman, T. Eisenhaure, D. T. Hung, B. D.  
1092 Levy, R. M. Baron, P. C. Blainey, M. B. Goldberg, N. Hacohen, An immune-cell signature of  
1093 bacterial sepsis. *Nature medicine* , 1–26 (2020).
- 1094 39. T. Liu, L. Zhang, D. Joo, S.-C. Sun, NF- $\kappa$ B signaling in inflammation. *Signal Transduct*  
1095 *Target Ther* **2**, 17023 (2017).
- 1096 40. C. Arama, P. Giusti, S. Boström, V. Dara, B. Traore, A. Dolo, O. Doumbo, S. Varani, M.  
1097 Troye-Blomberg, Interethnic Differences in Antigen-Presenting Cell Activation and TLR  
1098 Responses in Malian Children during Plasmodium falciparum Malaria. *Plos One* **6**, e18319  
1099 (2011).
- 1100 41. B. C. Urban, D. Cordery, M. J. Shafi, P. C. Bull, C. I. Newbold, T. N. Williams, K. Marsh,  
1101 The Frequency of BDCA3-Positive Dendritic Cells Is Increased in the Peripheral Circulation of  
1102 Kenyan Children with Severe Malaria. *Infect Immun* **74**, 6700–6706 (2006).

- 1103 42. T. J. Suscovich, J. K. Fallon, J. Das, A. R. Demas, J. Crain, C. H. Linde, A. Michell, H.  
1104 Natarajan, C. Arevalo, T. Broge, T. Linnekin, V. Kulkarni, R. Lu, M. D. Slein, C. Luedemann,  
1105 M. Marquette, S. March, J. Weiner, S. Gregory, M. Coccia, Y. Flores-Garcia, F. Zavala, M. E.  
1106 Ackerman, E. Bergmann-Leitner, J. Hendriks, J. Sadoff, S. Dutta, S. N. Bhatia, D. A.  
1107 Lauffenburger, E. Jongert, U. Wille-Reece, G. Alter, Mapping functional humoral correlates of  
1108 protection against malaria challenge following RTS,S/AS01 vaccination. *Sci Transl Med* **12**,  
1109 eabb4757 (2020).
- 1110 43. A. M. Minassian, S. E. Silk, J. R. Barrett, C. M. Nielsen, K. Miura, A. Diouf, C. Loos, J. K.  
1111 Fallon, A. R. Michell, M. T. White, N. J. Edwards, I. D. Poulton, C. H. Mitton, R. O. Payne, M.  
1112 Marks, H. Maxwell-Scott, A. Querol-Rubiera, K. Bisnauthsing, R. Batra, T. Ogrina, N. J.  
1113 Brendish, Y. Themistocleous, T. A. Rawlinson, K. J. Ellis, D. Quinkert, M. Baker, R. L. Ramon,  
1114 F. R. Lopez, L. Barfod, P. M. Folegatti, D. Silman, M. Dato, I. J. Taylor, J. Jin, D. Pulido, A. D.  
1115 Douglas, W. A. de Jongh, R. Smith, E. Berrie, A. R. Noe, C. L. Diggs, L. A. Soisson, R.  
1116 Ashfield, S. N. Faust, A. L. Goodman, A. M. Lawrie, F. L. Nugent, G. Alter, C. A. Long, S. J.  
1117 Draper, Reduced blood-stage malaria growth and immune correlates in humans following RH5  
1118 vaccination. *Med* (2021), doi:10.1016/j.medj.2021.03.014.
- 1119 44. J. Tan, H. Cho, T. Pholcharee, L. S. Pereira, S. Doumbo, D. Doumtabe, B. J. Flynn, A.  
1120 Schön, S. Kanatani, S. O. Aylor, D. Oyen, R. Vistein, L. Wang, M. Dillon, J. Skinner, M.  
1121 Peterson, S. Li, A. H. Idris, A. Molina-Cruz, M. Zhao, L. R. Olano, P. J. Lee, A. Roth, P. Sinnis,  
1122 C. Barillas-Mury, K. Kayentao, A. Ongoiba, J. R. Francica, B. Traore, I. A. Wilson, R. A. Seder,  
1123 P. D. Crompton, Functional human IgA targets a conserved site on malaria sporozoites. *Sci*  
1124 *Transl Med* **13**, eabg2344 (2021).

- 1125 45. C. Fernandez-Arias, J. P. Lopez, J. N. Hernandez-Perez, M. D. Bautista-Ojeda, O. Branch, A.  
1126 Rodriguez, Malaria Inhibits Surface Expression of Complement Receptor 1 in  
1127 Monocytes/Macrophages, Causing Decreased Immune Complex Internalization. *J Immunol* **190**,  
1128 3363–3372 (2013).
- 1129 46. M. Roederer, J. L. Nozzi, M. C. Nason, SPICE: Exploration and analysis of post-cytometric  
1130 complex multivariate datasets. *Cytom Part A* **79A**, 167–174 (2011).
- 1131 47. D. S. Korbel, K. C. Newman, C. R. Almeida, D. M. Davis, E. M. Riley, Heterogeneous  
1132 Human NK Cell Responses to Plasmodium falciparum-Infected Erythrocytes. *J Immunol* **175**,  
1133 7466–7473 (2005).
- 1134 48. K. Artavanis-Tsakonas, E. M. Riley, Innate Immune Response to Malaria: Rapid Induction  
1135 of IFN- $\gamma$  from Human NK Cells by Live Plasmodium falciparum-Infected Erythrocytes. *J*  
1136 *Immunol* **169**, 2956–2963 (2002).
- 1137 49. M. B. B. McCall, M. Roestenberg, I. Ploemen, A. Teirlinck, J. Hopman, Q. de Mast, A.  
1138 Dolo, O. K. Doumbo, A. Luty, A. J. A. M. van der Ven, C. C. Hermsen, R. W. Sauerwein,  
1139 Memory-like IFN- $\gamma$  response by NK cells following malaria infection reveals the crucial role of  
1140 T cells in NK cell activation by P. falciparum. *European journal of immunology* **40**, 3472–3477  
1141 (2010).
- 1142 50. G. T. Hart, T. M. Tran, J. Theorell, H. Schlums, G. Arora, S. Rajagopalan, A. D. J. Sangala,  
1143 K. J. Welsh, B. Traore, S. K. Pierce, P. D. Crompton, Y. T. Bryceson, E. O. Long, Adaptive NK  
1144 cells in people exposed to Plasmodium falciparum correlate with protection from malaria. *The*  
1145 *Journal of experimental medicine* **2**, jem.20181681-14 (2019).
- 1146 51. G. Arora, G. T. Hart, J. Manzella-Lapeira, J. Y. Doritchamou, D. L. Narum, L. M. Thomas,  
1147 J. Brzostowski, S. Rajagopalan, O. K. Doumbo, B. Traore, L. H. Miller, S. K. Pierce, P. E.



- 1148 Duffy, P. D. Crompton, S. A. Desai, E. O. Long, NK cells inhibit Plasmodium falciparum  
1149 growth in red blood cells via antibody-dependent cellular cytotoxicity. *Elife* **7**, e36806 (2018).
- 1150 52. C. Yang, J. R. Siebert, R. Burns, Z. J. Gerbec, B. Bonacci, A. Rymaszewski, M. Rau, M. J.  
1151 Riese, S. Rao, K.-S. Carlson, J. M. Routes, J. W. Verbsky, M. S. Thakar, S. Malarkannan,  
1152 Heterogeneity of human bone marrow and blood natural killer cells defined by single-cell  
1153 transcriptome. *Nat Commun* **10**, 3931 (2019).
- 1154 53. A. Pfefferle, H. Netskar, E. H. Ask, S. Lorenz, J. P. Goodridge, E. Sohlberg, T. Clancy, K.-J.  
1155 Malmberg, A Temporal Transcriptional Map of Human Natural Killer Cell Differentiation.  
1156 *Biorxiv* , 630657 (2019).
- 1157 54. W. Jiang, N. R. Chai, D. Maric, B. Bielekova, Unexpected Role for Granzyme K in  
1158 CD56bright NK Cell-Mediated Immunoregulation of Multiple Sclerosis. *J Immunol* **187**, 781–  
1159 790 (2011).
- 1160 55. S. L. Sague, C. Tato, E. Pur, C. A. Hunter, The Regulation and Activation of CD44 by  
1161 Natural Killer (NK) Cells and Its Role in the Production of IFN-. *J Interf Cytokine Res* **24**, 301–  
1162 309 (2004).
- 1163 56. L. F. de Andrade, Y. Lu, A. Luoma, Y. Ito, D. Pan, J. W. Pyrdol, C. H. Yoon, G.-C. Yuan, K.  
1164 W. Wucherpennig, Discovery of specialized NK cell populations infiltrating human melanoma  
1165 metastases. *Jci Insight* **4**, e133103 (2019).
- 1166 57. O. D’Orlando, F. Zhao, B. Kasper, Z. Orinska, J. Müller, I. Hermans-Borgmeyer, G. M.  
1167 Griffiths, U. Z. Stadt, S. Bulfone-Paus, Syntaxin 11 is required for NK and CD8<sup>+</sup> T-cell  
1168 cytotoxicity and neutrophil degranulation. *Eur J Immunol* **43**, 194–208 (2013).
- 1169 58. F. Ahmad, H. S. Hong, M. Jäckel, A. Jablonka, I.-N. Lu, N. Bhatnagar, J. M. Eberhard, B. A.  
1170 Bollmann, M. Ballmaier, M. Zielinska-Skowronek, R. E. Schmidt, D. Meyer-Olson, High

- 1171 Frequencies of Polyfunctional CD8<sup>+</sup> NK Cells in Chronic HIV-1 Infection Are Associated with  
1172 Slower Disease Progression. *J Virol* **88**, 12397–12408 (2014).
- 1173 59. T. Clemente, N. J. Vieira, J. P. Cerliani, C. Adrain, A. Luthi, M. R. Dominguez, M. Yon, F.  
1174 C. Barrence, T. B. Riul, R. D. Cummings, T. M. Zorn, S. Amigorena, M. Dias-Baruffi, M. M.  
1175 Rodrigues, S. J. Martin, G. A. Rabinovich, G. P. Amarante-Mendes, Proteomic and functional  
1176 analysis identifies galectin-1 as a novel regulatory component of the cytotoxic granule  
1177 machinery. *Cell Death Dis* **8**, e3176 (2017).
- 1178 60. R. M. Loftus, N. Assmann, N. Kedia-Mehta, K. L. O'Brien, A. Garcia, C. Gillespie, J. L.  
1179 Hukelmann, P. J. Oefner, A. I. Lamond, C. M. Gardiner, K. Dettmer, D. A. Cantrell, L. V.  
1180 Sinclair, D. K. Finlay, Amino acid-dependent cMyc expression is essential for NK cell metabolic  
1181 and functional responses in mice. *Nat Commun* **9**, 2341 (2018).
- 1182 61. H. Peng, R. Sun, L. Tang, H. Wei, Z. Tian, CD62L Is Critical for Maturation and  
1183 Accumulation of Murine Hepatic NK Cells in Response to Viral Infection. *J Immunol* **190**,  
1184 4255–4262 (2013).
- 1185 62. T. Aranami, S. Miyake, T. Yamamura, Differential Expression of CD11c by Peripheral  
1186 Blood NK Cells Reflects Temporal Activity of Multiple Sclerosis. *J Immunol* **177**, 5659–5667  
1187 (2006).
- 1188 63. J. Tsuda, W. Li, H. Yamanishi, H. Yamamoto, A. Okuda, S. Kubo, Z. Ma, N. Terada, Y.  
1189 Tanaka, H. Okamura, Involvement of CD56brightCD11c<sup>+</sup> Cells in IL-18–Mediated Expansion of  
1190 Human  $\gamma\delta$  T Cells. *J Immunol* **186**, 2003–2012 (2011).
- 1191 64. S. A. Erokhina, M. A. Streltsova, L. M. Kanevskiy, M. V. Grechikhina, A. M. Sapozhnikov,  
1192 E. I. Kovalenko, HLA-DR-expressing NK cells: Effective killers suspected for antigen  
1193 presentation. *J Leukocyte Biol* **109**, 327–337 (2021).

- 1194 65. A. H. Turaj, K. L. Cox, C. A. Penfold, R. R. French, C. I. Mockridge, J. E. Willoughby, A. L.  
1195 Tutt, J. Griffiths, P. W. M. Johnson, M. J. Glennie, R. Levy, M. S. Cragg, S. H. Lim,  
1196 Augmentation of CD134 (OX40)-dependent NK anti-tumour activity is dependent on antibody  
1197 cross-linking. *Sci Rep-uk* **8**, 2278 (2018).
- 1198 66. T. Baessler, J. E. Charton, B. J. Schmiedel, F. Grünebach, M. Krusch, A. Wacker, H.-G.  
1199 Rammensee, H. R. Salih, CD137 ligand mediates opposite effects in human and mouse NK cells  
1200 and impairs NK-cell reactivity against human acute myeloid leukemia cells. *Blood* **115**, 3058–  
1201 3069 (2010).
- 1202 67. B. Liu, Z. Li, S. P. Mahesh, S. Pantanelli, F. S. Hwang, W. O. Siu, R. B. Nussenblatt,  
1203 Glucocorticoid-induced Tumor Necrosis Factor Receptor Negatively Regulates Activation of  
1204 Human Primary Natural Killer (NK) Cells by Blocking Proliferative Signals and Increasing NK  
1205 Cell Apoptosis\*. *J Biol Chem* **283**, 8202–8210 (2008).
- 1206 68. S. Narayanan, P. J. Ahl, V. A. Bijin, N. Kaliaperumal, S. G. Lim, C.-I. Wang, A.-M.  
1207 Fairhurst, J. E. Connolly, LAG3 is a Central Regulator of NK Cell Cytokine Production. *Biorxiv*  
1208 , 2020.01.31.928200 (2020).
- 1209 69. L. C. Ndhlovu, S. Lopez-Vergès, J. D. Barbour, R. B. Jones, A. R. Jha, B. R. Long, E. C.  
1210 Schoeffler, T. Fujita, D. F. Nixon, L. L. Lanier, Tim-3 marks human natural killer cell  
1211 maturation and suppresses cell-mediated cytotoxicity. *Blood* **119**, 3734–3743 (2012).
- 1212 70. T. Lu, L. Chen, A. G. Mansour, M. J. Yu, N. Brooks, K.-Y. Teng, Z. Li, J. Zhang, T. Barr, J.  
1213 Yu, M. A. Caligiuri, Cbl-b Is Upregulated and Plays a Negative Role in Activated Human NK  
1214 Cells. *J Immunol* **206**, 677–685 (2021).

- 1215 71. A. J. Lee, F. Mian, S. M. Poznanski, M. Stackaruk, T. Chan, M. V. Chew, A. A. Ashkar,  
1216 Type I Interferon Receptor on NK Cells Negatively Regulates Interferon- $\gamma$  Production. *Front*  
1217 *Immunol* **10**, 1261 (2019).
- 1218 72. K. W. Dantzler, P. Jagannathan,  $\gamma\delta$  T Cells in Antimalarial Immunity: New Insights Into  
1219 Their Diverse Functions in Protection and Tolerance. *Front Immunol* **9**, 2445 (2018).
- 1220 73. C. Junqueira, R. B. Polidoro, G. Castro, S. Absalon, Z. Liang, S. S. Santara, Â. Crespo, D. B.  
1221 Pereira, R. T. Gazzinelli, J. D. Dvorin, J. Lieberman,  $\gamma\delta$  T cells suppress *Plasmodium falciparum*  
1222 blood-stage infection by direct killing and phagocytosis. *Nat Immunol* , 1–11 (2021).
- 1223 74. J. Howard, S. Loizon, C. J. Tyler, D. Duluc, B. Moser, M. Mechain, A. Duvignaud, D.  
1224 Malvy, M. Troye-Blomberg, J.-F. Moreau, M. Eberl, O. Mercereau-Puijalon, J. Déchanet-  
1225 Merville, C. Behr, M. Mamani-Matsuda, The Antigen-Presenting Potential of V $\gamma$ 9V $\delta$ 2 T Cells  
1226 During *Plasmodium falciparum* Blood-Stage Infection. *The Journal of infectious diseases* **215**,  
1227 1569–1579 (2017).
- 1228 75. P. Jagannathan, F. Lutwama, M. J. Boyle, F. Nankya, L. A. Farrington, T. I. McIntyre, K.  
1229 Bowen, K. Naluwu, M. Nalubega, K. Musinguzi, E. Sikyomu, R. Budker, A. Katureebe, J. Rek,  
1230 B. Greenhouse, G. Dorsey, M. R. Kanya, M. E. Feeney, V $\delta$ 2<sup>+</sup> T cell response to malaria  
1231 correlates with protection from infection but is attenuated with repeated exposure. *Scientific*  
1232 *Reports* **7**, 11487 (2017).
- 1233 76. L. A. Farrington, P. C. Callaway, H. M. Vance, K. Baskevitch, E. Lutz, L. Warriar, T. I.  
1234 McIntyre, R. Budker, P. Jagannathan, F. Nankya, K. Musinguzi, M. Nalubega, E. Sikyomu, K.  
1235 Naluwu, E. Arinaitwe, G. Dorsey, M. R. Kanya, M. E. Feeney, Opsonized antigen activates  
1236 V $\delta$ 2<sup>+</sup> T cells via CD16/FC $\gamma$ RIIIa in individuals with chronic malaria exposure. *Plos Pathog* **16**,  
1237 e1008997 (2020).

- 1238 77. L. Tan, A. S. Fichtner, E. Bruni, I. Odak, I. Sandrock, A. Bubke, A. Borchers, C. Schultze-  
1239 Florey, C. Koenecke, R. Förster, M. Jarek, C. von Kaisenberg, A. Schulz, X. Chu, B. Zhang, Y.  
1240 Li, U. Panzer, C. F. Krebs, S. Ravens, I. Prinz, A fetal wave of human type 3 effector  $\gamma\delta$  cells  
1241 with restricted TCR diversity persists into adulthood. *Sci Immunol* **6** (2021),  
1242 doi:10.1126/sciimmunol.abf0125.
- 1243 78. A. Takeuchi, M. E. S. G. Badr, K. Miyauchi, C. Ishihara, R. Onishi, Z. Guo, Y. Sasaki, H.  
1244 Ike, A. Takumi, N. M. Tsuji, Y. Murakami, T. Katakai, M. Kubo, T. Saito, CRTAM determines  
1245 the CD4<sup>+</sup> cytotoxic T lymphocyte lineage. *J Exp Med* **213**, 123–138 (2016).
- 1246 79. R. B. Damgaard, J. A. Walker, P. Marco-Casanova, N. V. Morgan, H. L. Titheradge, P. R.  
1247 Elliott, D. McHale, E. R. Maher, A. N. J. McKenzie, D. Komander, The Deubiquitinase  
1248 OTULIN Is an Essential Negative Regulator of Inflammation and Autoimmunity. *Cell* **166**,  
1249 1215-1230.e20 (2016).
- 1250 80. Z. Ortutay, A. Grönholm, M. Laitinen, M. Keresztes-Andrei, I. Hermelo, M. Pesu,  
1251 Identification of Novel Genetic Regulatory Region for Proprotein Convertase FURIN and  
1252 Interferon Gamma in T Cells. *Front Immunol* **12**, 630389 (2021).
- 1253 81. J. Zeng, X. Yang, L. Yang, W. Li, Y. Zheng, Thymosin  $\beta$ 10 promotes tumor-associated  
1254 macrophages M2 conversion and proliferation via the PI3K/Akt pathway in lung  
1255 adenocarcinoma. *Respir Res* **21**, 328 (2020).
- 1256 82. T. Suzuki, S. Minagawa, T. Yamazaki, T. Arai, M. Kanai, S. Shinjo, N. Goda, Loss of  
1257 hypoxia inducible factor-1 $\alpha$  aggravates  $\gamma\delta$  T-cell-mediated inflammation during  
1258 acetaminophen-induced liver injury. *Hepatology Commun* **2**, 571–581 (2018).
- 1259 83. M. Quigley, F. Pereyra, B. Nilsson, F. Porichis, C. Fonseca, Q. Eichbaum, B. Julg, J. L.  
1260 Jesneck, K. Brosnahan, S. Imam, K. Russell, I. Toth, A. Piechocka-Trocha, D. Dolfi, J.

- 1261 Angelosanto, A. Crawford, H. Shin, D. S. Kwon, J. Zupkosky, L. Francisco, G. J. Freeman, E. J.  
1262 Wherry, D. E. Kaufmann, B. D. Walker, B. Ebert, W. N. Haining, Transcriptional analysis of  
1263 HIV-specific CD8<sup>+</sup> T cells shows that PD-1 inhibits T cell function by upregulating BATF. *Nat*  
1264 *Med* **16**, 1147–1151 (2010).
- 1265 84. H. Hsu, S. Boudova, G. Mvula, T. H. Divala, D. Rach, R. G. Mungwira, F. Boldrin, G.  
1266 Degiacomi, R. Manganeli, M. K. Laufer, C. Cairo, Age-related changes in PD-1 expression  
1267 coincide with increased cytotoxic potential in V $\delta$ 2 T cells during infancy. *Cell Immunol* **359**,  
1268 104244 (2020).
- 1269 85. H. Hsu, S. Boudova, G. Mvula, T. H. Divala, R. G. Mungwira, C. Harman, M. K. Laufer, C.  
1270 D. Pauza, C. Cairo, Prolonged PD1 Expression on Neonatal V $\delta$ 2 Lymphocytes Dampens  
1271 Proinflammatory Responses: Role of Epigenetic Regulation. *J Immunol* **197**, 1884–1892 (2016).
- 1272 86. L. Schofield, L. J. Ioannidis, S. Karl, L. J. Robinson, Q. Y. Tan, D. P. Poole, I. Betuela, D. L.  
1273 Hill, P. M. Siba, D. S. Hansen, I. Mueller, E. M. Eriksson, Synergistic effect of IL-12 and IL-18  
1274 induces TIM3 regulation of  $\gamma\delta$  T cell function and decreases the risk of clinical malaria in  
1275 children living in Papua New Guinea. *Bmc Med* **15**, 114 (2017).
- 1276 87. V. Kunzmann, E. Kretzschmar, T. Herrmann, M. Wilhelm, Polyinosinic-polycytidylic  
1277 acid-mediated stimulation of human  $\gamma\delta$  T cells via CD11c<sup>+</sup> dendritic cell-derived type I  
1278 interferons. *Immunology* **112**, 369–377 (2004).
- 1279 88. S. P. Kurup, N. S. Butler, J. T. Harty, T cell-mediated immunity to malaria. *Nature reviews*.  
1280 *Immunology* **19**, 457–471 (2019).
- 1281 89. M. Locci, C. Havenar-Daughton, E. Landais, J. Wu, M. A. Kroenke, C. L. Arlehamn, L. F.  
1282 Su, R. Cubas, M. M. Davis, A. Sette, E. K. Haddad, P. Pognard, S. Crotty, Human Circulating

- 1283 PD-1<sup>+</sup>CXCR3-CXCR5<sup>+</sup> Memory Tfh Cells Are Highly Functional and Correlate with Broadly  
1284 Neutralizing HIV Antibody Responses. *Immunity* **39**, 758–769 (2013).
- 1285 90. C. M. Radens, D. Blake, P. Jewell, Y. Barash, K. W. Lynch, Meta-analysis of transcriptomic  
1286 variation in T-cell populations reveals both variable and consistent signatures of gene expression  
1287 and splicing. *Rna* **26**, 1320–1333 (2020).
- 1288 91. M. P. Gallagher, J. M. Conley, P. Vangala, M. Garber, A. Reboldi, L. J. Berg, Hierarchy of  
1289 signaling thresholds downstream of the T cell receptor and the Tec kinase ITK. *Proc National*  
1290 *Acad Sci* **118**, e2025825118 (2021).
- 1291 92. M. G. Roncarolo, S. Gregori, R. Bacchetta, M. Battaglia, N. Gagliani, The Biology of T  
1292 Regulatory Type 1 Cells and Their Therapeutic Application in Immune-Mediated Diseases.  
1293 *Immunity* **49**, 1004–1019 (2018).
- 1294 93. A. C. Anderson, N. Joller, V. K. Kuchroo, Lag-3, Tim-3, and TIGIT: Co-inhibitory  
1295 Receptors with Specialized Functions in Immune Regulation. *Immunity* **44**, 989–1004 (2016).
- 1296 94. S. Yang, J. Wang, D. D. Brand, S. G. Zheng, Role of TNF–TNF Receptor 2 Signal in  
1297 Regulatory T Cells and Its Therapeutic Implications. *Front Immunol* **9**, 784 (2018).
- 1298 95. T. So, S.-W. Lee, M. Croft, Immune regulation and control of regulatory T cells by OX40  
1299 and 4-1BB. *Cytokine Growth F R* **19**, 253–262 (2008).
- 1300 96. R. A. Zander, R. Vijay, A. D. Pack, J. J. Guthmiller, A. C. Graham, S. E. Lindner, A. M.  
1301 Vaughan, S. H. I. Kappe, N. S. Butler, Th1-like Plasmodium-Specific Memory CD4<sup>+</sup> T Cells  
1302 Support Humoral Immunity. *Cell Reports* **21**, 1839–1852 (2017).
- 1303 97. S. Ronchetti, E. Ricci, M. G. Petrillo, L. Cari, G. Migliorati, G. Nocentini, C. Riccardi,  
1304 Glucocorticoid-Induced Tumour Necrosis Factor Receptor-Related Protein: A Key Marker of  
1305 Functional Regulatory T Cells. *J Immunol Res* **2015**, 171520 (2015).

- 1306 98. S. J. Patterson, A. M. Pesenacker, A. Y. Wang, J. Gillies, M. Mojibian, K. Morishita, R. Tan,  
1307 T. J. Kieffer, C. B. Verchere, C. Panagiotopoulos, M. K. Levings, T regulatory cell chemokine  
1308 production mediates pathogenic T cell attraction and suppression. *J Clin Invest* **126**, 1039–1051  
1309 (2016).
- 1310 99. M. L. Ridley, V. Fleskens, C. A. Roberts, S. Lalnunhlimi, A. Alnesf, A. M. O’Byrne, K. J. A.  
1311 Steel, G. A. M. Povoleri, J. Sumner, P. Lavender, L. S. Taams, IKZF3/Aiolos Is Associated with  
1312 but Not Sufficient for the Expression of IL-10 by CD4<sup>+</sup> T Cells. *J Immunol* **204**, ji1901283  
1313 (2020).
- 1314 100. C. Schmidl, L. Hansmann, T. Lassmann, P. J. Balwierz, H. Kawaji, M. Itoh, J. Kawai, S.  
1315 Nagao-Sato, H. Suzuki, R. Andreesen, Y. Hayashizaki, A. R. R. Forrest, P. Carninci, P.  
1316 Hoffmann, M. Edinger, M. Rehli, F. consortium, The enhancer and promoter landscape of  
1317 human regulatory and conventional T-cell subpopulations. *Blood* **123**, e68–e78 (2014).
- 1318 101. F. Meiler, J. Zumkehr, S. Klunker, B. Rückert, C. A. Akdis, M. Akdis, In vivo switch to  
1319 IL-10–secreting T regulatory cells in high dose allergen exposure. *J Exp Medicine* **205**, 2887–  
1320 2898 (2008).
- 1321 102. L. Gabryšová, M. Alvarez-Martinez, R. Luisier, L. S. Cox, J. Sodenkamp, C. Hosking, D.  
1322 Pérez-Mazliah, C. Whicher, Y. Kannan, K. Potempa, X. Wu, L. Bhaw, H. Wende, M. H.  
1323 Sieweke, G. Elgar, M. Wilson, J. Briscoe, V. Metzis, J. Langhorne, N. M. Luscombe, A.  
1324 O’Garra, c-Maf controls immune responses by regulating disease-specific gene networks and  
1325 repressing IL-2 in CD4<sup>+</sup> T cells. *Nat Immunol* **19**, 497–507 (2018).
- 1326 103. M. M. de Oca, R. Kumar, F. de L. Rivera, F. H. Amante, M. Sheel, R. J. Faleiro, P. T.  
1327 Bunn, S. E. Best, L. Beattie, S. S. Ng, C. L. Edwards, W. Muller, E. Cretney, S. L. Nutt, M. J.  
1328 Smyth, A. Haque, G. R. Hill, S. Sundar, A. Kallies, C. R. Engwerda, Blimp-1-Dependent IL-10



- 1329 Production by Tr1 Cells Regulates TNF-Mediated Tissue Pathology. *Plos Pathog* **12**, e1005398  
1330 (2016).
- 1331 104. Y. Wang, F. Rivera, C. Edwards, T. Frame, J. A. Engel, L. Bukali, J. Na, S. Ng, D. Corvino,  
1332 M. M. de Oca, P. Bunn, M. Soon, D. Andrew, J. Loughland, F. Amante, B. Barber, J. S.  
1333 McCarthy, J. A. Lopez, M. J. Boyle, C. Engwerda, STING activation promotes autologous type I  
1334 interferon-dependent development of type 1 regulatory T cells during malaria. ,  
1335 2022.09.04.506109 (2022).
- 1336 105. B. U. Schraml, K. Hildner, W. Ise, W.-L. Lee, W. A.-E. Smith, B. Solomon, G. Sahota, J.  
1337 Sim, R. Mukasa, S. Cemerski, R. D. Hatton, G. D. Stormo, C. T. Weaver, J. H. Russell, T. L.  
1338 Murphy, K. M. Murphy, The AP-1 transcription factor Batf controls TH17 differentiation.  
1339 *Nature* **460**, 405–409 (2009).
- 1340 106. W. Ise, M. Kohyama, B. U. Schraml, T. Zhang, B. Schwer, U. Basu, F. W. Alt, J. Tang, E.  
1341 M. Oltz, T. L. Murphy, K. M. Murphy, The transcription factor BATF controls the global  
1342 regulators of class-switch recombination in both B cells and T cells. *Nat Immunol* **12**, 536–543  
1343 (2011).
- 1344 107. M. S. F. Soon, M. Nalubega, M. J. Boyle, T-follicular helper cells in malaria infection and  
1345 roles in antibody induction. *Oxf Open Immunol* **2**, iqab008- (2021).
- 1346 108. Damian. A. Oyong, Jessica. R. Loughland, Megan. S. F. Soon, J.-A. Chan, D. Andrew, B.  
1347 D. Wines, P. M. Hogarth, S. D. Olver, A. D. Collinge, A. Varelias, J. G. Beeson, E. Kenangalem,  
1348 R. N. Price, N. M. Anstey, G. Minigo, M. J. Boyle, Adults with Plasmodium falciparum malaria  
1349 have higher magnitude and quality of circulating T-follicular helper cells compared to children.  
1350 *Ebiomedicine* **75**, 103784 (2022).

- 1351 109. J.-A. Chan, J. R. Loughland, F. de L. Rivera, A. SheelaNair, D. W. Andrew, N. L. Dooley,  
1352 B. D. Wines, F. H. Amante, L. Webb, P. M. Hogarth, J. S. McCarthy, J. G. Beeson, C. R.  
1353 Engwerda, M. J. Boyle, Th2-like T Follicular Helper Cells Promote Functional Antibody  
1354 Production during Plasmodium falciparum Infection. *Cell Reports Medicine* **1**, 100157 (2020).
- 1355 110. N. Obeng-Adjei, S. Portugal, T. M. Tran, T. B. Yazew, J. Skinner, S. Li, A. Jain, P. L.  
1356 Felgner, O. K. Doumbo, K. Kayentao, A. Ongoiba, B. Traore, P. D. Crompton, Circulating Th1-  
1357 Cell-type Tfh Cells that Exhibit Impaired B Cell Help Are Preferentially Activated during Acute  
1358 Malaria in Children. *CellReports* **13**, 425–439 (2015).
- 1359 111. C. J. Kim, C.-G. Lee, J.-Y. Jung, A. Ghosh, S. N. Hasan, S.-M. Hwang, H. Kang, C. Lee,  
1360 G.-C. Kim, D. Rudra, C.-H. Suh, S.-H. Im, The Transcription Factor Ets1 Suppresses T  
1361 Follicular Helper Type 2 Cell Differentiation to Halt the Onset of Systemic Lupus  
1362 Erythematosus. *Immunity* **49**, 1034-1048.e8 (2018).
- 1363 112. D. Pham, C. E. Moseley, M. Gao, D. Savic, C. J. Winstead, M. Sun, B. L. Kee, R. M.  
1364 Myers, C. T. Weaver, R. D. Hatton, Batf Pioneers the Reorganization of Chromatin in  
1365 Developing Effector T Cells via Ets1-Dependent Recruitment of Ctcf. *Cell Reports* **29**, 1203-  
1366 1220.e7 (2019).
- 1367 113. T. Chinen, A. K. Kannan, A. G. Levine, X. Fan, U. Klein, Y. Zheng, G. Gasteiger, Y. Feng,  
1368 J. D. Fontenot, A. Y. Rudensky, An essential role for the IL-2 receptor in Treg cell function. *Nat*  
1369 *Immunol* **17**, 1322–1333 (2016).
- 1370 114. S. Cohen, I. A. McGregor, S. Carrington, Gamma-globulin and acquired immunity to  
1371 human malaria. *Nature* **192**, 733–737 (1961).
- 1372 115. H. J. Sutton, R. Aye, A. H. Idris, R. Vistein, E. Nduati, O. Kai, J. Mwacharo, X. Li, X. Gao,  
1373 T. D. Andrews, M. Koutsakos, T. H. O. Nguyen, M. Nekrasov, P. Milburn, A. Eltahla, A. A.

- 1374 Berry, N. KC, S. Chakravarty, B. K. L. Sim, A. K. Wheatley, S. J. Kent, S. L. Hoffman, K. E.  
1375 Lyke, P. Bejon, F. Luciani, K. Kedzierska, R. A. Seder, F. M. Ndungu, I. A. Cockburn, Atypical  
1376 B cells are part of an alternative lineage of B cells that participates in responses to vaccination  
1377 and infection in humans. *Cell Reports* **34**, 108684 (2021).
- 1378 116. C. C. Kim, A. M. Baccarella, A. Bayat, M. Pepper, M. F. Fontana, FCRL5<sup>+</sup> Memory B  
1379 Cells Exhibit Robust Recall Responses. *CellReports* **27**, 1446-1460.e4 (2019).
- 1380 117. C. S. Hopp, J. Skinner, S. L. Anzick, C. M. Tipton, M. E. Peterson, S. Li, S. Doumbo, K.  
1381 Kayentao, A. Ongoiba, C. Martens, B. Traore, P. D. Crompton, Atypical B cells up-regulate  
1382 costimulatory molecules during malaria and secrete antibodies with T follicular helper cell  
1383 support. *Sci Immunol* **7**, eabn1250 (2022).
- 1384 118. F. Horns, C. L. Dekker, S. R. Quake, Memory B Cell Activation, Broad Anti-influenza  
1385 Antibodies, and Bystander Activation Revealed by Single-Cell Transcriptomics. *CellReports* **30**,  
1386 905-913.e6 (2020).
- 1387 119. A. H. Ellebedy, K. J. L. Jackson, H. T. Kissick, H. I. Nakaya, C. W. Davis, K. M. Roskin,  
1388 A. K. McElroy, C. M. Oshansky, R. Elbein, S. Thomas, G. M. Lyon, C. F. Spiropoulou, A. K.  
1389 Mehta, P. G. Thomas, S. D. Boyd, R. Ahmed, Defining antigen-specific plasmablast and  
1390 memory B cell subsets in human blood after viral infection or vaccination. *Nat Immunol* **17**,  
1391 1226–1234 (2016).
- 1392 120. B. J. Schmiedel, D. Singh, A. Madrigal, A. G. Valdovino-Gonzalez, B. M. White, J.  
1393 Zapardiel-Gonzalo, B. Ha, G. Altay, J. A. Greenbaum, G. McVicker, G. Seumois, A. Rao, M.  
1394 Kronenberg, B. Peters, P. Vijayanand, Impact of Genetic Polymorphisms on Human Immune  
1395 Cell Gene Expression. *Cell* **175**, 1701-1715.e16 (2018).

- 1396 121. G. Monaco, B. Lee, W. Xu, S. Mustafah, Y. Y. Hwang, C. Carré, N. Burdin, L. Visan, M.  
1397 Ceccarelli, M. Poidinger, A. Zippelius, J. P. de Magalhães, A. Larbi, RNA-Seq Signatures  
1398 Normalized by mRNA Abundance Allow Absolute Deconvolution of Human Immune Cell  
1399 Types. *Cell Reports* **26**, 1627-1640.e7 (2019).
- 1400 122. R. T. Sullivan, I. Ssewanyana, S. Wamala, F. Nankya, P. Jagannathan, J. W. Tappero, H.  
1401 Mayanja-Kizza, M. K. Muhindo, E. Arinaitwe, M. Kanya, G. Dorsey, M. E. Feeney, E. M.  
1402 Riley, C. J. Drakeley, B. Greenhouse, R. Sullivan, B cell sub-types following acute malaria and  
1403 associations with clinical immunity. *Malaria J* **15**, 139 (2016).
- 1404 123. E. Nduati, A. Gwela, H. Karanja, C. Mugenyi, J. Langhorne, K. Marsh, B. C. Urban, The  
1405 Plasma Concentration of the B Cell Activating Factor Is Increased in Children With Acute  
1406 Malaria. *J Infect Dis* **204**, 962–970 (2011).
- 1407 124. R. Vijay, J. J. Guthmiller, A. J. Sturtz, F. A. Surette, K. J. Rogers, R. R. Sompallae, F. Li,  
1408 R. L. Pope, J.-A. Chan, F. de L. Rivera, D. Andrew, L. Webb, W. J. Maury, H.-H. Xue, C. R.  
1409 Engwerda, J. S. McCarthy, M. J. Boyle, N. S. Butler, Infection-induced plasmablasts are a  
1410 nutrient sink that impairs humoral immunity to malaria. *Nat Immunol* **21**, 790–801 (2020).
- 1411 125. J. Jellusova, Metabolic control of B cell immune responses. *Curr Opin Immunol* **63**, 21–28  
1412 (2020).
- 1413 126. N. Wu, B. Zheng, A. Shaywitz, Y. Dagon, C. Tower, G. Bellinger, C.-H. Shen, J. Wen, J.  
1414 Asara, T. E. McGraw, B. B. Kahn, L. C. Cantley, AMPK-Dependent Degradation of TXNIP  
1415 upon Energy Stress Leads to Enhanced Glucose Uptake via GLUT1. *Mol Cell* **49**, 1167–1175  
1416 (2013).

- 1417 127. P. Patwari, W. A. Chutkow, K. Cummings, V. L. R. M. Verstraeten, J. Lammerding, E. R.  
1418 Schreiter, R. T. Lee, Thioredoxin-independent Regulation of Metabolism by the  $\alpha$ -Arrestin  
1419 Proteins\*. *J Biol Chem* **284**, 24996–25003 (2009).
- 1420 128. D. Medgyesi, E. Hobeika, R. Biesen, F. Kollert, A. Taddeo, R. E. Voll, F. Hiepe, M. Reth,  
1421 The protein tyrosine phosphatase PTP1B is a negative regulator of CD40 and BAFF-R signaling  
1422 and controls B cell autoimmunity. *J Exp Medicine* **211**, 427–440 (2014).
- 1423 129. T. Ono, S. Sonta, T. Tetsuka, H. Uranishi, H. Imai, N. Takahashi, K. Asamitsu, T.  
1424 Okamoto, Inhibition of Nuclear Factor- $\kappa$ B-mediated Transcription by Association with the  
1425 Amino-terminal Enhancer of Split, a Groucho-related Protein Lacking WD40 Repeats\*. *J Biol*  
1426 *Chem* **275**, 4383–4390 (2000).
- 1427 130. Y. Sasaki, K. Iwai, B Cell Receptor Signaling. *Curr Top Microbiol* **393**, 177–209 (2015).
- 1428 131. X. Meng, B. Grötsch, Y. Luo, K. X. Knaup, M. S. Wiesener, X.-X. Chen, J. Jantsch, S.  
1429 Fillatreau, G. Schett, A. Bozec, Hypoxia-inducible factor-1 $\alpha$  is a critical transcription factor for  
1430 IL-10-producing B cells in autoimmune disease. *Nat Commun* **9**, 251 (2018).
- 1431 132. M. C. Glass, D. R. Glass, J.-P. Oliveria, B. Mbiribindi, C. O. Esquivel, S. M. Krams, S. C.  
1432 Bendall, O. M. Martinez, Human IL-10-producing B cells have diverse states that are induced  
1433 from multiple B cell subsets. *Cell Reports* **39**, 110728 (2022).
- 1434 133. Y. Liu, Y. Chen, Z. Li, Y. Han, Y. Sun, Q. Wang, B. Liu, Z. Su, Role of IL-10-producing  
1435 regulatory B cells in control of cerebral malaria in *Plasmodium berghei* infected mice. *Eur J*  
1436 *Immunol* **43**, 2907–2918 (2013).
- 1437 134. M. Reyes, M. R. Filbin, R. P. Bhattacharyya, A. Sonny, A. Mehta, K. Billman, K. R. Kays,  
1438 M. Pinilla-Vera, M. E. Benson, L. A. Cosimi, D. T. Hung, B. D. Levy, A.-C. Villani, M. Sade-  
1439 Feldman, R. M. Baron, M. B. Goldberg, P. C. Blainey, N. Hacohen, Plasma from patients with

- 1440 bacterial sepsis or severe COVID-19 induces suppressive myeloid cell production from  
1441 hematopoietic progenitors in vitro. *Sci Transl Med* **13**, eabe9599 (2021).
- 1442 135. W. Nahrendorf, A. Ivens, P. J. Spence, Inducible mechanisms of disease tolerance provide  
1443 an alternative strategy of acquired immunity to malaria. *Elife* **10**, e63838 (2021).
- 1444 136. J. Church, K. Maitland, Invasive bacterial co-infection in African children with Plasmodium  
1445 falciparum malaria: a systematic review. *Bmc Med* **12**, 31 (2014).
- 1446 137. J. Attanasio, E. J. Wherry, Costimulatory and Coinhibitory Receptor Pathways in Infectious  
1447 Disease. *Immunity* **44**, 1052–1068 (2016).
- 1448 138. M. Ty, S. Sun, P. Callaway, J. Rek, K. Press, K. van der Ploeg, J. Nideffer, Z. Hu, S.  
1449 Klemm, W. Greenleaf, M. Donato, S. Tukwasibwe, E. Arinaitwe, F. Nankya, K. Musinguzi, D.  
1450 Andrew, L. de la Parte, D. M. Mori, S. Lewis, S. Takahashi, I. Rodriguez-Barraquer, B.  
1451 Greenhouse, C. Blish, P. Utz, P. Khatri, G. Dorsey, M. Kanya, M. Boyle, M. Feeney, I.  
1452 Ssewanyana, P. Jagannathan, Malaria-driven expansion of adaptive-1 like functional CD56-  
1453 negative NK cells correlates with clinical immunity to malaria. 07 November 2022, PREPRINT  
1454 (Version 1) available at Research Square [<https://doi.org/10.21203/rs.3.rs-1820334/v1>]
- 1455 139. M. Walther, D. Jeffries, O. C. Finney, M. Njie, A. Ebonyi, S. Deininger, E. Lawrence, A.  
1456 Ngwa-Amambua, S. Jayasooriya, I. H. Cheeseman, N. Gomez-Escobar, J. Okebe, D. J. Conway,  
1457 E. M. Riley, Distinct Roles for FOXP3<sup>+</sup> and FOXP3<sup>-</sup> CD4<sup>+</sup> T Cells in Regulating Cellular  
1458 Immunity to Uncomplicated and Severe Plasmodium falciparum Malaria. *Plos Pathog* **5**,  
1459 e1000364 (2009).
- 1460 140. J. J. Guthmiller, A. C. Graham, R. A. Zander, R. L. Pope, N. S. Butler, Cutting Edge: IL-10  
1461 Is Essential for the Generation of Germinal Center B Cell Responses and Anti-Plasmodium  
1462 Humoral Immunity. *J Immunol* **198**, 617–622 (2017).

- 1463 141. X. Clemente-Casares, J. Blanco, P. Ambalavanan, J. Yamanouchi, S. Singha, C. Fandos, S.  
1464 Tsai, J. Wang, N. Garabatos, C. Izquierdo, S. Agrawal, M. B. Keough, V. W. Yong, E. James, A.  
1465 Moore, Y. Yang, T. Stratmann, P. Serra, P. Santamaria, Expanding antigen-specific regulatory  
1466 networks to treat autoimmunity. *Nature* **530**, 434–440 (2016).
- 1467 142. J. M. González-Navajas, J. Lee, M. David, E. Raz, Immunomodulatory functions of type I  
1468 interferons. *Nature reviews. Immunology* **12**, 125–135 (2012).
- 1469 143. S. Silva-Barrios, S. Stäger, Protozoan Parasites and Type I IFNs. *Frontiers in immunology*  
1470 **8**, 14 (2017).
- 1471 144. K. Obieglo, A. Costain, L. M. Webb, A. Ozir-Fazalalikhani, S. L. Brown, A. S. MacDonald,  
1472 H. H. Smits, Type I interferons provide additive signals for murine regulatory B cell induction by  
1473 *Schistosoma mansoni* eggs. *Eur J Immunol* **49**, 1226–1234 (2019).
- 1474 145. M. F. Chughlay, K. I. Barnes, M. E. Gaaloul, N. Abla, J. J. Möhrle, P. Griffin, P. van  
1475 Giersbergen, S. E. Reuter, H. B. Schultz, A. Kress, P. Tapley, R. A. Webster, T. Wells, J. S.  
1476 McCarthy, B. E. Barber, L. Marquart, M. J. Boyle, C. R. Engwerda, S. Chalon, Safety,  
1477 Tolerability, Pharmacokinetics, and Pharmacodynamics of Coadministered Ruxolitinib and  
1478 Artemether-Lumefantrine in Healthy Adults. *Antimicrob Agents Ch* **66**, e01584-21 (2021).
- 1479 146. R. Kumar, J. R. Loughland, S. S. Ng, M. J. Boyle, C. R. Engwerda, The regulation of CD4<sup>+</sup>  
1480 T cells during malaria. *Immunological reviews* **293**, 70–87 (2020).
- 1481 147. M. J. Grigg, T. William, B. E. Barber, G. S. Rajahram, J. Menon, E. Schimann, K. Piera, C.  
1482 S. Wilkes, K. Patel, A. Chandna, C. J. Drakeley, T. W. Yeo, N. M. Anstey, Age-Related Clinical  
1483 Spectrum of *Plasmodium knowlesi* Malaria and Predictors of Severity. *Clinical Infectious*  
1484 *Diseases* **67**, 350–359 (2018).

- 1485 148. M. J. Grigg, T. William, K. A. Piera, G. S. Rajahram, J. Jelip, A. Aziz, J. Menon, J.  
1486 Marfurt, R. N. Price, S. Auburn, B. E. Barber, T. W. Yeo, N. M. Anstey, Plasmodium falciparum  
1487 artemisinin resistance monitoring in Sabah, Malaysia: in vivo therapeutic efficacy and kelch13  
1488 molecular marker surveillance. *Malaria J* **17**, 463 (2018).
- 1489 149. B. E. Barber, T. William, M. J. Grigg, J. Menon, S. Auburn, J. Marfurt, N. M. Anstey, T.  
1490 W. Yeo, A prospective comparative study of knowlesi, falciparum, and vivax malaria in Sabah,  
1491 Malaysia: high proportion with severe disease from Plasmodium knowlesi and Plasmodium  
1492 vivax but no mortality with early referral and artesunate therapy. *Clinical Infectious Diseases* **56**,  
1493 383–397 (2013).
- 1494 150. Y. Hao, S. Hao, E. Andersen-Nissen, W. M. Mauck, S. Zheng, A. Butler, M. J. Lee, A. J.  
1495 Wilk, C. Darby, M. Zager, P. Hoffman, M. Stoeckius, E. Papalexi, E. P. Mimitou, J. Jain, A.  
1496 Srivastava, T. Stuart, L. M. Fleming, B. Yeung, A. J. Rogers, J. M. McElrath, C. A. Blish, R.  
1497 Gottardo, P. Smibert, R. Satija, Integrated analysis of multimodal single-cell data. *Cell* (2021),  
1498 doi:10.1016/j.cell.2021.04.048.
- 1499 151. A. Subramanian, P. Tamayo, V. K. Mootha, S. Mukherjee, B. L. Ebert, M. A. Gillette, A.  
1500 Paulovich, S. L. Pomeroy, T. R. Golub, E. S. Lander, J. P. Mesirov, Gene set enrichment  
1501 analysis: A knowledge-based approach for interpreting genome-wide expression profiles. *Proc*  
1502 *National Acad Sci* **102**, 15545–15550 (2005).
- 1503 152. S. Heinz, C. Benner, N. Spann, E. Bertolino, Y. C. Lin, P. Laslo, J. X. Cheng, C. Murre, H.  
1504 Singh, C. K. Glass, Simple Combinations of Lineage-Determining Transcription Factors Prime  
1505 cis-Regulatory Elements Required for Macrophage and B Cell Identities. *Mol Cell* **38**, 576–589  
1506 (2010).



1507 153. S.-M. Ong, K. Teng, E. Newell, H. Chen, J. Chen, T. Loy, T.-W. Yeo, K. Fink, S.-C. Wong,  
1508 A Novel, Five-Marker Alternative to CD16–CD14 Gating to Identify the Three Human  
1509 Monocyte Subsets. *Front Immunol* **10**, 1761 (2019).  
1510
