# Supplementary material for: Malaria drives unique regulatory responses across multiple immune cell subsets
Source: bioRxiv preprint, doi:10.1101/2022.11.16.516822, version 1 (2022-11-17)
Supplement: Supplementary Table S3 [file 516822_file04.xlsx]

## Sheet: Table S3A - Day0v7
Gene	CD14 Monos_avg_log2FC	CD14 Monos_p_val_adj	CD16 Monos_avg_log2FC	CD16 Monos_p_val_adj	cDCs_avg_log2FC	cDCs_p_val_adj	pDCs_avg_log2FC	pDCs_p_val_adj	CD4 T_avg_log2FC	CD4 T_p_val_adj	CD8 T_avg_log2FC	CD8 T_p_val_adj	GDT_avg_log2FC	GDT_p_val_adj	NKT_avg_log2FC	NKT_p_val_adj	NK_avg_log2FC	NK_p_val_adj	B cells_avg_log2FC	B cells_p_val_adj	Plasma_avg_log2FC	Plasma_p_val_adj	Proliferating_avg_log2FC	Proliferating_p_val_adj	HSPCs_avg_log2FC	HSPCs_p_val_adj	Platelets_avg_log2FC	Platelets_p_val_adj	Unknown_avg_log2FC	Unknown_p_val_adj
AAED1	-0.720394	3.72748e-83	-0.656872	1.03683e-10	-0.637905	0.0146088	-0.250343	1	NA	NA	NA	NA	NA	NA	0.422012	3.58352e-05	NA	NA	NA	NA	NA	NA	NA	NA	-0.414144	1	NA	NA	NA	NA
AAK1	0.712164	1.69348e-118	0.564345	0.000577817	0.810484	0.0174174	NA	NA	NA	NA	NA	NA	NA	NA	-0.389745	1	NA	NA	NA	NA	NA	NA	NA	NA	0.453285	1	2.93726	1	0.747435	1.92643e-06
AATF	NA	NA	NA	NA	NA	NA	NA	NA	NA	NA	NA	NA	NA	NA	NA	NA	NA	NA	NA	NA	NA	NA	NA	NA	NA	NA	-1.05766	1	NA	NA
AATK	NA	NA	NA	NA	NA	NA	NA	NA	NA	NA	NA	NA	NA	NA	NA	NA	NA	NA	NA	NA	NA	NA	NA	NA	NA	NA	-0.909075	1	NA	NA
ABAT	NA	NA	NA	NA	NA	NA	NA	NA	NA	NA	NA	NA	NA	NA	NA	NA	NA	NA	NA	NA	NA	NA	NA	NA	NA	NA	-1.10281	1	NA	NA
ABCA1	-0.813357	9.51704e-42	-0.616871	0.0281219	NA	NA	NA	NA	NA	NA	NA	NA	0.292659	1.14035e-14	NA	NA	NA	NA	0.286655	1.30077e-06	NA	NA	NA	NA	NA	NA	NA	NA	NA	NA
ABCB8	NA	NA	NA	NA	NA	NA	-0.301563	1	NA	NA	NA	NA	NA	NA	NA	NA	NA	NA	NA	NA	NA	NA	NA	NA	NA	NA	1.572	1	NA	NA
ABCC3	NA	NA	NA	NA	NA	NA	NA	NA	NA	NA	NA	NA	NA	NA	NA	NA	NA	NA	NA	NA	NA	NA	NA	NA	NA	NA	-1.05763	1	NA	NA
ABCC4	NA	NA	NA	NA	NA	NA	NA	NA	NA	NA	NA	NA	NA	NA	NA	NA	NA	NA	NA	NA	NA	NA	NA	NA	NA	NA	-0.810108	1	NA	NA
ABCG1	NA	NA	NA	NA	NA	NA	-0.282229	1	NA	NA	NA	NA	0.329763	2.12617e-25	NA	NA	NA	NA	NA	NA	NA	NA	NA	NA	NA	NA	NA	NA	0.491619	1
ABHD14B	NA	NA	NA	NA	NA	NA	NA	NA	NA	NA	NA	NA	NA	NA	NA	NA	NA	NA	NA	NA	NA	NA	NA	NA	-0.635918	0.000127243	NA	NA	NA	NA
ABHD17A	NA	NA	NA	NA	NA	NA	NA	NA	NA	NA	NA	NA	NA	NA	-0.39257	1	NA	NA	NA	NA	NA	NA	NA	NA	0.284728	1	-2.93685	1	-0.552603	0.0858691
ABHD2	NA	NA	NA	NA	NA	NA	0.287438	1	NA	NA	NA	NA	NA	NA	-0.25779	1	NA	NA	NA	NA	NA	NA	NA	NA	-0.347163	0.0602491	NA	NA	NA	NA
ABHD4	NA	NA	NA	NA	NA	NA	NA	NA	NA	NA	NA	NA	NA	NA	NA	NA	NA	NA	NA	NA	NA	NA	NA	NA	NA	NA	-0.869645	1	NA	NA
ABI1	NA	NA	NA	NA	NA	NA	-0.284349	1	NA	NA	NA	NA	NA	NA	NA	NA	NA	NA	NA	NA	NA	NA	NA	NA	NA	NA	-0.81301	1	0.417864	1
ABI2	NA	NA	NA	NA	NA	NA	NA	NA	NA	NA	NA	NA	NA	NA	NA	NA	NA	NA	NA	NA	NA	NA	NA	NA	-0.382875	0.504404	NA	NA	NA	NA
ABL1	NA	NA	NA	NA	-0.258891	1	NA	NA	NA	NA	NA	NA	NA	NA	NA	NA	NA	NA	NA	NA	NA	NA	NA	NA	NA	NA	NA	NA	NA	NA
ABL2	-0.448608	3.35987e-34	-0.279277	1	NA	NA	NA	NA	NA	NA	NA	NA	NA	NA	NA	NA	NA	NA	NA	NA	NA	NA	NA	NA	NA	NA	1.21583	1	NA	NA
ABO	NA	NA	NA	NA	NA	NA	NA	NA	NA	NA	NA	NA	NA	NA	NA	NA	NA	NA	NA	NA	NA	NA	NA	NA	-0.501944	0.000862732	NA	NA	NA	NA
ABRAXAS1	NA	NA	NA	NA	NA	NA	NA	NA	NA	NA	NA	NA	NA	NA	NA	NA	NA	NA	NA	NA	NA	NA	NA	NA	-0.270846	0.0775178	NA	NA	NA	NA
ABTB1	NA	NA	NA	NA	NA	NA	NA	NA	NA	NA	NA	NA	NA	NA	NA	NA	NA	NA	NA	NA	NA	NA	NA	NA	NA	NA	-1.1993	1	NA	NA
AC002454.1	NA	NA	NA	NA	NA	NA	NA	NA	NA	NA	NA	NA	NA	NA	NA	NA	NA	NA	NA	NA	NA	NA	NA	NA	-0.331182	1	NA	NA	NA	NA
AC004151.1	0.577701	8.35174e-178	0.646581	7.05713e-19	0.671214	2.8188e-05	0.652211	1	NA	NA	NA	NA	NA	NA	-0.728463	5.29022e-05	NA	NA	NA	NA	NA	NA	NA	NA	0.701813	0.0133378	NA	NA	0.70415	0.0554577
AC004687.1	-0.483468	3.82956e-40	-0.437165	1.84369e-07	-0.662269	0.0246498	-0.411542	0.242439	NA	NA	NA	NA	NA	NA	NA	NA	NA	NA	NA	NA	NA	NA	NA	NA	-0.272495	1	NA	NA	NA	NA
AC004817.3	NA	NA	NA	NA	-0.285575	1	NA	NA	NA	NA	NA	NA	NA	NA	NA	NA	NA	NA	NA	NA	NA	NA	NA	NA	NA	NA	NA	NA	NA	NA
AC005224.3	NA	NA	-0.427171	0.000131554	NA	NA	NA	NA	NA	NA	NA	NA	NA	NA	NA	NA	NA	NA	NA	NA	NA	NA	NA	NA	NA	NA	NA	NA	NA	NA
AC005280.2	-0.549477	1.24282e-58	NA	NA	NA	NA	NA	NA	NA	NA	NA	NA	NA	NA	NA	NA	NA	NA	NA	NA	NA	NA	NA	NA	NA	NA	NA	NA	NA	NA
AC006449.6	-0.605645	7.78129e-69	-0.277627	0.00446553	NA	NA	NA	NA	NA	NA	NA	NA	NA	NA	NA	NA	NA	NA	NA	NA	NA	NA	NA	NA	NA	NA	NA	NA	NA	NA
AC007032.1	-0.525957	6.0676e-55	-0.353457	1.17527e-05	NA	NA	NA	NA	NA	NA	NA	NA	NA	NA	NA	NA	NA	NA	NA	NA	NA	NA	NA	NA	NA	NA	NA	NA	NA	NA
AC007952.4	-1.58131	5.48507e-138	-0.786385	5.92258e-13	-0.777292	0.0146088	-0.806364	0.00462194	NA	NA	NA	NA	NA	NA	NA	NA	NA	NA	NA	NA	NA	NA	NA	NA	-0.308393	1	NA	NA	NA	NA
AC008105.3	NA	NA	-0.284363	5.91702e-05	NA	NA	NA	NA	NA	NA	NA	NA	NA	NA	NA	NA	NA	NA	NA	NA	NA	NA	NA	NA	NA	NA	NA	NA	NA	NA
AC008124.1	NA	NA	NA	NA	NA	NA	NA	NA	NA	NA	NA	NA	NA	NA	NA	NA	NA	NA	NA	NA	NA	NA	NA	NA	NA	NA	-0.40047	1	NA	NA
AC010197.2	NA	NA	NA	NA	NA	NA	0.46112	1	NA	NA	NA	NA	NA	NA	-0.658359	9.56467e-05	NA	NA	NA	NA	NA	NA	NA	NA	NA	NA	NA	NA	NA	NA
AC013394.1	NA	NA	NA	NA	NA	NA	NA	NA	0.271211	3.98246e-80	NA	NA	NA	NA	NA	NA	NA	NA	NA	NA	NA	NA	NA	NA	0.609437	1	0.457965	1	1.04681	1.57183e-05
AC015912.3	-1.48155	2.13342e-143	-0.560555	9.91489e-07	NA	NA	NA	NA	NA	NA	NA	NA	NA	NA	NA	NA	NA	NA	NA	NA	NA	NA	NA	NA	NA	NA	NA	NA	NA	NA
AC016831.1	-0.766962	2.66081e-81	-0.560218	5.84497e-09	-0.552083	0.473916	-0.377106	1	NA	NA	NA	NA	NA	NA	0.250308	1	NA	NA	NA	NA	NA	NA	NA	NA	NA	NA	NA	NA	NA	NA
AC016831.5	-1.1	1.7986e-124	-0.887845	2.5266e-15	-0.864458	0.00498146	-0.884895	0.00232725	NA	NA	NA	NA	NA	NA	0.394187	0.575895	0.253719	7.00889e-11	NA	NA	NA	NA	NA	NA	NA	NA	NA	NA	NA	NA
AC016831.7	-0.414263	2.87195e-41	-0.402348	1.84369e-07	-0.54787	0.473916	-0.607201	0.00910681	NA	NA	NA	NA	NA	NA	0.391121	1	0.27812	3.25078e-09	NA	NA	NA	NA	NA	NA	NA	NA	NA	NA	NA	NA
AC020656.1	-2.64473	3.38665e-242	-0.741063	1.40086e-08	-1.87274	2.18328e-05	NA	NA	NA	NA	NA	NA	NA	NA	NA	NA	NA	NA	NA	NA	NA	NA	NA	NA	NA	NA	NA	NA	NA	NA
AC020916.1	-1.42884	9.39685e-143	-0.758408	4.20384e-15	-0.838917	0.00498146	-0.608615	0.0178068	NA	NA	NA	NA	NA	NA	NA	NA	NA	NA	NA	NA	NA	NA	NA	NA	-1.41272	3.19003e-06	NA	NA	NA	NA
AC021066.1	NA	NA	NA	NA	NA	NA	NA	NA	NA	NA	NA	NA	NA	NA	NA	NA	-0.467136	3.32127e-13	NA	NA	NA	NA	NA	NA	NA	NA	NA	NA	NA	NA
AC022966.1	0.309753	1.04106e-74	0.372871	9.32472e-09	0.292255	0.284446	0.253249	1	NA	NA	NA	NA	NA	NA	-0.538901	0.00500918	NA	NA	NA	NA	NA	NA	NA	NA	0.505889	1	2.87048	1	0.907058	0.00395367
AC023157.3	-0.316881	2.81201e-21	NA	NA	NA	NA	NA	NA	NA	NA	NA	NA	NA	NA	NA	NA	NA	NA	NA	NA	NA	NA	NA	NA	NA	NA	NA	NA	NA	NA
AC023590.1	NA	NA	NA	NA	NA	NA	-0.272169	1	NA	NA	NA	NA	NA	NA	NA	NA	NA	NA	NA	NA	NA	NA	NA	NA	NA	NA	NA	NA	NA	NA
AC025164.1	-0.414047	5.12448e-41	-0.251668	0.00446553	NA	NA	NA	NA	NA	NA	NA	NA	NA	NA	NA	NA	NA	NA	NA	NA	NA	NA	NA	NA	NA	NA	NA	NA	NA	NA
AC044849.1	-0.387189	3.3889e-39	-0.280459	0.00963034	-0.436698	0.754869	-0.280518	1	NA	NA	NA	NA	-0.252634	0.0182108	0.669455	4.80215e-07	NA	NA	NA	NA	NA	NA	NA	NA	-0.344576	1	NA	NA	NA	NA
AC058791.1	NA	NA	-0.300004	0.000945229	-0.785153	0.00498146	-0.837406	0.00462194	NA	NA	NA	NA	NA	NA	0.805691	9.28848e-05	0.282168	1.04478e-08	NA	NA	NA	NA	-0.312714	1	NA	NA	NA	NA	NA	NA
AC064805.1	NA	NA	-0.312982	1.17527e-05	NA	NA	NA	NA	NA	NA	NA	NA	NA	NA	NA	NA	NA	NA	NA	NA	NA	NA	NA	NA	NA	NA	NA	NA	NA	NA
AC084033.3	NA	NA	NA	NA	NA	NA	NA	NA	NA	NA	NA	NA	NA	NA	NA	NA	NA	NA	NA	NA	NA	NA	NA	NA	-1.27156	1.62046e-05	NA	NA	NA	NA
AC087239.1	-0.310437	7.2136e-28	NA	NA	NA	NA	NA	NA	NA	NA	NA	NA	NA	NA	NA	NA	NA	NA	NA	NA	NA	NA	NA	NA	NA	NA	NA	NA	NA	NA
AC090409.1	NA	NA	NA	NA	NA	NA	NA	NA	NA	NA	NA	NA	NA	NA	NA	NA	NA	NA	NA	NA	NA	NA	NA	NA	NA	NA	-1.07131	1	NA	NA
AC091271.1	-0.373739	1.77591e-34	-0.332561	0.00303496	NA	NA	NA	NA	NA	NA	NA	NA	NA	NA	NA	NA	NA	NA	NA	NA	NA	NA	NA	NA	NA	NA	NA	NA	NA	NA
AC092683.1	NA	NA	NA	NA	NA	NA	-0.426393	0.458129	NA	NA	NA	NA	NA	NA	NA	NA	NA	NA	NA	NA	NA	NA	NA	NA	-0.582919	0.19538	NA	NA	NA	NA
AC092803.2	-0.306698	4.38451e-35	-0.260496	0.0643881	NA	NA	NA	NA	NA	NA	NA	NA	NA	NA	NA	NA	NA	NA	NA	NA	NA	NA	NA	NA	NA	NA	NA	NA	NA	NA
AC093012.1	0.299402	1.70302e-85	0.358177	1.32402e-13	NA	NA	0.255433	1	NA	NA	NA	NA	NA	NA	-0.29153	1	NA	NA	NA	NA	NA	NA	NA	NA	0.25999	1	0.897081	1	NA	NA
AC093673.1	-0.455805	7.24014e-54	-0.260841	0.0206657	NA	NA	NA	NA	NA	NA	NA	NA	NA	NA	NA	NA	NA	NA	NA	NA	NA	NA	NA	NA	NA	NA	-0.606933	1	NA	NA
AC096667.1	-0.522953	2.74772e-59	NA	NA	NA	NA	NA	NA	NA	NA	NA	NA	NA	NA	NA	NA	NA	NA	NA	NA	NA	NA	NA	NA	NA	NA	NA	NA	NA	NA
AC100810.1	-0.412434	3.5834e-49	NA	NA	-0.314362	1	NA	NA	NA	NA	NA	NA	NA	NA	NA	NA	NA	NA	NA	NA	NA	NA	NA	NA	NA	NA	-1.52222	1	NA	NA
AC103591.3	-0.93959	2.97222e-81	-0.599641	3.33197e-08	-0.452568	1	-0.446628	0.242439	NA	NA	NA	NA	NA	NA	NA	NA	NA	NA	NA	NA	NA	NA	NA	NA	-0.335197	1	NA	NA	NA	NA
AC119428.2	NA	NA	NA	NA	NA	NA	-1.05983	3.16101e-05	NA	NA	NA	NA	NA	NA	NA	NA	NA	NA	NA	NA	NA	NA	NA	NA	NA	NA	NA	NA	NA	NA
AC124798.1	-0.256921	1.85458e-29	NA	NA	NA	NA	NA	NA	NA	NA	NA	NA	NA	NA	NA	NA	NA	NA	NA	NA	NA	NA	NA	NA	NA	NA	NA	NA	NA	NA
AC147651.1	NA	NA	NA	NA	NA	NA	NA	NA	NA	NA	NA	NA	NA	NA	NA	NA	NA	NA	NA	NA	NA	NA	NA	NA	NA	NA	-2.18512	1	NA	NA
AC147651.4	NA	NA	NA	NA	NA	NA	NA	NA	NA	NA	NA	NA	NA	NA	NA	NA	NA	NA	NA	NA	NA	NA	NA	NA	NA	NA	-0.825294	1	NA	NA
AC243829.1	NA	NA	NA	NA	NA	NA	NA	NA	NA	NA	NA	NA	NA	NA	NA	NA	NA	NA	NA	NA	NA	NA	NA	NA	NA	NA	-0.40047	1	NA	NA
AC245014.3	-0.888867	5.49862e-78	-0.276988	0.0643881	NA	NA	-0.363873	0.242439	NA	NA	NA	NA	NA	NA	NA	NA	NA	NA	NA	NA	NA	NA	NA	NA	NA	NA	NA	NA	NA	NA
AC245128.3	-1.86542	4.44208e-221	-0.71138	1.63577e-11	NA	NA	NA	NA	NA	NA	NA	NA	NA	NA	NA	NA	NA	NA	NA	NA	NA	NA	NA	NA	NA	NA	NA	NA	NA	NA
AC245297.3	-0.56112	3.98116e-59	-0.311668	2.64527e-05	NA	NA	NA	NA	NA	NA	NA	NA	NA	NA	0.298247	1	NA	NA	NA	NA	NA	NA	NA	NA	-0.365281	0.920835	NA	NA	NA	NA
ACADM	NA	NA	NA	NA	NA	NA	NA	NA	NA	NA	NA	NA	NA	NA	NA	NA	NA	NA	NA	NA	NA	NA	NA	NA	-0.262757	1	NA	NA	NA	NA
ACAP1	0.254249	1.48711e-63	NA	NA	-0.283843	1	NA	NA	NA	NA	NA	NA	NA	NA	NA	NA	NA	NA	NA	NA	NA	NA	NA	NA	NA	NA	0.728595	1	0.380532	0.296909
ACAP2	0.299032	3.11882e-55	NA	NA	NA	NA	NA	NA	NA	NA	NA	NA	NA	NA	-0.373719	1	NA	NA	NA	NA	NA	NA	NA	NA	NA	NA	-1.33358	1	-0.260933	1
ACOT13	NA	NA	NA	NA	NA	NA	NA	NA	NA	NA	NA	NA	NA	NA	NA	NA	NA	NA	NA	NA	NA	NA	NA	NA	-0.376924	2.15899e-05	NA	NA	NA	NA
ACP1	NA	NA	NA	NA	NA	NA	NA	NA	NA	NA	NA	NA	NA	NA	NA	NA	NA	NA	NA	NA	NA	NA	NA	NA	NA	NA	-1.61156	1	NA	NA
ACRBP	NA	NA	NA	NA	NA	NA	NA	NA	NA	NA	NA	NA	NA	NA	NA	NA	NA	NA	NA	NA	NA	NA	NA	NA	NA	NA	-2.60808	1	NA	NA
ACTB	0.517889	3.30561e-30	0.724995	4.10083e-07	0.317991	1	NA	NA	NA	NA	NA	NA	NA	NA	NA	NA	NA	NA	NA	NA	-0.364659	1	-0.368259	0.709905	-0.277717	1	-2.47268	1	-0.66569	5.6915e-06
ACTG1	NA	NA	0.445432	0.268371	-0.381896	1	-0.258407	1	-0.338738	2.45095e-148	NA	NA	NA	NA	NA	NA	NA	NA	NA	NA	-0.886565	0.00455551	-0.809687	5.41876e-07	-0.646986	1.79635e-05	-1.92639	1	-0.371302	1
ACTN1	NA	NA	0.343298	0.380726	NA	NA	NA	NA	NA	NA	NA	NA	NA	NA	NA	NA	NA	NA	NA	NA	NA	NA	NA	NA	0.277518	1	-1.48252	1	NA	NA
ACTN4	0.270124	1.9807e-54	0.355405	0.315165	0.490245	1	NA	NA	NA	NA	NA	NA	NA	NA	NA	NA	NA	NA	NA	NA	NA	NA	0.314015	1	-0.499989	0.000343084	-1.11568	1	-0.411703	1
ACTR10	NA	NA	NA	NA	0.300629	1	NA	NA	NA	NA	NA	NA	NA	NA	NA	NA	NA	NA	NA	NA	NA	NA	NA	NA	NA	NA	-0.686512	1	NA	NA
ACTR2	0.721346	1.08553e-62	0.508872	5.74753e-05	0.835597	7.36928e-06	NA	NA	NA	NA	NA	NA	NA	NA	-0.292609	1	NA	NA	NA	NA	NA	NA	NA	NA	NA	NA	0.255416	1	NA	NA
ACTR3	0.696721	3.89574e-70	0.708595	6.02268e-12	0.745853	0.0148084	NA	NA	NA	NA	NA	NA	NA	NA	-0.340434	1	NA	NA	NA	NA	NA	NA	NA	NA	NA	NA	-0.945712	1	NA	NA
ADA2	-0.475267	1.67713e-61	-0.374241	1	NA	NA	NA	NA	NA	NA	NA	NA	NA	NA	NA	NA	NA	NA	NA	NA	NA	NA	NA	NA	NA	NA	1.21965	1	NA	NA
ADAM10	0.451478	1.33288e-67	0.873316	2.34054e-10	0.581631	0.0180079	NA	NA	NA	NA	NA	NA	NA	NA	NA	NA	NA	NA	NA	NA	NA	NA	NA	NA	NA	NA	-1.07705	1	0.478786	1
ADAM17	NA	NA	NA	NA	0.564567	1	-0.298411	1	NA	NA	NA	NA	NA	NA	NA	NA	NA	NA	NA	NA	NA	NA	NA	NA	-0.495604	0.0354423	1.21583	1	NA	NA
ADAM28	NA	NA	NA	NA	NA	NA	NA	NA	NA	NA	NA	NA	NA	NA	NA	NA	NA	NA	NA	NA	NA	NA	NA	NA	-0.372442	0.445045	NA	NA	NA	NA
ADAM8	NA	NA	0.444193	0.424601	-0.431493	1	NA	NA	NA	NA	NA	NA	NA	NA	NA	NA	NA	NA	NA	NA	NA	NA	NA	NA	NA	NA	NA	NA	NA	NA
ADAR	NA	NA	-0.373981	0.73208	NA	NA	NA	NA	NA	NA	NA	NA	NA	NA	NA	NA	NA	NA	NA	NA	NA	NA	NA	NA	NA	NA	NA	NA	0.654903	1
ADD1	NA	NA	NA	NA	NA	NA	NA	NA	NA	NA	NA	NA	NA	NA	NA	NA	NA	NA	NA	NA	NA	NA	NA	NA	NA	NA	-1.34581	1	0.297488	1
ADD3	0.640479	1.78657e-95	NA	NA	0.771868	0.0462214	0.376165	1	NA	NA	NA	NA	NA	NA	-0.306633	1	NA	NA	NA	NA	NA	NA	NA	NA	0.668158	0.2354	-1.4875	1	0.656187	0.00222095
ADGRE2	NA	NA	0.385687	1	NA	NA	NA	NA	NA	NA	NA	NA	NA	NA	NA	NA	NA	NA	NA	NA	NA	NA	NA	NA	-0.527386	0.110439	NA	NA	NA	NA
ADGRG1	NA	NA	NA	NA	NA	NA	NA	NA	NA	NA	NA	NA	NA	NA	NA	NA	NA	NA	NA	NA	NA	NA	NA	NA	-0.347863	1	NA	NA	NA	NA
ADI1	NA	NA	-0.312672	1	NA	NA	-0.374025	1	NA	NA	NA	NA	NA	NA	NA	NA	NA	NA	NA	NA	NA	NA	NA	NA	NA	NA	-1.4903	1	NA	NA
ADIPOR1	NA	NA	NA	NA	0.274974	1	NA	NA	NA	NA	NA	NA	NA	NA	NA	NA	NA	NA	NA	NA	NA	NA	NA	NA	NA	NA	-2.3731	1	NA	NA
ADIPOR2	0.361721	1.67772e-95	0.328789	0.0235027	0.320185	1	NA	NA	NA	NA	NA	NA	NA	NA	NA	NA	NA	NA	NA	NA	NA	NA	NA	NA	NA	NA	-0.947259	1	NA	NA
ADM	NA	NA	0.961179	8.53252e-10	-0.258324	1	NA	NA	NA	NA	NA	NA	NA	NA	NA	NA	NA	NA	NA	NA	0.256813	1	NA	NA	NA	NA	NA	NA	NA	NA
ADNP	NA	NA	NA	NA	-0.315393	1	-0.329611	1	NA	NA	NA	NA	NA	NA	NA	NA	NA	NA	NA	NA	NA	NA	NA	NA	NA	NA	0.265065	1	NA	NA
ADNP2	NA	NA	NA	NA	NA	NA	-0.27365	1	NA	NA	NA	NA	NA	NA	NA	NA	NA	NA	NA	NA	NA	NA	NA	NA	NA	NA	0.622453	1	NA	NA
ADPGK	NA	NA	NA	NA	0.2698	1	-0.252869	1	NA	NA	NA	NA	NA	NA	NA	NA	NA	NA	NA	NA	NA	NA	NA	NA	NA	NA	NA	NA	NA	NA
ADRM1	NA	NA	NA	NA	NA	NA	NA	NA	NA	NA	NA	NA	NA	NA	NA	NA	NA	NA	NA	NA	NA	NA	NA	NA	NA	NA	-1.22554	1	NA	NA
ADSS	-0.343926	8.76775e-34	-0.444242	3.33197e-08	NA	NA	NA	NA	NA	NA	NA	NA	NA	NA	0.351621	0.000145824	NA	NA	NA	NA	NA	NA	NA	NA	NA	NA	NA	NA	NA	NA
ADSS2	0.418974	8.90704e-106	0.597117	4.66579e-14	0.32908	1	0.287949	1	NA	NA	NA	NA	NA	NA	-0.512761	0.116831	NA	NA	NA	NA	NA	NA	NA	NA	NA	NA	1.05588	1	0.442133	1
AES	-0.98167	4.85956e-115	-0.828938	2.30036e-15	-1.27368	2.18328e-05	-1.41668	3.16101e-05	NA	NA	NA	NA	NA	NA	1.48061	1.30826e-13	0.273229	0.000319472	NA	NA	NA	NA	-0.516729	1	-0.892713	0.000119783	NA	NA	-0.673396	1
AFAP1	NA	NA	NA	NA	NA	NA	NA	NA	NA	NA	NA	NA	NA	NA	NA	NA	NA	NA	NA	NA	NA	NA	NA	NA	NA	NA	-1.14261	1	NA	NA
AFF3	NA	NA	NA	NA	-0.479368	1	NA	NA	NA	NA	NA	NA	NA	NA	NA	NA	NA	NA	NA	NA	NA	NA	NA	NA	NA	NA	0.622453	1	NA	NA
AFTPH	NA	NA	NA	NA	0.322691	1	-0.268413	1	NA	NA	NA	NA	NA	NA	NA	NA	NA	NA	NA	NA	NA	NA	NA	NA	NA	NA	1.43135	1	NA	NA
AGAP3	-0.265859	3.27495e-16	NA	NA	NA	NA	NA	NA	NA	NA	NA	NA	NA	NA	NA	NA	NA	NA	NA	NA	NA	NA	NA	NA	NA	NA	NA	NA	NA	NA
AGBL5	NA	NA	NA	NA	NA	NA	NA	NA	NA	NA	NA	NA	NA	NA	NA	NA	NA	NA	NA	NA	NA	NA	NA	NA	NA	NA	-0.912346	1	NA	NA
AGO2	-0.344603	4.92693e-38	-0.483588	0.0541367	-0.550659	1	-0.502223	1	NA	NA	NA	NA	NA	NA	NA	NA	NA	NA	NA	NA	NA	NA	NA	NA	NA	NA	2.2595	1	NA	NA
AGO3	NA	NA	NA	NA	NA	NA	NA	NA	NA	NA	NA	NA	NA	NA	NA	NA	NA	NA	NA	NA	NA	NA	NA	NA	-0.496306	2.68801e-05	NA	NA	NA	NA
AGPAT2	NA	NA	NA	NA	0.406321	1	-0.695346	1	NA	NA	NA	NA	NA	NA	NA	NA	NA	NA	NA	NA	NA	NA	NA	NA	-0.373298	0.913859	NA	NA	NA	NA
AGPAT4	0.34163	1.87394e-77	NA	NA	NA	NA	NA	NA	NA	NA	NA	NA	NA	NA	NA	NA	NA	NA	NA	NA	NA	NA	NA	NA	-0.292204	1	NA	NA	NA	NA
AHCTF1	NA	NA	NA	NA	0.264817	1	NA	NA	NA	NA	NA	NA	NA	NA	NA	NA	NA	NA	NA	NA	NA	NA	NA	NA	NA	NA	0.778007	1	1.08894	0.00815666
AHCY	NA	NA	NA	NA	NA	NA	-0.37504	1	NA	NA	NA	NA	NA	NA	NA	NA	NA	NA	NA	NA	NA	NA	NA	NA	-0.255851	0.357479	NA	NA	NA	NA
AHCYL1	NA	NA	NA	NA	NA	NA	NA	NA	NA	NA	NA	NA	NA	NA	NA	NA	NA	NA	NA	NA	NA	NA	NA	NA	-0.330125	1	NA	NA	NA	NA
AHNAK	0.721071	6.85545e-47	0.910449	8.54859e-08	0.659039	1	-0.580146	1	-0.267196	1.18913e-44	-0.322934	3.41072e-25	NA	NA	-0.669384	1	NA	NA	-0.303702	0.000972602	NA	NA	NA	NA	-1.26312	1.06861e-10	NA	NA	NA	NA
AIDA	NA	NA	NA	NA	NA	NA	NA	NA	NA	NA	NA	NA	NA	NA	NA	NA	NA	NA	NA	NA	NA	NA	NA	NA	NA	NA	-1.00436	1	NA	NA
AIF1	-0.285859	6.24495e-05	NA	NA	0.476806	1	NA	NA	NA	NA	NA	NA	NA	NA	NA	NA	NA	NA	NA	NA	NA	NA	NA	NA	-0.727437	5.47343e-05	0.737875	1	NA	NA
AIG1	NA	NA	NA	NA	NA	NA	NA	NA	NA	NA	NA	NA	NA	NA	NA	NA	NA	NA	NA	NA	NA	NA	NA	NA	-0.26454	1	-1.71779	1	NA	NA
AK3	NA	NA	NA	NA	0.298762	1	NA	NA	NA	NA	NA	NA	NA	NA	NA	NA	NA	NA	NA	NA	NA	NA	NA	NA	-0.433888	0.00530146	NA	NA	NA	NA
AKAP12	NA	NA	NA	NA	-1.13487	1	NA	NA	NA	NA	NA	NA	NA	NA	NA	NA	NA	NA	NA	NA	NA	NA	NA	NA	NA	NA	NA	NA	NA	NA
AKAP13	NA	NA	NA	NA	-0.820697	0.0955461	-0.583417	1	NA	NA	NA	NA	NA	NA	NA	NA	NA	NA	NA	NA	NA	NA	NA	NA	0.290191	1	0.481917	1	NA	NA
AKAP17A	NA	NA	NA	NA	-0.30192	1	-0.254753	1	NA	NA	NA	NA	NA	NA	NA	NA	NA	NA	NA	NA	NA	NA	NA	NA	-0.406951	0.198552	NA	NA	0.657934	0.728324
AKAP5	NA	NA	NA	NA	NA	NA	NA	NA	NA	NA	NA	NA	NA	NA	NA	NA	-0.275447	3.38787e-08	NA	NA	NA	NA	NA	NA	NA	NA	NA	NA	NA	NA
AKAP8L	NA	NA	NA	NA	NA	NA	-0.320781	1	NA	NA	NA	NA	NA	NA	NA	NA	NA	NA	NA	NA	NA	NA	-0.262347	1	NA	NA	NA	NA	0.294532	1
AKAP9	NA	NA	-0.314032	1	NA	NA	NA	NA	NA	NA	NA	NA	NA	NA	-0.476135	1	NA	NA	NA	NA	0.341714	1	0.259612	1	NA	NA	2.37139	1	0.773282	2.4598e-05
AKIRIN1	NA	NA	NA	NA	NA	NA	-0.311232	1	NA	NA	NA	NA	NA	NA	-0.253995	1	NA	NA	NA	NA	NA	NA	NA	NA	NA	NA	0.759377	1	-0.263354	1
AKIRIN2	0.400425	3.92579e-38	NA	NA	0.445661	1	NA	NA	NA	NA	NA	NA	NA	NA	NA	NA	NA	NA	NA	NA	NA	NA	NA	NA	NA	NA	-2.07287	1	NA	NA
AKR1A1	NA	NA	0.317286	0.580618	NA	NA	NA	NA	NA	NA	NA	NA	NA	NA	NA	NA	NA	NA	NA	NA	NA	NA	NA	NA	-0.287013	0.0860581	NA	NA	NA	NA
AKR1C3	NA	NA	NA	NA	NA	NA	NA	NA	NA	NA	NA	NA	NA	NA	NA	NA	NA	NA	NA	NA	NA	NA	NA	NA	-0.524619	0.000511211	NA	NA	NA	NA
AKR7A2	NA	NA	NA	NA	-0.269077	1	NA	NA	NA	NA	NA	NA	NA	NA	NA	NA	NA	NA	NA	NA	NA	NA	NA	NA	NA	NA	NA	NA	NA	NA
AL034397.3	-0.497631	1.28014e-47	NA	NA	NA	NA	NA	NA	NA	NA	NA	NA	NA	NA	NA	NA	NA	NA	NA	NA	NA	NA	NA	NA	NA	NA	-0.938191	1	NA	NA
AL118516.1	-1.36332	2.56227e-140	-0.736188	1.5465e-12	-0.863295	0.000914851	NA	NA	NA	NA	NA	NA	NA	NA	NA	NA	NA	NA	NA	NA	NA	NA	NA	NA	-0.313989	0.213207	NA	NA	NA	NA
AL121603.2	-0.348677	3.17803e-35	-0.356954	8.82936e-05	NA	NA	NA	NA	NA	NA	NA	NA	NA	NA	NA	NA	NA	NA	NA	NA	NA	NA	NA	NA	NA	NA	NA	NA	NA	NA
AL121944.1	NA	NA	NA	NA	NA	NA	-0.38126	1	NA	NA	NA	NA	NA	NA	NA	NA	NA	NA	NA	NA	NA	NA	NA	NA	NA	NA	NA	NA	NA	NA
AL135925.1	NA	NA	NA	NA	NA	NA	NA	NA	NA	NA	NA	NA	NA	NA	NA	NA	NA	NA	NA	NA	NA	NA	NA	NA	-0.302127	1	NA	NA	NA	NA
AL139246.5	NA	NA	-0.766904	2.2782e-17	NA	NA	NA	NA	NA	NA	NA	NA	NA	NA	NA	NA	NA	NA	NA	NA	NA	NA	NA	NA	NA	NA	NA	NA	NA	NA
AL157895.1	NA	NA	NA	NA	NA	NA	NA	NA	NA	NA	NA	NA	NA	NA	NA	NA	NA	NA	NA	NA	NA	NA	NA	NA	-0.618899	0.054539	NA	NA	NA	NA
AL161421.1	-0.443667	3.3977e-43	NA	NA	NA	NA	NA	NA	NA	NA	NA	NA	NA	NA	NA	NA	NA	NA	NA	NA	NA	NA	NA	NA	NA	NA	NA	NA	NA	NA
AL357060.1	NA	NA	NA	NA	NA	NA	-0.272998	1	NA	NA	NA	NA	NA	NA	NA	NA	NA	NA	NA	NA	NA	NA	NA	NA	NA	NA	NA	NA	NA	NA
AL445524.1	-0.264248	6.58861e-25	NA	NA	NA	NA	NA	NA	NA	NA	NA	NA	NA	NA	NA	NA	NA	NA	NA	NA	NA	NA	NA	NA	NA	NA	NA	NA	NA	NA
AL731557.1	NA	NA	NA	NA	NA	NA	NA	NA	NA	NA	NA	NA	NA	NA	NA	NA	NA	NA	NA	NA	NA	NA	NA	NA	NA	NA	-0.529311	1	NA	NA
ALCAM	0.361487	8.27999e-70	0.256706	0.0109229	NA	NA	NA	NA	NA	NA	NA	NA	NA	NA	NA	NA	NA	NA	NA	NA	NA	NA	NA	NA	-0.331253	0.0594031	1.05588	1	NA	NA
ALDH16A1	NA	NA	NA	NA	NA	NA	NA	NA	NA	NA	NA	NA	NA	NA	NA	NA	NA	NA	NA	NA	NA	NA	NA	NA	NA	NA	-0.549989	1	NA	NA
ALDH1A1	-0.523528	5.15413e-31	NA	NA	NA	NA	NA	NA	NA	NA	NA	NA	NA	NA	NA	NA	NA	NA	NA	NA	NA	NA	NA	NA	-0.486647	0.00332675	NA	NA	NA	NA
ALDH2	NA	NA	0.595765	0.00210532	-0.409588	1	-0.302348	1	NA	NA	NA	NA	NA	NA	NA	NA	NA	NA	NA	NA	NA	NA	NA	NA	-0.434001	0.00388766	NA	NA	NA	NA
ALDOA	NA	NA	NA	NA	NA	NA	NA	NA	NA	NA	NA	NA	NA	NA	NA	NA	NA	NA	NA	NA	NA	NA	NA	NA	NA	NA	-0.710816	1	NA	NA
ALG13	NA	NA	NA	NA	-0.333109	1	NA	NA	NA	NA	NA	NA	NA	NA	NA	NA	NA	NA	NA	NA	NA	NA	NA	NA	NA	NA	NA	NA	NA	NA
ALKBH7	-0.289723	1.32777e-55	-0.27333	1	NA	NA	NA	NA	NA	NA	NA	NA	NA	NA	0.264042	1	NA	NA	NA	NA	NA	NA	NA	NA	NA	NA	NA	NA	-0.302441	1
ALOX12	NA	NA	NA	NA	NA	NA	NA	NA	NA	NA	NA	NA	NA	NA	NA	NA	NA	NA	NA	NA	NA	NA	NA	NA	NA	NA	-1.66594	1	NA	NA
ALYREF	NA	NA	NA	NA	NA	NA	-0.339258	1	NA	NA	NA	NA	NA	NA	0.405109	1	NA	NA	NA	NA	NA	NA	NA	NA	NA	NA	1.21965	1	NA	NA
AMD1	-0.660157	9.08049e-71	-0.873019	2.60118e-18	-0.620693	0.00857413	-0.481541	0.0666087	NA	NA	NA	NA	NA	NA	0.462051	0.0181573	NA	NA	NA	NA	NA	NA	NA	NA	-0.746564	0.00462228	-1.64473	1	NA	NA
AMFR	NA	NA	NA	NA	NA	NA	NA	NA	NA	NA	NA	NA	NA	NA	NA	NA	NA	NA	NA	NA	NA	NA	NA	NA	NA	NA	-0.873575	1	NA	NA
AMPD2	NA	NA	-0.251253	1	NA	NA	NA	NA	NA	NA	NA	NA	NA	NA	NA	NA	NA	NA	NA	NA	NA	NA	NA	NA	NA	NA	NA	NA	NA	NA
AMZ2	NA	NA	NA	NA	-0.387064	1	NA	NA	NA	NA	NA	NA	NA	NA	NA	NA	NA	NA	NA	NA	NA	NA	NA	NA	NA	NA	1.05588	1	NA	NA
ANAPC11	NA	NA	0.250216	1	0.454466	1	-0.351275	1	NA	NA	NA	NA	NA	NA	NA	NA	NA	NA	NA	NA	NA	NA	NA	NA	NA	NA	-0.69078	1	NA	NA
ANAPC13	NA	NA	NA	NA	NA	NA	-0.265657	1	NA	NA	NA	NA	NA	NA	NA	NA	NA	NA	NA	NA	NA	NA	NA	NA	NA	NA	NA	NA	NA	NA
ANAPC15	NA	NA	NA	NA	NA	NA	-0.259577	1	NA	NA	NA	NA	NA	NA	NA	NA	NA	NA	NA	NA	NA	NA	NA	NA	NA	NA	NA	NA	NA	NA
ANAPC5	NA	NA	NA	NA	NA	NA	NA	NA	NA	NA	NA	NA	NA	NA	-0.330416	1	NA	NA	NA	NA	NA	NA	NA	NA	NA	NA	0.777564	1	NA	NA
ANGPT1	NA	NA	NA	NA	NA	NA	NA	NA	NA	NA	NA	NA	NA	NA	NA	NA	NA	NA	NA	NA	NA	NA	NA	NA	-0.406525	0.15223	NA	NA	NA	NA
ANK1	NA	NA	NA	NA	NA	NA	NA	NA	NA	NA	NA	NA	NA	NA	NA	NA	NA	NA	NA	NA	NA	NA	NA	NA	NA	NA	-0.946019	1	NA	NA
ANK3	NA	NA	NA	NA	NA	NA	NA	NA	NA	NA	NA	NA	NA	NA	-0.266235	1	NA	NA	NA	NA	NA	NA	NA	NA	0.309484	1	2.04907	1	0.884369	0.248148
ANKLE2	NA	NA	NA	NA	NA	NA	-0.45508	1	NA	NA	NA	NA	NA	NA	NA	NA	NA	NA	NA	NA	NA	NA	NA	NA	-0.322458	0.438597	-0.54222	1	0.468784	1
ANKRD11	NA	NA	NA	NA	-0.488075	1	-0.683516	1	NA	NA	NA	NA	NA	NA	-0.462293	1	NA	NA	NA	NA	NA	NA	NA	NA	NA	NA	NA	NA	0.67436	0.0243583
ANKRD12	0.356148	7.65402e-40	NA	NA	NA	NA	NA	NA	NA	NA	NA	NA	NA	NA	-0.335568	1	NA	NA	NA	NA	NA	NA	NA	NA	NA	NA	2.16347	1	0.832253	6.92492e-07
ANKRD13D	NA	NA	-0.275793	1	NA	NA	NA	NA	NA	NA	NA	NA	NA	NA	NA	NA	NA	NA	NA	NA	NA	NA	NA	NA	NA	NA	1.05588	1	NA	NA
ANKRD17	NA	NA	NA	NA	NA	NA	-0.313845	1	NA	NA	NA	NA	NA	NA	NA	NA	NA	NA	NA	NA	NA	NA	NA	NA	NA	NA	NA	NA	0.552978	0.304302
ANKRD28	0.739677	2.95256e-69	0.586762	0.0122028	0.947292	0.00281649	NA	NA	NA	NA	NA	NA	NA	NA	NA	NA	0.299385	5.55116e-17	NA	NA	NA	NA	0.37247	1	-1.15924	3.84472e-13	-0.79686	1	NA	NA
ANKRD44	NA	NA	NA	NA	NA	NA	0.293875	1	NA	NA	-0.294875	7.23013e-41	-0.252555	5.08378e-08	-0.770995	0.000204675	NA	NA	NA	NA	NA	NA	-0.285449	1	NA	NA	1.36369	1	NA	NA
ANKRD9	NA	NA	NA	NA	NA	NA	NA	NA	NA	NA	NA	NA	NA	NA	NA	NA	NA	NA	NA	NA	NA	NA	NA	NA	NA	NA	-0.919919	1	NA	NA
ANKS1A	NA	NA	NA	NA	NA	NA	NA	NA	NA	NA	NA	NA	NA	NA	NA	NA	NA	NA	NA	NA	NA	NA	NA	NA	NA	NA	-1.21039	1	NA	NA
ANO6	NA	NA	0.302527	1	NA	NA	NA	NA	NA	NA	NA	NA	NA	NA	NA	NA	NA	NA	NA	NA	NA	NA	NA	NA	NA	NA	-1.16581	1	NA	NA
ANP32A	0.333302	5.31048e-55	NA	NA	0.575723	1	NA	NA	NA	NA	NA	NA	NA	NA	NA	NA	NA	NA	NA	NA	NA	NA	NA	NA	NA	NA	-2.36486	1	NA	NA
ANP32B	NA	NA	NA	NA	0.517899	1	0.251139	1	NA	NA	NA	NA	NA	NA	NA	NA	NA	NA	NA	NA	NA	NA	NA	NA	-0.520293	0.531912	-0.668539	1	NA	NA
ANTKMT	0.345697	1.17332e-111	0.311357	7.23512e-14	0.307894	0.00112603	0.433754	1	NA	NA	NA	NA	NA	NA	-0.274342	1	NA	NA	NA	NA	NA	NA	0.255062	0.00441346	NA	NA	0.622453	1	NA	NA
ANTXR2	0.261509	1.29282e-46	NA	NA	NA	NA	NA	NA	NA	NA	NA	NA	NA	NA	NA	NA	NA	NA	NA	NA	NA	NA	NA	NA	-0.257135	1	NA	NA	NA	NA
ANXA1	0.791914	4.82879e-71	0.393996	1	0.79889	0.293354	NA	NA	-0.317296	1.71476e-78	-0.25724	8.1322e-22	NA	NA	0.408435	1	0.305029	0.430094	-0.286184	1	NA	NA	NA	NA	-1.45998	1.01447e-09	NA	NA	-0.340497	1
ANXA11	NA	NA	NA	NA	-0.314885	1	-0.450379	1	NA	NA	NA	NA	NA	NA	NA	NA	NA	NA	NA	NA	NA	NA	NA	NA	NA	NA	0.355537	1	NA	NA
ANXA2	0.688305	5.48684e-59	0.882432	1.38111e-20	0.696776	0.0412324	-0.468097	1	NA	NA	NA	NA	NA	NA	NA	NA	NA	NA	NA	NA	-0.283954	1	NA	NA	-0.42358	1	NA	NA	NA	NA
ANXA4	0.303052	2.15572e-67	NA	NA	0.586112	0.598814	NA	NA	NA	NA	NA	NA	NA	NA	NA	NA	NA	NA	NA	NA	NA	NA	NA	NA	-0.311115	1	1.572	1	NA	NA
ANXA5	NA	NA	0.431133	0.000425267	NA	NA	-0.33608	1	NA	NA	NA	NA	NA	NA	NA	NA	NA	NA	NA	NA	NA	NA	NA	NA	-0.315367	1	NA	NA	NA	NA
ANXA7	NA	NA	0.397725	2.95399e-05	0.605285	0.0965513	NA	NA	NA	NA	NA	NA	NA	NA	NA	NA	NA	NA	NA	NA	NA	NA	NA	NA	-0.602756	0.00533214	-0.488228	1	NA	NA
AOAH	-0.254201	5.49644e-48	0.505302	0.00202824	NA	NA	NA	NA	NA	NA	NA	NA	-0.277558	8.06476e-09	-0.285332	1	-0.459478	2.99934e-23	NA	NA	NA	NA	-0.262206	1	NA	NA	NA	NA	NA	NA
AP000547.3	NA	NA	NA	NA	NA	NA	NA	NA	NA	NA	NA	NA	NA	NA	NA	NA	NA	NA	NA	NA	NA	NA	NA	NA	NA	NA	-0.802295	1	NA	NA
AP001189.1	NA	NA	NA	NA	NA	NA	NA	NA	NA	NA	NA	NA	NA	NA	NA	NA	NA	NA	NA	NA	NA	NA	NA	NA	NA	NA	-2.44388	1	NA	NA
AP001453.2	NA	NA	NA	NA	NA	NA	-0.539827	0.127494	NA	NA	NA	NA	NA	NA	NA	NA	NA	NA	NA	NA	NA	NA	NA	NA	NA	NA	NA	NA	NA	NA
AP003068.2	NA	NA	NA	NA	NA	NA	NA	NA	NA	NA	NA	NA	NA	NA	NA	NA	NA	NA	NA	NA	NA	NA	NA	NA	NA	NA	-1.28337	1	NA	NA
AP1S1	NA	NA	NA	NA	NA	NA	NA	NA	NA	NA	NA	NA	NA	NA	NA	NA	NA	NA	NA	NA	NA	NA	NA	NA	NA	NA	-0.838378	1	NA	NA
AP1S2	-0.349585	5.44444e-35	NA	NA	NA	NA	-0.408702	1	NA	NA	NA	NA	NA	NA	NA	NA	NA	NA	NA	NA	-0.255252	1	NA	NA	-0.380854	0.00194085	-2.09261	1	NA	NA
AP2M1	NA	NA	NA	NA	NA	NA	NA	NA	NA	NA	NA	NA	NA	NA	NA	NA	NA	NA	NA	NA	NA	NA	NA	NA	-0.503995	0.0144481	-2.7196	1	-0.410144	1
AP2S1	NA	NA	0.33692	1	NA	NA	NA	NA	NA	NA	NA	NA	NA	NA	NA	NA	NA	NA	NA	NA	NA	NA	NA	NA	NA	NA	-1.44364	1	NA	NA
AP3M2	NA	NA	NA	NA	NA	NA	0.366178	1	NA	NA	NA	NA	NA	NA	-0.409327	1	NA	NA	NA	NA	NA	NA	NA	NA	NA	NA	3.25982	1	1.10881	1.87565e-06
AP3S1	NA	NA	NA	NA	NA	NA	-0.476459	1	NA	NA	NA	NA	NA	NA	NA	NA	NA	NA	NA	NA	NA	NA	NA	NA	NA	NA	NA	NA	NA	NA
APBB1IP	0.55088	5.11553e-85	0.304311	1	0.691804	0.00672033	NA	NA	NA	NA	NA	NA	NA	NA	-0.382564	1	NA	NA	NA	NA	NA	NA	NA	NA	NA	NA	1.73572	1	NA	NA
APEX1	NA	NA	NA	NA	-0.330497	1	0.362271	1	NA	NA	NA	NA	NA	NA	NA	NA	NA	NA	NA	NA	NA	NA	NA	NA	-0.571083	9.41134e-06	NA	NA	0.378366	1
APIP	NA	NA	NA	NA	NA	NA	0.253599	1	NA	NA	NA	NA	NA	NA	NA	NA	NA	NA	NA	NA	NA	NA	NA	NA	-0.364537	0.000892964	NA	NA	NA	NA
APLP2	NA	NA	0.649658	1.62239e-07	1.30384	5.96496e-06	NA	NA	NA	NA	NA	NA	NA	NA	NA	NA	NA	NA	NA	NA	NA	NA	0.392354	1	-0.873074	6.3961e-08	0.265065	1	NA	NA
APMAP	NA	NA	NA	NA	-0.341351	1	NA	NA	NA	NA	NA	NA	-0.271289	1.80817e-09	NA	NA	NA	NA	NA	NA	NA	NA	NA	NA	NA	NA	NA	NA	NA	NA
APOBEC3A	-1.74062	3.42982e-90	-1.36106	2.52384e-07	NA	NA	NA	NA	NA	NA	NA	NA	NA	NA	NA	NA	NA	NA	NA	NA	NA	NA	NA	NA	NA	NA	NA	NA	NA	NA
APOBEC3G	NA	NA	NA	NA	NA	NA	NA	NA	NA	NA	-0.374869	1.07895e-29	NA	NA	NA	NA	NA	NA	NA	NA	-0.257114	1	-0.250427	1	NA	NA	NA	NA	-0.627552	1
APP	NA	NA	NA	NA	NA	NA	-0.508014	1	NA	NA	NA	NA	NA	NA	NA	NA	NA	NA	NA	NA	NA	NA	NA	NA	NA	NA	-1.55911	1	NA	NA
APPL1	NA	NA	NA	NA	NA	NA	NA	NA	NA	NA	NA	NA	NA	NA	NA	NA	NA	NA	NA	NA	NA	NA	NA	NA	-0.315484	2.8705e-05	NA	NA	NA	NA
AQP10	NA	NA	NA	NA	NA	NA	NA	NA	NA	NA	NA	NA	NA	NA	NA	NA	NA	NA	NA	NA	NA	NA	NA	NA	NA	NA	-0.95942	1	NA	NA
AQP3	NA	NA	NA	NA	NA	NA	NA	NA	-0.262381	4.97072e-62	NA	NA	NA	NA	NA	NA	NA	NA	NA	NA	NA	NA	-0.394391	1	NA	NA	NA	NA	NA	NA
AREG	-2.50025	3.67277e-97	-1.40741	0.257299	-1.69695	0.0701236	-0.706839	1	-0.408736	3.98848e-70	NA	NA	NA	NA	NA	NA	NA	NA	0.462532	0.133223	NA	NA	-0.303046	1	-0.320493	1	1.88653	1	NA	NA
ARF1	NA	NA	NA	NA	0.294028	1	NA	NA	NA	NA	NA	NA	NA	NA	NA	NA	NA	NA	NA	NA	NA	NA	NA	NA	NA	NA	-2.75564	1	NA	NA
ARF3	0.266297	1.67851e-60	0.360622	0.556011	NA	NA	NA	NA	NA	NA	NA	NA	NA	NA	NA	NA	NA	NA	NA	NA	NA	NA	NA	NA	NA	NA	-1.61181	1	NA	NA
ARF4	NA	NA	NA	NA	NA	NA	NA	NA	NA	NA	NA	NA	NA	NA	NA	NA	-0.261316	1.53296e-11	NA	NA	NA	NA	NA	NA	-0.252865	1	NA	NA	NA	NA
ARF5	-0.584935	1.24044e-73	NA	NA	-0.443649	1	NA	NA	NA	NA	NA	NA	NA	NA	0.406402	1	NA	NA	NA	NA	NA	NA	-0.328347	0.48801	-0.288294	4.51678e-05	-2.08521	1	NA	NA
ARFGAP3	-0.318322	9.02922e-40	0.493285	0.00269408	NA	NA	NA	NA	NA	NA	NA	NA	NA	NA	NA	NA	NA	NA	NA	NA	NA	NA	NA	NA	NA	NA	NA	NA	NA	NA
ARFRP1	NA	NA	NA	NA	NA	NA	NA	NA	NA	NA	NA	NA	NA	NA	NA	NA	NA	NA	NA	NA	NA	NA	NA	NA	0.302886	1	-1.53541	1	NA	NA
ARG2	NA	NA	NA	NA	NA	NA	NA	NA	NA	NA	NA	NA	NA	NA	NA	NA	NA	NA	NA	NA	NA	NA	NA	NA	NA	NA	-1.38397	1	NA	NA
ARGLU1	NA	NA	NA	NA	-0.259854	1	-0.282506	1	NA	NA	NA	NA	NA	NA	-0.28151	1	NA	NA	NA	NA	NA	NA	NA	NA	0.254382	1	2.29583	1	0.53817	0.0145013
ARHGAP18	NA	NA	NA	NA	NA	NA	NA	NA	NA	NA	NA	NA	NA	NA	NA	NA	NA	NA	NA	NA	NA	NA	NA	NA	NA	NA	-1.21716	1	NA	NA
ARHGAP21	NA	NA	NA	NA	NA	NA	NA	NA	NA	NA	NA	NA	NA	NA	NA	NA	NA	NA	NA	NA	NA	NA	NA	NA	NA	NA	-0.396401	1	NA	NA
ARHGAP27	NA	NA	NA	NA	NA	NA	-0.423223	1	NA	NA	NA	NA	NA	NA	NA	NA	NA	NA	NA	NA	NA	NA	NA	NA	NA	NA	NA	NA	NA	NA
ARHGAP4	NA	NA	-0.313119	1	NA	NA	NA	NA	NA	NA	NA	NA	NA	NA	0.373131	1	NA	NA	NA	NA	NA	NA	NA	NA	NA	NA	NA	NA	NA	NA
ARHGAP45	-0.565134	6.98616e-69	-0.726893	3.20718e-16	-0.650301	0.0246498	-0.286757	1	NA	NA	NA	NA	NA	NA	0.799336	3.68743e-07	NA	NA	NA	NA	NA	NA	NA	NA	NA	NA	-1.04182	1	NA	NA
ARHGAP5	NA	NA	NA	NA	NA	NA	NA	NA	NA	NA	NA	NA	NA	NA	NA	NA	NA	NA	NA	NA	NA	NA	NA	NA	-0.296166	1	2.20652	1	0.566124	1
ARHGAP6	NA	NA	NA	NA	NA	NA	NA	NA	NA	NA	NA	NA	NA	NA	NA	NA	NA	NA	NA	NA	NA	NA	NA	NA	NA	NA	-1.4138	1	NA	NA
ARHGAP9	NA	NA	NA	NA	NA	NA	-0.259583	1	NA	NA	NA	NA	NA	NA	NA	NA	NA	NA	NA	NA	NA	NA	NA	NA	NA	NA	NA	NA	NA	NA
ARHGDIA	NA	NA	NA	NA	0.607403	0.148794	-0.258615	1	NA	NA	NA	NA	NA	NA	0.348581	1	NA	NA	NA	NA	NA	NA	NA	NA	NA	NA	-1.20087	1	NA	NA
ARHGDIB	0.636409	1.51182e-78	NA	NA	0.631181	0.00700653	NA	NA	-0.296537	2.1058e-176	NA	NA	NA	NA	NA	NA	NA	NA	-0.327659	1.66635e-14	-0.537954	0.00797794	-0.410834	0.000356764	-0.30005	1	-1.41193	1	-0.491457	1
ARHGEF12	NA	NA	NA	NA	NA	NA	NA	NA	NA	NA	NA	NA	NA	NA	NA	NA	NA	NA	NA	NA	NA	NA	NA	NA	NA	NA	-1.64799	1	NA	NA
ARHGEF2	NA	NA	NA	NA	NA	NA	NA	NA	NA	NA	NA	NA	NA	NA	NA	NA	NA	NA	NA	NA	NA	NA	NA	NA	-0.339964	0.00225502	NA	NA	NA	NA
ARHGEF6	NA	NA	NA	NA	NA	NA	NA	NA	NA	NA	NA	NA	NA	NA	-0.296098	1	NA	NA	NA	NA	NA	NA	NA	NA	NA	NA	NA	NA	NA	NA
ARHGEF7	NA	NA	NA	NA	NA	NA	-0.859134	0.000788864	NA	NA	NA	NA	NA	NA	NA	NA	NA	NA	NA	NA	NA	NA	NA	NA	NA	NA	NA	NA	NA	NA
ARID1B	NA	NA	NA	NA	-0.405969	1	NA	NA	NA	NA	NA	NA	NA	NA	NA	NA	NA	NA	NA	NA	NA	NA	NA	NA	-0.627059	0.0227994	NA	NA	NA	NA
ARID3A	NA	NA	NA	NA	-0.786082	1	-0.7469	1	NA	NA	NA	NA	NA	NA	NA	NA	NA	NA	-0.284843	1.48685e-05	NA	NA	NA	NA	-0.396363	0.836782	NA	NA	NA	NA
ARID4A	NA	NA	NA	NA	NA	NA	NA	NA	NA	NA	NA	NA	-0.254078	1.02405e-05	-0.27937	1	NA	NA	NA	NA	NA	NA	NA	NA	-0.297485	1	NA	NA	0.451205	1
ARID5A	-0.289432	9.27054e-27	NA	NA	-0.339372	1	NA	NA	NA	NA	NA	NA	NA	NA	0.310649	1	NA	NA	NA	NA	NA	NA	NA	NA	0.682978	0.0124981	3.16661	1	0.639471	0.00443132
ARL2	NA	NA	NA	NA	NA	NA	NA	NA	NA	NA	NA	NA	NA	NA	NA	NA	NA	NA	NA	NA	NA	NA	NA	NA	-0.478347	0.0149332	0.744546	1	NA	NA
ARL4A	-0.415528	1.60375e-46	-0.28342	1	NA	NA	NA	NA	NA	NA	NA	NA	-0.311075	1.29825e-10	-0.34468	1	NA	NA	NA	NA	NA	NA	NA	NA	-0.617949	0.0918517	1.0586	1	NA	NA
ARL4C	-0.532494	1.25088e-16	-1.10064	3.83995e-07	-2.01005	1.0191e-08	-0.323491	1	NA	NA	-0.280484	7.24065e-37	NA	NA	NA	NA	NA	NA	-0.330023	0.000995379	-0.334399	1	NA	NA	1.11584	0.00328957	1.56197	1	NA	NA
ARL5B	-0.263784	1.21095e-29	NA	NA	-0.341001	1	NA	NA	NA	NA	NA	NA	NA	NA	NA	NA	NA	NA	NA	NA	NA	NA	NA	NA	-0.727161	6.90655e-09	NA	NA	NA	NA
ARL6IP1	NA	NA	NA	NA	NA	NA	NA	NA	NA	NA	NA	NA	NA	NA	NA	NA	NA	NA	NA	NA	-0.273277	1	NA	NA	NA	NA	-0.774685	1	-0.259065	1
ARL6IP4	NA	NA	-0.477343	0.00634809	NA	NA	0.360764	1	NA	NA	NA	NA	NA	NA	NA	NA	NA	NA	NA	NA	NA	NA	NA	NA	NA	NA	0.79195	1	NA	NA
ARL6IP5	0.574014	4.36784e-66	0.471646	0.0484792	0.640879	1	0.27937	1	NA	NA	NA	NA	NA	NA	-0.503622	1	NA	NA	NA	NA	NA	NA	-0.379388	0.398615	NA	NA	-0.396812	1	-0.338959	0.00200416
ARL8A	0.307183	4.80259e-90	0.411942	4.95668e-05	0.383986	1	-0.388715	1	NA	NA	NA	NA	NA	NA	NA	NA	NA	NA	NA	NA	NA	NA	NA	NA	NA	NA	NA	NA	NA	NA
ARL8B	-0.320696	1.11754e-55	NA	NA	NA	NA	NA	NA	NA	NA	NA	NA	NA	NA	NA	NA	NA	NA	NA	NA	NA	NA	NA	NA	NA	NA	1.73222	1	NA	NA
ARMC7	NA	NA	NA	NA	NA	NA	NA	NA	NA	NA	NA	NA	NA	NA	NA	NA	NA	NA	NA	NA	NA	NA	NA	NA	NA	NA	-0.545952	1	NA	NA
ARMC8	NA	NA	NA	NA	NA	NA	NA	NA	NA	NA	NA	NA	NA	NA	NA	NA	NA	NA	NA	NA	NA	NA	NA	NA	NA	NA	-0.535827	1	NA	NA
ARMCX1	NA	NA	NA	NA	NA	NA	NA	NA	NA	NA	NA	NA	NA	NA	NA	NA	NA	NA	NA	NA	NA	NA	NA	NA	-0.305077	0.118931	NA	NA	NA	NA
ARMCX3	NA	NA	0.394507	1	0.29736	1	NA	NA	NA	NA	NA	NA	NA	NA	-0.266697	1	NA	NA	NA	NA	NA	NA	NA	NA	-0.304586	1	0.657241	1	NA	NA
ARMCX6	NA	NA	NA	NA	NA	NA	NA	NA	NA	NA	NA	NA	NA	NA	NA	NA	NA	NA	NA	NA	NA	NA	NA	NA	NA	NA	-1.65654	1	NA	NA
ARMH1	NA	NA	NA	NA	NA	NA	NA	NA	NA	NA	NA	NA	NA	NA	NA	NA	NA	NA	NA	NA	NA	NA	NA	NA	-0.641765	4.41561e-06	1.572	1	0.456337	1
ARPC1B	0.418557	8.18317e-31	0.373815	0.00205682	0.252849	1	NA	NA	NA	NA	NA	NA	0.353048	1.89473e-11	NA	NA	0.3114	2.39785e-14	NA	NA	NA	NA	0.342679	1	NA	NA	-2.35048	1	NA	NA
ARPC2	NA	NA	NA	NA	NA	NA	-0.389333	1	NA	NA	-0.370408	2.09962e-45	NA	NA	-0.318533	1	-0.251026	1.43096e-14	-0.349602	1.4094e-13	-0.29254	1	-0.369227	0.000303529	-0.26786	1	NA	NA	-0.281363	1
ARPC3	NA	NA	NA	NA	NA	NA	NA	NA	NA	NA	NA	NA	NA	NA	-0.298438	1	NA	NA	NA	NA	-0.394326	0.000487728	NA	NA	-0.417914	1	-2.2566	1	-0.654248	0.0176697
ARPC4	0.343905	2.54803e-30	0.449303	0.0711922	0.420335	1	NA	NA	NA	NA	NA	NA	NA	NA	NA	NA	NA	NA	NA	NA	NA	NA	NA	NA	NA	NA	-2.35215	1	NA	NA
ARPC5	0.76852	4.72186e-83	0.751907	1.2268e-14	0.745445	0.00123778	NA	NA	NA	NA	NA	NA	NA	NA	NA	NA	NA	NA	NA	NA	NA	NA	NA	NA	NA	NA	-1.29323	1	NA	NA
ARPC5L	NA	NA	NA	NA	NA	NA	-0.255906	1	NA	NA	NA	NA	NA	NA	NA	NA	NA	NA	NA	NA	NA	NA	NA	NA	NA	NA	-0.411639	1	NA	NA
ARPP19	NA	NA	NA	NA	NA	NA	NA	NA	NA	NA	NA	NA	NA	NA	NA	NA	NA	NA	NA	NA	NA	NA	0.315116	1	NA	NA	-0.768327	1	0.279075	1
ARRDC2	NA	NA	-0.41813	0.10328	-0.44073	1	NA	NA	NA	NA	NA	NA	NA	NA	0.344665	1	NA	NA	NA	NA	NA	NA	NA	NA	NA	NA	NA	NA	0.437645	0.0852692
ARRDC3	NA	NA	NA	NA	NA	NA	0.533057	1	NA	NA	NA	NA	NA	NA	-0.424357	1	NA	NA	NA	NA	0.264377	1	NA	NA	NA	NA	0.855535	1	NA	NA
ARSD	NA	NA	NA	NA	0.325382	0.420686	NA	NA	NA	NA	NA	NA	NA	NA	NA	NA	NA	NA	NA	NA	NA	NA	NA	NA	-0.368779	0.000533551	NA	NA	NA	NA
ASAH1	-0.503504	2.48273e-32	NA	NA	0.77465	0.656184	-0.297035	1	NA	NA	NA	NA	NA	NA	NA	NA	NA	NA	NA	NA	NA	NA	NA	NA	-0.649925	5.93866e-06	-1.94383	1	NA	NA
ASAP1	NA	NA	NA	NA	-0.413188	1	0.391599	1	NA	NA	NA	NA	NA	NA	NA	NA	NA	NA	NA	NA	NA	NA	NA	NA	NA	NA	-1.43418	1	NA	NA
ASB8	NA	NA	NA	NA	NA	NA	NA	NA	NA	NA	NA	NA	NA	NA	0.260038	1	NA	NA	NA	NA	NA	NA	NA	NA	NA	NA	-1.42284	1	NA	NA
ASH1L	0.293921	4.67242e-61	NA	NA	NA	NA	NA	NA	NA	NA	NA	NA	NA	NA	-0.281557	1	NA	NA	NA	NA	NA	NA	NA	NA	NA	NA	NA	NA	0.635185	0.0973733
ASNA1	-0.346138	8.42137e-46	-0.466445	8.32298e-09	-0.386004	0.473916	NA	NA	NA	NA	NA	NA	NA	NA	0.457597	2.43417e-09	NA	NA	NA	NA	NA	NA	NA	NA	NA	NA	NA	NA	NA	NA
ASPH	0.683749	1.74022e-81	0.517768	0.00306135	0.649823	0.00347662	NA	NA	NA	NA	NA	NA	NA	NA	NA	NA	NA	NA	NA	NA	NA	NA	NA	NA	-0.262709	0.383248	NA	NA	NA	NA
ATE1	NA	NA	NA	NA	NA	NA	NA	NA	NA	NA	NA	NA	NA	NA	-0.349257	1	NA	NA	NA	NA	NA	NA	NA	NA	NA	NA	0.781553	1	NA	NA
ATF3	NA	NA	-0.332254	1	NA	NA	0.754204	1	NA	NA	NA	NA	NA	NA	NA	NA	0.288955	8.37526e-07	NA	NA	0.292164	1	0.429407	1	NA	NA	NA	NA	NA	NA
ATF4	NA	NA	NA	NA	-0.257527	1	0.385705	1	0.374236	5.67193e-178	0.260863	1.6265e-51	NA	NA	0.450272	1	0.284311	9.29241e-13	0.317073	2.6548e-07	0.393796	1	0.252751	1	NA	NA	0.660113	1	NA	NA
ATF5	NA	NA	NA	NA	-0.272833	1	-0.254308	1	NA	NA	NA	NA	NA	NA	NA	NA	NA	NA	NA	NA	NA	NA	NA	NA	NA	NA	NA	NA	NA	NA
ATF7IP	NA	NA	NA	NA	NA	NA	NA	NA	NA	NA	NA	NA	NA	NA	-0.288854	1	NA	NA	NA	NA	NA	NA	NA	NA	NA	NA	NA	NA	NA	NA
ATF7IP2	NA	NA	NA	NA	NA	NA	0.489285	1	NA	NA	NA	NA	NA	NA	-0.340629	1	NA	NA	NA	NA	NA	NA	NA	NA	-0.301539	0.20021	NA	NA	0.272516	1
ATG16L2	NA	NA	NA	NA	NA	NA	NA	NA	NA	NA	NA	NA	NA	NA	NA	NA	NA	NA	NA	NA	NA	NA	NA	NA	-0.356593	0.35563	NA	NA	NA	NA
ATG2A	NA	NA	-0.375088	0.854408	-0.343643	1	NA	NA	NA	NA	NA	NA	NA	NA	NA	NA	NA	NA	NA	NA	NA	NA	NA	NA	NA	NA	1.05588	1	NA	NA
ATL1	NA	NA	NA	NA	NA	NA	NA	NA	NA	NA	NA	NA	NA	NA	NA	NA	NA	NA	NA	NA	NA	NA	NA	NA	NA	NA	-1.24986	1	NA	NA
ATM	NA	NA	NA	NA	NA	NA	NA	NA	NA	NA	NA	NA	NA	NA	-0.563973	1	NA	NA	NA	NA	NA	NA	NA	NA	0.572507	1	1.42937	1	0.742265	0.00238366
ATP13A3	-0.524248	4.05153e-58	NA	NA	NA	NA	-0.271233	1	NA	NA	NA	NA	NA	NA	-0.269479	1	NA	NA	NA	NA	NA	NA	NA	NA	NA	NA	NA	NA	NA	NA
ATP1B1	NA	NA	NA	NA	-0.424687	1	NA	NA	NA	NA	NA	NA	NA	NA	NA	NA	NA	NA	NA	NA	NA	NA	NA	NA	-0.467726	0.0112092	NA	NA	NA	NA
ATP1B3	-0.924115	1.69402e-94	-0.360609	1	-1.17785	0.349496	-0.33244	1	NA	NA	NA	NA	NA	NA	NA	NA	NA	NA	-0.307078	0.0112662	0.297921	1	NA	NA	NA	NA	1.23439	1	NA	NA
ATP2A3	NA	NA	NA	NA	NA	NA	NA	NA	NA	NA	NA	NA	NA	NA	NA	NA	NA	NA	NA	NA	0.392226	0.00675393	NA	NA	NA	NA	-2.23501	1	NA	NA
ATP2B1	NA	NA	NA	NA	0.715543	1	-0.264621	1	NA	NA	NA	NA	NA	NA	NA	NA	NA	NA	NA	NA	-0.443796	1	NA	NA	-0.972067	3.27862e-05	NA	NA	-0.369186	1
ATP2B1-AS1	-3.73578	0	-2.92792	5.99163e-36	-0.877292	0.295388	NA	NA	NA	NA	NA	NA	NA	NA	NA	NA	NA	NA	NA	NA	NA	NA	NA	NA	-0.608714	0.0775872	NA	NA	NA	NA
ATP2B4	0.264957	2.67005e-74	0.251165	3.2437e-06	NA	NA	NA	NA	NA	NA	NA	NA	NA	NA	NA	NA	NA	NA	NA	NA	NA	NA	NA	NA	-0.537692	0.00105061	NA	NA	NA	NA
ATP2C1	NA	NA	NA	NA	NA	NA	NA	NA	NA	NA	NA	NA	NA	NA	NA	NA	NA	NA	NA	NA	NA	NA	NA	NA	-0.471426	0.00446992	-1.66049	1	NA	NA
ATP5F1A	NA	NA	NA	NA	0.272609	1	NA	NA	NA	NA	NA	NA	NA	NA	NA	NA	NA	NA	NA	NA	NA	NA	NA	NA	-0.599246	1.50625e-07	NA	NA	-0.365977	1
ATP5F1B	NA	NA	NA	NA	NA	NA	NA	NA	NA	NA	NA	NA	NA	NA	NA	NA	NA	NA	NA	NA	NA	NA	NA	NA	-0.54059	0.000152503	-0.797602	1	NA	NA
ATP5F1C	NA	NA	NA	NA	NA	NA	NA	NA	NA	NA	NA	NA	NA	NA	0.411335	1	NA	NA	NA	NA	NA	NA	NA	NA	-0.488758	0.160553	-1.6768	1	NA	NA
ATP5F1D	-0.443685	5.22626e-69	-0.427025	0.0981035	-0.288642	1	NA	NA	NA	NA	NA	NA	NA	NA	NA	NA	NA	NA	NA	NA	NA	NA	NA	NA	NA	NA	0.90137	1	-0.28152	1
ATP5F1E	NA	NA	0.747223	2.70465e-19	0.496056	0.038527	0.457117	1	NA	NA	NA	NA	NA	NA	NA	NA	NA	NA	NA	NA	NA	NA	NA	NA	NA	NA	-0.299614	1	-0.426491	0.120999
ATP5MC1	NA	NA	NA	NA	NA	NA	NA	NA	NA	NA	NA	NA	NA	NA	NA	NA	NA	NA	NA	NA	0.360051	1	NA	NA	-0.289949	0.897862	NA	NA	NA	NA
ATP5MC2	-0.432965	1.99249e-48	-0.307237	1	NA	NA	NA	NA	NA	NA	NA	NA	NA	NA	NA	NA	NA	NA	NA	NA	NA	NA	NA	NA	-0.468814	0.147989	-1.41795	1	-0.488959	0.63042
ATP5MC3	NA	NA	NA	NA	NA	NA	NA	NA	NA	NA	NA	NA	NA	NA	0.369608	1	NA	NA	NA	NA	NA	NA	NA	NA	-0.360194	0.165088	NA	NA	NA	NA
ATP5MD	0.532055	6.82198e-52	0.418815	0.110969	1.09011	1.50274e-10	0.302807	1	NA	NA	NA	NA	NA	NA	NA	NA	NA	NA	NA	NA	NA	NA	NA	NA	NA	NA	-1.27395	1	NA	NA
ATP5ME	0.653528	5.38585e-66	0.772165	2.86967e-14	1.01915	2.37626e-07	0.758729	8.59277e-07	0.259282	4.52952e-64	NA	NA	NA	NA	0.275266	1	0.285009	8.18063e-08	0.276175	3.73323e-07	0.417534	0.747362	0.253135	1	NA	NA	-0.589958	1	NA	NA
ATP5MG	NA	NA	NA	NA	NA	NA	NA	NA	NA	NA	NA	NA	NA	NA	0.351224	1	NA	NA	NA	NA	NA	NA	NA	NA	NA	NA	NA	NA	-0.771489	2.13551e-05
ATP5MPL	0.426936	4.41392e-35	0.569936	2.18976e-06	0.58135	0.00992453	NA	NA	NA	NA	NA	NA	NA	NA	0.366311	1	NA	NA	NA	NA	NA	NA	NA	NA	-0.321083	0.176047	-1.89501	1	NA	NA
ATP5PB	NA	NA	NA	NA	NA	NA	NA	NA	NA	NA	NA	NA	NA	NA	0.27865	1	NA	NA	NA	NA	NA	NA	NA	NA	NA	NA	-0.761603	1	NA	NA
ATP5PD	0.342369	5.53493e-37	NA	NA	0.736339	0.0011018	0.449126	1	NA	NA	NA	NA	NA	NA	NA	NA	NA	NA	NA	NA	NA	NA	0.291068	1	NA	NA	-0.25766	1	-0.363536	1
ATP5PF	NA	NA	NA	NA	0.362534	1	NA	NA	NA	NA	NA	NA	NA	NA	NA	NA	NA	NA	NA	NA	0.331367	1	NA	NA	-0.51335	0.0305004	-0.609789	1	-0.323515	1
ATP5PO	NA	NA	-0.314824	0.995372	NA	NA	NA	NA	NA	NA	NA	NA	NA	NA	NA	NA	NA	NA	NA	NA	NA	NA	NA	NA	NA	NA	-1.41768	1	NA	NA
ATP5S	-0.279112	7.42572e-31	-0.296307	0.000290765	NA	NA	-0.310393	0.242439	NA	NA	NA	NA	NA	NA	0.340849	1	NA	NA	NA	NA	NA	NA	NA	NA	NA	NA	NA	NA	NA	NA
ATP6AP1	NA	NA	0.401281	0.0705975	NA	NA	NA	NA	NA	NA	NA	NA	NA	NA	0.28308	1	NA	NA	NA	NA	NA	NA	NA	NA	-0.35567	0.274894	-1.2309	1	NA	NA
ATP6AP2	NA	NA	0.332318	1	0.543649	1	-0.285227	1	NA	NA	NA	NA	NA	NA	NA	NA	NA	NA	NA	NA	NA	NA	NA	NA	NA	NA	NA	NA	NA	NA
ATP6V0B	NA	NA	0.362138	1	0.40001	1	-0.289592	1	NA	NA	NA	NA	NA	NA	0.440506	1	NA	NA	NA	NA	NA	NA	NA	NA	-0.400367	0.171444	0.319733	1	NA	NA
ATP6V0D1	0.277407	1.38364e-29	NA	NA	0.627627	0.147304	NA	NA	NA	NA	NA	NA	NA	NA	NA	NA	NA	NA	NA	NA	NA	NA	NA	NA	NA	NA	-1.51022	1	-0.255593	1
ATP6V0E1	0.317519	7.38023e-32	0.524047	6.81688e-06	0.430541	1	NA	NA	NA	NA	NA	NA	NA	NA	NA	NA	NA	NA	NA	NA	NA	NA	NA	NA	NA	NA	-3.10306	1	NA	NA
ATP6V1F	-0.475583	2.47739e-55	NA	NA	NA	NA	-0.432259	1	NA	NA	NA	NA	NA	NA	NA	NA	NA	NA	NA	NA	NA	NA	NA	NA	-0.391541	0.0049099	NA	NA	-0.263417	1
ATP6V1G1	NA	NA	NA	NA	0.394964	1	NA	NA	NA	NA	NA	NA	NA	NA	NA	NA	-0.251014	5.89504e-20	NA	NA	-0.265437	1	NA	NA	NA	NA	0.399206	1	NA	NA
ATP8B4	NA	NA	NA	NA	NA	NA	NA	NA	NA	NA	NA	NA	NA	NA	NA	NA	NA	NA	NA	NA	NA	NA	NA	NA	-0.739	2.38028e-06	NA	NA	NA	NA
ATP9A	NA	NA	NA	NA	NA	NA	NA	NA	NA	NA	NA	NA	NA	NA	NA	NA	NA	NA	NA	NA	NA	NA	NA	NA	NA	NA	-0.700075	1	NA	NA
ATPAF1	NA	NA	NA	NA	NA	NA	NA	NA	NA	NA	NA	NA	NA	NA	NA	NA	NA	NA	NA	NA	NA	NA	NA	NA	NA	NA	-1.01673	1	NA	NA
ATPAF2	NA	NA	NA	NA	NA	NA	-0.304264	1	NA	NA	NA	NA	NA	NA	NA	NA	NA	NA	NA	NA	NA	NA	NA	NA	NA	NA	NA	NA	NA	NA
ATR	NA	NA	NA	NA	NA	NA	NA	NA	NA	NA	NA	NA	NA	NA	-0.390691	1	NA	NA	NA	NA	NA	NA	NA	NA	NA	NA	NA	NA	0.590146	1
ATRX	NA	NA	NA	NA	0.307073	1	NA	NA	NA	NA	NA	NA	NA	NA	-0.332017	1	NA	NA	NA	NA	NA	NA	NA	NA	NA	NA	1.118	1	0.531242	0.286198
ATXN1	NA	NA	0.266179	0.000299504	0.34131	1	NA	NA	NA	NA	NA	NA	NA	NA	-0.331957	1	NA	NA	NA	NA	NA	NA	NA	NA	NA	NA	0.802393	1	NA	NA
ATXN10	NA	NA	NA	NA	NA	NA	NA	NA	NA	NA	NA	NA	NA	NA	-0.263013	1	NA	NA	NA	NA	NA	NA	NA	NA	-0.345332	0.135124	NA	NA	NA	NA
ATXN2	NA	NA	NA	NA	NA	NA	NA	NA	NA	NA	NA	NA	NA	NA	NA	NA	NA	NA	NA	NA	NA	NA	NA	NA	-0.342705	0.731116	NA	NA	NA	NA
ATXN2L	NA	NA	NA	NA	NA	NA	-0.262638	1	NA	NA	NA	NA	NA	NA	NA	NA	NA	NA	NA	NA	NA	NA	NA	NA	NA	NA	1.05516	1	NA	NA
ATXN7L3B	NA	NA	NA	NA	0.38867	1	NA	NA	NA	NA	NA	NA	NA	NA	-0.364886	1	NA	NA	NA	NA	NA	NA	NA	NA	-0.410204	0.0358738	NA	NA	0.479773	1
AURKAIP1	NA	NA	NA	NA	0.285304	1	NA	NA	NA	NA	NA	NA	NA	NA	0.324502	1	NA	NA	NA	NA	0.25026	1	NA	NA	NA	NA	-1.24933	1	NA	NA
AUTS2	NA	NA	NA	NA	NA	NA	NA	NA	NA	NA	-0.300551	2.18825e-20	NA	NA	NA	NA	NA	NA	NA	NA	NA	NA	NA	NA	NA	NA	NA	NA	-0.322584	1
AVP	NA	NA	NA	NA	NA	NA	NA	NA	NA	NA	NA	NA	NA	NA	NA	NA	NA	NA	NA	NA	NA	NA	NA	NA	-0.976831	0.180893	NA	NA	NA	NA
AVPI1	NA	NA	NA	NA	-0.322996	1	NA	NA	NA	NA	NA	NA	NA	NA	NA	NA	NA	NA	NA	NA	NA	NA	NA	NA	NA	NA	NA	NA	NA	NA
AXL	NA	NA	NA	NA	-0.697868	1	NA	NA	NA	NA	NA	NA	NA	NA	NA	NA	NA	NA	NA	NA	NA	NA	NA	NA	NA	NA	NA	NA	NA	NA
AZIN1	-0.267242	6.41383e-50	-0.279676	1	0.343685	0.17313	NA	NA	NA	NA	NA	NA	NA	NA	NA	NA	NA	NA	NA	NA	NA	NA	NA	NA	NA	NA	0.413811	1	NA	NA
B2M	NA	NA	NA	NA	-0.35214	1	-0.259755	1	NA	NA	-0.349595	3.07763e-132	NA	NA	-0.269262	0.549869	-0.262434	5.40364e-95	NA	NA	NA	NA	NA	NA	0.425123	1	-1.10496	1	-0.74872	6.9631e-12
B3GNT5	-0.838133	4.07795e-63	-0.465716	1	-0.268714	1	NA	NA	NA	NA	NA	NA	NA	NA	NA	NA	NA	NA	NA	NA	NA	NA	NA	NA	NA	NA	NA	NA	NA	NA
B3GNT7	NA	NA	NA	NA	NA	NA	NA	NA	NA	NA	NA	NA	NA	NA	NA	NA	-0.307009	6.83176e-09	NA	NA	NA	NA	-0.276041	1	NA	NA	NA	NA	NA	NA
B4GALT1	-0.669832	2.5311e-82	-0.337553	1	-0.379947	1	-0.282814	1	NA	NA	NA	NA	NA	NA	0.250063	1	NA	NA	NA	NA	NA	NA	NA	NA	NA	NA	-1.22066	1	NA	NA
BAALC	NA	NA	NA	NA	NA	NA	NA	NA	NA	NA	NA	NA	NA	NA	NA	NA	NA	NA	NA	NA	NA	NA	NA	NA	-0.775916	2.65413e-06	NA	NA	NA	NA
BAD	NA	NA	NA	NA	NA	NA	NA	NA	NA	NA	NA	NA	NA	NA	NA	NA	NA	NA	NA	NA	NA	NA	NA	NA	NA	NA	-1.36559	1	NA	NA
BAG5	NA	NA	NA	NA	NA	NA	-0.389511	1	NA	NA	NA	NA	NA	NA	NA	NA	NA	NA	NA	NA	NA	NA	NA	NA	NA	NA	NA	NA	0.283033	1
BAG6	NA	NA	NA	NA	NA	NA	NA	NA	NA	NA	NA	NA	NA	NA	NA	NA	NA	NA	NA	NA	NA	NA	NA	NA	-0.255245	1	1.89785	1	NA	NA
BAIAP2	NA	NA	NA	NA	-0.678037	0.0302442	-0.312992	1	NA	NA	NA	NA	NA	NA	NA	NA	NA	NA	NA	NA	NA	NA	NA	NA	NA	NA	NA	NA	NA	NA
BANF1	NA	NA	NA	NA	0.272493	1	NA	NA	NA	NA	NA	NA	NA	NA	NA	NA	NA	NA	NA	NA	NA	NA	NA	NA	-0.32938	0.000415574	NA	NA	NA	NA
BANK1	NA	NA	NA	NA	NA	NA	NA	NA	NA	NA	NA	NA	NA	NA	NA	NA	NA	NA	NA	NA	-0.332852	1	NA	NA	NA	NA	-1.37442	1	NA	NA
BANP	NA	NA	NA	NA	-0.289123	1	NA	NA	NA	NA	NA	NA	NA	NA	NA	NA	NA	NA	NA	NA	NA	NA	NA	NA	NA	NA	1.52024	1	NA	NA
BARD1	NA	NA	NA	NA	NA	NA	-0.280574	1	NA	NA	NA	NA	NA	NA	NA	NA	NA	NA	NA	NA	NA	NA	NA	NA	NA	NA	NA	NA	NA	NA
BASP1	-1.33063	2.22606e-95	-0.735261	1	-1.51402	0.0025615	-0.323618	1	NA	NA	NA	NA	NA	NA	NA	NA	NA	NA	NA	NA	NA	NA	NA	NA	NA	NA	NA	NA	NA	NA
BATF3	-0.303626	8.72481e-12	-0.446867	0.856458	NA	NA	NA	NA	NA	NA	NA	NA	NA	NA	NA	NA	NA	NA	NA	NA	NA	NA	NA	NA	NA	NA	NA	NA	NA	NA
BAX	NA	NA	NA	NA	NA	NA	NA	NA	NA	NA	NA	NA	NA	NA	NA	NA	NA	NA	NA	NA	NA	NA	NA	NA	NA	NA	-1.22259	1	NA	NA
BAZ1A	0.309739	1.54964e-51	0.332718	1	NA	NA	NA	NA	0.287824	2.10226e-79	NA	NA	NA	NA	NA	NA	NA	NA	NA	NA	NA	NA	NA	NA	0.522348	1	0.457965	1	1.02527	2.77495e-05
BAZ2B	0.491502	5.63851e-75	NA	NA	NA	NA	-0.375995	1	NA	NA	NA	NA	NA	NA	NA	NA	NA	NA	NA	NA	NA	NA	NA	NA	-0.437952	0.000608853	1.21965	1	0.505679	1
BBX	NA	NA	NA	NA	NA	NA	NA	NA	NA	NA	NA	NA	NA	NA	-0.289998	1	NA	NA	NA	NA	NA	NA	NA	NA	NA	NA	0.737875	1	NA	NA
BCAP29	NA	NA	-0.301114	0.218609	NA	NA	NA	NA	NA	NA	NA	NA	NA	NA	NA	NA	NA	NA	NA	NA	NA	NA	NA	NA	-0.275782	0.0566368	NA	NA	NA	NA
BCAP31	NA	NA	NA	NA	0.288194	1	NA	NA	NA	NA	NA	NA	NA	NA	-0.293889	1	NA	NA	NA	NA	NA	NA	NA	NA	-0.650242	4.6818e-07	-1.51948	1	NA	NA
BCAR3	NA	NA	NA	NA	-0.284855	1	NA	NA	NA	NA	NA	NA	NA	NA	NA	NA	NA	NA	NA	NA	NA	NA	NA	NA	NA	NA	NA	NA	NA	NA
BCAS2	NA	NA	NA	NA	-0.257531	1	NA	NA	NA	NA	NA	NA	NA	NA	-0.437678	1	-0.280913	5.99773e-13	NA	NA	NA	NA	NA	NA	NA	NA	1.11452	1	NA	NA
BCAT1	NA	NA	NA	NA	NA	NA	NA	NA	NA	NA	NA	NA	NA	NA	NA	NA	NA	NA	NA	NA	NA	NA	NA	NA	-0.323796	0.158177	NA	NA	NA	NA
BCL10	0.476673	1.95713e-92	NA	NA	NA	NA	NA	NA	NA	NA	NA	NA	NA	NA	-0.461202	1	NA	NA	NA	NA	NA	NA	NA	NA	NA	NA	NA	NA	NA	NA
BCL11A	NA	NA	NA	NA	NA	NA	NA	NA	NA	NA	NA	NA	NA	NA	NA	NA	NA	NA	NA	NA	NA	NA	NA	NA	-0.569702	0.000708266	NA	NA	NA	NA
BCL11B	0.278694	0.180864	NA	NA	NA	NA	0.273482	1	NA	NA	NA	NA	NA	NA	-0.781344	0.00423824	NA	NA	NA	NA	NA	NA	NA	NA	1.37171	7.66388e-08	2.93288	1	1.50464	5.88126e-21
BCL2A1	-1.09186	1.71598e-68	-0.813444	0.000219332	NA	NA	-0.529134	1	NA	NA	NA	NA	0.692791	2.88405e-19	-0.332739	1	NA	NA	-0.297984	0.000102961	NA	NA	NA	NA	NA	NA	NA	NA	NA	NA
BCL2L1	NA	NA	NA	NA	NA	NA	NA	NA	NA	NA	NA	NA	NA	NA	NA	NA	NA	NA	NA	NA	NA	NA	NA	NA	NA	NA	-2.09769	1	NA	NA
BCL3	-0.299771	1.15778e-61	-0.257647	1	NA	NA	NA	NA	NA	NA	NA	NA	NA	NA	-0.281193	1	NA	NA	NA	NA	NA	NA	NA	NA	-0.442168	1	0.891388	1	0.297579	1
BCL7B	NA	NA	-0.255171	0.715462	NA	NA	NA	NA	NA	NA	NA	NA	NA	NA	NA	NA	NA	NA	NA	NA	NA	NA	NA	NA	NA	NA	-0.819843	1	NA	NA
BCLAF1	0.500385	8.65474e-58	NA	NA	NA	NA	NA	NA	NA	NA	NA	NA	-0.268925	3.87923e-12	NA	NA	NA	NA	NA	NA	NA	NA	NA	NA	NA	NA	NA	NA	NA	NA
BCOR	NA	NA	NA	NA	-0.280131	1	NA	NA	NA	NA	NA	NA	NA	NA	NA	NA	NA	NA	NA	NA	NA	NA	NA	NA	-0.337673	0.540674	0.457965	1	NA	NA
BCR	NA	NA	NA	NA	NA	NA	NA	NA	NA	NA	NA	NA	NA	NA	NA	NA	NA	NA	NA	NA	NA	NA	NA	NA	-0.368596	0.620348	NA	NA	-0.309972	1
BDP1	NA	NA	NA	NA	NA	NA	NA	NA	NA	NA	NA	NA	NA	NA	-0.356819	1	NA	NA	NA	NA	0.26444	1	NA	NA	NA	NA	1.35269	1	0.633843	1
BEND2	NA	NA	NA	NA	NA	NA	NA	NA	NA	NA	NA	NA	NA	NA	NA	NA	NA	NA	NA	NA	NA	NA	NA	NA	NA	NA	-1.98947	1	NA	NA
BET1	NA	NA	NA	NA	NA	NA	NA	NA	NA	NA	NA	NA	NA	NA	NA	NA	NA	NA	NA	NA	NA	NA	NA	NA	NA	NA	-1.94721	1	NA	NA
BEX1	NA	NA	NA	NA	NA	NA	NA	NA	NA	NA	NA	NA	NA	NA	NA	NA	NA	NA	NA	NA	NA	NA	NA	NA	-0.734573	0.00518527	NA	NA	NA	NA
BEX2	NA	NA	NA	NA	NA	NA	0.301804	1	NA	NA	NA	NA	NA	NA	NA	NA	NA	NA	NA	NA	NA	NA	NA	NA	-0.29983	0.0115559	NA	NA	0.550597	1
BEX3	NA	NA	NA	NA	NA	NA	0.314936	1	NA	NA	NA	NA	NA	NA	NA	NA	NA	NA	NA	NA	NA	NA	NA	NA	-0.532824	0.000446443	-1.90824	1	NA	NA
BEX4	NA	NA	NA	NA	NA	NA	NA	NA	NA	NA	NA	NA	NA	NA	NA	NA	NA	NA	NA	NA	NA	NA	NA	NA	-0.519824	0.000109435	-1.00931	1	NA	NA
BHLHE40	-0.61756	7.11532e-50	NA	NA	-0.711397	1	NA	NA	NA	NA	-0.266022	2.93604e-13	NA	NA	-0.407068	1	NA	NA	NA	NA	NA	NA	0.564677	0.163576	-0.914442	2.91987e-06	NA	NA	-0.585733	1
BICD2	NA	NA	NA	NA	NA	NA	NA	NA	NA	NA	NA	NA	NA	NA	NA	NA	NA	NA	NA	NA	NA	NA	NA	NA	NA	NA	-0.828719	1	NA	NA
BID	NA	NA	NA	NA	-0.715427	0.811695	NA	NA	NA	NA	NA	NA	NA	NA	NA	NA	NA	NA	NA	NA	NA	NA	NA	NA	NA	NA	1.06461	1	NA	NA
BIN1	NA	NA	NA	NA	-0.978734	0.0186396	NA	NA	NA	NA	NA	NA	NA	NA	NA	NA	NA	NA	NA	NA	NA	NA	NA	NA	NA	NA	NA	NA	NA	NA
BIN2	NA	NA	NA	NA	0.314258	1	NA	NA	NA	NA	-0.302648	7.47254e-44	-0.2597	5.93519e-17	-0.331502	1	-0.259928	1.57661e-21	NA	NA	NA	NA	NA	NA	-0.271774	1	-2.26242	1	-0.307486	1
BIRC3	NA	NA	NA	NA	-0.409106	1	0.466085	1	NA	NA	NA	NA	NA	NA	-1.00344	2.67228e-06	NA	NA	0.295866	1	0.344055	1	NA	NA	0.283698	1	NA	NA	NA	NA
BLOC1S6	0.491271	1.04904e-44	NA	NA	0.472395	1	NA	NA	NA	NA	NA	NA	NA	NA	-0.286103	1	NA	NA	NA	NA	NA	NA	NA	NA	NA	NA	0.562282	1	NA	NA
BLVRA	NA	NA	NA	NA	0.406207	1	NA	NA	NA	NA	NA	NA	NA	NA	NA	NA	NA	NA	NA	NA	NA	NA	NA	NA	-0.411533	0.0472907	NA	NA	NA	NA
BLVRB	NA	NA	0.810389	5.56942e-09	0.671979	0.525205	-0.340328	1	NA	NA	NA	NA	NA	NA	0.27275	1	NA	NA	NA	NA	NA	NA	-0.257346	1	-0.326985	0.0905486	NA	NA	NA	NA
BMP2K	NA	NA	0.274946	0.040708	NA	NA	NA	NA	NA	NA	NA	NA	NA	NA	NA	NA	NA	NA	NA	NA	NA	NA	NA	NA	-0.313605	1	NA	NA	NA	NA
BNIP2	0.466797	4.80699e-48	0.464787	0.590412	0.509089	1	NA	NA	NA	NA	NA	NA	NA	NA	NA	NA	NA	NA	NA	NA	NA	NA	NA	NA	NA	NA	-1.65897	1	NA	NA
BNIP3	NA	NA	NA	NA	NA	NA	NA	NA	NA	NA	NA	NA	NA	NA	NA	NA	NA	NA	NA	NA	NA	NA	NA	NA	NA	NA	-1.0092	1	NA	NA
BNIP3L	-0.347685	1.01902e-60	NA	NA	NA	NA	NA	NA	NA	NA	NA	NA	NA	NA	-0.278739	1	NA	NA	NA	NA	NA	NA	NA	NA	-0.392563	0.412847	0.43137	1	NA	NA
BOD1L1	NA	NA	NA	NA	NA	NA	NA	NA	NA	NA	NA	NA	NA	NA	-0.413656	1	NA	NA	NA	NA	NA	NA	NA	NA	NA	NA	1.39353	1	1.20095	6.27916e-09
BORCS5	NA	NA	NA	NA	-0.48188	1	0.339214	1	NA	NA	NA	NA	NA	NA	NA	NA	NA	NA	NA	NA	NA	NA	NA	NA	0.541916	1	NA	NA	0.604715	1
BORCS7	NA	NA	-0.425095	0.108332	NA	NA	NA	NA	NA	NA	NA	NA	NA	NA	NA	NA	NA	NA	NA	NA	NA	NA	NA	NA	NA	NA	1.70112	1	NA	NA
BPTF	NA	NA	NA	NA	NA	NA	NA	NA	NA	NA	NA	NA	NA	NA	NA	NA	NA	NA	NA	NA	NA	NA	NA	NA	-0.283752	0.0645552	NA	NA	0.561685	1
BRAF	NA	NA	NA	NA	NA	NA	-0.484561	1	NA	NA	NA	NA	NA	NA	NA	NA	NA	NA	NA	NA	NA	NA	NA	NA	-0.382944	0.0324333	2.38332	1	NA	NA
BRD1	NA	NA	NA	NA	NA	NA	NA	NA	NA	NA	NA	NA	NA	NA	NA	NA	NA	NA	NA	NA	NA	NA	NA	NA	0.498825	1	2.05604	1	0.625207	0.0370282
BRD3	NA	NA	NA	NA	NA	NA	NA	NA	NA	NA	NA	NA	NA	NA	NA	NA	NA	NA	NA	NA	NA	NA	NA	NA	-0.26535	1	NA	NA	NA	NA
BRD4	NA	NA	NA	NA	NA	NA	-0.287887	1	NA	NA	NA	NA	NA	NA	NA	NA	NA	NA	NA	NA	NA	NA	NA	NA	-0.260507	0.554983	NA	NA	0.457774	1
BRD7	0.342809	3.69444e-81	NA	NA	0.50067	0.418532	NA	NA	NA	NA	NA	NA	NA	NA	NA	NA	NA	NA	NA	NA	NA	NA	NA	NA	NA	NA	1.74088	1	0.91556	0.000185211
BRD9	NA	NA	NA	NA	0.269254	1	0.352796	1	NA	NA	NA	NA	NA	NA	NA	NA	NA	NA	NA	NA	0.285311	3.3921e-06	NA	NA	NA	NA	NA	NA	0.956738	0.00162315
BRI3	NA	NA	0.472334	0.00898473	0.601296	1	-0.419549	1	NA	NA	NA	NA	NA	NA	NA	NA	NA	NA	NA	NA	NA	NA	NA	NA	-0.281528	3.42153e-05	NA	NA	-0.401352	1
BRI3BP	NA	NA	NA	NA	-0.27902	1	NA	NA	NA	NA	NA	NA	NA	NA	NA	NA	NA	NA	NA	NA	NA	NA	NA	NA	NA	NA	NA	NA	NA	NA
BRK1	-0.276442	3.23098e-46	NA	NA	-0.302343	1	NA	NA	NA	NA	NA	NA	NA	NA	NA	NA	NA	NA	NA	NA	NA	NA	NA	NA	-0.587185	9.02229e-05	-1.39513	1	-0.437891	1
BSG	NA	NA	0.266871	1	0.28981	1	NA	NA	NA	NA	NA	NA	NA	NA	NA	NA	NA	NA	NA	NA	NA	NA	NA	NA	-0.306155	0.161343	NA	NA	-0.254423	1
BSPRY	NA	NA	NA	NA	NA	NA	NA	NA	NA	NA	NA	NA	NA	NA	NA	NA	NA	NA	NA	NA	NA	NA	NA	NA	-0.408543	0.0871617	NA	NA	NA	NA
BST2	NA	NA	NA	NA	0.687194	0.180994	NA	NA	NA	NA	NA	NA	NA	NA	-0.339535	1	NA	NA	NA	NA	0.289684	1	NA	NA	-0.801347	1.71766e-07	NA	NA	NA	NA
BTBD19	NA	NA	-0.327181	1	NA	NA	NA	NA	NA	NA	NA	NA	NA	NA	NA	NA	NA	NA	NA	NA	NA	NA	NA	NA	NA	NA	NA	NA	NA	NA
BTF3	-0.520441	7.52451e-76	-0.588514	1.02391e-08	-0.576838	0.0334762	-0.267905	1	NA	NA	NA	NA	NA	NA	NA	NA	NA	NA	NA	NA	-0.541723	1.56445e-08	-0.397958	2.01153e-05	-0.534091	4.47465e-06	-0.571912	1	-0.940083	2.16755e-06
BTG1	-1.09485	4.97028e-154	-1.31035	5.80323e-29	-0.399084	1	0.515095	1	NA	NA	NA	NA	NA	NA	-0.298184	1	NA	NA	NA	NA	-0.775541	6.39167e-08	-0.296337	1	1.63987	6.20794e-15	0.857745	1	0.325799	1
BTG2	NA	NA	-0.35537	1	-0.819711	1	NA	NA	NA	NA	NA	NA	NA	NA	-0.757099	0.0103706	NA	NA	0.338222	1	NA	NA	NA	NA	NA	NA	1.94285	1	0.291699	1
BTN3A2	NA	NA	-0.344151	1	NA	NA	NA	NA	NA	NA	-0.299175	2.00983e-41	NA	NA	-0.478425	1	NA	NA	NA	NA	NA	NA	-0.275295	1	NA	NA	-1.87015	1	-0.393132	0.00913147
BUB3	NA	NA	NA	NA	NA	NA	-0.366862	1	NA	NA	NA	NA	NA	NA	NA	NA	NA	NA	NA	NA	NA	NA	NA	NA	NA	NA	NA	NA	-0.254192	1
BUD23	NA	NA	NA	NA	-0.412387	1	NA	NA	NA	NA	NA	NA	NA	NA	0.301052	1	NA	NA	NA	NA	NA	NA	NA	NA	NA	NA	NA	NA	NA	NA
BX255925.3	NA	NA	NA	NA	NA	NA	NA	NA	NA	NA	NA	NA	NA	NA	NA	NA	NA	NA	NA	NA	NA	NA	NA	NA	NA	NA	-1.51272	1	NA	NA
BZW1	-0.466223	1.41929e-56	NA	NA	NA	NA	NA	NA	NA	NA	NA	NA	NA	NA	NA	NA	NA	NA	NA	NA	NA	NA	NA	NA	NA	NA	NA	NA	NA	NA
BZW2	NA	NA	NA	NA	NA	NA	NA	NA	NA	NA	NA	NA	NA	NA	NA	NA	NA	NA	NA	NA	NA	NA	NA	NA	-0.461033	0.24971	NA	NA	NA	NA
C11orf1	NA	NA	NA	NA	NA	NA	NA	NA	NA	NA	NA	NA	NA	NA	NA	NA	NA	NA	NA	NA	NA	NA	NA	NA	-0.303814	1	NA	NA	NA	NA
C11orf21	NA	NA	NA	NA	NA	NA	NA	NA	NA	NA	NA	NA	NA	NA	NA	NA	NA	NA	NA	NA	NA	NA	NA	NA	NA	NA	-1.24432	1	NA	NA
C11orf74	NA	NA	NA	NA	NA	NA	NA	NA	NA	NA	NA	NA	NA	NA	NA	NA	NA	NA	NA	NA	NA	NA	NA	NA	-0.386355	0.0440612	NA	NA	NA	NA
C11orf96	-0.79824	9.219e-13	-0.355606	1	-0.863713	1	NA	NA	NA	NA	NA	NA	NA	NA	NA	NA	NA	NA	NA	NA	NA	NA	NA	NA	-0.296754	0.587617	NA	NA	NA	NA
C12orf10	NA	NA	NA	NA	NA	NA	NA	NA	NA	NA	NA	NA	NA	NA	NA	NA	NA	NA	NA	NA	NA	NA	NA	NA	-0.301656	0.0272003	NA	NA	NA	NA
C12orf45	NA	NA	NA	NA	-0.280061	1	NA	NA	NA	NA	NA	NA	NA	NA	NA	NA	NA	NA	NA	NA	NA	NA	NA	NA	NA	NA	NA	NA	NA	NA
C12orf57	-0.322095	2.42068e-20	-0.575934	0.00584584	-0.31906	1	0.262926	1	NA	NA	NA	NA	NA	NA	NA	NA	NA	NA	NA	NA	NA	NA	NA	NA	0.260574	0.473383	NA	NA	-0.373176	0.0875249
C12orf75	NA	NA	NA	NA	-0.658368	1	-0.800168	1	NA	NA	-0.324164	7.71452e-30	NA	NA	NA	NA	NA	NA	NA	NA	-0.319846	1	NA	NA	NA	NA	-0.408879	1	NA	NA
C12orf76	NA	NA	NA	NA	NA	NA	NA	NA	NA	NA	NA	NA	NA	NA	NA	NA	NA	NA	NA	NA	NA	NA	NA	NA	NA	NA	-1.06098	1	NA	NA
C14orf119	NA	NA	NA	NA	NA	NA	NA	NA	NA	NA	NA	NA	NA	NA	NA	NA	NA	NA	NA	NA	NA	NA	NA	NA	NA	NA	-1.10479	1	NA	NA
C15orf48	-1.74909	4.68755e-75	-0.689496	1	-1.5645	0.0449327	NA	NA	NA	NA	NA	NA	NA	NA	NA	NA	NA	NA	NA	NA	NA	NA	NA	NA	NA	NA	NA	NA	NA	NA
C16orf54	0.568969	1.79319e-105	NA	NA	NA	NA	NA	NA	NA	NA	NA	NA	-0.256652	2.44128e-09	0.469811	1	NA	NA	NA	NA	NA	NA	-0.366739	1	0.279361	0.206688	NA	NA	-0.391179	1
C19orf24	-0.557907	8.19646e-67	-0.404769	9.14966e-10	-0.597639	0.0412068	-0.424899	0.0666087	NA	NA	NA	NA	NA	NA	0.412682	0.0734873	NA	NA	NA	NA	NA	NA	NA	NA	-0.250229	1	NA	NA	NA	NA
C19orf33	NA	NA	NA	NA	NA	NA	NA	NA	NA	NA	NA	NA	NA	NA	NA	NA	NA	NA	NA	NA	NA	NA	NA	NA	NA	NA	-1.13317	1	NA	NA
C19orf38	-0.250086	5.27087e-55	NA	NA	NA	NA	NA	NA	NA	NA	NA	NA	NA	NA	NA	NA	NA	NA	NA	NA	NA	NA	NA	NA	NA	NA	NA	NA	NA	NA
C19orf66	-0.354575	1.34702e-30	-0.289563	0.000195722	NA	NA	NA	NA	NA	NA	NA	NA	NA	NA	0.278458	1	NA	NA	NA	NA	NA	NA	NA	NA	NA	NA	NA	NA	NA	NA
C19orf70	-0.632552	2.48645e-74	-0.718835	1.90089e-16	-0.622164	0.0246498	-0.469156	0.0666087	NA	NA	NA	NA	NA	NA	0.755305	1.17361e-08	NA	NA	NA	NA	NA	NA	NA	NA	-0.373965	1	NA	NA	NA	NA
C1GALT1	NA	NA	NA	NA	NA	NA	-0.2536	1	NA	NA	NA	NA	NA	NA	NA	NA	NA	NA	NA	NA	NA	NA	NA	NA	NA	NA	NA	NA	NA	NA
C1orf123	-0.308174	4.38451e-35	-0.32498	7.81515e-06	NA	NA	NA	NA	NA	NA	NA	NA	NA	NA	NA	NA	NA	NA	NA	NA	NA	NA	NA	NA	-0.302571	0.839843	NA	NA	NA	NA
C1orf162	-0.300371	6.55999e-33	0.416412	1	-0.799111	0.263191	NA	NA	NA	NA	NA	NA	NA	NA	NA	NA	NA	NA	NA	NA	NA	NA	NA	NA	NA	NA	NA	NA	NA	NA
C1orf21	NA	NA	NA	NA	NA	NA	NA	NA	NA	NA	NA	NA	-0.257734	0.00141063	NA	NA	NA	NA	NA	NA	NA	NA	NA	NA	-0.251363	1	NA	NA	-0.506962	1
C1orf43	NA	NA	NA	NA	NA	NA	NA	NA	NA	NA	NA	NA	NA	NA	NA	NA	NA	NA	NA	NA	NA	NA	NA	NA	NA	NA	-1.23437	1	NA	NA
C1orf54	NA	NA	NA	NA	-0.260385	1	NA	NA	NA	NA	NA	NA	NA	NA	NA	NA	NA	NA	NA	NA	NA	NA	NA	NA	NA	NA	NA	NA	NA	NA
C1orf56	NA	NA	-0.405806	1	-0.562588	1	NA	NA	NA	NA	-0.306764	2.2829e-24	-0.283789	1.58362e-09	NA	NA	-0.533775	9.18619e-19	-0.253701	0.478787	-0.357272	1	-0.523502	0.107011	NA	NA	-1.34853	1	-0.781582	1
C1QTNF4	NA	NA	NA	NA	NA	NA	NA	NA	NA	NA	NA	NA	NA	NA	NA	NA	NA	NA	NA	NA	NA	NA	NA	NA	-0.817885	0.0075946	NA	NA	NA	NA
C20orf27	NA	NA	NA	NA	-0.301717	1	NA	NA	NA	NA	NA	NA	NA	NA	NA	NA	NA	NA	NA	NA	NA	NA	NA	NA	NA	NA	-1.34625	1	NA	NA
C21orf2	NA	NA	NA	NA	NA	NA	-0.29789	0.860548	NA	NA	NA	NA	NA	NA	0.252497	0.947805	NA	NA	NA	NA	NA	NA	NA	NA	NA	NA	NA	NA	NA	NA
C21orf91	NA	NA	NA	NA	NA	NA	NA	NA	NA	NA	NA	NA	NA	NA	-0.266483	1	NA	NA	NA	NA	NA	NA	NA	NA	NA	NA	NA	NA	NA	NA
C22orf39	NA	NA	NA	NA	NA	NA	NA	NA	NA	NA	NA	NA	NA	NA	NA	NA	NA	NA	NA	NA	NA	NA	NA	NA	NA	NA	-1.09521	1	NA	NA
C2orf88	NA	NA	NA	NA	NA	NA	NA	NA	NA	NA	NA	NA	NA	NA	NA	NA	NA	NA	NA	NA	NA	NA	NA	NA	NA	NA	-1.74947	1	NA	NA
C3orf58	NA	NA	NA	NA	-0.256936	1	NA	NA	NA	NA	NA	NA	NA	NA	NA	NA	NA	NA	NA	NA	NA	NA	NA	NA	NA	NA	NA	NA	NA	NA
C6orf48	-0.548197	2.63339e-66	-0.468781	1.55244e-09	-0.678873	0.0146088	-0.382783	0.0666087	NA	NA	NA	NA	NA	NA	0.540794	0.000152654	NA	NA	NA	NA	NA	NA	NA	NA	-0.914254	1.84683e-05	NA	NA	NA	NA
C6orf62	NA	NA	-0.320976	0.895208	NA	NA	-0.28635	1	NA	NA	NA	NA	NA	NA	-0.483924	1	NA	NA	NA	NA	NA	NA	NA	NA	-0.365726	0.0059369	-1.66524	1	-0.402621	1
C7orf50	NA	NA	NA	NA	NA	NA	NA	NA	NA	NA	NA	NA	NA	NA	NA	NA	NA	NA	NA	NA	NA	NA	NA	NA	NA	NA	-1.56583	1	NA	NA
C8orf59	-1.00819	8.48649e-122	-0.774425	3.88926e-17	-0.989363	4.21972e-05	-0.635718	0.00116226	NA	NA	NA	NA	NA	NA	0.720971	2.66106e-09	NA	NA	NA	NA	NA	NA	-0.300738	1	-0.828797	0.000143159	NA	NA	NA	NA
C9orf16	-0.37137	7.59624e-67	-0.395602	0.461831	-0.420737	1	0.276562	1	NA	NA	NA	NA	NA	NA	NA	NA	NA	NA	NA	NA	NA	NA	NA	NA	NA	NA	-1.59152	1	-0.433128	0.00542084
CA2	NA	NA	NA	NA	NA	NA	NA	NA	NA	NA	NA	NA	NA	NA	NA	NA	NA	NA	NA	NA	NA	NA	NA	NA	NA	NA	-2.69719	1	NA	NA
CACUL1	NA	NA	-0.388156	0.0726	NA	NA	NA	NA	NA	NA	NA	NA	NA	NA	NA	NA	NA	NA	NA	NA	NA	NA	NA	NA	NA	NA	NA	NA	NA	NA
CALCOCO1	NA	NA	NA	NA	NA	NA	NA	NA	NA	NA	NA	NA	NA	NA	NA	NA	NA	NA	NA	NA	NA	NA	NA	NA	NA	NA	-1.39071	1	NA	NA
CALCOCO2	NA	NA	NA	NA	NA	NA	NA	NA	NA	NA	NA	NA	NA	NA	-0.251491	1	NA	NA	NA	NA	NA	NA	NA	NA	-0.429494	1	NA	NA	NA	NA
CALD1	NA	NA	NA	NA	NA	NA	NA	NA	NA	NA	NA	NA	NA	NA	NA	NA	NA	NA	NA	NA	NA	NA	NA	NA	NA	NA	-1.26789	1	NA	NA
CALHM6	NA	NA	-0.579892	0.00766738	NA	NA	NA	NA	NA	NA	NA	NA	NA	NA	NA	NA	NA	NA	NA	NA	NA	NA	NA	NA	NA	NA	NA	NA	NA	NA
CALM1	0.515481	5.42518e-44	0.330521	1	0.297767	1	NA	NA	NA	NA	NA	NA	NA	NA	NA	NA	-0.263814	7.88391e-21	NA	NA	NA	NA	NA	NA	1.17448	3.04344e-08	-0.723306	1	-0.444926	0.252116
CALM2	0.692027	2.15219e-74	0.315884	1	NA	NA	NA	NA	NA	NA	NA	NA	NA	NA	-0.330568	1	-0.323418	3.60093e-19	NA	NA	NA	NA	NA	NA	NA	NA	0.253777	1	0.431066	0.0986106
CALM3	0.313414	3.40006e-53	0.638792	3.03453e-06	0.577932	1	0.274234	1	NA	NA	NA	NA	NA	NA	NA	NA	NA	NA	NA	NA	NA	NA	NA	NA	NA	NA	-1.65542	1	NA	NA
CALU	NA	NA	0.379268	3.87943e-08	0.601883	0.00125957	NA	NA	NA	NA	NA	NA	NA	NA	NA	NA	NA	NA	NA	NA	0.342966	1	NA	NA	NA	NA	-1.12198	1	NA	NA
CAMK1D	NA	NA	-0.264144	1	-0.287273	1	NA	NA	NA	NA	NA	NA	NA	NA	NA	NA	NA	NA	NA	NA	NA	NA	NA	NA	-0.699826	8.65812e-05	NA	NA	NA	NA
CAMK4	NA	NA	NA	NA	NA	NA	0.52338	1	NA	NA	NA	NA	NA	NA	NA	NA	NA	NA	NA	NA	NA	NA	NA	NA	0.986403	0.000571117	NA	NA	0.566231	0.00663133
CAMLG	NA	NA	NA	NA	-0.345717	1	NA	NA	NA	NA	NA	NA	NA	NA	NA	NA	NA	NA	NA	NA	NA	NA	NA	NA	NA	NA	0.339906	1	NA	NA
CAMTA1	NA	NA	NA	NA	NA	NA	NA	NA	NA	NA	NA	NA	NA	NA	NA	NA	NA	NA	NA	NA	NA	NA	NA	NA	NA	NA	-2.49861	1	NA	NA
CANX	0.422522	2.74835e-33	0.737901	6.85375e-07	1.27339	1.8943e-10	NA	NA	NA	NA	NA	NA	NA	NA	-0.320042	1	NA	NA	NA	NA	NA	NA	NA	NA	-0.463397	0.243124	NA	NA	0.312675	1
CAP1	0.74045	3.29185e-69	0.590713	9.29659e-06	0.822998	0.000204008	NA	NA	NA	NA	NA	NA	NA	NA	NA	NA	NA	NA	NA	NA	NA	NA	NA	NA	NA	NA	-1.87196	1	-0.259951	1
CAPG	NA	NA	0.649225	3.30617e-08	NA	NA	NA	NA	NA	NA	NA	NA	NA	NA	NA	NA	NA	NA	NA	NA	NA	NA	NA	NA	-0.344244	1	NA	NA	NA	NA
CAPN1	NA	NA	NA	NA	0.271769	1	NA	NA	NA	NA	NA	NA	NA	NA	NA	NA	NA	NA	NA	NA	NA	NA	NA	NA	-0.362753	0.0644808	-3.07498	1	NA	NA
CAPN15	NA	NA	NA	NA	NA	NA	-0.2814	1	NA	NA	NA	NA	NA	NA	NA	NA	NA	NA	NA	NA	NA	NA	NA	NA	NA	NA	NA	NA	NA	NA
CAPNS1	NA	NA	NA	NA	0.32034	1	NA	NA	NA	NA	NA	NA	NA	NA	0.372991	1	NA	NA	NA	NA	NA	NA	NA	NA	-0.440419	0.000151425	-1.31187	1	NA	NA
CAPZA1	0.557515	2.19298e-49	0.420927	0.0276464	0.589663	0.0328997	NA	NA	NA	NA	NA	NA	NA	NA	NA	NA	NA	NA	NA	NA	NA	NA	NA	NA	NA	NA	-0.681536	1	NA	NA
CAPZA2	0.459316	4.8761e-45	0.356145	1	0.732898	0.0166466	NA	NA	NA	NA	NA	NA	NA	NA	NA	NA	NA	NA	NA	NA	NA	NA	NA	NA	NA	NA	-0.459716	1	NA	NA
CAPZB	NA	NA	NA	NA	0.265368	1	NA	NA	NA	NA	NA	NA	NA	NA	NA	NA	NA	NA	NA	NA	NA	NA	NA	NA	NA	NA	-3.31297	1	NA	NA
CARD19	NA	NA	0.305355	1	0.387417	0.745376	NA	NA	NA	NA	NA	NA	NA	NA	NA	NA	NA	NA	NA	NA	NA	NA	NA	NA	-0.488143	0.0102904	-2.33329	1	NA	NA
CARD8-AS1	NA	NA	-0.285568	2.64527e-05	NA	NA	NA	NA	NA	NA	NA	NA	NA	NA	NA	NA	NA	NA	NA	NA	NA	NA	NA	NA	NA	NA	NA	NA	NA	NA
CARS1	0.335651	2.91786e-90	0.299466	1.39408e-12	NA	NA	NA	NA	NA	NA	NA	NA	NA	NA	-0.271729	0.16359	NA	NA	NA	NA	NA	NA	NA	NA	NA	NA	1.21965	1	NA	NA
CASC15	NA	NA	NA	NA	NA	NA	NA	NA	NA	NA	NA	NA	NA	NA	NA	NA	NA	NA	NA	NA	NA	NA	NA	NA	-0.288139	1	NA	NA	NA	NA
CASP9	NA	NA	-0.290078	1	NA	NA	NA	NA	NA	NA	NA	NA	NA	NA	NA	NA	NA	NA	NA	NA	NA	NA	NA	NA	NA	NA	NA	NA	NA	NA
CAST	0.409828	1.10212e-32	0.471418	9.99142e-05	0.670391	1	NA	NA	NA	NA	NA	NA	NA	NA	NA	NA	NA	NA	NA	NA	-0.283885	1	NA	NA	-0.391444	0.00129483	0.429304	1	NA	NA
CAT	NA	NA	-0.52279	0.00138625	NA	NA	NA	NA	NA	NA	NA	NA	NA	NA	NA	NA	NA	NA	NA	NA	NA	NA	NA	NA	-1.24007	5.50093e-11	0.622453	1	NA	NA
CATSPER1	NA	NA	NA	NA	NA	NA	NA	NA	NA	NA	NA	NA	NA	NA	NA	NA	NA	NA	NA	NA	NA	NA	NA	NA	NA	NA	-1.18924	1	NA	NA
CAVIN1	NA	NA	NA	NA	NA	NA	NA	NA	NA	NA	NA	NA	NA	NA	NA	NA	NA	NA	NA	NA	NA	NA	NA	NA	-0.364213	0.634652	NA	NA	NA	NA
CAVIN2	NA	NA	NA	NA	NA	NA	NA	NA	NA	NA	NA	NA	NA	NA	NA	NA	NA	NA	NA	NA	NA	NA	NA	NA	NA	NA	-2.67505	1	NA	NA
CBFA2T3	NA	NA	NA	NA	-0.254186	1	NA	NA	NA	NA	NA	NA	NA	NA	NA	NA	NA	NA	NA	NA	NA	NA	NA	NA	-0.510488	0.00247343	NA	NA	NA	NA
CBX3	0.459424	1.43281e-76	NA	NA	0.661549	0.339565	NA	NA	NA	NA	NA	NA	NA	NA	NA	NA	NA	NA	0.256229	0.000301821	NA	NA	NA	NA	NA	NA	-0.496075	1	0.411547	1
CBX4	NA	NA	NA	NA	NA	NA	NA	NA	NA	NA	NA	NA	-0.361023	3.91571e-14	NA	NA	NA	NA	NA	NA	NA	NA	NA	NA	NA	NA	NA	NA	NA	NA
CBX6	NA	NA	NA	NA	NA	NA	-0.365653	1	NA	NA	NA	NA	NA	NA	NA	NA	NA	NA	NA	NA	NA	NA	NA	NA	NA	NA	NA	NA	NA	NA
CCAR1	NA	NA	NA	NA	NA	NA	NA	NA	NA	NA	NA	NA	NA	NA	NA	NA	NA	NA	NA	NA	NA	NA	NA	NA	-0.286372	0.00302293	NA	NA	0.727575	0.0344246
CCDC115	NA	NA	NA	NA	NA	NA	NA	NA	NA	NA	NA	NA	NA	NA	NA	NA	NA	NA	NA	NA	NA	NA	NA	NA	NA	NA	-0.359782	1	NA	NA
CCDC12	NA	NA	NA	NA	-0.541325	1	NA	NA	NA	NA	NA	NA	NA	NA	NA	NA	NA	NA	NA	NA	NA	NA	NA	NA	NA	NA	NA	NA	0.285569	1
CCDC14	NA	NA	NA	NA	NA	NA	NA	NA	NA	NA	NA	NA	NA	NA	-0.266316	1	NA	NA	NA	NA	NA	NA	NA	NA	-0.328336	1	NA	NA	NA	NA
CCDC171	NA	NA	NA	NA	NA	NA	NA	NA	NA	NA	NA	NA	NA	NA	NA	NA	NA	NA	NA	NA	NA	NA	NA	NA	-0.369559	0.139525	1.572	1	NA	NA
CCDC47	0.262705	2.86081e-70	0.284572	0.000733728	NA	NA	NA	NA	NA	NA	NA	NA	NA	NA	NA	NA	NA	NA	NA	NA	NA	NA	NA	NA	NA	NA	-1.12398	1	NA	NA
CCDC50	NA	NA	NA	NA	0.297881	1	-0.415469	1	NA	NA	NA	NA	NA	NA	NA	NA	NA	NA	NA	NA	NA	NA	NA	NA	NA	NA	0.950032	1	NA	NA
CCDC57	NA	NA	NA	NA	NA	NA	-0.263603	1	NA	NA	0.277274	3.72582e-34	NA	NA	0.468768	0.138588	NA	NA	NA	NA	NA	NA	NA	NA	0.63643	0.00227082	1.32789	1	0.311866	1
CCDC66	NA	NA	NA	NA	NA	NA	0.271351	1	NA	NA	NA	NA	NA	NA	-0.373487	1	NA	NA	NA	NA	NA	NA	NA	NA	0.296676	1	2.09389	1	0.599415	1
CCDC69	0.311631	1.47233e-52	NA	NA	0.802504	0.00828214	-0.354466	1	NA	NA	NA	NA	NA	NA	NA	NA	NA	NA	NA	NA	0.302866	1	NA	NA	NA	NA	NA	NA	NA	NA
CCDC71L	NA	NA	0.282787	1	0.607867	4.04974e-06	NA	NA	NA	NA	NA	NA	NA	NA	NA	NA	NA	NA	NA	NA	NA	NA	NA	NA	NA	NA	-0.954551	1	NA	NA
CCDC84	NA	NA	NA	NA	NA	NA	NA	NA	NA	NA	NA	NA	NA	NA	-0.299682	1	NA	NA	NA	NA	NA	NA	NA	NA	NA	NA	NA	NA	0.323339	1
CCDC85B	NA	NA	-0.504512	0.0129716	NA	NA	NA	NA	NA	NA	NA	NA	NA	NA	NA	NA	NA	NA	NA	NA	NA	NA	NA	NA	NA	NA	-1.3759	1	NA	NA
CCDC88A	0.480556	8.65561e-36	0.650585	2.87691e-05	NA	NA	-0.294746	1	NA	NA	NA	NA	NA	NA	NA	NA	NA	NA	NA	NA	0.811828	0.704238	0.29817	1	-0.597446	5.26256e-05	1.05588	1	NA	NA
CCDC88B	NA	NA	NA	NA	NA	NA	-0.293833	1	NA	NA	NA	NA	NA	NA	NA	NA	NA	NA	NA	NA	NA	NA	NA	NA	NA	NA	NA	NA	0.44115	1
CCDC88C	NA	NA	NA	NA	NA	NA	0.413145	1	NA	NA	NA	NA	NA	NA	-0.325976	1	NA	NA	NA	NA	0.387104	1	NA	NA	NA	NA	-1.57525	1	0.592257	1
CCDC91	NA	NA	NA	NA	NA	NA	NA	NA	NA	NA	NA	NA	NA	NA	-0.359573	1	NA	NA	NA	NA	NA	NA	NA	NA	NA	NA	1.11452	1	NA	NA
CCDC92	NA	NA	NA	NA	NA	NA	NA	NA	NA	NA	NA	NA	NA	NA	NA	NA	NA	NA	NA	NA	NA	NA	NA	NA	NA	NA	-2.08011	1	NA	NA
CCDC93	NA	NA	NA	NA	-0.259065	1	NA	NA	NA	NA	NA	NA	NA	NA	NA	NA	NA	NA	NA	NA	NA	NA	NA	NA	NA	NA	NA	NA	0.477848	1
CCL2	-0.439514	0.00814994	NA	NA	0.349107	1	NA	NA	NA	NA	NA	NA	NA	NA	NA	NA	NA	NA	NA	NA	NA	NA	NA	NA	NA	NA	NA	NA	NA	NA
CCL20	-3.00391	1.1853e-107	-2.05521	0.0790089	NA	NA	NA	NA	NA	NA	NA	NA	NA	NA	NA	NA	NA	NA	NA	NA	NA	NA	NA	NA	NA	NA	NA	NA	NA	NA
CCL3	-1.72762	4.83005e-86	-1.23051	0.958715	1.329	1	-0.599826	1	NA	NA	NA	NA	0.573209	1	NA	NA	0.297597	1.98909e-06	NA	NA	NA	NA	0.772328	1	-0.472813	0.142342	NA	NA	-1.52632	1
CCL3L1	-4.64107	3.08533e-248	-4.50504	1.33045e-17	-0.418015	1	NA	NA	NA	NA	NA	NA	NA	NA	NA	NA	NA	NA	NA	NA	NA	NA	NA	NA	NA	NA	NA	NA	NA	NA
CCL3L3	-0.350544	2.69856e-146	NA	NA	0.383594	1	NA	NA	NA	NA	NA	NA	NA	NA	NA	NA	NA	NA	NA	NA	NA	NA	NA	NA	NA	NA	NA	NA	NA	NA
CCL4	-1.60447	3.59797e-75	-1.15231	0.137648	NA	NA	-0.251974	1	NA	NA	NA	NA	0.784399	1.07107e-07	-0.292454	1	0.346195	0.000374727	NA	NA	-0.263903	1	NA	NA	-0.305732	1	NA	NA	-0.933754	1.61689e-05
CCL4L2	-2.43419	1.17557e-111	-2.12283	1.11367e-08	-0.411038	1	0.483299	1	NA	NA	NA	NA	0.275694	1	NA	NA	0.50381	9.95821e-07	NA	NA	NA	NA	-0.289432	1	NA	NA	NA	NA	-0.882182	0.000183225
CCL5	-0.609563	2.03249e-09	-0.88171	1	-0.430055	1	NA	NA	NA	NA	-0.631711	1.81055e-54	NA	NA	NA	NA	NA	NA	-0.593748	0.92367	-0.776211	1	NA	NA	NA	NA	-2.67474	1	-1.75487	2.15459e-11
CCL7	-0.385636	0.0887213	NA	NA	NA	NA	NA	NA	NA	NA	NA	NA	NA	NA	NA	NA	NA	NA	NA	NA	NA	NA	NA	NA	NA	NA	NA	NA	NA	NA
CCNB1IP1	NA	NA	NA	NA	NA	NA	NA	NA	NA	NA	NA	NA	NA	NA	NA	NA	NA	NA	NA	NA	NA	NA	NA	NA	-0.403416	0.00628187	1.05588	1	NA	NA
CCND2	NA	NA	NA	NA	-0.804335	1	0.344124	1	NA	NA	NA	NA	NA	NA	-0.348306	1	-0.296852	1.49184e-09	NA	NA	0.76987	0.00486148	NA	NA	-0.452416	1	NA	NA	NA	NA
CCND3	0.905725	2.45668e-132	0.49973	8.74146e-05	0.523684	1	NA	NA	NA	NA	NA	NA	NA	NA	NA	NA	NA	NA	NA	NA	NA	NA	NA	NA	0.327096	0.911834	-1.11818	1	0.435814	0.113296
CCNDBP1	NA	NA	NA	NA	0.262092	1	NA	NA	NA	NA	NA	NA	NA	NA	NA	NA	NA	NA	NA	NA	NA	NA	NA	NA	NA	NA	-0.572309	1	-0.255703	1
CCNG1	NA	NA	NA	NA	NA	NA	NA	NA	NA	NA	NA	NA	NA	NA	NA	NA	NA	NA	NA	NA	NA	NA	NA	NA	NA	NA	-2.0159	1	NA	NA
CCNH	NA	NA	-0.483146	0.00381573	-0.874078	0.00257476	-0.251241	1	NA	NA	-0.300902	3.25142e-33	NA	NA	-0.442459	1	-0.297737	4.25836e-13	NA	NA	NA	NA	NA	NA	-0.336798	0.0124813	0.668469	1	NA	NA
CCNI	-0.568134	8.366e-70	-0.774119	1.66487e-13	-0.400832	1	NA	NA	NA	NA	NA	NA	NA	NA	NA	NA	NA	NA	NA	NA	-0.284802	1	NA	NA	-0.361273	0.827541	-2.208	1	-0.626435	0.000611261
CCNL1	0.290891	1.74668e-27	NA	NA	-0.382653	1	NA	NA	0.336931	2.78327e-110	NA	NA	NA	NA	-0.545626	1	NA	NA	0.384242	4.03991e-10	0.297731	1	NA	NA	0.288633	1	1.83638	1	0.315491	1
CCNT1	NA	NA	NA	NA	-0.352478	1	NA	NA	NA	NA	NA	NA	NA	NA	-0.391783	1	NA	NA	NA	NA	NA	NA	NA	NA	NA	NA	NA	NA	0.292607	1
CCNY	NA	NA	NA	NA	NA	NA	NA	NA	NA	NA	NA	NA	NA	NA	NA	NA	NA	NA	NA	NA	NA	NA	NA	NA	-0.280855	1	NA	NA	-0.337819	1
CCPG1	0.290845	4.31895e-70	NA	NA	NA	NA	-0.314207	1	NA	NA	-0.27867	8.41005e-32	NA	NA	NA	NA	NA	NA	NA	NA	NA	NA	NA	NA	NA	NA	-2.03602	1	NA	NA
CCR7	NA	NA	NA	NA	-0.89046	1	NA	NA	-0.445557	8.83644e-160	NA	NA	NA	NA	-0.32565	1	NA	NA	-0.302072	0.279678	NA	NA	-0.479973	0.193553	0.474976	1	NA	NA	NA	NA
CCRL2	-0.645933	4.30404e-48	-0.53918	0.122399	NA	NA	NA	NA	NA	NA	NA	NA	NA	NA	NA	NA	NA	NA	NA	NA	NA	NA	NA	NA	NA	NA	NA	NA	NA	NA
CCS	NA	NA	NA	NA	NA	NA	NA	NA	NA	NA	NA	NA	NA	NA	NA	NA	NA	NA	NA	NA	NA	NA	NA	NA	NA	NA	-0.800386	1	NA	NA
CCSER2	NA	NA	NA	NA	NA	NA	0.715608	1	NA	NA	NA	NA	NA	NA	-0.266193	1	NA	NA	NA	NA	NA	NA	NA	NA	0.454878	1	NA	NA	0.560627	1
CCT2	NA	NA	NA	NA	NA	NA	0.273612	1	NA	NA	NA	NA	NA	NA	NA	NA	NA	NA	NA	NA	NA	NA	NA	NA	-0.528298	0.189859	1.43548	1	NA	NA
CCT3	NA	NA	NA	NA	NA	NA	NA	NA	NA	NA	NA	NA	NA	NA	NA	NA	NA	NA	NA	NA	NA	NA	NA	NA	-0.29789	0.123723	NA	NA	NA	NA
CCT6A	NA	NA	NA	NA	0.282379	1	NA	NA	NA	NA	NA	NA	NA	NA	NA	NA	NA	NA	NA	NA	NA	NA	NA	NA	-0.426996	0.0510215	1.05588	1	NA	NA
CCT8	0.3024	3.96134e-59	NA	NA	0.555548	0.167402	NA	NA	NA	NA	NA	NA	NA	NA	0.290393	1	NA	NA	NA	NA	NA	NA	NA	NA	-0.286017	0.00160569	0.457965	1	0.367203	1
CD109	NA	NA	NA	NA	NA	NA	NA	NA	NA	NA	NA	NA	NA	NA	NA	NA	NA	NA	NA	NA	NA	NA	NA	NA	-0.638587	6.66376e-05	NA	NA	NA	NA
CD151	NA	NA	0.284208	0.243374	0.445557	0.12557	NA	NA	NA	NA	NA	NA	NA	NA	NA	NA	NA	NA	NA	NA	NA	NA	NA	NA	NA	NA	-1.53334	1	NA	NA
CD164	0.258834	1.8699e-41	NA	NA	NA	NA	NA	NA	NA	NA	NA	NA	NA	NA	-0.329359	1	NA	NA	NA	NA	NA	NA	NA	NA	-0.288964	0.125653	-0.855811	1	NA	NA
CD1C	NA	NA	NA	NA	-1.14517	1	NA	NA	NA	NA	NA	NA	NA	NA	NA	NA	NA	NA	NA	NA	NA	NA	NA	NA	NA	NA	NA	NA	NA	NA
CD2	NA	NA	NA	NA	0.33508	1	0.744212	1	NA	NA	NA	NA	0.490273	3.16348e-17	-0.373886	1	NA	NA	NA	NA	NA	NA	NA	NA	1.09733	0.0785161	1.50043	1	0.647406	2.20362e-05
CD226	NA	NA	NA	NA	NA	NA	NA	NA	NA	NA	NA	NA	NA	NA	NA	NA	0.281125	1.36538e-16	NA	NA	NA	NA	0.298369	1	NA	NA	-3.0249	1	NA	NA
CD247	NA	NA	NA	NA	-0.292584	1	0.302039	1	NA	NA	NA	NA	NA	NA	NA	NA	-0.352304	6.43842e-22	NA	NA	NA	NA	-0.451917	1	0.595363	1	1.03289	1	-0.422763	1
CD27	NA	NA	NA	NA	NA	NA	NA	NA	NA	NA	NA	NA	NA	NA	NA	NA	NA	NA	NA	NA	0.446914	1	-0.33614	1	0.298317	1	NA	NA	NA	NA
CD2AP	NA	NA	NA	NA	NA	NA	-0.573502	1	NA	NA	NA	NA	NA	NA	NA	NA	NA	NA	NA	NA	NA	NA	NA	NA	NA	NA	1.11452	1	NA	NA
CD2BP2	NA	NA	NA	NA	NA	NA	-0.263762	1	NA	NA	NA	NA	NA	NA	NA	NA	NA	NA	NA	NA	NA	NA	NA	NA	NA	NA	NA	NA	NA	NA
CD300E	-0.334229	4.8866e-13	NA	NA	0.951534	0.0368632	NA	NA	NA	NA	NA	NA	NA	NA	NA	NA	NA	NA	NA	NA	NA	NA	NA	NA	NA	NA	NA	NA	NA	NA
CD302	-0.280689	1.30107e-48	NA	NA	NA	NA	NA	NA	NA	NA	NA	NA	NA	NA	NA	NA	NA	NA	NA	NA	NA	NA	NA	NA	NA	NA	NA	NA	NA	NA
CD34	NA	NA	NA	NA	NA	NA	NA	NA	NA	NA	NA	NA	NA	NA	NA	NA	NA	NA	NA	NA	NA	NA	NA	NA	-0.777545	3.72337e-05	NA	NA	NA	NA
CD36	1.44406	1.69859e-149	1.79414	9.01161e-28	2.0431	2.3182e-12	NA	NA	NA	NA	NA	NA	NA	NA	NA	NA	NA	NA	NA	NA	NA	NA	NA	NA	NA	NA	-1.84201	1	NA	NA
CD37	-0.780235	6.11527e-113	-0.837015	3.445e-14	-0.905221	2.46621e-05	NA	NA	NA	NA	NA	NA	NA	NA	NA	NA	NA	NA	NA	NA	-0.326031	1	NA	NA	-0.50231	0.00546348	-0.824253	1	-0.422916	0.139023
CD38	NA	NA	NA	NA	NA	NA	NA	NA	NA	NA	NA	NA	NA	NA	NA	NA	NA	NA	NA	NA	NA	NA	NA	NA	-0.258845	1	NA	NA	-0.339655	1
CD3D	NA	NA	NA	NA	-0.431851	1	0.44089	1	NA	NA	NA	NA	NA	NA	NA	NA	0.318776	0.00116894	NA	NA	NA	NA	NA	NA	1.28843	1.07854e-07	2.54977	1	-0.521426	0.0107693
CD3E	NA	NA	NA	NA	-0.260086	1	NA	NA	NA	NA	NA	NA	NA	NA	NA	NA	0.361963	9.2533e-10	NA	NA	NA	NA	NA	NA	1.05541	2.08835e-05	NA	NA	NA	NA
CD3G	NA	NA	NA	NA	NA	NA	-0.385841	1	-0.266044	1.29439e-88	-0.266406	6.30651e-27	NA	NA	-0.387215	1	0.266759	0.356268	NA	NA	NA	NA	NA	NA	1.16162	1.12214e-07	NA	NA	-0.733463	0.00535075
CD4	-0.456484	3.278e-40	NA	NA	NA	NA	NA	NA	NA	NA	NA	NA	0.310115	6.67014e-10	NA	NA	NA	NA	NA	NA	NA	NA	1.02478	3.97452e-05	NA	NA	NA	NA	0.254931	1
CD40	NA	NA	0.462325	6.55107e-10	NA	NA	NA	NA	NA	NA	NA	NA	NA	NA	NA	NA	NA	NA	NA	NA	NA	NA	NA	NA	NA	NA	-0.775202	1	NA	NA
CD46	NA	NA	0.254527	1	0.398443	1	NA	NA	NA	NA	NA	NA	NA	NA	-0.362868	1	NA	NA	NA	NA	NA	NA	NA	NA	NA	NA	-0.844015	1	0.499627	0.350685
CD47	0.322036	6.88623e-73	0.652264	8.27829e-05	NA	NA	-0.311787	1	-0.309812	1.72757e-130	-0.380564	4.1243e-69	-0.316803	5.59127e-14	-0.457514	1	NA	NA	NA	NA	NA	NA	-0.273021	1	NA	NA	NA	NA	NA	NA
CD48	-0.359166	1.3601e-46	-0.741887	2.54903e-14	-0.47945	1	NA	NA	NA	NA	NA	NA	NA	NA	NA	NA	NA	NA	-0.263595	1.55483e-05	-0.85093	2.78523e-13	-0.383206	1	1.30923	1.0036e-09	-0.344912	1	-0.788977	1.07674e-05
CD52	0.836503	2.67805e-81	0.447713	1	-0.518566	1	NA	NA	-0.272971	8.89017e-111	-0.380528	2.25833e-49	NA	NA	-0.325841	1	NA	NA	-0.263039	1.81499e-12	-1.12163	1.45202e-09	NA	NA	NA	NA	0.935438	1	-0.755159	7.40586e-06
CD53	0.480934	3.68897e-35	0.637665	7.72163e-13	1.04575	1.25517e-07	0.321205	1	NA	NA	NA	NA	NA	NA	NA	NA	NA	NA	NA	NA	-0.258774	1	NA	NA	NA	NA	NA	NA	-0.256818	1
CD55	NA	NA	0.395596	0.835733	0.266252	1	NA	NA	NA	NA	NA	NA	NA	NA	-0.270988	1	NA	NA	NA	NA	-0.261539	1	NA	NA	0.706105	1	0.263003	1	0.639949	0.132886
CD59	NA	NA	NA	NA	NA	NA	NA	NA	NA	NA	NA	NA	NA	NA	NA	NA	NA	NA	NA	NA	NA	NA	0.292699	1	-0.398467	0.0201096	NA	NA	NA	NA
CD63	0.711935	2.36716e-64	1.58477	8.13477e-32	1.24675	9.70903e-09	NA	NA	NA	NA	NA	NA	NA	NA	NA	NA	NA	NA	NA	NA	NA	NA	NA	NA	-1.09803	2.95326e-13	-2.22624	1	-0.311622	1
CD68	-0.48577	1.90049e-64	NA	NA	0.364167	1	NA	NA	NA	NA	NA	NA	NA	NA	NA	NA	NA	NA	NA	NA	NA	NA	NA	NA	NA	NA	-2.40082	1	NA	NA
CD69	NA	NA	-0.648635	0.220579	-1.12345	1	1.11894	1	0.454602	3.07876e-59	0.456203	1.02976e-27	0.440905	0.119585	-0.506345	1	NA	NA	0.59638	1.74369e-12	NA	NA	0.472505	1	NA	NA	1.8593	1	NA	NA
CD7	NA	NA	NA	NA	-0.341662	1	NA	NA	NA	NA	NA	NA	NA	NA	0.274562	1	NA	NA	NA	NA	NA	NA	-0.274388	1	1.50017	4.40193e-11	1.19442	1	-0.511758	0.0236757
CD74	-1.03045	1.12696e-100	-0.531238	1	-1.40061	3.65872e-12	NA	NA	NA	NA	-0.352649	7.34593e-22	NA	NA	NA	NA	0.302122	1.02543e-06	NA	NA	-0.501945	0.0161475	NA	NA	-1.30119	1.86539e-09	-0.863627	1	-1.16951	5.02431e-05
CD79A	NA	NA	NA	NA	NA	NA	NA	NA	NA	NA	NA	NA	NA	NA	0.561886	1	NA	NA	-0.30842	3.74899e-11	-1.13714	2.15218e-07	NA	NA	NA	NA	NA	NA	NA	NA
CD81	NA	NA	0.274036	1	NA	NA	NA	NA	NA	NA	-0.353831	2.37547e-43	NA	NA	NA	NA	-0.28324	5.17163e-17	NA	NA	NA	NA	NA	NA	-0.604296	0.00126803	NA	NA	-0.806195	0.00248334
CD82	0.620844	8.34356e-108	0.655836	1.13737e-15	NA	NA	-0.289792	1	NA	NA	NA	NA	0.253096	4.21172e-14	NA	NA	NA	NA	NA	NA	NA	NA	NA	NA	-0.698095	2.98472e-05	-0.736853	1	NA	NA
CD83	-1.29229	1.23844e-152	-1.33579	8.73488e-25	-1.3603	0.00651593	NA	NA	NA	NA	NA	NA	NA	NA	-0.685053	0.479905	NA	NA	NA	NA	-0.282613	1	NA	NA	NA	NA	NA	NA	-0.659899	1
CD84	NA	NA	0.599316	4.79994e-07	NA	NA	NA	NA	NA	NA	NA	NA	NA	NA	-0.318285	1	NA	NA	NA	NA	NA	NA	NA	NA	NA	NA	-2.26136	1	NA	NA
CD86	-0.851735	1.75632e-77	-0.699946	2.81679e-06	-1.04487	0.35114	NA	NA	NA	NA	NA	NA	NA	NA	NA	NA	NA	NA	NA	NA	NA	NA	NA	NA	NA	NA	NA	NA	NA	NA
CD8B	NA	NA	NA	NA	NA	NA	NA	NA	NA	NA	-0.270008	6.53879e-28	NA	NA	NA	NA	NA	NA	NA	NA	NA	NA	-0.34098	1	NA	NA	NA	NA	NA	NA
CD9	NA	NA	NA	NA	NA	NA	NA	NA	NA	NA	NA	NA	NA	NA	NA	NA	NA	NA	0.253373	0.581503	NA	NA	NA	NA	-0.422863	0.947898	-4.85848	1	NA	NA
CD99	NA	NA	0.61705	0.0404626	0.435587	1	-0.790093	1	NA	NA	-0.273819	1.6354e-21	NA	NA	NA	NA	NA	NA	NA	NA	-0.550555	1.70991e-05	NA	NA	-0.735783	0.00159355	-2.60794	1	-0.428823	0.01124
CDC34	NA	NA	NA	NA	NA	NA	NA	NA	NA	NA	NA	NA	NA	NA	NA	NA	NA	NA	NA	NA	NA	NA	NA	NA	NA	NA	-1.10527	1	NA	NA
CDC37	NA	NA	NA	NA	NA	NA	NA	NA	NA	NA	NA	NA	NA	NA	NA	NA	NA	NA	NA	NA	NA	NA	NA	NA	-0.427306	0.0477036	-0.614462	1	NA	NA
CDC42	0.334101	3.37599e-29	0.274587	0.88166	0.278088	1	NA	NA	NA	NA	NA	NA	NA	NA	NA	NA	NA	NA	NA	NA	NA	NA	NA	NA	NA	NA	-1.39939	1	NA	NA
CDC42SE1	NA	NA	NA	NA	NA	NA	0.57552	1	NA	NA	NA	NA	NA	NA	NA	NA	NA	NA	NA	NA	NA	NA	NA	NA	NA	NA	-0.582252	1	NA	NA
CDH23	NA	NA	-0.348893	1	NA	NA	NA	NA	NA	NA	NA	NA	NA	NA	NA	NA	NA	NA	NA	NA	NA	NA	NA	NA	NA	NA	NA	NA	NA	NA
CDIP1	NA	NA	NA	NA	NA	NA	NA	NA	NA	NA	NA	NA	NA	NA	NA	NA	NA	NA	NA	NA	NA	NA	NA	NA	NA	NA	-1.15538	1	NA	NA
CDIPT	NA	NA	NA	NA	0.256922	1	NA	NA	NA	NA	NA	NA	NA	NA	NA	NA	NA	NA	NA	NA	NA	NA	NA	NA	-0.250185	1	-0.935601	1	NA	NA
CDK12	NA	NA	NA	NA	0.324639	1	0.264895	1	NA	NA	NA	NA	NA	NA	-0.367502	1	NA	NA	NA	NA	NA	NA	NA	NA	NA	NA	0.611139	1	1.00219	6.03233e-06
CDK13	0.281334	9.42906e-63	NA	NA	-0.414059	1	-0.502441	1	NA	NA	-0.250372	4.6368e-34	NA	NA	-0.429202	1	NA	NA	NA	NA	NA	NA	NA	NA	-0.250906	0.88054	0.622453	1	NA	NA
CDK2AP1	0.297654	3.27781e-88	0.26024	3.75695e-09	NA	NA	NA	NA	NA	NA	NA	NA	NA	NA	NA	NA	NA	NA	NA	NA	NA	NA	NA	NA	NA	NA	-2.10701	1	NA	NA
CDK4	NA	NA	NA	NA	NA	NA	NA	NA	NA	NA	NA	NA	NA	NA	NA	NA	NA	NA	NA	NA	NA	NA	NA	NA	-0.375462	0.284534	NA	NA	NA	NA
CDK5RAP2	NA	NA	NA	NA	NA	NA	NA	NA	NA	NA	NA	NA	NA	NA	NA	NA	NA	NA	NA	NA	NA	NA	NA	NA	NA	NA	-1.00977	1	NA	NA
CDK6	NA	NA	NA	NA	NA	NA	NA	NA	NA	NA	NA	NA	NA	NA	-0.265492	1	NA	NA	NA	NA	0.390224	1	NA	NA	-1.6068	7.66531e-15	NA	NA	NA	NA
CDK9	NA	NA	NA	NA	NA	NA	-0.306553	1	NA	NA	NA	NA	NA	NA	NA	NA	NA	NA	NA	NA	NA	NA	NA	NA	NA	NA	0.531029	1	NA	NA
CDKL1	NA	NA	NA	NA	NA	NA	NA	NA	NA	NA	NA	NA	NA	NA	NA	NA	NA	NA	NA	NA	NA	NA	NA	NA	NA	NA	-0.643222	1	NA	NA
CDKN1A	-1.13137	3.78441e-104	-0.525259	1	-0.683654	1	NA	NA	NA	NA	NA	NA	NA	NA	NA	NA	NA	NA	NA	NA	0.340387	1	0.429303	1	-0.264139	1	-1.22525	1	-0.41841	1
CDKN1B	0.39969	6.23493e-76	NA	NA	0.346168	1	NA	NA	NA	NA	NA	NA	NA	NA	-0.300701	1	NA	NA	NA	NA	NA	NA	NA	NA	0.298933	1	0.886576	1	0.25809	1
CDKN1C	NA	NA	-0.792631	0.0185972	NA	NA	NA	NA	NA	NA	NA	NA	NA	NA	NA	NA	NA	NA	NA	NA	NA	NA	NA	NA	-0.565187	0.10705	NA	NA	NA	NA
CDKN2AIP	NA	NA	NA	NA	NA	NA	NA	NA	NA	NA	NA	NA	NA	NA	-0.274552	1	NA	NA	NA	NA	NA	NA	NA	NA	0.366378	1	1.40788	1	NA	NA
CDKN2D	0.472717	2.99088e-78	0.382374	1	0.437287	1	NA	NA	NA	NA	NA	NA	NA	NA	NA	NA	NA	NA	NA	NA	NA	NA	NA	NA	0.42809	1	-1.68222	1	NA	NA
CDS2	NA	NA	NA	NA	NA	NA	NA	NA	NA	NA	NA	NA	NA	NA	NA	NA	NA	NA	NA	NA	NA	NA	NA	NA	NA	NA	-2.00797	1	NA	NA
CEBPB	-0.726031	1.39664e-44	NA	NA	NA	NA	-0.323996	1	NA	NA	NA	NA	NA	NA	NA	NA	NA	NA	NA	NA	NA	NA	0.424927	1	0.254014	1	NA	NA	NA	NA
CEBPD	NA	NA	-0.35772	1	NA	NA	NA	NA	NA	NA	NA	NA	NA	NA	0.472598	1	NA	NA	NA	NA	NA	NA	0.717601	0.0818443	NA	NA	NA	NA	NA	NA
CELF1	0.456647	1.41546e-63	NA	NA	0.579029	1	NA	NA	NA	NA	NA	NA	NA	NA	-0.298914	1	NA	NA	NA	NA	NA	NA	NA	NA	NA	NA	0.622453	1	NA	NA
CELF2	0.371229	1.25318e-60	-0.286178	1	NA	NA	NA	NA	NA	NA	NA	NA	NA	NA	-0.472671	1	NA	NA	NA	NA	NA	NA	NA	NA	-0.772422	1.63709e-05	1.01682	1	NA	NA
CENPC	NA	NA	NA	NA	NA	NA	-0.261704	1	NA	NA	NA	NA	NA	NA	NA	NA	NA	NA	NA	NA	NA	NA	NA	NA	NA	NA	2.12355	1	0.645577	0.0117381
CENPT	NA	NA	NA	NA	NA	NA	NA	NA	NA	NA	NA	NA	NA	NA	NA	NA	NA	NA	NA	NA	NA	NA	NA	NA	NA	NA	-1.06284	1	NA	NA
CENPX	NA	NA	NA	NA	NA	NA	-0.369432	1	NA	NA	NA	NA	NA	NA	NA	NA	NA	NA	NA	NA	NA	NA	NA	NA	NA	NA	0.787238	1	NA	NA
CEP126	NA	NA	NA	NA	NA	NA	NA	NA	NA	NA	NA	NA	NA	NA	NA	NA	NA	NA	NA	NA	NA	NA	NA	NA	-0.265818	0.691637	NA	NA	NA	NA
CEP170	NA	NA	NA	NA	NA	NA	NA	NA	NA	NA	NA	NA	NA	NA	NA	NA	NA	NA	NA	NA	NA	NA	NA	NA	-0.397988	0.306582	NA	NA	NA	NA
CEP350	NA	NA	NA	NA	NA	NA	0.380638	1	NA	NA	NA	NA	NA	NA	-0.283788	1	NA	NA	NA	NA	NA	NA	NA	NA	-0.323877	0.279428	NA	NA	0.292403	1
CEP57	NA	NA	NA	NA	NA	NA	NA	NA	NA	NA	NA	NA	NA	NA	NA	NA	NA	NA	NA	NA	NA	NA	NA	NA	-0.252665	0.0566782	-1.0508	1	NA	NA
CEP78	NA	NA	NA	NA	NA	NA	NA	NA	NA	NA	NA	NA	NA	NA	-0.304911	1	NA	NA	NA	NA	NA	NA	NA	NA	NA	NA	NA	NA	-0.468196	1
CERS2	NA	NA	NA	NA	NA	NA	NA	NA	NA	NA	NA	NA	NA	NA	NA	NA	NA	NA	NA	NA	NA	NA	NA	NA	-0.271523	1	-2.5974	1	NA	NA
CERT1	0.795627	4.83162e-195	0.56329	2.04518e-13	0.765785	9.17502e-07	NA	NA	NA	NA	NA	NA	NA	NA	-0.312007	1	NA	NA	NA	NA	NA	NA	NA	NA	0.292034	1	NA	NA	0.416424	1
CETN2	NA	NA	NA	NA	0.323312	0.256199	NA	NA	NA	NA	NA	NA	NA	NA	NA	NA	NA	NA	NA	NA	NA	NA	NA	NA	-0.321616	0.0144118	1.09664	1	NA	NA
CFAP20	NA	NA	NA	NA	0.329185	1	NA	NA	-0.256884	1.24116e-83	NA	NA	NA	NA	-0.321665	1	NA	NA	NA	NA	NA	NA	NA	NA	NA	NA	NA	NA	NA	NA
CFAP298	NA	NA	NA	NA	NA	NA	NA	NA	NA	NA	NA	NA	NA	NA	NA	NA	NA	NA	NA	NA	0.286466	0.238916	NA	NA	-0.25413	0.750051	NA	NA	NA	NA
CFD	-0.729601	1.17639e-66	-0.673022	0.000110358	0.578421	1	NA	NA	NA	NA	NA	NA	NA	NA	NA	NA	NA	NA	NA	NA	NA	NA	NA	NA	NA	NA	NA	NA	NA	NA
CFL1	0.721613	3.74735e-111	0.48396	3.23351e-08	0.481232	0.104411	NA	NA	NA	NA	NA	NA	NA	NA	NA	NA	NA	NA	NA	NA	NA	NA	-0.314917	0.122792	NA	NA	-1.97295	1	-0.371529	0.0505423
CFLAR	NA	NA	NA	NA	NA	NA	-0.430064	1	NA	NA	NA	NA	NA	NA	NA	NA	NA	NA	NA	NA	NA	NA	NA	NA	0.354818	1	NA	NA	0.54114	1
CGAS	NA	NA	NA	NA	NA	NA	-0.482102	1	NA	NA	NA	NA	NA	NA	NA	NA	NA	NA	NA	NA	NA	NA	NA	NA	NA	NA	NA	NA	NA	NA
CGGBP1	NA	NA	NA	NA	0.257088	1	NA	NA	NA	NA	NA	NA	NA	NA	-0.275422	1	NA	NA	NA	NA	NA	NA	NA	NA	NA	NA	-0.979174	1	NA	NA
CGRRF1	NA	NA	NA	NA	NA	NA	0.330828	1	NA	NA	NA	NA	NA	NA	NA	NA	NA	NA	NA	NA	NA	NA	NA	NA	NA	NA	-0.828397	1	NA	NA
CHCHD10	-0.377895	2.34902e-58	-0.480794	0.245185	NA	NA	NA	NA	NA	NA	NA	NA	NA	NA	NA	NA	NA	NA	NA	NA	0.556374	1.22387e-06	NA	NA	0.40065	1	NA	NA	NA	NA
CHCHD2	NA	NA	NA	NA	0.262104	1	-0.262693	1	NA	NA	NA	NA	NA	NA	NA	NA	NA	NA	NA	NA	NA	NA	NA	NA	NA	NA	-0.819615	1	-0.292682	0.00392883
CHD1	NA	NA	-0.368864	1	-0.521672	1	NA	NA	NA	NA	NA	NA	NA	NA	-0.472062	1	NA	NA	NA	NA	NA	NA	NA	NA	NA	NA	2.63869	1	0.54394	0.126957
CHD1L	NA	NA	NA	NA	NA	NA	NA	NA	NA	NA	NA	NA	NA	NA	NA	NA	NA	NA	NA	NA	NA	NA	NA	NA	-0.302759	1	-0.886309	1	NA	NA
CHD2	NA	NA	NA	NA	NA	NA	NA	NA	NA	NA	NA	NA	NA	NA	NA	NA	NA	NA	NA	NA	NA	NA	NA	NA	0.469352	1	2.56573	1	1.05887	9.98969e-10
CHD4	-0.257186	2.96683e-50	NA	NA	0.258143	1	NA	NA	NA	NA	NA	NA	NA	NA	NA	NA	NA	NA	NA	NA	NA	NA	NA	NA	-0.444525	0.311763	NA	NA	-0.431056	1
CHD6	NA	NA	NA	NA	NA	NA	0.420505	1	NA	NA	NA	NA	NA	NA	NA	NA	NA	NA	NA	NA	NA	NA	NA	NA	NA	NA	NA	NA	0.918587	0.00865714
CHD7	NA	NA	NA	NA	NA	NA	NA	NA	NA	NA	NA	NA	NA	NA	NA	NA	NA	NA	NA	NA	NA	NA	NA	NA	0.638075	1	0.622453	1	0.888876	0.0416153
CHD9	NA	NA	NA	NA	NA	NA	NA	NA	NA	NA	NA	NA	NA	NA	NA	NA	NA	NA	NA	NA	NA	NA	NA	NA	-0.505823	0.278399	-1.67098	1	NA	NA
CHI3L2	NA	NA	NA	NA	NA	NA	NA	NA	NA	NA	NA	NA	NA	NA	NA	NA	NA	NA	NA	NA	NA	NA	-0.342937	1	NA	NA	NA	NA	NA	NA
CHMP1B	-0.777181	1.96328e-77	-0.587104	0.413067	-1.23965	0.00105276	NA	NA	NA	NA	NA	NA	NA	NA	-0.407018	1	-0.350128	2.75549e-15	NA	NA	NA	NA	NA	NA	NA	NA	0.965423	1	-0.417703	0.0468896
CHMP2A	0.313998	2.89296e-37	0.597153	2.68156e-07	0.42133	1	NA	NA	NA	NA	NA	NA	NA	NA	NA	NA	NA	NA	NA	NA	NA	NA	NA	NA	-0.362453	0.00010579	-0.769724	1	NA	NA
CHORDC1	NA	NA	NA	NA	NA	NA	NA	NA	NA	NA	NA	NA	NA	NA	-0.3053	1	NA	NA	NA	NA	NA	NA	NA	NA	NA	NA	2.37819	1	NA	NA
CHPT1	NA	NA	NA	NA	NA	NA	NA	NA	NA	NA	NA	NA	NA	NA	NA	NA	NA	NA	NA	NA	NA	NA	NA	NA	-0.272868	0.00520898	1.21965	1	NA	NA
CHST11	NA	NA	NA	NA	NA	NA	NA	NA	NA	NA	NA	NA	NA	NA	NA	NA	NA	NA	NA	NA	NA	NA	NA	NA	-0.312458	0.163785	NA	NA	NA	NA
CHST12	NA	NA	NA	NA	NA	NA	-0.259318	1	NA	NA	NA	NA	NA	NA	NA	NA	NA	NA	NA	NA	NA	NA	NA	NA	-0.285315	1	-1.49905	1	-0.269817	1
CHST7	NA	NA	-0.278347	1	NA	NA	NA	NA	NA	NA	NA	NA	NA	NA	NA	NA	NA	NA	NA	NA	NA	NA	NA	NA	NA	NA	NA	NA	NA	NA
CHTOP	NA	NA	NA	NA	NA	NA	-0.281867	1	NA	NA	NA	NA	NA	NA	NA	NA	NA	NA	NA	NA	NA	NA	NA	NA	NA	NA	NA	NA	0.279344	1
CIAO2A	0.495395	1.04194e-152	0.47341	1.57616e-18	0.699232	7.50667e-06	0.377227	1	NA	NA	NA	NA	NA	NA	-0.279079	1	NA	NA	NA	NA	NA	NA	NA	NA	NA	NA	NA	NA	NA	NA
CIAO2B	0.827563	5.53232e-245	1.01481	7.7653e-25	0.852214	7.37851e-07	0.532094	1	NA	NA	NA	NA	NA	NA	-0.781371	1.86379e-06	NA	NA	NA	NA	NA	NA	NA	NA	0.492691	1	NA	NA	NA	NA
CIB1	-0.273884	9.44999e-62	NA	NA	-0.407569	1	NA	NA	NA	NA	NA	NA	NA	NA	NA	NA	NA	NA	NA	NA	NA	NA	NA	NA	0.391101	0.280095	-1.01761	1	NA	NA
CIITA	-0.279703	1.9666e-12	NA	NA	-0.793348	0.191711	NA	NA	NA	NA	NA	NA	NA	NA	NA	NA	NA	NA	NA	NA	NA	NA	NA	NA	NA	NA	NA	NA	NA	NA
CIRBP	NA	NA	-0.520645	0.000827448	-0.541647	1	NA	NA	NA	NA	NA	NA	-0.254176	5.15182e-14	NA	NA	-0.319432	6.84354e-24	NA	NA	-0.287515	0.860364	-0.303737	1	NA	NA	-0.589669	1	-0.489567	0.000220298
CISH	NA	NA	NA	NA	NA	NA	NA	NA	NA	NA	NA	NA	NA	NA	-0.294793	1	NA	NA	NA	NA	NA	NA	NA	NA	NA	NA	NA	NA	NA	NA
CITED2	0.344323	8.43613e-42	NA	NA	0.273188	1	0.376597	1	NA	NA	NA	NA	NA	NA	NA	NA	NA	NA	NA	NA	-0.312562	1	0.276138	1	0.658334	1	NA	NA	0.518754	1
CKAP2	NA	NA	NA	NA	NA	NA	-0.266646	1	NA	NA	NA	NA	NA	NA	NA	NA	NA	NA	NA	NA	NA	NA	NA	NA	-0.379021	1	NA	NA	NA	NA
CKB	NA	NA	-0.302973	1	NA	NA	NA	NA	NA	NA	NA	NA	NA	NA	NA	NA	NA	NA	NA	NA	NA	NA	NA	NA	NA	NA	NA	NA	NA	NA
CKS2	NA	NA	NA	NA	-0.53509	1	0.51838	1	NA	NA	NA	NA	NA	NA	-0.317952	1	NA	NA	NA	NA	NA	NA	NA	NA	NA	NA	NA	NA	NA	NA
CLASP2	NA	NA	NA	NA	NA	NA	-0.296297	1	NA	NA	NA	NA	NA	NA	NA	NA	NA	NA	NA	NA	NA	NA	NA	NA	NA	NA	0.622453	1	NA	NA
CLDN5	NA	NA	NA	NA	NA	NA	NA	NA	NA	NA	NA	NA	NA	NA	NA	NA	NA	NA	NA	NA	NA	NA	NA	NA	NA	NA	-2.8846	1	NA	NA
CLDND1	NA	NA	NA	NA	NA	NA	NA	NA	NA	NA	NA	NA	NA	NA	-0.331401	1	-0.261114	1.77587e-09	NA	NA	NA	NA	-0.316533	1	NA	NA	NA	NA	NA	NA
CLEC11A	NA	NA	NA	NA	NA	NA	0.321926	1	NA	NA	NA	NA	NA	NA	NA	NA	NA	NA	NA	NA	NA	NA	NA	NA	-0.330327	0.654954	NA	NA	NA	NA
CLEC1B	NA	NA	NA	NA	NA	NA	NA	NA	NA	NA	NA	NA	NA	NA	NA	NA	NA	NA	NA	NA	NA	NA	NA	NA	NA	NA	-3.7779	1	NA	NA
CLEC2B	NA	NA	-0.426351	1	NA	NA	0.514932	1	0.489367	1.52326e-111	NA	NA	0.323923	0.00312057	NA	NA	NA	NA	NA	NA	NA	NA	NA	NA	0.64281	0.0202764	0.688082	1	NA	NA
CLEC2D	NA	NA	NA	NA	-0.254117	1	NA	NA	NA	NA	-0.270704	1.08211e-44	NA	NA	-0.495833	1	NA	NA	NA	NA	NA	NA	NA	NA	0.905611	0.0524412	0.612073	1	NA	NA
CLEC2L	NA	NA	NA	NA	NA	NA	NA	NA	NA	NA	NA	NA	NA	NA	NA	NA	NA	NA	NA	NA	NA	NA	NA	NA	NA	NA	-1.30052	1	NA	NA
CLEC4A	-0.283057	7.1325e-36	NA	NA	-0.350954	1	NA	NA	NA	NA	NA	NA	NA	NA	NA	NA	NA	NA	NA	NA	NA	NA	NA	NA	NA	NA	NA	NA	NA	NA
CLEC4E	-0.806015	1.21962e-49	0.503447	6.71019e-06	0.3608	0.00792403	NA	NA	NA	NA	NA	NA	NA	NA	NA	NA	NA	NA	NA	NA	NA	NA	NA	NA	NA	NA	NA	NA	NA	NA
CLEC7A	-0.773759	1.95664e-71	-0.597635	0.000779603	0.316933	1	NA	NA	NA	NA	NA	NA	NA	NA	NA	NA	NA	NA	NA	NA	NA	NA	NA	NA	NA	NA	NA	NA	NA	NA
CLECL1	NA	NA	NA	NA	NA	NA	NA	NA	NA	NA	NA	NA	NA	NA	NA	NA	NA	NA	NA	NA	-0.360145	1	NA	NA	NA	NA	NA	NA	NA	NA
CLIC1	NA	NA	0.488031	2.61718e-06	NA	NA	-0.351419	1	NA	NA	NA	NA	NA	NA	NA	NA	NA	NA	NA	NA	-0.405343	0.00307441	NA	NA	-1.33136	3.80737e-13	-3.02351	1	-0.646813	0.0890718
CLIC2	NA	NA	NA	NA	-0.465076	1	NA	NA	NA	NA	NA	NA	NA	NA	NA	NA	NA	NA	NA	NA	NA	NA	NA	NA	NA	NA	NA	NA	NA	NA
CLIC3	NA	NA	NA	NA	NA	NA	-0.48231	1	NA	NA	NA	NA	NA	NA	NA	NA	-0.30277	8.62078e-06	NA	NA	NA	NA	NA	NA	NA	NA	NA	NA	NA	NA
CLINT1	NA	NA	NA	NA	0.301652	1	-0.417985	1	NA	NA	NA	NA	NA	NA	NA	NA	NA	NA	NA	NA	NA	NA	NA	NA	-0.271156	0.222807	-1.15838	1	0.279433	1
CLK1	NA	NA	-0.253606	1	-0.297114	1	0.28216	1	NA	NA	NA	NA	NA	NA	NA	NA	NA	NA	0.270713	0.00219224	0.285328	1	NA	NA	0.453489	1	0.892369	1	0.453716	1
CLK4	NA	NA	NA	NA	NA	NA	NA	NA	NA	NA	NA	NA	NA	NA	-0.275724	1	NA	NA	NA	NA	NA	NA	NA	NA	NA	NA	1.78676	1	0.346743	1
CLMN	NA	NA	NA	NA	0.27473	1	-0.28621	1	NA	NA	NA	NA	NA	NA	NA	NA	NA	NA	NA	NA	NA	NA	NA	NA	NA	NA	NA	NA	NA	NA
CLN5	NA	NA	NA	NA	NA	NA	-0.300855	1	NA	NA	NA	NA	NA	NA	NA	NA	NA	NA	NA	NA	NA	NA	NA	NA	NA	NA	NA	NA	NA	NA
CLNS1A	NA	NA	NA	NA	NA	NA	NA	NA	NA	NA	NA	NA	NA	NA	NA	NA	NA	NA	NA	NA	NA	NA	NA	NA	-0.334703	0.00174065	NA	NA	NA	NA
CLPTM1L	NA	NA	NA	NA	NA	NA	NA	NA	NA	NA	NA	NA	NA	NA	NA	NA	NA	NA	NA	NA	NA	NA	NA	NA	-0.272022	1	NA	NA	NA	NA
CLTA	NA	NA	0.337752	0.727607	0.427214	1	NA	NA	NA	NA	NA	NA	NA	NA	NA	NA	NA	NA	NA	NA	-0.321896	1	NA	NA	-0.650121	0.000134172	-1.715	1	NA	NA
CLU	1.78761	0	0.683513	1.6034e-16	1.39348	6.12316e-11	NA	NA	NA	NA	NA	NA	NA	NA	NA	NA	NA	NA	NA	NA	NA	NA	NA	NA	-0.277915	1	-1.40128	1	NA	NA
CMAS	NA	NA	NA	NA	NA	NA	NA	NA	NA	NA	NA	NA	NA	NA	NA	NA	NA	NA	NA	NA	NA	NA	NA	NA	NA	NA	-1.24327	1	NA	NA
CMC1	NA	NA	NA	NA	NA	NA	NA	NA	NA	NA	-0.481084	2.41313e-27	NA	NA	-0.322224	1	-0.299479	2.48674e-09	NA	NA	NA	NA	-0.680478	1	NA	NA	NA	NA	-0.944229	0.00239601
CMC2	NA	NA	-0.28408	1	NA	NA	-0.284874	1	NA	NA	-0.270009	2.1601e-28	NA	NA	NA	NA	NA	NA	NA	NA	NA	NA	NA	NA	NA	NA	NA	NA	-0.546685	1
CMIP	-0.28271	8.83805e-55	NA	NA	-0.34986	1	NA	NA	NA	NA	NA	NA	NA	NA	NA	NA	NA	NA	NA	NA	NA	NA	NA	NA	NA	NA	-2.42603	1	-0.452389	1
CMTM3	NA	NA	NA	NA	NA	NA	NA	NA	NA	NA	NA	NA	NA	NA	NA	NA	NA	NA	NA	NA	NA	NA	NA	NA	-0.279912	1	NA	NA	NA	NA
CMTM5	NA	NA	NA	NA	NA	NA	NA	NA	NA	NA	NA	NA	NA	NA	NA	NA	NA	NA	NA	NA	NA	NA	NA	NA	NA	NA	-2.7555	1	NA	NA
CMTM6	NA	NA	-0.315094	1	NA	NA	NA	NA	NA	NA	NA	NA	NA	NA	-0.3093	1	NA	NA	NA	NA	NA	NA	NA	NA	-0.286137	1	-2.35493	1	-0.428153	1
CMTR2	NA	NA	NA	NA	NA	NA	NA	NA	NA	NA	NA	NA	NA	NA	-0.250979	1	NA	NA	NA	NA	NA	NA	NA	NA	NA	NA	NA	NA	NA	NA
CNBP	NA	NA	0.265807	1	0.310217	1	NA	NA	NA	NA	NA	NA	NA	NA	NA	NA	NA	NA	NA	NA	NA	NA	NA	NA	NA	NA	-0.64682	1	NA	NA
CNIH1	NA	NA	NA	NA	0.369034	1	-0.291555	1	NA	NA	NA	NA	NA	NA	NA	NA	NA	NA	NA	NA	NA	NA	NA	NA	NA	NA	0.801992	1	NA	NA
CNN3	NA	NA	NA	NA	NA	NA	NA	NA	NA	NA	NA	NA	NA	NA	NA	NA	NA	NA	NA	NA	NA	NA	NA	NA	-0.296239	1	NA	NA	NA	NA
CNOT6L	NA	NA	-0.340273	1	NA	NA	0.474732	1	NA	NA	NA	NA	NA	NA	NA	NA	NA	NA	NA	NA	NA	NA	NA	NA	0.730044	0.00264105	-0.25132	1	0.450859	0.0206201
CNOT7	NA	NA	NA	NA	NA	NA	NA	NA	NA	NA	NA	NA	NA	NA	NA	NA	NA	NA	NA	NA	NA	NA	NA	NA	NA	NA	-1.52222	1	NA	NA
CNPPD1	NA	NA	NA	NA	-0.311764	1	NA	NA	NA	NA	NA	NA	NA	NA	NA	NA	NA	NA	NA	NA	NA	NA	NA	NA	NA	NA	NA	NA	NA	NA
CNPY3	-0.372938	9.18972e-64	NA	NA	NA	NA	NA	NA	NA	NA	NA	NA	NA	NA	NA	NA	NA	NA	NA	NA	NA	NA	NA	NA	-0.32623	0.511843	NA	NA	NA	NA
CNRIP1	NA	NA	NA	NA	NA	NA	NA	NA	NA	NA	NA	NA	NA	NA	NA	NA	NA	NA	NA	NA	NA	NA	NA	NA	-0.317719	1	NA	NA	NA	NA
COL4A3BP	-0.510073	8.9084e-59	-0.859196	3.88926e-17	-0.438082	1	NA	NA	NA	NA	NA	NA	NA	NA	NA	NA	NA	NA	NA	NA	NA	NA	NA	NA	-0.273353	0.688674	NA	NA	NA	NA
COMMD3	NA	NA	NA	NA	NA	NA	NA	NA	NA	NA	NA	NA	NA	NA	NA	NA	NA	NA	NA	NA	NA	NA	NA	NA	-0.366091	0.0167996	1.572	1	NA	NA
COMMD4	NA	NA	NA	NA	0.321936	1	NA	NA	NA	NA	NA	NA	NA	NA	NA	NA	NA	NA	NA	NA	NA	NA	NA	NA	-0.251878	1	-0.837506	1	NA	NA
COMMD6	-0.390986	4.10824e-55	-0.369621	0.12564	-0.458469	1	NA	NA	NA	NA	NA	NA	NA	NA	NA	NA	NA	NA	NA	NA	NA	NA	NA	NA	NA	NA	NA	NA	-0.726692	7.25548e-06
COMMD7	NA	NA	NA	NA	0.354237	0.17869	NA	NA	NA	NA	NA	NA	NA	NA	NA	NA	NA	NA	NA	NA	NA	NA	NA	NA	-0.482301	0.00170226	-1.94841	1	NA	NA
COMT	NA	NA	0.543733	2.5444e-05	NA	NA	NA	NA	NA	NA	NA	NA	NA	NA	-0.28182	1	NA	NA	NA	NA	NA	NA	NA	NA	-0.603204	8.10158e-05	NA	NA	NA	NA
COPE	NA	NA	NA	NA	0.384346	1	NA	NA	NA	NA	NA	NA	NA	NA	0.287403	1	NA	NA	NA	NA	NA	NA	NA	NA	-0.292075	0.00657796	0.621938	1	NA	NA
COPS2	0.347406	1.66885e-68	NA	NA	0.281791	1	-0.290244	1	NA	NA	NA	NA	NA	NA	NA	NA	NA	NA	NA	NA	NA	NA	NA	NA	NA	NA	1.22811	1	NA	NA
COPS4	NA	NA	NA	NA	NA	NA	NA	NA	NA	NA	NA	NA	NA	NA	NA	NA	NA	NA	NA	NA	NA	NA	-0.25096	1	NA	NA	NA	NA	NA	NA
COPS7A	NA	NA	NA	NA	0.310328	0.0549008	-0.289023	1	NA	NA	NA	NA	NA	NA	NA	NA	NA	NA	NA	NA	NA	NA	NA	NA	NA	NA	NA	NA	NA	NA
COPZ1	NA	NA	NA	NA	0.329163	1	0.351991	1	NA	NA	NA	NA	NA	NA	NA	NA	NA	NA	NA	NA	NA	NA	NA	NA	-0.305519	0.881617	NA	NA	NA	NA
COQ4	NA	NA	NA	NA	NA	NA	NA	NA	NA	NA	NA	NA	NA	NA	NA	NA	NA	NA	NA	NA	NA	NA	NA	NA	NA	NA	-0.421388	1	NA	NA
CORO1A	NA	NA	-0.255589	1	-0.333018	1	NA	NA	NA	NA	NA	NA	NA	NA	NA	NA	NA	NA	NA	NA	-0.3079	1	NA	NA	NA	NA	1.79997	1	NA	NA
CORO1C	0.451144	5.13759e-63	0.607447	1.15259e-05	0.550156	1	-0.321955	1	NA	NA	NA	NA	NA	NA	NA	NA	NA	NA	NA	NA	NA	NA	NA	NA	NA	NA	-0.498337	1	NA	NA
CORO7	NA	NA	NA	NA	NA	NA	-0.493667	1	NA	NA	NA	NA	NA	NA	NA	NA	NA	NA	NA	NA	NA	NA	NA	NA	NA	NA	0.787238	1	NA	NA
COTL1	-0.31402	6.1639e-16	-0.315118	1	NA	NA	-0.308998	1	NA	NA	NA	NA	NA	NA	NA	NA	NA	NA	-0.290159	0.0215548	-0.617601	0.000642376	-0.565877	6.49942e-06	NA	NA	-0.848132	1	-0.439584	1
COX14	NA	NA	NA	NA	NA	NA	NA	NA	NA	NA	NA	NA	NA	NA	NA	NA	NA	NA	NA	NA	NA	NA	NA	NA	0.278835	0.00125182	-1.52146	1	NA	NA
COX4I1	-0.319886	3.45108e-24	-0.293146	1	NA	NA	NA	NA	NA	NA	NA	NA	NA	NA	NA	NA	NA	NA	NA	NA	NA	NA	NA	NA	NA	NA	NA	NA	-0.901699	4.65373e-07
COX5A	NA	NA	NA	NA	NA	NA	-0.376625	1	NA	NA	NA	NA	NA	NA	0.338501	1	NA	NA	NA	NA	NA	NA	NA	NA	-0.517189	0.00259784	-1.20132	1	NA	NA
COX5B	NA	NA	NA	NA	0.536278	0.356095	NA	NA	NA	NA	NA	NA	NA	NA	0.294583	1	NA	NA	NA	NA	NA	NA	NA	NA	-0.295247	1	0.478539	1	NA	NA
COX6A1	NA	NA	NA	NA	NA	NA	NA	NA	NA	NA	NA	NA	NA	NA	0.621654	0.000852109	NA	NA	NA	NA	NA	NA	NA	NA	NA	NA	-1.81694	1	NA	NA
COX6B1	NA	NA	NA	NA	NA	NA	NA	NA	NA	NA	NA	NA	NA	NA	0.323582	1	NA	NA	NA	NA	NA	NA	NA	NA	-0.546447	0.0128047	-2.38868	1	-0.529671	0.0206958
COX6C	NA	NA	NA	NA	NA	NA	NA	NA	NA	NA	NA	NA	NA	NA	0.322366	1	NA	NA	NA	NA	NA	NA	NA	NA	NA	NA	0.373208	1	-0.4502	0.013016
COX7A2	NA	NA	0.384545	0.00689902	0.452056	1	NA	NA	NA	NA	NA	NA	NA	NA	0.266863	1	NA	NA	NA	NA	NA	NA	NA	NA	-0.367389	0.359726	NA	NA	NA	NA
COX7A2L	NA	NA	-0.383103	0.00206464	NA	NA	-0.298861	1	NA	NA	NA	NA	NA	NA	NA	NA	NA	NA	NA	NA	NA	NA	-0.307462	1	NA	NA	NA	NA	NA	NA
COX7B	NA	NA	0.275719	1	0.587806	0.638573	NA	NA	NA	NA	NA	NA	NA	NA	NA	NA	NA	NA	NA	NA	NA	NA	NA	NA	NA	NA	-1.39011	1	NA	NA
CPA3	NA	NA	NA	NA	NA	NA	NA	NA	NA	NA	NA	NA	NA	NA	NA	NA	NA	NA	NA	NA	NA	NA	NA	NA	-0.747621	2.99393e-06	NA	NA	NA	NA
CPEB2	-0.304718	3.2107e-26	NA	NA	NA	NA	-0.339408	1	NA	NA	NA	NA	NA	NA	NA	NA	NA	NA	NA	NA	NA	NA	NA	NA	NA	NA	NA	NA	NA	NA
CPEB4	NA	NA	0.2852	0.574136	NA	NA	-0.339389	1	NA	NA	NA	NA	NA	NA	NA	NA	NA	NA	NA	NA	0.865608	3.5602e-06	NA	NA	NA	NA	NA	NA	NA	NA
CPNE1	NA	NA	NA	NA	NA	NA	NA	NA	NA	NA	NA	NA	NA	NA	NA	NA	NA	NA	NA	NA	NA	NA	NA	NA	-0.547398	2.63094e-06	NA	NA	NA	NA
CPNE3	NA	NA	NA	NA	-0.374835	1	NA	NA	NA	NA	NA	NA	NA	NA	NA	NA	NA	NA	NA	NA	NA	NA	NA	NA	-0.304934	1	NA	NA	NA	NA
CPNE5	NA	NA	NA	NA	NA	NA	NA	NA	NA	NA	NA	NA	NA	NA	NA	NA	NA	NA	NA	NA	NA	NA	NA	NA	NA	NA	-1.27295	1	NA	NA
CPPED1	NA	NA	NA	NA	NA	NA	NA	NA	NA	NA	NA	NA	NA	NA	NA	NA	NA	NA	NA	NA	NA	NA	NA	NA	-0.643962	0.0144543	NA	NA	NA	NA
CPQ	NA	NA	0.292529	1	NA	NA	-0.350634	1	NA	NA	NA	NA	NA	NA	NA	NA	NA	NA	NA	NA	NA	NA	NA	NA	NA	NA	NA	NA	NA	NA
CPSF6	NA	NA	NA	NA	NA	NA	NA	NA	NA	NA	NA	NA	NA	NA	NA	NA	NA	NA	NA	NA	NA	NA	NA	NA	-0.290872	0.275027	NA	NA	NA	NA
CPT1A	0.424544	1.06792e-100	0.394073	8.96107e-05	0.5564	0.042041	NA	NA	NA	NA	NA	NA	NA	NA	0.313495	1	NA	NA	NA	NA	NA	NA	0.290849	0.222864	-0.250055	0.426426	NA	NA	NA	NA
CPVL	-0.542138	2.66397e-57	NA	NA	-0.932687	1	NA	NA	NA	NA	NA	NA	NA	NA	NA	NA	NA	NA	NA	NA	NA	NA	NA	NA	-0.379681	0.00371354	NA	NA	NA	NA
CPXM1	NA	NA	NA	NA	NA	NA	NA	NA	NA	NA	NA	NA	NA	NA	NA	NA	NA	NA	NA	NA	NA	NA	NA	NA	-0.333766	0.00842212	NA	NA	NA	NA
CRAT	NA	NA	NA	NA	0.250333	1	NA	NA	NA	NA	NA	NA	NA	NA	NA	NA	NA	NA	NA	NA	NA	NA	NA	NA	NA	NA	-1.55656	1	NA	NA
CRBN	NA	NA	NA	NA	NA	NA	NA	NA	NA	NA	NA	NA	NA	NA	NA	NA	NA	NA	NA	NA	NA	NA	-0.352364	1	NA	NA	-1.77478	1	NA	NA
CREB1	NA	NA	NA	NA	0.300374	1	-0.267871	1	NA	NA	NA	NA	NA	NA	NA	NA	NA	NA	NA	NA	NA	NA	NA	NA	NA	NA	NA	NA	0.33521	1
CREB3L2	NA	NA	NA	NA	NA	NA	-0.339508	1	NA	NA	NA	NA	NA	NA	NA	NA	NA	NA	NA	NA	0.282024	1	NA	NA	-0.33208	1	NA	NA	NA	NA
CREBBP	NA	NA	NA	NA	NA	NA	NA	NA	NA	NA	NA	NA	NA	NA	-0.336673	1	NA	NA	NA	NA	NA	NA	NA	NA	NA	NA	NA	NA	0.322313	1
CREG1	0.327331	5.73064e-43	0.872868	2.99394e-14	1.14402	4.12202e-05	NA	NA	NA	NA	NA	NA	NA	NA	NA	NA	NA	NA	NA	NA	NA	NA	NA	NA	-0.501797	0.0123059	-1.22429	1	NA	NA
CREM	-0.494053	1.02858e-33	-0.985159	1.23202e-06	-1.66282	3.98953e-07	NA	NA	-0.445923	2.28272e-219	-0.490533	7.80001e-80	-0.302308	7.22144e-13	-0.527246	0.000128332	-0.698028	9.65478e-67	-0.47632	5.61941e-14	-0.455427	1	NA	NA	0.869757	0.310739	0.932514	1	-0.257878	1
CRHBP	NA	NA	NA	NA	NA	NA	NA	NA	NA	NA	NA	NA	NA	NA	NA	NA	NA	NA	NA	NA	NA	NA	NA	NA	-0.921377	4.31621e-05	NA	NA	NA	NA
CRIP1	NA	NA	NA	NA	-0.684447	1	NA	NA	NA	NA	NA	NA	NA	NA	0.252359	1	NA	NA	NA	NA	-0.317221	1	NA	NA	NA	NA	NA	NA	-0.319764	1
CRIP2	NA	NA	NA	NA	NA	NA	NA	NA	NA	NA	NA	NA	NA	NA	NA	NA	NA	NA	NA	NA	NA	NA	NA	NA	-0.340366	1	1.11452	1	NA	NA
CRK	NA	NA	NA	NA	NA	NA	NA	NA	NA	NA	NA	NA	NA	NA	-0.291991	1	NA	NA	NA	NA	NA	NA	NA	NA	-0.330806	1	NA	NA	NA	NA
CRTAM	NA	NA	NA	NA	NA	NA	NA	NA	NA	NA	NA	NA	NA	NA	NA	NA	NA	NA	NA	NA	NA	NA	-0.330756	1	NA	NA	NA	NA	NA	NA
CRTAP	-0.555908	1.0722e-74	NA	NA	NA	NA	-0.30881	1	NA	NA	NA	NA	NA	NA	NA	NA	NA	NA	NA	NA	NA	NA	NA	NA	NA	NA	NA	NA	NA	NA
CRYBG1	0.265029	7.76331e-70	NA	NA	-0.467561	1	0.585593	1	NA	NA	NA	NA	NA	NA	NA	NA	0.305937	1.29292e-11	NA	NA	NA	NA	NA	NA	0.386266	1	2.10503	1	0.988446	1.50764e-06
CRYGD	NA	NA	NA	NA	NA	NA	NA	NA	NA	NA	NA	NA	NA	NA	NA	NA	NA	NA	NA	NA	NA	NA	NA	NA	-0.268464	0.465123	NA	NA	NA	NA
CRYL1	NA	NA	NA	NA	NA	NA	NA	NA	NA	NA	NA	NA	NA	NA	NA	NA	NA	NA	NA	NA	NA	NA	NA	NA	NA	NA	-1.89998	1	NA	NA
CSDE1	NA	NA	NA	NA	0.374693	1	NA	NA	NA	NA	NA	NA	NA	NA	NA	NA	NA	NA	NA	NA	NA	NA	NA	NA	-0.313399	1	NA	NA	NA	NA
CSF1	NA	NA	NA	NA	NA	NA	NA	NA	NA	NA	NA	NA	NA	NA	NA	NA	NA	NA	NA	NA	NA	NA	NA	NA	-0.367409	1	NA	NA	NA	NA
CSF1R	NA	NA	-0.389866	1	NA	NA	NA	NA	NA	NA	NA	NA	NA	NA	NA	NA	NA	NA	NA	NA	NA	NA	NA	NA	NA	NA	NA	NA	NA	NA
CSF2RA	-0.283247	4.18349e-48	NA	NA	-0.72498	1	NA	NA	NA	NA	NA	NA	NA	NA	NA	NA	NA	NA	NA	NA	NA	NA	NA	NA	NA	NA	NA	NA	NA	NA
CSF2RB	0.496492	1.69779e-83	0.541393	0.000344879	NA	NA	-0.282374	1	NA	NA	NA	NA	NA	NA	NA	NA	NA	NA	NA	NA	NA	NA	NA	NA	NA	NA	NA	NA	NA	NA
CSF3R	-0.350093	5.1528e-38	0.570799	0.0151113	0.430393	1	NA	NA	NA	NA	NA	NA	NA	NA	NA	NA	NA	NA	NA	NA	NA	NA	NA	NA	-0.737425	2.93257e-05	NA	NA	NA	NA
CSGALNACT2	NA	NA	NA	NA	NA	NA	-0.341188	1	NA	NA	NA	NA	NA	NA	-0.27244	1	NA	NA	NA	NA	NA	NA	NA	NA	NA	NA	2.55047	1	NA	NA
CSK	0.465421	4.70462e-78	0.448964	0.00789085	0.401664	1	NA	NA	NA	NA	NA	NA	NA	NA	NA	NA	NA	NA	NA	NA	NA	NA	NA	NA	-0.298042	0.401838	-1.49605	1	NA	NA
CSNK1A1	0.421897	1.24165e-37	NA	NA	0.252544	1	NA	NA	NA	NA	NA	NA	NA	NA	-0.335	1	NA	NA	NA	NA	NA	NA	NA	NA	NA	NA	1.17462	1	NA	NA
CSNK1E	NA	NA	NA	NA	NA	NA	NA	NA	NA	NA	NA	NA	NA	NA	NA	NA	NA	NA	NA	NA	0.266031	0.0499839	NA	NA	-0.278074	1	NA	NA	NA	NA
CSNK1G2	NA	NA	NA	NA	NA	NA	NA	NA	NA	NA	NA	NA	NA	NA	NA	NA	NA	NA	NA	NA	NA	NA	NA	NA	NA	NA	-1.09236	1	0.483238	1
CSNK2B	NA	NA	NA	NA	NA	NA	NA	NA	NA	NA	NA	NA	NA	NA	NA	NA	NA	NA	NA	NA	NA	NA	NA	NA	-0.455925	3.24957e-05	-0.730515	1	NA	NA
CSPP1	NA	NA	NA	NA	NA	NA	NA	NA	NA	NA	NA	NA	NA	NA	NA	NA	NA	NA	NA	NA	NA	NA	NA	NA	-0.29493	1	NA	NA	NA	NA
CSRNP1	-0.700804	3.72436e-76	-0.557698	0.00039512	-0.823479	0.12137	NA	NA	NA	NA	NA	NA	NA	NA	0.278056	1	NA	NA	NA	NA	NA	NA	NA	NA	NA	NA	NA	NA	NA	NA
CST3	-1.16648	5.12336e-168	-0.897405	4.48797e-16	-1.96016	4.89896e-12	-0.482446	1	NA	NA	NA	NA	NA	NA	-0.48455	1	NA	NA	NA	NA	NA	NA	NA	NA	-0.618298	0.000115803	-1.56081	1	NA	NA
CST7	NA	NA	NA	NA	-1.64699	1.76671e-05	NA	NA	NA	NA	-0.451974	3.28603e-27	NA	NA	NA	NA	NA	NA	NA	NA	NA	NA	NA	NA	NA	NA	-1.8114	1	-1.3904	7.10505e-08
CSTB	NA	NA	0.773144	1.03206e-08	NA	NA	NA	NA	NA	NA	NA	NA	NA	NA	NA	NA	NA	NA	NA	NA	NA	NA	NA	NA	-0.474415	0.788261	NA	NA	NA	NA
CTBP1	NA	NA	NA	NA	NA	NA	-0.284104	1	NA	NA	NA	NA	NA	NA	NA	NA	NA	NA	NA	NA	NA	NA	NA	NA	NA	NA	-0.964072	1	0.516258	1
CTDSP1	NA	NA	NA	NA	0.250361	1	NA	NA	NA	NA	NA	NA	NA	NA	NA	NA	NA	NA	NA	NA	NA	NA	NA	NA	-0.277689	1	0.263216	1	NA	NA
CTDSP2	NA	NA	NA	NA	0.2563	1	NA	NA	NA	NA	NA	NA	NA	NA	NA	NA	NA	NA	NA	NA	NA	NA	NA	NA	-0.277914	1	NA	NA	NA	NA
CTDSPL	NA	NA	NA	NA	NA	NA	NA	NA	NA	NA	NA	NA	NA	NA	NA	NA	NA	NA	NA	NA	NA	NA	NA	NA	-0.324705	0.0712774	-1.26406	1	NA	NA
CTDSPL2	NA	NA	NA	NA	NA	NA	-0.293497	1	NA	NA	NA	NA	NA	NA	NA	NA	NA	NA	NA	NA	NA	NA	NA	NA	NA	NA	NA	NA	0.439517	1
CTNNA1	0.330532	3.81539e-63	0.675142	2.19971e-06	0.568031	0.0948555	NA	NA	NA	NA	NA	NA	NA	NA	NA	NA	NA	NA	NA	NA	NA	NA	NA	NA	-0.44112	0.0523268	-1.20596	1	NA	NA
CTNNB1	NA	NA	-0.285784	1	NA	NA	-0.297754	1	NA	NA	NA	NA	NA	NA	-0.255852	1	NA	NA	NA	NA	NA	NA	NA	NA	-0.278565	1	0.862263	1	NA	NA
CTNNBL1	NA	NA	NA	NA	NA	NA	NA	NA	NA	NA	NA	NA	NA	NA	NA	NA	NA	NA	NA	NA	NA	NA	NA	NA	-0.502489	0.0583757	NA	NA	NA	NA
CTNND1	NA	NA	NA	NA	NA	NA	NA	NA	NA	NA	NA	NA	NA	NA	NA	NA	NA	NA	NA	NA	NA	NA	NA	NA	-0.251424	1	NA	NA	NA	NA
CTPS1	NA	NA	NA	NA	NA	NA	NA	NA	NA	NA	NA	NA	NA	NA	-0.350547	1	NA	NA	NA	NA	NA	NA	NA	NA	NA	NA	1.60439	1	0.346601	1
CTR9	NA	NA	NA	NA	NA	NA	NA	NA	NA	NA	NA	NA	NA	NA	NA	NA	NA	NA	NA	NA	NA	NA	NA	NA	NA	NA	-1.06938	1	-0.311281	1
CTSA	0.447442	2.09639e-69	0.757532	7.52561e-12	1.17834	1.60519e-08	NA	NA	NA	NA	NA	NA	NA	NA	NA	NA	NA	NA	NA	NA	NA	NA	NA	NA	NA	NA	-1.40737	1	NA	NA
CTSC	0.422739	6.2732e-43	NA	NA	0.559778	1	NA	NA	NA	NA	NA	NA	NA	NA	NA	NA	NA	NA	NA	NA	NA	NA	NA	NA	-0.367555	0.0522154	NA	NA	NA	NA
CTSF	NA	NA	NA	NA	NA	NA	NA	NA	NA	NA	NA	NA	NA	NA	NA	NA	NA	NA	NA	NA	NA	NA	NA	NA	-0.25783	0.241432	NA	NA	NA	NA
CTSS	-0.357504	1.44436e-09	0.387037	0.33649	1.2931	2.87113e-05	NA	NA	NA	NA	NA	NA	NA	NA	-0.33129	1	NA	NA	NA	NA	NA	NA	0.26881	1	-0.305661	0.00315383	0.473983	1	-0.32295	1
CTSW	NA	NA	NA	NA	-0.493398	1	NA	NA	NA	NA	-0.398186	2.66957e-37	NA	NA	NA	NA	NA	NA	NA	NA	NA	NA	-0.41269	1	NA	NA	-0.460674	1	-1.10195	0.000126785
CTTN	NA	NA	NA	NA	NA	NA	NA	NA	NA	NA	NA	NA	NA	NA	NA	NA	NA	NA	NA	NA	NA	NA	NA	NA	NA	NA	-2.63252	1	NA	NA
CUEDC2	NA	NA	NA	NA	NA	NA	NA	NA	NA	NA	NA	NA	NA	NA	NA	NA	NA	NA	NA	NA	NA	NA	NA	NA	-0.514844	0.000491592	NA	NA	NA	NA
CUL5	NA	NA	NA	NA	0.262484	1	NA	NA	NA	NA	NA	NA	NA	NA	-0.259929	1	NA	NA	NA	NA	NA	NA	NA	NA	NA	NA	1.11452	1	NA	NA
CUTA	NA	NA	NA	NA	-0.250953	1	NA	NA	NA	NA	NA	NA	NA	NA	NA	NA	NA	NA	NA	NA	NA	NA	NA	NA	NA	NA	0.61556	1	-0.40649	0.0143097
CUX1	0.364447	1.46684e-50	NA	NA	0.35788	1	NA	NA	NA	NA	NA	NA	NA	NA	NA	NA	NA	NA	NA	NA	NA	NA	NA	NA	-0.425779	0.483579	NA	NA	NA	NA
CWC25	NA	NA	NA	NA	NA	NA	-0.316382	1	NA	NA	NA	NA	NA	NA	NA	NA	NA	NA	NA	NA	NA	NA	NA	NA	NA	NA	2.82089	1	0.438395	1
CWF19L2	NA	NA	NA	NA	NA	NA	NA	NA	NA	NA	NA	NA	NA	NA	NA	NA	NA	NA	NA	NA	NA	NA	NA	NA	0.27922	1	2.96077	1	1.45887	1.48801e-11
CXCL1	-0.332275	6.41643e-15	0.50774	0.0011576	NA	NA	NA	NA	NA	NA	NA	NA	NA	NA	NA	NA	NA	NA	NA	NA	NA	NA	NA	NA	NA	NA	NA	NA	NA	NA
CXCL10	NA	NA	-0.548764	1	NA	NA	NA	NA	NA	NA	NA	NA	NA	NA	NA	NA	NA	NA	NA	NA	NA	NA	NA	NA	NA	NA	NA	NA	NA	NA
CXCL16	-1.03462	1.49425e-91	-0.794964	8.8636e-10	-0.84113	0.618923	NA	NA	NA	NA	NA	NA	NA	NA	NA	NA	NA	NA	NA	NA	NA	NA	NA	NA	NA	NA	NA	NA	NA	NA
CXCL2	-1.46908	3.78071e-69	-0.71274	1	-0.465968	1	-0.464245	1	NA	NA	NA	NA	NA	NA	NA	NA	NA	NA	NA	NA	NA	NA	NA	NA	-0.614014	1	NA	NA	NA	NA
CXCL3	-0.891721	1.04624e-17	-0.668427	1	NA	NA	NA	NA	NA	NA	NA	NA	NA	NA	NA	NA	NA	NA	NA	NA	NA	NA	NA	NA	NA	NA	NA	NA	NA	NA
CXCL5	NA	NA	NA	NA	NA	NA	NA	NA	NA	NA	NA	NA	NA	NA	NA	NA	NA	NA	NA	NA	NA	NA	NA	NA	NA	NA	-0.643222	1	NA	NA
CXCL8	-0.993904	1.78362e-43	NA	NA	-0.291997	1	-1.35886	1	NA	NA	NA	NA	NA	NA	-0.63082	1	NA	NA	NA	NA	NA	NA	NA	NA	-1.51544	1.32389e-07	NA	NA	NA	NA
CXCR4	-0.445772	8.15739e-28	-1.34127	3.06536e-11	-1.57473	4.08791e-06	0.481781	1	NA	NA	-0.469416	3.08888e-99	-0.352903	1.4528e-24	-0.320989	1	-0.258855	2.41644e-06	NA	NA	-0.695702	1	-0.388797	1	0.835052	1	-2.33541	1	NA	NA
CXXC5	-0.353865	5.27019e-26	NA	NA	NA	NA	-0.924327	1	NA	NA	NA	NA	NA	NA	NA	NA	NA	NA	NA	NA	NA	NA	NA	NA	-0.871258	6.82929e-06	NA	NA	NA	NA
CYB5D1	-0.57185	1.64836e-39	-0.397367	1	-0.646421	1	-0.466097	1	NA	NA	NA	NA	NA	NA	NA	NA	NA	NA	NA	NA	NA	NA	NA	NA	NA	NA	NA	NA	NA	NA
CYB5R1	NA	NA	NA	NA	NA	NA	NA	NA	NA	NA	NA	NA	NA	NA	0.303367	1	NA	NA	NA	NA	NA	NA	NA	NA	NA	NA	-1.30432	1	NA	NA
CYB5R3	NA	NA	NA	NA	NA	NA	NA	NA	NA	NA	NA	NA	NA	NA	NA	NA	NA	NA	NA	NA	NA	NA	NA	NA	-0.28999	1	NA	NA	NA	NA
CYB5R4	NA	NA	NA	NA	NA	NA	NA	NA	NA	NA	NA	NA	NA	NA	NA	NA	NA	NA	NA	NA	NA	NA	NA	NA	-0.293192	1	-1.20194	1	NA	NA
CYBA	0.297769	8.84611e-15	0.590419	9.79581e-10	NA	NA	NA	NA	NA	NA	NA	NA	NA	NA	NA	NA	NA	NA	NA	NA	NA	NA	NA	NA	NA	NA	-0.920411	1	-0.553698	0.0152475
CYBC1	0.348298	3.17934e-78	NA	NA	NA	NA	NA	NA	NA	NA	NA	NA	NA	NA	NA	NA	NA	NA	NA	NA	NA	NA	NA	NA	NA	NA	-0.444738	1	0.325304	1
CYC1	NA	NA	NA	NA	0.277903	1	NA	NA	NA	NA	NA	NA	NA	NA	0.325957	1	NA	NA	NA	NA	0.256087	1	NA	NA	-0.293819	0.333335	1.05588	1	NA	NA
CYLD	NA	NA	-0.465479	0.00323753	-0.264709	1	NA	NA	NA	NA	NA	NA	NA	NA	-0.298496	1	NA	NA	NA	NA	NA	NA	NA	NA	NA	NA	NA	NA	0.515968	1
CYP2S1	NA	NA	NA	NA	-0.577246	1	NA	NA	NA	NA	NA	NA	NA	NA	NA	NA	NA	NA	NA	NA	NA	NA	NA	NA	NA	NA	NA	NA	NA	NA
CYP46A1	NA	NA	NA	NA	NA	NA	-0.300551	1	NA	NA	NA	NA	NA	NA	NA	NA	NA	NA	NA	NA	NA	NA	NA	NA	NA	NA	NA	NA	NA	NA
CYREN	NA	NA	NA	NA	NA	NA	NA	NA	NA	NA	NA	NA	NA	NA	NA	NA	NA	NA	NA	NA	NA	NA	NA	NA	NA	NA	-0.934204	1	NA	NA
CYSLTR1	NA	NA	-0.435862	0.0324468	NA	NA	0.321692	1	NA	NA	NA	NA	NA	NA	NA	NA	NA	NA	NA	NA	NA	NA	NA	NA	NA	NA	NA	NA	NA	NA
CYSLTR2	NA	NA	-0.315288	0.220607	NA	NA	NA	NA	NA	NA	NA	NA	NA	NA	NA	NA	NA	NA	NA	NA	NA	NA	NA	NA	NA	NA	NA	NA	NA	NA
CYTH2	NA	NA	NA	NA	NA	NA	NA	NA	NA	NA	NA	NA	NA	NA	NA	NA	NA	NA	NA	NA	NA	NA	NA	NA	NA	NA	-0.795612	1	NA	NA
CYTIP	0.577084	9.55047e-80	NA	NA	0.3912	1	0.32929	1	NA	NA	NA	NA	NA	NA	-0.253287	1	NA	NA	NA	NA	-0.280921	0.195907	NA	NA	1.26031	6.36286e-07	2.93079	1	0.417836	1
CYTL1	NA	NA	NA	NA	NA	NA	NA	NA	NA	NA	NA	NA	NA	NA	NA	NA	NA	NA	NA	NA	NA	NA	NA	NA	-0.769466	6.25388e-06	NA	NA	NA	NA
CYTOR	-1.48996	2.95017e-157	-0.831622	3.12203e-11	-1.05912	0.00286361	NA	NA	NA	NA	NA	NA	NA	NA	0.482561	2.27024e-05	NA	NA	NA	NA	NA	NA	NA	NA	-0.508263	0.118622	-1.25037	1	NA	NA
CZIB	NA	NA	NA	NA	0.366421	0.00236056	NA	NA	NA	NA	NA	NA	NA	NA	-0.278586	1	NA	NA	NA	NA	NA	NA	NA	NA	NA	NA	NA	NA	NA	NA
DAAM1	NA	NA	NA	NA	0.633067	1	NA	NA	NA	NA	NA	NA	NA	NA	NA	NA	NA	NA	NA	NA	NA	NA	NA	NA	-0.25144	1	-1.7799	1	NA	NA
DAB2	NA	NA	0.302738	0.000183265	NA	NA	NA	NA	NA	NA	NA	NA	NA	NA	NA	NA	NA	NA	NA	NA	NA	NA	NA	NA	NA	NA	-1.2551	1	NA	NA
DACH1	NA	NA	NA	NA	NA	NA	-0.388702	1	NA	NA	NA	NA	NA	NA	NA	NA	NA	NA	NA	NA	NA	NA	NA	NA	NA	NA	NA	NA	NA	NA
DAD1	NA	NA	0.471367	0.00887028	0.459762	1	NA	NA	NA	NA	NA	NA	NA	NA	NA	NA	NA	NA	NA	NA	NA	NA	NA	NA	-0.613147	0.0123053	NA	NA	NA	NA
DAP	NA	NA	NA	NA	0.527651	0.0150942	NA	NA	NA	NA	NA	NA	NA	NA	NA	NA	NA	NA	NA	NA	0.296294	0.4049	NA	NA	NA	NA	-1.79795	1	NA	NA
DAPK1	NA	NA	NA	NA	NA	NA	NA	NA	NA	NA	NA	NA	NA	NA	NA	NA	NA	NA	NA	NA	NA	NA	NA	NA	-0.548251	7.20541e-07	NA	NA	NA	NA
DAPP1	NA	NA	NA	NA	-0.755406	1	0.404582	1	NA	NA	NA	NA	NA	NA	NA	NA	NA	NA	NA	NA	NA	NA	NA	NA	NA	NA	-1.54121	1	NA	NA
DARS	-0.306592	8.66396e-32	NA	NA	NA	NA	NA	NA	NA	NA	NA	NA	NA	NA	0.352262	0.0913676	NA	NA	NA	NA	NA	NA	NA	NA	-0.600568	0.00369467	NA	NA	NA	NA
DARS1	0.360584	3.06645e-106	0.310415	5.47544e-06	0.327065	1	NA	NA	NA	NA	NA	NA	NA	NA	-0.382667	1	NA	NA	NA	NA	NA	NA	NA	NA	NA	NA	NA	NA	NA	NA
DAZAP1	NA	NA	NA	NA	0.311016	1	NA	NA	NA	NA	NA	NA	NA	NA	NA	NA	NA	NA	NA	NA	NA	NA	-0.27042	1	NA	NA	0.5779	1	NA	NA
DAZAP2	NA	NA	NA	NA	0.422309	1	NA	NA	NA	NA	NA	NA	NA	NA	NA	NA	NA	NA	NA	NA	NA	NA	NA	NA	NA	NA	-0.778417	1	NA	NA
DBI	0.619319	3.69189e-55	0.954991	1.81929e-18	0.418313	1	NA	NA	NA	NA	NA	NA	NA	NA	NA	NA	NA	NA	NA	NA	NA	NA	NA	NA	-0.256795	1	0.282882	1	NA	NA
DBN1	NA	NA	NA	NA	NA	NA	NA	NA	NA	NA	NA	NA	NA	NA	NA	NA	NA	NA	NA	NA	NA	NA	NA	NA	NA	NA	-1.84552	1	NA	NA
DBNL	0.267486	1.66756e-56	NA	NA	NA	NA	NA	NA	NA	NA	NA	NA	NA	NA	NA	NA	NA	NA	NA	NA	NA	NA	NA	NA	NA	NA	-2.20185	1	NA	NA
DCAF11	NA	NA	NA	NA	NA	NA	NA	NA	NA	NA	NA	NA	NA	NA	NA	NA	NA	NA	NA	NA	NA	NA	NA	NA	-0.290497	1	1.572	1	0.371753	1
DCAF7	NA	NA	NA	NA	NA	NA	NA	NA	NA	NA	NA	NA	NA	NA	NA	NA	NA	NA	NA	NA	NA	NA	NA	NA	-0.252612	1	NA	NA	NA	NA
DCP2	NA	NA	NA	NA	0.266621	1	0.512601	1	NA	NA	NA	NA	NA	NA	NA	NA	NA	NA	NA	NA	NA	NA	NA	NA	NA	NA	-1.28322	1	-0.270715	1
DCTN2	NA	NA	NA	NA	NA	NA	NA	NA	NA	NA	NA	NA	NA	NA	NA	NA	NA	NA	NA	NA	NA	NA	NA	NA	-0.508185	8.29385e-06	-1.73203	1	NA	NA
DCTN3	NA	NA	NA	NA	0.280688	1	-0.298422	1	NA	NA	NA	NA	NA	NA	NA	NA	NA	NA	NA	NA	NA	NA	NA	NA	NA	NA	0.946775	1	-0.432519	0.196395
DDAH2	NA	NA	0.306867	1	-0.491744	1	-0.360601	1	NA	NA	NA	NA	NA	NA	NA	NA	NA	NA	NA	NA	NA	NA	NA	NA	-0.944473	9.89537e-10	0.622453	1	NA	NA
DDB2	NA	NA	NA	NA	NA	NA	NA	NA	NA	NA	NA	NA	NA	NA	NA	NA	NA	NA	NA	NA	NA	NA	NA	NA	-0.338187	0.0355564	NA	NA	NA	NA
DDHD1	NA	NA	-0.270871	1	-0.434797	1	-0.353032	1	NA	NA	NA	NA	NA	NA	-0.338345	1	NA	NA	NA	NA	NA	NA	NA	NA	NA	NA	0.787238	1	NA	NA
DDIT4	-0.39356	2.91033e-52	NA	NA	-0.798854	1	NA	NA	-0.427667	8.83538e-93	-0.32923	3.92214e-32	-0.319219	1.82285e-09	-0.276373	1	-0.29762	1.15699e-10	0.271625	0.000153524	NA	NA	-0.258527	1	-0.30174	0.119564	NA	NA	NA	NA
DDOST	0.277492	4.64026e-62	NA	NA	0.380717	1	NA	NA	NA	NA	NA	NA	NA	NA	NA	NA	NA	NA	NA	NA	NA	NA	NA	NA	-0.299098	0.00332015	0.67259	1	NA	NA
DDT	-1.08764	1.09013e-101	-0.688918	7.06015e-08	-0.864301	0.0176292	-0.866558	0.00548471	NA	NA	NA	NA	NA	NA	0.779173	0.00220215	NA	NA	NA	NA	NA	NA	NA	NA	-0.64343	0.00927719	1.11452	1	NA	NA
DDX17	NA	NA	NA	NA	NA	NA	NA	NA	NA	NA	-0.269837	1.24374e-36	NA	NA	-0.833043	0.00124269	-0.337238	4.89198e-13	NA	NA	NA	NA	NA	NA	-0.782932	8.65392e-06	1.3007	1	0.649755	3.6201e-06
DDX18	NA	NA	NA	NA	0.441236	1	NA	NA	NA	NA	NA	NA	NA	NA	NA	NA	NA	NA	NA	NA	NA	NA	NA	NA	NA	NA	2.27547	1	0.887051	4.89715e-05
DDX21	NA	NA	0.338283	1	0.361932	1	NA	NA	0.506117	2.20428e-265	0.386333	1.30822e-60	0.268344	1.01291e-07	NA	NA	0.282664	2.12714e-11	NA	NA	NA	NA	0.504335	0.276475	0.579818	1	2.81176	1	1.17583	1.56566e-12
DDX24	NA	NA	NA	NA	-0.303017	1	-0.470815	1	NA	NA	NA	NA	NA	NA	-0.287431	1	NA	NA	NA	NA	NA	NA	NA	NA	0.708876	4.55469e-08	2.48288	1	0.899961	1.13058e-07
DDX39B	NA	NA	NA	NA	NA	NA	NA	NA	NA	NA	NA	NA	NA	NA	-0.348666	1	NA	NA	NA	NA	NA	NA	NA	NA	NA	NA	2.55047	1	0.517079	1
DDX3X	NA	NA	NA	NA	0.348167	1	NA	NA	NA	NA	NA	NA	-0.306217	5.27056e-06	-0.767093	0.000989415	NA	NA	NA	NA	NA	NA	NA	NA	NA	NA	-0.906701	1	NA	NA
DDX3Y	-1.28611	3.669e-118	-0.978973	2.65476e-18	-1.34232	4.11693e-09	-0.645027	0.467529	NA	NA	NA	NA	NA	NA	0.255987	0.398703	NA	NA	NA	NA	NA	NA	NA	NA	NA	NA	NA	NA	NA	NA
DDX5	NA	NA	-0.290356	1	NA	NA	-0.356512	1	NA	NA	-0.362695	6.34894e-128	-0.281343	7.15142e-20	-0.770149	3.21104e-13	-0.463547	9.33354e-64	NA	NA	NA	NA	NA	NA	-0.354206	1	2.21887	1	0.323185	1
DECR1	NA	NA	NA	NA	NA	NA	-0.275725	1	NA	NA	NA	NA	NA	NA	NA	NA	NA	NA	NA	NA	NA	NA	NA	NA	NA	NA	NA	NA	NA	NA
DEK	0.536262	4.58325e-38	0.405399	1	0.792321	0.0160447	NA	NA	NA	NA	NA	NA	NA	NA	NA	NA	NA	NA	NA	NA	-0.286642	1	0.387595	0.144799	-0.442429	0.000284228	-1.65474	1	0.283785	1
DENND1B	NA	NA	NA	NA	-0.494769	1	NA	NA	NA	NA	NA	NA	NA	NA	NA	NA	NA	NA	NA	NA	NA	NA	NA	NA	NA	NA	0.787238	1	NA	NA
DENND2D	NA	NA	NA	NA	NA	NA	NA	NA	NA	NA	NA	NA	NA	NA	NA	NA	NA	NA	NA	NA	NA	NA	-0.274215	1	NA	NA	NA	NA	NA	NA
DENND3	NA	NA	NA	NA	NA	NA	NA	NA	NA	NA	NA	NA	NA	NA	NA	NA	NA	NA	NA	NA	NA	NA	NA	NA	-0.270199	1	NA	NA	NA	NA
DENND5A	-0.491567	1.32319e-56	NA	NA	0.364488	1	NA	NA	NA	NA	NA	NA	NA	NA	NA	NA	NA	NA	NA	NA	NA	NA	NA	NA	-0.294398	1	1.05588	1	NA	NA
DENND6B	NA	NA	NA	NA	NA	NA	NA	NA	NA	NA	NA	NA	NA	NA	NA	NA	NA	NA	NA	NA	NA	NA	NA	NA	NA	NA	-0.754005	1	NA	NA
DEPTOR	NA	NA	NA	NA	NA	NA	NA	NA	NA	NA	NA	NA	NA	NA	NA	NA	NA	NA	NA	NA	NA	NA	NA	NA	-0.254844	1	NA	NA	NA	NA
DERA	NA	NA	NA	NA	NA	NA	NA	NA	NA	NA	NA	NA	NA	NA	NA	NA	NA	NA	NA	NA	NA	NA	NA	NA	-0.279818	1	-1.07407	1	NA	NA
DERL3	NA	NA	NA	NA	NA	NA	-0.454008	1	NA	NA	NA	NA	NA	NA	0.478581	0.979341	NA	NA	NA	NA	NA	NA	NA	NA	NA	NA	NA	NA	NA	NA
DGKD	NA	NA	NA	NA	-0.29643	1	-0.322349	1	NA	NA	NA	NA	NA	NA	NA	NA	NA	NA	NA	NA	NA	NA	NA	NA	NA	NA	-1.3965	1	0.460476	1
DGKE	NA	NA	NA	NA	NA	NA	NA	NA	NA	NA	NA	NA	NA	NA	NA	NA	NA	NA	NA	NA	NA	NA	NA	NA	-0.344682	1	NA	NA	NA	NA
DGKZ	NA	NA	NA	NA	0.270148	1	-0.500984	1	NA	NA	NA	NA	NA	NA	NA	NA	NA	NA	NA	NA	NA	NA	NA	NA	-0.392263	0.0141799	NA	NA	-0.326073	1
DGUOK	NA	NA	NA	NA	NA	NA	NA	NA	NA	NA	NA	NA	NA	NA	NA	NA	-0.252367	3.02205e-14	NA	NA	NA	NA	NA	NA	NA	NA	1.99634	1	NA	NA
DHPS	NA	NA	NA	NA	-0.330776	1	NA	NA	NA	NA	NA	NA	NA	NA	NA	NA	NA	NA	NA	NA	NA	NA	NA	NA	NA	NA	-0.847361	1	NA	NA
DHRS3	NA	NA	NA	NA	NA	NA	NA	NA	NA	NA	NA	NA	NA	NA	NA	NA	NA	NA	NA	NA	NA	NA	NA	NA	NA	NA	-0.850661	1	NA	NA
DHRS4	NA	NA	NA	NA	NA	NA	NA	NA	NA	NA	NA	NA	NA	NA	NA	NA	NA	NA	NA	NA	NA	NA	NA	NA	-0.254747	0.402548	NA	NA	NA	NA
DHRS7	NA	NA	NA	NA	NA	NA	0.326666	1	NA	NA	NA	NA	NA	NA	NA	NA	NA	NA	NA	NA	NA	NA	NA	NA	-0.331248	7.37628e-05	-1.05902	1	NA	NA
DHX36	0.318851	1.35846e-64	NA	NA	NA	NA	NA	NA	NA	NA	NA	NA	NA	NA	-0.291078	1	NA	NA	NA	NA	NA	NA	NA	NA	NA	NA	2.21085	1	0.789028	8.66737e-05
DICER1	0.568432	8.48097e-89	0.827588	4.25562e-12	0.859558	7.17877e-05	NA	NA	NA	NA	NA	NA	NA	NA	NA	NA	NA	NA	NA	NA	NA	NA	NA	NA	-0.460478	0.00115583	1.12291	1	0.469789	1
DIRC2	NA	NA	-0.398789	1.50337e-06	NA	NA	NA	NA	NA	NA	NA	NA	NA	NA	NA	NA	NA	NA	NA	NA	NA	NA	NA	NA	NA	NA	NA	NA	NA	NA
DLD	NA	NA	NA	NA	NA	NA	NA	NA	NA	NA	NA	NA	NA	NA	NA	NA	NA	NA	NA	NA	NA	NA	NA	NA	-0.262737	1	NA	NA	NA	NA
DLEU2	-0.274523	7.33434e-29	-0.286135	0.00043134	NA	NA	NA	NA	NA	NA	NA	NA	NA	NA	NA	NA	NA	NA	NA	NA	NA	NA	NA	NA	NA	NA	NA	NA	NA	NA
DMAC1	NA	NA	NA	NA	NA	NA	NA	NA	NA	NA	NA	NA	NA	NA	NA	NA	NA	NA	NA	NA	NA	NA	NA	NA	-0.257686	0.306922	NA	NA	NA	NA
DMAC2L	NA	NA	NA	NA	NA	NA	NA	NA	NA	NA	NA	NA	NA	NA	-0.256696	1	NA	NA	NA	NA	NA	NA	NA	NA	NA	NA	NA	NA	NA	NA
DMTN	NA	NA	NA	NA	NA	NA	NA	NA	NA	NA	NA	NA	NA	NA	NA	NA	NA	NA	NA	NA	NA	NA	NA	NA	NA	NA	-0.724368	1	NA	NA
DNAAF1	-1.15303	9.22817e-61	-0.949042	0.00121458	NA	NA	NA	NA	NA	NA	NA	NA	NA	NA	NA	NA	NA	NA	NA	NA	0.582505	1	NA	NA	NA	NA	NA	NA	NA	NA
DNAJA1	NA	NA	-0.514481	0.11875	NA	NA	NA	NA	NA	NA	NA	NA	NA	NA	NA	NA	NA	NA	NA	NA	NA	NA	NA	NA	0.514181	1	0.920202	1	NA	NA
DNAJA2	0.29621	1.88999e-80	NA	NA	NA	NA	NA	NA	NA	NA	NA	NA	NA	NA	NA	NA	NA	NA	NA	NA	NA	NA	NA	NA	NA	NA	-1.32873	1	NA	NA
DNAJB14	NA	NA	NA	NA	NA	NA	0.284996	1	NA	NA	NA	NA	NA	NA	NA	NA	NA	NA	NA	NA	NA	NA	NA	NA	NA	NA	NA	NA	0.289933	0.0049901
DNAJB6	NA	NA	NA	NA	NA	NA	-0.266527	1	NA	NA	-0.380969	1.78241e-52	-0.384669	3.2725e-21	NA	NA	-0.414421	1.26901e-31	NA	NA	NA	NA	NA	NA	-0.47314	1	0.679302	1	NA	NA
DNAJC1	NA	NA	NA	NA	NA	NA	NA	NA	NA	NA	NA	NA	NA	NA	NA	NA	NA	NA	NA	NA	NA	NA	NA	NA	-0.760029	3.68309e-08	NA	NA	NA	NA
DNAJC15	NA	NA	NA	NA	NA	NA	NA	NA	NA	NA	NA	NA	NA	NA	NA	NA	NA	NA	NA	NA	NA	NA	NA	NA	NA	NA	-1.5596	1	NA	NA
DNAJC16	NA	NA	NA	NA	NA	NA	NA	NA	NA	NA	NA	NA	NA	NA	NA	NA	NA	NA	NA	NA	NA	NA	NA	NA	NA	NA	-1.77551	1	NA	NA
DNAJC21	NA	NA	NA	NA	NA	NA	-0.320687	1	NA	NA	NA	NA	NA	NA	NA	NA	NA	NA	NA	NA	NA	NA	NA	NA	NA	NA	NA	NA	NA	NA
DNAJC3	0.354028	1.82149e-68	NA	NA	0.584136	1	0.366844	1	NA	NA	NA	NA	NA	NA	NA	NA	NA	NA	NA	NA	0.265863	1	NA	NA	NA	NA	-1.14674	1	NA	NA
DNAJC4	-0.309757	9.97806e-29	NA	NA	-0.445437	1	NA	NA	NA	NA	NA	NA	NA	NA	NA	NA	NA	NA	NA	NA	NA	NA	NA	NA	-0.648167	8.81636e-07	-0.64771	1	NA	NA
DNAJC7	0.337148	1.1461e-60	0.252688	1	0.355309	1	-0.58812	1	NA	NA	NA	NA	NA	NA	-0.280247	1	NA	NA	NA	NA	NA	NA	NA	NA	-0.306838	1	0.568521	1	NA	NA
DNAJC8	0.297666	1.05765e-55	0.552713	0.00136277	0.470792	1	NA	NA	NA	NA	NA	NA	NA	NA	NA	NA	NA	NA	NA	NA	NA	NA	NA	NA	NA	NA	-1.89714	1	NA	NA
DNASE1L3	NA	NA	NA	NA	-0.33356	1	-0.299461	1	NA	NA	NA	NA	NA	NA	NA	NA	NA	NA	NA	NA	NA	NA	NA	NA	NA	NA	NA	NA	NA	NA
DNM1L	NA	NA	NA	NA	0.257792	0.453712	NA	NA	NA	NA	NA	NA	NA	NA	NA	NA	NA	NA	NA	NA	NA	NA	NA	NA	NA	NA	-1.4817	1	0.252358	1
DNM3	NA	NA	NA	NA	NA	NA	NA	NA	NA	NA	NA	NA	NA	NA	NA	NA	NA	NA	NA	NA	NA	NA	NA	NA	NA	NA	-1.04102	1	NA	NA
DNTTIP2	NA	NA	NA	NA	-0.274206	1	NA	NA	NA	NA	NA	NA	NA	NA	NA	NA	NA	NA	NA	NA	NA	NA	NA	NA	-0.271339	1	2.04203	1	NA	NA
DOK2	NA	NA	NA	NA	NA	NA	NA	NA	NA	NA	NA	NA	NA	NA	NA	NA	NA	NA	NA	NA	NA	NA	NA	NA	NA	NA	-1.55798	1	-0.331601	1
DOK3	0.34204	9.32141e-94	NA	NA	0.408842	0.000420194	NA	NA	NA	NA	NA	NA	NA	NA	NA	NA	NA	NA	NA	NA	NA	NA	NA	NA	NA	NA	-0.709086	1	NA	NA
DPEP2	-0.25323	1.69709e-10	-0.504567	0.00451773	NA	NA	NA	NA	NA	NA	NA	NA	NA	NA	NA	NA	NA	NA	NA	NA	NA	NA	NA	NA	NA	NA	NA	NA	NA	NA
DPF1	NA	NA	NA	NA	NA	NA	NA	NA	NA	NA	NA	NA	NA	NA	NA	NA	NA	NA	NA	NA	NA	NA	NA	NA	-0.279528	1	NA	NA	NA	NA
DPM2	NA	NA	NA	NA	NA	NA	NA	NA	NA	NA	NA	NA	NA	NA	NA	NA	NA	NA	NA	NA	NA	NA	NA	NA	NA	NA	-0.837506	1	NA	NA
DPM3	NA	NA	NA	NA	0.333479	1	NA	NA	NA	NA	NA	NA	NA	NA	NA	NA	NA	NA	NA	NA	NA	NA	NA	NA	-0.279387	1	NA	NA	NA	NA
DPP7	NA	NA	NA	NA	NA	NA	NA	NA	NA	NA	NA	NA	NA	NA	NA	NA	NA	NA	NA	NA	NA	NA	NA	NA	NA	NA	-0.531417	1	NA	NA
DPPA4	NA	NA	NA	NA	NA	NA	NA	NA	NA	NA	NA	NA	NA	NA	NA	NA	NA	NA	NA	NA	NA	NA	NA	NA	-0.254326	1	NA	NA	NA	NA
DR1	NA	NA	NA	NA	NA	NA	NA	NA	NA	NA	NA	NA	NA	NA	-0.26838	1	NA	NA	NA	NA	NA	NA	NA	NA	0.553754	0.293082	-0.975948	1	NA	NA
DRAM1	NA	NA	0.745408	3.45787e-07	0.558776	1	NA	NA	NA	NA	NA	NA	NA	NA	NA	NA	NA	NA	NA	NA	NA	NA	NA	NA	-0.318078	1	NA	NA	NA	NA
DRAP1	NA	NA	-0.466766	0.014512	-0.490845	1	NA	NA	NA	NA	NA	NA	0.252196	1.45818e-13	NA	NA	NA	NA	NA	NA	NA	NA	NA	NA	NA	NA	0.553728	1	NA	NA
DSE	-0.266987	4.27305e-20	NA	NA	0.4684	1	NA	NA	NA	NA	NA	NA	NA	NA	NA	NA	NA	NA	NA	NA	NA	NA	NA	NA	-0.382308	0.106117	-0.606974	1	NA	NA
DST	NA	NA	NA	NA	NA	NA	NA	NA	NA	NA	NA	NA	NA	NA	NA	NA	NA	NA	NA	NA	NA	NA	NA	NA	-0.619705	0.164438	NA	NA	NA	NA
DSTN	0.35909	1.97809e-59	NA	NA	NA	NA	-0.493701	1	NA	NA	NA	NA	NA	NA	NA	NA	NA	NA	NA	NA	0.297627	1	NA	NA	NA	NA	-1.77365	1	-0.274554	1
DTD1	NA	NA	NA	NA	NA	NA	NA	NA	NA	NA	NA	NA	NA	NA	NA	NA	NA	NA	NA	NA	NA	NA	NA	NA	-0.485288	0.0161217	0.907524	1	NA	NA
DUSP1	-0.392146	6.18783e-13	NA	NA	-0.50281	1	0.762869	1	0.563252	4.67986e-132	NA	NA	NA	NA	NA	NA	-0.278743	0.0471865	0.504137	1.35275e-15	NA	NA	NA	NA	0.256421	1	NA	NA	NA	NA
DUSP2	-1.61084	1.33772e-110	-1.40814	1.446e-07	-1.25249	0.385284	NA	NA	-0.307891	8.70103e-62	-0.412663	1.30778e-49	NA	NA	-0.585418	0.998116	-0.378163	7.78258e-35	0.277159	1	-0.447132	1	NA	NA	0.288401	1	1.31082	1	-0.681799	0.0153482
DUSP22	NA	NA	NA	NA	NA	NA	NA	NA	NA	NA	NA	NA	NA	NA	NA	NA	NA	NA	NA	NA	NA	NA	NA	NA	NA	NA	-0.347174	1	NA	NA
DUSP4	NA	NA	NA	NA	-1.17846	0.00269161	NA	NA	NA	NA	NA	NA	NA	NA	NA	NA	NA	NA	-0.357186	0.00481044	NA	NA	NA	NA	NA	NA	NA	NA	NA	NA
DUSP5	-0.516945	4.32599e-33	NA	NA	-0.294767	1	NA	NA	NA	NA	NA	NA	NA	NA	-0.326378	1	NA	NA	NA	NA	NA	NA	NA	NA	NA	NA	NA	NA	NA	NA
DUSP6	NA	NA	1.19266	2.55119e-13	1.42718	3.3196e-07	NA	NA	NA	NA	NA	NA	NA	NA	NA	NA	NA	NA	NA	NA	NA	NA	NA	NA	-0.522942	1	NA	NA	NA	NA
DUT	NA	NA	NA	NA	NA	NA	NA	NA	NA	NA	NA	NA	NA	NA	NA	NA	NA	NA	NA	NA	NA	NA	0.426282	0.241209	-0.436685	0.0381724	1.28118	1	NA	NA
DYNC1H1	0.331891	2.78089e-58	NA	NA	NA	NA	-0.285926	1	NA	NA	NA	NA	NA	NA	NA	NA	NA	NA	NA	NA	NA	NA	0.345314	1	-0.352306	0.88062	NA	NA	0.744636	1
DYNC1LI2	NA	NA	NA	NA	NA	NA	-0.40906	1	NA	NA	NA	NA	NA	NA	NA	NA	NA	NA	NA	NA	NA	NA	NA	NA	NA	NA	NA	NA	0.386137	1
DYNLL1	NA	NA	0.386006	0.370339	NA	NA	NA	NA	NA	NA	NA	NA	-0.270525	3.83321e-06	NA	NA	NA	NA	NA	NA	NA	NA	NA	NA	NA	NA	-2.95921	1	NA	NA
DYNLRB1	NA	NA	NA	NA	NA	NA	NA	NA	NA	NA	NA	NA	NA	NA	NA	NA	NA	NA	NA	NA	NA	NA	NA	NA	-0.345144	0.000552593	-2.15005	1	NA	NA
DYNLT1	NA	NA	NA	NA	NA	NA	-0.359959	1	NA	NA	NA	NA	NA	NA	-0.483265	1	-0.263792	1.11723e-11	NA	NA	-0.262748	1	NA	NA	-0.403896	0.0398368	NA	NA	NA	NA
DYRK2	NA	NA	NA	NA	NA	NA	-0.393129	1	NA	NA	NA	NA	NA	NA	NA	NA	NA	NA	NA	NA	NA	NA	NA	NA	NA	NA	1.11452	1	NA	NA
E2F3	NA	NA	NA	NA	0.388823	1	NA	NA	NA	NA	NA	NA	NA	NA	NA	NA	NA	NA	NA	NA	NA	NA	NA	NA	-0.420068	0.587747	NA	NA	NA	NA
EAF2	NA	NA	NA	NA	NA	NA	NA	NA	NA	NA	NA	NA	NA	NA	NA	NA	NA	NA	NA	NA	NA	NA	NA	NA	-0.413613	0.0548186	NA	NA	NA	NA
EBLN3P	NA	NA	NA	NA	NA	NA	-0.307679	1	NA	NA	NA	NA	NA	NA	NA	NA	NA	NA	NA	NA	NA	NA	NA	NA	-0.28864	1	NA	NA	NA	NA
EBNA1BP2	NA	NA	NA	NA	NA	NA	NA	NA	NA	NA	NA	NA	NA	NA	NA	NA	NA	NA	NA	NA	NA	NA	NA	NA	-0.348211	0.42946	NA	NA	NA	NA
EBPL	NA	NA	NA	NA	NA	NA	0.287918	1	NA	NA	NA	NA	NA	NA	NA	NA	NA	NA	NA	NA	NA	NA	NA	NA	-1.11895	2.95263e-09	NA	NA	NA	NA
ECH1	NA	NA	NA	NA	0.4096	1	NA	NA	NA	NA	NA	NA	NA	NA	NA	NA	NA	NA	NA	NA	NA	NA	NA	NA	-0.429953	0.0385311	NA	NA	NA	NA
ECHS1	NA	NA	NA	NA	0.277041	1	NA	NA	NA	NA	NA	NA	NA	NA	NA	NA	NA	NA	NA	NA	NA	NA	NA	NA	-0.308419	0.174643	NA	NA	NA	NA
ECI2	NA	NA	NA	NA	NA	NA	NA	NA	NA	NA	NA	NA	NA	NA	NA	NA	NA	NA	NA	NA	NA	NA	NA	NA	-0.280177	1	NA	NA	NA	NA
EDEM1	NA	NA	NA	NA	-0.411356	1	NA	NA	NA	NA	NA	NA	NA	NA	NA	NA	NA	NA	NA	NA	0.416042	1	NA	NA	NA	NA	NA	NA	NA	NA
EDF1	NA	NA	NA	NA	-0.377779	1	NA	NA	NA	NA	NA	NA	NA	NA	NA	NA	NA	NA	NA	NA	NA	NA	NA	NA	NA	NA	-0.774914	1	NA	NA
EEF1A1	-0.430875	6.03869e-36	-0.978355	1.26776e-39	-0.63902	2.20355e-07	NA	NA	-0.287126	0	NA	NA	NA	NA	NA	NA	NA	NA	NA	NA	-0.582501	7.3809e-14	-0.346745	0.000344075	NA	NA	0.901366	1	-0.673791	0.00538986
EEF1B2	NA	NA	-0.603227	1.51671e-07	-0.775919	1	NA	NA	NA	NA	NA	NA	NA	NA	NA	NA	NA	NA	NA	NA	-0.256542	1	NA	NA	0.262219	1	1.46307	1	-0.956371	2.29753e-06
EEF1D	-0.646138	4.25124e-98	-0.6529	1.07783e-10	-0.704944	0.000885886	NA	NA	NA	NA	NA	NA	NA	NA	NA	NA	NA	NA	NA	NA	NA	NA	NA	NA	0.57853	0.000795407	2.04209	1	-0.410723	0.55596
EEF2	-0.417082	4.3261e-59	-0.568658	1.66058e-07	-0.41615	1	NA	NA	NA	NA	NA	NA	NA	NA	NA	NA	NA	NA	NA	NA	NA	NA	NA	NA	-0.365243	0.511722	-0.294996	1	-0.596121	0.160529
EFCAB14	NA	NA	NA	NA	0.333203	0.0466728	NA	NA	NA	NA	NA	NA	NA	NA	-0.429508	1	NA	NA	NA	NA	NA	NA	NA	NA	NA	NA	-0.923593	1	NA	NA
EFHD2	NA	NA	0.831731	1.46981e-23	0.256765	1	NA	NA	NA	NA	NA	NA	NA	NA	NA	NA	NA	NA	NA	NA	NA	NA	NA	NA	NA	NA	-1.21604	1	-0.721107	0.250768
EFR3A	NA	NA	NA	NA	0.27164	1	NA	NA	NA	NA	NA	NA	NA	NA	-0.266129	1	NA	NA	NA	NA	NA	NA	NA	NA	NA	NA	0.613553	1	NA	NA
EGFL7	NA	NA	NA	NA	NA	NA	NA	NA	NA	NA	NA	NA	NA	NA	NA	NA	NA	NA	NA	NA	NA	NA	NA	NA	-1.08602	1.83095e-09	-1.01068	1	NA	NA
EGLN3	NA	NA	NA	NA	NA	NA	-0.350414	1	NA	NA	NA	NA	NA	NA	NA	NA	NA	NA	NA	NA	NA	NA	NA	NA	NA	NA	NA	NA	NA	NA
EGR1	-0.369461	2.31513e-12	-0.727939	1	-0.441405	1	NA	NA	NA	NA	NA	NA	NA	NA	NA	NA	NA	NA	NA	NA	NA	NA	NA	NA	-1.21351	0.020659	NA	NA	-0.439748	1
EGR3	-0.469426	4.8365e-17	-0.501766	1	-0.349498	1	NA	NA	NA	NA	NA	NA	NA	NA	NA	NA	NA	NA	NA	NA	NA	NA	NA	NA	-0.524013	0.248454	NA	NA	NA	NA
EHD1	-1.13493	1.07109e-120	NA	NA	0.443733	0.222697	-0.565341	1	NA	NA	NA	NA	NA	NA	NA	NA	NA	NA	NA	NA	NA	NA	NA	NA	NA	NA	-1.32215	1	-0.635047	1
EHD3	NA	NA	NA	NA	NA	NA	NA	NA	NA	NA	NA	NA	NA	NA	NA	NA	NA	NA	NA	NA	NA	NA	NA	NA	NA	NA	-1.09556	1	NA	NA
EID1	NA	NA	NA	NA	NA	NA	NA	NA	NA	NA	NA	NA	NA	NA	NA	NA	NA	NA	NA	NA	NA	NA	NA	NA	-0.71523	0.000212814	-1.33658	1	NA	NA
EIF1	-0.540609	8.75861e-104	-0.587668	3.61089e-17	-0.308392	1	NA	NA	NA	NA	NA	NA	NA	NA	NA	NA	-0.266643	1.82496e-52	NA	NA	-0.269364	1	NA	NA	0.307533	1	-1.02382	1	-0.362309	0.668544
EIF1AX	0.559403	2.37748e-66	0.519768	0.00459616	0.58865	1	NA	NA	NA	NA	NA	NA	NA	NA	-0.45268	1	-0.274462	1.7e-12	NA	NA	0.362752	1	NA	NA	NA	NA	-1.91283	1	NA	NA
EIF1AY	-0.491814	5.47535e-30	-0.655503	1.24532e-10	-0.421456	0.182729	NA	NA	NA	NA	NA	NA	NA	NA	0.47081	0.0871021	NA	NA	NA	NA	NA	NA	NA	NA	-0.262303	0.583825	1.61901	1	NA	NA
EIF1B	-0.307741	8.46335e-41	NA	NA	0.383414	1	NA	NA	NA	NA	NA	NA	NA	NA	NA	NA	NA	NA	NA	NA	NA	NA	NA	NA	NA	NA	-1.29189	1	NA	NA
EIF2A	NA	NA	-0.307566	0.591975	NA	NA	0.303408	1	NA	NA	NA	NA	NA	NA	NA	NA	NA	NA	NA	NA	NA	NA	NA	NA	NA	NA	NA	NA	0.411752	0.764155
EIF2AK1	NA	NA	NA	NA	0.399185	1	NA	NA	NA	NA	NA	NA	NA	NA	NA	NA	NA	NA	NA	NA	NA	NA	NA	NA	NA	NA	-2.58764	1	NA	NA
EIF2AK2	-0.346659	1.24826e-38	-0.288594	1	NA	NA	NA	NA	NA	NA	NA	NA	NA	NA	NA	NA	NA	NA	NA	NA	NA	NA	NA	NA	-0.472169	0.917061	NA	NA	0.527394	1
EIF2AK4	NA	NA	NA	NA	-0.629558	1	-0.350234	1	NA	NA	NA	NA	NA	NA	NA	NA	NA	NA	NA	NA	NA	NA	NA	NA	NA	NA	NA	NA	NA	NA
EIF2S3	NA	NA	NA	NA	0.251772	1	NA	NA	NA	NA	NA	NA	NA	NA	-0.401392	1	NA	NA	NA	NA	NA	NA	NA	NA	NA	NA	0.622453	1	NA	NA
EIF3A	NA	NA	NA	NA	NA	NA	NA	NA	NA	NA	NA	NA	NA	NA	NA	NA	NA	NA	NA	NA	0.271146	1	NA	NA	-0.289497	1	2.20652	1	0.628307	0.000244403
EIF3D	NA	NA	NA	NA	NA	NA	NA	NA	NA	NA	NA	NA	NA	NA	NA	NA	NA	NA	NA	NA	NA	NA	-0.278271	1	NA	NA	NA	NA	NA	NA
EIF3E	-0.476987	9.97855e-69	-0.544543	2.26774e-05	-0.680487	0.0431318	NA	NA	NA	NA	NA	NA	NA	NA	NA	NA	NA	NA	NA	NA	NA	NA	NA	NA	-0.268777	1	-0.87761	1	-0.780026	3.43998e-05
EIF3F	-0.407239	1.25055e-69	-0.748031	1.17944e-10	-0.628222	1	NA	NA	NA	NA	NA	NA	NA	NA	NA	NA	NA	NA	NA	NA	-0.428645	2.94141e-06	-0.347715	0.00973578	NA	NA	-1.55491	1	-0.469028	0.000140407
EIF3G	-0.3883	1.09888e-71	NA	NA	-0.443164	1	NA	NA	NA	NA	NA	NA	NA	NA	NA	NA	NA	NA	NA	NA	NA	NA	NA	NA	NA	NA	0.993775	1	-0.686367	0.0141639
EIF3H	-0.300691	9.52995e-66	-0.407828	0.0741946	-0.410581	1	NA	NA	NA	NA	NA	NA	NA	NA	NA	NA	NA	NA	NA	NA	-0.41812	0.00256849	NA	NA	NA	NA	NA	NA	-0.441188	0.133392
EIF3K	-0.426602	3.44189e-55	-0.410342	0.0316194	-0.400143	1	NA	NA	NA	NA	NA	NA	NA	NA	NA	NA	NA	NA	NA	NA	NA	NA	NA	NA	NA	NA	0.506161	1	-0.982039	6.39789e-09
EIF3L	-0.328235	3.12911e-51	-0.442173	0.0134992	-0.521737	1	-0.427425	1	NA	NA	NA	NA	NA	NA	NA	NA	NA	NA	NA	NA	-0.391638	0.0044961	-0.380379	0.00391417	-0.493858	0.0015215	NA	NA	-0.50036	0.00324691
EIF3M	-0.385489	9.28131e-74	-0.262163	1	-0.405712	1	-0.398637	1	NA	NA	NA	NA	NA	NA	NA	NA	NA	NA	NA	NA	NA	NA	NA	NA	-0.311337	1	1.60439	1	NA	NA
EIF4A1	NA	NA	NA	NA	NA	NA	-0.323966	1	NA	NA	NA	NA	NA	NA	NA	NA	-0.262363	8.07069e-14	NA	NA	NA	NA	NA	NA	NA	NA	-0.803855	1	NA	NA
EIF4A2	NA	NA	-0.436878	0.0846334	NA	NA	0.258833	1	NA	NA	NA	NA	NA	NA	-0.409439	1	NA	NA	NA	NA	0.250968	1	NA	NA	0.34256	1	1.46713	1	0.514925	0.343888
EIF4A3	-0.326615	5.62326e-44	-0.431265	0.8434	-0.306293	1	NA	NA	NA	NA	NA	NA	NA	NA	NA	NA	NA	NA	NA	NA	NA	NA	NA	NA	0.480361	0.818283	NA	NA	NA	NA
EIF4B	NA	NA	NA	NA	-0.449717	1	NA	NA	NA	NA	NA	NA	NA	NA	NA	NA	NA	NA	NA	NA	NA	NA	NA	NA	NA	NA	0.746538	1	NA	NA
EIF4E	-0.913393	1.13661e-81	-0.694597	0.0135822	NA	NA	NA	NA	NA	NA	NA	NA	NA	NA	NA	NA	NA	NA	NA	NA	NA	NA	NA	NA	NA	NA	-2.14107	1	-0.302867	1
EIF4EBP1	NA	NA	NA	NA	NA	NA	NA	NA	NA	NA	NA	NA	NA	NA	NA	NA	NA	NA	NA	NA	NA	NA	NA	NA	-0.277108	1	NA	NA	NA	NA
EIF4G3	0.361176	1.15486e-80	NA	NA	0.508403	1	NA	NA	NA	NA	NA	NA	NA	NA	NA	NA	NA	NA	NA	NA	NA	NA	NA	NA	-0.34483	1	-2.16272	1	NA	NA
EIF4H	0.279888	8.72535e-48	NA	NA	0.414805	1	-0.279635	1	NA	NA	NA	NA	NA	NA	NA	NA	NA	NA	NA	NA	NA	NA	NA	NA	-0.267905	0.00162846	-1.65265	1	NA	NA
EIF5	NA	NA	NA	NA	NA	NA	NA	NA	NA	NA	NA	NA	-0.281189	9.98509e-15	-0.385188	1	-0.259695	4.26803e-14	NA	NA	NA	NA	NA	NA	0.511268	1	1.53159	1	NA	NA
EIF5A	0.261514	4.01073e-43	NA	NA	0.440511	1	NA	NA	NA	NA	NA	NA	NA	NA	0.471946	1	NA	NA	NA	NA	NA	NA	NA	NA	NA	NA	-0.818597	1	NA	NA
EIF5B	0.455257	2.06182e-56	NA	NA	0.637733	1	0.386283	1	NA	NA	NA	NA	NA	NA	NA	NA	NA	NA	NA	NA	NA	NA	0.264519	1	NA	NA	NA	NA	0.903083	0.000112424
ELF1	NA	NA	-0.671407	1.04966e-07	NA	NA	NA	NA	NA	NA	NA	NA	NA	NA	NA	NA	NA	NA	NA	NA	NA	NA	-0.272862	1	NA	NA	0.821658	1	NA	NA
ELF2	0.307336	8.72124e-76	NA	NA	NA	NA	-0.33913	1	NA	NA	NA	NA	NA	NA	NA	NA	NA	NA	NA	NA	NA	NA	NA	NA	NA	NA	NA	NA	NA	NA
ELL2	-0.671857	9.53253e-67	-0.367631	0.111499	NA	NA	-0.258206	1	NA	NA	NA	NA	NA	NA	NA	NA	NA	NA	NA	NA	0.433705	1	NA	NA	NA	NA	1.65469	1	NA	NA
ELMO1	NA	NA	NA	NA	-0.265594	1	NA	NA	NA	NA	NA	NA	NA	NA	NA	NA	NA	NA	NA	NA	NA	NA	NA	NA	-0.612078	0.00141375	0.622453	1	0.371365	1
ELMSAN1	NA	NA	NA	NA	-0.355507	1	NA	NA	NA	NA	NA	NA	NA	NA	NA	NA	NA	NA	NA	NA	NA	NA	NA	NA	NA	NA	NA	NA	NA	NA
ELOB	NA	NA	0.338034	0.349404	0.855425	2.80529e-08	NA	NA	NA	NA	NA	NA	NA	NA	NA	NA	NA	NA	NA	NA	0.261459	1	NA	NA	NA	NA	-0.989466	1	-0.283353	0.922623
ELOC	NA	NA	0.344265	0.504588	NA	NA	-0.282403	1	NA	NA	NA	NA	NA	NA	0.298405	1	NA	NA	NA	NA	NA	NA	NA	NA	NA	NA	0.276142	1	NA	NA
EMB	0.540889	2.32674e-67	0.421095	0.000142064	0.504449	1	NA	NA	NA	NA	NA	NA	NA	NA	-0.262047	1	NA	NA	NA	NA	NA	NA	NA	NA	NA	NA	1.14622	1	0.435033	1
EMC3	0.293959	2.04212e-73	NA	NA	NA	NA	NA	NA	NA	NA	NA	NA	NA	NA	NA	NA	NA	NA	NA	NA	NA	NA	NA	NA	NA	NA	-2.55255	1	NA	NA
EMC7	NA	NA	NA	NA	NA	NA	-0.269419	1	NA	NA	NA	NA	NA	NA	NA	NA	NA	NA	NA	NA	NA	NA	NA	NA	NA	NA	NA	NA	NA	NA
EMD	NA	NA	NA	NA	NA	NA	NA	NA	NA	NA	NA	NA	NA	NA	NA	NA	NA	NA	NA	NA	NA	NA	NA	NA	NA	NA	-1.00809	1	-0.331343	0.731355
EMID1	NA	NA	NA	NA	NA	NA	NA	NA	NA	NA	NA	NA	NA	NA	NA	NA	NA	NA	NA	NA	NA	NA	NA	NA	-0.485423	0.000538939	NA	NA	NA	NA
EML4	NA	NA	0.289271	0.0789933	NA	NA	NA	NA	NA	NA	NA	NA	NA	NA	NA	NA	0.294283	6.60413e-07	NA	NA	NA	NA	0.326079	1	0.36594	1	2.83077	1	0.855609	1.80636e-06
EMP1	0.678494	6.8758e-33	0.477934	1	1.10176	0.00505845	NA	NA	NA	NA	NA	NA	NA	NA	NA	NA	NA	NA	NA	NA	NA	NA	NA	NA	-0.369528	1	NA	NA	NA	NA
EMP3	NA	NA	0.492197	0.00504352	NA	NA	NA	NA	NA	NA	NA	NA	NA	NA	0.374914	1	NA	NA	NA	NA	NA	NA	NA	NA	-0.372573	1	-1.15313	1	-0.361011	1
ENC1	NA	NA	NA	NA	NA	NA	NA	NA	NA	NA	NA	NA	NA	NA	-0.491151	1	NA	NA	NA	NA	NA	NA	NA	NA	NA	NA	NA	NA	NA	NA
ENDOD1	NA	NA	NA	NA	NA	NA	NA	NA	NA	NA	NA	NA	NA	NA	NA	NA	NA	NA	NA	NA	NA	NA	NA	NA	NA	NA	-1.70849	1	NA	NA
ENHO	NA	NA	NA	NA	-0.956681	0.000939511	NA	NA	NA	NA	NA	NA	NA	NA	NA	NA	NA	NA	NA	NA	NA	NA	NA	NA	NA	NA	NA	NA	NA	NA
ENKUR	NA	NA	NA	NA	NA	NA	NA	NA	NA	NA	NA	NA	NA	NA	NA	NA	NA	NA	NA	NA	NA	NA	NA	NA	NA	NA	-1.95863	1	NA	NA
ENO1	0.684048	3.17065e-62	0.691796	1.73187e-11	1.26617	3.27685e-10	NA	NA	NA	NA	NA	NA	NA	NA	NA	NA	NA	NA	NA	NA	0.288504	1	NA	NA	-1.14114	5.71669e-09	-2.63052	1	NA	NA
ENSA	NA	NA	NA	NA	NA	NA	NA	NA	NA	NA	NA	NA	NA	NA	NA	NA	NA	NA	NA	NA	NA	NA	NA	NA	-0.3598	7.55964e-05	1.02064	1	NA	NA
ENY2	NA	NA	NA	NA	NA	NA	NA	NA	NA	NA	NA	NA	NA	NA	NA	NA	NA	NA	NA	NA	NA	NA	NA	NA	-0.30392	0.145001	1.00062	1	0.289855	1
EPB41	NA	NA	NA	NA	NA	NA	0.444075	1	NA	NA	NA	NA	NA	NA	-0.543615	0.472368	NA	NA	NA	NA	NA	NA	NA	NA	NA	NA	2.33681	1	0.486643	0.404265
EPB41L3	-0.290082	1.16961e-34	NA	NA	NA	NA	NA	NA	NA	NA	NA	NA	NA	NA	NA	NA	NA	NA	NA	NA	NA	NA	NA	NA	NA	NA	NA	NA	NA	NA
EPB41L4A-AS1	-0.393174	1.61421e-45	-0.415802	5.12435e-08	-0.262789	1	-0.348877	0.860548	NA	NA	NA	NA	NA	NA	0.740201	1.7506e-07	0.252227	3.67622e-11	NA	NA	NA	NA	NA	NA	-0.703118	0.00394754	NA	NA	NA	NA
EPN1	NA	NA	NA	NA	NA	NA	-0.379026	1	NA	NA	NA	NA	NA	NA	NA	NA	NA	NA	NA	NA	NA	NA	NA	NA	NA	NA	NA	NA	NA	NA
EPOR	NA	NA	NA	NA	NA	NA	NA	NA	NA	NA	NA	NA	NA	NA	NA	NA	NA	NA	NA	NA	NA	NA	NA	NA	NA	NA	-1.47138	1	NA	NA
EPRS	NA	NA	-0.315535	5.91702e-05	-0.350591	1	NA	NA	NA	NA	NA	NA	NA	NA	NA	NA	NA	NA	NA	NA	NA	NA	NA	NA	-0.454885	0.258504	NA	NA	NA	NA
EPRS1	0.331703	4.98793e-84	0.365147	1.73058e-06	0.586482	5.02537e-06	NA	NA	NA	NA	NA	NA	NA	NA	-0.389482	0.265607	NA	NA	NA	NA	0.283477	1	0.260335	1	NA	NA	1.95231	1	NA	NA
EPS15	NA	NA	NA	NA	NA	NA	NA	NA	NA	NA	NA	NA	NA	NA	NA	NA	NA	NA	NA	NA	NA	NA	NA	NA	NA	NA	-0.994706	1	NA	NA
EPS15L1	NA	NA	NA	NA	NA	NA	NA	NA	NA	NA	NA	NA	NA	NA	NA	NA	NA	NA	NA	NA	NA	NA	NA	NA	NA	NA	-1.02357	1	NA	NA
EPSTI1	NA	NA	NA	NA	NA	NA	NA	NA	NA	NA	NA	NA	NA	NA	NA	NA	NA	NA	NA	NA	NA	NA	NA	NA	-0.299005	1	NA	NA	0.288385	1
ERCC1	NA	NA	NA	NA	NA	NA	-0.374154	1	NA	NA	NA	NA	NA	NA	NA	NA	NA	NA	NA	NA	NA	NA	NA	NA	-0.399582	0.135023	0.829413	1	NA	NA
EREG	-1.8382	6.42969e-110	-1.31357	0.908346	0.448299	1	NA	NA	NA	NA	NA	NA	NA	NA	NA	NA	NA	NA	NA	NA	NA	NA	NA	NA	-0.629079	0.295575	NA	NA	NA	NA
ERG	NA	NA	NA	NA	NA	NA	NA	NA	NA	NA	NA	NA	NA	NA	NA	NA	NA	NA	NA	NA	NA	NA	NA	NA	-0.569873	0.00201365	NA	NA	NA	NA
ERGIC1	-0.265098	1.40814e-44	-0.26665	1	NA	NA	NA	NA	NA	NA	NA	NA	NA	NA	NA	NA	NA	NA	NA	NA	NA	NA	NA	NA	NA	NA	NA	NA	-0.265514	1
ERGIC2	NA	NA	NA	NA	NA	NA	NA	NA	NA	NA	NA	NA	NA	NA	-0.374623	1	NA	NA	NA	NA	NA	NA	NA	NA	NA	NA	NA	NA	NA	NA
ERGIC3	NA	NA	NA	NA	NA	NA	-0.320523	1	NA	NA	NA	NA	NA	NA	0.259674	1	NA	NA	NA	NA	0.273063	1	NA	NA	-0.353522	0.0251236	NA	NA	NA	NA
ERN1	-0.52252	4.26408e-41	-0.413727	0.212208	NA	NA	NA	NA	NA	NA	NA	NA	NA	NA	NA	NA	NA	NA	NA	NA	0.429899	1	NA	NA	NA	NA	NA	NA	NA	NA
ERO1B	NA	NA	NA	NA	NA	NA	NA	NA	NA	NA	NA	NA	NA	NA	-0.267049	1	NA	NA	NA	NA	NA	NA	NA	NA	NA	NA	1.80493	1	NA	NA
ERP29	-0.250941	1.21712e-55	-0.332976	1	-0.274653	1	NA	NA	NA	NA	NA	NA	NA	NA	NA	NA	NA	NA	NA	NA	NA	NA	NA	NA	NA	NA	NA	NA	-0.333449	1
ERV3-1	NA	NA	NA	NA	NA	NA	NA	NA	NA	NA	NA	NA	NA	NA	NA	NA	NA	NA	NA	NA	NA	NA	NA	NA	NA	NA	-1.33484	1	NA	NA
ESAM	NA	NA	NA	NA	NA	NA	NA	NA	NA	NA	NA	NA	NA	NA	NA	NA	NA	NA	NA	NA	NA	NA	NA	NA	NA	NA	-2.75277	1	NA	NA
ESCO1	NA	NA	NA	NA	NA	NA	NA	NA	NA	NA	NA	NA	NA	NA	-0.358816	1	NA	NA	NA	NA	NA	NA	NA	NA	NA	NA	0.757132	1	0.27619	1
ESD	NA	NA	NA	NA	NA	NA	NA	NA	NA	NA	NA	NA	NA	NA	NA	NA	NA	NA	NA	NA	NA	NA	-0.269692	1	-0.551071	0.00108331	NA	NA	NA	NA
ESF1	NA	NA	NA	NA	NA	NA	0.279753	1	NA	NA	NA	NA	NA	NA	NA	NA	NA	NA	NA	NA	NA	NA	NA	NA	0.275129	1	1.21965	1	1.1139	0.0102756
ETF1	NA	NA	NA	NA	-0.281343	1	-0.399169	1	NA	NA	NA	NA	NA	NA	NA	NA	NA	NA	NA	NA	NA	NA	NA	NA	NA	NA	0.457965	1	NA	NA
ETFA	NA	NA	NA	NA	NA	NA	NA	NA	NA	NA	NA	NA	NA	NA	NA	NA	NA	NA	NA	NA	NA	NA	NA	NA	NA	NA	-1.59222	1	NA	NA
ETFB	NA	NA	0.40446	0.0848431	0.50431	0.87535	NA	NA	NA	NA	NA	NA	NA	NA	NA	NA	NA	NA	NA	NA	NA	NA	NA	NA	-0.257905	1	NA	NA	NA	NA
ETS1	0.287634	7.80289e-35	NA	NA	-0.260049	1	0.252222	1	0.405195	6.09581e-148	0.34246	6.03555e-37	0.338091	6.91741e-05	NA	NA	0.485543	3.36755e-27	0.288194	0.00101985	NA	NA	0.445589	1	0.765381	0.200705	1.41111	1	0.715374	2.48072e-07
ETS2	-0.3785	3.09551e-30	0.288611	1	0.660812	1	NA	NA	NA	NA	NA	NA	NA	NA	NA	NA	NA	NA	NA	NA	NA	NA	NA	NA	-0.772091	0.00208327	NA	NA	NA	NA
ETV3	-0.396958	6.30659e-62	NA	NA	-0.874612	0.00237174	-0.481348	1	NA	NA	NA	NA	NA	NA	NA	NA	NA	NA	NA	NA	NA	NA	NA	NA	-0.456904	1	NA	NA	NA	NA
ETV6	0.283824	1.58498e-60	NA	NA	NA	NA	NA	NA	NA	NA	NA	NA	NA	NA	NA	NA	NA	NA	NA	NA	NA	NA	NA	NA	-0.731461	0.000172186	-0.732993	1	0.685778	1
EVA1B	NA	NA	NA	NA	NA	NA	NA	NA	NA	NA	NA	NA	NA	NA	NA	NA	NA	NA	NA	NA	NA	NA	NA	NA	-0.43975	0.0398746	-0.963866	1	NA	NA
EVI2B	-0.604386	4.31446e-63	-0.481636	0.00433503	0.290301	1	NA	NA	NA	NA	NA	NA	NA	NA	NA	NA	NA	NA	NA	NA	-0.281054	1	-0.318919	1	NA	NA	NA	NA	-0.29892	1
EVL	NA	NA	-0.567718	0.000202065	-0.6149	0.367733	0.468976	1	NA	NA	-0.277524	2.01758e-44	NA	NA	-0.384389	1	NA	NA	NA	NA	NA	NA	-0.398895	0.0535845	NA	NA	1.21965	1	0.617273	0.0198846
EWSR1	0.319167	3.49778e-44	0.328371	1	0.323762	1	NA	NA	NA	NA	NA	NA	NA	NA	NA	NA	NA	NA	NA	NA	NA	NA	NA	NA	-0.357587	1	0.621798	1	0.37992	1
EXOG	NA	NA	NA	NA	NA	NA	NA	NA	NA	NA	NA	NA	NA	NA	-0.27317	1	NA	NA	NA	NA	NA	NA	NA	NA	NA	NA	NA	NA	NA	NA
EZR	NA	NA	NA	NA	-1.37064	3.59484e-07	-0.435794	1	NA	NA	0.264756	4.1615e-13	NA	NA	0.514352	1	NA	NA	-0.285636	6.8049e-08	NA	NA	NA	NA	0.631632	1	1.95315	1	0.300493	1
F11R	NA	NA	NA	NA	NA	NA	NA	NA	NA	NA	NA	NA	NA	NA	NA	NA	NA	NA	NA	NA	NA	NA	NA	NA	-0.259219	0.798893	NA	NA	NA	NA
F13A1	NA	NA	NA	NA	0.495018	0.0545813	NA	NA	NA	NA	NA	NA	NA	NA	NA	NA	NA	NA	NA	NA	NA	NA	NA	NA	NA	NA	-1.44833	1	NA	NA
F2R	NA	NA	NA	NA	NA	NA	NA	NA	NA	NA	NA	NA	NA	NA	NA	NA	NA	NA	NA	NA	NA	NA	0.388852	1	-0.402761	0.639045	-1.04468	1	NA	NA
F3	-0.539523	1.02083e-16	NA	NA	NA	NA	NA	NA	NA	NA	NA	NA	NA	NA	NA	NA	NA	NA	NA	NA	NA	NA	NA	NA	NA	NA	NA	NA	NA	NA
F8A1	-0.269415	5.51142e-19	NA	NA	NA	NA	NA	NA	NA	NA	NA	NA	NA	NA	NA	NA	NA	NA	NA	NA	NA	NA	NA	NA	NA	NA	NA	NA	NA	NA
FAAP20	NA	NA	NA	NA	NA	NA	-0.32861	1	NA	NA	NA	NA	NA	NA	NA	NA	NA	NA	NA	NA	NA	NA	NA	NA	-0.415165	0.0746645	NA	NA	NA	NA
FABP5	0.362117	5.01473e-47	0.369114	0.00175627	0.624523	1	NA	NA	NA	NA	NA	NA	NA	NA	NA	NA	NA	NA	NA	NA	0.387621	1	NA	NA	-0.511003	0.0562114	NA	NA	NA	NA
FADS1	NA	NA	0.265825	1	0.409742	1	-0.674964	1	NA	NA	NA	NA	NA	NA	NA	NA	NA	NA	NA	NA	NA	NA	NA	NA	-0.667753	1.30215e-05	NA	NA	NA	NA
FAH	NA	NA	NA	NA	NA	NA	NA	NA	NA	NA	NA	NA	NA	NA	NA	NA	NA	NA	NA	NA	NA	NA	NA	NA	NA	NA	-1.43719	1	NA	NA
FAM102A	NA	NA	NA	NA	NA	NA	NA	NA	NA	NA	NA	NA	NA	NA	NA	NA	NA	NA	NA	NA	NA	NA	NA	NA	0.32086	1	NA	NA	0.669714	0.0414665
FAM102B	NA	NA	NA	NA	NA	NA	NA	NA	NA	NA	NA	NA	NA	NA	NA	NA	NA	NA	NA	NA	NA	NA	NA	NA	-0.347728	0.141262	NA	NA	NA	NA
FAM111A	NA	NA	NA	NA	NA	NA	NA	NA	NA	NA	NA	NA	NA	NA	-0.3327	1	NA	NA	NA	NA	NA	NA	NA	NA	-0.284135	0.0391757	0.622453	1	NA	NA
FAM117A	NA	NA	NA	NA	NA	NA	NA	NA	NA	NA	NA	NA	NA	NA	NA	NA	NA	NA	NA	NA	NA	NA	NA	NA	-0.96811	2.96379e-09	NA	NA	NA	NA
FAM117B	NA	NA	-0.364813	0.00716491	NA	NA	NA	NA	NA	NA	NA	NA	NA	NA	NA	NA	NA	NA	NA	NA	NA	NA	NA	NA	0.261235	1	NA	NA	NA	NA
FAM118A	NA	NA	NA	NA	-0.468482	1	-0.330033	1	NA	NA	NA	NA	NA	NA	NA	NA	NA	NA	NA	NA	NA	NA	-0.261855	1	NA	NA	NA	NA	NA	NA
FAM129A	-0.271843	7.39351e-32	-0.272307	0.00205998	-0.737896	0.0246498	NA	NA	NA	NA	NA	NA	NA	NA	NA	NA	0.332332	2.32597e-17	NA	NA	NA	NA	NA	NA	NA	NA	NA	NA	NA	NA
FAM129B	-0.502849	8.29815e-56	NA	NA	NA	NA	NA	NA	NA	NA	NA	NA	NA	NA	NA	NA	NA	NA	NA	NA	NA	NA	NA	NA	NA	NA	NA	NA	NA	NA
FAM129C	NA	NA	NA	NA	NA	NA	-1.01443	3.16101e-05	NA	NA	NA	NA	NA	NA	NA	NA	NA	NA	NA	NA	NA	NA	NA	NA	NA	NA	NA	NA	NA	NA
FAM133B	0.542877	1.17465e-56	NA	NA	NA	NA	NA	NA	NA	NA	NA	NA	NA	NA	-0.318942	1	NA	NA	NA	NA	NA	NA	NA	NA	0.287134	1	2.94222	1	0.274439	0.252415
FAM162A	NA	NA	NA	NA	-0.45457	1	NA	NA	NA	NA	NA	NA	NA	NA	NA	NA	NA	NA	NA	NA	NA	NA	NA	NA	NA	NA	NA	NA	NA	NA
FAM173A	-0.31964	4.23526e-36	-0.291767	1.76459e-05	-0.266128	1	-0.260546	0.860548	NA	NA	NA	NA	NA	NA	NA	NA	NA	NA	NA	NA	NA	NA	NA	NA	NA	NA	NA	NA	NA	NA
FAM174C	0.448271	2.74879e-121	0.50929	1.3021e-19	0.367661	1.37609e-05	0.462407	1	NA	NA	NA	NA	NA	NA	-0.45542	0.170529	NA	NA	NA	NA	NA	NA	NA	NA	0.38825	1	NA	NA	NA	NA
FAM177A1	NA	NA	NA	NA	-0.47569	1	NA	NA	NA	NA	NA	NA	NA	NA	0.482682	0.360138	NA	NA	NA	NA	NA	NA	NA	NA	1.02335	7.66546e-06	1.07534	1	NA	NA
FAM192A	NA	NA	-0.291489	5.91702e-05	NA	NA	NA	NA	NA	NA	NA	NA	NA	NA	NA	NA	NA	NA	NA	NA	NA	NA	NA	NA	NA	NA	NA	NA	NA	NA
FAM198B	-0.37446	2.13028e-40	NA	NA	NA	NA	NA	NA	NA	NA	NA	NA	NA	NA	NA	NA	NA	NA	NA	NA	NA	NA	NA	NA	NA	NA	NA	NA	NA	NA
FAM200B	NA	NA	0.393911	0.00567333	0.262722	1	NA	NA	NA	NA	NA	NA	NA	NA	-0.327781	1	NA	NA	NA	NA	NA	NA	NA	NA	NA	NA	1.05516	1	NA	NA
FAM208A	NA	NA	NA	NA	-0.264207	1	NA	NA	NA	NA	NA	NA	NA	NA	NA	NA	NA	NA	NA	NA	NA	NA	NA	NA	NA	NA	NA	NA	NA	NA
FAM208B	NA	NA	NA	NA	NA	NA	-0.279969	1	NA	NA	NA	NA	NA	NA	NA	NA	NA	NA	NA	NA	NA	NA	NA	NA	NA	NA	NA	NA	NA	NA
FAM213A	NA	NA	NA	NA	NA	NA	-0.432831	0.860548	NA	NA	NA	NA	NA	NA	NA	NA	NA	NA	NA	NA	NA	NA	NA	NA	NA	NA	NA	NA	NA	NA
FAM214A	NA	NA	NA	NA	NA	NA	NA	NA	NA	NA	NA	NA	NA	NA	-0.305042	1	NA	NA	NA	NA	0.309273	1	NA	NA	NA	NA	2.10503	1	NA	NA
FAM30A	NA	NA	NA	NA	NA	NA	NA	NA	NA	NA	NA	NA	NA	NA	NA	NA	NA	NA	NA	NA	NA	NA	NA	NA	-1.12023	0.00983281	NA	NA	NA	NA
FAM43A	NA	NA	NA	NA	NA	NA	NA	NA	NA	NA	NA	NA	NA	NA	0.363523	1	NA	NA	NA	NA	NA	NA	NA	NA	-0.354836	1	NA	NA	NA	NA
FAM45A	-0.589284	1.6137e-63	-0.718635	5.39574e-16	NA	NA	NA	NA	NA	NA	NA	NA	NA	NA	0.327516	0.0120688	NA	NA	NA	NA	NA	NA	NA	NA	NA	NA	NA	NA	NA	NA
FAM49A	-0.658155	5.88106e-70	-0.953506	5.542e-14	NA	NA	NA	NA	NA	NA	NA	NA	NA	NA	NA	NA	NA	NA	NA	NA	NA	NA	NA	NA	NA	NA	NA	NA	NA	NA
FAM49B	0.317479	3.37703e-36	0.313388	1	NA	NA	NA	NA	NA	NA	-0.26518	1.17154e-37	NA	NA	NA	NA	NA	NA	NA	NA	NA	NA	NA	NA	NA	NA	NA	NA	NA	NA
FAM50A	NA	NA	NA	NA	NA	NA	NA	NA	NA	NA	NA	NA	NA	NA	NA	NA	NA	NA	NA	NA	NA	NA	NA	NA	NA	NA	-0.855563	1	NA	NA
FAM69B	NA	NA	NA	NA	NA	NA	NA	NA	NA	NA	NA	NA	NA	NA	NA	NA	NA	NA	NA	NA	NA	NA	NA	NA	-0.379063	1	NA	NA	NA	NA
FAM76A	NA	NA	NA	NA	NA	NA	-0.266467	1	NA	NA	NA	NA	NA	NA	NA	NA	NA	NA	NA	NA	NA	NA	NA	NA	NA	NA	NA	NA	NA	NA
FAM89B	0.276653	3.65634e-64	0.303775	1	NA	NA	NA	NA	NA	NA	NA	NA	NA	NA	-0.336293	1	NA	NA	NA	NA	NA	NA	NA	NA	NA	NA	NA	NA	NA	NA
FAM96A	-0.370522	2.7446e-40	-0.467895	1.63628e-10	-0.276948	1	-0.465081	0.0178068	NA	NA	NA	NA	NA	NA	NA	NA	NA	NA	NA	NA	NA	NA	NA	NA	NA	NA	NA	NA	NA	NA
FAM96B	-0.884146	2.67662e-112	-0.906625	2.1064e-20	-0.831388	0.000914851	-0.767451	0.000137431	NA	NA	NA	NA	NA	NA	0.772623	3.10072e-09	NA	NA	NA	NA	NA	NA	-0.295688	1	-0.439402	0.0361957	NA	NA	NA	NA
FAU	-0.546384	2.86544e-99	-0.536397	1.16466e-14	-0.616135	7.43995e-08	NA	NA	NA	NA	NA	NA	NA	NA	NA	NA	NA	NA	NA	NA	NA	NA	NA	NA	0.320529	1	0.520245	1	-1.08471	1.82899e-13
FAXDC2	NA	NA	NA	NA	NA	NA	NA	NA	NA	NA	NA	NA	NA	NA	NA	NA	NA	NA	NA	NA	NA	NA	NA	NA	NA	NA	-1.07879	1	NA	NA
FBRS	NA	NA	NA	NA	NA	NA	-0.266913	1	NA	NA	NA	NA	NA	NA	NA	NA	NA	NA	NA	NA	NA	NA	NA	NA	NA	NA	NA	NA	0.280641	1
FBXO22	NA	NA	NA	NA	NA	NA	-0.353649	1	NA	NA	NA	NA	NA	NA	NA	NA	NA	NA	NA	NA	NA	NA	NA	NA	NA	NA	NA	NA	NA	NA
FBXO7	NA	NA	NA	NA	NA	NA	NA	NA	NA	NA	NA	NA	NA	NA	NA	NA	NA	NA	NA	NA	NA	NA	NA	NA	-0.488205	0.00142572	1.21549	1	NA	NA
FBXW7	0.251928	2.98133e-65	NA	NA	-0.277848	1	NA	NA	NA	NA	NA	NA	NA	NA	NA	NA	NA	NA	NA	NA	0.273025	1	NA	NA	0.301674	0.868793	NA	NA	NA	NA
FBXW9	NA	NA	NA	NA	NA	NA	NA	NA	NA	NA	NA	NA	NA	NA	NA	NA	NA	NA	NA	NA	NA	NA	NA	NA	-0.31911	0.296057	1.572	1	NA	NA
FCER1A	NA	NA	NA	NA	-1.90222	0.000223861	NA	NA	NA	NA	NA	NA	NA	NA	NA	NA	NA	NA	NA	NA	NA	NA	NA	NA	-0.613318	0.145125	NA	NA	NA	NA
FCER1G	NA	NA	0.674513	5.89221e-17	0.628577	1	-0.879115	1	NA	NA	NA	NA	NA	NA	NA	NA	NA	NA	NA	NA	NA	NA	NA	NA	NA	NA	-1.67093	1	NA	NA
FCGR2A	NA	NA	0.877742	3.06721e-10	0.929656	0.030853	NA	NA	NA	NA	NA	NA	NA	NA	NA	NA	NA	NA	NA	NA	NA	NA	NA	NA	NA	NA	-1.88467	1	NA	NA
FCGR3A	NA	NA	-0.651337	1.03456e-05	NA	NA	NA	NA	NA	NA	-0.291199	3.93444e-18	-0.262726	3.31013e-05	-0.479066	1	-0.366071	1.56907e-14	NA	NA	NA	NA	-0.585709	1	NA	NA	-1.01352	1	NA	NA
FCGRT	-0.640502	1.64671e-95	NA	NA	-0.913843	0.0308425	-0.354069	1	NA	NA	NA	NA	NA	NA	NA	NA	NA	NA	NA	NA	NA	NA	NA	NA	0.322216	1	NA	NA	NA	NA
FCHSD2	NA	NA	NA	NA	NA	NA	-0.366969	1	NA	NA	NA	NA	NA	NA	NA	NA	NA	NA	NA	NA	NA	NA	NA	NA	NA	NA	NA	NA	NA	NA
FCMR	NA	NA	NA	NA	NA	NA	NA	NA	NA	NA	NA	NA	NA	NA	NA	NA	NA	NA	NA	NA	-0.273366	1	-0.257429	1	0.60845	1	NA	NA	0.304457	1
FDFT1	0.362404	8.58041e-80	0.409792	1	0.434543	1	NA	NA	NA	NA	NA	NA	NA	NA	NA	NA	NA	NA	NA	NA	NA	NA	NA	NA	-0.344649	1	NA	NA	NA	NA
FDPS	0.3435	1.19422e-72	0.557815	1.23557e-09	0.557187	0.143844	NA	NA	NA	NA	NA	NA	NA	NA	NA	NA	NA	NA	NA	NA	NA	NA	NA	NA	-0.36578	0.594722	NA	NA	NA	NA
FDX1	NA	NA	NA	NA	NA	NA	NA	NA	NA	NA	NA	NA	NA	NA	0.25979	1	NA	NA	NA	NA	NA	NA	NA	NA	-0.425068	0.256626	NA	NA	NA	NA
FEM1C	NA	NA	-0.332999	1	NA	NA	NA	NA	NA	NA	NA	NA	NA	NA	NA	NA	NA	NA	NA	NA	NA	NA	NA	NA	NA	NA	NA	NA	NA	NA
FERMT3	0.501342	6.64452e-63	0.874519	1.98045e-14	0.533031	1	-0.29261	1	NA	NA	NA	NA	NA	NA	NA	NA	NA	NA	NA	NA	NA	NA	NA	NA	-0.548614	0.0196642	-2.37946	1	NA	NA
FEZ2	NA	NA	NA	NA	NA	NA	-0.316421	1	NA	NA	NA	NA	NA	NA	NA	NA	NA	NA	NA	NA	NA	NA	NA	NA	NA	NA	1.29768	1	NA	NA
FGD2	NA	NA	NA	NA	-0.279999	1	NA	NA	NA	NA	NA	NA	NA	NA	NA	NA	NA	NA	NA	NA	NA	NA	NA	NA	NA	NA	NA	NA	NA	NA
FGD5-AS1	-0.356218	7.63369e-42	-0.440527	2.4199e-09	-0.33076	1	NA	NA	NA	NA	NA	NA	NA	NA	0.31376	1	NA	NA	NA	NA	NA	NA	NA	NA	NA	NA	NA	NA	NA	NA
FGFBP2	NA	NA	NA	NA	NA	NA	NA	NA	NA	NA	-0.625688	1.03253e-30	-0.544329	5.49907e-07	NA	NA	-0.371358	5.50585e-16	NA	NA	NA	NA	NA	NA	NA	NA	NA	NA	-1.17916	0.00284328
FGL2	-0.253908	1.41128e-25	-0.251378	1	NA	NA	NA	NA	NA	NA	NA	NA	NA	NA	NA	NA	NA	NA	NA	NA	NA	NA	NA	NA	NA	NA	NA	NA	NA	NA
FHL1	NA	NA	NA	NA	NA	NA	NA	NA	NA	NA	NA	NA	NA	NA	NA	NA	NA	NA	NA	NA	NA	NA	NA	NA	-1.01812	5.38698e-13	-2.10664	1	NA	NA
FHL3	NA	NA	NA	NA	NA	NA	NA	NA	NA	NA	NA	NA	NA	NA	NA	NA	NA	NA	NA	NA	NA	NA	NA	NA	-0.314852	1	NA	NA	NA	NA
FIBP	NA	NA	NA	NA	NA	NA	NA	NA	NA	NA	NA	NA	NA	NA	NA	NA	NA	NA	NA	NA	NA	NA	NA	NA	-0.434755	1.27596e-05	NA	NA	NA	NA
FIS1	-0.340861	4.76735e-59	NA	NA	NA	NA	NA	NA	NA	NA	NA	NA	NA	NA	NA	NA	NA	NA	NA	NA	NA	NA	NA	NA	-0.356176	0.173521	0.637221	1	NA	NA
FKBP1A	NA	NA	NA	NA	NA	NA	NA	NA	NA	NA	NA	NA	NA	NA	NA	NA	NA	NA	NA	NA	NA	NA	NA	NA	-0.489841	0.0549821	-0.926034	1	NA	NA
FKBP2	-0.478813	1.26803e-33	-0.559745	4.88054e-05	-0.676866	0.184978	-0.754997	1	NA	NA	NA	NA	NA	NA	0.640735	1.08374e-05	NA	NA	NA	NA	0.334827	1	NA	NA	-0.346353	0.160465	NA	NA	NA	NA
FKBP3	NA	NA	NA	NA	0.305347	1	NA	NA	NA	NA	NA	NA	NA	NA	NA	NA	NA	NA	NA	NA	NA	NA	NA	NA	-0.313778	0.628274	NA	NA	NA	NA
FKBP4	NA	NA	NA	NA	0.299211	1	NA	NA	NA	NA	NA	NA	NA	NA	NA	NA	NA	NA	NA	NA	NA	NA	NA	NA	-0.290439	0.630854	NA	NA	NA	NA
FKBP5	0.61218	1.18748e-84	0.471237	0.199016	0.872399	0.000438077	NA	NA	0.253483	1.51631e-54	NA	NA	NA	NA	NA	NA	NA	NA	NA	NA	NA	NA	NA	NA	0.300689	1	NA	NA	0.766684	0.00730219
FKBP8	-0.284344	1.75429e-57	-0.295692	0.971641	NA	NA	-0.25989	1	NA	NA	NA	NA	NA	NA	0.388206	1	NA	NA	NA	NA	NA	NA	NA	NA	-0.347125	0.000348549	-2.22825	1	NA	NA
FLII	NA	NA	NA	NA	NA	NA	NA	NA	NA	NA	NA	NA	NA	NA	NA	NA	NA	NA	NA	NA	NA	NA	NA	NA	NA	NA	-0.811911	1	NA	NA
FLNA	NA	NA	NA	NA	0.329598	1	-0.33856	1	NA	NA	NA	NA	NA	NA	NA	NA	0.392375	6.64739e-11	NA	NA	NA	NA	0.396188	1	NA	NA	-0.863829	1	-0.773453	0.206637
FLT1	-0.306587	1.84307e-07	0.479096	3.48372e-05	NA	NA	NA	NA	NA	NA	NA	NA	NA	NA	NA	NA	NA	NA	NA	NA	NA	NA	NA	NA	NA	NA	NA	NA	NA	NA
FMNL1	NA	NA	NA	NA	-0.48141	1	-0.437804	1	NA	NA	NA	NA	NA	NA	NA	NA	NA	NA	NA	NA	NA	NA	NA	NA	-0.440961	0.00126133	NA	NA	NA	NA
FMNL3	NA	NA	NA	NA	NA	NA	-0.258782	1	NA	NA	NA	NA	NA	NA	NA	NA	NA	NA	NA	NA	NA	NA	NA	NA	NA	NA	NA	NA	NA	NA
FNBP1	NA	NA	0.365252	0.708958	NA	NA	NA	NA	NA	NA	NA	NA	NA	NA	NA	NA	NA	NA	NA	NA	-0.306047	1	NA	NA	NA	NA	0.928596	1	NA	NA
FNDC3A	-0.250441	5.45989e-28	NA	NA	NA	NA	NA	NA	NA	NA	NA	NA	NA	NA	NA	NA	NA	NA	NA	NA	0.297117	1	NA	NA	NA	NA	1.11452	1	0.708944	1
FNTA	NA	NA	NA	NA	NA	NA	-0.282378	1	NA	NA	NA	NA	NA	NA	NA	NA	NA	NA	NA	NA	NA	NA	NA	NA	NA	NA	NA	NA	0.297327	1
FNTB	NA	NA	NA	NA	NA	NA	NA	NA	NA	NA	NA	NA	NA	NA	NA	NA	NA	NA	NA	NA	NA	NA	NA	NA	NA	NA	-1.56085	1	NA	NA
FOS	0.456632	6.54043e-15	0.45197	1	-0.398698	1	1.00952	1	0.84263	3.8752532997204e-319	0.593787	2.83692e-66	NA	NA	0.608217	1	NA	NA	0.81379	1.59065e-21	0.805315	1	0.433758	1	NA	NA	1.70874	1	NA	NA
FOSB	-0.585176	1.42297e-38	-0.653652	0.195461	-0.535734	1	NA	NA	NA	NA	NA	NA	-0.298755	5.82812e-08	NA	NA	NA	NA	NA	NA	NA	NA	NA	NA	-0.56294	1	3.23759	1	NA	NA
FOSL1	NA	NA	NA	NA	NA	NA	NA	NA	NA	NA	NA	NA	NA	NA	NA	NA	NA	NA	NA	NA	NA	NA	NA	NA	-0.342947	0.684534	NA	NA	NA	NA
FOSL2	-0.446408	8.26877e-47	-0.804599	9.74206e-08	-0.460493	1	NA	NA	NA	NA	NA	NA	NA	NA	NA	NA	NA	NA	NA	NA	NA	NA	NA	NA	NA	NA	0.567614	1	NA	NA
FOXN3	NA	NA	NA	NA	NA	NA	NA	NA	NA	NA	NA	NA	NA	NA	NA	NA	NA	NA	NA	NA	NA	NA	NA	NA	-0.592706	0.00364822	-0.547491	1	NA	NA
FOXO3	NA	NA	-0.567931	0.161958	NA	NA	NA	NA	NA	NA	NA	NA	NA	NA	NA	NA	NA	NA	NA	NA	NA	NA	NA	NA	-0.322289	1	NA	NA	NA	NA
FOXP1	NA	NA	-0.628525	0.0464296	-0.33623	1	NA	NA	NA	NA	NA	NA	NA	NA	NA	NA	NA	NA	NA	NA	NA	NA	NA	NA	NA	NA	2.63171	1	0.375237	1
FRMD4B	NA	NA	NA	NA	NA	NA	NA	NA	NA	NA	NA	NA	0.298539	1.2988e-11	NA	NA	NA	NA	NA	NA	NA	NA	0.517699	0.200845	-0.336972	0.017351	NA	NA	NA	NA
FSCN1	NA	NA	NA	NA	-0.790783	1	NA	NA	NA	NA	NA	NA	NA	NA	NA	NA	NA	NA	NA	NA	NA	NA	NA	NA	-0.498947	4.91009e-05	NA	NA	NA	NA
FSTL1	NA	NA	NA	NA	NA	NA	NA	NA	NA	NA	NA	NA	NA	NA	NA	NA	NA	NA	NA	NA	NA	NA	NA	NA	NA	NA	-1.54856	1	NA	NA
FTH1	-1.57701	2.11563e-288	-0.428946	0.0017896	-0.928039	3.42026e-07	-0.531059	0.957907	NA	NA	NA	NA	0.252864	1	0.430953	0.374442	NA	NA	NA	NA	NA	NA	NA	NA	0.355959	1	-1.30165	1	-0.774004	0.00314955
FTL	NA	NA	0.795125	3.98839e-05	1.11422	0.0281938	-0.339887	1	NA	NA	NA	NA	NA	NA	0.25044	1	NA	NA	NA	NA	0.312769	1	0.413402	1	NA	NA	-1.58154	1	-0.731481	0.000188348
FTX	NA	NA	NA	NA	NA	NA	NA	NA	NA	NA	NA	NA	NA	NA	NA	NA	NA	NA	NA	NA	NA	NA	NA	NA	-0.347565	1	NA	NA	NA	NA
FUOM	-0.303951	1.44105e-25	NA	NA	-0.431877	1	NA	NA	NA	NA	NA	NA	NA	NA	NA	NA	NA	NA	NA	NA	NA	NA	NA	NA	NA	NA	NA	NA	NA	NA
FUS	NA	NA	NA	NA	NA	NA	NA	NA	NA	NA	NA	NA	NA	NA	-0.385715	1	NA	NA	NA	NA	NA	NA	NA	NA	0.261074	1	1.31857	1	NA	NA
FXYD5	-0.307825	5.77787e-59	-0.330645	0.0452674	-0.293051	1	NA	NA	NA	NA	NA	NA	NA	NA	0.515002	0.0859705	NA	NA	-0.306967	1.85969e-07	NA	NA	NA	NA	-0.54385	0.00136591	-3.03087	1	NA	NA
FYB1	0.721223	1.78354e-56	0.719457	5.54343e-08	1.55041	1.44738e-10	NA	NA	NA	NA	NA	NA	NA	NA	-0.520682	1	NA	NA	NA	NA	NA	NA	-0.338882	1	0.996447	0.00186982	1.03734	1	0.426389	0.165249
FYN	NA	NA	-0.404636	1	NA	NA	-0.394056	1	NA	NA	-0.32941	2.29602e-35	NA	NA	-0.255883	1	NA	NA	NA	NA	NA	NA	-0.383367	0.372294	0.349135	1	-0.394499	1	NA	NA
FYTTD1	NA	NA	NA	NA	NA	NA	-0.723738	1	NA	NA	NA	NA	NA	NA	NA	NA	NA	NA	NA	NA	NA	NA	NA	NA	NA	NA	2.08302	1	NA	NA
G0S2	-1.52564	6.40181e-77	-1.17469	0.0498352	-0.42554	1	NA	NA	NA	NA	NA	NA	NA	NA	NA	NA	NA	NA	NA	NA	NA	NA	NA	NA	NA	NA	NA	NA	NA	NA
G3BP2	0.268899	1.08473e-55	NA	NA	-0.265869	1	NA	NA	NA	NA	NA	NA	NA	NA	-0.340448	1	NA	NA	-0.317478	1.61766e-05	NA	NA	NA	NA	0.3799	1	0.528411	1	NA	NA
GABARAPL1	-0.606128	3.39061e-71	-0.502773	0.0103514	-0.39118	1	-0.251192	1	NA	NA	NA	NA	NA	NA	NA	NA	NA	NA	NA	NA	NA	NA	NA	NA	0.420446	1	0.508386	1	-0.335094	0.952699
GABARAPL2	NA	NA	NA	NA	NA	NA	NA	NA	NA	NA	NA	NA	NA	NA	-0.397508	1	-0.300816	7.22959e-13	NA	NA	NA	NA	NA	NA	-0.460979	1.25438e-05	-0.890166	1	NA	NA
GABPA	NA	NA	NA	NA	NA	NA	NA	NA	NA	NA	NA	NA	NA	NA	NA	NA	NA	NA	NA	NA	NA	NA	NA	NA	NA	NA	-0.64771	1	NA	NA
GABPB1-AS1	-0.292689	4.11878e-26	NA	NA	-0.293069	1	-0.315667	1	NA	NA	NA	NA	NA	NA	NA	NA	NA	NA	NA	NA	NA	NA	NA	NA	-0.5492	0.0654607	NA	NA	NA	NA
GADD45A	NA	NA	0.399798	1	NA	NA	NA	NA	NA	NA	NA	NA	NA	NA	-0.292179	1	NA	NA	NA	NA	NA	NA	NA	NA	NA	NA	-1.58999	1	0.372071	1
GADD45B	-1.27398	1.45981e-118	-1.26801	4.57327e-11	-1.22286	0.137551	NA	NA	NA	NA	NA	NA	NA	NA	NA	NA	NA	NA	0.326473	0.418685	NA	NA	NA	NA	NA	NA	NA	NA	NA	NA
GADD45G	-0.459503	5.6355e-22	NA	NA	-0.591986	1	NA	NA	NA	NA	NA	NA	NA	NA	NA	NA	NA	NA	NA	NA	NA	NA	NA	NA	NA	NA	NA	NA	NA	NA
GALNT1	0.277513	7.3791e-45	0.480374	0.0526886	NA	NA	NA	NA	NA	NA	NA	NA	NA	NA	NA	NA	NA	NA	NA	NA	-0.275364	1	NA	NA	-0.436823	0.44781	NA	NA	NA	NA
GALNT11	NA	NA	NA	NA	NA	NA	NA	NA	NA	NA	NA	NA	-0.273773	6.88333e-10	NA	NA	NA	NA	NA	NA	NA	NA	NA	NA	NA	NA	NA	NA	NA	NA
GANAB	NA	NA	NA	NA	0.463216	0.159293	NA	NA	NA	NA	NA	NA	NA	NA	NA	NA	NA	NA	NA	NA	0.346905	1	NA	NA	-0.296802	0.0811498	0.600291	1	NA	NA
GAPDH	NA	NA	0.48935	1.81439e-06	0.426595	1	-0.521771	1	NA	NA	NA	NA	NA	NA	0.740699	1.40593e-05	0.253723	6.99021e-12	NA	NA	NA	NA	NA	NA	-1.31809	3.14958e-14	-1.42351	1	-0.492409	0.000756699
GARS	-0.287208	2.55156e-29	NA	NA	NA	NA	NA	NA	NA	NA	NA	NA	NA	NA	0.2809	1	NA	NA	NA	NA	NA	NA	NA	NA	NA	NA	NA	NA	NA	NA
GAS2L1	NA	NA	NA	NA	NA	NA	NA	NA	NA	NA	NA	NA	NA	NA	NA	NA	NA	NA	NA	NA	NA	NA	NA	NA	NA	NA	-2.48371	1	NA	NA
GAS7	-0.632815	1.60034e-77	-0.289127	0.000638972	-0.440585	0.0682727	NA	NA	NA	NA	NA	NA	NA	NA	NA	NA	NA	NA	NA	NA	NA	NA	NA	NA	NA	NA	NA	NA	NA	NA
GATA1	NA	NA	NA	NA	NA	NA	NA	NA	NA	NA	NA	NA	NA	NA	NA	NA	NA	NA	NA	NA	NA	NA	NA	NA	NA	NA	-1.20694	1	NA	NA
GATA2	NA	NA	NA	NA	NA	NA	NA	NA	NA	NA	NA	NA	NA	NA	NA	NA	NA	NA	NA	NA	NA	NA	NA	NA	-0.919847	0.00292251	NA	NA	NA	NA
GATAD1	NA	NA	NA	NA	NA	NA	NA	NA	NA	NA	NA	NA	NA	NA	NA	NA	NA	NA	NA	NA	NA	NA	NA	NA	-0.40982	0.187284	1.4866	1	NA	NA
GATAD2B	NA	NA	NA	NA	NA	NA	-0.294814	1	NA	NA	NA	NA	NA	NA	NA	NA	NA	NA	NA	NA	NA	NA	NA	NA	NA	NA	NA	NA	NA	NA
GBP4	NA	NA	-0.522249	0.172467	NA	NA	NA	NA	NA	NA	NA	NA	NA	NA	NA	NA	0.281943	3.75844e-12	NA	NA	NA	NA	NA	NA	-0.362748	0.00950486	1.21583	1	NA	NA
GBP5	-0.359478	2.73396e-16	-0.480082	1	NA	NA	NA	NA	NA	NA	NA	NA	0.286781	5.76032e-09	-0.348881	1	0.259041	1.83761e-12	NA	NA	NA	NA	NA	NA	NA	NA	1.572	1	NA	NA
GCC2	0.27375	1.53606e-40	-0.265487	1	NA	NA	NA	NA	NA	NA	NA	NA	NA	NA	-0.556626	1	NA	NA	NA	NA	NA	NA	NA	NA	0.512479	1	3.0331	1	1.01044	5.15932e-08
GCLM	0.330862	1.63112e-74	0.34283	4.40512e-07	0.516743	0.135632	NA	NA	NA	NA	NA	NA	NA	NA	NA	NA	NA	NA	NA	NA	NA	NA	NA	NA	NA	NA	-1.98625	1	NA	NA
GCSH	NA	NA	NA	NA	NA	NA	NA	NA	NA	NA	NA	NA	NA	NA	NA	NA	NA	NA	NA	NA	NA	NA	NA	NA	-0.298735	0.644379	NA	NA	NA	NA
GDE1	NA	NA	NA	NA	NA	NA	-0.275023	1	NA	NA	NA	NA	NA	NA	NA	NA	NA	NA	NA	NA	NA	NA	0.303259	1	-0.276019	1	NA	NA	NA	NA
GDI2	NA	NA	NA	NA	NA	NA	NA	NA	NA	NA	NA	NA	NA	NA	NA	NA	NA	NA	NA	NA	NA	NA	NA	NA	-0.339287	0.55713	NA	NA	NA	NA
GEM	NA	NA	NA	NA	-0.541647	1	-0.287177	1	NA	NA	NA	NA	NA	NA	NA	NA	NA	NA	NA	NA	NA	NA	NA	NA	NA	NA	NA	NA	NA	NA
GET3	0.391678	1.14606e-123	0.460874	4.58595e-17	0.561754	0.00020691	NA	NA	NA	NA	NA	NA	NA	NA	-0.281692	1	NA	NA	NA	NA	NA	NA	NA	NA	NA	NA	NA	NA	NA	NA
GFI1B	NA	NA	NA	NA	NA	NA	NA	NA	NA	NA	NA	NA	NA	NA	NA	NA	NA	NA	NA	NA	NA	NA	NA	NA	NA	NA	-0.667345	1	NA	NA
GGA2	NA	NA	NA	NA	NA	NA	-0.290156	1	NA	NA	NA	NA	NA	NA	NA	NA	NA	NA	NA	NA	NA	NA	NA	NA	NA	NA	NA	NA	NA	NA
GGCX	NA	NA	NA	NA	-0.330625	1	NA	NA	NA	NA	NA	NA	NA	NA	NA	NA	NA	NA	NA	NA	NA	NA	NA	NA	NA	NA	1.05588	1	NA	NA
GGNBP2	0.294404	1.30859e-61	NA	NA	NA	NA	-0.296784	1	NA	NA	NA	NA	NA	NA	NA	NA	NA	NA	NA	NA	NA	NA	NA	NA	NA	NA	0.366336	1	NA	NA
GHITM	NA	NA	NA	NA	0.486952	1	NA	NA	NA	NA	NA	NA	NA	NA	NA	NA	NA	NA	NA	NA	NA	NA	NA	NA	NA	NA	-0.364137	1	-0.399109	1
GIGYF2	NA	NA	NA	NA	NA	NA	NA	NA	NA	NA	NA	NA	NA	NA	-0.32398	1	NA	NA	NA	NA	NA	NA	NA	NA	NA	NA	NA	NA	0.348842	1
GIMAP2	NA	NA	-0.265966	1	0.263818	1	NA	NA	NA	NA	NA	NA	NA	NA	NA	NA	NA	NA	NA	NA	NA	NA	NA	NA	NA	NA	NA	NA	NA	NA
GIMAP4	NA	NA	NA	NA	0.255039	1	NA	NA	NA	NA	NA	NA	NA	NA	-0.251147	1	NA	NA	NA	NA	NA	NA	NA	NA	NA	NA	NA	NA	NA	NA
GIMAP7	NA	NA	NA	NA	-0.255162	1	0.374005	1	NA	NA	NA	NA	NA	NA	-0.716348	1	NA	NA	NA	NA	NA	NA	-0.29686	1	1.06573	0.19206	NA	NA	0.319691	1
GIT2	NA	NA	NA	NA	NA	NA	NA	NA	NA	NA	NA	NA	NA	NA	NA	NA	NA	NA	NA	NA	NA	NA	NA	NA	-0.279926	1	NA	NA	NA	NA
GLA	NA	NA	NA	NA	NA	NA	NA	NA	NA	NA	NA	NA	NA	NA	NA	NA	NA	NA	NA	NA	NA	NA	NA	NA	NA	NA	-0.95524	1	NA	NA
GLG1	NA	NA	NA	NA	0.383522	1	NA	NA	NA	NA	NA	NA	NA	NA	-0.403424	1	NA	NA	NA	NA	NA	NA	NA	NA	NA	NA	1.80493	1	0.298048	1
GLIPR1	NA	NA	NA	NA	0.320616	1	NA	NA	-0.353944	1.9296e-125	-0.366052	5.30733e-51	NA	NA	-0.586407	1	NA	NA	-0.364597	4.88297e-09	NA	NA	NA	NA	NA	NA	0.692283	1	-0.341673	1
GLRX	0.339455	1.88518e-51	0.482414	0.0836381	0.756819	0.0137325	-0.466606	1	NA	NA	NA	NA	NA	NA	NA	NA	NA	NA	NA	NA	NA	NA	NA	NA	NA	NA	NA	NA	NA	NA
GLRX3	NA	NA	NA	NA	NA	NA	NA	NA	NA	NA	NA	NA	NA	NA	NA	NA	NA	NA	NA	NA	NA	NA	NA	NA	-0.341202	0.50955	NA	NA	NA	NA
GLRX5	NA	NA	NA	NA	NA	NA	-0.328937	1	NA	NA	NA	NA	NA	NA	NA	NA	NA	NA	NA	NA	NA	NA	NA	NA	NA	NA	NA	NA	NA	NA
GLS	NA	NA	NA	NA	-0.43555	1	NA	NA	NA	NA	NA	NA	NA	NA	-0.422506	1	NA	NA	NA	NA	NA	NA	0.267358	1	0.314526	1	1.74764	1	0.273254	1
GLT1D1	0.364256	3.53651e-102	0.38313	6.41728e-10	0.289259	0.000477023	-0.352348	1	NA	NA	NA	NA	NA	NA	NA	NA	NA	NA	NA	NA	NA	NA	NA	NA	NA	NA	NA	NA	NA	NA
GLUL	-0.291127	8.88734e-22	0.578138	0.148154	0.46028	1	NA	NA	NA	NA	NA	NA	NA	NA	NA	NA	NA	NA	NA	NA	NA	NA	NA	NA	-0.533421	0.20082	-2.23934	1	NA	NA
GMEB1	NA	NA	NA	NA	NA	NA	NA	NA	NA	NA	NA	NA	NA	NA	NA	NA	NA	NA	NA	NA	NA	NA	NA	NA	-0.253793	0.404187	NA	NA	NA	NA
GMFG	NA	NA	NA	NA	0.313812	1	NA	NA	NA	NA	NA	NA	NA	NA	NA	NA	NA	NA	NA	NA	NA	NA	NA	NA	-0.568067	0.0104963	NA	NA	-0.902961	7.41701e-06
GMPR	NA	NA	NA	NA	NA	NA	NA	NA	NA	NA	NA	NA	NA	NA	NA	NA	NA	NA	NA	NA	NA	NA	NA	NA	NA	NA	-2.88372	1	NA	NA
GMPR2	NA	NA	NA	NA	NA	NA	NA	NA	NA	NA	NA	NA	NA	NA	NA	NA	NA	NA	NA	NA	NA	NA	NA	NA	-0.48696	0.000871173	NA	NA	NA	NA
GNA12	NA	NA	NA	NA	-0.378785	1	NA	NA	NA	NA	NA	NA	NA	NA	NA	NA	NA	NA	NA	NA	NA	NA	NA	NA	-0.275108	1	NA	NA	NA	NA
GNA13	-0.500592	3.52967e-63	-0.29367	1	-0.674266	1	-0.343691	1	NA	NA	NA	NA	NA	NA	NA	NA	NA	NA	NA	NA	NA	NA	NA	NA	0.379	1	1.2173	1	NA	NA
GNA15	-0.333642	1.08828e-57	NA	NA	-0.606884	0.269057	-0.504017	1	NA	NA	NA	NA	NA	NA	NA	NA	NA	NA	NA	NA	NA	NA	NA	NA	-0.719683	3.20141e-11	-1.40283	1	NA	NA
GNAI1	NA	NA	NA	NA	NA	NA	NA	NA	NA	NA	NA	NA	NA	NA	NA	NA	NA	NA	NA	NA	NA	NA	NA	NA	-0.333824	1	NA	NA	NA	NA
GNAI2	NA	NA	NA	NA	NA	NA	NA	NA	NA	NA	NA	NA	NA	NA	NA	NA	NA	NA	NA	NA	NA	NA	NA	NA	NA	NA	-2.41588	1	-0.544741	0.0669737
GNAI3	0.308317	5.24818e-55	NA	NA	NA	NA	NA	NA	NA	NA	NA	NA	NA	NA	NA	NA	NA	NA	NA	NA	NA	NA	NA	NA	-0.358601	0.438322	-1.20257	1	NA	NA
GNAQ	0.668147	2.01725e-66	0.273005	1	0.705519	1	NA	NA	NA	NA	NA	NA	NA	NA	NA	NA	NA	NA	NA	NA	NA	NA	NA	NA	-0.85408	1.42675e-07	0.297672	1	NA	NA
GNAS	NA	NA	NA	NA	-0.426005	1	NA	NA	NA	NA	NA	NA	NA	NA	NA	NA	NA	NA	NA	NA	NA	NA	NA	NA	NA	NA	-1.96212	1	0.453348	0.214036
GNAZ	NA	NA	NA	NA	NA	NA	NA	NA	NA	NA	NA	NA	NA	NA	NA	NA	NA	NA	NA	NA	NA	NA	NA	NA	NA	NA	-2.27665	1	NA	NA
GNB1	0.316751	8.49606e-29	0.391511	1	0.43092	1	NA	NA	NA	NA	NA	NA	NA	NA	-0.254388	1	NA	NA	NA	NA	NA	NA	NA	NA	NA	NA	-1.86057	1	NA	NA
GNB2	NA	NA	0.329066	1	0.557128	1	NA	NA	NA	NA	NA	NA	NA	NA	NA	NA	NA	NA	NA	NA	NA	NA	NA	NA	NA	NA	-0.556366	1	NA	NA
GNB4	NA	NA	NA	NA	0.287182	1	NA	NA	NA	NA	NA	NA	NA	NA	NA	NA	NA	NA	NA	NA	NA	NA	NA	NA	-0.32192	1	NA	NA	NA	NA
GNB5	NA	NA	NA	NA	NA	NA	NA	NA	NA	NA	NA	NA	NA	NA	NA	NA	NA	NA	-0.282299	0.000160599	NA	NA	NA	NA	NA	NA	-0.987158	1	NA	NA
GNG11	NA	NA	NA	NA	NA	NA	NA	NA	NA	NA	NA	NA	NA	NA	NA	NA	NA	NA	NA	NA	NA	NA	NA	NA	NA	NA	-2.2062	1	NA	NA
GNG5	NA	NA	0.297894	0.414149	NA	NA	-0.592459	1	NA	NA	NA	NA	NA	NA	NA	NA	NA	NA	NA	NA	NA	NA	NA	NA	-0.723541	1.61826e-06	NA	NA	NA	NA
GNG7	NA	NA	NA	NA	-0.470041	1	-0.268462	1	NA	NA	NA	NA	NA	NA	NA	NA	NA	NA	NA	NA	-0.52597	0.0476337	NA	NA	NA	NA	NA	NA	NA	NA
GNL1	NA	NA	NA	NA	-0.255285	1	NA	NA	NA	NA	NA	NA	NA	NA	-0.295237	1	NA	NA	NA	NA	NA	NA	NA	NA	-0.384738	1	1.05588	1	NA	NA
GNL2	NA	NA	NA	NA	-0.266293	1	NA	NA	NA	NA	NA	NA	NA	NA	NA	NA	NA	NA	NA	NA	NA	NA	NA	NA	NA	NA	NA	NA	NA	NA
GNL3	0.263515	2.34513e-44	0.313732	0.129717	0.398194	1	NA	NA	0.334391	3.24241e-124	NA	NA	NA	NA	NA	NA	0.29217	4.4256e-22	NA	NA	0.434004	0.0762179	NA	NA	NA	NA	1.88458	1	0.90595	0.00014415
GNLY	-1.07596	6.29977e-12	-0.660692	1	-0.906116	1	NA	NA	NA	NA	-1.1301	2.37757e-43	-0.664118	2.12308e-05	NA	NA	NA	NA	NA	NA	-0.590618	1	NA	NA	-0.304818	1	-2.60486	1	-2.3573	4.96172e-07
GOLGA2	NA	NA	NA	NA	0.305005	1	NA	NA	NA	NA	NA	NA	NA	NA	NA	NA	NA	NA	NA	NA	NA	NA	NA	NA	NA	NA	-0.551382	1	NA	NA
GOLGA4	0.340953	1.70196e-60	0.290246	1	NA	NA	NA	NA	NA	NA	NA	NA	NA	NA	-0.401964	1	NA	NA	NA	NA	NA	NA	NA	NA	NA	NA	2.21884	1	0.872904	2.94118e-05
GOLGA8A	NA	NA	NA	NA	NA	NA	NA	NA	NA	NA	NA	NA	NA	NA	NA	NA	NA	NA	NA	NA	NA	NA	0.278335	0.675396	NA	NA	2.49338	1	1.22952	3.66443e-07
GOLGA8B	NA	NA	NA	NA	NA	NA	NA	NA	NA	NA	NA	NA	NA	NA	NA	NA	NA	NA	NA	NA	NA	NA	0.298021	1	NA	NA	2.25679	1	0.78671	0.0421119
GOLGB1	0.360692	3.86948e-62	NA	NA	NA	NA	NA	NA	NA	NA	NA	NA	NA	NA	-0.517858	1	NA	NA	NA	NA	0.356284	1	NA	NA	-0.253615	1	-1.38626	1	0.59004	1
GOLIM4	NA	NA	NA	NA	NA	NA	NA	NA	NA	NA	NA	NA	NA	NA	NA	NA	NA	NA	NA	NA	NA	NA	NA	NA	-0.333013	1	NA	NA	NA	NA
GOLPH3	0.286435	1.11832e-72	NA	NA	0.461957	1	NA	NA	NA	NA	NA	NA	NA	NA	0.272309	1	NA	NA	NA	NA	NA	NA	NA	NA	-0.471297	0.000730699	0.503262	1	NA	NA
GOSR1	NA	NA	NA	NA	NA	NA	NA	NA	NA	NA	NA	NA	NA	NA	NA	NA	NA	NA	NA	NA	NA	NA	NA	NA	-0.265851	0.149302	NA	NA	0.575827	1
GP1BA	NA	NA	NA	NA	NA	NA	NA	NA	NA	NA	NA	NA	NA	NA	NA	NA	NA	NA	NA	NA	NA	NA	NA	NA	NA	NA	-1.61618	1	NA	NA
GP6	NA	NA	NA	NA	NA	NA	NA	NA	NA	NA	NA	NA	NA	NA	NA	NA	NA	NA	NA	NA	NA	NA	NA	NA	NA	NA	-1.45946	1	NA	NA
GP9	NA	NA	NA	NA	NA	NA	NA	NA	NA	NA	NA	NA	NA	NA	NA	NA	NA	NA	NA	NA	NA	NA	NA	NA	NA	NA	-2.64492	1	NA	NA
GPAT3	NA	NA	NA	NA	-0.40046	1	NA	NA	NA	NA	NA	NA	NA	NA	NA	NA	NA	NA	NA	NA	NA	NA	NA	NA	NA	NA	NA	NA	NA	NA
GPATCH2L	NA	NA	NA	NA	NA	NA	-0.375652	1	NA	NA	NA	NA	NA	NA	NA	NA	NA	NA	NA	NA	NA	NA	NA	NA	-0.476876	0.0510989	NA	NA	NA	NA
GPATCH8	NA	NA	NA	NA	0.305987	1	NA	NA	NA	NA	NA	NA	NA	NA	NA	NA	NA	NA	NA	NA	NA	NA	NA	NA	NA	NA	NA	NA	0.719956	0.00857181
GPBP1	NA	NA	NA	NA	-0.29381	1	NA	NA	NA	NA	NA	NA	NA	NA	-0.397536	1	NA	NA	NA	NA	NA	NA	-0.273107	1	0.713214	0.00246979	1.57666	1	0.398458	0.408736
GPCPD1	NA	NA	0.272834	1	0.961214	0.000702051	0.290889	1	NA	NA	NA	NA	NA	NA	-0.450057	1	NA	NA	NA	NA	NA	NA	NA	NA	0.639009	1	1.8693	1	0.348347	0.767677
GPR132	-0.334458	2.26021e-56	-0.371401	0.470061	NA	NA	-0.329751	1	NA	NA	NA	NA	NA	NA	NA	NA	NA	NA	NA	NA	NA	NA	NA	NA	NA	NA	NA	NA	0.578521	1
GPR137	NA	NA	NA	NA	NA	NA	NA	NA	NA	NA	NA	NA	NA	NA	NA	NA	NA	NA	NA	NA	NA	NA	NA	NA	NA	NA	-0.721797	1	NA	NA
GPR137B	NA	NA	NA	NA	-0.344663	1	NA	NA	NA	NA	NA	NA	NA	NA	NA	NA	NA	NA	NA	NA	NA	NA	NA	NA	NA	NA	NA	NA	NA	NA
GPR155	NA	NA	-0.27607	1	NA	NA	NA	NA	NA	NA	NA	NA	NA	NA	NA	NA	NA	NA	NA	NA	NA	NA	NA	NA	NA	NA	NA	NA	NA	NA
GPR157	NA	NA	NA	NA	-0.721634	1	NA	NA	NA	NA	NA	NA	NA	NA	NA	NA	NA	NA	NA	NA	NA	NA	NA	NA	NA	NA	NA	NA	NA	NA
GPR160	NA	NA	NA	NA	-0.399731	1	NA	NA	NA	NA	NA	NA	NA	NA	NA	NA	NA	NA	NA	NA	NA	NA	NA	NA	NA	NA	NA	NA	NA	NA
GPR183	NA	NA	0.480809	0.0136024	-0.392454	1	0.794759	0.562075	NA	NA	NA	NA	NA	NA	-0.542531	1	NA	NA	-0.260654	1	NA	NA	NA	NA	1.00778	0.584123	0.862263	1	NA	NA
GPR35	NA	NA	NA	NA	-0.261904	1	NA	NA	NA	NA	NA	NA	NA	NA	NA	NA	NA	NA	NA	NA	NA	NA	NA	NA	NA	NA	NA	NA	NA	NA
GPRIN3	NA	NA	NA	NA	NA	NA	0.314058	1	0.331558	1.86484e-108	0.264641	9.07464e-44	NA	NA	NA	NA	0.306495	1.11159e-06	NA	NA	NA	NA	0.251448	1	0.257589	1	1.78676	1	1.10856	3.89562e-05
GPSM3	-0.265428	2.17883e-50	NA	NA	NA	NA	0.297482	1	NA	NA	NA	NA	NA	NA	NA	NA	NA	NA	NA	NA	NA	NA	NA	NA	0.286057	1	-1.71852	1	NA	NA
GPX3	NA	NA	NA	NA	-0.49372	1	NA	NA	NA	NA	NA	NA	NA	NA	NA	NA	NA	NA	NA	NA	NA	NA	NA	NA	NA	NA	NA	NA	NA	NA
GPX4	-0.648176	4.23683e-89	-0.328599	1	NA	NA	-0.408619	1	NA	NA	NA	NA	NA	NA	NA	NA	NA	NA	NA	NA	-0.382836	0.177493	NA	NA	-0.461129	0.0862386	-3.44983	1	-0.482905	1
GRAMD4	NA	NA	NA	NA	NA	NA	-0.26996	1	NA	NA	NA	NA	NA	NA	NA	NA	NA	NA	NA	NA	NA	NA	NA	NA	NA	NA	NA	NA	NA	NA
GRAP2	NA	NA	NA	NA	NA	NA	NA	NA	NA	NA	NA	NA	NA	NA	NA	NA	NA	NA	NA	NA	NA	NA	NA	NA	NA	NA	-1.51229	1	NA	NA
GRASP	-1.15321	5.60923e-91	-1.27614	1.94048e-18	-1.31337	3.9258e-07	-0.54762	1	NA	NA	NA	NA	NA	NA	0.412716	1	NA	NA	-0.25495	0.00257964	NA	NA	NA	NA	-0.460379	1	1.05588	1	NA	NA
GRHL1	NA	NA	NA	NA	NA	NA	NA	NA	NA	NA	NA	NA	NA	NA	NA	NA	NA	NA	NA	NA	NA	NA	NA	NA	NA	NA	-0.75005	1	NA	NA
GRHPR	NA	NA	NA	NA	NA	NA	NA	NA	NA	NA	NA	NA	NA	NA	NA	NA	NA	NA	NA	NA	NA	NA	NA	NA	-0.489715	0.000189387	NA	NA	NA	NA
GRK2	NA	NA	-0.484341	0.00206019	NA	NA	-0.506185	1	NA	NA	NA	NA	NA	NA	NA	NA	NA	NA	NA	NA	NA	NA	NA	NA	-0.424139	0.123771	NA	NA	0.432031	1
GRN	0.430078	4.46669e-24	0.695586	1.2071e-07	0.526924	0.851961	NA	NA	NA	NA	NA	NA	NA	NA	NA	NA	NA	NA	NA	NA	NA	NA	0.436121	1	-0.287441	1	NA	NA	NA	NA
GRSF1	NA	NA	NA	NA	NA	NA	NA	NA	NA	NA	NA	NA	NA	NA	NA	NA	NA	NA	NA	NA	NA	NA	NA	NA	NA	NA	-1.09805	1	NA	NA
GSE1	NA	NA	NA	NA	NA	NA	NA	NA	NA	NA	NA	NA	NA	NA	NA	NA	NA	NA	NA	NA	NA	NA	NA	NA	-0.530059	1.30475e-06	NA	NA	NA	NA
GSN	NA	NA	NA	NA	-0.450382	1	NA	NA	NA	NA	NA	NA	NA	NA	NA	NA	NA	NA	NA	NA	NA	NA	NA	NA	-0.39671	0.00688068	-2.88466	1	NA	NA
GSTK1	-0.377827	5.89184e-69	-0.536912	0.00066032	NA	NA	NA	NA	NA	NA	NA	NA	NA	NA	NA	NA	NA	NA	NA	NA	NA	NA	NA	NA	NA	NA	1.0259	1	0.411425	0.00946909
GSTO1	NA	NA	0.401785	0.0272481	0.817801	0.00734488	NA	NA	NA	NA	NA	NA	NA	NA	NA	NA	NA	NA	NA	NA	NA	NA	0.261654	1	-0.407105	0.00410881	-4.11895	1	NA	NA
GSTP1	-0.557136	6.45131e-46	NA	NA	NA	NA	0.268856	1	NA	NA	NA	NA	NA	NA	NA	NA	NA	NA	NA	NA	NA	NA	NA	NA	-0.968833	1.35766e-09	0.602753	1	NA	NA
GTDC1	NA	NA	NA	NA	NA	NA	NA	NA	NA	NA	NA	NA	NA	NA	NA	NA	NA	NA	NA	NA	NA	NA	NA	NA	NA	NA	-0.764905	1	NA	NA
GTF2A2	NA	NA	NA	NA	NA	NA	NA	NA	NA	NA	NA	NA	NA	NA	NA	NA	NA	NA	NA	NA	NA	NA	NA	NA	-0.270041	0.4783	0.379461	1	NA	NA
GTF2B	NA	NA	NA	NA	-0.271506	1	-0.310813	1	NA	NA	NA	NA	-0.273991	1.21922e-09	-0.557595	1	NA	NA	NA	NA	NA	NA	NA	NA	0.556224	0.190125	0.632812	1	NA	NA
GTF2I	0.275232	9.42779e-70	NA	NA	0.313418	1	NA	NA	NA	NA	NA	NA	NA	NA	NA	NA	NA	NA	NA	NA	0.297347	1	NA	NA	-0.545543	0.00122969	NA	NA	0.304369	1
GTF3C6	NA	NA	NA	NA	NA	NA	0.325295	1	NA	NA	NA	NA	NA	NA	NA	NA	NA	NA	NA	NA	NA	NA	NA	NA	NA	NA	-0.628949	1	NA	NA
GTPBP2	NA	NA	NA	NA	NA	NA	NA	NA	NA	NA	NA	NA	NA	NA	NA	NA	NA	NA	NA	NA	NA	NA	NA	NA	NA	NA	-1.12069	1	NA	NA
GTPBP4	NA	NA	NA	NA	NA	NA	-0.391267	1	NA	NA	NA	NA	NA	NA	NA	NA	NA	NA	NA	NA	NA	NA	NA	NA	NA	NA	NA	NA	NA	NA
GUCY1A1	NA	NA	NA	NA	NA	NA	NA	NA	NA	NA	NA	NA	NA	NA	NA	NA	NA	NA	NA	NA	NA	NA	NA	NA	NA	NA	-1.34514	1	NA	NA
GUCY1B1	NA	NA	NA	NA	NA	NA	NA	NA	NA	NA	NA	NA	NA	NA	NA	NA	NA	NA	NA	NA	NA	NA	NA	NA	NA	NA	-2.94332	1	NA	NA
GUK1	-0.282378	2.35684e-50	NA	NA	NA	NA	-0.811949	0.359624	NA	NA	NA	NA	NA	NA	NA	NA	NA	NA	NA	NA	NA	NA	NA	NA	0.596761	4.26894e-06	-1.68135	1	-0.392841	1
GXYLT1	NA	NA	NA	NA	NA	NA	NA	NA	NA	NA	NA	NA	NA	NA	-0.329983	1	NA	NA	NA	NA	NA	NA	NA	NA	NA	NA	NA	NA	NA	NA
GYPC	NA	NA	NA	NA	-0.860205	0.00735614	NA	NA	NA	NA	NA	NA	NA	NA	0.313276	1	NA	NA	NA	NA	NA	NA	-0.338961	1	NA	NA	NA	NA	-0.594372	0.00357018
GZF1	NA	NA	NA	NA	-0.301467	1	NA	NA	NA	NA	NA	NA	NA	NA	NA	NA	NA	NA	NA	NA	NA	NA	NA	NA	NA	NA	NA	NA	NA	NA
GZMA	NA	NA	NA	NA	NA	NA	NA	NA	NA	NA	-0.32	9.67778e-23	NA	NA	-0.52627	1	NA	NA	NA	NA	-0.287537	1	NA	NA	NA	NA	NA	NA	-0.642798	0.0402369
GZMB	NA	NA	NA	NA	NA	NA	1.02351	1	NA	NA	NA	NA	NA	NA	NA	NA	0.362072	3.08444e-10	NA	NA	NA	NA	0.660942	1	NA	NA	-1.59514	1	-1.59004	2.48042e-06
GZMH	NA	NA	NA	NA	-0.316519	1	NA	NA	NA	NA	-0.557885	2.35344e-27	-0.277249	0.0452942	-0.286953	1	NA	NA	NA	NA	NA	NA	NA	NA	NA	NA	NA	NA	-1.47717	2.83689e-07
GZMK	NA	NA	NA	NA	NA	NA	NA	NA	NA	NA	-0.523679	6.31519e-19	NA	NA	-0.645603	1	NA	NA	NA	NA	NA	NA	-0.928201	1	NA	NA	NA	NA	NA	NA
GZMM	NA	NA	NA	NA	NA	NA	NA	NA	NA	NA	NA	NA	-0.252547	1.48531e-07	NA	NA	NA	NA	NA	NA	NA	NA	NA	NA	0.995213	0.0311889	1.69787	1	-0.740382	0.00767965
H1-0	0.337321	2.08688e-69	0.283986	0.0009745	NA	NA	NA	NA	NA	NA	NA	NA	NA	NA	NA	NA	NA	NA	NA	NA	NA	NA	NA	NA	-0.383744	1	-1.33044	1	NA	NA
H1-10	1.39769	9.3926e-252	1.01682	4.45577e-20	1.72948	1.45219e-07	0.813686	1	NA	NA	NA	NA	NA	NA	-0.643893	0.000820352	-0.439227	4.95652e-07	NA	NA	NA	NA	NA	NA	NA	NA	NA	NA	NA	NA
H1-2	0.468052	1.99933e-119	NA	NA	0.591155	0.000548945	0.464101	1	NA	NA	NA	NA	0.327717	6.27091e-09	-0.283103	1	NA	NA	NA	NA	0.822536	0.00216899	0.761178	1	NA	NA	NA	NA	NA	NA
H1-3	NA	NA	NA	NA	0.310891	1	NA	NA	NA	NA	NA	NA	NA	NA	-0.33039	1	NA	NA	NA	NA	0.603327	1	0.482333	1	NA	NA	NA	NA	NA	NA
H1-4	NA	NA	0.331241	0.119111	NA	NA	0.35854	1	NA	NA	NA	NA	NA	NA	-0.27359	0.16359	NA	NA	NA	NA	0.364748	1	0.578777	1	NA	NA	NA	NA	0.33435	1
H1F0	NA	NA	NA	NA	NA	NA	NA	NA	NA	NA	NA	NA	NA	NA	NA	NA	NA	NA	NA	NA	NA	NA	NA	NA	-0.736878	0.0404095	NA	NA	NA	NA
H1FX	-1.3218	4.20286e-114	-1.23795	5.15313e-20	-1.3194	0.000150567	-1.30901	0.00116226	NA	NA	NA	NA	NA	NA	0.772319	3.01004e-09	0.251988	0.0424688	NA	NA	NA	NA	-0.25785	1	-1.64515	3.65037e-05	NA	NA	NA	NA
H2AC6	NA	NA	0.258131	2.18563e-05	NA	NA	NA	NA	NA	NA	NA	NA	NA	NA	NA	NA	NA	NA	NA	NA	NA	NA	NA	NA	NA	NA	-2.20184	1	0.704076	1
H2AFJ	-0.850233	3.08953e-99	-0.716478	3.13701e-14	-0.642514	0.0246498	-0.339306	1	NA	NA	NA	NA	NA	NA	0.644722	9.87922e-06	NA	NA	NA	NA	NA	NA	NA	NA	-0.377775	1	-2.04156	1	NA	NA
H2AFV	-1.04724	2.3951e-129	-1.02765	4.13517e-23	-1.29121	1.11129e-05	-1.163	1.49366e-05	NA	NA	NA	NA	NA	NA	0.593455	5.4027e-09	NA	NA	NA	NA	NA	NA	-0.692268	1	-1.12159	2.46716e-05	-0.802295	1	NA	NA
H2AFX	NA	NA	NA	NA	-0.441837	0.473916	-0.31152	1	NA	NA	NA	NA	NA	NA	0.402247	0.0367818	NA	NA	NA	NA	NA	NA	-0.358231	1	NA	NA	NA	NA	NA	NA
H2AFY	-1.72597	2.37719e-212	-1.65816	7.75425e-33	-1.78703	1.11129e-05	-1.11812	3.23215e-06	NA	NA	NA	NA	NA	NA	0.394465	0.000392468	NA	NA	NA	NA	NA	NA	-0.40779	1	-1.50837	1.4162e-05	NA	NA	NA	NA
H2AFZ	-1.24934	1.5435e-144	-1.69868	1.614e-31	-1.35147	2.18328e-05	-0.809468	0.000575544	NA	NA	NA	NA	NA	NA	0.970734	9.31801e-10	NA	NA	NA	NA	NA	NA	-0.81561	1	-0.69443	0.00194987	-1.28637	1	NA	NA
H2AJ	1.42025	0	0.941105	5.69469e-24	1.11381	1.80847e-05	0.366254	1	NA	NA	NA	NA	NA	NA	-0.475799	0.0942142	NA	NA	NA	NA	NA	NA	NA	NA	0.545024	1	-1.39214	1	0.367853	1
H2AX	NA	NA	NA	NA	NA	NA	NA	NA	NA	NA	NA	NA	NA	NA	-0.289002	1	NA	NA	NA	NA	NA	NA	NA	NA	0.459927	1	NA	NA	NA	NA
H2AZ1	0.862977	8.45561e-242	0.802703	3.59021e-23	0.891331	0.0032767	0.576742	1	NA	NA	NA	NA	NA	NA	-0.869817	1.18498e-07	NA	NA	NA	NA	NA	NA	0.319342	1	0.841942	1	-1.3682	1	-0.524408	1
H2AZ2	1.0468	2.89189e-234	0.718556	1.96052e-19	1.11329	4.27784e-05	0.666007	1	NA	NA	NA	NA	NA	NA	-0.858804	2.60786e-07	NA	NA	NA	NA	NA	NA	NA	NA	0.280662	1	NA	NA	NA	NA
H2BC11	NA	NA	NA	NA	NA	NA	NA	NA	NA	NA	NA	NA	NA	NA	NA	NA	NA	NA	NA	NA	NA	NA	NA	NA	NA	NA	-0.712425	1	NA	NA
H3-3A	2.21329	0	2.00811	1.15395e-35	1.25508	1.23424e-05	0.700755	0.0030963	-0.306612	1.4032e-214	NA	NA	NA	NA	-2.15478	3.81061e-14	-0.62461	7.87636e-45	NA	NA	-0.370578	1	NA	NA	0.479646	8.45602e-07	-1.28751	1	NA	NA
H3-3B	2.01404	0	1.52184	6.34988e-38	1.01793	1.12984e-07	0.656101	0.000752449	NA	NA	NA	NA	NA	NA	-1.99351	6.37903e-14	-0.305277	4.96302e-10	NA	NA	NA	NA	0.30699	1	1.17972	1.34228e-05	1.10274	1	0.308344	1
H3C10	NA	NA	NA	NA	NA	NA	NA	NA	NA	NA	NA	NA	NA	NA	NA	NA	NA	NA	NA	NA	NA	NA	NA	NA	NA	NA	-1.25021	1	NA	NA
H3F3A	-4.71046	0	-4.49652	4.8028e-37	-4.32891	2.731e-06	-3.07934	3.23215e-06	-0.333389	3.39441e-70	NA	NA	-0.361389	1	1.40535	1.5765e-14	NA	NA	NA	NA	NA	NA	-1.16237	1	-2.23605	1.36322e-05	-5.65489	1	-1.21801	0.093109
H3F3B	-4.54005	0	-4.52419	1.16773e-40	-4.32152	2.731e-06	-3.79615	3.23215e-06	-0.310339	5.09161e-48	-0.292623	2.70924e-42	-0.779608	5.3026e-18	1.09594	1.07603e-19	NA	NA	-0.310045	1.49033e-13	NA	NA	-0.873156	1	-2.25652	1.05852e-05	-3.30335	1	-1.80797	5.23284e-05
H4C3	0.365265	8.01346e-118	0.36	4.18575e-06	0.623703	0.0793992	0.671107	1	NA	NA	NA	NA	NA	NA	-1.01937	2.01489e-07	-0.279403	0.00318314	NA	NA	0.641544	1	0.409528	1	0.339526	1	NA	NA	0.832526	0.561636
HACD1	NA	NA	NA	NA	NA	NA	NA	NA	NA	NA	NA	NA	NA	NA	NA	NA	NA	NA	NA	NA	NA	NA	NA	NA	-0.405082	0.00254822	NA	NA	NA	NA
HACD4	NA	NA	NA	NA	NA	NA	NA	NA	NA	NA	NA	NA	NA	NA	NA	NA	NA	NA	NA	NA	NA	NA	NA	NA	NA	NA	-2.93867	1	NA	NA
HADHA	NA	NA	NA	NA	NA	NA	NA	NA	NA	NA	NA	NA	NA	NA	NA	NA	NA	NA	NA	NA	NA	NA	NA	NA	-0.481244	4.32511e-05	NA	NA	NA	NA
HADHB	NA	NA	NA	NA	NA	NA	NA	NA	NA	NA	NA	NA	NA	NA	NA	NA	NA	NA	NA	NA	NA	NA	NA	NA	-0.451326	0.0235753	NA	NA	NA	NA
HAGH	NA	NA	-0.395425	0.00127507	NA	NA	NA	NA	NA	NA	NA	NA	NA	NA	-0.274272	1	-0.263191	2.07195e-09	NA	NA	NA	NA	NA	NA	NA	NA	-0.935685	1	0.284032	1
HAS1	NA	NA	NA	NA	-0.314867	1	NA	NA	NA	NA	NA	NA	NA	NA	NA	NA	NA	NA	NA	NA	NA	NA	NA	NA	NA	NA	NA	NA	NA	NA
HAUS3	NA	NA	NA	NA	NA	NA	0.373536	1	NA	NA	NA	NA	NA	NA	-0.260933	1	NA	NA	NA	NA	NA	NA	NA	NA	NA	NA	2.30636	1	0.402512	1
HAVCR2	NA	NA	0.392111	1	-0.26787	1	NA	NA	NA	NA	NA	NA	NA	NA	NA	NA	NA	NA	NA	NA	NA	NA	0.498349	0.0400852	NA	NA	NA	NA	NA	NA
HBEGF	-0.88153	4.22614e-58	NA	NA	-0.395299	1	NA	NA	NA	NA	NA	NA	NA	NA	NA	NA	NA	NA	NA	NA	NA	NA	NA	NA	NA	NA	NA	NA	NA	NA
HBP1	NA	NA	NA	NA	NA	NA	NA	NA	NA	NA	NA	NA	NA	NA	-0.349766	1	NA	NA	NA	NA	NA	NA	NA	NA	0.293965	0.16125	1.78676	1	NA	NA
HBQ1	NA	NA	NA	NA	NA	NA	NA	NA	NA	NA	NA	NA	NA	NA	NA	NA	NA	NA	NA	NA	NA	NA	NA	NA	NA	NA	-1.68442	1	NA	NA
HBS1L	NA	NA	NA	NA	NA	NA	NA	NA	NA	NA	NA	NA	NA	NA	-0.278412	1	NA	NA	NA	NA	NA	NA	NA	NA	NA	NA	NA	NA	NA	NA
HCG18	NA	NA	NA	NA	-0.435879	1	-0.33466	1	NA	NA	NA	NA	NA	NA	NA	NA	NA	NA	NA	NA	NA	NA	NA	NA	NA	NA	NA	NA	NA	NA
HCST	-0.457212	6.06096e-48	NA	NA	NA	NA	NA	NA	NA	NA	NA	NA	NA	NA	NA	NA	NA	NA	-0.345039	0.000185693	-0.334939	1	NA	NA	NA	NA	-0.460505	1	-0.792366	5.71386e-05
HDAC1	NA	NA	NA	NA	NA	NA	0.277266	1	NA	NA	NA	NA	NA	NA	NA	NA	NA	NA	NA	NA	NA	NA	NA	NA	-0.265369	0.963657	NA	NA	NA	NA
HDAC2	NA	NA	NA	NA	0.386051	1	NA	NA	NA	NA	NA	NA	NA	NA	NA	NA	NA	NA	NA	NA	NA	NA	NA	NA	-0.319942	0.407801	1.21965	1	NA	NA
HDAC3	NA	NA	NA	NA	NA	NA	NA	NA	NA	NA	NA	NA	NA	NA	NA	NA	NA	NA	NA	NA	NA	NA	NA	NA	NA	NA	-1.08343	1	NA	NA
HDGF	NA	NA	0.501666	0.000543009	0.684063	0.0297172	NA	NA	NA	NA	NA	NA	NA	NA	NA	NA	NA	NA	NA	NA	NA	NA	NA	NA	NA	NA	-2.24927	1	NA	NA
HEBP1	NA	NA	NA	NA	NA	NA	NA	NA	NA	NA	NA	NA	NA	NA	NA	NA	NA	NA	NA	NA	NA	NA	NA	NA	-0.498087	0.000952251	-0.64771	1	NA	NA
HECA	0.291525	5.41793e-59	NA	NA	0.255128	1	0.503681	1	NA	NA	NA	NA	NA	NA	-0.277552	1	NA	NA	NA	NA	NA	NA	NA	NA	0.301762	1	0.58286	1	NA	NA
HELB	NA	NA	NA	NA	NA	NA	NA	NA	NA	NA	NA	NA	NA	NA	-0.428908	0.0841364	NA	NA	NA	NA	NA	NA	NA	NA	0.372255	1	0.931463	1	0.663571	1
HELZ	NA	NA	NA	NA	NA	NA	NA	NA	NA	NA	NA	NA	NA	NA	-0.256389	1	NA	NA	NA	NA	NA	NA	NA	NA	NA	NA	-0.894931	1	0.373236	1
HERC1	NA	NA	NA	NA	NA	NA	NA	NA	NA	NA	NA	NA	NA	NA	NA	NA	NA	NA	NA	NA	NA	NA	NA	NA	NA	NA	1.13065	1	0.906609	5.40129e-07
HERC5	NA	NA	-0.284349	1	NA	NA	NA	NA	NA	NA	NA	NA	NA	NA	NA	NA	NA	NA	NA	NA	NA	NA	NA	NA	NA	NA	NA	NA	NA	NA
HERPUD1	NA	NA	NA	NA	-0.513369	1	NA	NA	NA	NA	NA	NA	NA	NA	0.514261	1	NA	NA	NA	NA	NA	NA	0.287123	1	0.626307	1	NA	NA	NA	NA
HES1	NA	NA	NA	NA	NA	NA	NA	NA	NA	NA	NA	NA	NA	NA	NA	NA	NA	NA	NA	NA	NA	NA	NA	NA	-0.322373	1	NA	NA	NA	NA
HES4	-0.427208	1.38542e-17	-1.2214	4.89451e-11	-0.686334	1	-0.38602	1	NA	NA	NA	NA	NA	NA	NA	NA	NA	NA	NA	NA	NA	NA	NA	NA	NA	NA	0.622453	1	NA	NA
HEXA	NA	NA	NA	NA	-0.422263	1	NA	NA	NA	NA	NA	NA	NA	NA	NA	NA	NA	NA	NA	NA	NA	NA	NA	NA	-0.252485	0.134141	NA	NA	NA	NA
HEXDC	NA	NA	NA	NA	-0.318638	1	NA	NA	NA	NA	NA	NA	NA	NA	NA	NA	NA	NA	NA	NA	NA	NA	NA	NA	NA	NA	NA	NA	NA	NA
HEXIM2	NA	NA	NA	NA	NA	NA	NA	NA	NA	NA	NA	NA	NA	NA	NA	NA	NA	NA	NA	NA	NA	NA	NA	NA	NA	NA	-0.583689	1	NA	NA
HGD	NA	NA	NA	NA	NA	NA	NA	NA	NA	NA	NA	NA	NA	NA	NA	NA	NA	NA	NA	NA	NA	NA	NA	NA	NA	NA	-0.903236	1	NA	NA
HGSNAT	NA	NA	NA	NA	-0.399031	1	NA	NA	NA	NA	NA	NA	NA	NA	NA	NA	NA	NA	NA	NA	NA	NA	NA	NA	-0.334776	0.990488	0.325811	1	NA	NA
HHEX	NA	NA	NA	NA	NA	NA	NA	NA	NA	NA	NA	NA	NA	NA	NA	NA	NA	NA	NA	NA	NA	NA	NA	NA	-0.309179	0.0525447	NA	NA	NA	NA
HIC1	NA	NA	NA	NA	-0.754328	1	NA	NA	NA	NA	NA	NA	NA	NA	NA	NA	NA	NA	NA	NA	NA	NA	NA	NA	NA	NA	NA	NA	NA	NA
HIF1A	-0.575358	1.20657e-45	NA	NA	0.811426	0.632781	NA	NA	0.302789	2.7449e-83	NA	NA	NA	NA	NA	NA	0.329938	4.3058e-18	0.309232	0.000405991	NA	NA	0.459584	0.0498184	NA	NA	1.92951	1	0.37396	1
HIGD1A	0.292106	1.04912e-82	0.44388	1.56867e-05	0.394175	0.0390914	NA	NA	NA	NA	NA	NA	NA	NA	NA	NA	NA	NA	NA	NA	NA	NA	NA	NA	NA	NA	-1.19011	1	NA	NA
HIGD2A	-0.498435	1.63966e-76	-0.5969	9.1915e-07	-0.396628	1	NA	NA	NA	NA	NA	NA	NA	NA	NA	NA	NA	NA	NA	NA	NA	NA	NA	NA	NA	NA	0.310326	1	-0.336394	0.043823
HIKESHI	NA	NA	NA	NA	NA	NA	NA	NA	NA	NA	NA	NA	NA	NA	NA	NA	NA	NA	NA	NA	NA	NA	NA	NA	-0.276168	0.765007	NA	NA	NA	NA
HINT1	NA	NA	NA	NA	-0.57379	1	NA	NA	NA	NA	NA	NA	NA	NA	NA	NA	NA	NA	NA	NA	NA	NA	NA	NA	-0.733672	1.60634e-06	1.32482	1	-0.557313	0.0314683
HINT2	-0.280932	7.43823e-18	NA	NA	-0.367992	1	-0.394598	1	NA	NA	NA	NA	NA	NA	0.398227	0.0100382	NA	NA	NA	NA	NA	NA	NA	NA	NA	NA	NA	NA	NA	NA
HIPK1	0.665866	5.31913e-85	0.454602	0.000953411	0.282302	1	NA	NA	NA	NA	NA	NA	NA	NA	NA	NA	NA	NA	NA	NA	NA	NA	NA	NA	NA	NA	-0.989682	1	NA	NA
HIPK3	0.260301	3.94598e-65	NA	NA	0.511919	1	NA	NA	NA	NA	NA	NA	NA	NA	NA	NA	NA	NA	NA	NA	NA	NA	NA	NA	NA	NA	-1.35384	1	NA	NA
HIST1H1B	NA	NA	NA	NA	NA	NA	NA	NA	NA	NA	NA	NA	NA	NA	NA	NA	NA	NA	NA	NA	NA	NA	-0.348834	1	NA	NA	NA	NA	NA	NA
HIST1H1C	NA	NA	-0.260762	0.00656194	-0.377544	1	-0.636414	0.0666087	NA	NA	NA	NA	NA	NA	0.599805	4.50474e-06	0.296934	1.67017e-11	NA	NA	NA	NA	-0.51762	1	-0.5576	0.0106852	-1.92163	1	NA	NA
HIST1H1D	NA	NA	NA	NA	NA	NA	NA	NA	NA	NA	NA	NA	NA	NA	NA	NA	NA	NA	NA	NA	NA	NA	-0.402955	1	-0.310468	1	NA	NA	NA	NA
HIST1H2AC	NA	NA	NA	NA	NA	NA	-0.272574	1	NA	NA	NA	NA	NA	NA	NA	NA	NA	NA	NA	NA	NA	NA	NA	NA	-0.29679	1	-4.22863	1	NA	NA
HIST1H2AE	NA	NA	NA	NA	NA	NA	NA	NA	NA	NA	NA	NA	NA	NA	NA	NA	NA	NA	NA	NA	NA	NA	NA	NA	NA	NA	-0.940436	1	NA	NA
HIST1H2AG	NA	NA	NA	NA	NA	NA	NA	NA	NA	NA	NA	NA	NA	NA	NA	NA	NA	NA	NA	NA	NA	NA	-0.252204	1	NA	NA	NA	NA	NA	NA
HIST1H2BJ	NA	NA	NA	NA	NA	NA	NA	NA	NA	NA	NA	NA	NA	NA	NA	NA	NA	NA	NA	NA	NA	NA	NA	NA	NA	NA	-2.1999	1	NA	NA
HIST1H3H	NA	NA	NA	NA	NA	NA	NA	NA	NA	NA	NA	NA	NA	NA	NA	NA	NA	NA	NA	NA	NA	NA	NA	NA	NA	NA	-2.15937	1	NA	NA
HIST1H4C	-0.372453	9.37309e-32	-0.274022	0.0206657	-0.450315	0.754869	-1.09296	3.16101e-05	NA	NA	NA	NA	NA	NA	0.822587	1.08999e-07	NA	NA	NA	NA	-0.338691	1	-0.892578	1	-0.95869	8.2109e-05	NA	NA	NA	NA
HIST2H2AC	NA	NA	NA	NA	NA	NA	NA	NA	NA	NA	NA	NA	NA	NA	NA	NA	NA	NA	NA	NA	NA	NA	-0.266721	1	NA	NA	NA	NA	NA	NA
HIST2H2BE	NA	NA	NA	NA	NA	NA	NA	NA	NA	NA	NA	NA	NA	NA	NA	NA	NA	NA	NA	NA	NA	NA	NA	NA	-0.271467	1	-0.893768	1	NA	NA
HIST3H2A	NA	NA	-0.369223	2.64527e-05	NA	NA	NA	NA	NA	NA	NA	NA	NA	NA	NA	NA	NA	NA	NA	NA	NA	NA	NA	NA	-0.453415	0.180051	NA	NA	NA	NA
HIVEP1	NA	NA	NA	NA	NA	NA	NA	NA	NA	NA	NA	NA	NA	NA	NA	NA	NA	NA	NA	NA	NA	NA	NA	NA	NA	NA	1.40751	1	0.937922	0.00859809
HLA-A	NA	NA	NA	NA	NA	NA	NA	NA	NA	NA	NA	NA	NA	NA	NA	NA	NA	NA	NA	NA	-0.592051	4.89899e-09	NA	NA	NA	NA	-0.822872	1	-0.397246	0.422038
HLA-B	NA	NA	NA	NA	NA	NA	-0.422489	1	NA	NA	NA	NA	NA	NA	0.323708	1	NA	NA	NA	NA	NA	NA	NA	NA	NA	NA	-1.03616	1	-0.787929	1.13656e-13
HLA-C	-0.560436	1.27069e-76	-0.496619	8.34079e-08	-0.5101	0.0560745	-0.467457	0.673378	-0.275326	2.64771e-236	-0.405307	2.00121e-125	-0.307559	4.18835e-43	NA	NA	NA	NA	NA	NA	-0.467547	3.10441e-06	-0.486925	9.78017e-06	NA	NA	-1.47549	1	-0.86681	5.38823e-11
HLA-DMA	-0.944868	1.95531e-100	NA	NA	-1.45664	9.01291e-14	-0.414129	1	NA	NA	NA	NA	NA	NA	NA	NA	NA	NA	NA	NA	-0.386688	1	NA	NA	-0.911015	1.71173e-10	NA	NA	NA	NA
HLA-DMB	-0.986732	7.81467e-97	-0.448707	1	-1.21181	2.10778e-05	NA	NA	NA	NA	NA	NA	NA	NA	NA	NA	NA	NA	NA	NA	NA	NA	NA	NA	NA	NA	NA	NA	NA	NA
HLA-DOA	NA	NA	NA	NA	-0.269864	1	NA	NA	NA	NA	NA	NA	NA	NA	NA	NA	NA	NA	NA	NA	NA	NA	NA	NA	NA	NA	NA	NA	NA	NA
HLA-DPA1	-1.56631	9.71729e-141	-1.27555	7.21874e-23	-2.28144	6.82372e-19	-0.478126	1	NA	NA	-0.548857	1.55509e-50	-0.518239	2.66175e-21	NA	NA	NA	NA	-0.432003	4.75257e-26	-0.566042	0.0272665	-0.478731	1	-1.3568	9.9228e-14	NA	NA	-0.671586	1
HLA-DPB1	-1.37305	4.96921e-112	-0.997628	2.14187e-08	-2.37224	7.30951e-17	NA	NA	NA	NA	-0.496339	2.69551e-44	-0.475888	1.10954e-17	-0.329191	1	NA	NA	-0.274698	7.63891e-11	-0.553106	0.167242	-0.431424	1	-1.37316	5.64426e-13	-1.68272	1	-0.647309	0.994493
HLA-DQA1	-1.4149	7.23257e-44	-0.999167	0.00110714	-2.41241	3.00211e-16	NA	NA	NA	NA	NA	NA	NA	NA	-0.752254	1	NA	NA	-0.272616	4.57401e-07	-0.422463	1	-0.271542	1	-0.723771	5.90537e-06	-0.924523	1	NA	NA
HLA-DQA2	NA	NA	NA	NA	NA	NA	NA	NA	NA	NA	NA	NA	NA	NA	NA	NA	NA	NA	-0.275698	0.233346	NA	NA	NA	NA	NA	NA	NA	NA	NA	NA
HLA-DQB1	-1.39022	7.25006e-112	-0.771797	4.56286e-06	-2.19135	1.12895e-16	NA	NA	NA	NA	NA	NA	NA	NA	-0.320971	1	NA	NA	NA	NA	-0.502287	1	NA	NA	-0.714398	6.66735e-07	NA	NA	-0.991203	1
HLA-DRA	-1.41684	1.88454e-155	-0.362307	1	-1.92107	9.67225e-17	-0.25355	1	NA	NA	-0.502071	2.76879e-21	-0.374035	0.0940129	-0.845654	1	NA	NA	-0.336915	1.11579e-25	-0.739816	0.213294	-0.303539	1	-1.8018	1.45069e-16	NA	NA	-0.989877	1
HLA-DRB1	-1.15704	5.22619e-114	-0.367852	1	-1.80497	1.96123e-15	-0.34742	1	NA	NA	-0.416039	9.32744e-25	NA	NA	-0.335885	1	NA	NA	NA	NA	-0.367151	1	NA	NA	-1.03862	3.97657e-10	NA	NA	-0.580636	1
HLA-DRB5	NA	NA	1.10695	2.43299e-18	NA	NA	0.89484	2.80195e-10	NA	NA	-0.292212	2.8191e-13	-0.347589	1.00564e-07	-0.453232	1	NA	NA	NA	NA	-0.491054	1	NA	NA	-0.547885	0.000569841	NA	NA	NA	NA
HLA-E	-0.292993	7.01558e-26	-0.582135	9.30586e-09	NA	NA	-0.264776	1	NA	NA	NA	NA	NA	NA	NA	NA	NA	NA	NA	NA	-0.408064	1.62051e-05	NA	NA	0.258201	1	-0.352841	1	-0.365679	0.042942
HLA-F	NA	NA	NA	NA	-0.264811	1	NA	NA	NA	NA	NA	NA	NA	NA	NA	NA	NA	NA	NA	NA	-0.484204	0.259244	NA	NA	0.572767	0.0567503	-1.75876	1	-0.265875	0.269535
HLTF	NA	NA	NA	NA	NA	NA	NA	NA	NA	NA	NA	NA	NA	NA	NA	NA	NA	NA	NA	NA	NA	NA	NA	NA	-0.264527	1	NA	NA	NA	NA
HMG20B	NA	NA	NA	NA	NA	NA	NA	NA	NA	NA	NA	NA	NA	NA	NA	NA	NA	NA	NA	NA	NA	NA	NA	NA	NA	NA	-1.60506	1	NA	NA
HMGA1	-0.955526	1.38547e-89	-0.34369	0.886513	-0.641268	0.257838	NA	NA	NA	NA	NA	NA	NA	NA	NA	NA	NA	NA	NA	NA	0.268056	1	NA	NA	-0.637049	0.000323714	NA	NA	NA	NA
HMGB1	NA	NA	NA	NA	0.446664	1	NA	NA	NA	NA	NA	NA	NA	NA	NA	NA	NA	NA	NA	NA	NA	NA	NA	NA	-0.335754	1	-0.80174	1	0.271006	1
HMGB2	0.484397	5.06768e-64	-0.27419	1	0.719663	1	-0.385172	1	NA	NA	NA	NA	NA	NA	-0.378461	1	NA	NA	NA	NA	NA	NA	NA	NA	-0.426706	0.00427815	NA	NA	NA	NA
HMGB3	NA	NA	NA	NA	0.303199	1	NA	NA	NA	NA	NA	NA	NA	NA	NA	NA	NA	NA	NA	NA	NA	NA	NA	NA	-0.269606	1	NA	NA	NA	NA
HMGCS1	NA	NA	NA	NA	NA	NA	NA	NA	NA	NA	NA	NA	NA	NA	-0.348277	1	NA	NA	NA	NA	NA	NA	NA	NA	NA	NA	NA	NA	NA	NA
HMGN1	NA	NA	NA	NA	-0.305301	1	NA	NA	NA	NA	NA	NA	NA	NA	NA	NA	NA	NA	NA	NA	NA	NA	NA	NA	-0.564863	2.25282e-05	-0.685806	1	NA	NA
HMGN2	0.439454	3.72638e-18	-0.331307	1	1.26244	0.00123451	NA	NA	NA	NA	NA	NA	NA	NA	NA	NA	NA	NA	NA	NA	NA	NA	NA	NA	NA	NA	1.29716	1	-0.332436	1
HMGN3	-0.320452	6.62482e-56	NA	NA	NA	NA	-0.25058	1	NA	NA	NA	NA	NA	NA	NA	NA	-0.364575	5.26768e-22	NA	NA	NA	NA	NA	NA	-0.911395	7.41867e-09	NA	NA	NA	NA
HNMT	-0.38418	3.37987e-30	NA	NA	NA	NA	NA	NA	NA	NA	NA	NA	NA	NA	NA	NA	NA	NA	NA	NA	NA	NA	NA	NA	NA	NA	NA	NA	NA	NA
HNRNPA0	NA	NA	-0.263322	0.683079	-0.258589	1	-0.429651	1	NA	NA	NA	NA	NA	NA	NA	NA	NA	NA	NA	NA	NA	NA	NA	NA	NA	NA	1.65899	1	NA	NA
HNRNPA1	NA	NA	-0.497676	0.00207192	NA	NA	NA	NA	NA	NA	0.251929	2.9667e-53	NA	NA	0.480781	0.0210059	0.253263	1.89838e-14	0.344312	1.21612e-19	NA	NA	NA	NA	NA	NA	1.63699	1	NA	NA
HNRNPA2B1	0.472476	3.647e-47	0.274904	1	0.539521	1	NA	NA	NA	NA	NA	NA	NA	NA	-0.711489	1.07541e-06	NA	NA	NA	NA	NA	NA	NA	NA	-0.40373	0.546816	0.823486	1	0.349692	1
HNRNPA3	NA	NA	0.277451	1	0.327498	1	-0.267717	1	NA	NA	NA	NA	NA	NA	NA	NA	NA	NA	NA	NA	NA	NA	NA	NA	-0.463747	1	2.45322	1	0.258332	1
HNRNPC	NA	NA	NA	NA	0.738216	0.000222548	NA	NA	NA	NA	NA	NA	NA	NA	NA	NA	NA	NA	NA	NA	NA	NA	NA	NA	NA	NA	-0.322902	1	NA	NA
HNRNPD	0.315367	9.15377e-34	0.363236	0.516801	0.507678	1	0.279912	1	NA	NA	NA	NA	NA	NA	NA	NA	NA	NA	NA	NA	NA	NA	NA	NA	-0.325569	0.00147977	1.89257	1	NA	NA
HNRNPF	NA	NA	NA	NA	NA	NA	NA	NA	NA	NA	NA	NA	NA	NA	NA	NA	NA	NA	NA	NA	NA	NA	NA	NA	NA	NA	-1.5914	1	NA	NA
HNRNPH2	NA	NA	NA	NA	0.375145	1	NA	NA	NA	NA	NA	NA	NA	NA	NA	NA	NA	NA	NA	NA	NA	NA	NA	NA	-0.298942	0.0317906	NA	NA	NA	NA
HNRNPK	0.317068	4.6126e-23	0.339937	0.977657	0.529209	0.371751	NA	NA	NA	NA	NA	NA	NA	NA	NA	NA	NA	NA	NA	NA	NA	NA	NA	NA	-0.36453	1	-0.541943	1	NA	NA
HNRNPLL	NA	NA	NA	NA	NA	NA	NA	NA	NA	NA	NA	NA	NA	NA	NA	NA	NA	NA	NA	NA	NA	NA	NA	NA	NA	NA	-0.968695	1	NA	NA
HNRNPR	0.294047	1.05958e-44	0.358615	1	0.479873	1	NA	NA	NA	NA	NA	NA	NA	NA	NA	NA	NA	NA	NA	NA	NA	NA	NA	NA	-0.332412	0.736657	1.0724	1	NA	NA
HNRNPU	0.787412	2.18593e-66	0.477486	0.0632641	0.588622	1	NA	NA	NA	NA	NA	NA	NA	NA	-0.464232	1	NA	NA	NA	NA	NA	NA	NA	NA	-0.349924	1	2.01388	1	NA	NA
HNRNPUL1	NA	NA	NA	NA	-0.300164	1	NA	NA	NA	NA	NA	NA	NA	NA	NA	NA	NA	NA	NA	NA	NA	NA	NA	NA	NA	NA	1.11377	1	0.611519	0.126736
HOMER2	NA	NA	NA	NA	NA	NA	NA	NA	NA	NA	NA	NA	NA	NA	NA	NA	NA	NA	NA	NA	NA	NA	NA	NA	NA	NA	-1.98277	1	NA	NA
HOOK3	0.363636	1.22811e-69	NA	NA	NA	NA	NA	NA	NA	NA	NA	NA	NA	NA	-0.269865	1	NA	NA	NA	NA	NA	NA	NA	NA	NA	NA	-0.707108	1	0.483176	1
HOPX	NA	NA	NA	NA	NA	NA	NA	NA	NA	NA	NA	NA	NA	NA	-0.333665	1	-0.282312	2.03478e-06	NA	NA	NA	NA	NA	NA	-0.785512	0.0218173	NA	NA	NA	NA
HOTAIRM1	-0.877786	2.66262e-93	-0.807598	9.05217e-16	-0.602911	0.0682727	NA	NA	NA	NA	NA	NA	NA	NA	NA	NA	NA	NA	NA	NA	NA	NA	NA	NA	NA	NA	-1.2841	1	NA	NA
HOXA10	NA	NA	NA	NA	NA	NA	NA	NA	NA	NA	NA	NA	NA	NA	NA	NA	NA	NA	NA	NA	NA	NA	NA	NA	-0.321207	1	NA	NA	NA	NA
HOXA9	NA	NA	NA	NA	NA	NA	NA	NA	NA	NA	NA	NA	NA	NA	NA	NA	NA	NA	NA	NA	NA	NA	NA	NA	-0.406877	0.00541605	NA	NA	NA	NA
HP1BP3	NA	NA	NA	NA	NA	NA	NA	NA	NA	NA	NA	NA	NA	NA	-0.442851	1	NA	NA	NA	NA	NA	NA	NA	NA	NA	NA	1.39771	1	NA	NA
HPCAL1	NA	NA	NA	NA	NA	NA	NA	NA	NA	NA	NA	NA	NA	NA	NA	NA	NA	NA	NA	NA	NA	NA	NA	NA	NA	NA	-1.40929	1	NA	NA
HPSE	-0.26714	1.44653e-33	0.554846	7.88011e-14	NA	NA	NA	NA	NA	NA	NA	NA	NA	NA	NA	NA	NA	NA	NA	NA	NA	NA	NA	NA	NA	NA	-1.5735	1	NA	NA
HS3ST3B1	NA	NA	-0.330268	0.0349334	NA	NA	NA	NA	NA	NA	NA	NA	NA	NA	NA	NA	NA	NA	NA	NA	NA	NA	NA	NA	NA	NA	NA	NA	NA	NA
HSBP1	0.366645	2.63618e-55	0.40649	0.0972183	0.710086	0.00136788	NA	NA	NA	NA	NA	NA	NA	NA	NA	NA	NA	NA	NA	NA	0.298948	1	NA	NA	-0.476932	0.000471324	-1.20541	1	NA	NA
HSD17B11	-0.344192	5.60045e-56	NA	NA	NA	NA	NA	NA	NA	NA	NA	NA	NA	NA	NA	NA	NA	NA	NA	NA	NA	NA	NA	NA	-0.717797	5.0858e-05	NA	NA	NA	NA
HSD17B12	NA	NA	NA	NA	NA	NA	NA	NA	NA	NA	NA	NA	NA	NA	NA	NA	NA	NA	NA	NA	0.280223	0.821216	NA	NA	-0.459246	3.4729e-05	0.364401	1	NA	NA
HSH2D	NA	NA	-0.337323	1	-0.258401	1	NA	NA	NA	NA	NA	NA	NA	NA	NA	NA	NA	NA	NA	NA	NA	NA	NA	NA	NA	NA	NA	NA	NA	NA
HSP90AB1	NA	NA	NA	NA	0.306559	1	0.261838	1	0.265449	1.2191e-123	NA	NA	NA	NA	NA	NA	NA	NA	NA	NA	NA	NA	NA	NA	-0.488479	0.0714149	1.37616	1	NA	NA
HSPA1A	-0.73723	8.50385e-20	-0.68881	1	-0.601687	1	NA	NA	NA	NA	NA	NA	NA	NA	NA	NA	NA	NA	NA	NA	NA	NA	NA	NA	NA	NA	NA	NA	NA	NA
HSPA1B	-0.545475	1.44659e-06	-0.431642	1	-0.369412	1	0.491351	1	NA	NA	NA	NA	NA	NA	NA	NA	NA	NA	NA	NA	NA	NA	NA	NA	NA	NA	NA	NA	NA	NA
HSPA6	-0.254685	3.44591e-07	NA	NA	NA	NA	NA	NA	NA	NA	NA	NA	NA	NA	NA	NA	NA	NA	NA	NA	NA	NA	NA	NA	NA	NA	NA	NA	NA	NA
HSPA8	-0.409335	2.3302e-48	-1.17367	8.62594e-17	-0.684683	1	NA	NA	-0.370677	2.3117e-230	-0.278814	3.05054e-58	NA	NA	NA	NA	NA	NA	NA	NA	-0.500941	0.00051529	-0.399722	0.00596932	NA	NA	-0.323939	1	NA	NA
HSPB1	0.519881	2.82226e-95	0.375486	1	1.15324	2.97517e-07	NA	NA	NA	NA	NA	NA	NA	NA	NA	NA	NA	NA	NA	NA	NA	NA	0.250691	1	NA	NA	-1.01495	1	NA	NA
HSPH1	NA	NA	-0.401048	1	NA	NA	0.337813	1	NA	NA	NA	NA	NA	NA	NA	NA	NA	NA	NA	NA	NA	NA	-0.250331	1	0.298413	1	NA	NA	0.674637	1
HTATIP2	NA	NA	NA	NA	NA	NA	NA	NA	NA	NA	NA	NA	NA	NA	NA	NA	NA	NA	NA	NA	NA	NA	NA	NA	NA	NA	-1.57052	1	NA	NA
HTR1F	NA	NA	NA	NA	NA	NA	NA	NA	NA	NA	NA	NA	NA	NA	NA	NA	NA	NA	NA	NA	NA	NA	NA	NA	-0.538228	4.94701e-09	NA	NA	NA	NA
IAH1	NA	NA	-0.314437	0.667837	NA	NA	NA	NA	NA	NA	NA	NA	NA	NA	NA	NA	NA	NA	NA	NA	NA	NA	NA	NA	NA	NA	0.891388	1	NA	NA
ICA1	NA	NA	NA	NA	NA	NA	NA	NA	NA	NA	NA	NA	NA	NA	NA	NA	NA	NA	NA	NA	NA	NA	NA	NA	-0.286175	0.0681663	NA	NA	NA	NA
ICAM1	-0.952892	1.38539e-82	-0.754072	0.00421109	NA	NA	-0.516654	1	NA	NA	NA	NA	NA	NA	NA	NA	NA	NA	NA	NA	NA	NA	NA	NA	-0.410369	0.55374	NA	NA	NA	NA
ICAM2	NA	NA	-0.285209	1	NA	NA	0.253509	1	NA	NA	NA	NA	NA	NA	0.282571	1	NA	NA	NA	NA	NA	NA	NA	NA	NA	NA	-2.55472	1	NA	NA
ICAM3	-0.287423	8.59801e-62	-0.584007	0.0053376	-0.979299	0.000723617	NA	NA	NA	NA	NA	NA	NA	NA	NA	NA	NA	NA	NA	NA	NA	NA	NA	NA	-0.390006	0.0551357	NA	NA	NA	NA
ICAM4	NA	NA	-0.267127	1	NA	NA	NA	NA	NA	NA	NA	NA	NA	NA	NA	NA	NA	NA	NA	NA	NA	NA	NA	NA	NA	NA	NA	NA	NA	NA
ICE1	NA	NA	NA	NA	NA	NA	0.358376	1	NA	NA	NA	NA	NA	NA	-0.261623	1	NA	NA	NA	NA	NA	NA	NA	NA	NA	NA	1.11452	1	0.917623	0.0204023
ICE2	NA	NA	NA	NA	NA	NA	NA	NA	NA	NA	NA	NA	NA	NA	NA	NA	NA	NA	NA	NA	NA	NA	NA	NA	-0.296852	1	NA	NA	NA	NA
ICOS	NA	NA	NA	NA	NA	NA	NA	NA	NA	NA	NA	NA	0.566057	1.28537e-17	-0.435644	1	NA	NA	NA	NA	NA	NA	0.391128	1	0.558934	1	NA	NA	0.563637	1
ICOSLG	NA	NA	NA	NA	NA	NA	-0.509156	1	NA	NA	NA	NA	NA	NA	NA	NA	NA	NA	NA	NA	NA	NA	NA	NA	NA	NA	NA	NA	NA	NA
ID1	NA	NA	NA	NA	0.382367	1	-1.05593	1	NA	NA	NA	NA	-0.524686	1.08081e-09	NA	NA	NA	NA	NA	NA	NA	NA	NA	NA	-2.24242	2.40841e-09	NA	NA	NA	NA
ID2	-0.850551	5.70517e-57	-0.393234	1	-1.23277	1	-0.479594	1	NA	NA	NA	NA	-0.328289	1.18918e-08	-0.308814	1	NA	NA	NA	NA	NA	NA	NA	NA	NA	NA	-1.12377	1	NA	NA
ID3	NA	NA	NA	NA	NA	NA	-0.342998	1	NA	NA	NA	NA	NA	NA	NA	NA	NA	NA	-0.504993	6.1305e-08	NA	NA	0.35891	1	-0.672906	1	NA	NA	NA	NA
IDH2	NA	NA	NA	NA	NA	NA	NA	NA	NA	NA	NA	NA	NA	NA	NA	NA	NA	NA	NA	NA	NA	NA	NA	NA	-0.489034	6.93586e-05	-0.875568	1	NA	NA
IDH3G	NA	NA	NA	NA	NA	NA	-0.296133	1	NA	NA	NA	NA	NA	NA	0.287655	1	NA	NA	NA	NA	NA	NA	NA	NA	NA	NA	NA	NA	NA	NA
IDI1	0.548154	4.33627e-74	0.411656	1	NA	NA	-0.599269	1	-0.349742	2.04631e-121	-0.484933	7.60116e-92	-0.302038	3.00048e-13	-0.741044	0.00194336	-0.459756	7.37876e-38	-0.359024	1.36315e-07	NA	NA	NA	NA	NA	NA	1.03574	1	NA	NA
IDS	-0.604019	8.1201e-65	-0.776574	1.30524e-07	-1.03748	0.00415333	-0.652217	1	NA	NA	NA	NA	NA	NA	NA	NA	NA	NA	NA	NA	NA	NA	NA	NA	-0.85004	0.0252829	NA	NA	-0.555161	1
IER2	-0.601428	2.93645e-32	-0.76166	0.0930713	-0.888255	1	NA	NA	NA	NA	-0.304144	5.7654e-26	-0.363525	3.85826e-28	NA	NA	-0.506537	9.11228e-43	NA	NA	NA	NA	-0.31948	1	NA	NA	0.759857	1	NA	NA
IER3	-1.81552	3.49717e-179	-1.14909	1.08608e-10	NA	NA	-0.321893	1	NA	NA	NA	NA	NA	NA	NA	NA	NA	NA	NA	NA	NA	NA	NA	NA	-0.917368	0.000482733	NA	NA	-0.712928	1
IER5	-0.364382	3.56891e-37	-0.558926	0.0506739	NA	NA	NA	NA	NA	NA	NA	NA	-0.287241	2.71569e-09	NA	NA	-0.376908	2.55038e-16	NA	NA	NA	NA	NA	NA	NA	NA	NA	NA	NA	NA
IER5L	NA	NA	NA	NA	NA	NA	NA	NA	NA	NA	-0.356108	8.28982e-26	-0.533728	1.16797e-16	NA	NA	NA	NA	NA	NA	NA	NA	NA	NA	NA	NA	NA	NA	NA	NA
IFI27	NA	NA	-0.346382	1	NA	NA	NA	NA	NA	NA	NA	NA	NA	NA	NA	NA	NA	NA	NA	NA	NA	NA	NA	NA	NA	NA	NA	NA	NA	NA
IFI27L1	NA	NA	NA	NA	NA	NA	NA	NA	NA	NA	NA	NA	NA	NA	NA	NA	NA	NA	NA	NA	0.379659	0.179543	0.294054	1	-0.290596	1	NA	NA	NA	NA
IFI27L2	0.342022	2.75722e-64	0.510602	8.13098e-05	0.326572	1	NA	NA	NA	NA	NA	NA	NA	NA	NA	NA	NA	NA	NA	NA	NA	NA	0.277818	1	NA	NA	-0.829035	1	NA	NA
IFI30	-0.296538	2.83634e-37	-0.750892	0.00958206	-0.331908	1	NA	NA	NA	NA	NA	NA	NA	NA	NA	NA	NA	NA	NA	NA	NA	NA	NA	NA	NA	NA	NA	NA	NA	NA
IFI44	-0.501514	1.09788e-33	-0.328496	1	NA	NA	-0.309362	0.458129	NA	NA	NA	NA	NA	NA	NA	NA	NA	NA	NA	NA	NA	NA	NA	NA	-0.285931	1	1.73572	1	NA	NA
IFI44L	-0.742465	1.33082e-50	-0.536736	0.00309351	-0.753514	0.0146088	-0.751054	0.220007	NA	NA	NA	NA	NA	NA	NA	NA	NA	NA	NA	NA	NA	NA	NA	NA	-0.400183	0.660767	2.16854	1	0.738435	1
IFI6	-1.0154	3.45488e-93	-0.50118	0.0865391	-0.460776	1	NA	NA	NA	NA	NA	NA	NA	NA	NA	NA	0.276108	2.30237e-09	NA	NA	NA	NA	NA	NA	-0.568248	0.056426	0.622453	1	NA	NA
IFIH1	NA	NA	-0.270501	1	NA	NA	NA	NA	NA	NA	NA	NA	NA	NA	NA	NA	NA	NA	NA	NA	NA	NA	NA	NA	NA	NA	NA	NA	NA	NA
IFIT2	NA	NA	-1.16138	0.00738281	NA	NA	-0.263034	1	NA	NA	NA	NA	NA	NA	-0.258498	1	NA	NA	NA	NA	NA	NA	NA	NA	NA	NA	NA	NA	NA	NA
IFIT3	NA	NA	-0.606583	0.00108239	NA	NA	NA	NA	NA	NA	NA	NA	NA	NA	NA	NA	NA	NA	NA	NA	NA	NA	NA	NA	-0.270498	1	NA	NA	NA	NA
IFITM1	NA	NA	-0.458881	0.0019061	-0.3248	1	0.301404	1	0.369699	3.23461e-90	NA	NA	NA	NA	0.828955	9.00688e-06	NA	NA	NA	NA	NA	NA	NA	NA	0.584444	1	NA	NA	NA	NA
IFITM3	-0.631528	7.0613e-29	0.509533	1	NA	NA	NA	NA	NA	NA	NA	NA	NA	NA	NA	NA	0.278924	2.3829e-08	NA	NA	NA	NA	NA	NA	-0.524284	0.196062	0.47123	1	NA	NA
IFNGR2	-0.562044	1.25418e-63	NA	NA	0.822521	0.00368755	NA	NA	NA	NA	NA	NA	NA	NA	NA	NA	NA	NA	NA	NA	NA	NA	NA	NA	-0.318452	1	NA	NA	NA	NA
IFRD1	NA	NA	NA	NA	-0.563376	1	-0.622337	1	NA	NA	-0.266964	2.61212e-25	-0.501038	5.18265e-23	NA	NA	-0.460942	4.32415e-24	NA	NA	NA	NA	NA	NA	NA	NA	-0.279691	1	-0.521301	1
IFT57	0.318591	9.461e-79	NA	NA	NA	NA	NA	NA	NA	NA	NA	NA	NA	NA	NA	NA	NA	NA	NA	NA	NA	NA	NA	NA	-0.365136	0.277108	NA	NA	NA	NA
IGBP1	-0.262622	3.12348e-54	-0.407547	0.0518356	-0.343398	1	-0.423889	1	NA	NA	NA	NA	NA	NA	NA	NA	NA	NA	NA	NA	-0.267131	1	-0.395053	0.0306828	NA	NA	NA	NA	NA	NA
IGF2BP2	NA	NA	NA	NA	NA	NA	NA	NA	NA	NA	NA	NA	NA	NA	NA	NA	NA	NA	NA	NA	NA	NA	NA	NA	-0.567112	0.000207649	NA	NA	NA	NA
IGFBP7	0.28994	2.93863e-54	0.253328	0.0128623	0.386158	1	NA	NA	NA	NA	NA	NA	NA	NA	0.319215	1	NA	NA	NA	NA	NA	NA	NA	NA	-0.856057	5.20581e-11	NA	NA	NA	NA
IGHM	NA	NA	NA	NA	NA	NA	-0.58657	0.0345622	NA	NA	NA	NA	NA	NA	-0.261002	0.350533	NA	NA	NA	NA	NA	NA	NA	NA	-0.30691	1	NA	NA	NA	NA
IGKC	-0.563757	1.40281e-52	-0.388806	0.00632473	NA	NA	-2.31706	3.23215e-06	NA	NA	NA	NA	NA	NA	7.90116	9.94521e-28	0.415376	1.8495e-47	-0.283928	1.43797e-05	1.13422	1	NA	NA	NA	NA	NA	NA	NA	NA
IGLC2	-0.356353	1.17211e-29	NA	NA	NA	NA	NA	NA	NA	NA	NA	NA	NA	NA	3.37672	0.000552314	NA	NA	NA	NA	NA	NA	NA	NA	NA	NA	NA	NA	NA	NA
IGLL5	-0.618573	9.49174e-174	0.355298	8.13196e-12	-0.925284	0.0337765	NA	NA	NA	NA	NA	NA	NA	NA	-3.5426	1	NA	NA	NA	NA	NA	NA	NA	NA	NA	NA	NA	NA	NA	NA
IK	NA	NA	NA	NA	0.453542	1	NA	NA	NA	NA	NA	NA	NA	NA	NA	NA	NA	NA	NA	NA	NA	NA	NA	NA	-0.263504	0.091851	2.75938	1	0.360649	1
IKBKG	NA	NA	NA	NA	NA	NA	NA	NA	NA	NA	NA	NA	NA	NA	NA	NA	NA	NA	NA	NA	NA	NA	NA	NA	NA	NA	-1.56214	1	NA	NA
IKZF1	NA	NA	NA	NA	-0.486986	1	NA	NA	NA	NA	NA	NA	NA	NA	NA	NA	NA	NA	NA	NA	NA	NA	NA	NA	0.931461	7.35137e-06	1.90408	1	1.04199	1.80682e-11
IKZF3	NA	NA	NA	NA	NA	NA	NA	NA	NA	NA	NA	NA	NA	NA	-0.442675	1	NA	NA	NA	NA	NA	NA	NA	NA	NA	NA	NA	NA	NA	NA
IL10RA	-0.683533	1.39819e-75	-0.586942	7.18494e-06	NA	NA	-0.487008	1	NA	NA	NA	NA	NA	NA	NA	NA	NA	NA	NA	NA	0.254659	1	NA	NA	NA	NA	1.11452	1	NA	NA
IL10RB-DT	-0.356807	9.39125e-39	-0.305821	3.95931e-05	NA	NA	NA	NA	NA	NA	NA	NA	NA	NA	NA	NA	NA	NA	NA	NA	NA	NA	NA	NA	NA	NA	NA	NA	NA	NA
IL13RA1	-0.303368	8.44361e-41	NA	NA	NA	NA	NA	NA	NA	NA	NA	NA	NA	NA	NA	NA	NA	NA	NA	NA	NA	NA	NA	NA	NA	NA	NA	NA	NA	NA
IL17RA	0.605948	5.78927e-94	0.390246	1.5234e-06	0.711271	0.000172354	-0.360703	1	NA	NA	NA	NA	NA	NA	NA	NA	NA	NA	NA	NA	NA	NA	NA	NA	NA	NA	NA	NA	NA	NA
IL18	-0.343837	4.01229e-18	-0.37558	1	-0.522366	1	NA	NA	NA	NA	NA	NA	NA	NA	NA	NA	NA	NA	NA	NA	NA	NA	NA	NA	-0.80114	2.93012e-07	NA	NA	NA	NA
IL1A	-1.45595	1.64744e-73	-0.872251	0.0182179	0.415881	1	NA	NA	NA	NA	NA	NA	NA	NA	NA	NA	NA	NA	NA	NA	NA	NA	NA	NA	NA	NA	NA	NA	NA	NA
IL1B	-2.31583	1.2363e-183	-1.81357	2.0987e-11	NA	NA	-1.72537	1	NA	NA	NA	NA	NA	NA	NA	NA	NA	NA	NA	NA	NA	NA	NA	NA	-0.717932	0.258488	NA	NA	NA	NA
IL1R1	-0.362025	2.86133e-30	NA	NA	NA	NA	NA	NA	NA	NA	NA	NA	NA	NA	NA	NA	NA	NA	NA	NA	NA	NA	NA	NA	NA	NA	NA	NA	NA	NA
IL1R2	NA	NA	NA	NA	-0.820529	0.989277	NA	NA	NA	NA	NA	NA	NA	NA	NA	NA	NA	NA	NA	NA	NA	NA	NA	NA	NA	NA	NA	NA	NA	NA
IL1RN	-1.66568	6.67154e-101	-0.969338	0.000507828	-0.575104	1	NA	NA	NA	NA	NA	NA	NA	NA	NA	NA	NA	NA	NA	NA	NA	NA	NA	NA	NA	NA	NA	NA	NA	NA
IL27RA	0.321948	8.86869e-57	0.392995	2.55061e-07	0.435892	0.112489	NA	NA	NA	NA	NA	NA	-0.255007	4.01971e-10	-0.357156	1	NA	NA	NA	NA	NA	NA	NA	NA	0.330377	1	1.11452	1	NA	NA
IL2RG	NA	NA	0.311472	1	-0.532164	1	NA	NA	NA	NA	NA	NA	NA	NA	NA	NA	NA	NA	NA	NA	NA	NA	NA	NA	0.347954	0.230097	0.255698	1	NA	NA
IL32	0.270771	1	0.291796	1	NA	NA	NA	NA	0.282893	0.000531021	NA	NA	NA	NA	-0.538705	1	NA	NA	-0.277449	1	NA	NA	0.519116	1	0.653334	1	-1.25011	1	NA	NA
IL3RA	-0.31043	8.081e-16	-0.306126	1	-0.29562	1	NA	NA	NA	NA	NA	NA	NA	NA	NA	NA	NA	NA	NA	NA	NA	NA	NA	NA	NA	NA	NA	NA	NA	NA
IL4I1	NA	NA	0.303327	1.36015e-08	-0.456303	1	NA	NA	NA	NA	NA	NA	NA	NA	NA	NA	NA	NA	NA	NA	NA	NA	NA	NA	NA	NA	NA	NA	NA	NA
IL4R	NA	NA	0.257219	0.141445	NA	NA	0.344817	1	0.263452	1.1543e-52	NA	NA	NA	NA	NA	NA	NA	NA	NA	NA	NA	NA	NA	NA	0.58663	1	NA	NA	1.17784	3.04854e-07
IL6	-0.983918	1.7745e-17	-1.16847	1	NA	NA	NA	NA	NA	NA	NA	NA	NA	NA	NA	NA	NA	NA	0.28034	0.0524657	NA	NA	NA	NA	NA	NA	NA	NA	NA	NA
IL6ST	NA	NA	0.321219	0.810469	NA	NA	NA	NA	NA	NA	NA	NA	NA	NA	-0.442088	1	NA	NA	NA	NA	NA	NA	NA	NA	0.594998	1	NA	NA	0.688762	0.191376
IL7R	0.346771	1	NA	NA	-0.608168	1	0.476859	1	NA	NA	0.333929	5.26943e-49	0.44546	2.20953e-30	NA	NA	0.809044	2.67709e-21	NA	NA	NA	NA	0.74755	0.217939	1.23073	7.44151e-09	1.98089	1	0.448046	1
ILF2	NA	NA	NA	NA	NA	NA	NA	NA	NA	NA	NA	NA	NA	NA	NA	NA	NA	NA	NA	NA	NA	NA	NA	NA	-0.466946	0.0121514	1.21965	1	NA	NA
ILF3	NA	NA	NA	NA	0.457018	1	0.297081	1	NA	NA	NA	NA	NA	NA	NA	NA	NA	NA	NA	NA	NA	NA	NA	NA	NA	NA	2.38332	1	0.741477	0.00157633
ILF3-DT	-0.472898	7.01575e-43	-0.469107	7.86641e-08	NA	NA	-0.263238	1	NA	NA	NA	NA	NA	NA	NA	NA	NA	NA	NA	NA	NA	NA	NA	NA	-0.255561	1	NA	NA	NA	NA
ILK	NA	NA	0.304399	1	NA	NA	NA	NA	NA	NA	NA	NA	NA	NA	NA	NA	NA	NA	NA	NA	NA	NA	NA	NA	NA	NA	-2.26979	1	NA	NA
IMP3	NA	NA	NA	NA	NA	NA	NA	NA	NA	NA	NA	NA	NA	NA	NA	NA	NA	NA	NA	NA	NA	NA	NA	NA	NA	NA	-0.639933	1	NA	NA
IMPDH2	NA	NA	NA	NA	NA	NA	NA	NA	NA	NA	NA	NA	NA	NA	0.254268	1	NA	NA	NA	NA	NA	NA	NA	NA	-0.59724	0.0196551	1.05588	1	NA	NA
INAFM2	NA	NA	NA	NA	NA	NA	NA	NA	NA	NA	NA	NA	NA	NA	NA	NA	NA	NA	NA	NA	NA	NA	NA	NA	-0.448594	0.00295527	-1.94856	1	NA	NA
ING1	NA	NA	NA	NA	-0.265558	1	NA	NA	NA	NA	NA	NA	NA	NA	NA	NA	NA	NA	NA	NA	NA	NA	NA	NA	NA	NA	1.21965	1	NA	NA
ING3	NA	NA	NA	NA	0.350544	1	NA	NA	NA	NA	NA	NA	NA	NA	NA	NA	NA	NA	NA	NA	NA	NA	NA	NA	-0.250285	0.489041	1.65899	1	0.269644	1
INHBA	-0.571525	5.32665e-10	-0.676125	1	-0.366793	1	NA	NA	NA	NA	NA	NA	NA	NA	NA	NA	NA	NA	NA	NA	NA	NA	NA	NA	NA	NA	NA	NA	NA	NA
INKA1	NA	NA	NA	NA	NA	NA	NA	NA	NA	NA	NA	NA	NA	NA	NA	NA	NA	NA	NA	NA	NA	NA	NA	NA	NA	NA	-1.05339	1	NA	NA
INO80D	NA	NA	NA	NA	NA	NA	-0.351033	1	NA	NA	NA	NA	NA	NA	NA	NA	NA	NA	NA	NA	NA	NA	NA	NA	NA	NA	0.366336	1	0.613955	1
INPP4A	NA	NA	NA	NA	NA	NA	-0.291406	1	NA	NA	NA	NA	NA	NA	NA	NA	NA	NA	NA	NA	NA	NA	NA	NA	0.253981	1	0.295171	1	0.339998	1
INPP5D	NA	NA	-0.310606	0.154759	0.25117	1	NA	NA	NA	NA	NA	NA	NA	NA	NA	NA	NA	NA	NA	NA	NA	NA	NA	NA	NA	NA	1.53338	1	0.529095	1
INSIG1	NA	NA	NA	NA	-0.712175	1	NA	NA	NA	NA	NA	NA	NA	NA	NA	NA	NA	NA	NA	NA	NA	NA	NA	NA	-0.587415	0.00504508	0.384495	1	-0.300934	1
INTS6	NA	NA	NA	NA	NA	NA	-0.336416	1	NA	NA	-0.265634	8.39528e-38	NA	NA	-0.483777	1	-0.335254	5.75336e-16	NA	NA	NA	NA	-0.37911	1	NA	NA	NA	NA	NA	NA
IP6K2	NA	NA	NA	NA	NA	NA	-0.273367	1	NA	NA	NA	NA	NA	NA	NA	NA	NA	NA	NA	NA	NA	NA	NA	NA	-0.28839	1	NA	NA	NA	NA
IPO9	NA	NA	NA	NA	NA	NA	NA	NA	NA	NA	NA	NA	NA	NA	NA	NA	NA	NA	NA	NA	NA	NA	NA	NA	-0.314428	0.0638594	1.43548	1	0.302422	1
IQGAP2	0.285603	2.0271e-41	NA	NA	NA	NA	NA	NA	NA	NA	NA	NA	NA	NA	-0.290594	1	NA	NA	NA	NA	NA	NA	NA	NA	-0.824852	8.67233e-07	-0.568604	1	0.439483	1
IQSEC1	-0.265798	4.19308e-59	-0.429331	0.0201861	NA	NA	NA	NA	NA	NA	NA	NA	NA	NA	NA	NA	NA	NA	NA	NA	NA	NA	NA	NA	NA	NA	1.88458	1	0.250877	1
IRAK1	-0.295433	4.73922e-60	NA	NA	0.257593	1	NA	NA	NA	NA	NA	NA	NA	NA	NA	NA	NA	NA	NA	NA	NA	NA	NA	NA	NA	NA	NA	NA	NA	NA
IRAK2	-0.616445	3.72317e-49	NA	NA	NA	NA	NA	NA	NA	NA	NA	NA	NA	NA	NA	NA	NA	NA	NA	NA	NA	NA	NA	NA	NA	NA	NA	NA	NA	NA
IRAK3	NA	NA	-0.28431	1	0.855429	0.0144942	NA	NA	NA	NA	NA	NA	NA	NA	NA	NA	NA	NA	NA	NA	NA	NA	NA	NA	-0.588439	6.36891e-06	NA	NA	NA	NA
IRAK4	NA	NA	NA	NA	NA	NA	-0.302247	0.458129	NA	NA	NA	NA	NA	NA	NA	NA	NA	NA	NA	NA	NA	NA	NA	NA	NA	NA	NA	NA	NA	NA
IRF1	0.425882	7.85494e-50	-0.347653	1	NA	NA	NA	NA	NA	NA	-0.320812	1.29158e-61	-0.447347	1.89985e-25	-0.711495	9.51994e-05	-0.43287	2.64337e-35	0.364223	0.221481	-0.361068	1	NA	NA	0.299583	1	0.433373	1	NA	NA
IRF2	NA	NA	0.266423	1	0.507862	2.36768e-05	NA	NA	NA	NA	NA	NA	NA	NA	NA	NA	NA	NA	NA	NA	NA	NA	NA	NA	NA	NA	-0.867942	1	NA	NA
IRF2BP2	-0.507492	1.54269e-56	NA	NA	-0.633618	1	NA	NA	NA	NA	NA	NA	NA	NA	NA	NA	NA	NA	NA	NA	NA	NA	NA	NA	0.293378	1	1.29028	1	0.422521	0.497771
IRF2BPL	-0.292073	5.74704e-33	-0.358249	1	NA	NA	NA	NA	NA	NA	NA	NA	NA	NA	-0.274672	1	NA	NA	NA	NA	NA	NA	NA	NA	NA	NA	1.61653	1	NA	NA
IRF4	NA	NA	NA	NA	-0.292437	1	NA	NA	NA	NA	NA	NA	NA	NA	NA	NA	NA	NA	NA	NA	0.466029	1	NA	NA	NA	NA	NA	NA	NA	NA
IRF7	-0.39784	7.66341e-39	-0.529384	0.433916	-0.569035	1	-0.464728	1	NA	NA	NA	NA	NA	NA	NA	NA	NA	NA	NA	NA	NA	NA	NA	NA	NA	NA	1.05588	1	NA	NA
IRF8	NA	NA	-0.338304	1	-0.578862	1	NA	NA	NA	NA	NA	NA	NA	NA	NA	NA	NA	NA	NA	NA	NA	NA	NA	NA	NA	NA	NA	NA	NA	NA
IRF9	0.290752	7.22292e-48	NA	NA	NA	NA	NA	NA	NA	NA	NA	NA	NA	NA	-0.519808	1	NA	NA	NA	NA	NA	NA	NA	NA	NA	NA	1.84649	1	NA	NA
IRS2	NA	NA	-0.599657	0.0143935	0.274794	1	0.451828	1	NA	NA	NA	NA	NA	NA	NA	NA	NA	NA	NA	NA	NA	NA	NA	NA	0.266968	1	NA	NA	NA	NA
ISCA1	NA	NA	NA	NA	NA	NA	NA	NA	NA	NA	NA	NA	NA	NA	NA	NA	NA	NA	NA	NA	NA	NA	NA	NA	0.692263	0.00390984	-2.28597	1	NA	NA
ISG15	-1.1709	6.03602e-82	-1.00624	1.4486e-10	-1.40209	1	NA	NA	NA	NA	NA	NA	NA	NA	-0.51236	1	NA	NA	NA	NA	-0.297396	1	NA	NA	0.327387	1	NA	NA	-0.532313	1
ISG20	-0.431615	2.6049e-13	-1.07697	2.02752e-12	-0.965811	0.0255283	NA	NA	NA	NA	NA	NA	0.354873	5.46731e-14	0.448138	0.131069	NA	NA	0.274813	0.000148952	NA	NA	NA	NA	0.385178	1	NA	NA	NA	NA
ISG20L2	NA	NA	NA	NA	NA	NA	NA	NA	NA	NA	NA	NA	NA	NA	-0.287754	1	NA	NA	NA	NA	NA	NA	NA	NA	NA	NA	-1.1072	1	NA	NA
ITCH	NA	NA	NA	NA	0.290721	1	NA	NA	NA	NA	NA	NA	NA	NA	NA	NA	NA	NA	NA	NA	NA	NA	NA	NA	-0.342668	1	0.457965	1	NA	NA
ITFG1	NA	NA	NA	NA	0.25687	1	NA	NA	NA	NA	NA	NA	NA	NA	NA	NA	NA	NA	NA	NA	NA	NA	NA	NA	NA	NA	-0.881007	1	NA	NA
ITGA2B	NA	NA	NA	NA	NA	NA	NA	NA	NA	NA	NA	NA	NA	NA	NA	NA	NA	NA	NA	NA	NA	NA	NA	NA	NA	NA	-2.16898	1	NA	NA
ITGA4	NA	NA	0.423855	1	0.933723	3.98031e-05	0.389064	1	NA	NA	NA	NA	NA	NA	-0.721921	0.162089	NA	NA	NA	NA	NA	NA	NA	NA	-0.322015	1	0.950032	1	NA	NA
ITGA5	-0.309086	6.37542e-42	NA	NA	NA	NA	-0.291677	1	NA	NA	NA	NA	NA	NA	NA	NA	NA	NA	NA	NA	NA	NA	NA	NA	NA	NA	NA	NA	-0.352631	1
ITGA6	NA	NA	NA	NA	NA	NA	0.788527	1	NA	NA	NA	NA	NA	NA	NA	NA	NA	NA	NA	NA	NA	NA	NA	NA	0.336607	1	-1.65548	1	0.720061	1
ITGAV	-0.41514	5.13299e-27	NA	NA	NA	NA	NA	NA	NA	NA	NA	NA	NA	NA	NA	NA	NA	NA	NA	NA	NA	NA	NA	NA	NA	NA	NA	NA	NA	NA
ITGAX	-0.633131	1.3513e-50	NA	NA	-0.30764	1	NA	NA	NA	NA	NA	NA	NA	NA	NA	NA	NA	NA	NA	NA	NA	NA	NA	NA	NA	NA	NA	NA	NA	NA
ITGB1	NA	NA	NA	NA	NA	NA	NA	NA	NA	NA	NA	NA	NA	NA	NA	NA	NA	NA	NA	NA	-0.559121	1	NA	NA	NA	NA	-0.634157	1	0.322324	1
ITGB2-AS1	-0.28499	2.95393e-30	-0.521015	3.76458e-09	NA	NA	NA	NA	NA	NA	NA	NA	NA	NA	NA	NA	NA	NA	NA	NA	NA	NA	NA	NA	NA	NA	NA	NA	NA	NA
ITGB3	NA	NA	NA	NA	NA	NA	NA	NA	NA	NA	NA	NA	NA	NA	NA	NA	NA	NA	NA	NA	NA	NA	NA	NA	NA	NA	-2.09114	1	NA	NA
ITGB5	NA	NA	NA	NA	NA	NA	NA	NA	NA	NA	NA	NA	NA	NA	NA	NA	NA	NA	NA	NA	NA	NA	NA	NA	NA	NA	-1.07314	1	NA	NA
ITGB7	NA	NA	NA	NA	-0.443383	1	NA	NA	NA	NA	NA	NA	NA	NA	0.288892	1	0.268345	3.46495e-14	NA	NA	NA	NA	NA	NA	NA	NA	NA	NA	NA	NA
ITK	NA	NA	NA	NA	NA	NA	NA	NA	0.351354	1.98276e-130	0.322604	1.19813e-53	NA	NA	-0.292614	1	0.33079	6.02231e-16	NA	NA	NA	NA	0.41373	1	0.361694	1	NA	NA	1.04727	1.47953e-05
ITM2A	NA	NA	NA	NA	NA	NA	-0.461938	1	-0.379481	1.25669e-123	-0.313129	5.63267e-29	-0.326094	1.75728e-07	NA	NA	NA	NA	NA	NA	NA	NA	-0.277427	1	NA	NA	0.567971	1	-0.308999	0.185329
ITM2B	-0.662281	7.70704e-82	-0.495168	0.000474767	NA	NA	-0.262415	1	-0.25284	1.16438e-128	NA	NA	NA	NA	NA	NA	NA	NA	NA	NA	0.378229	1	-0.470765	0.000107178	NA	NA	-1.05311	1	-0.414973	0.046622
ITM2C	NA	NA	NA	NA	-0.619946	1	-0.624644	1	NA	NA	NA	NA	NA	NA	0.804268	0.0780999	NA	NA	NA	NA	NA	NA	NA	NA	-0.634473	8.09988e-05	0.622453	1	NA	NA
ITPKB	NA	NA	NA	NA	NA	NA	NA	NA	NA	NA	NA	NA	NA	NA	NA	NA	NA	NA	NA	NA	NA	NA	NA	NA	0.388686	1	0.43816	1	1.00586	0.000131062
ITPR1	NA	NA	NA	NA	NA	NA	NA	NA	NA	NA	NA	NA	NA	NA	NA	NA	NA	NA	NA	NA	NA	NA	NA	NA	-0.382059	0.398205	-0.854859	1	NA	NA
ITSN2	NA	NA	NA	NA	NA	NA	-0.291023	1	NA	NA	NA	NA	NA	NA	NA	NA	NA	NA	NA	NA	NA	NA	NA	NA	NA	NA	2.03174	1	0.56595	1
IVNS1ABP	NA	NA	NA	NA	0.664111	1	NA	NA	NA	NA	NA	NA	NA	NA	-0.426723	1	NA	NA	NA	NA	NA	NA	NA	NA	NA	NA	0.950032	1	NA	NA
JAK1	NA	NA	-0.262015	1	NA	NA	0.309933	1	NA	NA	NA	NA	NA	NA	-0.355497	1	NA	NA	NA	NA	NA	NA	NA	NA	0.416127	1	1.13461	1	0.3263	1
JAM3	NA	NA	NA	NA	NA	NA	NA	NA	NA	NA	NA	NA	NA	NA	NA	NA	NA	NA	NA	NA	NA	NA	NA	NA	NA	NA	-0.922349	1	NA	NA
JARID2	-0.690676	1.29298e-74	NA	NA	-0.445753	1	NA	NA	NA	NA	NA	NA	NA	NA	NA	NA	NA	NA	NA	NA	NA	NA	NA	NA	NA	NA	1.11199	1	NA	NA
JCHAIN	NA	NA	NA	NA	-0.323711	1	NA	NA	NA	NA	NA	NA	NA	NA	1.8163	0.000137428	NA	NA	-0.32143	0.660384	0.336946	1	NA	NA	NA	NA	NA	NA	NA	NA
JMJD1C	NA	NA	NA	NA	-0.485219	1	-0.268263	1	NA	NA	NA	NA	NA	NA	NA	NA	0.27161	8.16492e-09	NA	NA	NA	NA	NA	NA	NA	NA	2.00223	1	0.597327	0.0355281
JMJD6	NA	NA	NA	NA	-0.457589	0.187765	NA	NA	NA	NA	-0.347688	7.96113e-41	NA	NA	NA	NA	NA	NA	NA	NA	NA	NA	NA	NA	NA	NA	NA	NA	NA	NA
JMY	-0.260628	1.65132e-11	-0.595854	0.0247293	-0.432819	1	NA	NA	NA	NA	NA	NA	NA	NA	NA	NA	NA	NA	NA	NA	NA	NA	NA	NA	0.374318	1	0.728595	1	-0.2864	1
JOSD1	-0.377643	2.85926e-44	-0.476629	0.000112622	-0.379856	1	NA	NA	NA	NA	NA	NA	NA	NA	NA	NA	NA	NA	NA	NA	NA	NA	NA	NA	NA	NA	1.05588	1	0.558662	1
JPT1	NA	NA	-0.927226	2.4438e-06	NA	NA	0.370223	1	NA	NA	NA	NA	NA	NA	NA	NA	NA	NA	NA	NA	NA	NA	0.292741	1	NA	NA	NA	NA	NA	NA
JPX	NA	NA	NA	NA	NA	NA	-0.258272	1	NA	NA	NA	NA	NA	NA	0.394543	0.355204	NA	NA	NA	NA	NA	NA	NA	NA	-0.368374	0.029478	NA	NA	NA	NA
JTB	NA	NA	NA	NA	0.489839	0.719153	NA	NA	NA	NA	NA	NA	NA	NA	NA	NA	NA	NA	NA	NA	NA	NA	NA	NA	NA	NA	-0.616637	1	NA	NA
JUN	NA	NA	-0.583995	1	NA	NA	0.715788	1	0.646053	1.74816e-190	0.265478	2.59963e-21	NA	NA	0.386173	1	NA	NA	0.393845	0.0390245	NA	NA	0.328067	1	NA	NA	2.42686	1	0.335709	1
JUNB	-0.385598	1.0833e-20	-0.403709	1	-0.87048	1	NA	NA	-0.257636	1.92985e-43	NA	NA	-0.359365	2.60791e-11	-0.31274	1	-0.330474	3.77764e-11	0.382004	2.03599e-07	-0.327834	1	NA	NA	NA	NA	4.16917	1	0.378823	1
JUND	-0.539869	8.62673e-68	-0.762979	7.12241e-20	-0.943716	2.73325e-08	-0.340179	1	NA	NA	NA	NA	-0.274423	3.47085e-26	NA	NA	-0.310281	1.80046e-47	-0.265577	3.47859e-19	-0.635933	0.118418	-0.294539	1	-0.444022	0.0259086	-0.351095	1	NA	NA
JUP	NA	NA	NA	NA	NA	NA	NA	NA	NA	NA	NA	NA	NA	NA	NA	NA	NA	NA	NA	NA	NA	NA	NA	NA	-0.522404	0.00188609	NA	NA	NA	NA
KARS	-0.334999	5.60821e-37	-0.316829	1.27523e-06	-0.345958	0.295388	NA	NA	NA	NA	NA	NA	NA	NA	0.279772	0.0563741	NA	NA	NA	NA	NA	NA	NA	NA	NA	NA	NA	NA	NA	NA
KAT6A	NA	NA	NA	NA	NA	NA	0.375251	1	NA	NA	NA	NA	NA	NA	-0.48447	1	NA	NA	NA	NA	NA	NA	NA	NA	NA	NA	NA	NA	0.680593	0.0208937
KAT6B	0.27044	4.44935e-58	NA	NA	NA	NA	NA	NA	NA	NA	NA	NA	NA	NA	-0.348577	1	NA	NA	NA	NA	NA	NA	NA	NA	NA	NA	NA	NA	0.440842	1
KAT8	NA	NA	NA	NA	NA	NA	NA	NA	NA	NA	NA	NA	NA	NA	NA	NA	NA	NA	NA	NA	NA	NA	NA	NA	-0.318949	0.00664705	NA	NA	NA	NA
KBTBD2	-0.265319	2.0428e-43	NA	NA	NA	NA	NA	NA	NA	NA	NA	NA	NA	NA	NA	NA	NA	NA	NA	NA	NA	NA	NA	NA	NA	NA	1.37833	1	NA	NA
KBTBD8	NA	NA	NA	NA	-0.288574	1	NA	NA	NA	NA	NA	NA	NA	NA	NA	NA	NA	NA	NA	NA	NA	NA	NA	NA	NA	NA	NA	NA	NA	NA
KCNK6	NA	NA	0.265774	1	-0.395531	1	NA	NA	NA	NA	NA	NA	NA	NA	NA	NA	NA	NA	NA	NA	NA	NA	NA	NA	NA	NA	-0.903016	1	NA	NA
KCNMA1	NA	NA	-0.360682	2.9091e-06	NA	NA	NA	NA	NA	NA	NA	NA	NA	NA	NA	NA	NA	NA	NA	NA	NA	NA	NA	NA	NA	NA	NA	NA	NA	NA
KCNQ1OT1	NA	NA	NA	NA	-0.436449	1	NA	NA	NA	NA	NA	NA	NA	NA	NA	NA	NA	NA	NA	NA	NA	NA	NA	NA	-0.672979	1	NA	NA	NA	NA
KCTD20	NA	NA	NA	NA	NA	NA	NA	NA	NA	NA	NA	NA	NA	NA	NA	NA	NA	NA	NA	NA	NA	NA	NA	NA	NA	NA	-1.83688	1	NA	NA
KDELR1	NA	NA	NA	NA	0.253981	1	-0.254956	1	NA	NA	NA	NA	NA	NA	0.279424	1	NA	NA	NA	NA	NA	NA	NA	NA	-0.682337	6.10314e-06	NA	NA	NA	NA
KDM1A	NA	NA	NA	NA	0.273315	0.0808154	NA	NA	NA	NA	NA	NA	NA	NA	NA	NA	NA	NA	NA	NA	NA	NA	NA	NA	-0.290397	0.1721	NA	NA	NA	NA
KDM5A	NA	NA	NA	NA	NA	NA	-0.35075	1	NA	NA	NA	NA	NA	NA	NA	NA	NA	NA	NA	NA	NA	NA	NA	NA	NA	NA	NA	NA	0.45788	1
KDM5B	NA	NA	NA	NA	NA	NA	0.300879	1	NA	NA	NA	NA	NA	NA	-0.270242	1	NA	NA	NA	NA	NA	NA	NA	NA	NA	NA	NA	NA	0.270698	1
KDM6B	-1.39667	7.37339e-207	-1.18632	8.62249e-21	-1.10277	0.000696591	-0.679305	1	-0.291469	4.09564e-90	-0.308697	2.82737e-34	NA	NA	-0.400038	1	NA	NA	-0.252002	0.00360277	NA	NA	NA	NA	-0.33736	1	NA	NA	NA	NA
KHSRP	NA	NA	NA	NA	0.325115	1	0.263927	1	NA	NA	NA	NA	NA	NA	NA	NA	NA	NA	NA	NA	NA	NA	0.335958	1	-0.292423	1	1.11452	1	NA	NA
KIAA0232	0.314796	8.60624e-85	NA	NA	0.386886	0.120644	NA	NA	NA	NA	NA	NA	NA	NA	NA	NA	NA	NA	NA	NA	NA	NA	NA	NA	-0.295751	1	NA	NA	-0.28981	1
KIAA0513	NA	NA	NA	NA	NA	NA	NA	NA	NA	NA	NA	NA	NA	NA	NA	NA	NA	NA	NA	NA	NA	NA	NA	NA	NA	NA	-1.45872	1	NA	NA
KIAA1109	NA	NA	NA	NA	NA	NA	0.258895	1	NA	NA	NA	NA	NA	NA	NA	NA	NA	NA	NA	NA	NA	NA	NA	NA	NA	NA	1.38824	1	1.09487	0.000176138
KIAA1191	NA	NA	NA	NA	NA	NA	NA	NA	NA	NA	NA	NA	NA	NA	NA	NA	NA	NA	NA	NA	NA	NA	NA	NA	NA	NA	-0.474531	1	NA	NA
KIAA1551	-0.456031	1.39569e-47	-0.367668	2.64527e-05	-0.251398	1	-0.339707	0.242439	NA	NA	NA	NA	NA	NA	0.294275	0.0879648	NA	NA	NA	NA	NA	NA	NA	NA	NA	NA	NA	NA	NA	NA
KIF20B	NA	NA	NA	NA	NA	NA	-0.310278	1	NA	NA	NA	NA	NA	NA	NA	NA	NA	NA	NA	NA	NA	NA	NA	NA	NA	NA	NA	NA	NA	NA
KIF2A	NA	NA	NA	NA	NA	NA	NA	NA	NA	NA	NA	NA	NA	NA	NA	NA	NA	NA	NA	NA	NA	NA	NA	NA	NA	NA	-1.99667	1	0.285522	1
KIF5B	0.36	3.87731e-43	NA	NA	0.454385	1	NA	NA	NA	NA	NA	NA	NA	NA	NA	NA	NA	NA	NA	NA	NA	NA	NA	NA	NA	NA	-0.705823	1	0.262064	1
KIF9	NA	NA	NA	NA	NA	NA	NA	NA	NA	NA	NA	NA	NA	NA	NA	NA	NA	NA	NA	NA	NA	NA	NA	NA	-0.26883	1	NA	NA	NA	NA
KIFC3	NA	NA	0.347624	7.87373e-11	NA	NA	NA	NA	NA	NA	NA	NA	NA	NA	NA	NA	NA	NA	NA	NA	NA	NA	NA	NA	NA	NA	-1.80863	1	NA	NA
KIR2DL1	NA	NA	NA	NA	NA	NA	NA	NA	NA	NA	NA	NA	NA	NA	NA	NA	NA	NA	NA	NA	NA	NA	-0.290811	1	NA	NA	NA	NA	NA	NA
KIR3DL2	NA	NA	NA	NA	NA	NA	NA	NA	NA	NA	NA	NA	NA	NA	NA	NA	NA	NA	NA	NA	NA	NA	-0.268131	1	NA	NA	NA	NA	NA	NA
KIT	NA	NA	NA	NA	NA	NA	NA	NA	NA	NA	NA	NA	NA	NA	NA	NA	NA	NA	NA	NA	NA	NA	NA	NA	-0.379816	1	NA	NA	NA	NA
KLF10	-0.438164	1.14847e-24	NA	NA	NA	NA	-0.413112	1	NA	NA	NA	NA	NA	NA	NA	NA	NA	NA	NA	NA	NA	NA	NA	NA	-0.931099	1.76986e-09	NA	NA	-0.717974	1
KLF11	NA	NA	NA	NA	NA	NA	NA	NA	NA	NA	NA	NA	NA	NA	NA	NA	NA	NA	NA	NA	NA	NA	NA	NA	-0.318425	0.184148	NA	NA	NA	NA
KLF12	NA	NA	NA	NA	NA	NA	NA	NA	NA	NA	NA	NA	NA	NA	-0.337425	1	NA	NA	NA	NA	NA	NA	NA	NA	NA	NA	NA	NA	NA	NA
KLF16	NA	NA	NA	NA	NA	NA	-0.299487	1	NA	NA	NA	NA	NA	NA	NA	NA	NA	NA	NA	NA	NA	NA	NA	NA	NA	NA	1.11452	1	NA	NA
KLF2	0.32835	3.0569e-42	-0.256006	1	NA	NA	NA	NA	NA	NA	NA	NA	NA	NA	NA	NA	-0.273061	0.000220817	NA	NA	NA	NA	-0.679149	0.00338341	0.405565	1	3.70155	1	0.317902	1
KLF3	NA	NA	NA	NA	NA	NA	0.472591	1	NA	NA	NA	NA	NA	NA	NA	NA	NA	NA	-0.251936	0.0771938	NA	NA	NA	NA	NA	NA	1.77991	1	0.34763	0.935419
KLF4	-0.443077	1.21258e-17	-0.660445	1	-0.329574	1	NA	NA	NA	NA	NA	NA	NA	NA	0.416574	1	NA	NA	NA	NA	NA	NA	0.262613	1	-1.00785	2.82894e-07	NA	NA	NA	NA
KLF6	NA	NA	-0.256594	1	NA	NA	NA	NA	NA	NA	NA	NA	NA	NA	NA	NA	NA	NA	NA	NA	NA	NA	NA	NA	NA	NA	-1.3268	1	-0.654724	2.90143e-05
KLF7	0.403422	2.14608e-87	0.449169	0.12739	0.397819	1	NA	NA	NA	NA	NA	NA	NA	NA	NA	NA	NA	NA	NA	NA	NA	NA	NA	NA	-0.30371	0.329085	0.577172	1	NA	NA
KLHDC4	NA	NA	NA	NA	NA	NA	-0.274486	1	NA	NA	NA	NA	NA	NA	-0.261211	1	NA	NA	NA	NA	NA	NA	NA	NA	NA	NA	NA	NA	NA	NA
KLHL21	-0.477533	2.77344e-42	NA	NA	NA	NA	NA	NA	NA	NA	NA	NA	NA	NA	NA	NA	NA	NA	NA	NA	NA	NA	NA	NA	NA	NA	NA	NA	NA	NA
KLHL24	NA	NA	NA	NA	NA	NA	NA	NA	NA	NA	NA	NA	-0.275157	1.86735e-14	-0.275649	1	-0.291766	7.28619e-10	NA	NA	NA	NA	-0.318718	1	NA	NA	0.820984	1	NA	NA
KLHL28	NA	NA	NA	NA	NA	NA	NA	NA	NA	NA	NA	NA	NA	NA	-0.277257	1	NA	NA	NA	NA	NA	NA	NA	NA	NA	NA	NA	NA	NA	NA
KLRB1	NA	NA	NA	NA	NA	NA	NA	NA	NA	NA	-0.376566	9.15588e-07	NA	NA	-0.353558	1	NA	NA	NA	NA	NA	NA	0.332551	1	0.562743	1	NA	NA	-1.04144	1
KLRC1	NA	NA	NA	NA	NA	NA	NA	NA	NA	NA	NA	NA	-0.340048	9.78331e-06	NA	NA	NA	NA	NA	NA	NA	NA	NA	NA	NA	NA	NA	NA	NA	NA
KLRC2	NA	NA	NA	NA	NA	NA	NA	NA	NA	NA	NA	NA	NA	NA	NA	NA	-0.25328	0.0564493	NA	NA	NA	NA	NA	NA	NA	NA	NA	NA	NA	NA
KLRD1	NA	NA	NA	NA	NA	NA	NA	NA	NA	NA	NA	NA	NA	NA	-0.389631	1	NA	NA	NA	NA	NA	NA	NA	NA	NA	NA	NA	NA	-0.981671	0.0241833
KLRF1	NA	NA	NA	NA	NA	NA	NA	NA	NA	NA	NA	NA	NA	NA	-0.266832	1	-0.602396	1.15255e-39	NA	NA	NA	NA	-0.322749	1	NA	NA	NA	NA	NA	NA
KLRG1	NA	NA	NA	NA	NA	NA	NA	NA	NA	NA	NA	NA	NA	NA	NA	NA	NA	NA	NA	NA	NA	NA	NA	NA	-0.257605	1	1.69787	1	NA	NA
KMO	NA	NA	-0.289287	1	NA	NA	NA	NA	NA	NA	NA	NA	NA	NA	NA	NA	NA	NA	NA	NA	NA	NA	NA	NA	NA	NA	NA	NA	NA	NA
KMT2A	NA	NA	-0.324156	1	NA	NA	NA	NA	NA	NA	NA	NA	NA	NA	NA	NA	NA	NA	NA	NA	NA	NA	NA	NA	NA	NA	-1.21705	1	NA	NA
KMT2B	NA	NA	NA	NA	NA	NA	-0.34014	1	NA	NA	NA	NA	NA	NA	NA	NA	NA	NA	NA	NA	NA	NA	NA	NA	NA	NA	NA	NA	0.466299	1
KMT2C	NA	NA	-0.260343	1	0.397558	1	NA	NA	NA	NA	NA	NA	NA	NA	NA	NA	0.274131	9.74314e-09	NA	NA	NA	NA	NA	NA	-0.331209	0.120442	0.639008	1	0.929138	0.000470332
KMT2E	NA	NA	NA	NA	NA	NA	NA	NA	NA	NA	NA	NA	NA	NA	-0.250178	1	NA	NA	NA	NA	NA	NA	NA	NA	0.348779	1	1.82805	1	0.364127	0.674605
KMT2E-AS1	-0.466796	1.00523e-51	-0.290571	0.000195722	NA	NA	NA	NA	NA	NA	NA	NA	NA	NA	NA	NA	NA	NA	NA	NA	NA	NA	NA	NA	NA	NA	NA	NA	NA	NA
KMT5B	NA	NA	NA	NA	NA	NA	-0.331648	1	NA	NA	NA	NA	NA	NA	NA	NA	NA	NA	NA	NA	NA	NA	NA	NA	NA	NA	NA	NA	NA	NA
KPNA2	NA	NA	NA	NA	NA	NA	-0.397838	1	NA	NA	-0.256993	4.38328e-28	NA	NA	NA	NA	NA	NA	-0.250036	0.00311304	NA	NA	NA	NA	0.629451	0.392785	NA	NA	NA	NA
KPNA4	NA	NA	NA	NA	-0.27827	1	NA	NA	NA	NA	NA	NA	NA	NA	NA	NA	NA	NA	NA	NA	NA	NA	NA	NA	NA	NA	NA	NA	NA	NA
KPNB1	0.296605	4.16999e-52	NA	NA	0.608257	1	NA	NA	NA	NA	NA	NA	NA	NA	NA	NA	NA	NA	NA	NA	NA	NA	0.28988	1	-0.450801	0.0306279	1.99634	1	NA	NA
KRAS	NA	NA	NA	NA	NA	NA	-0.288914	1	NA	NA	NA	NA	NA	NA	NA	NA	NA	NA	NA	NA	NA	NA	NA	NA	NA	NA	NA	NA	NA	NA
KRT18	NA	NA	NA	NA	NA	NA	NA	NA	NA	NA	NA	NA	NA	NA	NA	NA	NA	NA	NA	NA	NA	NA	NA	NA	-0.306111	1	NA	NA	NA	NA
KRTCAP2	NA	NA	NA	NA	NA	NA	NA	NA	NA	NA	NA	NA	NA	NA	NA	NA	NA	NA	NA	NA	NA	NA	NA	NA	-0.268198	0.146358	NA	NA	NA	NA
KTI12	NA	NA	NA	NA	NA	NA	NA	NA	NA	NA	NA	NA	NA	NA	NA	NA	NA	NA	NA	NA	NA	NA	NA	NA	NA	NA	-0.96415	1	NA	NA
KTN1	0.337708	9.61174e-39	NA	NA	0.565034	1	NA	NA	NA	NA	NA	NA	NA	NA	-0.336099	1	NA	NA	NA	NA	NA	NA	NA	NA	-0.615218	0.000104401	1.572	1	0.836537	0.0120572
LACTB	NA	NA	NA	NA	0.364541	1	NA	NA	NA	NA	NA	NA	NA	NA	NA	NA	NA	NA	NA	NA	-0.299107	1	NA	NA	NA	NA	NA	NA	NA	NA
LAGE3	NA	NA	NA	NA	NA	NA	NA	NA	NA	NA	NA	NA	NA	NA	NA	NA	NA	NA	NA	NA	NA	NA	NA	NA	-0.406739	0.0251668	1.572	1	NA	NA
LAMP1	NA	NA	0.461288	0.0721561	0.507484	1	NA	NA	NA	NA	NA	NA	NA	NA	NA	NA	NA	NA	NA	NA	NA	NA	NA	NA	NA	NA	-0.354775	1	NA	NA
LAMP2	0.321475	1.86709e-46	0.485054	0.0232522	0.560744	1	NA	NA	NA	NA	NA	NA	NA	NA	NA	NA	NA	NA	NA	NA	NA	NA	NA	NA	-0.509816	0.00629941	NA	NA	NA	NA
LAMP5	NA	NA	NA	NA	NA	NA	-0.260275	1	NA	NA	NA	NA	NA	NA	NA	NA	NA	NA	NA	NA	NA	NA	NA	NA	NA	NA	NA	NA	NA	NA
LAMTOR1	0.276466	2.63506e-28	0.307621	1	0.284328	1	NA	NA	NA	NA	NA	NA	NA	NA	NA	NA	NA	NA	NA	NA	NA	NA	NA	NA	-0.542337	0.0468921	-2.89959	1	NA	NA
LAMTOR3	NA	NA	NA	NA	NA	NA	-0.298761	1	NA	NA	NA	NA	NA	NA	NA	NA	NA	NA	NA	NA	NA	NA	NA	NA	NA	NA	1.11452	1	NA	NA
LAMTOR4	NA	NA	NA	NA	0.342132	1	NA	NA	NA	NA	NA	NA	NA	NA	NA	NA	NA	NA	NA	NA	NA	NA	NA	NA	-0.367323	0.843414	-1.62999	1	-0.487309	0.0254264
LAP3	NA	NA	0.325224	1	1.00748	7.40798e-06	-0.570334	1	NA	NA	NA	NA	NA	NA	NA	NA	NA	NA	NA	NA	NA	NA	NA	NA	NA	NA	0.938401	1	NA	NA
LAPTM4A	0.298808	4.82891e-40	0.360028	1	NA	NA	NA	NA	NA	NA	NA	NA	NA	NA	NA	NA	-0.293888	1.94499e-20	NA	NA	NA	NA	NA	NA	-0.674675	2.51294e-06	NA	NA	-0.358313	1
LAPTM4B	NA	NA	NA	NA	NA	NA	NA	NA	NA	NA	NA	NA	NA	NA	NA	NA	NA	NA	NA	NA	NA	NA	NA	NA	-1.05531	1.68163e-11	-0.893801	1	NA	NA
LAPTM5	-0.464719	8.76763e-42	-0.317242	0.318137	NA	NA	NA	NA	NA	NA	NA	NA	NA	NA	NA	NA	0.375499	4.16699e-18	NA	NA	-0.521226	1	0.443445	1	NA	NA	-0.837574	1	NA	NA
LARS	NA	NA	NA	NA	-0.255272	1	NA	NA	NA	NA	NA	NA	NA	NA	NA	NA	NA	NA	NA	NA	NA	NA	NA	NA	-0.361183	1	NA	NA	NA	NA
LAT	NA	NA	NA	NA	NA	NA	NA	NA	NA	NA	NA	NA	NA	NA	NA	NA	NA	NA	NA	NA	NA	NA	-0.324096	1	0.723045	0.0850617	NA	NA	NA	NA
LAT2	NA	NA	NA	NA	0.276718	1	NA	NA	NA	NA	NA	NA	NA	NA	NA	NA	NA	NA	NA	NA	NA	NA	NA	NA	-0.458416	0.0647053	NA	NA	NA	NA
LATS2	NA	NA	NA	NA	NA	NA	NA	NA	NA	NA	NA	NA	NA	NA	NA	NA	NA	NA	NA	NA	NA	NA	NA	NA	-0.26271	1	NA	NA	NA	NA
LBR	0.553898	6.06089e-100	0.555201	1.44852e-06	0.564709	0.408512	NA	NA	NA	NA	NA	NA	NA	NA	-0.367352	1	NA	NA	NA	NA	NA	NA	NA	NA	NA	NA	1.27801	1	0.347494	1
LCK	NA	NA	NA	NA	NA	NA	NA	NA	NA	NA	NA	NA	NA	NA	NA	NA	-0.365826	3.15568e-21	NA	NA	NA	NA	-0.361862	1	0.442566	1	0.698489	1	NA	NA
LCMT1	NA	NA	NA	NA	NA	NA	NA	NA	NA	NA	NA	NA	NA	NA	NA	NA	NA	NA	NA	NA	NA	NA	NA	NA	-0.364887	0.245998	NA	NA	NA	NA
LCOR	NA	NA	NA	NA	NA	NA	NA	NA	NA	NA	NA	NA	NA	NA	NA	NA	NA	NA	NA	NA	NA	NA	NA	NA	-0.357568	0.198469	-1.28814	1	NA	NA
LCP1	0.662688	1.28523e-59	1.31276	4.8964e-31	1.20205	1.4902e-10	NA	NA	NA	NA	NA	NA	NA	NA	-0.272831	1	NA	NA	NA	NA	NA	NA	NA	NA	NA	NA	-0.5078	1	-0.304083	1
LCP2	-0.961737	3.94501e-120	-0.596304	0.00206131	NA	NA	NA	NA	NA	NA	NA	NA	NA	NA	NA	NA	NA	NA	NA	NA	NA	NA	NA	NA	NA	NA	NA	NA	NA	NA
LDHB	-0.791911	4.47796e-92	-0.449517	4.29044e-07	-1.07323	4.21972e-05	-1.34411	3.23215e-06	NA	NA	NA	NA	NA	NA	1.6009	1.87262e-15	NA	NA	NA	NA	0.313254	1	-0.69349	1	-1.57394	4.90476e-06	NA	NA	NA	NA
LDLRAD4	NA	NA	NA	NA	-0.466309	1	NA	NA	NA	NA	NA	NA	NA	NA	NA	NA	NA	NA	NA	NA	NA	NA	NA	NA	NA	NA	NA	NA	0.251588	1
LDLRAP1	NA	NA	NA	NA	NA	NA	NA	NA	NA	NA	NA	NA	NA	NA	NA	NA	NA	NA	NA	NA	NA	NA	NA	NA	NA	NA	-1.77056	1	NA	NA
LEF1	NA	NA	NA	NA	NA	NA	1.02525	1	NA	NA	NA	NA	NA	NA	-0.271479	1	NA	NA	NA	NA	NA	NA	NA	NA	0.871502	0.00514418	1.11452	1	1.09276	3.35579e-05
LEFTY1	NA	NA	NA	NA	NA	NA	NA	NA	NA	NA	NA	NA	NA	NA	NA	NA	NA	NA	NA	NA	NA	NA	NA	NA	NA	NA	-0.941226	1	NA	NA
LEMD3	NA	NA	NA	NA	NA	NA	-0.300817	1	NA	NA	NA	NA	NA	NA	NA	NA	NA	NA	NA	NA	NA	NA	NA	NA	NA	NA	NA	NA	0.266162	1
LENG8	NA	NA	NA	NA	NA	NA	NA	NA	NA	NA	NA	NA	NA	NA	-0.30264	1	NA	NA	NA	NA	NA	NA	NA	NA	NA	NA	NA	NA	0.468895	1
LEPROT	NA	NA	NA	NA	0.399951	1	NA	NA	NA	NA	NA	NA	NA	NA	NA	NA	NA	NA	NA	NA	NA	NA	NA	NA	-0.858552	5.55122e-08	-2.73032	1	NA	NA
LEPROTL1	NA	NA	NA	NA	-0.281452	1	0.69864	1	NA	NA	NA	NA	NA	NA	NA	NA	NA	NA	NA	NA	NA	NA	-0.379992	1	0.91459	3.57887e-06	1.50744	1	NA	NA
LETM1	NA	NA	NA	NA	NA	NA	-0.541733	1	NA	NA	NA	NA	NA	NA	NA	NA	NA	NA	NA	NA	NA	NA	NA	NA	NA	NA	NA	NA	NA	NA
LETMD1	NA	NA	-0.323558	0.986225	NA	NA	NA	NA	NA	NA	NA	NA	NA	NA	0.274747	1	NA	NA	NA	NA	NA	NA	NA	NA	NA	NA	NA	NA	NA	NA
LFNG	NA	NA	NA	NA	NA	NA	-0.26756	1	NA	NA	NA	NA	NA	NA	-0.301649	1	NA	NA	NA	NA	NA	NA	0.280424	0.904066	NA	NA	NA	NA	NA	NA
LGALS1	1.16095	1.1522e-159	0.904086	1.32735e-15	0.984276	0.000790078	-0.360542	1	NA	NA	-0.38267	1.44919e-17	NA	NA	NA	NA	0.738939	1.53606e-12	NA	NA	NA	NA	NA	NA	-0.559636	0.00622285	NA	NA	-0.701212	1
LGALS12	NA	NA	NA	NA	NA	NA	NA	NA	NA	NA	NA	NA	NA	NA	NA	NA	NA	NA	NA	NA	NA	NA	NA	NA	NA	NA	-1.24387	1	NA	NA
LGALS2	-1.39535	1.4026e-104	-0.339828	1	-1.33703	0.000525879	NA	NA	NA	NA	NA	NA	NA	NA	NA	NA	NA	NA	NA	NA	NA	NA	NA	NA	NA	NA	NA	NA	NA	NA
LGALS3	-0.86927	1.44408e-85	0.385595	1	NA	NA	NA	NA	NA	NA	NA	NA	NA	NA	NA	NA	NA	NA	NA	NA	NA	NA	0.69909	0.0521099	NA	NA	NA	NA	NA	NA
LGALS9	NA	NA	NA	NA	NA	NA	NA	NA	NA	NA	NA	NA	NA	NA	NA	NA	NA	NA	NA	NA	NA	NA	NA	NA	-0.502449	0.0107508	NA	NA	NA	NA
LGALSL	NA	NA	NA	NA	NA	NA	NA	NA	NA	NA	NA	NA	NA	NA	NA	NA	NA	NA	NA	NA	NA	NA	NA	NA	NA	NA	-0.663879	1	NA	NA
LGMN	NA	NA	NA	NA	-1.08983	0.00075621	-0.519793	1	NA	NA	NA	NA	NA	NA	NA	NA	NA	NA	NA	NA	-0.30302	1	NA	NA	NA	NA	NA	NA	NA	NA
LILRA4	NA	NA	NA	NA	NA	NA	-0.335533	1	NA	NA	NA	NA	NA	NA	NA	NA	NA	NA	NA	NA	NA	NA	NA	NA	NA	NA	NA	NA	NA	NA
LIMD2	NA	NA	-0.338237	1	-0.34175	1	0.284574	1	NA	NA	NA	NA	NA	NA	0.352801	1	NA	NA	NA	NA	-0.308222	1	NA	NA	0.292045	1	0.366336	1	0.45246	0.762269
LIMS1	-0.518686	2.55154e-56	-0.731123	0.00929884	NA	NA	NA	NA	NA	NA	NA	NA	NA	NA	NA	NA	NA	NA	NA	NA	NA	NA	NA	NA	-0.987726	1.23133e-08	-0.737112	1	NA	NA
LINC00513	NA	NA	NA	NA	NA	NA	-0.274239	1	NA	NA	NA	NA	NA	NA	NA	NA	NA	NA	NA	NA	NA	NA	NA	NA	NA	NA	NA	NA	NA	NA
LINC00877	-0.660393	1.63662e-69	-0.551132	9.0202e-15	NA	NA	NA	NA	NA	NA	NA	NA	NA	NA	NA	NA	NA	NA	NA	NA	NA	NA	NA	NA	NA	NA	NA	NA	NA	NA
LINC00884	-0.264273	1.85458e-29	NA	NA	NA	NA	NA	NA	NA	NA	NA	NA	NA	NA	NA	NA	NA	NA	NA	NA	NA	NA	NA	NA	NA	NA	NA	NA	NA	NA
LINC00909	NA	NA	NA	NA	NA	NA	-0.392701	0.0345622	NA	NA	NA	NA	NA	NA	NA	NA	NA	NA	NA	NA	NA	NA	NA	NA	NA	NA	NA	NA	NA	NA
LINC00937	-0.522242	2.74772e-59	NA	NA	NA	NA	NA	NA	NA	NA	NA	NA	NA	NA	NA	NA	NA	NA	NA	NA	NA	NA	NA	NA	NA	NA	NA	NA	NA	NA
LINC00996	NA	NA	NA	NA	NA	NA	-0.55757	1	NA	NA	NA	NA	NA	NA	NA	NA	NA	NA	NA	NA	NA	NA	NA	NA	NA	NA	NA	NA	NA	NA
LINC01003	-0.308219	4.42271e-28	NA	NA	NA	NA	NA	NA	NA	NA	NA	NA	NA	NA	NA	NA	NA	NA	NA	NA	NA	NA	NA	NA	-0.306945	0.419318	-1.37599	1	NA	NA
LINC01011	NA	NA	NA	NA	NA	NA	NA	NA	NA	NA	NA	NA	NA	NA	NA	NA	NA	NA	NA	NA	NA	NA	NA	NA	NA	NA	-0.637866	1	NA	NA
LINC01089	NA	NA	NA	NA	NA	NA	NA	NA	NA	NA	NA	NA	NA	NA	NA	NA	NA	NA	NA	NA	NA	NA	NA	NA	NA	NA	-0.917008	1	NA	NA
LINC01215	NA	NA	NA	NA	NA	NA	-0.313789	1	NA	NA	NA	NA	NA	NA	NA	NA	NA	NA	NA	NA	NA	NA	NA	NA	NA	NA	NA	NA	NA	NA
LINC01503	NA	NA	-0.259109	0.00139635	NA	NA	NA	NA	NA	NA	NA	NA	NA	NA	NA	NA	NA	NA	NA	NA	NA	NA	NA	NA	NA	NA	NA	NA	NA	NA
LINC01588	-0.551399	1.19483e-52	-0.363749	0.000290765	-0.292191	1	NA	NA	NA	NA	NA	NA	NA	NA	NA	NA	NA	NA	NA	NA	NA	NA	NA	NA	NA	NA	NA	NA	NA	NA
LINC02384	NA	NA	NA	NA	NA	NA	NA	NA	NA	NA	NA	NA	NA	NA	NA	NA	NA	NA	NA	NA	NA	NA	NA	NA	NA	NA	-1.28795	1	NA	NA
LINC02432	NA	NA	-0.386248	1.50337e-06	NA	NA	NA	NA	NA	NA	NA	NA	NA	NA	NA	NA	NA	NA	NA	NA	NA	NA	NA	NA	NA	NA	NA	NA	NA	NA
LIPA	NA	NA	0.368704	1	NA	NA	NA	NA	NA	NA	NA	NA	NA	NA	NA	NA	NA	NA	NA	NA	NA	NA	NA	NA	NA	NA	-1.47075	1	NA	NA
LITAF	-0.677303	6.67529e-77	NA	NA	-0.42369	1	-0.340413	1	NA	NA	NA	NA	NA	NA	NA	NA	NA	NA	-0.407997	3.78585e-08	NA	NA	NA	NA	0.621183	0.167777	0.76657	1	-0.507435	0.0697276
LLGL2	NA	NA	NA	NA	NA	NA	-0.32244	1	NA	NA	NA	NA	NA	NA	NA	NA	NA	NA	NA	NA	NA	NA	NA	NA	NA	NA	NA	NA	NA	NA
LMAN1	NA	NA	NA	NA	0.417701	1	NA	NA	NA	NA	NA	NA	NA	NA	NA	NA	NA	NA	NA	NA	0.366154	1	NA	NA	-0.261782	1	NA	NA	0.385632	1
LMAN2	NA	NA	NA	NA	0.55685	0.743745	NA	NA	NA	NA	NA	NA	NA	NA	NA	NA	NA	NA	NA	NA	NA	NA	NA	NA	NA	NA	-0.697791	1	NA	NA
LMBR1L	NA	NA	NA	NA	-0.281877	1	NA	NA	NA	NA	NA	NA	NA	NA	NA	NA	NA	NA	NA	NA	NA	NA	NA	NA	0.261334	1	NA	NA	NA	NA
LMNA	-0.32032	6.77388e-11	NA	NA	-0.570666	1	-0.799727	1	-0.518131	8.14525e-69	-0.34777	9.34905e-24	-0.373379	2.49475e-07	-0.502537	1	NA	NA	-0.597443	4.03137e-16	-0.742432	1	-0.417093	0.650059	-0.778855	1.1981e-07	-3.41269	1	-0.497381	1
LMO2	NA	NA	NA	NA	NA	NA	NA	NA	NA	NA	NA	NA	NA	NA	NA	NA	NA	NA	NA	NA	NA	NA	NA	NA	-1.18346	4.35661e-10	-1.23977	1	NA	NA
LNPEP	NA	NA	NA	NA	0.339694	1	NA	NA	NA	NA	NA	NA	NA	NA	-0.326773	1	NA	NA	NA	NA	NA	NA	NA	NA	NA	NA	-1.09672	1	NA	NA
LONP2	NA	NA	NA	NA	NA	NA	0.251948	1	NA	NA	NA	NA	NA	NA	NA	NA	NA	NA	NA	NA	NA	NA	NA	NA	-0.292365	1	NA	NA	NA	NA
LPCAT1	-0.756094	6.61677e-63	-0.499051	0.0366425	NA	NA	NA	NA	NA	NA	NA	NA	NA	NA	NA	NA	NA	NA	NA	NA	NA	NA	NA	NA	NA	NA	NA	NA	-0.441196	1
LPCAT2	0.316373	8.81954e-78	0.559723	7.05929e-06	0.317277	1	NA	NA	NA	NA	NA	NA	NA	NA	NA	NA	NA	NA	NA	NA	NA	NA	NA	NA	-0.328433	0.659346	NA	NA	NA	NA
LPIN1	NA	NA	NA	NA	NA	NA	-0.322855	1	NA	NA	NA	NA	NA	NA	NA	NA	NA	NA	NA	NA	NA	NA	NA	NA	NA	NA	1.99634	1	0.499098	1
LPIN2	NA	NA	NA	NA	NA	NA	NA	NA	NA	NA	NA	NA	NA	NA	NA	NA	NA	NA	NA	NA	NA	NA	NA	NA	-0.362021	1	NA	NA	NA	NA
LPXN	NA	NA	NA	NA	-0.324581	1	NA	NA	NA	NA	NA	NA	NA	NA	-0.312793	1	NA	NA	NA	NA	NA	NA	NA	NA	NA	NA	NA	NA	NA	NA
LRBA	NA	NA	NA	NA	NA	NA	NA	NA	NA	NA	NA	NA	NA	NA	NA	NA	NA	NA	NA	NA	NA	NA	NA	NA	-0.555146	0.00834305	NA	NA	0.342525	1
LRMDA	NA	NA	NA	NA	-0.268404	1	NA	NA	NA	NA	NA	NA	NA	NA	NA	NA	NA	NA	NA	NA	NA	NA	NA	NA	NA	NA	NA	NA	NA	NA
LRP10	NA	NA	NA	NA	NA	NA	-0.42829	1	NA	NA	NA	NA	NA	NA	NA	NA	NA	NA	NA	NA	NA	NA	NA	NA	NA	NA	NA	NA	NA	NA
LRP12	NA	NA	NA	NA	NA	NA	NA	NA	NA	NA	NA	NA	NA	NA	NA	NA	NA	NA	NA	NA	NA	NA	NA	NA	NA	NA	-0.625119	1	NA	NA
LRPAP1	NA	NA	NA	NA	0.293693	1	NA	NA	NA	NA	NA	NA	NA	NA	NA	NA	NA	NA	NA	NA	NA	NA	NA	NA	NA	NA	-1.0392	1	0.533639	1
LRR1	NA	NA	NA	NA	NA	NA	-0.339728	1	NA	NA	NA	NA	NA	NA	NA	NA	NA	NA	NA	NA	NA	NA	NA	NA	NA	NA	NA	NA	NA	NA
LRRC41	NA	NA	NA	NA	NA	NA	NA	NA	NA	NA	NA	NA	NA	NA	NA	NA	NA	NA	NA	NA	NA	NA	NA	NA	-0.255979	1	1.11452	1	NA	NA
LRRC58	NA	NA	NA	NA	0.264812	1	NA	NA	NA	NA	NA	NA	NA	NA	-0.252893	1	NA	NA	NA	NA	NA	NA	NA	NA	NA	NA	0.757132	1	0.318016	1
LRRC75A	NA	NA	NA	NA	-0.691679	1	NA	NA	NA	NA	NA	NA	NA	NA	NA	NA	NA	NA	NA	NA	NA	NA	NA	NA	-0.522975	1	1.66756	1	-0.463752	1
LRRC8D	NA	NA	NA	NA	NA	NA	NA	NA	NA	NA	NA	NA	NA	NA	NA	NA	NA	NA	NA	NA	NA	NA	NA	NA	NA	NA	-1.26223	1	NA	NA
LRRFIP1	0.465395	2.64344e-34	NA	NA	-0.424688	1	NA	NA	-0.3073	2.38383e-100	NA	NA	NA	NA	NA	NA	NA	NA	-0.407036	1.79686e-12	NA	NA	NA	NA	-0.456791	1	0.52164	1	NA	NA
LRRFIP2	0.34482	5.40626e-64	NA	NA	NA	NA	NA	NA	NA	NA	NA	NA	NA	NA	NA	NA	NA	NA	NA	NA	NA	NA	NA	NA	-0.327757	0.460738	-0.978054	1	NA	NA
LSM1	NA	NA	NA	NA	NA	NA	NA	NA	NA	NA	NA	NA	NA	NA	NA	NA	NA	NA	NA	NA	NA	NA	NA	NA	NA	NA	-1.44357	1	NA	NA
LSM2	NA	NA	NA	NA	NA	NA	NA	NA	NA	NA	NA	NA	NA	NA	NA	NA	NA	NA	NA	NA	NA	NA	NA	NA	-0.607581	9.08845e-07	NA	NA	NA	NA
LSM4	NA	NA	NA	NA	NA	NA	NA	NA	NA	NA	NA	NA	NA	NA	NA	NA	NA	NA	NA	NA	NA	NA	NA	NA	NA	NA	-1.12364	1	NA	NA
LSP1	NA	NA	-0.265908	1	NA	NA	0.336102	0.225024	NA	NA	NA	NA	NA	NA	NA	NA	NA	NA	NA	NA	NA	NA	NA	NA	NA	NA	NA	NA	NA	NA
LST1	-0.415351	4.97317e-14	-0.446562	0.000268189	NA	NA	-0.289388	1	NA	NA	NA	NA	NA	NA	NA	NA	NA	NA	NA	NA	NA	NA	0.352075	1	-0.574695	0.0250832	NA	NA	NA	NA
LTA4H	0.797245	1.30928e-74	0.920366	5.27937e-09	1.2311	7.35782e-06	NA	NA	NA	NA	NA	NA	NA	NA	NA	NA	NA	NA	NA	NA	NA	NA	NA	NA	-0.293245	1	NA	NA	NA	NA
LTB	0.344269	0.00156423	0.304723	1	-0.275995	1	-0.342552	1	NA	NA	NA	NA	0.793238	2.26821e-27	-0.676596	0.308424	0.322362	1	NA	NA	NA	NA	0.268332	1	1.5784	2.96849e-10	3.53793	1	NA	NA
LUC7L	NA	NA	NA	NA	NA	NA	NA	NA	NA	NA	NA	NA	NA	NA	-0.302014	1	NA	NA	NA	NA	NA	NA	NA	NA	NA	NA	1.66756	1	0.425992	1
LUC7L2	NA	NA	NA	NA	NA	NA	NA	NA	NA	NA	NA	NA	NA	NA	NA	NA	NA	NA	NA	NA	NA	NA	NA	NA	NA	NA	-0.862813	1	NA	NA
LUC7L3	0.262989	7.28016e-63	NA	NA	NA	NA	NA	NA	NA	NA	-0.271418	2.27878e-30	-0.257066	2.99668e-09	-0.559293	1	-0.328012	6.35357e-18	NA	NA	NA	NA	-0.286666	1	-0.624019	0.0205637	2.72626	1	0.812743	0.0935007
LUCAT1	-0.983768	4.00162e-98	NA	NA	NA	NA	NA	NA	NA	NA	NA	NA	NA	NA	NA	NA	NA	NA	NA	NA	NA	NA	NA	NA	NA	NA	NA	NA	NA	NA
LUZP1	NA	NA	NA	NA	NA	NA	NA	NA	NA	NA	NA	NA	0.372046	2.59642e-19	-0.273774	1	NA	NA	NA	NA	NA	NA	0.427638	1	NA	NA	NA	NA	NA	NA
LY6E	-1.47607	7.26576e-147	-0.959196	1.98179e-10	-1.02301	1	-0.520965	1	NA	NA	NA	NA	NA	NA	NA	NA	NA	NA	NA	NA	-0.260261	1	NA	NA	-0.284148	0.156183	NA	NA	-0.336964	0.0456579
LY6G5C	NA	NA	NA	NA	NA	NA	NA	NA	NA	NA	NA	NA	NA	NA	NA	NA	NA	NA	NA	NA	NA	NA	NA	NA	NA	NA	-1.0731	1	NA	NA
LY6G6F	NA	NA	NA	NA	NA	NA	NA	NA	NA	NA	NA	NA	NA	NA	NA	NA	NA	NA	NA	NA	NA	NA	NA	NA	NA	NA	-1.97474	1	NA	NA
LY86	-0.347603	1.73014e-64	NA	NA	NA	NA	NA	NA	NA	NA	NA	NA	NA	NA	NA	NA	NA	NA	NA	NA	NA	NA	NA	NA	NA	NA	NA	NA	NA	NA
LYAR	NA	NA	NA	NA	NA	NA	NA	NA	NA	NA	-0.287157	2.92936e-23	NA	NA	NA	NA	NA	NA	NA	NA	NA	NA	NA	NA	NA	NA	NA	NA	NA	NA
LYL1	NA	NA	-0.276495	1	NA	NA	0.275577	1	NA	NA	NA	NA	NA	NA	NA	NA	NA	NA	NA	NA	NA	NA	NA	NA	-0.898097	2.39119e-09	-0.762623	1	NA	NA
LYN	NA	NA	NA	NA	0.579744	1	-0.28917	1	NA	NA	NA	NA	NA	NA	NA	NA	NA	NA	NA	NA	NA	NA	NA	NA	-0.807642	1.0082e-06	-1.47445	1	NA	NA
LYPLA1	NA	NA	NA	NA	NA	NA	NA	NA	NA	NA	NA	NA	NA	NA	-0.283481	1	NA	NA	NA	NA	NA	NA	NA	NA	-0.282745	1	-1.41702	1	NA	NA
LYPLAL1	NA	NA	NA	NA	NA	NA	NA	NA	NA	NA	NA	NA	NA	NA	NA	NA	NA	NA	NA	NA	NA	NA	NA	NA	NA	NA	-1.0997	1	NA	NA
LYRM1	NA	NA	NA	NA	NA	NA	NA	NA	NA	NA	NA	NA	NA	NA	NA	NA	NA	NA	NA	NA	NA	NA	NA	NA	-0.279544	1	NA	NA	NA	NA
LYST	0.352373	3.25558e-63	NA	NA	0.603694	1	NA	NA	NA	NA	NA	NA	NA	NA	-0.29724	1	NA	NA	NA	NA	NA	NA	NA	NA	0.28334	1	0.665452	1	NA	NA
LYZ	0.346681	2.7673e-20	1.43651	4.06281e-10	1.53805	2.72721e-05	-1.618	1	NA	NA	NA	NA	NA	NA	-0.819396	1	NA	NA	NA	NA	NA	NA	3.59259	1	-0.588417	0.000370638	0.826246	1	NA	NA
M6PR	NA	NA	NA	NA	NA	NA	NA	NA	NA	NA	NA	NA	NA	NA	-0.254436	1	NA	NA	NA	NA	NA	NA	NA	NA	-0.264615	0.149739	-1.45861	1	NA	NA
MACF1	0.362039	6.24163e-68	0.331877	1	0.35793	1	NA	NA	NA	NA	NA	NA	NA	NA	NA	NA	NA	NA	NA	NA	NA	NA	NA	NA	-0.695427	1.79737e-05	NA	NA	NA	NA
MACO1	NA	NA	NA	NA	-0.256835	1	NA	NA	NA	NA	NA	NA	NA	NA	NA	NA	NA	NA	NA	NA	NA	NA	-0.352124	1	NA	NA	-0.792778	1	0.442058	1
MACROH2A1	1.57734	1.69763e-285	1.28593	3.624e-27	1.18323	0.000145113	0.540135	1	NA	NA	NA	NA	NA	NA	-0.506527	0.0231299	NA	NA	NA	NA	NA	NA	0.270151	1	NA	NA	1.02979	1	0.266552	1
MAD1L1	NA	NA	-0.404332	1.81915e-07	-0.289292	1	NA	NA	NA	NA	NA	NA	NA	NA	0.437489	7.02794e-05	NA	NA	NA	NA	NA	NA	NA	NA	NA	NA	NA	NA	NA	NA
MAD2L1BP	NA	NA	NA	NA	NA	NA	NA	NA	NA	NA	NA	NA	NA	NA	NA	NA	NA	NA	NA	NA	NA	NA	NA	NA	NA	NA	-1.13568	1	NA	NA
MAFF	-0.555987	2.67693e-62	NA	NA	-0.970474	1	NA	NA	NA	NA	NA	NA	NA	NA	0.267486	1	NA	NA	NA	NA	NA	NA	NA	NA	-1.11028	8.71897e-06	NA	NA	-0.851341	0.335339
MAFG	NA	NA	0.35623	0.00425164	NA	NA	NA	NA	NA	NA	NA	NA	NA	NA	NA	NA	NA	NA	NA	NA	NA	NA	NA	NA	-0.418978	0.559289	NA	NA	NA	NA
MAGED2	NA	NA	NA	NA	NA	NA	NA	NA	NA	NA	NA	NA	NA	NA	NA	NA	NA	NA	NA	NA	NA	NA	NA	NA	-0.641375	4.65624e-05	-1.90773	1	NA	NA
MAGOHB	NA	NA	NA	NA	NA	NA	NA	NA	NA	NA	NA	NA	NA	NA	NA	NA	NA	NA	NA	NA	NA	NA	NA	NA	NA	NA	-0.900308	1	NA	NA
MALAT1	-6.15415	0	-7.22872	1.18248e-40	-7.2787	2.731e-06	-7.41242	3.23215e-06	NA	NA	NA	NA	-0.578391	1	0.696679	4.33103e-17	NA	NA	NA	NA	-0.480206	1	-0.909762	1	-2.71133	1.47476e-05	-1.57212	1	-2.3256	1.54828e-06
MALT1	-0.483032	1.95598e-52	-0.387725	1	-0.778539	1	-0.373232	1	NA	NA	NA	NA	NA	NA	NA	NA	NA	NA	NA	NA	NA	NA	NA	NA	NA	NA	2.24391	1	0.473078	1
MAMDC2	NA	NA	NA	NA	NA	NA	NA	NA	NA	NA	NA	NA	NA	NA	NA	NA	NA	NA	NA	NA	NA	NA	NA	NA	-0.33493	0.604112	NA	NA	NA	NA
MAML2	NA	NA	NA	NA	NA	NA	NA	NA	NA	NA	NA	NA	NA	NA	-0.454847	1	NA	NA	NA	NA	NA	NA	NA	NA	0.581614	1	2.88688	1	0.818264	0.010151
MAML3	NA	NA	NA	NA	NA	NA	NA	NA	NA	NA	NA	NA	NA	NA	NA	NA	NA	NA	NA	NA	NA	NA	NA	NA	-0.261316	1	NA	NA	NA	NA
MAN2A1	NA	NA	NA	NA	0.4198	1	-0.381901	1	NA	NA	NA	NA	NA	NA	NA	NA	NA	NA	NA	NA	NA	NA	NA	NA	NA	NA	1.43548	1	0.267085	1
MAN2B1	NA	NA	NA	NA	-0.273475	1	NA	NA	NA	NA	NA	NA	NA	NA	NA	NA	NA	NA	NA	NA	NA	NA	NA	NA	NA	NA	NA	NA	NA	NA
MAP1A	NA	NA	NA	NA	NA	NA	-0.29552	1	NA	NA	NA	NA	NA	NA	NA	NA	NA	NA	NA	NA	NA	NA	NA	NA	NA	NA	NA	NA	NA	NA
MAP1LC3B	-0.437014	8.00238e-50	NA	NA	NA	NA	NA	NA	NA	NA	NA	NA	NA	NA	NA	NA	NA	NA	NA	NA	NA	NA	NA	NA	NA	NA	-2.82535	1	-0.507139	1
MAP2K3	-0.691929	1.03347e-84	-0.51371	0.0957879	-0.584685	1	-0.690333	1	NA	NA	NA	NA	NA	NA	NA	NA	NA	NA	NA	NA	NA	NA	NA	NA	-0.296885	1	-0.778924	1	-0.654256	1
MAP3K13	NA	NA	NA	NA	NA	NA	NA	NA	NA	NA	NA	NA	NA	NA	NA	NA	NA	NA	NA	NA	NA	NA	NA	NA	-0.352762	1	NA	NA	NA	NA
MAP3K2	NA	NA	NA	NA	NA	NA	-0.535395	1	NA	NA	NA	NA	NA	NA	NA	NA	NA	NA	NA	NA	NA	NA	NA	NA	NA	NA	1.11452	1	NA	NA
MAP3K5	NA	NA	NA	NA	NA	NA	NA	NA	NA	NA	NA	NA	NA	NA	NA	NA	NA	NA	NA	NA	NA	NA	NA	NA	-0.254957	0.0219583	1.22164	1	0.543071	1
MAP3K7CL	NA	NA	0.58016	2.09139e-06	NA	NA	NA	NA	NA	NA	NA	NA	NA	NA	NA	NA	NA	NA	NA	NA	NA	NA	NA	NA	NA	NA	-3.10352	1	NA	NA
MAP3K8	-0.840699	1.64308e-76	0.269665	1	-0.861062	1	-0.356554	1	NA	NA	NA	NA	NA	NA	NA	NA	NA	NA	NA	NA	NA	NA	0.359981	1	-0.345868	1	NA	NA	-0.391576	1
MAP4K1	NA	NA	NA	NA	-0.356632	1	NA	NA	NA	NA	NA	NA	NA	NA	NA	NA	NA	NA	NA	NA	NA	NA	NA	NA	NA	NA	NA	NA	NA	NA
MAP4K2	NA	NA	NA	NA	NA	NA	NA	NA	NA	NA	NA	NA	NA	NA	NA	NA	NA	NA	NA	NA	NA	NA	NA	NA	NA	NA	-1.82087	1	NA	NA
MAP4K5	NA	NA	NA	NA	NA	NA	NA	NA	NA	NA	NA	NA	NA	NA	NA	NA	NA	NA	NA	NA	NA	NA	NA	NA	NA	NA	-1.52163	1	NA	NA
MAP7	NA	NA	NA	NA	NA	NA	NA	NA	NA	NA	NA	NA	NA	NA	NA	NA	NA	NA	NA	NA	NA	NA	NA	NA	-0.446543	0.000203395	NA	NA	NA	NA
MAP7D3	NA	NA	NA	NA	NA	NA	0.267858	1	NA	NA	NA	NA	NA	NA	NA	NA	NA	NA	NA	NA	NA	NA	NA	NA	-0.262401	1	NA	NA	NA	NA
MAP9	NA	NA	NA	NA	NA	NA	NA	NA	NA	NA	NA	NA	NA	NA	NA	NA	NA	NA	NA	NA	NA	NA	NA	NA	-0.262795	1	NA	NA	NA	NA
MAPK1	0.450081	2.45222e-60	NA	NA	0.274395	1	-0.356795	1	NA	NA	NA	NA	NA	NA	NA	NA	NA	NA	NA	NA	NA	NA	NA	NA	NA	NA	NA	NA	NA	NA
MAPK14	0.831743	5.45795e-153	NA	NA	0.393848	1	NA	NA	NA	NA	NA	NA	NA	NA	NA	NA	NA	NA	NA	NA	NA	NA	NA	NA	-0.366237	0.0321232	0.359375	1	NA	NA
MAPK1IP1L	NA	NA	-0.327684	1	NA	NA	NA	NA	NA	NA	NA	NA	NA	NA	NA	NA	NA	NA	NA	NA	NA	NA	NA	NA	NA	NA	-1.89355	1	NA	NA
MAPKAPK2	-0.276412	3.90267e-51	NA	NA	NA	NA	NA	NA	NA	NA	NA	NA	NA	NA	NA	NA	NA	NA	NA	NA	0.44575	0.0205627	NA	NA	-0.304918	1	-1.20744	1	NA	NA
MAPKAPK3	NA	NA	NA	NA	0.441709	1	NA	NA	NA	NA	NA	NA	NA	NA	NA	NA	NA	NA	NA	NA	NA	NA	NA	NA	-0.276735	1	1.21583	1	NA	NA
MAPRE2	NA	NA	NA	NA	NA	NA	NA	NA	NA	NA	NA	NA	NA	NA	NA	NA	NA	NA	NA	NA	NA	NA	NA	NA	NA	NA	-1.10452	1	-0.532554	1
2001-03-01	-0.357714	1.65947e-36	-0.655437	1.02525e-11	-0.345751	1	-0.316996	1	NA	NA	NA	NA	NA	NA	NA	NA	NA	NA	NA	NA	NA	NA	NA	NA	NA	NA	NA	NA	NA	NA
2002-03-01	-0.304373	6.76307e-36	-0.457037	3.24106e-07	NA	NA	-0.358901	0.0666087	NA	NA	NA	NA	NA	NA	NA	NA	NA	NA	NA	NA	NA	NA	NA	NA	NA	NA	-2.37259	1	NA	NA
2006-03-01	-0.432794	2.5771e-50	-0.418208	2.1625e-08	-0.341115	0.754869	NA	NA	NA	NA	NA	NA	NA	NA	0.315049	1	NA	NA	NA	NA	NA	NA	NA	NA	-0.444545	0.107207	NA	NA	NA	NA
2007-03-01	-0.479978	3.06687e-54	-0.588987	6.41145e-12	-0.406107	0.0246498	-0.333457	0.458129	NA	NA	NA	NA	NA	NA	NA	NA	NA	NA	NA	NA	NA	NA	NA	NA	-0.457028	0.00297413	NA	NA	NA	NA
MARCHF2	0.407135	7.97253e-133	0.782925	7.95989e-20	0.566513	4.51281e-07	NA	NA	NA	NA	NA	NA	NA	NA	-0.260734	1	NA	NA	NA	NA	NA	NA	NA	NA	NA	NA	-3.32987	1	NA	NA
MARCHF6	0.463414	8.08967e-133	0.273678	6.16521e-15	0.257828	0.0560261	NA	NA	NA	NA	NA	NA	NA	NA	-0.535534	0.00167473	NA	NA	NA	NA	NA	NA	NA	NA	NA	NA	0.787238	1	0.422991	1
MARCHF7	0.708987	1.55553e-180	0.583828	1.0549e-18	0.553612	0.00417651	NA	NA	NA	NA	NA	NA	NA	NA	-0.486869	0.0594052	NA	NA	NA	NA	NA	NA	NA	NA	NA	NA	NA	NA	0.29604	1
MARCKS	-0.423169	8.50541e-09	0.305391	1	0.638643	1	NA	NA	NA	NA	NA	NA	NA	NA	NA	NA	NA	NA	-0.312148	0.618445	NA	NA	NA	NA	NA	NA	NA	NA	NA	NA
MARCKSL1	-0.960159	4.78926e-70	-0.302453	1	-1.75096	0.278507	-0.371844	1	NA	NA	NA	NA	-0.279423	1.67769e-07	NA	NA	NA	NA	NA	NA	NA	NA	-0.278093	1	NA	NA	NA	NA	NA	NA
MAT2A	-0.523745	3.2529e-34	NA	NA	-0.987407	0.787075	NA	NA	NA	NA	NA	NA	-0.277403	3.06849e-09	-0.348061	1	NA	NA	NA	NA	NA	NA	NA	NA	-0.647136	2.29818e-05	NA	NA	NA	NA
MATK	NA	NA	NA	NA	NA	NA	NA	NA	NA	NA	NA	NA	-0.307014	8.22304e-12	NA	NA	NA	NA	NA	NA	NA	NA	NA	NA	-0.27999	1	NA	NA	NA	NA
MAVS	NA	NA	NA	NA	NA	NA	NA	NA	NA	NA	NA	NA	NA	NA	NA	NA	NA	NA	NA	NA	NA	NA	NA	NA	NA	NA	-0.905859	1	NA	NA
MAX	NA	NA	NA	NA	NA	NA	NA	NA	NA	NA	NA	NA	NA	NA	NA	NA	NA	NA	NA	NA	NA	NA	NA	NA	NA	NA	-2.35793	1	NA	NA
MAZ	NA	NA	NA	NA	NA	NA	NA	NA	NA	NA	NA	NA	NA	NA	NA	NA	NA	NA	NA	NA	NA	NA	NA	NA	-0.275115	0.177168	NA	NA	NA	NA
MBD2	NA	NA	-0.282827	1	NA	NA	NA	NA	NA	NA	NA	NA	NA	NA	NA	NA	NA	NA	NA	NA	NA	NA	NA	NA	NA	NA	0.457965	1	NA	NA
MBNL1	NA	NA	NA	NA	0.81079	0.000324638	0.261921	1	NA	NA	NA	NA	0.29789	7.40641e-08	-0.488036	1	0.40823	5.34251e-20	NA	NA	NA	NA	0.361764	1	NA	NA	NA	NA	0.558184	0.00599046
MBNL2	NA	NA	-0.271559	1	NA	NA	NA	NA	NA	NA	NA	NA	NA	NA	NA	NA	NA	NA	NA	NA	0.388463	1	NA	NA	NA	NA	1.11452	1	0.448908	1
MBOAT7	0.405104	1.74325e-51	0.36275	0.0132433	0.430598	1	NA	NA	NA	NA	NA	NA	NA	NA	NA	NA	NA	NA	NA	NA	NA	NA	NA	NA	-0.820455	1.41381e-08	NA	NA	NA	NA
MBP	NA	NA	-0.284398	1	-0.728995	1	-0.420813	1	NA	NA	NA	NA	NA	NA	NA	NA	NA	NA	NA	NA	NA	NA	NA	NA	0.420427	0.0827852	0.951763	1	0.738755	0.0123004
MCEMP1	0.744826	6.73333e-97	1.03392	1.44245e-19	0.822706	1	NA	NA	NA	NA	NA	NA	NA	NA	NA	NA	NA	NA	NA	NA	NA	NA	NA	NA	NA	NA	-1.47998	1	NA	NA
MCFD2	NA	NA	NA	NA	NA	NA	NA	NA	NA	NA	NA	NA	NA	NA	NA	NA	NA	NA	NA	NA	NA	NA	NA	NA	-0.306059	1	NA	NA	NA	NA
MCM7	NA	NA	NA	NA	NA	NA	-0.279824	1	NA	NA	NA	NA	NA	NA	NA	NA	NA	NA	NA	NA	NA	NA	0.295725	1	NA	NA	NA	NA	NA	NA
MCOLN2	NA	NA	NA	NA	-0.472223	1	-0.339427	1	NA	NA	NA	NA	NA	NA	NA	NA	NA	NA	NA	NA	NA	NA	0.277933	1	NA	NA	1.11452	1	NA	NA
MCTP1	NA	NA	0.406049	0.00148661	0.256674	1	NA	NA	NA	NA	NA	NA	NA	NA	NA	NA	NA	NA	NA	NA	NA	NA	NA	NA	NA	NA	-1.7149	1	NA	NA
MCTP2	0.854727	4.21749e-182	0.726407	7.76962e-21	0.461411	0.00912256	NA	NA	NA	NA	NA	NA	NA	NA	NA	NA	NA	NA	NA	NA	NA	NA	NA	NA	-0.265941	0.990414	NA	NA	NA	NA
MCTS1	NA	NA	NA	NA	NA	NA	NA	NA	NA	NA	NA	NA	NA	NA	NA	NA	NA	NA	NA	NA	NA	NA	NA	NA	-0.287131	1	NA	NA	NA	NA
MCUB	NA	NA	NA	NA	NA	NA	-0.436811	1	NA	NA	NA	NA	NA	NA	NA	NA	NA	NA	NA	NA	-0.339979	0.00300973	NA	NA	0.55899	1	NA	NA	NA	NA
MCUR1	NA	NA	NA	NA	NA	NA	NA	NA	NA	NA	NA	NA	NA	NA	NA	NA	NA	NA	NA	NA	NA	NA	NA	NA	NA	NA	-2.69849	1	NA	NA
MDH1	-0.329847	7.63369e-42	-0.369328	5.12435e-08	-0.472639	0.0246498	-0.453296	0.0178068	NA	NA	NA	NA	NA	NA	0.272349	0.560659	NA	NA	NA	NA	NA	NA	-0.332244	1	-0.307842	1	NA	NA	NA	NA
MDH2	NA	NA	NA	NA	NA	NA	NA	NA	NA	NA	NA	NA	NA	NA	0.420819	1	NA	NA	NA	NA	NA	NA	-0.260863	1	NA	NA	2.11098	1	NA	NA
MDK	NA	NA	NA	NA	NA	NA	NA	NA	NA	NA	NA	NA	NA	NA	NA	NA	NA	NA	NA	NA	NA	NA	NA	NA	-0.857483	6.7322e-05	NA	NA	NA	NA
MDM1	NA	NA	NA	NA	NA	NA	NA	NA	NA	NA	NA	NA	NA	NA	NA	NA	NA	NA	NA	NA	NA	NA	NA	NA	NA	NA	-2.00751	1	NA	NA
MDM2	NA	NA	NA	NA	0.307399	1	NA	NA	NA	NA	NA	NA	NA	NA	NA	NA	NA	NA	NA	NA	NA	NA	NA	NA	NA	NA	-1.2046	1	NA	NA
MDM4	NA	NA	0.255819	0.178519	0.273529	1	-0.34097	1	NA	NA	NA	NA	NA	NA	NA	NA	NA	NA	NA	NA	NA	NA	NA	NA	-0.519531	0.0826378	1.05588	1	0.474118	0.251073
ME2	0.255504	2.22214e-63	NA	NA	0.416024	1	-0.264436	1	NA	NA	NA	NA	NA	NA	NA	NA	NA	NA	NA	NA	NA	NA	NA	NA	NA	NA	NA	NA	NA	NA
MEA1	NA	NA	NA	NA	NA	NA	NA	NA	NA	NA	NA	NA	NA	NA	NA	NA	NA	NA	NA	NA	NA	NA	NA	NA	-0.286744	1	-0.804807	1	NA	NA
MEAF6	NA	NA	NA	NA	NA	NA	NA	NA	NA	NA	NA	NA	NA	NA	NA	NA	NA	NA	NA	NA	NA	NA	NA	NA	-0.36618	0.00446078	0.698489	1	NA	NA
MED12L	NA	NA	NA	NA	NA	NA	NA	NA	NA	NA	NA	NA	NA	NA	NA	NA	NA	NA	NA	NA	NA	NA	NA	NA	-0.345102	1	NA	NA	NA	NA
MED13L	0.422304	4.13073e-50	NA	NA	0.564005	0.896883	NA	NA	NA	NA	NA	NA	NA	NA	-0.317756	1	NA	NA	NA	NA	NA	NA	NA	NA	NA	NA	2.50104	1	0.288397	1
MED19	NA	NA	NA	NA	NA	NA	NA	NA	NA	NA	NA	NA	NA	NA	-0.37023	1	NA	NA	NA	NA	NA	NA	NA	NA	NA	NA	NA	NA	NA	NA
MED21	NA	NA	NA	NA	NA	NA	NA	NA	NA	NA	NA	NA	NA	NA	-0.352266	1	NA	NA	NA	NA	NA	NA	NA	NA	NA	NA	0.665432	1	NA	NA
MED28	NA	NA	NA	NA	NA	NA	NA	NA	NA	NA	NA	NA	NA	NA	NA	NA	NA	NA	NA	NA	NA	NA	-0.27652	1	NA	NA	NA	NA	NA	NA
MEF2C	NA	NA	NA	NA	NA	NA	0.515385	1	NA	NA	NA	NA	NA	NA	NA	NA	NA	NA	NA	NA	NA	NA	NA	NA	-0.312818	1	NA	NA	NA	NA
MEF2D	NA	NA	-0.460612	0.15665	NA	NA	NA	NA	NA	NA	NA	NA	NA	NA	-0.274043	1	NA	NA	NA	NA	NA	NA	NA	NA	NA	NA	NA	NA	NA	NA
MEIS1	NA	NA	NA	NA	NA	NA	NA	NA	NA	NA	NA	NA	NA	NA	NA	NA	NA	NA	NA	NA	NA	NA	NA	NA	NA	NA	-0.57519	1	NA	NA
MESD	0.256996	2.10766e-62	0.345436	0.043811	0.310879	1	NA	NA	NA	NA	NA	NA	NA	NA	NA	NA	NA	NA	NA	NA	NA	NA	NA	NA	-0.398817	0.331353	2.39273	1	NA	NA
MEST	NA	NA	NA	NA	NA	NA	NA	NA	NA	NA	NA	NA	NA	NA	NA	NA	NA	NA	NA	NA	NA	NA	NA	NA	-0.416955	0.0269592	NA	NA	NA	NA
METRNL	-0.819932	1.20939e-113	-0.719711	3.46967e-07	-0.561195	1	-0.454125	1	NA	NA	-0.46	3.08298e-36	-0.435842	5.47522e-16	NA	NA	-0.486777	9.53604e-52	-0.326061	0.016648	-0.348773	1	-0.564467	0.467301	-0.295264	0.00138226	NA	NA	-0.750448	0.0197932
METTL22	NA	NA	NA	NA	NA	NA	NA	NA	NA	NA	NA	NA	NA	NA	NA	NA	NA	NA	NA	NA	NA	NA	NA	NA	NA	NA	-1.33533	1	NA	NA
METTL23	NA	NA	NA	NA	NA	NA	NA	NA	NA	NA	NA	NA	NA	NA	NA	NA	NA	NA	NA	NA	NA	NA	NA	NA	-0.257873	0.0198483	NA	NA	NA	NA
METTL26	NA	NA	NA	NA	NA	NA	0.444812	1	NA	NA	NA	NA	NA	NA	NA	NA	NA	NA	NA	NA	NA	NA	NA	NA	NA	NA	-0.657125	1	NA	NA
MEX3C	NA	NA	NA	NA	NA	NA	-0.322318	1	NA	NA	NA	NA	NA	NA	NA	NA	NA	NA	NA	NA	NA	NA	NA	NA	NA	NA	NA	NA	NA	NA
MFAP3L	NA	NA	NA	NA	NA	NA	NA	NA	NA	NA	NA	NA	NA	NA	NA	NA	NA	NA	NA	NA	NA	NA	NA	NA	NA	NA	-0.322934	1	NA	NA
MFF	NA	NA	NA	NA	0.274973	1	NA	NA	NA	NA	NA	NA	NA	NA	NA	NA	NA	NA	NA	NA	-0.396387	0.845822	NA	NA	NA	NA	-0.654898	1	NA	NA
MFSD1	0.422038	3.49174e-67	0.58068	2.67201e-05	0.453156	1	NA	NA	NA	NA	NA	NA	NA	NA	NA	NA	NA	NA	NA	NA	NA	NA	NA	NA	NA	NA	-1.60605	1	NA	NA
MFSD12	NA	NA	-0.314274	0.12342	NA	NA	NA	NA	NA	NA	NA	NA	NA	NA	NA	NA	NA	NA	NA	NA	NA	NA	NA	NA	NA	NA	NA	NA	NA	NA
MFSD2A	-0.294031	5.14528e-10	NA	NA	NA	NA	NA	NA	NA	NA	NA	NA	NA	NA	NA	NA	NA	NA	NA	NA	NA	NA	NA	NA	NA	NA	1.572	1	NA	NA
MGAT4B	NA	NA	NA	NA	NA	NA	NA	NA	NA	NA	NA	NA	NA	NA	NA	NA	NA	NA	NA	NA	NA	NA	NA	NA	-0.266545	1	-1.25774	1	NA	NA
MGLL	NA	NA	NA	NA	NA	NA	NA	NA	NA	NA	NA	NA	NA	NA	NA	NA	NA	NA	NA	NA	NA	NA	NA	NA	-0.280069	1	-0.561876	1	NA	NA
MGMT	NA	NA	-0.27327	1	NA	NA	NA	NA	NA	NA	NA	NA	NA	NA	NA	NA	NA	NA	NA	NA	NA	NA	NA	NA	-0.403188	0.339598	NA	NA	-0.367213	1
MGST1	0.861554	2.0902e-101	0.718467	3.69031e-18	1.43092	2.02461e-11	NA	NA	NA	NA	NA	NA	NA	NA	NA	NA	NA	NA	NA	NA	NA	NA	NA	NA	-0.476507	0.00112122	NA	NA	NA	NA
MGST2	NA	NA	NA	NA	NA	NA	NA	NA	NA	NA	NA	NA	NA	NA	NA	NA	NA	NA	NA	NA	NA	NA	NA	NA	-0.39287	0.0241881	NA	NA	NA	NA
MGST3	NA	NA	NA	NA	0.569104	0.35669	-0.446328	1	NA	NA	NA	NA	NA	NA	NA	NA	NA	NA	NA	NA	-0.29219	1	NA	NA	-0.406631	0.0166105	NA	NA	NA	NA
MIA2	NA	NA	NA	NA	NA	NA	NA	NA	NA	NA	NA	NA	NA	NA	NA	NA	NA	NA	NA	NA	NA	NA	NA	NA	-0.272013	1	1.21461	1	0.294206	1
MIB1	NA	NA	NA	NA	NA	NA	NA	NA	NA	NA	NA	NA	NA	NA	NA	NA	NA	NA	NA	NA	NA	NA	NA	NA	-0.367753	1	NA	NA	NA	NA
MICOS10	1.19788	3.31738e-278	1.30373	1.4263e-37	1.10976	2.40983e-07	0.562996	1	NA	NA	NA	NA	NA	NA	-0.664259	3.68012e-06	NA	NA	NA	NA	0.262428	0.075299	0.27237	1	0.359866	1	NA	NA	NA	NA
MICOS13	0.538828	1.66019e-154	0.505973	3.70474e-16	0.464329	0.00185544	0.546144	1	NA	NA	NA	NA	NA	NA	-0.474996	0.00121754	NA	NA	NA	NA	NA	NA	NA	NA	0.43884	1	NA	NA	NA	NA
MICU1	NA	NA	0.416269	0.00762695	0.501079	0.001405	NA	NA	NA	NA	NA	NA	NA	NA	NA	NA	NA	NA	NA	NA	NA	NA	NA	NA	NA	NA	-1.78739	1	NA	NA
MID1IP1	NA	NA	-0.286593	1	0.550883	1	NA	NA	NA	NA	NA	NA	NA	NA	NA	NA	NA	NA	NA	NA	NA	NA	NA	NA	NA	NA	NA	NA	NA	NA
MIDN	-0.280646	1.17379e-23	NA	NA	-0.43756	1	-0.31902	1	NA	NA	-0.30754	2.66116e-35	-0.476972	2.27365e-24	NA	NA	-0.347174	1.72937e-23	NA	NA	NA	NA	-0.336444	1	-0.659694	0.0470893	-1.36771	1	-0.444257	0.548098
MIEN1	NA	NA	NA	NA	NA	NA	-0.259241	1	NA	NA	NA	NA	NA	NA	NA	NA	NA	NA	NA	NA	NA	NA	NA	NA	NA	NA	NA	NA	NA	NA
MIER1	NA	NA	NA	NA	0.299429	1	NA	NA	NA	NA	NA	NA	NA	NA	NA	NA	NA	NA	NA	NA	NA	NA	0.253517	1	NA	NA	-0.64937	1	NA	NA
MIF4GD	NA	NA	NA	NA	-0.340135	1	NA	NA	NA	NA	NA	NA	NA	NA	NA	NA	NA	NA	NA	NA	NA	NA	NA	NA	NA	NA	NA	NA	NA	NA
MINDY1	NA	NA	NA	NA	NA	NA	NA	NA	NA	NA	NA	NA	NA	NA	NA	NA	NA	NA	NA	NA	NA	NA	NA	NA	NA	NA	-2.29113	1	NA	NA
MINOS1	-0.895879	1.35131e-111	-0.788311	9.53397e-27	-0.763419	8.02992e-05	-0.489119	0.0666087	NA	NA	NA	NA	NA	NA	0.687858	8.92345e-06	NA	NA	NA	NA	NA	NA	-0.298338	1	-0.302847	1	NA	NA	NA	NA
MIR155HG	NA	NA	-0.486662	0.00656194	NA	NA	NA	NA	NA	NA	NA	NA	NA	NA	NA	NA	NA	NA	NA	NA	NA	NA	NA	NA	NA	NA	NA	NA	NA	NA
MIR222HG	-0.64673	5.85992e-65	-0.314749	0.00139635	NA	NA	NA	NA	NA	NA	NA	NA	NA	NA	NA	NA	NA	NA	NA	NA	NA	NA	NA	NA	NA	NA	NA	NA	NA	NA
MIR22HG	-1.13903	6.57155e-131	-1.00725	1.60669e-19	-0.992021	0.000150567	-0.298699	0.458129	NA	NA	NA	NA	NA	NA	NA	NA	NA	NA	NA	NA	NA	NA	NA	NA	NA	NA	NA	NA	NA	NA
MIR29B2CHG	NA	NA	-0.622254	9.05744e-09	NA	NA	NA	NA	NA	NA	NA	NA	NA	NA	NA	NA	NA	NA	NA	NA	NA	NA	NA	NA	NA	NA	NA	NA	NA	NA
MIR3945HG	-0.661626	3.00449e-65	-0.548683	1.20538e-07	NA	NA	NA	NA	NA	NA	NA	NA	NA	NA	NA	NA	NA	NA	NA	NA	NA	NA	NA	NA	NA	NA	NA	NA	NA	NA
MIR4435-2HG	-0.875318	7.21633e-99	-0.280619	0.314102	-0.441068	0.473916	NA	NA	NA	NA	NA	NA	NA	NA	NA	NA	NA	NA	NA	NA	NA	NA	NA	NA	NA	NA	-1.29993	1	NA	NA
MIS18BP1	NA	NA	NA	NA	NA	NA	NA	NA	NA	NA	NA	NA	NA	NA	NA	NA	NA	NA	NA	NA	NA	NA	NA	NA	-0.297954	0.0749872	-1.05792	1	NA	NA
MISP3	NA	NA	NA	NA	NA	NA	NA	NA	NA	NA	NA	NA	NA	NA	NA	NA	NA	NA	NA	NA	NA	NA	NA	NA	NA	NA	-0.970026	1	NA	NA
MKLN1	NA	NA	NA	NA	NA	NA	NA	NA	NA	NA	NA	NA	NA	NA	-0.301377	1	NA	NA	NA	NA	NA	NA	NA	NA	NA	NA	NA	NA	0.3144	1
MKNK1	NA	NA	0.341799	0.168063	0.398233	0.00972887	NA	NA	NA	NA	NA	NA	NA	NA	NA	NA	NA	NA	NA	NA	NA	NA	NA	NA	NA	NA	-1.02357	1	NA	NA
MKNK2	NA	NA	NA	NA	-0.419208	1	NA	NA	NA	NA	NA	NA	NA	NA	NA	NA	NA	NA	NA	NA	NA	NA	NA	NA	NA	NA	NA	NA	NA	NA
MKRN1	NA	NA	NA	NA	NA	NA	-0.274961	1	NA	NA	NA	NA	NA	NA	NA	NA	NA	NA	NA	NA	NA	NA	NA	NA	NA	NA	-1.81014	1	NA	NA
MLF2	NA	NA	NA	NA	NA	NA	NA	NA	NA	NA	NA	NA	NA	NA	NA	NA	NA	NA	NA	NA	NA	NA	NA	NA	-0.548641	1.0801e-05	0.622453	1	NA	NA
MLH3	NA	NA	NA	NA	NA	NA	NA	NA	NA	NA	NA	NA	NA	NA	NA	NA	NA	NA	NA	NA	NA	NA	NA	NA	NA	NA	-1.06107	1	NA	NA
MLLT3	NA	NA	NA	NA	NA	NA	NA	NA	NA	NA	NA	NA	NA	NA	NA	NA	NA	NA	NA	NA	NA	NA	NA	NA	-0.264357	1	NA	NA	0.46519	1
MMADHC	NA	NA	NA	NA	NA	NA	-0.339997	1	NA	NA	NA	NA	NA	NA	NA	NA	NA	NA	NA	NA	NA	NA	NA	NA	-0.359095	0.0111872	NA	NA	NA	NA
MMD	NA	NA	NA	NA	NA	NA	NA	NA	NA	NA	NA	NA	NA	NA	NA	NA	NA	NA	NA	NA	NA	NA	NA	NA	NA	NA	-3.08562	1	NA	NA
MMP24OS	NA	NA	-0.263152	1	0.25233	1	-0.363165	1	NA	NA	NA	NA	NA	NA	NA	NA	NA	NA	NA	NA	NA	NA	NA	NA	NA	NA	-2.08066	1	NA	NA
MMRN1	NA	NA	NA	NA	NA	NA	NA	NA	NA	NA	NA	NA	NA	NA	NA	NA	NA	NA	NA	NA	NA	NA	NA	NA	-0.277796	1	-2.28102	1	NA	NA
MOAP1	-0.362085	9.40763e-38	NA	NA	NA	NA	NA	NA	NA	NA	NA	NA	NA	NA	NA	NA	NA	NA	NA	NA	NA	NA	NA	NA	NA	NA	NA	NA	NA	NA
MOB1A	0.308401	5.40875e-32	0.494058	0.00263941	0.611039	0.397054	-0.272958	1	NA	NA	NA	NA	NA	NA	-0.377863	1	NA	NA	NA	NA	NA	NA	NA	NA	NA	NA	-0.629594	1	NA	NA
MOB1B	NA	NA	NA	NA	NA	NA	-0.332742	1	NA	NA	NA	NA	NA	NA	NA	NA	NA	NA	NA	NA	NA	NA	NA	NA	NA	NA	NA	NA	NA	NA
MOB2	NA	NA	NA	NA	NA	NA	NA	NA	NA	NA	NA	NA	NA	NA	NA	NA	NA	NA	NA	NA	NA	NA	NA	NA	NA	NA	-0.960175	1	NA	NA
MOB3A	NA	NA	NA	NA	-0.424773	1	NA	NA	NA	NA	NA	NA	NA	NA	NA	NA	NA	NA	NA	NA	NA	NA	NA	NA	NA	NA	NA	NA	-0.322847	1
MORC3	NA	NA	NA	NA	NA	NA	0.373858	1	NA	NA	NA	NA	NA	NA	-0.458446	1	NA	NA	NA	NA	NA	NA	NA	NA	NA	NA	2.08255	1	0.316081	1
MORF4L2	NA	NA	NA	NA	NA	NA	NA	NA	NA	NA	NA	NA	NA	NA	NA	NA	NA	NA	NA	NA	NA	NA	NA	NA	-0.517947	0.000721492	NA	NA	-0.390755	1
MPC1	NA	NA	-0.386301	1	NA	NA	NA	NA	NA	NA	NA	NA	NA	NA	NA	NA	NA	NA	NA	NA	NA	NA	-0.309471	1	NA	NA	NA	NA	NA	NA
MPC2	NA	NA	NA	NA	NA	NA	NA	NA	NA	NA	NA	NA	NA	NA	NA	NA	NA	NA	NA	NA	NA	NA	NA	NA	-0.394216	0.0168755	NA	NA	-0.45609	0.0044952
MPG	NA	NA	NA	NA	NA	NA	NA	NA	NA	NA	NA	NA	NA	NA	NA	NA	NA	NA	NA	NA	NA	NA	NA	NA	-0.531092	0.0179893	NA	NA	NA	NA
MPHOSPH8	NA	NA	NA	NA	NA	NA	NA	NA	NA	NA	NA	NA	NA	NA	-0.294152	1	NA	NA	NA	NA	NA	NA	NA	NA	NA	NA	1.96374	1	0.598873	0.0287314
MPIG6B	NA	NA	NA	NA	NA	NA	NA	NA	NA	NA	NA	NA	NA	NA	NA	NA	NA	NA	NA	NA	NA	NA	NA	NA	NA	NA	-3.98298	1	NA	NA
MPL	NA	NA	NA	NA	NA	NA	NA	NA	NA	NA	NA	NA	NA	NA	NA	NA	NA	NA	NA	NA	NA	NA	NA	NA	NA	NA	-1.84222	1	NA	NA
MPP1	NA	NA	NA	NA	0.6505	0.000322517	0.409159	1	NA	NA	NA	NA	NA	NA	NA	NA	NA	NA	NA	NA	NA	NA	NA	NA	-0.837823	7.67756e-07	-2.0512	1	NA	NA
MPRIP	NA	NA	NA	NA	NA	NA	-0.416708	1	NA	NA	NA	NA	NA	NA	NA	NA	NA	NA	NA	NA	NA	NA	NA	NA	NA	NA	1.78676	1	0.72421	0.624055
MPST	NA	NA	NA	NA	-0.31267	1	NA	NA	NA	NA	NA	NA	NA	NA	NA	NA	NA	NA	NA	NA	NA	NA	NA	NA	-0.349698	0.386189	-1.10044	1	NA	NA
MRNIP	NA	NA	NA	NA	NA	NA	-0.261579	1	NA	NA	NA	NA	NA	NA	NA	NA	NA	NA	NA	NA	NA	NA	NA	NA	NA	NA	NA	NA	NA	NA
MRPL14	NA	NA	NA	NA	0.381418	1	NA	NA	NA	NA	NA	NA	NA	NA	NA	NA	NA	NA	NA	NA	NA	NA	NA	NA	NA	NA	-0.700432	1	NA	NA
MRPL23	NA	NA	NA	NA	NA	NA	NA	NA	NA	NA	NA	NA	NA	NA	0.260367	1	NA	NA	NA	NA	NA	NA	NA	NA	-0.283003	0.0763333	0.281263	1	NA	NA
MRPL33	0.372158	2.5533e-55	0.277528	1	0.559436	1	0.44665	1	NA	NA	NA	NA	NA	NA	NA	NA	NA	NA	NA	NA	NA	NA	NA	NA	NA	NA	-1.13902	1	NA	NA
MRPL51	0.380558	4.78555e-86	0.476132	0.00203881	0.554557	0.373103	NA	NA	NA	NA	NA	NA	NA	NA	NA	NA	NA	NA	NA	NA	NA	NA	NA	NA	-0.393927	0.0115219	0.47123	1	NA	NA
MRPL52	0.471993	5.47791e-89	0.617007	1.55451e-05	0.694284	0.0507015	NA	NA	NA	NA	NA	NA	NA	NA	0.449138	0.136764	NA	NA	NA	NA	0.3046	1	0.277724	1	-0.268446	1	1.22424	1	NA	NA
MRPL55	NA	NA	NA	NA	-0.367405	1	NA	NA	NA	NA	NA	NA	NA	NA	NA	NA	NA	NA	NA	NA	NA	NA	NA	NA	0.285749	1	NA	NA	NA	NA
MRPS6	NA	NA	NA	NA	NA	NA	NA	NA	NA	NA	NA	NA	NA	NA	-0.33589	1	NA	NA	NA	NA	NA	NA	NA	NA	NA	NA	NA	NA	-0.361672	1
MS4A1	NA	NA	NA	NA	NA	NA	NA	NA	NA	NA	NA	NA	NA	NA	NA	NA	NA	NA	-0.272787	9.97075e-07	-0.734796	0.62933	NA	NA	NA	NA	NA	NA	NA	NA
MS4A7	-0.453354	2.57193e-29	-0.791324	8.90495e-07	-0.430532	1	NA	NA	NA	NA	NA	NA	NA	NA	NA	NA	NA	NA	NA	NA	NA	NA	NA	NA	NA	NA	NA	NA	NA	NA
MSANTD3	NA	NA	NA	NA	NA	NA	NA	NA	NA	NA	NA	NA	NA	NA	NA	NA	NA	NA	NA	NA	NA	NA	NA	NA	NA	NA	-2.25816	1	NA	NA
MSC	-0.338961	5.91544e-15	NA	NA	NA	NA	NA	NA	NA	NA	NA	NA	NA	NA	NA	NA	NA	NA	NA	NA	NA	NA	NA	NA	NA	NA	NA	NA	NA	NA
MSH6	NA	NA	-0.506898	0.0810741	NA	NA	NA	NA	NA	NA	NA	NA	NA	NA	NA	NA	NA	NA	NA	NA	NA	NA	0.264244	1	NA	NA	NA	NA	0.366976	1
MSI2	NA	NA	NA	NA	NA	NA	NA	NA	NA	NA	NA	NA	NA	NA	NA	NA	NA	NA	NA	NA	0.36927	1	NA	NA	-0.705213	1.63355e-05	1.21461	1	0.442699	1
MSL3	NA	NA	NA	NA	NA	NA	0.518013	1	NA	NA	NA	NA	NA	NA	-0.445804	1	NA	NA	NA	NA	NA	NA	NA	NA	0.3562	1	2.20652	1	0.513014	1
MSN	0.320771	9.64375e-17	NA	NA	0.617796	0.3594	NA	NA	NA	NA	NA	NA	NA	NA	-0.326697	1	NA	NA	NA	NA	NA	NA	NA	NA	-0.411246	0.254172	NA	NA	-0.474158	1
MSR1	NA	NA	-1.00677	9.5687e-11	NA	NA	NA	NA	NA	NA	NA	NA	NA	NA	NA	NA	NA	NA	NA	NA	NA	NA	NA	NA	NA	NA	NA	NA	NA	NA
MSRB3	NA	NA	NA	NA	NA	NA	NA	NA	NA	NA	NA	NA	NA	NA	NA	NA	NA	NA	NA	NA	NA	NA	NA	NA	-0.635457	0.000188837	NA	NA	NA	NA
MT-ATP6	0.542459	2.44323e-52	-0.276687	1	NA	NA	0.476905	1	NA	NA	NA	NA	NA	NA	-1.6228	4.2457e-39	NA	NA	NA	NA	NA	NA	NA	NA	0.809225	1.68994e-07	1.22994	1	0.284375	1
MT-ATP8	0.560646	2.29714e-105	0.3724	0.00209967	0.744078	0.00586696	0.81063	0.615049	0.529561	0	0.469955	1.21221e-134	0.461637	6.54223e-36	NA	NA	0.399964	9.31183e-26	0.53183	2.13172e-28	0.624776	4.51807e-06	0.49394	0.00876958	NA	NA	0.541966	1	1.01029	0.000126348
MT-CO1	NA	NA	-0.27419	1	-0.317727	1	NA	NA	-0.3493	0	-0.43521	6.6721e-193	-0.294777	6.9839e-36	-1.50814	1.03778e-33	-0.272496	3.82222e-55	-0.442475	3.73151e-46	-0.344647	0.360186	-0.3695	0.00226815	NA	NA	NA	NA	-0.552371	5.31492e-09
MT-CO2	0.580957	2.98368e-68	NA	NA	NA	NA	NA	NA	NA	NA	NA	NA	NA	NA	-1.28477	3.15612e-28	NA	NA	NA	NA	NA	NA	NA	NA	0.286225	1	0.840427	1	NA	NA
MT-CO3	0.347605	9.86793e-30	NA	NA	NA	NA	NA	NA	-0.397451	0	-0.415586	1.8455e-178	-0.299441	1.14302e-26	-1.75204	4.48802e-35	NA	NA	-0.396285	6.40806e-31	-0.422787	0.0139226	NA	NA	NA	NA	0.268797	1	NA	NA
MT-CYB	0.604155	2.43828e-62	NA	NA	NA	NA	0.512828	1	NA	NA	NA	NA	NA	NA	-1.45854	9.42943e-30	NA	NA	NA	NA	NA	NA	NA	NA	0.50207	0.00766351	1.68957	1	0.391907	0.000252595
MT-ND1	NA	NA	NA	NA	0.377423	1	0.392358	1	NA	NA	NA	NA	NA	NA	-1.64726	2.38658e-28	NA	NA	NA	NA	NA	NA	NA	NA	0.390124	1	0.992122	1	0.65662	5.80545e-12
MT-ND2	0.430483	2.35542e-32	NA	NA	0.706985	1	0.484304	1	0.627215	0	0.533988	2.8498e-134	0.400327	3.04367e-22	-1.08161	1.73441e-13	0.588438	8.55359e-48	0.527568	2.19396e-27	0.661263	0.0621053	0.791159	7.6485e-05	0.662877	1.55881e-05	0.838056	1	1.05109	1.83101e-30
MT-ND3	0.458165	1.26377e-39	0.3241	1	0.560583	0.849362	0.858539	2.30129e-05	0.27888	8.27483e-84	NA	NA	NA	NA	-1.4469	1.07641e-26	0.255413	9.31483e-07	NA	NA	NA	NA	0.408422	1	NA	NA	1.59579	1	0.654285	2.37808e-09
MT-ND4	0.396408	1.20556e-30	NA	NA	NA	NA	0.452377	1	NA	NA	NA	NA	NA	NA	-1.32817	4.77331e-24	0.282877	1.02984e-11	NA	NA	NA	NA	NA	NA	0.554976	0.000466085	1.27411	1	0.438647	5.87079e-05
MT-ND4L	0.552373	1.63154e-72	0.42634	1	0.729191	1	0.816886	1	0.746596	0	0.559163	9.78256e-123	0.530381	4.99393e-25	-0.444978	0.176749	0.530695	5.07682e-30	0.585089	1.31027e-30	0.563684	0.034036	0.645135	0.000111594	0.445067	0.294122	1.2322	1	1.24936	2.60227e-16
MT-ND5	0.650754	1.72692e-63	0.270464	1	0.364747	1	0.632896	1	0.510125	1.05232e-258	NA	NA	NA	NA	-1.30786	1.88387e-13	0.302349	5.01287e-07	NA	NA	0.4891	1	0.437056	1	0.59127	0.650864	2.14227	1	0.614246	1.98056e-08
MT-ND6	0.353519	7.7795e-75	NA	NA	0.530983	1	NA	NA	NA	NA	NA	NA	NA	NA	-0.449887	1	NA	NA	NA	NA	-0.311401	1	NA	NA	NA	NA	1.38873	1	0.415489	1
MTA1	NA	NA	NA	NA	NA	NA	NA	NA	NA	NA	NA	NA	NA	NA	NA	NA	NA	NA	NA	NA	NA	NA	NA	NA	-0.28791	1	NA	NA	NA	NA
MTCH1	0.278346	7.06538e-62	NA	NA	0.323783	1	-0.429932	1	NA	NA	NA	NA	NA	NA	NA	NA	NA	NA	NA	NA	NA	NA	NA	NA	NA	NA	1.11452	1	0.782442	0.608273
MTDH	0.343544	3.84921e-28	NA	NA	0.497609	1	NA	NA	NA	NA	NA	NA	NA	NA	NA	NA	NA	NA	NA	NA	NA	NA	NA	NA	-0.455307	0.0947558	-0.814267	1	NA	NA
MTERF4	NA	NA	NA	NA	NA	NA	NA	NA	NA	NA	NA	NA	NA	NA	NA	NA	NA	NA	NA	NA	NA	NA	NA	NA	0.308868	1	-0.842256	1	0.66133	0.990602
MTF2	NA	NA	NA	NA	NA	NA	NA	NA	NA	NA	NA	NA	NA	NA	NA	NA	NA	NA	NA	NA	NA	NA	NA	NA	-0.456691	1	1.94294	1	NA	NA
MTFR1L	NA	NA	NA	NA	NA	NA	NA	NA	NA	NA	NA	NA	NA	NA	NA	NA	NA	NA	NA	NA	NA	NA	NA	NA	NA	NA	-0.878957	1	NA	NA
MTHFD1L	NA	NA	NA	NA	-0.26188	1	NA	NA	NA	NA	NA	NA	NA	NA	NA	NA	NA	NA	NA	NA	NA	NA	NA	NA	NA	NA	NA	NA	NA	NA
MTHFD2L	NA	NA	NA	NA	NA	NA	NA	NA	NA	NA	NA	NA	NA	NA	NA	NA	NA	NA	NA	NA	NA	NA	NA	NA	-0.307744	0.018804	1.74693	1	NA	NA
MTIF3	NA	NA	NA	NA	NA	NA	NA	NA	NA	NA	NA	NA	NA	NA	NA	NA	NA	NA	NA	NA	NA	NA	-0.271154	1	NA	NA	NA	NA	NA	NA
MTLN	NA	NA	0.250141	2.56577e-07	0.393224	0.260047	NA	NA	NA	NA	NA	NA	NA	NA	-0.292095	0.101686	NA	NA	NA	NA	NA	NA	NA	NA	NA	NA	NA	NA	NA	NA
MTPN	0.334712	4.90739e-23	NA	NA	0.253074	1	NA	NA	NA	NA	NA	NA	NA	NA	NA	NA	NA	NA	NA	NA	NA	NA	NA	NA	-0.304168	0.314279	-1.30022	1	NA	NA
MTR	NA	NA	NA	NA	NA	NA	NA	NA	NA	NA	NA	NA	NA	NA	-0.34699	1	NA	NA	NA	NA	NA	NA	NA	NA	NA	NA	0.885237	1	0.57408	0.183602
MTRF1L	NA	NA	NA	NA	NA	NA	NA	NA	NA	NA	NA	NA	NA	NA	NA	NA	NA	NA	NA	NA	NA	NA	NA	NA	NA	NA	-0.544983	1	NA	NA
MTRNR2L12	0.765032	5.01231e-94	NA	NA	NA	NA	1.42	7.21623e-09	1.07066	0	0.75587	3.18313e-167	0.712488	1.15378e-56	-1.05114	1.60462e-10	0.818025	6.16696e-51	0.517539	1.3996e-14	0.285894	1	0.823891	6.63315e-06	1.05856	1.38814e-05	1.7291	1	1.69041	5.62635e-48
MTURN	NA	NA	NA	NA	NA	NA	NA	NA	NA	NA	NA	NA	NA	NA	NA	NA	NA	NA	NA	NA	NA	NA	NA	NA	-1.03813	1.10032e-13	-3.98014	1	NA	NA
MUC20-OT1	-0.264431	1.58649e-27	-0.356295	1.76459e-05	-0.370153	1	-0.397231	1	NA	NA	NA	NA	NA	NA	0.338681	1	NA	NA	NA	NA	NA	NA	NA	NA	NA	NA	NA	NA	NA	NA
MX1	-0.554715	2.54774e-29	-0.310144	1	-0.507482	1	-1.1391	0.00904135	NA	NA	NA	NA	NA	NA	NA	NA	NA	NA	NA	NA	-0.300428	1	-0.27762	1	NA	NA	NA	NA	0.449907	1
MX2	-0.291901	4.32928e-54	-0.618885	0.000777899	NA	NA	NA	NA	NA	NA	NA	NA	NA	NA	NA	NA	NA	NA	NA	NA	NA	NA	NA	NA	0.323707	1	2.20652	1	0.849151	0.259647
MXD1	NA	NA	NA	NA	NA	NA	NA	NA	NA	NA	NA	NA	NA	NA	-0.277246	1	NA	NA	NA	NA	NA	NA	0.301027	1	NA	NA	NA	NA	NA	NA
MXD4	NA	NA	-0.388838	0.409204	-0.374519	1	-0.533088	1	NA	NA	NA	NA	NA	NA	0.37611	1	NA	NA	NA	NA	NA	NA	NA	NA	NA	NA	NA	NA	-0.335482	1
MYADM	0.775131	8.46062e-75	0.320846	1	0.396884	1	-0.356245	1	NA	NA	NA	NA	-0.338772	5.65003e-12	NA	NA	NA	NA	NA	NA	NA	NA	NA	NA	-0.754346	0.000494556	NA	NA	-0.262329	4.74382e-06
MYB	NA	NA	NA	NA	NA	NA	NA	NA	NA	NA	NA	NA	NA	NA	NA	NA	NA	NA	NA	NA	NA	NA	NA	NA	-0.348238	1	NA	NA	NA	NA
MYBL2	NA	NA	NA	NA	NA	NA	-0.343689	1	NA	NA	NA	NA	NA	NA	NA	NA	NA	NA	NA	NA	NA	NA	NA	NA	NA	NA	NA	NA	NA	NA
MYCBP2	NA	NA	NA	NA	0.421807	1	NA	NA	NA	NA	NA	NA	NA	NA	-0.343661	1	NA	NA	NA	NA	NA	NA	NA	NA	NA	NA	NA	NA	0.858757	0.000342526
MYCT1	NA	NA	NA	NA	NA	NA	NA	NA	NA	NA	NA	NA	NA	NA	NA	NA	NA	NA	NA	NA	NA	NA	NA	NA	-0.370464	7.72128e-05	NA	NA	NA	NA
MYEF2	NA	NA	NA	NA	NA	NA	-0.257441	1	NA	NA	NA	NA	NA	NA	NA	NA	NA	NA	NA	NA	NA	NA	NA	NA	-0.271693	0.881769	NA	NA	NA	NA
MYH9	NA	NA	NA	NA	NA	NA	NA	NA	NA	NA	NA	NA	NA	NA	NA	NA	0.438176	1.3002e-22	NA	NA	NA	NA	0.407647	1	NA	NA	-1.74827	1	0.518434	1
MYL12A	NA	NA	NA	NA	-0.632981	1	-0.39817	1	NA	NA	-0.418411	4.46558e-63	-0.400378	2.69731e-23	-0.414169	1	-0.458428	3.40207e-40	NA	NA	-0.579036	0.000413803	-0.272553	1	-0.534069	0.0133407	-3.61015	1	-0.585969	0.000449511
MYL12B	NA	NA	NA	NA	NA	NA	NA	NA	NA	NA	NA	NA	NA	NA	NA	NA	NA	NA	NA	NA	-0.304444	1	NA	NA	NA	NA	-1.45371	1	NA	NA
MYL6	0.396563	8.93558e-34	0.620555	1.64312e-14	NA	NA	NA	NA	NA	NA	NA	NA	NA	NA	NA	NA	NA	NA	NA	NA	NA	NA	NA	NA	NA	NA	-2.3668	1	-0.269872	0.0233326
MYL6B	NA	NA	NA	NA	NA	NA	NA	NA	NA	NA	NA	NA	NA	NA	NA	NA	NA	NA	NA	NA	NA	NA	NA	NA	-0.4689	0.0124689	NA	NA	NA	NA
MYLIP	NA	NA	-0.539211	0.0645928	-0.266639	1	NA	NA	NA	NA	NA	NA	NA	NA	NA	NA	0.280456	1.45692e-18	NA	NA	NA	NA	NA	NA	0.590245	1	NA	NA	NA	NA
MYO1C	NA	NA	NA	NA	NA	NA	NA	NA	NA	NA	NA	NA	NA	NA	NA	NA	NA	NA	NA	NA	NA	NA	NA	NA	NA	NA	-1.19291	1	NA	NA
MYO9B	-0.340592	1.57259e-57	NA	NA	NA	NA	NA	NA	NA	NA	NA	NA	NA	NA	NA	NA	NA	NA	NA	NA	NA	NA	NA	NA	NA	NA	NA	NA	NA	NA
MZB1	NA	NA	NA	NA	NA	NA	NA	NA	NA	NA	NA	NA	NA	NA	1.58636	1.84992e-09	NA	NA	NA	NA	0.808199	9.29405e-05	NA	NA	-0.260383	1	NA	NA	NA	NA
MZT2A	NA	NA	NA	NA	NA	NA	NA	NA	NA	NA	NA	NA	NA	NA	-0.316096	1	NA	NA	NA	NA	NA	NA	NA	NA	NA	NA	1.02069	1	-0.417162	0.00102602
N4BP1	NA	NA	0.275781	1	NA	NA	0.264341	1	NA	NA	NA	NA	NA	NA	-0.312464	1	NA	NA	NA	NA	NA	NA	NA	NA	0.297232	1	1.572	1	NA	NA
N4BP2	NA	NA	NA	NA	NA	NA	NA	NA	NA	NA	NA	NA	NA	NA	NA	NA	NA	NA	NA	NA	NA	NA	NA	NA	-0.283109	0.0919648	0.707024	1	0.380197	1
N4BP2L1	NA	NA	NA	NA	NA	NA	-0.525128	1	NA	NA	NA	NA	NA	NA	NA	NA	NA	NA	NA	NA	NA	NA	NA	NA	NA	NA	0.261752	1	NA	NA
N4BP2L2	0.252031	1.93823e-59	NA	NA	0.325471	1	NA	NA	NA	NA	NA	NA	NA	NA	-0.735132	0.0276958	-0.261011	3.58573e-14	NA	NA	NA	NA	NA	NA	NA	NA	3.22918	1	0.426545	0.0101169
NAA38	0.326072	9.46029e-57	NA	NA	0.612282	1	NA	NA	NA	NA	NA	NA	NA	NA	NA	NA	NA	NA	NA	NA	NA	NA	NA	NA	-0.535193	0.0020179	-2.4201	1	NA	NA
NAAA	NA	NA	-0.559578	0.00256029	NA	NA	NA	NA	NA	NA	NA	NA	NA	NA	NA	NA	NA	NA	NA	NA	NA	NA	NA	NA	NA	NA	NA	NA	NA	NA
NAB1	-0.252268	1.3418e-32	NA	NA	NA	NA	NA	NA	NA	NA	NA	NA	NA	NA	NA	NA	NA	NA	NA	NA	NA	NA	NA	NA	NA	NA	NA	NA	NA	NA
NAB2	-0.300408	3.06946e-19	NA	NA	NA	NA	NA	NA	NA	NA	NA	NA	NA	NA	NA	NA	NA	NA	NA	NA	NA	NA	NA	NA	NA	NA	NA	NA	NA	NA
NABP1	0.630563	2.98412e-54	0.570309	1	NA	NA	NA	NA	NA	NA	NA	NA	NA	NA	-0.275166	1	NA	NA	NA	NA	NA	NA	NA	NA	NA	NA	NA	NA	0.365941	1
NACA	-0.632842	7.04282e-103	-0.852791	2.71427e-22	-0.727794	1.53831e-08	NA	NA	NA	NA	NA	NA	NA	NA	NA	NA	NA	NA	NA	NA	-0.389643	6.00833e-07	NA	NA	NA	NA	1.81791	1	-1.09188	2.26602e-11
NADK	NA	NA	NA	NA	0.367236	1	-0.36676	1	NA	NA	NA	NA	NA	NA	NA	NA	NA	NA	NA	NA	NA	NA	NA	NA	NA	NA	NA	NA	NA	NA
NAF1	-1.05568	4.75258e-73	-0.56905	0.524368	-0.904715	1	-0.407217	1	NA	NA	NA	NA	NA	NA	NA	NA	NA	NA	NA	NA	NA	NA	NA	NA	NA	NA	NA	NA	NA	NA
NAGK	NA	NA	NA	NA	-0.420443	1	NA	NA	NA	NA	NA	NA	NA	NA	NA	NA	NA	NA	NA	NA	NA	NA	NA	NA	NA	NA	NA	NA	NA	NA
NAMPT	NA	NA	0.284726	0.0010015	0.763135	1	-0.385517	1	NA	NA	NA	NA	NA	NA	-0.391865	1	NA	NA	NA	NA	NA	NA	0.682653	0.0936373	NA	NA	NA	NA	-0.280127	1
NAP1L1	NA	NA	-1.27018	2.72901e-23	-0.614857	1	NA	NA	NA	NA	NA	NA	NA	NA	NA	NA	NA	NA	NA	NA	NA	NA	NA	NA	-0.316087	1	-1.20356	1	NA	NA
NAP1L4	NA	NA	NA	NA	NA	NA	NA	NA	NA	NA	NA	NA	NA	NA	NA	NA	NA	NA	NA	NA	0.306868	1	0.291141	1	NA	NA	NA	NA	0.850082	0.000662296
NAPA	-0.294261	1.4147e-72	NA	NA	NA	NA	NA	NA	NA	NA	NA	NA	NA	NA	NA	NA	NA	NA	NA	NA	NA	NA	NA	NA	NA	NA	NA	NA	NA	NA
NAPRT	NA	NA	NA	NA	-0.264755	1	-0.275073	1	NA	NA	NA	NA	NA	NA	NA	NA	NA	NA	NA	NA	NA	NA	NA	NA	NA	NA	NA	NA	NA	NA
NARF	NA	NA	NA	NA	NA	NA	NA	NA	NA	NA	NA	NA	NA	NA	NA	NA	NA	NA	NA	NA	NA	NA	NA	NA	-0.51332	0.0150626	0.307693	1	-0.337318	1
NASP	NA	NA	NA	NA	0.307757	1	-0.286141	1	NA	NA	NA	NA	-0.365208	9.46089e-17	-0.258302	1	NA	NA	NA	NA	NA	NA	0.264621	1	NA	NA	0.265065	1	NA	NA
NBDY	NA	NA	NA	NA	-0.261778	1	NA	NA	NA	NA	NA	NA	NA	NA	NA	NA	NA	NA	NA	NA	NA	NA	NA	NA	NA	NA	NA	NA	NA	NA
NBL1	NA	NA	NA	NA	NA	NA	NA	NA	NA	NA	NA	NA	NA	NA	NA	NA	NA	NA	NA	NA	NA	NA	NA	NA	-0.326372	1	NA	NA	NA	NA
NBPF14	-0.296272	1.64332e-30	NA	NA	NA	NA	NA	NA	NA	NA	NA	NA	NA	NA	NA	NA	NA	NA	NA	NA	NA	NA	NA	NA	NA	NA	NA	NA	NA	NA
NBPF19	-0.657777	2.86006e-72	-0.455724	2.72999e-05	NA	NA	NA	NA	NA	NA	NA	NA	NA	NA	NA	NA	NA	NA	NA	NA	NA	NA	NA	NA	NA	NA	NA	NA	NA	NA
NCBP2-AS2	NA	NA	NA	NA	NA	NA	-0.304615	1	NA	NA	NA	NA	NA	NA	0.371025	0.00317283	NA	NA	NA	NA	NA	NA	NA	NA	NA	NA	NA	NA	NA	NA
NCBP2AS2	NA	NA	0.352597	1.15388e-07	NA	NA	0.399687	1	NA	NA	NA	NA	NA	NA	-0.399333	1	NA	NA	NA	NA	NA	NA	NA	NA	0.357324	1	NA	NA	NA	NA
NCF4	0.267197	6.04994e-77	NA	NA	0.281968	1	NA	NA	NA	NA	NA	NA	NA	NA	NA	NA	NA	NA	NA	NA	NA	NA	NA	NA	-0.378243	0.435947	NA	NA	NA	NA
NCK2	NA	NA	NA	NA	NA	NA	0.911714	1	NA	NA	NA	NA	NA	NA	NA	NA	NA	NA	NA	NA	NA	NA	NA	NA	0.486327	0.555998	-1.16244	1	0.602178	0.668456
NCL	NA	NA	NA	NA	NA	NA	NA	NA	NA	NA	NA	NA	NA	NA	NA	NA	NA	NA	NA	NA	NA	NA	NA	NA	-0.251661	1	-0.409847	1	0.5598	0.00768826
NCOA1	NA	NA	NA	NA	0.349476	1	NA	NA	NA	NA	NA	NA	NA	NA	-0.287797	1	NA	NA	NA	NA	NA	NA	-0.303222	1	NA	NA	NA	NA	NA	NA
NCOA3	NA	NA	NA	NA	NA	NA	NA	NA	NA	NA	NA	NA	NA	NA	-0.272844	1	NA	NA	NA	NA	NA	NA	NA	NA	NA	NA	1.72408	1	NA	NA
NCOA4	NA	NA	NA	NA	0.642165	0.58884	NA	NA	NA	NA	NA	NA	NA	NA	NA	NA	NA	NA	NA	NA	NA	NA	NA	NA	-0.515836	0.079184	-2.59377	1	NA	NA
NCOA7	0.25293	8.62608e-45	NA	NA	NA	NA	NA	NA	NA	NA	NA	NA	NA	NA	NA	NA	NA	NA	NA	NA	NA	NA	0.260757	1	-0.599206	0.000571259	0.482039	1	0.555607	1
NCOR1	0.316379	1.77054e-63	NA	NA	0.656405	0.114154	NA	NA	NA	NA	NA	NA	NA	NA	NA	NA	NA	NA	NA	NA	NA	NA	NA	NA	NA	NA	-0.945408	1	0.373779	1
NCR3LG1	-0.278049	5.26615e-15	NA	NA	NA	NA	NA	NA	NA	NA	NA	NA	NA	NA	NA	NA	NA	NA	NA	NA	NA	NA	NA	NA	NA	NA	NA	NA	NA	NA
NDRG1	-0.279628	8.12026e-51	NA	NA	NA	NA	-0.432936	1	NA	NA	NA	NA	NA	NA	0.337942	1	NA	NA	NA	NA	NA	NA	NA	NA	NA	NA	NA	NA	0.571378	1
NDRG2	NA	NA	NA	NA	-0.328234	1	NA	NA	NA	NA	NA	NA	NA	NA	NA	NA	NA	NA	NA	NA	NA	NA	NA	NA	NA	NA	NA	NA	NA	NA
NDUFA1	0.413924	2.18705e-42	0.599959	6.5957e-11	0.728972	0.000340232	0.34758	1	NA	NA	NA	NA	NA	NA	0.443895	1	NA	NA	NA	NA	0.262394	1	NA	NA	NA	NA	-1.50277	1	NA	NA
NDUFA13	0.386868	2.57729e-80	0.261717	1	NA	NA	0.255965	1	0.486511	3.87264e-294	0.461517	3.85952e-123	0.479055	2.09149e-37	0.822429	1.84921e-09	0.528269	2.06955e-49	0.325515	4.44415e-09	0.739344	1.259e-15	0.619222	5.08272e-07	0.383237	0.470199	-1.25726	1	NA	NA
NDUFA2	NA	NA	NA	NA	NA	NA	NA	NA	NA	NA	NA	NA	NA	NA	NA	NA	NA	NA	NA	NA	NA	NA	NA	NA	NA	NA	NA	NA	-0.296377	0.0431096
NDUFA4	NA	NA	NA	NA	NA	NA	NA	NA	NA	NA	NA	NA	NA	NA	NA	NA	NA	NA	NA	NA	0.277124	1	NA	NA	NA	NA	-1.1678	1	-0.42744	0.00157059
NDUFA5	NA	NA	NA	NA	0.332658	1	NA	NA	NA	NA	NA	NA	NA	NA	NA	NA	NA	NA	NA	NA	NA	NA	NA	NA	NA	NA	-0.341671	1	NA	NA
NDUFA6	NA	NA	NA	NA	0.306672	1	NA	NA	NA	NA	NA	NA	NA	NA	0.25185	1	NA	NA	NA	NA	0.271847	1	NA	NA	NA	NA	-0.70403	1	NA	NA
NDUFAB1	NA	NA	NA	NA	0.449749	1	-0.339134	1	NA	NA	NA	NA	NA	NA	0.392445	1	NA	NA	NA	NA	NA	NA	NA	NA	NA	NA	0.625776	1	NA	NA
NDUFAF3	NA	NA	NA	NA	NA	NA	NA	NA	NA	NA	NA	NA	NA	NA	0.32368	1	NA	NA	NA	NA	NA	NA	NA	NA	NA	NA	-2.29993	1	NA	NA
NDUFB10	NA	NA	NA	NA	NA	NA	NA	NA	NA	NA	NA	NA	NA	NA	NA	NA	NA	NA	NA	NA	NA	NA	NA	NA	-0.319234	0.000629941	-1.42589	1	NA	NA
NDUFB11	NA	NA	NA	NA	NA	NA	NA	NA	NA	NA	NA	NA	NA	NA	0.413783	1	NA	NA	NA	NA	NA	NA	NA	NA	NA	NA	-1.67683	1	-0.503726	0.000880589
NDUFB4	NA	NA	NA	NA	NA	NA	0.353413	1	NA	NA	NA	NA	NA	NA	NA	NA	NA	NA	NA	NA	NA	NA	NA	NA	NA	NA	-0.988813	1	NA	NA
NDUFB5	NA	NA	-0.385959	0.0339883	NA	NA	NA	NA	NA	NA	NA	NA	NA	NA	NA	NA	NA	NA	NA	NA	NA	NA	NA	NA	-0.445442	0.0139481	NA	NA	NA	NA
NDUFB7	NA	NA	NA	NA	0.525197	0.326713	NA	NA	NA	NA	NA	NA	NA	NA	0.254553	1	NA	NA	NA	NA	NA	NA	NA	NA	-0.279465	0.0178504	NA	NA	-0.388291	1
NDUFB9	0.342308	2.17506e-37	0.349714	1	0.726518	0.0660741	NA	NA	NA	NA	NA	NA	NA	NA	NA	NA	NA	NA	NA	NA	NA	NA	NA	NA	NA	NA	-1.28262	1	NA	NA
NDUFC1	0.529191	1.10128e-92	0.365148	0.0046487	0.728439	0.00150441	NA	NA	NA	NA	NA	NA	NA	NA	NA	NA	NA	NA	NA	NA	0.270778	1	NA	NA	-0.268092	0.0274691	-0.761362	1	NA	NA
NDUFS4	NA	NA	NA	NA	NA	NA	NA	NA	NA	NA	NA	NA	NA	NA	NA	NA	NA	NA	NA	NA	NA	NA	NA	NA	-0.281686	0.161773	0.822657	1	NA	NA
NDUFS5	NA	NA	NA	NA	0.549901	1	-0.408209	1	NA	NA	NA	NA	NA	NA	NA	NA	NA	NA	NA	NA	0.314207	1	NA	NA	NA	NA	-1.22125	1	-0.569301	0.504122
NDUFV1	NA	NA	NA	NA	-0.316101	1	NA	NA	NA	NA	NA	NA	NA	NA	0.384447	1	NA	NA	NA	NA	NA	NA	NA	NA	NA	NA	NA	NA	-0.251192	1
NEAT1	-5.3504	0	-5.86298	1.16773e-40	-4.62404	2.731e-06	-2.14733	6.62302e-05	NA	NA	0.371947	1	NA	NA	1.40514	1.36415e-17	1.11477	1.10096e-35	0.48497	1	0.252115	1	-0.397139	1	-1.6679	1.66059e-05	NA	NA	-2.0014	1.49954e-06
NEDD8	NA	NA	0.351796	0.181747	0.323927	1	NA	NA	NA	NA	NA	NA	NA	NA	NA	NA	NA	NA	NA	NA	NA	NA	NA	NA	-0.386874	0.0338641	-1.4388	1	NA	NA
NELFCD	NA	NA	NA	NA	NA	NA	NA	NA	NA	NA	NA	NA	NA	NA	NA	NA	NA	NA	NA	NA	NA	NA	NA	NA	NA	NA	-0.876947	1	0.256368	1
NENF	NA	NA	NA	NA	NA	NA	-0.452408	1	NA	NA	NA	NA	NA	NA	0.259931	1	NA	NA	NA	NA	NA	NA	0.254871	1	-0.660496	5.67876e-07	-1.85415	1	NA	NA
NEU1	NA	NA	-0.600086	0.00349912	0.340203	1	0.510713	1	0.383188	5.5758e-163	0.326387	2.12619e-75	NA	NA	NA	NA	NA	NA	NA	NA	NA	NA	NA	NA	NA	NA	NA	NA	0.337018	1
NEXN	NA	NA	NA	NA	NA	NA	NA	NA	NA	NA	NA	NA	NA	NA	NA	NA	NA	NA	NA	NA	NA	NA	NA	NA	NA	NA	-1.6834	1	NA	NA
NFAT5	NA	NA	NA	NA	-0.316986	1	NA	NA	NA	NA	NA	NA	NA	NA	NA	NA	NA	NA	NA	NA	NA	NA	NA	NA	NA	NA	-0.589958	1	NA	NA
NFATC1	-0.294565	1.0616e-29	-0.443565	0.135258	-0.419828	1	NA	NA	NA	NA	NA	NA	NA	NA	NA	NA	NA	NA	NA	NA	NA	NA	NA	NA	-0.353527	1	0.936685	1	NA	NA
NFATC2	NA	NA	NA	NA	NA	NA	NA	NA	NA	NA	NA	NA	NA	NA	NA	NA	NA	NA	NA	NA	NA	NA	NA	NA	-0.393592	0.0634347	NA	NA	NA	NA
NFATC2IP	NA	NA	NA	NA	NA	NA	-0.436373	1	NA	NA	NA	NA	NA	NA	-0.348964	1	NA	NA	NA	NA	NA	NA	NA	NA	NA	NA	NA	NA	NA	NA
NFE2	NA	NA	NA	NA	NA	NA	NA	NA	NA	NA	NA	NA	NA	NA	NA	NA	NA	NA	NA	NA	NA	NA	NA	NA	-0.362818	0.000220586	-2.42361	1	NA	NA
NFE2L2	NA	NA	NA	NA	NA	NA	0.258027	1	NA	NA	NA	NA	-0.299745	1.56818e-15	-0.40854	1	-0.323378	9.07142e-19	NA	NA	NA	NA	NA	NA	NA	NA	2.71408	1	NA	NA
NFIA	NA	NA	NA	NA	NA	NA	NA	NA	NA	NA	NA	NA	NA	NA	NA	NA	NA	NA	NA	NA	NA	NA	NA	NA	-0.433301	0.142929	1.05588	1	NA	NA
NFIC	NA	NA	NA	NA	0.35173	1	NA	NA	NA	NA	NA	NA	NA	NA	NA	NA	NA	NA	NA	NA	NA	NA	NA	NA	-0.284903	0.606224	NA	NA	NA	NA
NFKB1	-0.943085	1.64641e-100	-0.825322	3.88129e-10	-0.30759	1	NA	NA	NA	NA	NA	NA	0.42147	3.82198e-12	-0.262646	1	0.290774	0.560344	NA	NA	NA	NA	0.264365	1	NA	NA	NA	NA	NA	NA
NFKB2	NA	NA	-0.375798	0.499553	NA	NA	NA	NA	NA	NA	NA	NA	NA	NA	NA	NA	NA	NA	NA	NA	NA	NA	NA	NA	NA	NA	NA	NA	NA	NA
NFKBIA	-1.32306	7.94458e-135	-0.856869	1.66887e-08	-0.28385	1	-0.402226	1	NA	NA	NA	NA	NA	NA	NA	NA	NA	NA	0.31252	0.0312162	NA	NA	NA	NA	-0.307906	1	0.645478	1	-0.272575	1
NFKBID	-0.335822	2.80754e-28	NA	NA	-0.682639	1	-0.531704	1	NA	NA	NA	NA	NA	NA	NA	NA	NA	NA	NA	NA	NA	NA	NA	NA	-0.265939	1	NA	NA	-0.778661	1
NFKBIE	-0.262573	1.28083e-32	-0.268612	0.750726	NA	NA	-0.544345	1	NA	NA	NA	NA	NA	NA	NA	NA	NA	NA	NA	NA	NA	NA	NA	NA	NA	NA	NA	NA	NA	NA
NFKBIZ	-0.361943	1.82028e-16	-0.559788	0.102429	NA	NA	-0.362669	1	NA	NA	NA	NA	0.371317	7.02212e-09	-0.403797	1	NA	NA	NA	NA	0.263335	1	0.636944	0.95697	-0.556363	1	1.84913	1	0.5714	0.0234864
NGDN	NA	NA	NA	NA	NA	NA	NA	NA	NA	NA	NA	NA	NA	NA	-0.341011	1	NA	NA	NA	NA	NA	NA	NA	NA	NA	NA	1.572	1	NA	NA
NIBAN1	1.21988	2.83227e-238	1.23383	2.87392e-36	1.33645	4.46363e-07	0.490397	1	NA	NA	-0.265977	1.077e-17	NA	NA	-0.308946	0.0256277	NA	NA	NA	NA	NA	NA	NA	NA	NA	NA	NA	NA	NA	NA
NIFK	NA	NA	NA	NA	NA	NA	-0.285231	1	NA	NA	NA	NA	NA	NA	-0.282715	1	NA	NA	NA	NA	NA	NA	NA	NA	NA	NA	NA	NA	-0.312518	1
NIN	NA	NA	NA	NA	0.497218	1	0.574646	1	NA	NA	NA	NA	NA	NA	-0.340367	1	NA	NA	NA	NA	NA	NA	NA	NA	NA	NA	0.800947	1	NA	NA
NINJ1	-1.03791	1.26505e-110	-0.423638	0.602947	NA	NA	-0.450781	1	NA	NA	NA	NA	0.332616	3.00433e-08	NA	NA	NA	NA	NA	NA	NA	NA	0.30705	1	NA	NA	NA	NA	-0.276755	1
NIPBL	NA	NA	NA	NA	NA	NA	NA	NA	NA	NA	NA	NA	NA	NA	-0.296528	1	NA	NA	NA	NA	NA	NA	NA	NA	NA	NA	NA	NA	0.608345	1
NIPSNAP2	NA	NA	NA	NA	NA	NA	NA	NA	NA	NA	NA	NA	NA	NA	NA	NA	NA	NA	NA	NA	NA	NA	NA	NA	-0.29513	1	NA	NA	NA	NA
NIPSNAP3A	NA	NA	NA	NA	NA	NA	NA	NA	NA	NA	NA	NA	NA	NA	NA	NA	NA	NA	NA	NA	NA	NA	NA	NA	-0.396388	0.0549175	NA	NA	NA	NA
NIT2	NA	NA	NA	NA	NA	NA	NA	NA	NA	NA	NA	NA	NA	NA	NA	NA	NA	NA	NA	NA	NA	NA	NA	NA	-0.262476	1	NA	NA	NA	NA
NKG7	0.281459	1.50312e-130	0.780775	4.42793e-06	1.0266	1.25086e-05	NA	NA	NA	NA	-0.636317	2.73274e-59	-0.2769	1.09382e-05	-0.320375	1	NA	NA	-0.476533	1	-0.941415	1	NA	NA	NA	NA	-3.57716	1	-2.35285	6.66086e-13
NKTR	NA	NA	NA	NA	NA	NA	NA	NA	NA	NA	NA	NA	NA	NA	NA	NA	NA	NA	NA	NA	NA	NA	0.260723	1	-0.259476	1	0.668055	1	0.758293	1.83211e-07
NLRP1	NA	NA	-0.286095	1	NA	NA	NA	NA	NA	NA	NA	NA	NA	NA	NA	NA	NA	NA	NA	NA	NA	NA	NA	NA	NA	NA	NA	NA	0.506933	1
NLRP3	-1.35566	1.10989e-114	-1.02068	4.22689e-07	NA	NA	-0.482992	1	NA	NA	NA	NA	NA	NA	NA	NA	NA	NA	NA	NA	NA	NA	NA	NA	NA	NA	NA	NA	NA	NA
[truncated: 1,508 more rows]

## Sheet: Table S3B - Day0v28
Gene	CD14 Monos_avg_log2FC	CD14 Monos_p_val_adj	CD16 Monos_avg_log2FC	CD16 Monos_p_val_adj	cDCs_avg_log2FC	cDCs_p_val_adj	pDCs_avg_log2FC	pDCs_p_val_adj	CD4 T_avg_log2FC	CD4 T_p_val_adj	CD8 T_avg_log2FC	CD8 T_p_val_adj	GDT_avg_log2FC	GDT_p_val_adj	NKT_avg_log2FC	NKT_p_val_adj	NK_avg_log2FC	NK_p_val_adj	B cells_avg_log2FC	B cells_p_val_adj	Plasma_avg_log2FC	Plasma_p_val_adj	Proliferating_avg_log2FC	Proliferating_p_val_adj	HSPCs_avg_log2FC	HSPCs_p_val_adj	Platelets_avg_log2FC	Platelets_p_val_adj	Unknown_avg_log2FC	Unknown_p_val_adj
MALAT1	-5.79033	2.52583e-165	-7.19961	1.36417e-30	-6.72417	0.092748	-7.49537	7.79942e-09	-1.29766	1.0977e-195	-0.959598	7.69507e-54	-0.917916	4.2154e-08	-0.674695	2.12797e-13	-0.816136	1.03568e-38	-1.08864	1.35381e-22	-0.988262	1	-1.08058	0.001568	-2.3123	1	-0.725692	1	-2.7929	1.62786e-14
NEAT1	-4.56099	3.21922e-161	-5.30197	2.55532e-30	-4.20147	0.092748	-1.97796	3.8491e-06	-0.483863	5.2445e-135	NA	NA	NA	NA	0.737404	0.0415374	0.925148	6.22149e-70	NA	NA	-0.46578	1	-0.451133	0.00193341	-0.96983	1	NA	NA	-1.32799	1.598e-13
CCL3L1	-4.54741	1.52158e-163	-4.3298	2.76097e-15	NA	NA	NA	NA	NA	NA	NA	NA	NA	NA	NA	NA	NA	NA	NA	NA	NA	NA	NA	NA	NA	NA	NA	NA	NA	NA
H3F3A	-4.0504	3.56475e-166	-4.24163	2.96606e-27	-3.64185	0.092748	-3.46848	1.61051e-08	-1.1844	3.00826e-303	-0.900975	6.335e-86	-0.645009	1.01563e-07	NA	NA	-0.514153	9.23402e-17	-1.17622	1.0539e-35	-0.702804	1	-1.84679	1.41052e-06	-2.0291	1	-4.81383	1	-1.17714	0.00271582
H3F3B	-3.89227	1.42432e-165	-4.20121	2.55532e-30	-3.36971	0.092748	-3.97988	7.79942e-09	-1.02266	1.93567e-195	-0.865921	4.21589e-64	-0.988646	5.05559e-17	NA	NA	-0.608366	1.48752e-23	-1.2373	1.18912e-34	-0.415106	1	-1.25317	0.00444265	-1.8531	1	-2.61951	1	-1.72571	8.51695e-09
ATP2B1-AS1	-3.26854	1.26854e-160	-2.59158	4.4201e-26	-0.629851	1	NA	NA	NA	NA	NA	NA	NA	NA	NA	NA	NA	NA	NA	NA	NA	NA	NA	NA	NA	NA	NA	NA	NA	NA
CCL4L2	-3.16972	4.65683e-165	-2.44154	1.43256e-12	-1.15811	1	-0.628105	1	NA	NA	NA	NA	0.279063	0.040336	NA	NA	0.814543	5.37079e-13	NA	NA	NA	NA	0.679189	1	NA	NA	NA	NA	NA	NA
IL1B	-2.94921	0	-2.37477	7.51582e-19	-1.66239	1	NA	NA	NA	NA	NA	NA	NA	NA	NA	NA	NA	NA	NA	NA	NA	NA	NA	NA	-0.277691	1	NA	NA	NA	NA
CCL20	-2.94029	1.14057e-110	-1.79347	1	NA	NA	NA	NA	NA	NA	NA	NA	NA	NA	NA	NA	NA	NA	NA	NA	NA	NA	NA	NA	NA	NA	NA	NA	NA	NA
CCL3L3	-2.7158	9.31344e-122	-0.895377	0.00592529	-0.382042	1	NA	NA	NA	NA	NA	NA	NA	NA	NA	NA	NA	NA	NA	NA	NA	NA	NA	NA	NA	NA	NA	NA	NA	NA
AC020656.1	-2.67466	4.12348e-141	-0.352065	0.0904422	-1.46346	0.28014	NA	NA	NA	NA	NA	NA	NA	NA	NA	NA	NA	NA	NA	NA	NA	NA	NA	NA	NA	NA	NA	NA	NA	NA
CCL3	-2.43421	1.4164e-187	-1.40646	0.0098808	0.581812	1	NA	NA	NA	NA	NA	NA	0.658347	0.0197175	0.324749	1	0.717465	1.88638e-17	NA	NA	-0.382061	1	1.15463	1	NA	NA	NA	NA	NA	NA
CCL4	-2.3273	2.98103e-158	-1.33195	6.39953e-07	NA	NA	-1.35723	1	NA	NA	NA	NA	0.622478	6.63387e-07	NA	NA	0.558573	7.37782e-09	NA	NA	NA	NA	1.32285	0.323267	NA	NA	-1.54461	1	-0.431888	0.0415314
C15orf48	-2.3109	9.29849e-110	-1.04486	0.205504	-2.23122	0.000205738	NA	NA	NA	NA	NA	NA	NA	NA	NA	NA	NA	NA	NA	NA	NA	NA	NA	NA	NA	NA	NA	NA	NA	NA
IER3	-2.14944	1.18556e-199	-1.07381	6.02846e-08	-0.976602	1	-0.681223	1	NA	NA	NA	NA	NA	NA	NA	NA	NA	NA	NA	NA	NA	NA	NA	NA	-0.493819	1	NA	NA	NA	NA
TNF	-2.1384	1.0616e-90	-2.16512	6.07787e-16	-0.718648	1	-0.263686	1	NA	NA	NA	NA	NA	NA	NA	NA	NA	NA	NA	NA	NA	NA	NA	NA	NA	NA	NA	NA	-0.260202	1
AREG	-2.00632	1.43032e-61	-0.372199	1	-1.60724	1	NA	NA	NA	NA	NA	NA	NA	NA	0.269572	1	0.664128	4.81743e-12	0.320649	1	NA	NA	NA	NA	1.09232	1	0.968519	1	NA	NA
RRAD	-1.96989	3.61632e-65	NA	NA	-1.00127	1	NA	NA	NA	NA	NA	NA	NA	NA	NA	NA	NA	NA	NA	NA	NA	NA	NA	NA	NA	NA	NA	NA	NA	NA
OLR1	-1.9666	1.19217e-141	-1.04779	0.0201546	-0.52922	1	NA	NA	NA	NA	NA	NA	NA	NA	NA	NA	NA	NA	NA	NA	NA	NA	NA	NA	NA	NA	NA	NA	NA	NA
IL1A	-1.95053	4.70952e-104	-1.61952	3.85238e-07	NA	NA	NA	NA	NA	NA	NA	NA	NA	NA	NA	NA	NA	NA	NA	NA	NA	NA	NA	NA	NA	NA	NA	NA	NA	NA
DUSP2	-1.91279	1.46299e-127	-1.40431	1.12811e-13	-1.75363	1.10081e-05	NA	NA	-0.312212	9.95923e-69	-0.425121	7.83999e-58	NA	NA	-0.500265	0.508889	-0.310771	4.53823e-22	NA	NA	NA	NA	NA	NA	NA	NA	1.55627	1	-0.719063	0.139201
CXCL2	-1.87856	3.12693e-111	-0.836374	0.0560132	-0.846234	1	NA	NA	NA	NA	NA	NA	NA	NA	NA	NA	NA	NA	NA	NA	NA	NA	NA	NA	-0.548302	1	NA	NA	NA	NA
EREG	-1.83741	2.12328e-94	-0.879425	1	-0.423064	1	NA	NA	NA	NA	NA	NA	NA	NA	NA	NA	NA	NA	NA	NA	NA	NA	NA	NA	-0.666401	1	NA	NA	NA	NA
CCL2	-1.80926	2.58346e-28	NA	NA	NA	NA	NA	NA	NA	NA	NA	NA	NA	NA	NA	NA	NA	NA	NA	NA	NA	NA	NA	NA	NA	NA	NA	NA	NA	NA
PTGS2	-1.78	2.2063e-94	-1.30589	0.701739	-0.539924	1	NA	NA	NA	NA	NA	NA	NA	NA	NA	NA	NA	NA	NA	NA	NA	NA	NA	NA	-0.59638	1	NA	NA	NA	NA
IL1RN	-1.71604	2.14301e-101	-0.418272	7.03597e-11	-0.758988	0.303863	NA	NA	NA	NA	NA	NA	NA	NA	NA	NA	NA	NA	NA	NA	NA	NA	NA	NA	NA	NA	NA	NA	NA	NA
ZFAS1	-1.71084	5.26269e-123	-1.60531	1.78985e-19	-1.10738	0.162026	-1.08652	4.91414e-05	-0.40706	7.11671e-130	-0.309739	1.52387e-17	-0.366308	0.000320569	0.527188	0.706397	NA	NA	-0.42241	4.15006e-07	NA	NA	-0.706106	0.0187188	-1.40063	1	NA	NA	NA	NA
CXCL8	-1.62178	1.98068e-125	-0.324231	1	-1.31052	1	-1.42655	1	NA	NA	NA	NA	NA	NA	NA	NA	NA	NA	NA	NA	NA	NA	NA	NA	-0.710701	1	NA	NA	NA	NA
FTH1	-1.6057	2.83555e-212	-0.416938	0.00120921	-1.02156	4.93101e-14	-0.384273	1	NA	NA	0.337032	1.60351e-19	0.425516	7.09356e-19	0.472521	0.0149512	NA	NA	NA	NA	NA	NA	NA	NA	0.567687	1	-1.66571	1	NA	NA
PHLDA1	-1.60335	5.61629e-80	NA	NA	NA	NA	-0.266571	1	NA	NA	NA	NA	NA	NA	NA	NA	NA	NA	NA	NA	NA	NA	0.381372	1	NA	NA	NA	NA	NA	NA
GADD45B	-1.54649	3.44888e-123	-0.95826	2.04297e-07	-1.5397	8.89163e-06	-0.4537	1	NA	NA	NA	NA	-0.372654	1.15942e-14	NA	NA	NA	NA	NA	NA	NA	NA	NA	NA	NA	NA	NA	NA	-0.278023	1
CXCL3	-1.50232	3.04011e-47	-0.740986	1	NA	NA	NA	NA	NA	NA	NA	NA	NA	NA	NA	NA	NA	NA	NA	NA	NA	NA	NA	NA	-0.37862	1	NA	NA	NA	NA
HLA-DPA1	-1.46947	3.56219e-108	-1.13705	1.20363e-17	-2.56215	2.40333e-20	-0.571289	1	NA	NA	-0.470895	2.4709e-45	NA	NA	NA	NA	NA	NA	-0.291793	0.000118492	-0.2592	1	NA	NA	-1.03533	0.178338	NA	NA	NA	NA
CYTOR	-1.4636	8.77328e-90	-0.64666	0.000266773	-0.557399	1	NA	NA	NA	NA	NA	NA	NA	NA	0.345261	0.829977	NA	NA	NA	NA	NA	NA	-0.376373	1	NA	NA	NA	NA	NA	NA
NFKB1	-1.45683	5.39024e-171	-1.11885	2.10885e-09	-0.591582	1	-0.423519	1	NA	NA	NA	NA	0.478923	4.32799e-20	NA	NA	0.459917	1.1444e-12	NA	NA	NA	NA	NA	NA	NA	NA	NA	NA	NA	NA
AC007952.4	-1.45394	3.36614e-101	-1.27112	7.16876e-12	-1.10224	0.28014	-1.27741	2.6279e-05	NA	NA	NA	NA	NA	NA	NA	NA	NA	NA	NA	NA	NA	NA	NA	NA	-0.323712	1	NA	NA	NA	NA
HLA-DQA1	-1.43414	1.81564e-49	-0.691182	0.572247	-2.65165	3.41136e-19	-0.275569	1	NA	NA	NA	NA	NA	NA	NA	NA	NA	NA	NA	NA	NA	NA	NA	NA	-0.962841	1	NA	NA	NA	NA
KDM6B	-1.40936	2.18267e-177	-1.18436	6.79959e-16	-1.09869	1.7766e-05	-0.57525	1	NA	NA	-0.258434	7.29952e-31	NA	NA	-0.389749	1	NA	NA	-0.382836	6.21034e-11	NA	NA	NA	NA	NA	NA	NA	NA	NA	NA
DDX3Y	-1.39133	1.69999e-122	-1.06523	5.49606e-16	-1.57687	2.79342e-13	-0.717795	1	NA	NA	NA	NA	NA	NA	NA	NA	NA	NA	NA	NA	NA	NA	NA	NA	NA	NA	0.622453	1	NA	NA
LGALS2	-1.39054	1.6754e-94	NA	NA	-1.58228	1.22394e-05	NA	NA	NA	NA	NA	NA	NA	NA	NA	NA	NA	NA	NA	NA	NA	NA	NA	NA	NA	NA	NA	NA	NA	NA
RPS4Y1	-1.38654	3.34907e-168	-1.56083	3.06908e-28	-2.52569	8.16473e-16	0.312684	2.11225e-05	NA	NA	NA	NA	NA	NA	NA	NA	NA	NA	-0.250393	3.2135e-08	-0.409289	0.000494221	-0.419232	1	0.388086	1	0.602255	1	NA	NA
CD83	-1.35894	2.87467e-141	-1.28685	1.23033e-18	-1.61299	2.34455e-06	-0.543507	1	NA	NA	NA	NA	0.350442	1	-0.502812	1	0.321711	1	NA	NA	NA	NA	0.363306	1	NA	NA	NA	NA	NA	NA
HLA-DRA	-1.35173	7.70734e-123	NA	NA	-2.23299	9.75361e-19	-0.507663	1	NA	NA	-0.2597	1.14339e-07	NA	NA	NA	NA	0.292641	4.47567e-06	NA	NA	-0.358917	1	NA	NA	-1.7437	0.000128791	NA	NA	NA	NA
NR4A3	-1.35031	5.78559e-99	-1.51815	6.68359e-15	-1.72701	8.63543e-09	-0.699453	1	NA	NA	NA	NA	NA	NA	NA	NA	NA	NA	-0.440683	1.11697e-05	NA	NA	NA	NA	-0.662812	1	NA	NA	-0.506757	1
CCL7	-1.34747	1.30694e-15	NA	NA	NA	NA	NA	NA	NA	NA	NA	NA	NA	NA	NA	NA	NA	NA	NA	NA	NA	NA	NA	NA	NA	NA	NA	NA	NA	NA
PLAUR	-1.34383	8.41173e-91	-1.1433	4.27915e-17	-0.71956	1	NA	NA	NA	NA	NA	NA	NA	NA	NA	NA	NA	NA	NA	NA	NA	NA	NA	NA	-0.343777	1	NA	NA	NA	NA
G0S2	-1.30159	3.98584e-50	-0.877536	0.0362954	-0.997006	1	NA	NA	NA	NA	NA	NA	NA	NA	NA	NA	NA	NA	NA	NA	NA	NA	NA	NA	NA	NA	NA	NA	NA	NA
HSPA5	-1.29509	2.63181e-68	-0.51722	1	NA	NA	-0.457233	1	NA	NA	0.288261	5.12942e-26	0.633518	1.25931e-18	0.480086	1	0.394637	1.40419e-10	NA	NA	0.508251	0.0314486	0.642878	1	-0.665974	1	0.434946	1	NA	NA
HLA-DPB1	-1.278	3.45946e-86	-0.742398	3.4689e-05	-2.77474	6.53918e-21	-0.531946	1	NA	NA	-0.474132	1.39235e-52	-0.283625	7.24298e-06	NA	NA	NA	NA	NA	NA	-0.312993	1	NA	NA	-1.26785	0.0050117	NA	NA	NA	NA
HLA-DQB1	-1.26778	3.24008e-81	-0.563368	0.54105	-2.28709	1.80059e-18	-0.290868	1	NA	NA	NA	NA	0.408136	1.69473e-08	NA	NA	0.507	2.55126e-25	NA	NA	-0.27966	1	0.256364	1	-0.904164	0.447977	NA	NA	NA	NA
BASP1	-1.23777	1.14301e-85	-0.35429	1	-1.12044	1	NA	NA	NA	NA	NA	NA	NA	NA	NA	NA	NA	NA	NA	NA	0.297648	1	NA	NA	NA	NA	NA	NA	NA	NA
AC245128.3	-1.23633	1.13462e-89	-0.513274	0.000429382	NA	NA	NA	NA	NA	NA	NA	NA	NA	NA	NA	NA	NA	NA	NA	NA	NA	NA	NA	NA	NA	NA	NA	NA	NA	NA
THBS1	-1.22932	2.62543e-16	NA	NA	-0.251083	1	NA	NA	NA	NA	NA	NA	NA	NA	NA	NA	NA	NA	NA	NA	NA	NA	NA	NA	NA	NA	-0.395739	1	NA	NA
WARS	-1.22037	2.39453e-80	-2.64383	3.77985e-25	-0.598778	1	NA	NA	NA	NA	NA	NA	NA	NA	NA	NA	NA	NA	NA	NA	NA	NA	NA	NA	NA	NA	NA	NA	NA	NA
TNFAIP8	-1.2163	6.19643e-84	NA	NA	NA	NA	NA	NA	NA	NA	NA	NA	NA	NA	NA	NA	NA	NA	NA	NA	NA	NA	NA	NA	-0.278334	1	0.814377	1	NA	NA
NFKBIA	-1.21503	4.11721e-122	-0.805483	2.20825e-13	-0.69934	1	NA	NA	NA	NA	NA	NA	NA	NA	NA	NA	NA	NA	NA	NA	NA	NA	NA	NA	NA	NA	-0.291479	1	NA	NA
SOD2	-1.20847	1.10996e-101	-0.533021	1	1.53296	0.0013897	0.659219	1	NA	NA	NA	NA	NA	NA	NA	NA	NA	NA	NA	NA	NA	NA	NA	NA	0.312538	1	-1.02307	1	0.516804	1
EHD1	-1.20175	5.42892e-117	NA	NA	0.497224	0.241541	-0.468791	1	NA	NA	NA	NA	NA	NA	NA	NA	NA	NA	NA	NA	0.262742	1	NA	NA	NA	NA	-1.12034	1	NA	NA
PPIF	-1.17077	8.40271e-84	0.359584	0.0173019	-0.950216	1	NA	NA	NA	NA	NA	NA	NA	NA	NA	NA	NA	NA	NA	NA	0.292139	0.0553736	NA	NA	NA	NA	-1.49567	1	NA	NA
NLRP3	-1.14897	8.37812e-72	-0.680234	0.00258391	NA	NA	NA	NA	NA	NA	NA	NA	NA	NA	NA	NA	NA	NA	NA	NA	NA	NA	NA	NA	-0.318283	1	NA	NA	NA	NA
SAT1	-1.14087	1.38211e-93	-0.367951	1	-0.515857	1	0.325684	1	0.341654	5.94781e-67	NA	NA	NA	NA	NA	NA	NA	NA	NA	NA	NA	NA	0.278369	1	0.609751	1	-1.29115	1	NA	NA
PMAIP1	-1.14042	4.26673e-61	-1.42419	7.61425e-14	-0.680067	1	-0.774578	1	NA	NA	NA	NA	0.329764	0.79407	-0.282491	1	0.398486	5.02281e-05	0.370315	2.83193e-05	-0.634589	0.351062	0.41601	1	NA	NA	0.622453	1	-0.263927	1
H2AFY	-1.12776	7.8622e-89	-1.23929	2.11945e-17	-1.27664	0.28014	-1.15109	9.12646e-05	NA	NA	NA	NA	NA	NA	NA	NA	NA	NA	NA	NA	NA	NA	-0.855514	0.00249017	-1.25512	1	NA	NA	NA	NA
EIF4E	-1.12652	1.07032e-73	-0.6058	1	-0.386996	1	NA	NA	NA	NA	NA	NA	NA	NA	NA	NA	NA	NA	NA	NA	NA	NA	NA	NA	NA	NA	-0.718291	1	NA	NA
PPP1R15A	-1.11636	8.187e-120	-1.05233	1.35613e-12	-0.798133	0.403308	-0.395986	1	NA	NA	NA	NA	NA	NA	NA	NA	NA	NA	NA	NA	NA	NA	NA	NA	NA	NA	-0.758639	1	-0.268934	1
SERPINB9	-1.10704	9.08763e-82	-0.29223	1	-1.00347	1	NA	NA	NA	NA	NA	NA	0.295049	4.7377e-09	NA	NA	NA	NA	NA	NA	NA	NA	NA	NA	NA	NA	NA	NA	-0.312358	1
BCL2A1	-1.0903	3.32048e-87	-0.830428	0.000322791	NA	NA	NA	NA	NA	NA	NA	NA	0.710013	1.39293e-23	NA	NA	0.378532	1.56314e-05	NA	NA	NA	NA	0.402829	1	NA	NA	NA	NA	NA	NA
REL	-1.0866	3.67053e-114	-1.19852	9.44338e-15	-1.07791	0.0161227	-0.738241	1	NA	NA	NA	NA	NA	NA	-0.325122	1	NA	NA	-0.274062	1.379e-05	NA	NA	NA	NA	NA	NA	-0.363483	1	-0.417966	1
HLA-DRB1	-1.08474	2.15413e-86	NA	NA	-1.94699	2.67903e-16	-0.573197	1	NA	NA	-0.348937	6.03616e-22	NA	NA	NA	NA	NA	NA	NA	NA	NA	NA	NA	NA	-0.707446	1	NA	NA	NA	NA
ICAM1	-1.0797	2.40459e-84	-0.631932	0.309024	-0.285276	1	-0.347241	1	NA	NA	NA	NA	NA	NA	NA	NA	0.311781	8.28962e-10	NA	NA	NA	NA	NA	NA	-0.396433	1	NA	NA	NA	NA
PHLDA2	-1.05444	7.82697e-45	NA	NA	-1.17042	1	NA	NA	NA	NA	NA	NA	NA	NA	NA	NA	NA	NA	NA	NA	NA	NA	NA	NA	NA	NA	NA	NA	NA	NA
VEGFA	-1.05247	1.74189e-60	NA	NA	-1.43677	1	NA	NA	NA	NA	NA	NA	NA	NA	NA	NA	NA	NA	NA	NA	NA	NA	NA	NA	NA	NA	NA	NA	NA	NA
HMGA1	-1.05053	9.61028e-76	-0.385924	1	-0.707345	1	NA	NA	NA	NA	NA	NA	NA	NA	NA	NA	NA	NA	NA	NA	NA	NA	NA	NA	NA	NA	NA	NA	NA	NA
MIR22HG	-1.0499	2.04403e-73	-0.820314	1.56293e-09	-0.819846	0.479616	-0.500771	0.0552616	NA	NA	NA	NA	NA	NA	NA	NA	NA	NA	NA	NA	NA	NA	NA	NA	NA	NA	NA	NA	NA	NA
ABCA1	-1.0476	1.01529e-57	-0.57221	1	NA	NA	NA	NA	NA	NA	NA	NA	0.271674	2.60218e-13	NA	NA	NA	NA	NA	NA	NA	NA	NA	NA	-0.394674	1	NA	NA	NA	NA
NINJ1	-1.02281	1.19552e-90	-0.428744	1	NA	NA	-0.276087	1	NA	NA	0.319103	2.55405e-40	0.370158	1.17899e-11	NA	NA	0.284572	3.00645e-07	0.314224	1.93324e-10	NA	NA	0.369966	1	NA	NA	NA	NA	NA	NA
PNRC1	-1.0186	1.40652e-127	-0.634098	2.62584e-08	NA	NA	NA	NA	NA	NA	NA	NA	NA	NA	NA	NA	-0.261544	4.00167e-16	NA	NA	NA	NA	NA	NA	0.444551	1	2.1254	1	NA	NA
BTG1	-1.01216	2.63815e-108	-1.35912	2.10886e-25	NA	NA	0.468457	1	NA	NA	-0.282709	4.01723e-70	NA	NA	-0.435243	1.79327e-07	NA	NA	NA	NA	-0.670598	0.328472	NA	NA	1.09052	0.00898743	0.349101	1	NA	NA
GNLY	-0.98604	2.81417e-08	-1.52376	1	-1.03673	1	-0.919656	1	NA	NA	-1.08908	1.34005e-38	-0.432261	0.170448	NA	NA	NA	NA	NA	NA	0.347075	1	0.806176	1	NA	NA	NA	NA	-1.8539	1.47337e-05
LCP2	-0.981051	3.58312e-98	-0.630558	0.000373422	0.256753	1	NA	NA	NA	NA	NA	NA	NA	NA	NA	NA	NA	NA	NA	NA	NA	NA	NA	NA	NA	NA	NA	NA	NA	NA
DNAAF1	-0.981014	3.63582e-38	-0.738427	0.667745	NA	NA	NA	NA	NA	NA	NA	NA	NA	NA	NA	NA	NA	NA	NA	NA	0.581297	1	NA	NA	NA	NA	NA	NA	NA	NA
CDKN1A	-0.971967	1.10331e-70	-0.380787	1	-0.848121	0.558906	-0.291862	1	NA	NA	NA	NA	NA	NA	NA	NA	NA	NA	NA	NA	0.515679	0.00682294	0.514429	1	NA	NA	-1.37863	1	NA	NA
AL118516.1	-0.970011	9.79787e-64	-0.649925	1.54981e-06	-0.528643	1	NA	NA	NA	NA	NA	NA	NA	NA	NA	NA	NA	NA	NA	NA	NA	NA	NA	NA	NA	NA	NA	NA	NA	NA
AC016831.1	-0.968968	1.23838e-69	-0.505311	0.0015091	-0.596739	1	NA	NA	NA	NA	NA	NA	NA	NA	NA	NA	NA	NA	NA	NA	NA	NA	NA	NA	NA	NA	NA	NA	NA	NA
EGR1	-0.963829	6.15699e-19	-0.593946	1	-0.432894	1	-0.791305	1	NA	NA	NA	NA	-0.260919	1	NA	NA	NA	NA	-0.370533	1	NA	NA	NA	NA	-1.17549	1	NA	NA	-0.444742	1
PNP	-0.953985	3.95163e-78	NA	NA	-0.427287	1	NA	NA	NA	NA	NA	NA	NA	NA	NA	NA	NA	NA	NA	NA	NA	NA	NA	NA	NA	NA	-0.461329	1	NA	NA
H2AFZ	-0.952231	1.1467e-72	-1.60733	7.00066e-19	-0.949888	0.479616	-1.09076	9.12646e-05	-0.459609	1.49339e-142	-0.401325	7.01015e-35	-0.311066	0.0109393	0.374066	1	-0.347027	9.41285e-17	-0.441307	3.17511e-08	NA	NA	-1.35534	0.00290418	-0.696897	1	-0.725692	1	NA	NA
THAP2	-0.942173	2.75315e-62	-0.982451	4.29809e-08	-0.301243	1	NA	NA	NA	NA	NA	NA	NA	NA	NA	NA	NA	NA	NA	NA	NA	NA	NA	NA	NA	NA	NA	NA	NA	NA
TNFAIP3	-0.941533	1.9107e-74	-0.456307	1	NA	NA	0.59933	1	NA	NA	NA	NA	NA	NA	-0.286786	1	NA	NA	NA	NA	NA	NA	NA	NA	0.93559	0.0240914	-2.38197	1	-0.408449	1
RGS1	-0.940527	2.76933e-23	-1.22403	1.59379e-08	-0.91986	0.0595057	0.606049	1	NA	NA	-0.264035	1.87976e-16	NA	NA	-0.641658	1	NA	NA	NA	NA	NA	NA	NA	NA	NA	NA	2.17931	1	NA	NA
PIM3	-0.940076	2.06099e-90	NA	NA	-1.0176	0.0223543	NA	NA	NA	NA	0.409078	3.27885e-35	NA	NA	NA	NA	0.312324	1.11908e-11	0.283669	0.00764243	NA	NA	0.413085	1	0.318571	1	1.39529	1	NA	NA
AES	-0.935808	7.28944e-61	-0.741022	1.83341e-07	-0.915048	0.813466	-1.37221	7.35615e-06	-0.761494	1.05835e-178	-0.479102	8.9664e-36	-0.397449	6.734e-06	0.404339	1	-0.331117	0.00123975	-0.802618	1.23639e-16	-0.32511	1	-1.38975	0.000388987	-0.533805	1	NA	NA	-1.00651	0.000278179
CST3	-0.917648	1.69341e-72	-0.576781	1	-2.03681	6.06907e-15	-0.592161	1	NA	NA	NA	NA	NA	NA	NA	NA	NA	NA	NA	NA	NA	NA	NA	NA	-0.510891	1	-1.00085	1	NA	NA
CD74	-0.902505	1.27516e-63	NA	NA	-1.54861	1.47233e-13	NA	NA	NA	NA	-0.269357	1.24424e-16	NA	NA	0.356375	1	0.665238	1.19883e-46	NA	NA	NA	NA	NA	NA	-1.20166	0.270408	NA	NA	-0.902668	0.121168
VIM-AS1	-0.90153	1.12373e-72	-0.317611	0.0118904	NA	NA	NA	NA	NA	NA	NA	NA	NA	NA	NA	NA	NA	NA	NA	NA	NA	NA	NA	NA	NA	NA	-1.58731	1	NA	NA
IRAK2	-0.892553	3.54599e-60	NA	NA	NA	NA	NA	NA	NA	NA	NA	NA	NA	NA	NA	NA	NA	NA	NA	NA	NA	NA	NA	NA	NA	NA	NA	NA	NA	NA
PLCG2	-0.888258	5.85293e-85	0.610876	0.00051456	0.50585	1	NA	NA	NA	NA	NA	NA	NA	NA	NA	NA	NA	NA	NA	NA	NA	NA	NA	NA	-1.36171	1	2.04828	1	-0.454995	0.000210616
MARCKSL1	-0.88276	1.49178e-52	NA	NA	-1.65468	4.24206e-05	-0.498642	1	NA	NA	NA	NA	-0.262191	2.24904e-07	NA	NA	NA	NA	NA	NA	NA	NA	NA	NA	NA	NA	NA	NA	NA	NA
HLA-DMB	-0.876838	8.8823e-61	NA	NA	-1.24876	2.6955e-08	NA	NA	NA	NA	NA	NA	NA	NA	NA	NA	NA	NA	NA	NA	NA	NA	NA	NA	NA	NA	NA	NA	NA	NA
TNFSF14	-0.875039	8.00366e-38	NA	NA	-0.259059	1	NA	NA	NA	NA	NA	NA	NA	NA	NA	NA	NA	NA	NA	NA	NA	NA	NA	NA	NA	NA	NA	NA	NA	NA
IER2	-0.872221	2.92811e-32	-0.667425	5.84942e-06	-0.888794	0.31948	-0.29646	1	NA	NA	-0.460582	1.9037e-68	-0.52303	2.12525e-43	NA	NA	-0.501853	2.83136e-46	NA	NA	NA	NA	NA	NA	NA	NA	NA	NA	-0.555314	0.125357
CCRL2	-0.871922	1.22839e-54	-0.574314	0.000491823	NA	NA	NA	NA	NA	NA	NA	NA	NA	NA	NA	NA	NA	NA	NA	NA	NA	NA	NA	NA	NA	NA	NA	NA	NA	NA
PTP4A1	-0.86591	1.74142e-65	-0.572277	2.64561e-06	-0.567112	0.813466	-0.764583	0.0103024	-0.277241	1.88697e-85	NA	NA	NA	NA	NA	NA	NA	NA	-0.315012	5.25475e-05	NA	NA	NA	NA	NA	NA	NA	NA	NA	NA
GRASP	-0.864337	7.26201e-45	-1.19779	2.442e-12	-1.41054	1.34842e-10	-0.577307	1	NA	NA	0.326749	3.18936e-41	0.402542	1.00707e-16	0.478333	1	0.662122	3.17888e-30	NA	NA	NA	NA	NA	NA	NA	NA	1.05588	1	NA	NA
PHACTR1	-0.857685	2.45638e-56	-0.284548	0.520433	-1.01883	0.115662	-0.689068	1	NA	NA	NA	NA	NA	NA	NA	NA	NA	NA	-0.320791	1.88242e-05	NA	NA	NA	NA	-0.752004	1	NA	NA	NA	NA
AC020916.1	-0.848865	3.35348e-64	-0.670061	2.57744e-07	-0.526953	1	-0.919232	0.0103024	NA	NA	NA	NA	-0.259116	7.72681e-08	NA	NA	-0.43698	5.86664e-17	-0.374065	7.91937e-10	NA	NA	NA	NA	-0.898546	1	NA	NA	NA	NA
AC015912.3	-0.847425	5.41427e-59	-0.296224	0.300935	NA	NA	NA	NA	NA	NA	NA	NA	NA	NA	NA	NA	NA	NA	NA	NA	NA	NA	NA	NA	NA	NA	NA	NA	NA	NA
ABL2	-0.843487	3.9119e-44	-0.420335	0.245643	NA	NA	NA	NA	NA	NA	NA	NA	NA	NA	NA	NA	NA	NA	NA	NA	NA	NA	NA	NA	NA	NA	1.21583	1	NA	NA
APOBEC3A	-0.840583	5.40765e-17	NA	NA	NA	NA	NA	NA	NA	NA	NA	NA	NA	NA	NA	NA	NA	NA	NA	NA	NA	NA	NA	NA	NA	NA	NA	NA	NA	NA
WDR83OS	-0.840349	8.32281e-70	-0.880581	2.28824e-14	-0.906474	0.479616	-0.453815	1	NA	NA	NA	NA	NA	NA	0.577093	0.0335797	NA	NA	-0.277309	0.0114302	NA	NA	-0.567222	0.0222692	-0.786894	1	NA	NA	NA	NA
RPL10	-0.835188	1.08789e-117	-1.26504	4.0243e-42	-1.14975	1.46137e-16	NA	NA	NA	NA	NA	NA	NA	NA	NA	NA	NA	NA	NA	NA	-0.251015	1	NA	NA	NA	NA	0.477752	1	-0.548527	0.214083
HLA-DMA	-0.830583	9.3277e-79	NA	NA	-1.49982	2.26565e-12	-0.277372	1	NA	NA	NA	NA	NA	NA	NA	NA	NA	NA	NA	NA	NA	NA	NA	NA	-0.587716	0.208731	NA	NA	NA	NA
WTAP	-0.830408	7.77239e-74	-0.411626	1	0.49844	1	NA	NA	NA	NA	NA	NA	NA	NA	0.284974	1	NA	NA	NA	NA	NA	NA	NA	NA	NA	NA	-1.37044	1	NA	NA
HBEGF	-0.828505	1.87646e-41	NA	NA	-0.380584	1	NA	NA	NA	NA	NA	NA	NA	NA	NA	NA	NA	NA	NA	NA	NA	NA	NA	NA	NA	NA	NA	NA	NA	NA
CCL5	-0.825254	3.15553e-16	-1.32335	0.185635	-0.730647	1	NA	NA	-0.384888	3.27932e-11	-0.773853	1.60456e-88	NA	NA	NA	NA	NA	NA	-0.782209	0.0032253	NA	NA	NA	NA	-0.307602	1	-2.60052	1	-1.71846	5.982e-13
AC245014.3	-0.816723	3.42851e-57	-0.415431	0.00346138	NA	NA	-0.292273	1	NA	NA	NA	NA	NA	NA	NA	NA	NA	NA	NA	NA	NA	NA	NA	NA	NA	NA	NA	NA	NA	NA
IL6	-0.811062	1.50023e-10	-1.50592	0.028002	NA	NA	NA	NA	NA	NA	NA	NA	NA	NA	NA	NA	NA	NA	0.25571	0.00186687	NA	NA	NA	NA	NA	NA	NA	NA	NA	NA
SPHK1	-0.809679	1.37714e-45	NA	NA	NA	NA	NA	NA	NA	NA	NA	NA	NA	NA	NA	NA	NA	NA	NA	NA	NA	NA	NA	NA	NA	NA	NA	NA	NA	NA
SMS	-0.806381	2.87026e-68	-0.352714	0.276838	NA	NA	0.292895	1	NA	NA	NA	NA	NA	NA	NA	NA	NA	NA	NA	NA	NA	NA	NA	NA	NA	NA	-1.81453	1	NA	NA
B3GNT5	-0.795828	2.0998e-50	-0.365609	1	-0.509501	1	NA	NA	NA	NA	NA	NA	NA	NA	NA	NA	NA	NA	NA	NA	NA	NA	NA	NA	-0.345011	1	NA	NA	NA	NA
B4GALT1	-0.792128	4.20974e-82	-0.39698	0.898172	-0.511138	1	-0.259241	1	NA	NA	NA	NA	NA	NA	NA	NA	NA	NA	-0.320986	8.94007e-06	0.255898	1	NA	NA	NA	NA	NA	NA	-0.413956	1
AC103591.3	-0.789393	3.24752e-44	-0.756296	2.57744e-07	-0.250515	1	-0.484979	1	NA	NA	NA	NA	NA	NA	NA	NA	NA	NA	NA	NA	NA	NA	NA	NA	NA	NA	NA	NA	NA	NA
SRGN	-0.785331	2.88045e-80	-0.347113	1	-0.491064	1	-0.648223	1	NA	NA	NA	NA	NA	NA	NA	NA	NA	NA	NA	NA	NA	NA	0.355564	1	0.303146	1	-1.13168	1	NA	NA
F3	-0.780513	1.88099e-21	NA	NA	NA	NA	NA	NA	NA	NA	NA	NA	NA	NA	NA	NA	NA	NA	NA	NA	NA	NA	NA	NA	NA	NA	NA	NA	NA	NA
AC016831.5	-0.776746	3.52832e-59	-0.772535	6.45697e-09	-0.767585	1	-1.17209	2.6279e-05	NA	NA	NA	NA	NA	NA	NA	NA	NA	NA	-0.356799	2.49971e-07	NA	NA	-0.364064	1	-0.297537	1	NA	NA	NA	NA
LY6E	-0.767073	3.67734e-57	-0.646131	3.23584e-05	-0.478737	1	NA	NA	NA	NA	NA	NA	NA	NA	NA	NA	0.258173	5.94244e-12	NA	NA	NA	NA	0.327475	1	NA	NA	NA	NA	NA	NA
PLK3	-0.766375	7.23003e-66	-0.412542	0.00831681	-0.396561	1	NA	NA	NA	NA	NA	NA	NA	NA	NA	NA	NA	NA	NA	NA	NA	NA	NA	NA	NA	NA	NA	NA	NA	NA
NR4A1	-0.766198	4.53569e-40	-0.834403	0.000137896	-0.470195	1	NA	NA	NA	NA	NA	NA	NA	NA	NA	NA	NA	NA	-0.408247	2.72352e-05	-0.324567	1	NA	NA	NA	NA	NA	NA	-0.291273	1
SKIL	-0.765835	6.3939e-62	-0.756055	1.06458e-05	-1.06141	0.0206062	-0.446551	1	NA	NA	NA	NA	NA	NA	-0.303965	1	NA	NA	-0.507228	4.92847e-19	NA	NA	NA	NA	-0.715857	1	0.38805	1	NA	NA
SLC25A6	-0.759648	1.65332e-89	-1.08605	1.6152e-29	-0.971454	6.55767e-08	NA	NA	NA	NA	NA	NA	NA	NA	0.296125	1	NA	NA	NA	NA	-0.327341	1	NA	NA	0.357272	1	0.991962	1	NA	NA
LDHB	-0.757432	8.54069e-54	-0.538325	2.1573e-05	-0.731307	0.28014	-1.38043	3.8491e-06	-0.771554	8.93709e-183	-0.448165	9.51892e-28	-0.362881	0.000240418	0.542824	0.692007	NA	NA	NA	NA	NA	NA	-1.53056	1.4156e-06	-1.22674	1	NA	NA	NA	NA
HSPA1B	-0.756506	3.95652e-08	-0.434777	1	-0.371566	1	-0.432418	1	NA	NA	NA	NA	NA	NA	NA	NA	NA	NA	NA	NA	NA	NA	NA	NA	-0.59743	1	NA	NA	NA	NA
RNF19B	-0.756421	1.44719e-63	-0.503521	0.00305675	NA	NA	NA	NA	NA	NA	NA	NA	NA	NA	NA	NA	NA	NA	NA	NA	NA	NA	NA	NA	NA	NA	NA	NA	NA	NA
MINOS1	-0.75507	2.29361e-60	-0.716538	2.29463e-14	-0.400688	1	-0.675364	0.00582403	NA	NA	NA	NA	NA	NA	0.338451	1	NA	NA	NA	NA	NA	NA	-0.596647	0.0201819	-0.266248	1	NA	NA	NA	NA
MARCKS	-0.748173	1.92308e-27	NA	NA	1.15461	1	NA	NA	NA	NA	NA	NA	NA	NA	NA	NA	NA	NA	NA	NA	0.297325	0.769826	NA	NA	NA	NA	NA	NA	NA	NA
OSM	-0.747304	3.01909e-24	NA	NA	NA	NA	NA	NA	NA	NA	NA	NA	NA	NA	NA	NA	NA	NA	NA	NA	NA	NA	NA	NA	NA	NA	NA	NA	NA	NA
PABPC4	-0.741519	4.49315e-43	-1.18977	1.1004e-13	-0.289921	1	NA	NA	NA	NA	NA	NA	NA	NA	NA	NA	NA	NA	NA	NA	0.289977	1	NA	NA	NA	NA	NA	NA	NA	NA
FAM96B	-0.74097	1.24116e-63	-0.707987	4.87534e-09	-0.498926	0.813466	-0.837483	0.000562024	NA	NA	NA	NA	NA	NA	0.306417	1	NA	NA	NA	NA	NA	NA	-0.573648	0.0134365	NA	NA	NA	NA	NA	NA
DDT	-0.740475	2.22192e-49	-0.597955	0.00440337	-0.617513	1	-0.706321	1	NA	NA	NA	NA	NA	NA	0.477266	1	NA	NA	NA	NA	NA	NA	-0.558118	0.0206507	-0.412348	1	1.11452	1	NA	NA
SNHG8	-0.735711	5.40829e-59	-0.692689	9.5859e-07	-0.438524	1	-0.865357	9.12646e-05	NA	NA	NA	NA	NA	NA	1.3055	4.74312e-19	NA	NA	NA	NA	NA	NA	NA	NA	-0.368416	1	NA	NA	NA	NA
ERN1	-0.731461	4.84432e-42	-0.399129	0.194629	NA	NA	NA	NA	NA	NA	NA	NA	NA	NA	NA	NA	NA	NA	NA	NA	0.386204	1	NA	NA	NA	NA	NA	NA	NA	NA
NAF1	-0.730182	6.46829e-38	-0.266389	1	-0.889732	1	NA	NA	NA	NA	NA	NA	NA	NA	NA	NA	NA	NA	NA	NA	NA	NA	NA	NA	NA	NA	NA	NA	NA	NA
MIR4435-2HG	-0.729163	5.37485e-52	NA	NA	NA	NA	NA	NA	NA	NA	NA	NA	NA	NA	NA	NA	NA	NA	NA	NA	NA	NA	NA	NA	NA	NA	NA	NA	NA	NA
ATP13A3	-0.728944	3.23324e-60	0.258146	0.0375541	NA	NA	NA	NA	NA	NA	NA	NA	NA	NA	-0.268602	1	NA	NA	NA	NA	NA	NA	NA	NA	NA	NA	NA	NA	NA	NA
NBPF19	-0.728763	1.51248e-47	-0.472894	0.0184409	NA	NA	NA	NA	NA	NA	NA	NA	NA	NA	NA	NA	NA	NA	NA	NA	NA	NA	NA	NA	NA	NA	NA	NA	NA	NA
SLC7A5	-0.728047	1.16132e-46	NA	NA	-0.819984	1	-0.492166	1	NA	NA	NA	NA	0.25294	0.000117371	0.449354	1	0.336933	1.84491e-18	NA	NA	0.468535	2.5426e-06	0.601266	0.00212646	NA	NA	NA	NA	NA	NA
LIMS1	-0.724518	8.72247e-56	-0.93005	6.43571e-05	-0.32443	1	-0.414985	1	NA	NA	NA	NA	NA	NA	NA	NA	NA	NA	NA	NA	NA	NA	-0.285286	1	-0.729401	1	-0.765017	1	NA	NA
EIF1	-0.719318	3.26453e-134	-0.628742	1.19354e-20	-0.507932	0.00338871	NA	NA	NA	NA	NA	NA	NA	NA	NA	NA	NA	NA	NA	NA	NA	NA	NA	NA	NA	NA	-0.563176	1	-0.302879	1
INHBA	-0.718432	1.62686e-13	-0.636819	1	-0.363094	1	NA	NA	NA	NA	NA	NA	NA	NA	NA	NA	NA	NA	NA	NA	NA	NA	NA	NA	NA	NA	NA	NA	NA	NA
CD86	-0.713781	1.59694e-61	-0.743789	0.000335263	-1.17794	0.000541966	NA	NA	NA	NA	NA	NA	NA	NA	NA	NA	NA	NA	NA	NA	NA	NA	NA	NA	NA	NA	NA	NA	NA	NA
H2AFV	-0.712167	7.0171e-63	-0.888152	3.33446e-13	-0.768111	1	-1.14865	4.91414e-05	-0.36147	2.56655e-117	-0.275994	1.55904e-20	-0.315501	0.00166783	NA	NA	-0.252026	1.02633e-09	-0.450212	2.14552e-12	-0.340514	1	-1.34337	0.000241574	-0.637596	1	NA	NA	NA	NA
CYB5D1	-0.710877	1.57998e-37	-0.528137	0.240893	-0.64392	1	-0.660253	1	NA	NA	NA	NA	NA	NA	NA	NA	NA	NA	NA	NA	NA	NA	NA	NA	NA	NA	NA	NA	NA	NA
CFD	-0.705388	1.76332e-46	-0.54472	0.99977	0.447277	1	NA	NA	NA	NA	NA	NA	NA	NA	NA	NA	NA	NA	NA	NA	NA	NA	NA	NA	NA	NA	NA	NA	NA	NA
SYNJ2	-0.704743	2.56372e-31	NA	NA	-0.626226	1	NA	NA	NA	NA	NA	NA	0.357048	4.07929e-26	NA	NA	0.310191	4.25425e-30	NA	NA	NA	NA	0.403547	1	NA	NA	1.572	1	0.459041	1
LGALS3	-0.704459	9.73973e-48	0.712707	1.38949e-06	NA	NA	NA	NA	NA	NA	NA	NA	NA	NA	NA	NA	NA	NA	NA	NA	0.25269	1	NA	NA	NA	NA	NA	NA	NA	NA
SOCS3	-0.702841	5.08362e-52	-0.474518	0.0388252	-0.418281	1	NA	NA	-0.319829	4.44874e-96	-0.257757	9.74376e-31	NA	NA	-0.847961	0.013081	NA	NA	NA	NA	0.983042	3.80242e-07	NA	NA	0.343649	1	1.60554	1	0.428768	1
FCGRT	-0.69369	1.92837e-82	0.261817	1	-1.04093	0.000127983	-0.69469	1	NA	NA	NA	NA	NA	NA	NA	NA	NA	NA	NA	NA	NA	NA	NA	NA	NA	NA	NA	NA	NA	NA
2007-09-01	-0.692232	6.99742e-52	-0.963929	1.56506e-12	-0.728415	0.813466	-1.10397	4.91414e-05	-0.453118	6.97247e-148	-0.512314	2.08574e-41	-0.459285	3.06346e-06	0.290814	1	-0.320522	6.33426e-05	-0.559332	1.0791e-10	NA	NA	-1.05499	0.00141012	-0.604869	1	NA	NA	NA	NA
AC005280.2	-0.692165	6.60495e-53	-0.332331	0.448237	NA	NA	NA	NA	NA	NA	NA	NA	NA	NA	NA	NA	NA	NA	NA	NA	NA	NA	NA	NA	NA	NA	NA	NA	NA	NA
EGR3	-0.69161	1.87497e-25	-0.646491	1	-0.32569	1	NA	NA	NA	NA	NA	NA	NA	NA	NA	NA	NA	NA	NA	NA	NA	NA	NA	NA	-0.321903	1	NA	NA	NA	NA
LUCAT1	-0.690614	1.39756e-49	-0.350518	0.135183	NA	NA	NA	NA	NA	NA	NA	NA	NA	NA	NA	NA	NA	NA	NA	NA	NA	NA	NA	NA	NA	NA	NA	NA	NA	NA
RPS13	-0.689215	3.18683e-109	-1.00585	3.95646e-23	-0.840611	1.25136e-16	NA	NA	NA	NA	NA	NA	NA	NA	NA	NA	NA	NA	NA	NA	NA	NA	NA	NA	NA	NA	0.720778	1	NA	NA
C11orf96	-0.687046	2.01525e-10	NA	NA	-0.434679	1	NA	NA	NA	NA	NA	NA	NA	NA	NA	NA	NA	NA	NA	NA	NA	NA	NA	NA	-0.281668	1	NA	NA	NA	NA
MAP2K3	-0.686579	2.30443e-68	NA	NA	-0.596453	1	-0.622357	1	NA	NA	NA	NA	NA	NA	NA	NA	NA	NA	NA	NA	NA	NA	NA	NA	NA	NA	-1.13545	1	NA	NA
MIR3945HG	-0.682602	1.39756e-49	-1.15045	6.57133e-08	NA	NA	NA	NA	NA	NA	NA	NA	NA	NA	NA	NA	NA	NA	NA	NA	NA	NA	NA	NA	NA	NA	NA	NA	NA	NA
CD37	-0.68	8.12046e-82	-0.809183	7.1493e-15	-0.985685	0.000779978	NA	NA	NA	NA	NA	NA	NA	NA	NA	NA	NA	NA	NA	NA	NA	NA	NA	NA	-0.384571	1	0.569306	1	NA	NA
DENND5A	-0.679039	4.53231e-52	NA	NA	NA	NA	NA	NA	NA	NA	NA	NA	NA	NA	NA	NA	NA	NA	NA	NA	NA	NA	NA	NA	NA	NA	1.05588	1	NA	NA
METRNL	-0.67807	5.3553e-69	-0.696979	0.000190041	-0.779097	0.00433544	-0.314066	1	NA	NA	-0.505425	1.90376e-48	-0.384477	1.7302e-11	-0.328154	1	-0.554421	3.03045e-74	NA	NA	NA	NA	NA	NA	-0.635281	1	NA	NA	-0.767622	1
RARRES3	-0.675724	5.06176e-50	-0.663499	4.03318e-09	NA	NA	NA	NA	-0.469292	2.08775e-154	-0.577262	2.80597e-60	-0.407599	6.38942e-07	NA	NA	-0.591255	1.30887e-28	NA	NA	NA	NA	-0.856225	0.00365783	-0.514596	1	-0.490221	1	NA	NA
CXCL16	-0.674519	1.24653e-43	-0.857053	9.5373e-06	-1.18427	0.000349926	NA	NA	NA	NA	NA	NA	NA	NA	NA	NA	NA	NA	NA	NA	NA	NA	NA	NA	NA	NA	NA	NA	NA	NA
C12orf57	-0.668475	1.11935e-28	-0.918768	8.84796e-05	-0.598628	1	NA	NA	NA	NA	NA	NA	NA	NA	NA	NA	NA	NA	NA	NA	0.283498	1	NA	NA	0.41676	1	NA	NA	-0.291896	1
RGCC	-0.665679	9.28148e-29	0.390945	1	-0.917908	1	-0.779617	1	-0.675988	0	-0.358354	2.70764e-46	NA	NA	NA	NA	NA	NA	-0.515774	0.000159543	NA	NA	NA	NA	-0.30432	1	-0.763798	1	-0.71357	1
RPL8	-0.659714	6.05758e-71	-1.19926	3.67374e-39	-1.0232	1.18945e-12	NA	NA	NA	NA	NA	NA	NA	NA	0.332223	1	NA	NA	NA	NA	NA	NA	NA	NA	NA	NA	2.44109	1	-0.313224	1
HSPA1A	-0.655712	6.92856e-15	-0.493838	1	-0.555563	1	NA	NA	NA	NA	NA	NA	NA	NA	NA	NA	NA	NA	NA	NA	-0.566544	1	NA	NA	-0.538653	0.327086	NA	NA	NA	NA
NACA	-0.65219	4.73853e-93	-0.927275	4.47796e-27	-0.783486	5.80554e-09	NA	NA	NA	NA	NA	NA	NA	NA	NA	NA	NA	NA	NA	NA	NA	NA	NA	NA	NA	NA	0.540707	1	-0.363892	1
HSPA8	-0.650326	6.05644e-36	-1.32308	3.68356e-18	-0.659444	1	-0.306253	1	-0.354734	4.01362e-181	NA	NA	-0.260981	1.05474e-10	NA	NA	NA	NA	-0.297128	2.26713e-09	NA	NA	-0.38588	1	NA	NA	-0.705916	1	-0.32571	1
CXCL1	-0.648838	1.64899e-08	0.503445	0.000474723	NA	NA	NA	NA	NA	NA	NA	NA	NA	NA	NA	NA	NA	NA	NA	NA	NA	NA	NA	NA	NA	NA	NA	NA	NA	NA
2009-09-01	-0.648602	5.27457e-54	-1.26155	9.9514e-18	-0.652721	1	-1.14323	1.39542e-05	-0.396518	2.67779e-172	-0.374914	3.07654e-57	-0.258398	1.21974e-05	NA	NA	NA	NA	-0.307225	1.04262e-07	NA	NA	-0.656402	0.0229792	-0.310908	1	NA	NA	NA	NA
SNHG15	-0.647567	1.19253e-45	-0.910274	3.20726e-11	-0.51359	1	-0.330897	1	NA	NA	NA	NA	NA	NA	0.511997	0.0657604	NA	NA	NA	NA	NA	NA	NA	NA	NA	NA	NA	NA	NA	NA
TPT1	-0.643113	4.66706e-100	-0.630747	8.56795e-17	-0.471534	7.91144e-05	0.251059	1	NA	NA	0.266622	9.42717e-103	NA	NA	NA	NA	NA	NA	NA	NA	NA	NA	NA	NA	0.370543	1	0.597012	1	NA	NA
MAFF	-0.639408	2.0601e-57	NA	NA	-1.08991	0.00139271	NA	NA	NA	NA	NA	NA	NA	NA	0.376105	1	NA	NA	NA	NA	NA	NA	NA	NA	-0.254141	1	NA	NA	NA	NA
USP12	-0.638179	4.67111e-59	-0.343375	1	NA	NA	NA	NA	NA	NA	NA	NA	NA	NA	NA	NA	NA	NA	NA	NA	NA	NA	NA	NA	NA	NA	NA	NA	0.364445	1
CHMP1B	-0.636548	3.19391e-60	-0.674935	0.000119504	-1.49095	3.31188e-05	NA	NA	-0.280342	4.54219e-80	-0.266191	2.80682e-35	NA	NA	-0.498905	1	-0.435421	2.31481e-23	NA	NA	NA	NA	NA	NA	-0.389033	1	0.824819	1	-0.377983	1
RPL29	-0.636427	1.20329e-91	-0.971254	4.8248e-20	-0.758699	4.33022e-13	NA	NA	NA	NA	NA	NA	NA	NA	NA	NA	NA	NA	NA	NA	NA	NA	NA	NA	NA	NA	-0.406647	1	NA	NA
SERPINB2	-0.63495	4.06529e-07	NA	NA	NA	NA	NA	NA	NA	NA	NA	NA	NA	NA	NA	NA	NA	NA	NA	NA	NA	NA	NA	NA	NA	NA	NA	NA	NA	NA
CREM	-0.633975	6.75283e-33	-1.06967	6.29382e-08	-1.98665	2.34293e-11	-0.369379	1	-0.385374	2.38697e-160	-0.384256	3.80045e-57	NA	NA	-0.531626	0.00197143	-0.508709	1.9623e-33	-0.489077	1.40985e-13	-0.298268	1	0.367687	1	0.584672	1	2.26032	1	NA	NA
CLEC7A	-0.628064	1.74163e-33	-0.413497	1	NA	NA	NA	NA	NA	NA	NA	NA	NA	NA	NA	NA	NA	NA	NA	NA	NA	NA	NA	NA	NA	NA	NA	NA	NA	NA
RPS2	-0.627778	4.70861e-69	-0.926171	1.35037e-23	-0.935194	5.8536e-16	NA	NA	NA	NA	NA	NA	NA	NA	NA	NA	NA	NA	NA	NA	-0.373209	0.0707215	NA	NA	NA	NA	1.1567	1	-0.328767	1
TRAF1	-0.62756	9.21878e-22	-0.27744	1	-0.430227	1	NA	NA	NA	NA	NA	NA	NA	NA	NA	NA	0.253815	3.2438e-15	NA	NA	NA	NA	NA	NA	NA	NA	NA	NA	NA	NA
RPL9	-0.624975	5.48141e-82	-0.743227	1.33612e-12	-0.819685	2.67833e-11	NA	NA	NA	NA	NA	NA	NA	NA	-0.309629	1	NA	NA	NA	NA	NA	NA	NA	NA	0.282563	1	0.891949	1	NA	NA
THUMPD3-AS1	-0.62203	6.96668e-49	-0.71487	4.03318e-09	-0.423933	1	-0.982254	0.000168366	NA	NA	NA	NA	NA	NA	NA	NA	NA	NA	-0.483669	4.74029e-15	NA	NA	-0.272544	1	-0.716585	1	NA	NA	NA	NA
SMIM25	-0.621331	1.73795e-47	-1.66239	6.45011e-18	NA	NA	NA	NA	NA	NA	NA	NA	NA	NA	NA	NA	NA	NA	NA	NA	NA	NA	NA	NA	NA	NA	NA	NA	NA	NA
ZMIZ1	-0.61925	6.29777e-57	NA	NA	-0.39832	1	NA	NA	NA	NA	NA	NA	NA	NA	NA	NA	NA	NA	NA	NA	NA	NA	NA	NA	-0.577134	1	NA	NA	NA	NA
IER5L	-0.617598	9.24634e-06	NA	NA	NA	NA	NA	NA	NA	NA	-0.568152	3.54234e-59	-0.63407	7.41464e-24	NA	NA	-0.410559	6.5532e-13	NA	NA	NA	NA	NA	NA	NA	NA	NA	NA	-0.270717	1
RPS5	-0.616845	1.77698e-54	-1.30413	9.23605e-27	-1.09111	2.22528e-14	NA	NA	NA	NA	NA	NA	NA	NA	NA	NA	NA	NA	NA	NA	NA	NA	-0.343391	0.230851	NA	NA	0.646512	1	-0.526252	0.463583
PLEK	-0.616737	2.03526e-23	NA	NA	NA	NA	0.65157	1	NA	NA	NA	NA	NA	NA	-0.338199	1	NA	NA	0.302105	1.14403e-08	NA	NA	0.372441	1	NA	NA	-1.90171	1	NA	NA
PDE4A	-0.614481	2.15649e-37	-0.427742	0.00521366	-0.858194	1	NA	NA	NA	NA	NA	NA	NA	NA	NA	NA	NA	NA	NA	NA	NA	NA	NA	NA	NA	NA	NA	NA	NA	NA
ZFP36L1	-0.612491	4.0854e-25	0.700687	0.00330616	-0.473934	1	NA	NA	NA	NA	NA	NA	-0.344383	2.36501e-06	-0.417793	1	-0.260625	4.18757e-07	NA	NA	NA	NA	-0.338129	1	0.619416	1	NA	NA	-0.467381	1
MFSD2A	-0.610557	7.46626e-18	NA	NA	NA	NA	NA	NA	NA	NA	NA	NA	NA	NA	NA	NA	NA	NA	NA	NA	NA	NA	NA	NA	NA	NA	1.572	1	NA	NA
ELL2	-0.604916	1.48085e-52	NA	NA	NA	NA	-0.318065	1	NA	NA	NA	NA	NA	NA	NA	NA	NA	NA	NA	NA	0.385913	1	NA	NA	NA	NA	2.01208	1	0.288604	1
CLEC4E	-0.603938	5.66069e-34	0.747496	5.33806e-13	0.420065	1.05498e-05	NA	NA	NA	NA	NA	NA	NA	NA	NA	NA	NA	NA	NA	NA	NA	NA	NA	NA	NA	NA	NA	NA	NA	NA
SUPT4H1	-0.603853	3.30518e-36	-1.12562	2.18994e-11	-0.489963	1	-0.509731	1	NA	NA	NA	NA	NA	NA	0.28184	0.0486699	NA	NA	NA	NA	NA	NA	-0.438895	0.154428	-0.292166	1	-1.88948	1	NA	NA
RPL30	-0.596282	5.43391e-86	-0.911508	1.45483e-19	-0.85597	1.71881e-15	NA	NA	NA	NA	NA	NA	NA	NA	NA	NA	NA	NA	NA	NA	NA	NA	NA	NA	0.261214	1	NA	NA	-0.384732	0.111509
BTF3	-0.596132	4.53336e-73	-0.712597	3.6309e-11	-0.71533	2.45478e-06	NA	NA	NA	NA	NA	NA	NA	NA	NA	NA	NA	NA	NA	NA	NA	NA	-0.36947	0.10295	-0.260127	1	NA	NA	NA	NA
RPL18A	-0.594409	5.01618e-69	-1.16968	5.5225e-37	-0.797651	8.35074e-14	NA	NA	NA	NA	NA	NA	NA	NA	NA	NA	NA	NA	NA	NA	NA	NA	NA	NA	NA	NA	0.747279	1	NA	NA
SERTAD1	-0.591446	3.61185e-47	-0.494866	1.70567e-06	-0.541618	1	-0.564333	1	NA	NA	NA	NA	-0.27415	2.53711e-06	NA	NA	-0.42515	1.89945e-28	NA	NA	NA	NA	NA	NA	0.392	1	NA	NA	-0.32916	1
MAT2A	-0.590862	1.20271e-31	NA	NA	-1.31525	2.14448e-07	NA	NA	NA	NA	NA	NA	NA	NA	-0.343776	1	NA	NA	NA	NA	NA	NA	NA	NA	-0.562673	1	NA	NA	NA	NA
LPCAT1	-0.586796	9.55513e-45	-0.382026	1	NA	NA	NA	NA	NA	NA	NA	NA	NA	NA	NA	NA	NA	NA	NA	NA	NA	NA	NA	NA	NA	NA	NA	NA	NA	NA
ATP1B3	-0.580393	3.0375e-61	-0.635597	0.000122578	-1.20324	0.828831	-0.402058	1	NA	NA	NA	NA	NA	NA	NA	NA	NA	NA	-0.267001	0.0010392	NA	NA	NA	NA	NA	NA	2.25901	1	NA	NA
TNFAIP2	-0.579468	6.34672e-31	0.75405	0.000704184	0.393891	1	NA	NA	NA	NA	NA	NA	NA	NA	NA	NA	NA	NA	NA	NA	NA	NA	NA	NA	-0.263856	1	NA	NA	NA	NA
BIRC3	-0.578775	3.58802e-42	-0.410427	1	-0.591057	1	0.284106	1	NA	NA	NA	NA	NA	NA	-0.823641	0.00248615	NA	NA	0.289069	0.011059	0.401308	1	NA	NA	0.297621	1	NA	NA	NA	NA
ZFY	-0.57821	7.04265e-34	-0.952051	3.51869e-13	-0.525529	0.0197258	NA	NA	NA	NA	NA	NA	NA	NA	NA	NA	NA	NA	NA	NA	NA	NA	NA	NA	-0.327536	1	NA	NA	NA	NA
RACK1	-0.570525	2.71111e-65	-0.875242	2.56434e-18	-0.703908	5.22101e-09	NA	NA	NA	NA	NA	NA	NA	NA	NA	NA	NA	NA	NA	NA	-0.275034	0.175974	-0.286558	0.311728	NA	NA	0.684004	1	NA	NA
IFIT2	-0.565253	0.0048006	-1.76379	0.000828241	NA	NA	-0.515178	1	NA	NA	NA	NA	NA	NA	NA	NA	NA	NA	NA	NA	NA	NA	NA	NA	NA	NA	NA	NA	NA	NA
EEF1D	-0.565175	1.5568e-86	-0.744225	1.10109e-09	-0.656268	5.46498e-05	NA	NA	NA	NA	NA	NA	NA	NA	NA	NA	NA	NA	NA	NA	NA	NA	NA	NA	0.508147	1	NA	NA	NA	NA
RBP7	-0.564932	8.75212e-28	0.341139	1	NA	NA	NA	NA	NA	NA	NA	NA	NA	NA	NA	NA	NA	NA	NA	NA	NA	NA	NA	NA	NA	NA	NA	NA	NA	NA
RPL11	-0.564167	2.51675e-80	-0.879114	1.16331e-20	-0.865238	7.73255e-16	NA	NA	NA	NA	NA	NA	NA	NA	NA	NA	NA	NA	NA	NA	NA	NA	NA	NA	NA	NA	1.26704	1	NA	NA
EIF1AY	-0.563916	1.56381e-29	-0.704282	1.17668e-05	-0.435142	0.00888584	-0.28245	1	NA	NA	NA	NA	NA	NA	NA	NA	NA	NA	NA	NA	NA	NA	NA	NA	NA	NA	1.78676	1	NA	NA
STK38L	-0.563251	1.02559e-38	NA	NA	-0.496827	1	NA	NA	NA	NA	NA	NA	NA	NA	NA	NA	NA	NA	NA	NA	NA	NA	NA	NA	NA	NA	NA	NA	NA	NA
SLC25A5	-0.562527	1.34447e-74	-0.674531	4.10345e-08	-0.394374	1	NA	NA	NA	NA	NA	NA	NA	NA	NA	NA	NA	NA	NA	NA	NA	NA	-0.330912	1	NA	NA	-0.697485	1	NA	NA
CCNI	-0.560601	2.35678e-48	-0.819079	3.37176e-13	-0.343849	1	NA	NA	NA	NA	NA	NA	NA	NA	NA	NA	NA	NA	NA	NA	NA	NA	NA	NA	NA	NA	-1.2146	1	-0.41444	1
SRC	-0.559969	4.07352e-28	NA	NA	-0.337343	1	NA	NA	NA	NA	NA	NA	NA	NA	NA	NA	NA	NA	NA	NA	NA	NA	NA	NA	NA	NA	1.21583	1	NA	NA
RPL18	-0.558402	8.82831e-70	-0.9596	1.63429e-22	-0.923317	6.63519e-15	NA	NA	NA	NA	NA	NA	NA	NA	NA	NA	NA	NA	NA	NA	NA	NA	NA	NA	NA	NA	0.763026	1	NA	NA
EEF2	-0.558291	5.33178e-63	-0.617578	3.73768e-10	-0.625817	0.853503	NA	NA	NA	NA	NA	NA	NA	NA	NA	NA	NA	NA	NA	NA	NA	NA	NA	NA	NA	NA	-0.625387	1	-0.309768	1
SPAG9	-0.557928	1.52584e-46	0.439254	0.00807135	-0.557793	1	-0.484116	1	NA	NA	NA	NA	NA	NA	NA	NA	NA	NA	NA	NA	NA	NA	NA	NA	-0.847723	1	1.21965	1	NA	NA
EEF1A1	-0.557591	5.25267e-50	-1.16659	5.93467e-47	-0.722486	8.88091e-20	NA	NA	NA	NA	NA	NA	NA	NA	NA	NA	NA	NA	NA	NA	NA	NA	-0.299329	1	NA	NA	0.967221	1	NA	NA
IFNGR2	-0.556292	3.92255e-45	NA	NA	0.843495	0.00223331	NA	NA	NA	NA	NA	NA	NA	NA	NA	NA	NA	NA	NA	NA	NA	NA	NA	NA	NA	NA	NA	NA	NA	NA
RPL13	-0.554808	1.51699e-66	-0.936438	6.18492e-21	-0.90457	3.43257e-16	NA	NA	NA	NA	NA	NA	NA	NA	NA	NA	NA	NA	NA	NA	NA	NA	NA	NA	0.263251	1	0.705645	1	NA	NA
OASL	-0.554076	5.5349e-17	-0.535491	1	NA	NA	NA	NA	NA	NA	NA	NA	NA	NA	NA	NA	0.266487	8.02375e-16	NA	NA	NA	NA	0.447389	1	NA	NA	NA	NA	NA	NA
ETS2	-0.553298	3.8014e-28	0.428638	0.108807	0.702977	1	NA	NA	NA	NA	NA	NA	NA	NA	NA	NA	NA	NA	NA	NA	NA	NA	NA	NA	-0.795433	1	NA	NA	NA	NA
NORAD	-0.552976	8.38749e-42	-0.798277	4.03318e-09	NA	NA	-0.558167	0.165219	NA	NA	NA	NA	NA	NA	NA	NA	NA	NA	NA	NA	NA	NA	NA	NA	-0.269822	1	-0.915181	1	NA	NA
PPP1R10	-0.552936	2.00999e-24	-0.26203	1	-0.417668	1	-0.644671	1	NA	NA	NA	NA	NA	NA	NA	NA	NA	NA	NA	NA	NA	NA	NA	NA	-0.762846	1	0.601212	1	-0.613982	1
RYBP	-0.552605	3.27562e-74	NA	NA	0.250923	1	0.460263	1	NA	NA	NA	NA	NA	NA	NA	NA	NA	NA	NA	NA	0.317439	0.300859	NA	NA	NA	NA	NA	NA	NA	NA
AAED1	-0.551279	4.55477e-42	-0.552814	2.41505e-06	-0.352183	1	-0.454977	1	NA	NA	NA	NA	NA	NA	NA	NA	NA	NA	NA	NA	NA	NA	NA	NA	-0.579868	1	NA	NA	NA	NA
RPL10A	-0.547967	4.62428e-60	-1.12807	2.29335e-24	-0.864867	1.86683e-11	NA	NA	NA	NA	NA	NA	NA	NA	NA	NA	NA	NA	NA	NA	NA	NA	-0.269438	1	NA	NA	1.039	1	-0.277034	1
NFKBIZ	-0.547333	5.96607e-21	-0.600996	0.140372	-0.545171	1	NA	NA	NA	NA	NA	NA	0.25791	0.00923423	-0.339025	1	0.384601	1.42284e-09	NA	NA	NA	NA	0.291223	1	-0.719392	1	2.20652	1	0.440858	1
SQSTM1	-0.54409	1.31713e-43	-0.377098	0.463019	-0.4361	1	-0.547747	1	NA	NA	NA	NA	NA	NA	NA	NA	NA	NA	NA	NA	NA	NA	0.404493	1	-0.494773	1	NA	NA	-0.347187	1
WDR74	-0.543457	5.63475e-22	NA	NA	NA	NA	0.349986	1	NA	NA	NA	NA	NA	NA	NA	NA	NA	NA	NA	NA	NA	NA	NA	NA	0.603836	1	2.45571	1	0.32349	1
MS4A7	-0.540822	4.34696e-33	-0.909617	1.45193e-07	-0.27159	1	NA	NA	NA	NA	NA	NA	NA	NA	NA	NA	NA	NA	NA	NA	NA	NA	NA	NA	NA	NA	NA	NA	NA	NA
FOSB	-0.540349	1.36627e-26	-0.573677	1	-0.514386	1	-0.586342	1	NA	NA	NA	NA	-0.465529	4.21563e-16	-0.255166	1	NA	NA	NA	NA	NA	NA	NA	NA	-0.671029	1	1.40767	1	-0.560393	0.0143209
SLC43A2	-0.538636	6.44796e-40	NA	NA	0.447694	1	-0.274894	1	NA	NA	NA	NA	NA	NA	NA	NA	NA	NA	NA	NA	NA	NA	NA	NA	-0.252888	1	NA	NA	NA	NA
H1FX	-0.537935	1.14805e-36	-0.858579	4.04816e-07	-0.420403	1	-0.837879	0.0103024	-0.361524	4.97143e-89	-0.301172	5.33901e-16	NA	NA	0.460218	0.235237	0.25109	1	-0.324039	0.0412511	NA	NA	-0.508856	0.00286459	-0.841415	1	-0.490221	1	NA	NA
ISG15	-0.535584	2.82639e-47	-0.676218	0.00259362	-0.658889	1	NA	NA	NA	NA	NA	NA	NA	NA	NA	NA	NA	NA	NA	NA	NA	NA	NA	NA	0.717997	1	0.622453	1	NA	NA
RPS7	-0.534847	1.69979e-62	-0.876568	7.07841e-16	-0.764786	1.71427e-10	NA	NA	NA	NA	NA	NA	NA	NA	NA	NA	NA	NA	NA	NA	NA	NA	NA	NA	NA	NA	0.364406	1	-0.550611	0.847085
Z93241.1	-0.534247	6.86208e-28	NA	NA	NA	NA	NA	NA	NA	NA	NA	NA	NA	NA	NA	NA	NA	NA	NA	NA	NA	NA	NA	NA	NA	NA	NA	NA	NA	NA
RPL15	-0.532218	1.45893e-56	-0.730976	4.74273e-15	-0.723376	3.59167e-13	NA	NA	NA	NA	NA	NA	NA	NA	NA	NA	NA	NA	NA	NA	NA	NA	NA	NA	NA	NA	1.1111	1	NA	NA
PDE4B	-0.531858	6.68273e-43	-0.637496	0.00427408	-0.534972	1	0.384804	1	NA	NA	NA	NA	NA	NA	NA	NA	0.300682	7.85818e-19	NA	NA	NA	NA	0.410956	1	-0.30561	1	1.87098	1	0.255503	1
KLHL21	-0.530567	5.1731e-40	NA	NA	NA	NA	NA	NA	NA	NA	NA	NA	NA	NA	NA	NA	NA	NA	NA	NA	NA	NA	NA	NA	NA	NA	NA	NA	NA	NA
CEBPB	-0.530037	5.5432e-23	NA	NA	NA	NA	NA	NA	NA	NA	NA	NA	NA	NA	NA	NA	NA	NA	NA	NA	NA	NA	0.574427	0.0426477	0.714208	1	NA	NA	NA	NA
ARL4C	-0.529855	1.31879e-05	-1.17751	5.32182e-11	-2.21421	9.24674e-13	NA	NA	-0.251928	4.23562e-85	-0.273774	6.3199e-37	NA	NA	NA	NA	NA	NA	-0.448534	7.1143e-08	-0.305724	1	NA	NA	0.361497	1	2.77743	1	NA	NA
RPS23	-0.529332	2.52042e-70	-1.01107	2.58689e-30	-0.985963	3.19547e-16	NA	NA	NA	NA	NA	NA	NA	NA	NA	NA	NA	NA	NA	NA	-0.25813	0.383421	NA	NA	NA	NA	1.2716	1	NA	NA
ITGAX	-0.528925	1.42128e-32	NA	NA	-0.623846	1	NA	NA	NA	NA	NA	NA	NA	NA	NA	NA	0.289768	6.93014e-21	NA	NA	NA	NA	NA	NA	NA	NA	NA	NA	NA	NA
ARL5B	-0.528486	3.24535e-36	NA	NA	-0.381578	1	NA	NA	NA	NA	NA	NA	NA	NA	NA	NA	NA	NA	NA	NA	NA	NA	NA	NA	-0.465255	1	NA	NA	NA	NA
BTG2	-0.528416	1.84179e-33	-0.311672	1	-1.30532	1.89144e-05	0.39023	1	NA	NA	NA	NA	NA	NA	-0.865859	1.04075e-07	-0.374676	3.75716e-27	NA	NA	0.312403	1	NA	NA	NA	NA	0.866818	1	-0.404615	1
NFKBID	-0.52689	1.48805e-32	NA	NA	-0.779064	0.525717	-0.35927	1	NA	NA	NA	NA	NA	NA	NA	NA	NA	NA	NA	NA	NA	NA	NA	NA	-0.423478	1	NA	NA	-0.586313	1
RPL19	-0.523239	3.68655e-63	-0.870438	1.43625e-18	-0.853224	2.05169e-16	NA	NA	NA	NA	NA	NA	NA	NA	NA	NA	NA	NA	NA	NA	NA	NA	NA	NA	NA	NA	0.878508	1	-0.423536	0.173472
TGIF1	-0.521689	1.12775e-42	NA	NA	-0.377854	1	0.409309	1	NA	NA	NA	NA	NA	NA	NA	NA	NA	NA	NA	NA	NA	NA	NA	NA	NA	NA	1.78676	1	NA	NA
PDE4DIP	-0.519403	8.93883e-24	-0.297233	1	NA	NA	NA	NA	NA	NA	NA	NA	NA	NA	NA	NA	NA	NA	NA	NA	NA	NA	NA	NA	NA	NA	NA	NA	NA	NA
ZC3H12C	-0.516783	4.74528e-19	NA	NA	NA	NA	NA	NA	NA	NA	NA	NA	NA	NA	NA	NA	NA	NA	NA	NA	NA	NA	NA	NA	NA	NA	NA	NA	NA	NA
GPX4	-0.515606	1.70975e-57	-0.327365	1	NA	NA	-0.43529	1	NA	NA	NA	NA	NA	NA	NA	NA	-0.265728	3.69393e-16	NA	NA	-0.413301	0.00021696	NA	NA	-0.428193	1	-3.04267	1	-0.333613	1
IL10RA	-0.514416	7.4373e-56	-0.66296	4.25762e-10	NA	NA	-0.484411	1	NA	NA	NA	NA	NA	NA	NA	NA	NA	NA	NA	NA	NA	NA	NA	NA	NA	NA	0.627356	1	NA	NA
C8orf59	-0.511481	7.81967e-44	-0.448408	9.03496e-06	-0.469096	1	-0.802909	0.00101731	NA	NA	NA	NA	NA	NA	0.389201	0.0125942	NA	NA	NA	NA	NA	NA	-0.437695	0.31153	NA	NA	NA	NA	NA	NA
RPL7A	-0.510459	4.80163e-57	-0.923426	4.48933e-22	-0.82478	7.29513e-16	NA	NA	NA	NA	NA	NA	NA	NA	NA	NA	NA	NA	NA	NA	NA	NA	NA	NA	NA	NA	NA	NA	-0.411007	1
RPL5	-0.50849	7.51842e-55	-1.03028	1.31893e-19	-0.934366	1.77426e-14	NA	NA	NA	NA	NA	NA	NA	NA	NA	NA	NA	NA	NA	NA	NA	NA	NA	NA	NA	NA	0.394276	1	NA	NA
JARID2	-0.507902	4.76739e-49	NA	NA	-0.358809	1	NA	NA	NA	NA	NA	NA	NA	NA	NA	NA	NA	NA	NA	NA	NA	NA	0.303259	1	-0.35386	1	1.57417	1	NA	NA
ID2	-0.507727	2.47777e-18	-0.308005	1	-1.52169	0.0120424	NA	NA	NA	NA	-0.25304	1.51637e-17	-0.360822	3.05026e-11	NA	NA	NA	NA	-0.266419	1	NA	NA	0.27569	1	NA	NA	NA	NA	-0.537237	1
TSPYL2	-0.507705	0.0691345	NA	NA	NA	NA	NA	NA	NA	NA	NA	NA	NA	NA	0.412342	1	0.260461	0.0534473	NA	NA	NA	NA	NA	NA	NA	NA	1.572	1	0.45179	1
CD4	-0.507389	7.34276e-34	NA	NA	-0.314724	1	NA	NA	NA	NA	NA	NA	NA	NA	NA	NA	NA	NA	NA	NA	NA	NA	0.828335	0.154298	NA	NA	NA	NA	0.516457	1
XBP1	-0.505756	9.7745e-41	-0.825008	2.79288e-05	NA	NA	NA	NA	NA	NA	NA	NA	NA	NA	NA	NA	NA	NA	NA	NA	0.332241	1	0.459116	0.172425	NA	NA	1.59785	1	NA	NA
RPL4	-0.504298	1.00806e-46	-0.905989	6.23771e-23	-0.766048	2.05026e-07	NA	NA	NA	NA	NA	NA	NA	NA	NA	NA	NA	NA	NA	NA	NA	NA	-0.281896	1	NA	NA	-0.525988	1	-0.286071	1
GCH1	-0.503913	1.34231e-50	-0.366021	1	0.340756	1	NA	NA	NA	NA	NA	NA	NA	NA	NA	NA	NA	NA	NA	NA	NA	NA	NA	NA	NA	NA	NA	NA	NA	NA
SDC4	-0.499554	1.83342e-28	NA	NA	NA	NA	NA	NA	NA	NA	NA	NA	NA	NA	NA	NA	NA	NA	NA	NA	NA	NA	NA	NA	NA	NA	NA	NA	NA	NA
RPS14	-0.497118	1.04358e-62	-0.960312	3.40768e-23	-0.740989	1.04005e-10	NA	NA	NA	NA	NA	NA	NA	NA	NA	NA	NA	NA	NA	NA	NA	NA	NA	NA	NA	NA	0.388189	1	NA	NA
TIMP1	-0.496681	6.56059e-09	0.438463	1	-0.693853	1	NA	NA	NA	NA	NA	NA	NA	NA	NA	NA	NA	NA	NA	NA	NA	NA	NA	NA	-0.573131	1	-1.61093	1	NA	NA
HEXIM1	-0.494966	1.01162e-18	-0.255353	1	NA	NA	-0.457323	1	NA	NA	NA	NA	NA	NA	-0.254308	1	NA	NA	NA	NA	NA	NA	NA	NA	NA	NA	1.21093	1	-0.322203	1
RIN3	-0.493332	1.52653e-38	-0.723148	3.21195e-08	-0.478586	1	NA	NA	NA	NA	NA	NA	NA	NA	NA	NA	NA	NA	NA	NA	NA	NA	NA	NA	NA	NA	NA	NA	NA	NA
SULF2	-0.492059	5.24951e-25	NA	NA	-0.64293	0.191739	NA	NA	NA	NA	NA	NA	NA	NA	NA	NA	NA	NA	NA	NA	NA	NA	NA	NA	NA	NA	NA	NA	NA	NA
OGFRL1	-0.490253	3.35696e-41	-0.258509	0.0264502	NA	NA	NA	NA	NA	NA	NA	NA	NA	NA	NA	NA	NA	NA	NA	NA	NA	NA	NA	NA	NA	NA	NA	NA	NA	NA
RPL3	-0.490252	9.41247e-42	-1.0249	5.46248e-20	-1.05532	3.52805e-18	NA	NA	NA	NA	NA	NA	NA	NA	-0.275173	0.866065	-0.351353	1.94243e-59	NA	NA	-0.289474	0.0418392	NA	NA	NA	NA	1.65419	1	-0.411979	0.0473238
EIF3L	-0.488543	4.80087e-59	-0.668959	8.40343e-09	-0.777169	0.000311713	-0.253111	1	NA	NA	NA	NA	NA	NA	NA	NA	NA	NA	NA	NA	NA	NA	-0.407073	0.00174167	-0.289094	1	NA	NA	NA	NA
MAP3K8	-0.488512	7.90987e-27	0.638152	0.00443795	-0.496168	1	NA	NA	NA	NA	NA	NA	0.303579	1.01109e-10	0.405249	1	0.434853	1.54223e-25	0.364301	3.07708e-09	0.264356	1	0.876934	2.0868e-08	-0.338635	1	NA	NA	NA	NA
PFDN5	-0.48827	1.1403e-59	-0.357046	1	NA	NA	NA	NA	NA	NA	NA	NA	NA	NA	NA	NA	NA	NA	NA	NA	NA	NA	NA	NA	NA	NA	NA	NA	NA	NA
CD68	-0.487841	6.58413e-41	NA	NA	0.389577	1	-0.417683	1	NA	NA	NA	NA	NA	NA	NA	NA	NA	NA	NA	NA	NA	NA	NA	NA	NA	NA	-2.54603	1	NA	NA
TNIP1	-0.486122	3.02034e-43	0.70325	1.12209e-07	0.682427	0.0966625	-0.371311	1	NA	NA	NA	NA	NA	NA	NA	NA	NA	NA	NA	NA	NA	NA	NA	NA	NA	NA	-1.26019	1	0.317065	1
OTUD4	-0.483784	5.65729e-38	NA	NA	-0.335069	1	NA	NA	NA	NA	NA	NA	NA	NA	NA	NA	NA	NA	NA	NA	NA	NA	NA	NA	NA	NA	NA	NA	NA	NA
PABPC1	-0.482873	1.25855e-54	-1.04831	1.21057e-29	-0.621075	0.00313285	NA	NA	NA	NA	NA	NA	NA	NA	NA	NA	NA	NA	NA	NA	NA	NA	NA	NA	NA	NA	1.56737	1	0.892975	7.44105e-11
NEU4	-0.48277	1.18165e-17	NA	NA	NA	NA	NA	NA	NA	NA	NA	NA	NA	NA	NA	NA	NA	NA	NA	NA	NA	NA	NA	NA	NA	NA	NA	NA	NA	NA
2002-09-01	-0.482723	5.28211e-42	-0.6822	1.63772e-07	-0.626801	0.28014	-0.831621	0.000562024	NA	NA	NA	NA	NA	NA	NA	NA	NA	NA	NA	NA	NA	NA	NA	NA	-0.268727	1	-1.47133	1	NA	NA
AQP9	-0.482129	2.00243e-42	0.700091	7.75162e-12	0.473164	0.0390113	NA	NA	NA	NA	NA	NA	NA	NA	NA	NA	NA	NA	NA	NA	NA	NA	NA	NA	NA	NA	NA	NA	NA	NA
ARFGAP3	-0.479985	4.90723e-40	0.517138	0.000132983	NA	NA	-0.36722	1	NA	NA	NA	NA	NA	NA	NA	NA	NA	NA	NA	NA	0.359458	0.621088	NA	NA	NA	NA	-1.21356	1	NA	NA
PTX3	-0.479654	6.40673e-13	-0.438941	1	NA	NA	NA	NA	NA	NA	NA	NA	NA	NA	NA	NA	NA	NA	NA	NA	NA	NA	NA	NA	NA	NA	NA	NA	NA	NA
2006-09-01	-0.478466	3.41737e-37	-0.712011	4.14951e-08	-0.989425	0.092748	-1.08637	9.12646e-05	-0.497506	2.90842e-205	-0.396411	4.98155e-46	-0.311442	1.74624e-08	NA	NA	-0.289597	3.35151e-13	-0.600173	8.92202e-19	NA	NA	-1.05243	6.96949e-06	-1.20985	1	NA	NA	NA	NA
AC006449.6	-0.477601	1.09265e-40	-0.333979	0.300935	NA	NA	NA	NA	NA	NA	NA	NA	NA	NA	NA	NA	NA	NA	NA	NA	NA	NA	NA	NA	NA	NA	NA	NA	NA	NA
HOTAIRM1	-0.476774	5.38908e-31	-0.687528	1.56293e-09	-0.330664	1	NA	NA	NA	NA	NA	NA	NA	NA	NA	NA	NA	NA	NA	NA	NA	NA	NA	NA	NA	NA	NA	NA	NA	NA
H2AFJ	-0.47554	1.17471e-36	-0.408024	5.1142e-05	-0.276938	1	-0.288557	1	NA	NA	NA	NA	NA	NA	0.454481	0.224575	NA	NA	NA	NA	NA	NA	-0.491547	0.259026	NA	NA	-1.66948	1	NA	NA
EEF1B2	-0.475518	8.78807e-38	-0.877565	3.37977e-14	-0.972441	4.46411e-09	NA	NA	NA	NA	NA	NA	NA	NA	NA	NA	NA	NA	NA	NA	NA	NA	-0.27475	1	0.296107	1	-0.472589	1	NA	NA
AMD1	-0.473795	5.54244e-33	-0.853466	7.16876e-12	-0.297796	1	-0.622387	0.00183043	NA	NA	NA	NA	NA	NA	NA	NA	NA	NA	-0.253076	0.251131	NA	NA	NA	NA	-0.51986	1	-1.53202	1	NA	NA
TMEM107	-0.473613	2.56026e-21	-0.304783	1	NA	NA	NA	NA	NA	NA	NA	NA	NA	NA	NA	NA	NA	NA	NA	NA	NA	NA	NA	NA	-0.258013	1	NA	NA	NA	NA
C6orf48	-0.47215	6.91221e-41	-0.448035	5.83095e-06	-0.650506	0.28014	-0.558254	0.165219	-0.255004	6.74681e-72	NA	NA	NA	NA	NA	NA	NA	NA	NA	NA	NA	NA	-0.29063	1	-0.525307	1	-0.490221	1	NA	NA
DSE	-0.469306	5.7271e-21	0.453639	0.996445	0.26733	1	NA	NA	NA	NA	NA	NA	NA	NA	NA	NA	NA	NA	NA	NA	NA	NA	NA	NA	NA	NA	-2.23768	1	NA	NA
RASSF5	-0.467058	5.91967e-59	-0.693992	0.000212322	-0.844744	0.0303197	NA	NA	NA	NA	NA	NA	0.256489	3.12189e-15	NA	NA	NA	NA	NA	NA	NA	NA	NA	NA	NA	NA	0.622453	1	0.250528	1
RIN2	-0.463583	7.62124e-42	NA	NA	NA	NA	NA	NA	NA	NA	NA	NA	NA	NA	NA	NA	NA	NA	NA	NA	NA	NA	NA	NA	NA	NA	NA	NA	NA	NA
LINC00877	-0.463183	6.53409e-37	-0.521775	1.13109e-07	NA	NA	NA	NA	NA	NA	NA	NA	NA	NA	NA	NA	NA	NA	NA	NA	NA	NA	NA	NA	NA	NA	NA	NA	NA	NA
ST3GAL1	-0.461813	2.70846e-54	NA	NA	NA	NA	NA	NA	NA	NA	NA	NA	NA	NA	NA	NA	NA	NA	NA	NA	NA	NA	NA	NA	NA	NA	1.05197	1	NA	NA
CRTAP	-0.46107	6.14178e-55	NA	NA	NA	NA	NA	NA	NA	NA	NA	NA	NA	NA	NA	NA	NA	NA	NA	NA	NA	NA	NA	NA	NA	NA	NA	NA	NA	NA
RPL26	-0.460348	2.07917e-65	-0.890581	1.83948e-19	-0.692824	3.24661e-09	0.364084	1	0.275627	0	0.347292	9.08077e-193	NA	NA	NA	NA	NA	NA	0.367862	2.5241e-43	NA	NA	NA	NA	0.325442	1	NA	NA	NA	NA
AGO2	-0.45984	2.38578e-39	-0.474109	0.225222	-0.526172	1	-0.333937	1	NA	NA	NA	NA	NA	NA	NA	NA	0.41871	7.66288e-32	NA	NA	NA	NA	NA	NA	-0.38572	1	2.65702	1	NA	NA
NRG1	-0.457753	5.41526e-24	NA	NA	NA	NA	NA	NA	NA	NA	NA	NA	NA	NA	NA	NA	NA	NA	NA	NA	NA	NA	NA	NA	NA	NA	NA	NA	NA	NA
GAS7	-0.457634	6.12632e-39	NA	NA	-0.43049	1	NA	NA	NA	NA	NA	NA	NA	NA	NA	NA	NA	NA	NA	NA	NA	NA	NA	NA	NA	NA	NA	NA	NA	NA
PID1	-0.455276	1.36803e-18	NA	NA	NA	NA	NA	NA	NA	NA	NA	NA	NA	NA	NA	NA	NA	NA	NA	NA	NA	NA	NA	NA	NA	NA	NA	NA	NA	NA
C19orf70	-0.454696	2.36013e-32	-0.503426	2.57744e-07	-0.378568	1	-0.398733	1	NA	NA	NA	NA	NA	NA	0.359483	1	NA	NA	NA	NA	NA	NA	-0.374695	0.153246	-0.306183	1	NA	NA	NA	NA
IFI6	-0.452653	9.28533e-59	NA	NA	NA	NA	NA	NA	NA	NA	NA	NA	NA	NA	NA	NA	0.311315	6.33142e-18	NA	NA	NA	NA	NA	NA	NA	NA	-0.637741	1	NA	NA
PQLC1	-0.451793	5.46198e-38	-0.599095	4.04816e-07	-0.377925	1	-0.606976	0.0103024	NA	NA	NA	NA	NA	NA	NA	NA	NA	NA	NA	NA	NA	NA	NA	NA	NA	NA	NA	NA	NA	NA
SERP1	-0.448812	3.84262e-46	-0.512375	7.55144e-05	NA	NA	NA	NA	NA	NA	NA	NA	NA	NA	NA	NA	NA	NA	NA	NA	NA	NA	NA	NA	NA	NA	0.346647	1	NA	NA
MIR222HG	-0.446724	1.03122e-32	-0.323322	0.0268788	NA	NA	NA	NA	NA	NA	NA	NA	NA	NA	NA	NA	NA	NA	NA	NA	NA	NA	NA	NA	NA	NA	NA	NA	NA	NA
CSF3R	-0.446485	1.45999e-39	0.941777	2.30152e-15	0.394133	1	NA	NA	NA	NA	NA	NA	NA	NA	NA	NA	NA	NA	NA	NA	NA	NA	NA	NA	-0.394862	1	NA	NA	NA	NA
KIAA1551	-0.446104	2.98862e-29	-0.322814	0.0118904	NA	NA	-0.468472	0.825862	NA	NA	NA	NA	NA	NA	NA	NA	NA	NA	NA	NA	NA	NA	-0.260259	1	NA	NA	NA	NA	NA	NA
TGFBI	-0.445402	3.19431e-28	NA	NA	NA	NA	NA	NA	NA	NA	NA	NA	NA	NA	NA	NA	NA	NA	NA	NA	NA	NA	NA	NA	NA	NA	NA	NA	NA	NA
SELENOK	-0.44479	1.71315e-54	-0.2894	1	-0.967118	0.0753423	0.300076	1	NA	NA	NA	NA	NA	NA	NA	NA	NA	NA	NA	NA	0.396558	1	0.306063	1	NA	NA	0.622453	1	NA	NA
EIF3E	-0.444314	2.05554e-54	-0.669494	4.58709e-13	-0.792028	0.0141506	NA	NA	NA	NA	NA	NA	NA	NA	NA	NA	NA	NA	NA	NA	NA	NA	NA	NA	-0.256591	1	NA	NA	NA	NA
ARF5	-0.444212	8.57798e-58	NA	NA	-0.835263	0.00122944	-0.396527	1	NA	NA	NA	NA	NA	NA	NA	NA	NA	NA	NA	NA	-0.2707	1	-0.41161	0.0264018	NA	NA	-1.02627	1	NA	NA
FLNA	-0.443662	6.27796e-32	NA	NA	NA	NA	NA	NA	NA	NA	NA	NA	NA	NA	NA	NA	0.257759	0.000278486	NA	NA	NA	NA	NA	NA	NA	NA	-0.679418	1	-0.758948	0.0304317
FAM129B	-0.441455	3.52641e-33	NA	NA	NA	NA	NA	NA	NA	NA	NA	NA	NA	NA	NA	NA	NA	NA	NA	NA	NA	NA	NA	NA	NA	NA	NA	NA	NA	NA
RAPH1	-0.441386	2.00187e-23	NA	NA	-0.429602	1	NA	NA	NA	NA	NA	NA	NA	NA	NA	NA	NA	NA	NA	NA	NA	NA	NA	NA	NA	NA	NA	NA	NA	NA
ZC3H12A	-0.440322	1.01551e-44	NA	NA	-0.322356	1	NA	NA	NA	NA	NA	NA	NA	NA	NA	NA	NA	NA	NA	NA	NA	NA	0.310418	1	NA	NA	1.73572	1	-0.304604	1
NRIP3	-0.439591	4.69763e-22	-0.258033	1	-0.418293	1	NA	NA	NA	NA	NA	NA	NA	NA	NA	NA	NA	NA	NA	NA	NA	NA	NA	NA	NA	NA	NA	NA	NA	NA
SLC26A2	-0.438795	1.30437e-24	NA	NA	NA	NA	NA	NA	NA	NA	NA	NA	NA	NA	NA	NA	NA	NA	NA	NA	NA	NA	NA	NA	NA	NA	NA	NA	NA	NA
EVI2B	-0.434683	2.70479e-46	NA	NA	NA	NA	0.540092	1	NA	NA	NA	NA	NA	NA	0.265922	1	NA	NA	NA	NA	NA	NA	NA	NA	NA	NA	NA	NA	NA	NA
TYROBP	-0.434475	3.23312e-17	NA	NA	NA	NA	-0.592012	1	NA	NA	NA	NA	-0.306392	1	NA	NA	NA	NA	NA	NA	NA	NA	0.567648	1	-0.309126	1	NA	NA	NA	NA
GLS	-0.432391	2.13396e-26	NA	NA	-0.595362	1	NA	NA	NA	NA	NA	NA	NA	NA	-0.283164	1	NA	NA	NA	NA	NA	NA	NA	NA	NA	NA	1.46513	1	-0.434215	1
PLK2	-0.431809	5.74553e-07	-0.408847	1	NA	NA	NA	NA	NA	NA	NA	NA	NA	NA	NA	NA	NA	NA	NA	NA	NA	NA	NA	NA	NA	NA	NA	NA	NA	NA
CPVL	-0.430453	1.21486e-45	0.602649	0.00457405	-1.1156	0.0967942	NA	NA	NA	NA	NA	NA	NA	NA	NA	NA	NA	NA	NA	NA	NA	NA	NA	NA	NA	NA	NA	NA	NA	NA
RPL7	-0.429554	1.45289e-39	-0.427966	0.000876613	-0.503084	0.023605	NA	NA	NA	NA	NA	NA	NA	NA	NA	NA	NA	NA	NA	NA	NA	NA	NA	NA	NA	NA	0.818661	1	NA	NA
PSMA3-AS1	-0.429525	1.16434e-35	-0.557154	1.63772e-07	-0.477119	1	-0.591632	0.283715	NA	NA	NA	NA	NA	NA	NA	NA	NA	NA	-0.393749	8.97835e-13	NA	NA	-0.343436	1	-0.492467	1	NA	NA	NA	NA
TUBB4B	-0.428799	2.77072e-49	NA	NA	-0.662646	1	-0.342463	1	NA	NA	NA	NA	NA	NA	0.581786	0.00346482	NA	NA	NA	NA	NA	NA	NA	NA	NA	NA	1.37864	1	-0.819486	0.483993
PIK3R5	-0.427183	7.80877e-35	NA	NA	-0.269137	1	-0.290201	1	NA	NA	NA	NA	NA	NA	NA	NA	NA	NA	NA	NA	0.345022	0.148961	NA	NA	NA	NA	NA	NA	NA	NA
RPS18	-0.426986	2.15261e-35	-1.02926	2.53867e-19	-0.841252	1.50284e-13	NA	NA	NA	NA	NA	NA	NA	NA	-0.279381	1	NA	NA	NA	NA	-0.302168	0.0214686	NA	NA	NA	NA	0.353062	1	NA	NA
SIPA1L1	-0.426961	9.33725e-36	NA	NA	-0.479372	1	NA	NA	NA	NA	NA	NA	NA	NA	NA	NA	NA	NA	NA	NA	NA	NA	0.334367	1	NA	NA	NA	NA	0.415188	1
BID	-0.426707	1.64149e-38	NA	NA	-0.783556	0.191928	NA	NA	NA	NA	NA	NA	NA	NA	NA	NA	NA	NA	NA	NA	NA	NA	NA	NA	NA	NA	1.21583	1	NA	NA
ARHGAP45	-0.426225	5.23265e-31	-0.761623	2.28254e-10	-0.33934	1	-0.467817	0.485073	-0.271286	4.61334e-85	NA	NA	NA	NA	0.275701	1	NA	NA	NA	NA	NA	NA	-0.398994	1	NA	NA	NA	NA	NA	NA
AP1S2	-0.425311	5.2113e-31	NA	NA	NA	NA	-0.260761	1	NA	NA	NA	NA	NA	NA	NA	NA	NA	NA	NA	NA	NA	NA	NA	NA	NA	NA	-1.2323	1	NA	NA
SAV1	-0.424904	4.66388e-13	-0.293228	1	NA	NA	NA	NA	NA	NA	NA	NA	NA	NA	NA	NA	NA	NA	NA	NA	NA	NA	NA	NA	NA	NA	-1.5208	1	NA	NA
GABARAPL1	-0.42185	3.17674e-45	-0.353079	1	-0.576849	1	NA	NA	NA	NA	NA	NA	NA	NA	0.405179	1	NA	NA	NA	NA	NA	NA	NA	NA	0.457548	1	NA	NA	NA	NA
RGS10	-0.421454	2.12398e-51	NA	NA	-0.901394	0.0969857	NA	NA	NA	NA	NA	NA	NA	NA	NA	NA	NA	NA	NA	NA	NA	NA	NA	NA	0.368222	1	-1.34235	1	0.410021	1
RPS27A	-0.421406	1.81718e-43	-0.81674	2.26153e-17	-0.729971	3.03992e-11	NA	NA	NA	NA	NA	NA	NA	NA	NA	NA	NA	NA	NA	NA	NA	NA	NA	NA	0.405664	1	0.570423	1	-0.393584	0.167324
PRDM1	-0.420472	7.10194e-13	-0.31422	1	NA	NA	-0.269466	1	NA	NA	NA	NA	0.261776	9.56393e-11	NA	NA	NA	NA	NA	NA	0.439432	1	NA	NA	NA	NA	NA	NA	NA	NA
SSFA2	-0.419999	2.53304e-34	-0.598387	3.32452e-05	NA	NA	NA	NA	NA	NA	NA	NA	NA	NA	NA	NA	NA	NA	NA	NA	NA	NA	NA	NA	NA	NA	NA	NA	NA	NA
ARL8B	-0.418834	8.35838e-57	NA	NA	NA	NA	NA	NA	NA	NA	NA	NA	NA	NA	NA	NA	NA	NA	NA	NA	NA	NA	NA	NA	NA	NA	0.910262	1	NA	NA
MED29	-0.418268	2.11589e-43	NA	NA	NA	NA	NA	NA	NA	NA	NA	NA	NA	NA	NA	NA	NA	NA	NA	NA	NA	NA	NA	NA	NA	NA	NA	NA	NA	NA
RPL32	-0.418086	7.41266e-52	-0.816084	4.3235e-14	-0.703057	1.9148e-12	NA	NA	NA	NA	NA	NA	NA	NA	NA	NA	NA	NA	NA	NA	NA	NA	NA	NA	NA	NA	NA	NA	NA	NA
GADD45G	-0.417257	8.67478e-16	NA	NA	-0.471044	1	NA	NA	NA	NA	NA	NA	NA	NA	NA	NA	NA	NA	NA	NA	NA	NA	0.280524	1	NA	NA	NA	NA	NA	NA
ITM2B	-0.416422	3.84085e-37	-0.34089	1	NA	NA	NA	NA	-0.272687	4.29855e-149	NA	NA	NA	NA	NA	NA	NA	NA	NA	NA	NA	NA	-0.432985	0.0294747	NA	NA	-1.45832	1	NA	NA
ZNF267	-0.414447	1.34394e-44	NA	NA	NA	NA	NA	NA	NA	NA	NA	NA	0.383075	1.54016e-15	NA	NA	0.34886	1.96594e-25	NA	NA	NA	NA	NA	NA	0.372773	1	0.622453	1	0.277337	1
ALDH1A1	-0.412301	1.16206e-24	NA	NA	NA	NA	NA	NA	NA	NA	NA	NA	NA	NA	NA	NA	NA	NA	NA	NA	NA	NA	NA	NA	-0.371995	1	NA	NA	NA	NA
STX4	-0.410943	1.17664e-30	NA	NA	-0.527556	1	NA	NA	NA	NA	NA	NA	NA	NA	NA	NA	NA	NA	NA	NA	NA	NA	NA	NA	-0.256677	1	NA	NA	NA	NA
RPL13A	-0.410156	3.4053e-33	-0.763709	1.08856e-14	-0.797257	8.24293e-12	NA	NA	NA	NA	NA	NA	NA	NA	-0.446488	6.98683e-05	NA	NA	NA	NA	-0.274577	0.360001	NA	NA	NA	NA	0.880145	1	NA	NA
RPS3	-0.408306	6.61662e-37	-1.04221	4.84908e-19	-0.617569	6.13683e-09	NA	NA	NA	NA	NA	NA	NA	NA	NA	NA	-0.257466	1.81316e-38	NA	NA	-0.251837	0.143467	NA	NA	NA	NA	0.642313	1	-0.416118	0.659523
NFAT5	-0.40824	1.09356e-37	NA	NA	-0.583069	1	NA	NA	NA	NA	NA	NA	NA	NA	NA	NA	NA	NA	NA	NA	NA	NA	NA	NA	NA	NA	-0.682767	1	NA	NA
CFLAR	-0.407797	8.70462e-37	NA	NA	-0.457157	1	-0.262062	1	NA	NA	NA	NA	NA	NA	NA	NA	NA	NA	0.310377	2.70309e-06	0.501067	8.999e-06	NA	NA	NA	NA	-1.81104	1	0.562429	1
SMAD7	-0.407453	5.13762e-12	-0.344878	1	-0.33442	1	NA	NA	-0.266286	2.65383e-63	-0.358232	1.55537e-33	NA	NA	-0.443967	1	NA	NA	NA	NA	NA	NA	0.297989	1	NA	NA	NA	NA	-0.424425	1
RPS3A	-0.405241	3.81926e-46	-0.794776	2.627e-10	-1.01339	2.78807e-19	NA	NA	NA	NA	NA	NA	NA	NA	NA	NA	NA	NA	NA	NA	NA	NA	NA	NA	0.269188	1	-0.534873	1	-0.336093	1
RPS12	-0.404447	6.83463e-43	-0.930517	8.96042e-19	-0.649274	1.4163e-06	NA	NA	NA	NA	NA	NA	NA	NA	NA	NA	NA	NA	NA	NA	-0.288607	0.438422	NA	NA	0.281232	1	0.322864	1	-0.250011	1
ITGAV	-0.401512	7.80614e-25	NA	NA	NA	NA	NA	NA	NA	NA	NA	NA	NA	NA	NA	NA	NA	NA	NA	NA	NA	NA	NA	NA	-0.254017	1	NA	NA	NA	NA
EIF3K	-0.401039	2.80623e-43	-0.482921	0.000234	-0.451891	1	-0.295371	1	NA	NA	NA	NA	NA	NA	NA	NA	NA	NA	NA	NA	NA	NA	-0.261952	0.874829	NA	NA	0.809217	1	-0.51405	1
BZW1	-0.400699	1.18456e-46	NA	NA	NA	NA	-0.391241	1	NA	NA	NA	NA	NA	NA	NA	NA	NA	NA	NA	NA	NA	NA	NA	NA	NA	NA	1.07772	1	NA	NA
IER5	-0.397467	1.24444e-33	-0.434142	0.0647581	-0.439058	1	NA	NA	NA	NA	-0.407295	2.69473e-60	-0.499284	1.08455e-33	-0.387725	0.877171	-0.50226	3.25985e-31	NA	NA	NA	NA	NA	NA	NA	NA	NA	NA	-0.515451	1
AC016831.7	-0.396356	1.6119e-29	-0.294762	0.0178897	-0.466865	1	-0.580242	0.0317299	NA	NA	NA	NA	NA	NA	NA	NA	NA	NA	-0.258075	0.00165609	NA	NA	-0.254659	1	NA	NA	NA	NA	-0.47401	1
JAK1	-0.394909	3.61003e-50	-0.371204	0.683202	NA	NA	0.349101	1	NA	NA	NA	NA	NA	NA	-0.417233	1	NA	NA	NA	NA	NA	NA	NA	NA	0.46084	1	1.20055	1	0.266075	1
NCR3LG1	-0.39425	9.33033e-17	NA	NA	NA	NA	NA	NA	NA	NA	NA	NA	NA	NA	NA	NA	NA	NA	NA	NA	NA	NA	NA	NA	NA	NA	NA	NA	NA	NA
THAP9-AS1	-0.393893	9.35848e-32	-0.691044	1.644e-08	-0.26419	1	NA	NA	NA	NA	NA	NA	NA	NA	NA	NA	NA	NA	NA	NA	NA	NA	NA	NA	NA	NA	NA	NA	NA	NA
RHOF	-0.391931	1.2073e-12	-0.349881	1	-0.75647	1	-0.306966	1	NA	NA	NA	NA	NA	NA	NA	NA	NA	NA	NA	NA	NA	NA	NA	NA	-0.276152	1	0.61241	1	0.280407	1
RPL14	-0.389425	4.38752e-50	-1.08537	3.50564e-22	-0.805846	7.18106e-10	NA	NA	NA	NA	NA	NA	NA	NA	NA	NA	NA	NA	NA	NA	NA	NA	NA	NA	NA	NA	0.931088	1	NA	NA
RPL23A	-0.389222	4.49084e-36	-0.708532	1.60907e-12	-0.699762	7.32941e-10	NA	NA	NA	NA	NA	NA	NA	NA	NA	NA	NA	NA	NA	NA	NA	NA	NA	NA	0.490438	0.429456	1.50386	1	-0.41078	1
RPS11	-0.388422	3.89088e-38	-0.448264	0.000221121	-0.783975	2.13958e-07	NA	NA	NA	NA	NA	NA	NA	NA	-0.334313	1	NA	NA	NA	NA	NA	NA	NA	NA	NA	NA	0.27577	1	NA	NA
AC007032.1	-0.388086	6.64505e-31	-0.449844	0.000120395	NA	NA	NA	NA	NA	NA	NA	NA	NA	NA	NA	NA	NA	NA	NA	NA	NA	NA	NA	NA	NA	NA	NA	NA	NA	NA
ATF5	-0.386877	8.43838e-43	NA	NA	-0.660774	1	-0.396191	1	NA	NA	NA	NA	NA	NA	NA	NA	NA	NA	NA	NA	NA	NA	NA	NA	NA	NA	NA	NA	NA	NA
CD300E	-0.383956	4.39249e-12	0.609996	0.00324155	0.788313	0.894035	NA	NA	NA	NA	NA	NA	NA	NA	NA	NA	NA	NA	NA	NA	NA	NA	NA	NA	NA	NA	NA	NA	NA	NA
PFKFB3	-0.383409	1.79371e-37	NA	NA	-0.473438	1	NA	NA	NA	NA	NA	NA	NA	NA	NA	NA	NA	NA	NA	NA	NA	NA	0.312053	1	NA	NA	NA	NA	NA	NA
KMO	-0.381889	1.70774e-13	-0.546948	1	NA	NA	NA	NA	NA	NA	NA	NA	NA	NA	NA	NA	NA	NA	NA	NA	NA	NA	NA	NA	NA	NA	NA	NA	NA	NA
MYO9B	-0.381594	5.33514e-45	NA	NA	NA	NA	NA	NA	NA	NA	NA	NA	NA	NA	NA	NA	NA	NA	NA	NA	NA	NA	NA	NA	NA	NA	NA	NA	NA	NA
TNFSF8	-0.380561	6.02814e-13	NA	NA	NA	NA	NA	NA	NA	NA	NA	NA	NA	NA	0.273571	1	NA	NA	NA	NA	NA	NA	NA	NA	0.486299	1	1.43548	1	NA	NA
SNX9	-0.380201	5.13536e-34	-0.41545	1	-1.02702	0.00450754	-0.309361	1	0.366861	3.70289e-106	0.41798	1.54401e-92	0.619937	4.85716e-42	0.46943	1	NA	NA	NA	NA	NA	NA	0.530432	1	0.317608	1	1.87179	1	0.667678	0.12128
KYNU	-0.379491	1.26466e-27	0.263551	1	0.488499	1	NA	NA	NA	NA	NA	NA	NA	NA	NA	NA	NA	NA	NA	NA	NA	NA	NA	NA	NA	NA	NA	NA	NA	NA
FOSL2	-0.379368	9.94919e-37	-0.487666	0.483541	-0.401228	1	NA	NA	NA	NA	NA	NA	NA	NA	NA	NA	NA	NA	NA	NA	NA	NA	0.285912	1	-0.570796	1	1.56	1	NA	NA
ETV3	-0.37808	2.61015e-50	NA	NA	-1.26316	0.000439914	-0.658319	1	NA	NA	NA	NA	NA	NA	NA	NA	NA	NA	NA	NA	NA	NA	NA	NA	-0.33623	1	NA	NA	NA	NA
CLEC5A	-0.377222	1.6956e-20	NA	NA	NA	NA	NA	NA	NA	NA	NA	NA	NA	NA	NA	NA	NA	NA	NA	NA	NA	NA	NA	NA	NA	NA	NA	NA	NA	NA
RNASET2	-0.37671	5.64075e-67	-0.361517	0.0173688	-0.885081	0.00149537	-0.275594	1	NA	NA	NA	NA	NA	NA	-0.317673	1	NA	NA	NA	NA	NA	NA	NA	NA	NA	NA	-0.830893	1	0.619404	1
TNFRSF1B	-0.376386	8.4412e-30	0.33262	1	-0.289728	1	NA	NA	NA	NA	NA	NA	NA	NA	NA	NA	NA	NA	-0.33811	0.00892053	NA	NA	NA	NA	NA	NA	NA	NA	NA	NA
LINC01588	-0.375703	1.11147e-27	-0.313403	0.0403302	-0.311754	1	NA	NA	NA	NA	NA	NA	NA	NA	NA	NA	NA	NA	NA	NA	NA	NA	NA	NA	NA	NA	NA	NA	NA	NA
HCAR3	-0.375576	1.41806e-29	-0.362914	1	NA	NA	NA	NA	NA	NA	NA	NA	NA	NA	NA	NA	NA	NA	NA	NA	NA	NA	NA	NA	NA	NA	NA	NA	NA	NA
COL4A3BP	-0.375181	1.68113e-27	-0.902819	5.59836e-13	NA	NA	-0.376318	1	NA	NA	NA	NA	NA	NA	NA	NA	NA	NA	NA	NA	NA	NA	NA	NA	-0.335415	1	NA	NA	NA	NA
TSC22D2	-0.375117	2.81647e-28	-0.440037	0.0169868	-0.509307	1	NA	NA	NA	NA	NA	NA	NA	NA	-0.314488	1	NA	NA	NA	NA	NA	NA	NA	NA	-0.607162	1	1.572	1	-0.561039	1
CHCHD10	-0.375045	3.88839e-45	-0.328262	1	NA	NA	NA	NA	NA	NA	NA	NA	NA	NA	NA	NA	NA	NA	NA	NA	0.462773	0.000305295	NA	NA	NA	NA	NA	NA	NA	NA
RAB20	-0.374878	5.49417e-43	NA	NA	NA	NA	NA	NA	NA	NA	NA	NA	NA	NA	NA	NA	NA	NA	NA	NA	NA	NA	NA	NA	NA	NA	NA	NA	NA	NA
LITAF	-0.374188	7.08569e-49	0.331158	1	-0.569953	1	-0.550578	1	NA	NA	NA	NA	NA	NA	NA	NA	NA	NA	NA	NA	NA	NA	NA	NA	0.348659	1	1.19364	1	NA	NA
FAU	-0.373374	5.53797e-51	-0.527611	5.86136e-07	-0.507825	0.000333449	NA	NA	NA	NA	NA	NA	NA	NA	0.284953	0.784052	NA	NA	NA	NA	NA	NA	NA	NA	0.26905	1	0.720918	1	-0.349978	1
PRKAG2	-0.373118	2.1011e-43	NA	NA	NA	NA	-0.269069	1	NA	NA	NA	NA	NA	NA	NA	NA	NA	NA	NA	NA	NA	NA	NA	NA	NA	NA	NA	NA	NA	NA
QARS	-0.372609	9.46239e-34	-0.468268	9.03496e-06	-0.250701	1	-0.430437	1	NA	NA	NA	NA	NA	NA	NA	NA	NA	NA	NA	NA	NA	NA	NA	NA	-0.552598	1	NA	NA	NA	NA
TBC1D7	-0.371311	1.73266e-20	NA	NA	NA	NA	-0.30639	1	NA	NA	NA	NA	NA	NA	NA	NA	NA	NA	NA	NA	NA	NA	NA	NA	NA	NA	NA	NA	NA	NA
IFI30	-0.371215	8.92009e-33	-0.504727	0.292594	-0.633487	1	NA	NA	NA	NA	NA	NA	NA	NA	NA	NA	NA	NA	NA	NA	NA	NA	NA	NA	NA	NA	NA	NA	NA	NA
ATP2B1	-0.370065	1.47253e-09	NA	NA	0.424806	1	-0.276446	1	NA	NA	NA	NA	NA	NA	NA	NA	0.324488	1.51829e-16	NA	NA	NA	NA	NA	NA	-1.02242	1	NA	NA	-0.276727	1
JUNB	-0.368828	5.24399e-16	-0.715234	5.89497e-06	-0.937171	0.0345777	-0.270836	1	-0.551548	3.91222e-308	-0.524437	1.23523e-131	-0.563438	6.59175e-43	-0.667968	0.000220612	-0.488038	2.2472e-28	NA	NA	NA	NA	NA	NA	NA	NA	2.98274	1	NA	NA
BANP	-0.368604	8.10079e-12	NA	NA	-0.32307	1	NA	NA	NA	NA	NA	NA	NA	NA	NA	NA	NA	NA	NA	NA	NA	NA	NA	NA	0.259743	1	1.52024	1	NA	NA
AC245297.3	-0.367437	2.49032e-29	-0.270478	0.0178897	-0.262684	1	NA	NA	NA	NA	-0.259922	1.95235e-27	NA	NA	NA	NA	NA	NA	-0.551064	1.14642e-19	NA	NA	NA	NA	-0.352077	1	NA	NA	-0.970387	0.0988835
AGAP3	-0.367013	4.317e-18	NA	NA	NA	NA	NA	NA	NA	NA	NA	NA	NA	NA	NA	NA	NA	NA	NA	NA	NA	NA	NA	NA	NA	NA	NA	NA	NA	NA
DUSP5	-0.366605	2.47683e-25	NA	NA	-0.509316	1	-0.325868	1	NA	NA	NA	NA	NA	NA	-0.255071	1	NA	NA	NA	NA	NA	NA	NA	NA	NA	NA	NA	NA	NA	NA
ACOD1	-0.363765	1.27801e-06	-0.420731	1	NA	NA	NA	NA	NA	NA	NA	NA	NA	NA	NA	NA	NA	NA	NA	NA	NA	NA	NA	NA	NA	NA	NA	NA	NA	NA
DDIT4	-0.363734	3.68751e-31	NA	NA	-0.805027	1	0.598441	1	NA	NA	NA	NA	NA	NA	NA	NA	NA	NA	0.258851	4.21145e-05	0.299177	1	0.394541	1	-0.353935	1	NA	NA	NA	NA
RPL21	-0.363593	9.76821e-38	-0.705622	8.18537e-18	-0.670315	4.67582e-09	NA	NA	NA	NA	NA	NA	NA	NA	NA	NA	NA	NA	NA	NA	NA	NA	NA	NA	0.42189	1	0.35194	1	-0.275271	1
RPL24	-0.363273	4.87155e-36	-0.43664	0.00250616	-0.616397	7.71871e-06	NA	NA	NA	NA	NA	NA	NA	NA	NA	NA	NA	NA	NA	NA	NA	NA	NA	NA	NA	NA	-0.374484	1	NA	NA
LYPD3	-0.363054	2.47832e-08	NA	NA	-0.336439	1	NA	NA	NA	NA	NA	NA	NA	NA	NA	NA	NA	NA	NA	NA	NA	NA	NA	NA	0.290996	1	NA	NA	NA	NA
RPS24	-0.362552	1.84906e-44	-0.526536	8.71912e-11	-0.599263	6.22851e-12	NA	NA	NA	NA	NA	NA	NA	NA	NA	NA	NA	NA	NA	NA	NA	NA	NA	NA	NA	NA	1.04295	1	NA	NA
EIF4A3	-0.362154	1.45333e-41	-0.3273	1	NA	NA	-0.298274	1	NA	NA	NA	NA	NA	NA	NA	NA	NA	NA	NA	NA	0.392461	0.921503	NA	NA	0.500551	1	NA	NA	NA	NA
RPL6	-0.361511	1.46564e-36	-0.633751	1.3233e-08	-0.539596	7.25871e-07	NA	NA	NA	NA	NA	NA	NA	NA	NA	NA	NA	NA	NA	NA	NA	NA	NA	NA	NA	NA	NA	NA	NA	NA
FLT1	-0.360946	8.9146e-08	0.519695	1.45699e-08	NA	NA	NA	NA	NA	NA	NA	NA	NA	NA	NA	NA	NA	NA	NA	NA	NA	NA	NA	NA	NA	NA	NA	NA	NA	NA
CSRNP1	-0.360267	2.64298e-45	-0.477438	2.67767e-05	-0.560964	1	-0.294816	1	NA	NA	NA	NA	NA	NA	NA	NA	NA	NA	NA	NA	NA	NA	NA	NA	NA	NA	NA	NA	NA	NA
DOT1L	-0.359531	4.48823e-37	NA	NA	NA	NA	NA	NA	NA	NA	NA	NA	NA	NA	NA	NA	NA	NA	NA	NA	NA	NA	NA	NA	NA	NA	NA	NA	NA	NA
TGFB1	-0.359077	5.10501e-47	NA	NA	-0.671822	1	-0.578184	1	NA	NA	NA	NA	NA	NA	NA	NA	NA	NA	-0.28428	1.1112e-05	NA	NA	NA	NA	NA	NA	-2.73123	1	-0.393517	1
IFI44L	-0.358573	1.20251e-09	NA	NA	-0.397526	1	-0.583499	1	NA	NA	NA	NA	NA	NA	NA	NA	NA	NA	NA	NA	NA	NA	NA	NA	NA	NA	2.16854	1	0.90345	1
HIVEP1	-0.355619	4.53779e-37	-0.359065	0.00221731	NA	NA	NA	NA	NA	NA	NA	NA	NA	NA	NA	NA	NA	NA	NA	NA	NA	NA	NA	NA	NA	NA	1.572	1	0.997461	3.42581e-08
SRSF5	-0.353468	4.47405e-31	-0.532096	0.00681514	-0.413641	1	-0.424529	1	NA	NA	NA	NA	NA	NA	-0.355173	1	NA	NA	NA	NA	NA	NA	NA	NA	NA	NA	0.396747	1	-0.399064	1
EIF3F	-0.353052	2.7081e-57	-0.950823	2.16043e-14	-0.832675	0.00171883	NA	NA	NA	NA	NA	NA	NA	NA	NA	NA	NA	NA	NA	NA	NA	NA	-0.297766	1	NA	NA	-0.992616	1	NA	NA
EIF3M	-0.352663	3.00001e-59	NA	NA	-0.49183	1	-0.276911	1	NA	NA	NA	NA	NA	NA	NA	NA	NA	NA	NA	NA	NA	NA	NA	NA	-0.381554	1	1.18203	1	NA	NA
PURB	-0.352277	1.44987e-41	NA	NA	-0.410204	1	NA	NA	NA	NA	NA	NA	NA	NA	NA	NA	NA	NA	NA	NA	NA	NA	NA	NA	NA	NA	NA	NA	NA	NA
DNAJB1	-0.352235	3.36572e-51	-0.451912	0.0268313	-0.314316	1	-0.504006	1	-0.340759	1.04903e-122	-0.329585	7.51115e-67	NA	NA	NA	NA	NA	NA	-0.274835	7.95856e-08	NA	NA	-0.342305	1	0.455693	1	-1.34478	1	-0.430267	1
RPS16	-0.350776	9.18948e-37	-0.494944	3.57538e-08	-0.662707	2.12637e-10	NA	NA	NA	NA	NA	NA	NA	NA	NA	NA	NA	NA	NA	NA	NA	NA	NA	NA	0.59743	0.0738977	NA	NA	NA	NA
MAP1LC3B	-0.350755	8.64909e-39	NA	NA	-0.392215	1	NA	NA	NA	NA	NA	NA	NA	NA	NA	NA	NA	NA	NA	NA	NA	NA	NA	NA	NA	NA	-1.7119	1	-0.460674	1
GSTP1	-0.350179	1.2864e-18	NA	NA	NA	NA	NA	NA	NA	NA	NA	NA	NA	NA	-0.262227	1	NA	NA	NA	NA	NA	NA	NA	NA	-0.737215	1	NA	NA	NA	NA
HMGN3	-0.34819	9.96246e-50	NA	NA	NA	NA	-0.420813	1	NA	NA	NA	NA	NA	NA	NA	NA	-0.353772	8.3474e-25	NA	NA	NA	NA	NA	NA	-0.684434	1	-0.597792	1	NA	NA
GPR84	-0.34645	6.71003e-29	0.549187	0.00333716	0.302605	0.595349	NA	NA	NA	NA	NA	NA	NA	NA	NA	NA	NA	NA	NA	NA	NA	NA	NA	NA	NA	NA	NA	NA	NA	NA
AL161421.1	-0.345896	3.55809e-24	NA	NA	NA	NA	NA	NA	NA	NA	NA	NA	NA	NA	NA	NA	NA	NA	NA	NA	NA	NA	NA	NA	NA	NA	NA	NA	NA	NA
BTBD19	-0.344885	2.98156e-17	-0.315846	1	NA	NA	NA	NA	NA	NA	NA	NA	NA	NA	NA	NA	NA	NA	NA	NA	NA	NA	NA	NA	NA	NA	NA	NA	NA	NA
PLCB1	-0.344675	7.24751e-20	NA	NA	0.259798	0.275002	NA	NA	NA	NA	NA	NA	NA	NA	NA	NA	NA	NA	NA	NA	NA	NA	NA	NA	NA	NA	NA	NA	NA	NA
RSL1D1	-0.344246	4.96445e-39	NA	NA	-0.254212	1	0.37777	1	NA	NA	NA	NA	NA	NA	NA	NA	NA	NA	NA	NA	NA	NA	NA	NA	NA	NA	-0.667827	1	NA	NA
AC096667.1	-0.343437	1.11057e-26	NA	NA	NA	NA	NA	NA	NA	NA	NA	NA	NA	NA	NA	NA	NA	NA	NA	NA	NA	NA	NA	NA	NA	NA	NA	NA	NA	NA
KLF10	-0.343405	7.95349e-25	NA	NA	NA	NA	-0.375096	1	NA	NA	NA	NA	NA	NA	NA	NA	NA	NA	NA	NA	NA	NA	NA	NA	-0.598553	1	NA	NA	NA	NA
UXT	-0.342979	1.82326e-67	-0.320686	0.236936	-0.405324	1	NA	NA	NA	NA	NA	NA	NA	NA	NA	NA	NA	NA	NA	NA	NA	NA	NA	NA	-0.297891	1	NA	NA	NA	NA
NFKB2	-0.342266	2.10817e-30	-0.341244	0.428166	NA	NA	NA	NA	NA	NA	NA	NA	NA	NA	NA	NA	NA	NA	NA	NA	NA	NA	NA	NA	0.391713	1	NA	NA	NA	NA
SKI	-0.342202	7.88308e-16	NA	NA	-0.25883	1	-0.361582	1	NA	NA	NA	NA	NA	NA	NA	NA	NA	NA	NA	NA	NA	NA	NA	NA	NA	NA	1.35086	1	0.310786	1
PMEPA1	-0.341814	4.53747e-12	NA	NA	-0.986429	0.00077694	-1.31866	2.47965e-05	NA	NA	NA	NA	NA	NA	NA	NA	NA	NA	-0.422939	6.92042e-05	NA	NA	NA	NA	-0.542181	1	NA	NA	NA	NA
FKBP2	-0.341343	2.58676e-20	-0.525688	0.115904	-0.469608	1	-0.871752	1	NA	NA	NA	NA	NA	NA	0.348289	1	NA	NA	NA	NA	NA	NA	-0.271098	1	-0.373059	1	NA	NA	NA	NA
2007-03-01	-0.340943	2.67984e-29	-0.472789	1.39738e-05	NA	NA	-0.615986	0.0103024	NA	NA	NA	NA	NA	NA	NA	NA	NA	NA	NA	NA	NA	NA	-0.257601	1	-0.3849	1	NA	NA	NA	NA
PCBP2	-0.340016	6.60397e-61	NA	NA	-0.292444	1	NA	NA	NA	NA	NA	NA	NA	NA	NA	NA	NA	NA	NA	NA	NA	NA	NA	NA	-0.303742	1	NA	NA	NA	NA
NR4A2	-0.3396	6.022e-50	-0.955885	2.67355e-05	-0.820719	0.151739	-0.682608	1	-0.493884	5.12732e-196	-0.473578	1.0052e-88	-0.28024	6.44822e-10	-0.703075	0.000507551	-0.465054	2.16763e-34	-0.3416	0.000207077	NA	NA	NA	NA	-1.20376	1	0.568713	1	-0.557519	0.151748
SELENOH	-0.33895	1.89613e-46	-0.357189	0.650989	NA	NA	-0.68375	1	NA	NA	NA	NA	NA	NA	NA	NA	NA	NA	NA	NA	NA	NA	NA	NA	-0.528462	1	2.34639	1	NA	NA
CD48	-0.338182	7.98627e-39	-0.782828	4.25432e-11	-0.684478	1	NA	NA	NA	NA	NA	NA	NA	NA	NA	NA	NA	NA	NA	NA	-0.673583	2.834e-06	-0.374767	1	0.77525	0.460212	0.676441	1	NA	NA
RPS6	-0.338124	6.56697e-20	-1.02261	1.24844e-24	-0.678834	3.59737e-08	NA	NA	NA	NA	NA	NA	NA	NA	-0.263024	1	NA	NA	NA	NA	NA	NA	NA	NA	NA	NA	NA	NA	NA	NA
UTRN	-0.337888	5.96085e-40	-0.506111	0.0042273	NA	NA	NA	NA	NA	NA	NA	NA	NA	NA	-0.421512	1	NA	NA	NA	NA	NA	NA	NA	NA	NA	NA	1.78676	1	NA	NA
LRRC75A	-0.337842	1.99855e-17	-0.398254	1	-0.416695	1	NA	NA	NA	NA	NA	NA	NA	NA	0.421105	1	NA	NA	NA	NA	NA	NA	NA	NA	NA	NA	1.21299	1	NA	NA
ATF3	-0.337617	4.98938e-34	-0.417332	1	NA	NA	0.346243	1	NA	NA	NA	NA	0.299228	0.0143177	NA	NA	0.39678	2.46186e-14	NA	NA	0.289115	1	0.616673	1	NA	NA	NA	NA	NA	NA
NRGN	-0.337489	9.28001e-51	NA	NA	0.348078	1	NA	NA	NA	NA	NA	NA	NA	NA	NA	NA	NA	NA	NA	NA	NA	NA	NA	NA	NA	NA	-2.5924	1	NA	NA
USP36	-0.336993	6.82713e-29	-0.406834	0.0015091	-0.346006	1	-0.568031	0.0552616	NA	NA	NA	NA	NA	NA	0.259153	1	NA	NA	NA	NA	NA	NA	-0.267793	1	NA	NA	NA	NA	NA	NA
C19orf24	-0.336461	3.45927e-31	-0.333217	0.00130895	NA	NA	-0.42862	0.825862	NA	NA	NA	NA	NA	NA	NA	NA	NA	NA	NA	NA	NA	NA	-0.292942	1	NA	NA	NA	NA	NA	NA
UBAC2	-0.335884	9.04059e-35	NA	NA	-0.341497	1	NA	NA	NA	NA	NA	NA	NA	NA	NA	NA	NA	NA	NA	NA	NA	NA	NA	NA	NA	NA	-0.861996	1	NA	NA
SLC43A3	-0.335331	4.5011e-37	NA	NA	NA	NA	NA	NA	NA	NA	NA	NA	NA	NA	NA	NA	NA	NA	NA	NA	NA	NA	NA	NA	NA	NA	NA	NA	NA	NA
KMT2E-AS1	-0.335258	8.99611e-30	-0.25255	0.448237	NA	NA	NA	NA	NA	NA	NA	NA	NA	NA	NA	NA	NA	NA	NA	NA	NA	NA	NA	NA	NA	NA	NA	NA	NA	NA
EMD	-0.33522	9.95061e-54	NA	NA	-0.316152	1	NA	NA	NA	NA	NA	NA	NA	NA	NA	NA	NA	NA	NA	NA	NA	NA	NA	NA	NA	NA	-2.07511	1	NA	NA
ZSWIM6	-0.334408	1.28912e-40	NA	NA	NA	NA	NA	NA	NA	NA	NA	NA	NA	NA	NA	NA	NA	NA	NA	NA	NA	NA	NA	NA	NA	NA	NA	NA	NA	NA
SNHG7	-0.333712	2.30641e-28	-0.406763	0.000281505	NA	NA	-1.09099	1.39542e-05	NA	NA	NA	NA	NA	NA	0.573845	0.366836	NA	NA	NA	NA	NA	NA	-0.278245	1	-0.927486	1	NA	NA	NA	NA
NRARP	-0.333466	6.21292e-06	-0.71512	0.0549065	-1.56501	0.000605095	NA	NA	NA	NA	NA	NA	NA	NA	NA	NA	NA	NA	NA	NA	NA	NA	NA	NA	NA	NA	NA	NA	NA	NA
LAPTM5	-0.333357	1.08198e-21	NA	NA	NA	NA	NA	NA	NA	NA	NA	NA	NA	NA	NA	NA	0.273171	2.04398e-12	NA	NA	-0.254383	1	NA	NA	NA	NA	0.55172	1	NA	NA
UBB	-0.33325	1.57251e-35	NA	NA	NA	NA	-0.508883	1	NA	NA	NA	NA	NA	NA	NA	NA	NA	NA	NA	NA	NA	NA	NA	NA	NA	NA	NA	NA	-0.617527	1
SNAI1	-0.332701	5.29564e-25	NA	NA	-0.379647	1	NA	NA	NA	NA	NA	NA	NA	NA	NA	NA	NA	NA	NA	NA	NA	NA	NA	NA	NA	NA	NA	NA	NA	NA
CSKMT	-0.330836	7.19538e-14	0.868117	1	NA	NA	NA	NA	NA	NA	NA	NA	NA	NA	NA	NA	NA	NA	NA	NA	NA	NA	NA	NA	0.279892	1	NA	NA	-0.272245	1
ADA2	-0.330339	3.03983e-41	NA	NA	NA	NA	NA	NA	NA	NA	NA	NA	NA	NA	NA	NA	NA	NA	NA	NA	NA	NA	NA	NA	NA	NA	1.08178	1	NA	NA
MEF2C	-0.330212	1.59478e-36	-0.321507	1	NA	NA	NA	NA	NA	NA	NA	NA	NA	NA	NA	NA	NA	NA	NA	NA	NA	NA	NA	NA	-0.72209	1	1.05197	1	NA	NA
FNDC3A	-0.329731	5.44569e-21	NA	NA	NA	NA	NA	NA	NA	NA	NA	NA	NA	NA	NA	NA	NA	NA	NA	NA	NA	NA	NA	NA	NA	NA	1.11452	1	0.31195	1
MALT1	-0.328789	4.11804e-36	-0.380004	0.0996806	-1.00447	0.518926	-0.498244	1	NA	NA	NA	NA	NA	NA	NA	NA	NA	NA	NA	NA	NA	NA	NA	NA	-0.579364	1	2.24391	1	0.445616	0.14798
NOP53	-0.326618	4.12601e-50	-0.936691	2.75483e-14	-0.565432	0.252764	NA	NA	NA	NA	NA	NA	NA	NA	-0.348707	1	NA	NA	NA	NA	NA	NA	NA	NA	0.287303	1	0.672682	1	NA	NA
TMEM219	-0.325198	8.74179e-56	NA	NA	-0.365225	1	-0.280321	1	NA	NA	NA	NA	NA	NA	NA	NA	NA	NA	NA	NA	NA	NA	NA	NA	-0.340047	1	-2.31085	1	NA	NA
SERPINB8	-0.32493	4.82916e-57	0.26664	0.00337833	NA	NA	NA	NA	NA	NA	NA	NA	NA	NA	NA	NA	NA	NA	NA	NA	NA	NA	NA	NA	NA	NA	NA	NA	NA	NA
RCC2	-0.324918	3.32229e-35	NA	NA	-0.785171	0.477429	NA	NA	NA	NA	NA	NA	NA	NA	NA	NA	NA	NA	NA	NA	NA	NA	NA	NA	-0.325896	1	NA	NA	NA	NA
PHLDB1	-0.324633	4.30161e-17	NA	NA	NA	NA	NA	NA	NA	NA	NA	NA	NA	NA	NA	NA	NA	NA	NA	NA	NA	NA	NA	NA	NA	NA	NA	NA	NA	NA
MYLIP	-0.323677	4.05525e-08	-0.562041	0.058076	NA	NA	NA	NA	NA	NA	NA	NA	NA	NA	NA	NA	NA	NA	NA	NA	NA	NA	NA	NA	0.496779	1	-0.469523	1	-0.371743	1
NAB1	-0.323404	5.27717e-34	NA	NA	NA	NA	NA	NA	NA	NA	NA	NA	NA	NA	NA	NA	NA	NA	NA	NA	NA	NA	NA	NA	NA	NA	NA	NA	NA	NA
FAM49A	-0.322933	1.28574e-49	-0.807593	1.55539e-08	NA	NA	NA	NA	NA	NA	NA	NA	NA	NA	NA	NA	NA	NA	NA	NA	NA	NA	NA	NA	NA	NA	NA	NA	NA	NA
AC100810.1	-0.322743	5.8306e-27	NA	NA	NA	NA	NA	NA	NA	NA	NA	NA	NA	NA	NA	NA	NA	NA	NA	NA	NA	NA	NA	NA	NA	NA	NA	NA	NA	NA
ZNF697	-0.322552	4.86388e-21	NA	NA	NA	NA	NA	NA	NA	NA	NA	NA	NA	NA	NA	NA	NA	NA	NA	NA	NA	NA	NA	NA	NA	NA	NA	NA	NA	NA
JOSD1	-0.321753	5.04263e-35	-0.435194	0.0028363	-0.55065	1	NA	NA	NA	NA	NA	NA	NA	NA	NA	NA	NA	NA	NA	NA	NA	NA	NA	NA	NA	NA	0.340195	1	NA	NA
HS3ST3B1	-0.321713	2.31228e-14	-0.710396	2.64578e-05	NA	NA	NA	NA	NA	NA	NA	NA	NA	NA	NA	NA	NA	NA	NA	NA	NA	NA	NA	NA	NA	NA	NA	NA	NA	NA
DOCK10	-0.321572	6.95075e-41	NA	NA	NA	NA	NA	NA	NA	NA	NA	NA	NA	NA	-0.286872	1	NA	NA	NA	NA	NA	NA	NA	NA	NA	NA	0.998237	1	NA	NA
GEM	-0.321315	8.18625e-07	NA	NA	-0.631777	1	NA	NA	NA	NA	NA	NA	NA	NA	NA	NA	NA	NA	NA	NA	NA	NA	NA	NA	-0.348021	1	NA	NA	NA	NA
EIF3H	-0.321136	3.63349e-49	-0.531538	2.16749e-05	-0.521153	0.0584043	0.405142	1	NA	NA	NA	NA	NA	NA	NA	NA	NA	NA	NA	NA	NA	NA	-0.312328	1	NA	NA	-0.729879	1	NA	NA
AC044849.1	-0.318753	7.71483e-22	-0.278648	0.0604337	-0.30349	1	-0.431743	1	-0.250543	4.78012e-74	-0.296801	9.36106e-21	-0.370418	1.8955e-07	NA	NA	-0.391678	4.02112e-13	-0.311433	7.39783e-05	NA	NA	NA	NA	NA	NA	NA	NA	-0.537487	1
CUTA	-0.317629	7.30739e-40	NA	NA	NA	NA	NA	NA	NA	NA	NA	NA	NA	NA	NA	NA	NA	NA	NA	NA	NA	NA	NA	NA	NA	NA	2.02784	1	-0.355389	1
MAP4K4	-0.316662	4.84094e-45	NA	NA	NA	NA	-0.374234	1	NA	NA	NA	NA	NA	NA	NA	NA	NA	NA	-0.265963	1.19266e-06	NA	NA	NA	NA	0.356888	1	-1.80066	1	NA	NA
RBM3	-0.316391	6.96629e-50	-0.520388	0.00137129	-0.323096	1	NA	NA	NA	NA	NA	NA	NA	NA	NA	NA	NA	NA	NA	NA	NA	NA	NA	NA	NA	NA	0.710363	1	NA	NA
MSC	-0.315855	6.69659e-09	NA	NA	NA	NA	NA	NA	NA	NA	NA	NA	NA	NA	NA	NA	NA	NA	NA	NA	NA	NA	NA	NA	NA	NA	NA	NA	NA	NA
2006-03-01	-0.314433	1.08831e-27	-0.442692	5.1142e-05	-0.253811	1	NA	NA	NA	NA	NA	NA	NA	NA	NA	NA	NA	NA	NA	NA	NA	NA	NA	NA	-0.498901	1	NA	NA	NA	NA
AC091271.1	-0.314035	3.57524e-24	NA	NA	NA	NA	NA	NA	NA	NA	NA	NA	NA	NA	NA	NA	NA	NA	NA	NA	NA	NA	NA	NA	NA	NA	NA	NA	NA	NA
TICAM1	-0.313739	1.84829e-43	-0.377973	0.00168177	NA	NA	NA	NA	NA	NA	NA	NA	NA	NA	NA	NA	NA	NA	NA	NA	NA	NA	NA	NA	NA	NA	NA	NA	NA	NA
EIF4B	-0.313426	3.48105e-36	-0.426007	0.0253098	-0.61339	0.105104	NA	NA	NA	NA	NA	NA	NA	NA	NA	NA	NA	NA	NA	NA	NA	NA	NA	NA	0.313524	1	NA	NA	NA	NA
LPXN	-0.313224	1.31307e-38	NA	NA	NA	NA	NA	NA	NA	NA	NA	NA	NA	NA	-0.394257	1	NA	NA	NA	NA	NA	NA	NA	NA	NA	NA	NA	NA	NA	NA
YBX1	-0.310421	1.63943e-23	-0.580681	9.14794e-09	-0.258627	1	NA	NA	NA	NA	NA	NA	NA	NA	NA	NA	NA	NA	NA	NA	NA	NA	NA	NA	0.505783	1	-0.351207	1	NA	NA
NDRG1	-0.310205	1.44505e-34	NA	NA	NA	NA	-0.320876	1	NA	NA	NA	NA	NA	NA	0.34076	1	NA	NA	NA	NA	NA	NA	0.290345	1	-0.286628	1	NA	NA	0.432762	1
HCAR2	-0.310096	1.30704e-30	NA	NA	NA	NA	NA	NA	NA	NA	NA	NA	NA	NA	NA	NA	NA	NA	NA	NA	NA	NA	NA	NA	NA	NA	NA	NA	NA	NA
KPNA4	-0.310071	8.41372e-48	NA	NA	-0.447112	1	NA	NA	NA	NA	NA	NA	NA	NA	NA	NA	NA	NA	NA	NA	NA	NA	NA	NA	NA	NA	NA	NA	-0.312352	1
HERPUD1	-0.308586	5.72947e-65	-0.510748	0.00103576	-0.679829	1	-0.643259	1	NA	NA	NA	NA	NA	NA	0.413733	1	NA	NA	NA	NA	0.280794	1	NA	NA	0.521822	1	NA	NA	NA	NA
RPL12	-0.30686	7.41104e-29	-0.989241	5.96256e-24	-0.676505	2.76617e-09	NA	NA	NA	NA	NA	NA	NA	NA	NA	NA	NA	NA	NA	NA	NA	NA	NA	NA	NA	NA	NA	NA	NA	NA
RPL23	-0.306644	2.98193e-25	-0.372675	0.0107766	NA	NA	0.250556	1	NA	NA	NA	NA	NA	NA	-0.264791	1	NA	NA	NA	NA	NA	NA	NA	NA	0.261895	1	NA	NA	NA	NA
CXCR4	-0.306497	3.02467e-23	-1.18171	1.32445e-05	-1.40561	1.99334e-05	0.276682	1	-0.388519	8.35907e-179	-0.514381	5.65979e-137	-0.282374	1.9169e-11	-0.331055	1	NA	NA	-0.279275	1.15349e-06	NA	NA	-0.332705	1	NA	NA	-1.77615	1	-0.261106	1
NAP1L1	-0.304485	1.38323e-37	-1.53165	8.84005e-37	-0.806844	0.0460363	NA	NA	NA	NA	NA	NA	NA	NA	NA	NA	NA	NA	NA	NA	NA	NA	NA	NA	-0.268247	1	-1.10099	1	NA	NA
PLEKHF2	-0.304193	2.12284e-38	NA	NA	NA	NA	NA	NA	NA	NA	NA	NA	NA	NA	NA	NA	NA	NA	NA	NA	NA	NA	NA	NA	NA	NA	NA	NA	NA	NA
ATP6V1F	-0.303019	3.83159e-36	0.460717	0.0159389	NA	NA	NA	NA	NA	NA	NA	NA	NA	NA	0.260798	1	NA	NA	0.292871	7.60292e-08	NA	NA	NA	NA	NA	NA	-1.69978	1	NA	NA
POLR2A	-0.302825	2.46634e-31	NA	NA	NA	NA	-0.326192	1	NA	NA	NA	NA	NA	NA	NA	NA	NA	NA	NA	NA	NA	NA	NA	NA	NA	NA	0.824819	1	-0.528546	1
EIF3G	-0.300316	4.10345e-53	NA	NA	-0.44555	1	NA	NA	NA	NA	NA	NA	NA	NA	NA	NA	NA	NA	NA	NA	NA	NA	-0.253279	1	-0.257636	1	0.526561	1	-0.598662	1
HLA-E	-0.299692	7.08418e-24	-0.76412	7.83085e-15	NA	NA	NA	NA	NA	NA	-0.301377	1.35169e-79	NA	NA	-0.283674	1	NA	NA	NA	NA	NA	NA	NA	NA	0.415384	1	-0.332827	1	-0.27009	1
UAP1	-0.298466	4.86705e-18	NA	NA	-0.715787	1	NA	NA	NA	NA	NA	NA	NA	NA	NA	NA	NA	NA	NA	NA	NA	NA	NA	NA	NA	NA	NA	NA	NA	NA
RIPK2	-0.298242	4.19798e-34	-0.671538	0.0222737	0.500357	1	NA	NA	NA	NA	NA	NA	NA	NA	NA	NA	NA	NA	NA	NA	NA	NA	NA	NA	NA	NA	NA	NA	NA	NA
TWISTNB	-0.298209	1.77e-24	NA	NA	NA	NA	0.318418	1	NA	NA	NA	NA	NA	NA	NA	NA	NA	NA	NA	NA	NA	NA	NA	NA	NA	NA	NA	NA	NA	NA
HLA-C	-0.298207	4.71968e-20	-0.423	0.399815	-0.354526	1	NA	NA	-0.420882	0	-0.506857	3.56597e-194	-0.35579	1.01552e-49	NA	NA	-0.272994	2.52881e-57	-0.303482	3.02996e-25	NA	NA	-0.399182	0.0491364	0.37768	1	-1.38259	1	-0.735239	1.75944e-08
ANXA5	-0.296352	8.34051e-09	0.625673	9.0338e-09	NA	NA	-0.372201	1	NA	NA	NA	NA	NA	NA	NA	NA	NA	NA	NA	NA	NA	NA	NA	NA	NA	NA	NA	NA	NA	NA
AC093673.1	-0.295837	7.64889e-26	NA	NA	NA	NA	NA	NA	NA	NA	NA	NA	NA	NA	NA	NA	NA	NA	NA	NA	NA	NA	NA	NA	NA	NA	-0.763407	1	NA	NA
UBTD2	-0.295369	3.61527e-22	NA	NA	NA	NA	NA	NA	NA	NA	NA	NA	NA	NA	NA	NA	NA	NA	NA	NA	NA	NA	NA	NA	NA	NA	NA	NA	NA	NA
BHLHE40	-0.295347	5.89809e-20	0.744865	9.69993e-07	-0.552928	1	-0.260255	1	NA	NA	-0.315791	7.26398e-20	NA	NA	NA	NA	0.354528	4.71645e-14	NA	NA	NA	NA	0.854691	1.91999e-07	NA	NA	NA	NA	-0.511344	1
HIVEP3	-0.29525	2.20448e-32	NA	NA	NA	NA	NA	NA	NA	NA	NA	NA	NA	NA	NA	NA	NA	NA	NA	NA	NA	NA	NA	NA	NA	NA	NA	NA	NA	NA
RPLP0	-0.294457	6.41342e-19	-0.954434	5.81781e-12	-0.552082	0.00151496	NA	NA	NA	NA	NA	NA	NA	NA	0.425248	0.243146	NA	NA	NA	NA	NA	NA	NA	NA	NA	NA	0.976684	1	NA	NA
NFATC1	-0.2942	6.37698e-23	-0.534581	0.00250637	-0.324882	1	NA	NA	NA	NA	NA	NA	NA	NA	NA	NA	NA	NA	NA	NA	NA	NA	NA	NA	-0.25669	1	1.05588	1	NA	NA
EPB41L4A-AS1	-0.293844	5.30059e-25	-0.369555	3.32452e-05	-0.268892	1	-0.564158	0.485073	NA	NA	NA	NA	NA	NA	0.418542	1	NA	NA	NA	NA	NA	NA	NA	NA	-0.528458	1	NA	NA	NA	NA
AC004687.1	-0.293751	1.20253e-20	-0.35897	0.000429382	-0.472017	1	-0.602201	0.0103024	NA	NA	NA	NA	NA	NA	NA	NA	-0.311215	4.69507e-10	NA	NA	NA	NA	NA	NA	NA	NA	NA	NA	NA	NA
IL18	-0.292739	1.47373e-13	-0.372907	1	-0.699733	0.782408	NA	NA	NA	NA	NA	NA	NA	NA	NA	NA	NA	NA	NA	NA	NA	NA	NA	NA	-0.471048	1	NA	NA	NA	NA
ARID5A	-0.292276	2.31589e-21	NA	NA	-0.264966	1	NA	NA	0.332547	7.43698e-130	0.260027	4.01752e-51	NA	NA	NA	NA	NA	NA	NA	NA	NA	NA	NA	NA	0.818304	1	2.73098	1	0.571517	0.0226845
COX4I1	-0.291783	4.50013e-17	-0.253204	1	NA	NA	NA	NA	NA	NA	NA	NA	NA	NA	NA	NA	NA	NA	NA	NA	NA	NA	NA	NA	NA	NA	0.620433	1	-0.261252	1
LIPN	-0.29149	5.3464e-15	NA	NA	NA	NA	NA	NA	NA	NA	NA	NA	NA	NA	NA	NA	NA	NA	NA	NA	NA	NA	NA	NA	NA	NA	NA	NA	NA	NA
ILF3-DT	-0.29111	2.76128e-25	-0.359396	0.000429382	-0.262131	1	NA	NA	NA	NA	NA	NA	NA	NA	NA	NA	NA	NA	NA	NA	NA	NA	NA	NA	NA	NA	NA	NA	NA	NA
IQSEC1	-0.289164	1.84387e-46	NA	NA	NA	NA	NA	NA	NA	NA	NA	NA	NA	NA	NA	NA	NA	NA	NA	NA	NA	NA	NA	NA	NA	NA	1.9112	1	NA	NA
NRIP1	-0.288246	1.1743e-37	0.366691	1	0.608922	1	NA	NA	NA	NA	NA	NA	NA	NA	NA	NA	NA	NA	NA	NA	NA	NA	NA	NA	-0.576808	1	NA	NA	NA	NA
RPS9	-0.288068	4.52804e-29	NA	NA	-0.511667	1.9297e-06	NA	NA	NA	NA	NA	NA	NA	NA	NA	NA	NA	NA	NA	NA	-0.258072	0.022838	NA	NA	NA	NA	0.580988	1	-0.26792	1
IDS	-0.287061	1.72268e-40	-0.699528	0.00135721	-0.696189	1	-0.620541	1	NA	NA	-0.274873	1.59171e-29	NA	NA	NA	NA	NA	NA	-0.504954	3.43414e-17	NA	NA	NA	NA	-0.476193	1	NA	NA	-0.896213	0.00405759
CYB561A3	-0.286647	1.91957e-28	NA	NA	NA	NA	NA	NA	NA	NA	NA	NA	NA	NA	NA	NA	NA	NA	NA	NA	NA	NA	NA	NA	NA	NA	NA	NA	NA	NA
MX1	-0.286586	1.3777e-14	NA	NA	-0.260948	1	-1.01854	0.857541	NA	NA	NA	NA	NA	NA	NA	NA	NA	NA	NA	NA	NA	NA	-0.413938	1	NA	NA	NA	NA	0.318474	1
GNA13	-0.286419	5.73678e-43	NA	NA	-0.768479	1	NA	NA	NA	NA	NA	NA	NA	NA	NA	NA	0.310155	6.28292e-22	NA	NA	NA	NA	NA	NA	0.354963	1	1.63852	1	NA	NA
MOAP1	-0.286419	2.28417e-31	NA	NA	NA	NA	NA	NA	NA	NA	NA	NA	NA	NA	NA	NA	NA	NA	NA	NA	NA	NA	NA	NA	NA	NA	NA	NA	NA	NA
UPP1	-0.286255	2.38455e-37	0.435748	1	NA	NA	0.535948	1	NA	NA	NA	NA	NA	NA	NA	NA	0.303245	2.5806e-20	NA	NA	NA	NA	0.778884	4.19077e-06	0.428242	1	0.458586	1	0.374777	1
IRF8	-0.286184	1.02334e-32	NA	NA	-0.449535	1	NA	NA	NA	NA	NA	NA	NA	NA	NA	NA	0.252585	1.25594e-23	NA	NA	NA	NA	NA	NA	NA	NA	NA	NA	NA	NA
NPM1	-0.28617	1.44933e-29	-0.795665	4.76406e-07	-0.361308	1	NA	NA	NA	NA	NA	NA	NA	NA	NA	NA	NA	NA	NA	NA	NA	NA	NA	NA	NA	NA	2.48393	1	NA	NA
LINC00937	-0.285871	1.10196e-21	NA	NA	NA	NA	NA	NA	NA	NA	NA	NA	NA	NA	NA	NA	NA	NA	NA	NA	NA	NA	NA	NA	NA	NA	NA	NA	NA	NA
TAF9	-0.285676	1.97052e-21	NA	NA	NA	NA	NA	NA	NA	NA	NA	NA	NA	NA	NA	NA	NA	NA	NA	NA	NA	NA	NA	NA	NA	NA	NA	NA	NA	NA
HIF1A	-0.285292	8.86463e-20	NA	NA	1.11895	3.3179e-06	NA	NA	0.34327	1.08856e-111	0.261974	1.15648e-56	0.338288	1.4935e-20	NA	NA	0.498578	5.40527e-43	0.346159	2.5523e-08	NA	NA	0.285039	1	NA	NA	2.25679	1	0.379108	1
EPB41L3	-0.284835	1.8278e-33	NA	NA	NA	NA	NA	NA	NA	NA	NA	NA	NA	NA	NA	NA	NA	NA	NA	NA	NA	NA	NA	NA	NA	NA	NA	NA	NA	NA
RAB5A	-0.284831	3.0907e-47	NA	NA	NA	NA	NA	NA	NA	NA	NA	NA	NA	NA	NA	NA	NA	NA	NA	NA	NA	NA	NA	NA	NA	NA	1.05578	1	0.405485	1
PELI1	-0.284795	7.68825e-26	-1.04553	0.000738358	NA	NA	NA	NA	NA	NA	NA	NA	NA	NA	NA	NA	NA	NA	0.339595	2.63691e-14	NA	NA	NA	NA	0.260122	1	0.622453	1	NA	NA
DNAJC4	-0.28181	1.55377e-22	NA	NA	-0.421141	1	-0.305455	1	NA	NA	NA	NA	NA	NA	NA	NA	NA	NA	NA	NA	NA	NA	NA	NA	-0.560247	1	-1.89407	1	NA	NA
CPEB2	-0.281709	3.48535e-23	NA	NA	NA	NA	NA	NA	NA	NA	NA	NA	NA	NA	NA	NA	NA	NA	NA	NA	NA	NA	NA	NA	NA	NA	NA	NA	NA	NA
C9orf16	-0.281682	3.3151e-55	-0.364552	1	-0.428335	1	NA	NA	NA	NA	NA	NA	NA	NA	NA	NA	NA	NA	NA	NA	NA	NA	NA	NA	NA	NA	-2.31791	1	NA	NA
JUND	-0.281154	3.50981e-14	-0.731418	7.76911e-15	-0.940402	1.24591e-09	-0.485346	1	NA	NA	NA	NA	NA	NA	NA	NA	NA	NA	-0.358995	1.63688e-25	NA	NA	NA	NA	NA	NA	NA	NA	-0.314086	1
P2RX4	-0.280875	4.33491e-28	NA	NA	0.384054	0.0149765	NA	NA	NA	NA	NA	NA	NA	NA	NA	NA	NA	NA	NA	NA	NA	NA	NA	NA	NA	NA	NA	NA	NA	NA
IL1R1	-0.280602	6.5291e-25	NA	NA	NA	NA	NA	NA	NA	NA	NA	NA	NA	NA	NA	NA	NA	NA	NA	NA	NA	NA	NA	NA	NA	NA	NA	NA	NA	NA
RBKS	-0.278605	1.51654e-07	NA	NA	NA	NA	NA	NA	NA	NA	NA	NA	NA	NA	NA	NA	NA	NA	NA	NA	NA	NA	NA	NA	NA	NA	NA	NA	NA	NA
YME1L1	-0.277898	4.2919e-52	-0.30714	1	NA	NA	NA	NA	NA	NA	NA	NA	NA	NA	-0.280573	1	NA	NA	NA	NA	NA	NA	NA	NA	NA	NA	NA	NA	-0.273523	1
HSPA6	-0.277283	3.72901e-06	NA	NA	NA	NA	NA	NA	NA	NA	NA	NA	NA	NA	NA	NA	NA	NA	NA	NA	NA	NA	NA	NA	NA	NA	NA	NA	NA	NA
RAPGEF1	-0.276998	2.3043e-43	-0.276554	8.40362e-07	-0.548198	1	NA	NA	NA	NA	NA	NA	NA	NA	NA	NA	NA	NA	NA	NA	NA	NA	0.288241	1	0.251197	1	NA	NA	NA	NA
RPS4X	-0.276612	5.49883e-24	-1.01061	3.48531e-16	-0.539925	6.1238e-05	NA	NA	NA	NA	NA	NA	NA	NA	NA	NA	NA	NA	NA	NA	NA	NA	NA	NA	NA	NA	0.592033	1	-0.285541	1
FNIP1	-0.276075	1.62636e-36	NA	NA	NA	NA	NA	NA	NA	NA	NA	NA	NA	NA	NA	NA	NA	NA	NA	NA	NA	NA	0.286142	1	NA	NA	NA	NA	NA	NA
HSPH1	-0.276032	8.83588e-06	-0.397445	1	NA	NA	NA	NA	NA	NA	NA	NA	NA	NA	NA	NA	NA	NA	NA	NA	NA	NA	NA	NA	0.519271	1	NA	NA	0.337422	1
ASNA1	-0.275999	1.88629e-24	-0.318765	0.0334136	NA	NA	-0.506532	0.485073	NA	NA	NA	NA	NA	NA	NA	NA	NA	NA	NA	NA	NA	NA	-0.268059	1	NA	NA	NA	NA	NA	NA
HOMER3	-0.275069	3.59587e-26	NA	NA	NA	NA	NA	NA	NA	NA	NA	NA	NA	NA	NA	NA	NA	NA	NA	NA	NA	NA	NA	NA	NA	NA	NA	NA	NA	NA
ARHGAP31	-0.27496	2.92134e-16	NA	NA	NA	NA	NA	NA	NA	NA	NA	NA	NA	NA	NA	NA	NA	NA	NA	NA	NA	NA	NA	NA	NA	NA	NA	NA	NA	NA
ISG20	-0.273784	0.000383336	-0.742304	0.00018141	-0.82849	1	0.308921	1	NA	NA	NA	NA	0.406987	4.12181e-20	0.756922	2.91724e-08	0.557769	1.23097e-39	0.480884	1.09055e-22	NA	NA	NA	NA	0.422348	1	NA	NA	0.264287	1
ZBTB10	-0.27363	9.19342e-09	NA	NA	NA	NA	0.355016	1	NA	NA	NA	NA	NA	NA	-0.312786	1	NA	NA	NA	NA	NA	NA	NA	NA	0.666921	1	-1.4289	1	-0.286574	1
IL3RA	-0.271622	1.4619e-11	-0.356635	1	NA	NA	NA	NA	NA	NA	NA	NA	NA	NA	NA	NA	NA	NA	NA	NA	NA	NA	NA	NA	-0.320646	1	NA	NA	NA	NA
SOCS1	-0.271577	0.0567426	NA	NA	NA	NA	NA	NA	NA	NA	NA	NA	NA	NA	NA	NA	NA	NA	NA	NA	NA	NA	NA	NA	NA	NA	NA	NA	NA	NA
SRSF2	-0.270588	1.53882e-38	NA	NA	-0.65786	0.0117235	NA	NA	NA	NA	-0.284388	6.28681e-47	NA	NA	-0.539986	0.140443	-0.401986	2.87226e-30	NA	NA	NA	NA	NA	NA	NA	NA	0.870913	1	NA	NA
DPEP2	-0.270359	1.45146e-05	-0.392048	0.977337	NA	NA	NA	NA	NA	NA	NA	NA	NA	NA	NA	NA	NA	NA	NA	NA	NA	NA	NA	NA	NA	NA	NA	NA	NA	NA
FNIP2	-0.269602	5.53409e-32	NA	NA	NA	NA	NA	NA	NA	NA	NA	NA	NA	NA	NA	NA	NA	NA	NA	NA	NA	NA	NA	NA	NA	NA	NA	NA	NA	NA
JUN	-0.269215	1.55523e-13	-0.283779	1	-0.397212	1	NA	NA	NA	NA	-0.288284	7.94145e-20	-0.409321	1.79878e-16	NA	NA	NA	NA	-0.295141	0.0110134	-0.285261	1	NA	NA	NA	NA	0.376468	1	-0.544965	1
FXYD5	-0.269194	1.36219e-48	-0.455581	0.000200704	-0.370504	1	NA	NA	NA	NA	NA	NA	NA	NA	0.274449	1	NA	NA	-0.531329	8.0923e-28	NA	NA	NA	NA	-0.639272	1	-2.75921	1	0.276122	1
SLC7A7	-0.267943	3.45766e-49	NA	NA	0.456238	1	NA	NA	NA	NA	NA	NA	NA	NA	NA	NA	NA	NA	NA	NA	NA	NA	NA	NA	NA	NA	NA	NA	NA	NA
TMEM14C	-0.265877	3.47193e-23	NA	NA	-0.770187	0.00520385	NA	NA	NA	NA	NA	NA	NA	NA	NA	NA	NA	NA	NA	NA	NA	NA	NA	NA	-0.43393	1	NA	NA	NA	NA
KBTBD2	-0.265301	6.49365e-38	NA	NA	NA	NA	NA	NA	NA	NA	NA	NA	NA	NA	NA	NA	NA	NA	NA	NA	NA	NA	NA	NA	NA	NA	1.73572	1	NA	NA
TXNDC12	-0.264505	1.20081e-11	-0.318253	1	NA	NA	-0.386237	1	NA	NA	NA	NA	NA	NA	NA	NA	NA	NA	NA	NA	NA	NA	NA	NA	NA	NA	NA	NA	NA	NA
HIGD2A	-0.263109	2.9508e-49	-0.451064	3.64431e-05	-0.290156	1	NA	NA	NA	NA	NA	NA	NA	NA	NA	NA	NA	NA	NA	NA	NA	NA	NA	NA	NA	NA	NA	NA	NA	NA
SNN	-0.262997	5.04552e-33	NA	NA	NA	NA	NA	NA	NA	NA	NA	NA	NA	NA	NA	NA	NA	NA	NA	NA	NA	NA	NA	NA	NA	NA	-1.4135	1	NA	NA
NAB2	-0.26253	1.75648e-11	NA	NA	-0.284694	1	NA	NA	NA	NA	NA	NA	NA	NA	NA	NA	NA	NA	NA	NA	NA	NA	NA	NA	NA	NA	NA	NA	NA	NA
TMEM123	-0.261626	1.12446e-43	NA	NA	NA	NA	NA	NA	NA	NA	NA	NA	NA	NA	-0.291032	1	NA	NA	NA	NA	NA	NA	NA	NA	0.838646	1	1.81586	1	NA	NA
LAMB3	-0.260892	2.44146e-14	NA	NA	NA	NA	NA	NA	NA	NA	NA	NA	NA	NA	NA	NA	NA	NA	NA	NA	NA	NA	NA	NA	NA	NA	NA	NA	NA	NA
RARA	-0.259644	3.69634e-42	NA	NA	-0.345034	1	-0.25175	1	NA	NA	NA	NA	NA	NA	NA	NA	NA	NA	NA	NA	NA	NA	NA	NA	-0.264849	1	NA	NA	NA	NA
PEA15	-0.258586	5.28162e-35	0.265791	2.64677e-05	-0.382075	1	NA	NA	NA	NA	NA	NA	NA	NA	NA	NA	NA	NA	NA	NA	NA	NA	NA	NA	NA	NA	NA	NA	NA	NA
ADRA2B	-0.25833	4.45585e-14	NA	NA	NA	NA	NA	NA	NA	NA	NA	NA	NA	NA	NA	NA	NA	NA	NA	NA	NA	NA	NA	NA	NA	NA	NA	NA	NA	NA
IL23A	-0.258271	1	NA	NA	NA	NA	0.451062	1	NA	NA	NA	NA	NA	NA	NA	NA	NA	NA	NA	NA	NA	NA	NA	NA	0.530862	1	NA	NA	NA	NA
TOMM20	-0.257875	1.49284e-43	-0.280323	0.0898992	NA	NA	-0.380145	1	NA	NA	NA	NA	NA	NA	NA	NA	NA	NA	NA	NA	NA	NA	NA	NA	NA	NA	NA	NA	NA	NA
UBE2S	-0.257589	6.47418e-25	-0.333318	0.00414844	-0.370462	1	-0.426505	1	NA	NA	-0.333584	2.61061e-52	-0.365795	9.44152e-17	NA	NA	-0.380312	5.48072e-21	NA	NA	NA	NA	NA	NA	NA	NA	NA	NA	-0.686071	1
ALKBH7	-0.257519	5.63166e-45	-0.348653	0.0770158	-0.31098	1	NA	NA	NA	NA	NA	NA	NA	NA	0.281641	1	NA	NA	NA	NA	NA	NA	NA	NA	NA	NA	-0.830893	1	NA	NA
MN1	-0.255883	7.71451e-12	NA	NA	NA	NA	NA	NA	NA	NA	NA	NA	NA	NA	NA	NA	NA	NA	NA	NA	NA	NA	NA	NA	NA	NA	NA	NA	NA	NA
ECE1	-0.255679	1.2295e-39	0.489396	4.23552e-06	NA	NA	NA	NA	NA	NA	NA	NA	NA	NA	NA	NA	NA	NA	NA	NA	NA	NA	NA	NA	NA	NA	0.565656	1	NA	NA
NPC2	-0.255377	1.11408e-19	NA	NA	0.524842	1	-0.402028	1	NA	NA	NA	NA	NA	NA	NA	NA	NA	NA	NA	NA	NA	NA	0.269125	1	-0.469219	1	-1.88316	1	NA	NA
NUTM2B-AS1	-0.255093	1.06483e-22	-0.308774	0.0178897	-0.320084	1	-0.935692	0.00183043	NA	NA	NA	NA	NA	NA	NA	NA	NA	NA	-0.31468	1.59612e-07	NA	NA	NA	NA	-0.685918	1	NA	NA	NA	NA
TUBA4A	-0.253925	5.72916e-18	-0.597761	0.00656919	-0.554256	1	NA	NA	-0.349752	1.41055e-79	-0.522464	1.02423e-64	NA	NA	NA	NA	-0.44353	5.38855e-28	-0.271079	1.32985e-05	NA	NA	NA	NA	0.608878	1	-3.58292	1	-0.517495	1
PSAP	-0.253831	0.165558	0.45749	0.0253216	0.623776	0.249658	NA	NA	NA	NA	NA	NA	NA	NA	NA	NA	NA	NA	NA	NA	NA	NA	0.340804	1	-0.25019	1	-0.404867	1	NA	NA
ETF1	-0.253023	5.15911e-42	NA	NA	-0.271142	1	-0.357839	1	NA	NA	NA	NA	NA	NA	NA	NA	NA	NA	NA	NA	NA	NA	NA	NA	NA	NA	0.622453	1	0.277735	1
HCST	-0.252878	2.11981e-37	NA	NA	0.31727	1	NA	NA	NA	NA	NA	NA	NA	NA	NA	NA	NA	NA	NA	NA	NA	NA	0.352187	1	NA	NA	0.303172	1	-0.358512	1
PRNP	-0.252197	2.3995e-41	NA	NA	NA	NA	-0.280667	1	NA	NA	NA	NA	NA	NA	NA	NA	0.292691	1.8652e-31	NA	NA	NA	NA	NA	NA	NA	NA	NA	NA	NA	NA
RNASE6	-0.25213	1.2378e-27	NA	NA	-0.457371	1	NA	NA	NA	NA	NA	NA	NA	NA	NA	NA	NA	NA	NA	NA	-0.38914	0.739345	NA	NA	NA	NA	NA	NA	NA	NA
RABGEF1	-0.251267	1.15641e-32	NA	NA	NA	NA	NA	NA	NA	NA	NA	NA	NA	NA	NA	NA	NA	NA	NA	NA	NA	NA	NA	NA	NA	NA	NA	NA	NA	NA
IRF2BP2	-0.251053	2.95295e-28	0.266293	1	-0.501756	1	NA	NA	-0.285772	5.85381e-112	-0.268338	3.55743e-68	NA	NA	-0.274364	1	NA	NA	NA	NA	NA	NA	-0.311483	1	NA	NA	1.37855	1	NA	NA
RALGDS	-0.250849	1.69477e-37	NA	NA	NA	NA	NA	NA	NA	NA	NA	NA	NA	NA	NA	NA	NA	NA	NA	NA	NA	NA	NA	NA	-0.486359	1	NA	NA	NA	NA
PGGT1B	0.250137	2.54996e-50	NA	NA	NA	NA	-0.374795	1	NA	NA	NA	NA	NA	NA	NA	NA	NA	NA	NA	NA	NA	NA	NA	NA	NA	NA	2.50104	1	0.371016	1
ATP5PF	0.250834	2.81083e-40	NA	NA	0.309059	1	NA	NA	NA	NA	NA	NA	NA	NA	NA	NA	NA	NA	NA	NA	NA	NA	NA	NA	-0.283085	1	-0.367926	1	NA	NA
ROCK1	0.25272	4.59742e-41	NA	NA	NA	NA	NA	NA	NA	NA	NA	NA	NA	NA	-0.337797	1	NA	NA	NA	NA	NA	NA	NA	NA	NA	NA	0.87063	1	0.35654	1
TAOK1	0.254769	2.54568e-53	NA	NA	NA	NA	NA	NA	NA	NA	NA	NA	NA	NA	-0.257691	1	NA	NA	NA	NA	NA	NA	NA	NA	NA	NA	NA	NA	NA	NA
MZT2A	0.25589	5.51141e-59	NA	NA	NA	NA	-0.259001	1	NA	NA	NA	NA	NA	NA	NA	NA	NA	NA	NA	NA	NA	NA	NA	NA	-0.424684	1	0.929535	1	NA	NA
GLYR1	0.256259	9.33946e-62	0.293393	0.0147131	0.334846	1	NA	NA	NA	NA	NA	NA	NA	NA	NA	NA	NA	NA	NA	NA	NA	NA	NA	NA	NA	NA	-0.490221	1	NA	NA
SAR1A	0.256576	5.73982e-49	NA	NA	0.297835	1	NA	NA	NA	NA	NA	NA	NA	NA	NA	NA	NA	NA	NA	NA	0.252023	1	NA	NA	NA	NA	-1.09794	1	NA	NA
NPTN	0.256784	1.70687e-75	0.37367	0.00524694	0.452824	1	NA	NA	NA	NA	NA	NA	NA	NA	NA	NA	NA	NA	NA	NA	NA	NA	NA	NA	NA	NA	-0.641737	1	NA	NA
CPPED1	0.257203	2.14271e-56	0.29818	1	0.301286	1	NA	NA	NA	NA	NA	NA	NA	NA	NA	NA	NA	NA	NA	NA	NA	NA	NA	NA	-0.366985	1	NA	NA	NA	NA
NDUFA2	0.258224	7.28426e-48	NA	NA	0.335333	1	NA	NA	NA	NA	NA	NA	NA	NA	NA	NA	NA	NA	NA	NA	NA	NA	NA	NA	NA	NA	-1.23558	1	NA	NA
CTBP2	0.258703	9.80989e-44	NA	NA	NA	NA	NA	NA	NA	NA	NA	NA	NA	NA	NA	NA	NA	NA	NA	NA	NA	NA	NA	NA	-0.255715	1	NA	NA	NA	NA
ARPC2	0.258875	3.70552e-13	NA	NA	NA	NA	-0.321193	1	NA	NA	-0.314629	1.342e-43	NA	NA	-0.400984	1	NA	NA	NA	NA	NA	NA	-0.253087	1	NA	NA	0.589592	1	NA	NA
SRSF10	0.259299	1.51786e-47	NA	NA	NA	NA	NA	NA	0.345216	4.02961e-119	NA	NA	NA	NA	NA	NA	0.299336	3.24856e-21	0.287753	7.82883e-05	NA	NA	0.364458	1	NA	NA	NA	NA	0.838575	5.58475e-05
KIDINS220	0.259782	2.22123e-64	0.291057	6.63825e-08	0.3244	1	NA	NA	NA	NA	NA	NA	NA	NA	NA	NA	NA	NA	NA	NA	NA	NA	NA	NA	-0.341812	1	-0.876715	1	0.338623	1
ZNF791	0.260045	2.0528e-37	NA	NA	-0.517247	1	-0.398916	1	NA	NA	NA	NA	NA	NA	NA	NA	NA	NA	-0.273307	0.00277364	0.27096	1	NA	NA	-0.398397	1	1.43548	1	NA	NA
NDUFA12	0.260249	1.45141e-55	NA	NA	0.369805	1	NA	NA	NA	NA	NA	NA	NA	NA	NA	NA	NA	NA	NA	NA	NA	NA	-0.372263	1	NA	NA	1.52305	1	NA	NA
SASH3	0.261221	1.37024e-54	0.264082	0.000296939	NA	NA	NA	NA	NA	NA	NA	NA	NA	NA	NA	NA	NA	NA	NA	NA	NA	NA	NA	NA	-0.723429	1	1.21965	1	NA	NA
CD164	0.262292	4.62986e-48	NA	NA	0.327207	1	NA	NA	NA	NA	NA	NA	NA	NA	-0.272649	1	NA	NA	NA	NA	NA	NA	NA	NA	-0.261103	1	-1.75866	1	-0.390625	1
MACF1	0.263309	5.87872e-53	NA	NA	0.278033	1	NA	NA	NA	NA	NA	NA	NA	NA	-0.322102	1	NA	NA	NA	NA	NA	NA	NA	NA	-0.851711	1	NA	NA	-0.3473	1
MT-ND2	0.263478	3.88871e-13	NA	NA	0.605146	1	0.332709	1	0.525806	0	0.399711	2.56815e-81	0.402168	1.31729e-25	-0.816731	1.59664e-06	0.429266	1.59624e-20	0.390752	4.01929e-14	NA	NA	0.649803	0.0380036	NA	NA	0.379345	1	0.704072	3.33107e-15
PFN1	0.263748	2.69688e-14	NA	NA	NA	NA	NA	NA	NA	NA	-0.308338	5.05509e-33	NA	NA	NA	NA	NA	NA	NA	NA	NA	NA	NA	NA	0.401382	1	-3.50006	1	-0.303594	1
JDP2	0.263864	4.28458e-61	NA	NA	NA	NA	NA	NA	NA	NA	NA	NA	NA	NA	NA	NA	NA	NA	NA	NA	NA	NA	NA	NA	-0.261358	1	NA	NA	NA	NA
AGPAT4	0.26472	2.81549e-51	0.269472	0.417219	NA	NA	NA	NA	NA	NA	NA	NA	NA	NA	NA	NA	NA	NA	NA	NA	NA	NA	NA	NA	-0.353913	1	NA	NA	NA	NA
FXR1	0.264758	1.69785e-51	NA	NA	NA	NA	NA	NA	NA	NA	NA	NA	NA	NA	NA	NA	0.298989	9.14181e-24	NA	NA	NA	NA	NA	NA	-0.382355	1	1.82709	1	0.39749	1
TRIM56	0.265253	1.70932e-51	0.296925	0.0968727	0.312197	1	0.318458	1	NA	NA	NA	NA	NA	NA	-0.306305	1	NA	NA	NA	NA	NA	NA	NA	NA	NA	NA	2.04907	1	0.485257	1
SLK	0.266141	2.10696e-50	NA	NA	0.531417	1	-0.417673	1	NA	NA	NA	NA	NA	NA	NA	NA	NA	NA	NA	NA	NA	NA	NA	NA	NA	NA	NA	NA	NA	NA
NDUFAF8	0.266407	2.94501e-64	NA	NA	0.411388	1	NA	NA	NA	NA	NA	NA	NA	NA	NA	NA	NA	NA	NA	NA	NA	NA	NA	NA	NA	NA	-1.4038	1	NA	NA
RAB1A	0.266842	2.12199e-40	0.267568	1	0.544629	1	-0.485231	1	NA	NA	NA	NA	NA	NA	NA	NA	NA	NA	NA	NA	NA	NA	NA	NA	NA	NA	-0.911613	1	NA	NA
NUB1	0.267914	4.62889e-52	NA	NA	NA	NA	NA	NA	NA	NA	NA	NA	NA	NA	-0.269624	1	NA	NA	NA	NA	NA	NA	NA	NA	NA	NA	NA	NA	NA	NA
DAD1	0.26819	1.43784e-54	0.512895	0.000461158	0.541242	0.401078	NA	NA	NA	NA	NA	NA	NA	NA	NA	NA	NA	NA	NA	NA	NA	NA	NA	NA	-0.352108	1	-0.29131	1	NA	NA
MT-CO2	0.26901	3.65135e-22	NA	NA	NA	NA	0.377908	1	NA	NA	NA	NA	NA	NA	-0.964696	8.96788e-23	NA	NA	NA	NA	-0.303946	1	NA	NA	NA	NA	0.72444	1	NA	NA
TIMP2	0.269142	4.29255e-48	0.450317	0.00266395	0.563259	0.825223	NA	NA	NA	NA	NA	NA	NA	NA	NA	NA	NA	NA	NA	NA	NA	NA	NA	NA	-0.380032	1	NA	NA	NA	NA
KPNB1	0.269521	2.86956e-42	NA	NA	0.529646	1	NA	NA	NA	NA	NA	NA	NA	NA	NA	NA	NA	NA	NA	NA	NA	NA	NA	NA	-0.538584	1	1.07789	1	NA	NA
ATP2B4	0.269725	9.91845e-54	NA	NA	NA	NA	NA	NA	NA	NA	NA	NA	NA	NA	NA	NA	NA	NA	NA	NA	NA	NA	NA	NA	-0.389441	1	NA	NA	-0.463871	1
LMAN2	0.269865	1.02578e-57	NA	NA	0.516201	1	NA	NA	NA	NA	NA	NA	NA	NA	NA	NA	NA	NA	NA	NA	NA	NA	NA	NA	NA	NA	-0.287548	1	NA	NA
ME2	0.27091	1.36029e-52	NA	NA	0.401525	1	-0.340487	1	NA	NA	NA	NA	NA	NA	NA	NA	NA	NA	NA	NA	NA	NA	NA	NA	NA	NA	NA	NA	NA	NA
ID1	0.270921	8.35531e-23	NA	NA	0.875998	1	-0.671766	1	NA	NA	-0.327104	8.13836e-19	-0.635601	8.54978e-16	NA	NA	NA	NA	NA	NA	NA	NA	NA	NA	-1.3126	1	NA	NA	NA	NA
PER1	0.271107	2.77956e-57	NA	NA	-0.266786	1	0.438426	1	NA	NA	NA	NA	NA	NA	NA	NA	NA	NA	NA	NA	NA	NA	NA	NA	NA	NA	-0.814574	1	NA	NA
EZR	0.272252	1.11548e-33	0.309103	1	-1.43711	9.90529e-11	-0.807954	1	NA	NA	0.397502	4.81551e-45	NA	NA	0.805519	8.82864e-07	NA	NA	-0.25972	2.89061e-05	NA	NA	NA	NA	NA	NA	1.89077	1	NA	NA
OSER1	0.2725	2.87509e-61	-0.268397	1	NA	NA	NA	NA	NA	NA	NA	NA	NA	NA	NA	NA	NA	NA	NA	NA	NA	NA	NA	NA	0.381612	1	-0.918453	1	NA	NA
GIT2	0.273608	5.897e-64	NA	NA	0.324665	1	NA	NA	NA	NA	NA	NA	NA	NA	NA	NA	NA	NA	NA	NA	NA	NA	NA	NA	-0.270774	1	NA	NA	NA	NA
VASP	0.27409	3.63198e-22	NA	NA	NA	NA	NA	NA	NA	NA	NA	NA	NA	NA	NA	NA	NA	NA	NA	NA	NA	NA	NA	NA	NA	NA	-0.718632	1	NA	NA
GLG1	0.275207	6.18012e-53	NA	NA	0.375206	1	NA	NA	NA	NA	NA	NA	NA	NA	-0.442262	1	NA	NA	NA	NA	NA	NA	NA	NA	NA	NA	1.66707	1	NA	NA
YWHAZ	0.275521	4.42444e-18	NA	NA	NA	NA	-0.473058	1	NA	NA	NA	NA	NA	NA	NA	NA	NA	NA	NA	NA	0.329177	0.594619	NA	NA	NA	NA	NA	NA	NA	NA
DNAJB14	0.275966	4.46133e-50	NA	NA	NA	NA	NA	NA	NA	NA	NA	NA	NA	NA	-0.254817	1	NA	NA	NA	NA	NA	NA	NA	NA	NA	NA	NA	NA	NA	NA
SH3KBP1	0.276188	5.13783e-54	NA	NA	NA	NA	NA	NA	NA	NA	-0.264026	5.96324e-38	NA	NA	NA	NA	NA	NA	NA	NA	NA	NA	NA	NA	NA	NA	NA	NA	NA	NA
MT-ND6	0.277	3.69924e-40	0.273293	0.58667	0.363319	1	NA	NA	NA	NA	NA	NA	NA	NA	NA	NA	NA	NA	NA	NA	-0.281538	1	NA	NA	NA	NA	-0.28897	1	0.265723	1
CCPG1	0.277199	1.14201e-56	NA	NA	NA	NA	-0.324259	1	NA	NA	-0.257679	2.23515e-39	NA	NA	NA	NA	NA	NA	NA	NA	NA	NA	NA	NA	NA	NA	-1.08312	1	-0.282377	1
CANX	0.277646	1.5516e-21	0.552645	0.00121697	1.24409	5.10849e-10	NA	NA	NA	NA	NA	NA	NA	NA	-0.344013	1	NA	NA	NA	NA	NA	NA	NA	NA	-0.363041	1	NA	NA	NA	NA
ACAA2	0.278681	8.45651e-57	NA	NA	0.388554	0.900033	NA	NA	NA	NA	NA	NA	NA	NA	NA	NA	NA	NA	NA	NA	NA	NA	NA	NA	-0.28607	1	NA	NA	NA	NA
FAM89B	0.278926	2.1644e-54	0.290436	1	NA	NA	-0.502952	1	NA	NA	NA	NA	NA	NA	-0.332097	1	NA	NA	NA	NA	NA	NA	NA	NA	NA	NA	-0.597792	1	NA	NA
MRPL28	0.278939	2.71215e-72	0.392897	4.22416e-08	NA	NA	NA	NA	NA	NA	NA	NA	NA	NA	NA	NA	NA	NA	NA	NA	NA	NA	-0.324544	1	NA	NA	NA	NA	NA	NA
ARRDC3	0.278968	3.2613e-45	NA	NA	NA	NA	NA	NA	NA	NA	NA	NA	NA	NA	NA	NA	NA	NA	NA	NA	NA	NA	NA	NA	-0.383328	1	0.474619	1	NA	NA
FAM110A	0.279759	8.00894e-63	NA	NA	NA	NA	NA	NA	NA	NA	NA	NA	NA	NA	NA	NA	NA	NA	NA	NA	NA	NA	NA	NA	NA	NA	-0.287548	1	NA	NA
CDK2AP1	0.279793	5.14443e-60	NA	NA	NA	NA	NA	NA	NA	NA	NA	NA	NA	NA	NA	NA	NA	NA	NA	NA	NA	NA	NA	NA	NA	NA	-2.49774	1	NA	NA
GGNBP2	0.279849	2.10073e-58	NA	NA	NA	NA	-0.287819	1	NA	NA	NA	NA	NA	NA	NA	NA	NA	NA	NA	NA	NA	NA	NA	NA	NA	NA	0.976652	1	0.273733	1
RNF7	0.280071	2.94978e-56	NA	NA	0.384457	1	-0.364871	1	NA	NA	NA	NA	NA	NA	NA	NA	NA	NA	NA	NA	NA	NA	NA	NA	NA	NA	NA	NA	NA	NA
RAC2	0.280081	9.78678e-42	NA	NA	NA	NA	NA	NA	NA	NA	NA	NA	NA	NA	-0.307836	1	NA	NA	NA	NA	NA	NA	NA	NA	-0.377087	1	-0.272117	1	-0.361572	1
EWSR1	0.28025	2.51031e-41	0.292577	1	0.381581	1	NA	NA	NA	NA	NA	NA	NA	NA	NA	NA	0.283268	1.45447e-16	NA	NA	NA	NA	NA	NA	-0.520442	1	1.3853	1	NA	NA
ADSS2	0.280495	8.60051e-53	0.444154	5.49673e-05	NA	NA	0.549351	1	NA	NA	NA	NA	NA	NA	-0.315547	1	NA	NA	NA	NA	NA	NA	NA	NA	NA	NA	1.05588	1	0.343611	1
WBP4	0.280651	2.301e-54	NA	NA	NA	NA	NA	NA	NA	NA	NA	NA	NA	NA	NA	NA	NA	NA	NA	NA	NA	NA	NA	NA	-0.279982	1	NA	NA	NA	NA
MFF	0.280755	1.09074e-65	NA	NA	0.374736	1	-0.267795	1	NA	NA	NA	NA	NA	NA	NA	NA	NA	NA	NA	NA	NA	NA	NA	NA	NA	NA	0.40521	1	NA	NA
FLOT1	0.281172	5.55111e-60	0.789137	1.7475e-11	0.497996	0.949614	NA	NA	NA	NA	NA	NA	NA	NA	NA	NA	NA	NA	NA	NA	NA	NA	0.350955	7.20706e-05	NA	NA	-1.02872	1	NA	NA
IRF9	0.281961	2.31632e-42	NA	NA	NA	NA	NA	NA	NA	NA	NA	NA	NA	NA	-0.505518	1	NA	NA	NA	NA	NA	NA	NA	NA	NA	NA	2.30636	1	0.294274	1
TRIP12	0.282322	6.24964e-59	0.352281	0.00125957	0.336894	1	NA	NA	NA	NA	NA	NA	NA	NA	NA	NA	NA	NA	NA	NA	NA	NA	NA	NA	NA	NA	-1.78006	1	NA	NA
EP300	0.282355	1.2783e-51	NA	NA	NA	NA	-0.356363	1	NA	NA	NA	NA	NA	NA	NA	NA	NA	NA	NA	NA	NA	NA	NA	NA	NA	NA	1.11452	1	NA	NA
XIAP	0.282874	1.57318e-57	NA	NA	0.378235	1	-0.301072	1	NA	NA	NA	NA	NA	NA	NA	NA	NA	NA	NA	NA	NA	NA	NA	NA	NA	NA	1.11452	1	NA	NA
YIPF4	0.282926	2.94732e-61	NA	NA	0.367961	1	NA	NA	NA	NA	NA	NA	NA	NA	-0.304902	1	NA	NA	NA	NA	NA	NA	NA	NA	NA	NA	2.04907	1	0.293753	1
VMP1	0.284578	2.52263e-33	0.315136	1	NA	NA	NA	NA	NA	NA	NA	NA	0.278844	3.65339e-09	NA	NA	0.289511	3.64388e-09	NA	NA	NA	NA	NA	NA	-0.916388	1	-0.729879	1	NA	NA
ATP5F1A	0.285041	2.63557e-36	NA	NA	NA	NA	NA	NA	NA	NA	NA	NA	NA	NA	NA	NA	NA	NA	NA	NA	NA	NA	NA	NA	-0.564864	1	1.21965	1	NA	NA
PTBP3	0.285069	2.35869e-37	NA	NA	0.456578	1	0.473666	1	NA	NA	NA	NA	NA	NA	NA	NA	NA	NA	NA	NA	NA	NA	0.25217	1	-0.331149	1	2.04907	1	NA	NA
HOOK3	0.285342	1.08949e-61	0.270027	7.84951e-05	0.368937	1	NA	NA	NA	NA	NA	NA	NA	NA	NA	NA	NA	NA	NA	NA	NA	NA	NA	NA	-0.269782	1	NA	NA	NA	NA
LTB	0.285444	1	NA	NA	0.339004	1	-0.280463	1	-0.403045	1.59142e-233	NA	NA	0.396047	3.8514e-06	-0.573487	1	0.263201	0.00239191	NA	NA	-0.384119	1	NA	NA	0.671944	1	1.94082	1	NA	NA
STMP1	0.286253	1.94903e-57	NA	NA	NA	NA	NA	NA	NA	NA	NA	NA	NA	NA	NA	NA	NA	NA	NA	NA	NA	NA	NA	NA	NA	NA	-1.76526	1	NA	NA
GPR65	0.286755	2.31483e-40	0.342044	0.0327732	-0.268258	1	0.491811	1	NA	NA	NA	NA	NA	NA	NA	NA	NA	NA	NA	NA	NA	NA	NA	NA	NA	NA	NA	NA	NA	NA
CARD19	0.287094	5.4054e-58	0.497838	2.83949e-08	0.55488	0.125098	NA	NA	NA	NA	NA	NA	NA	NA	NA	NA	NA	NA	NA	NA	NA	NA	NA	NA	-0.521044	1	-2.50925	1	NA	NA
LMO2	0.288006	2.457e-57	NA	NA	NA	NA	NA	NA	NA	NA	NA	NA	NA	NA	NA	NA	NA	NA	NA	NA	NA	NA	NA	NA	-0.458985	1	NA	NA	NA	NA
GOLGB1	0.288323	1.00016e-59	NA	NA	NA	NA	-0.251511	1	NA	NA	NA	NA	NA	NA	-0.29388	1	NA	NA	NA	NA	0.42392	1	NA	NA	-0.445373	1	NA	NA	0.412509	1
SYNGR2	0.2888	9.96876e-58	0.318431	0.249022	-0.279861	1	NA	NA	NA	NA	NA	NA	NA	NA	NA	NA	NA	NA	NA	NA	NA	NA	NA	NA	-0.350455	1	NA	NA	NA	NA
RTF1	0.290282	1.4995e-55	0.298124	1	0.663615	0.0244682	0.580001	1	NA	NA	NA	NA	NA	NA	NA	NA	NA	NA	NA	NA	NA	NA	NA	NA	-0.359263	1	NA	NA	0.386149	1
ARID4A	0.290284	1.32904e-44	NA	NA	NA	NA	-0.262283	1	NA	NA	NA	NA	NA	NA	-0.260292	1	NA	NA	NA	NA	NA	NA	NA	NA	NA	NA	NA	NA	0.281091	1
PCNX1	0.290597	7.21014e-66	0.271655	0.00217212	NA	NA	NA	NA	NA	NA	NA	NA	NA	NA	-0.289932	1	NA	NA	NA	NA	NA	NA	NA	NA	NA	NA	NA	NA	NA	NA
MED13L	0.29078	4.31209e-35	NA	NA	0.310254	1	NA	NA	NA	NA	NA	NA	NA	NA	-0.279274	1	NA	NA	NA	NA	NA	NA	NA	NA	-0.34423	1	2.36317	1	NA	NA
SAP18	0.290925	1.27532e-48	NA	NA	0.25489	1	NA	NA	NA	NA	NA	NA	NA	NA	NA	NA	NA	NA	NA	NA	NA	NA	NA	NA	NA	NA	-0.680093	1	NA	NA
COPB1	0.291352	7.02959e-59	NA	NA	0.444044	1	-0.458283	1	NA	NA	NA	NA	NA	NA	NA	NA	NA	NA	NA	NA	0.328105	0.167709	NA	NA	NA	NA	NA	NA	0.259146	1
NUCB1	0.291393	7.34303e-59	0.593394	2.81674e-06	0.506854	0.00818032	NA	NA	NA	NA	NA	NA	NA	NA	NA	NA	NA	NA	NA	NA	NA	NA	NA	NA	NA	NA	-1.27176	1	NA	NA
DNAJA2	0.292128	2.81053e-68	NA	NA	NA	NA	NA	NA	NA	NA	NA	NA	NA	NA	NA	NA	NA	NA	NA	NA	NA	NA	NA	NA	NA	NA	-0.817661	1	NA	NA
CCDC47	0.292184	6.43698e-57	0.312103	1.16545e-05	NA	NA	-0.319412	1	NA	NA	NA	NA	NA	NA	NA	NA	NA	NA	NA	NA	NA	NA	NA	NA	NA	NA	NA	NA	NA	NA
ANXA7	0.292648	1.76657e-46	0.341513	0.000114236	0.577263	0.428207	NA	NA	NA	NA	NA	NA	NA	NA	NA	NA	NA	NA	NA	NA	NA	NA	NA	NA	-0.288322	1	NA	NA	NA	NA
SNX1	0.293347	6.26562e-52	NA	NA	0.342404	0.0519205	NA	NA	NA	NA	NA	NA	NA	NA	NA	NA	NA	NA	NA	NA	NA	NA	NA	NA	-0.26473	1	NA	NA	NA	NA
PCNX4	0.294795	6.3835e-46	NA	NA	NA	NA	-0.376896	1	NA	NA	NA	NA	NA	NA	-0.291238	1	NA	NA	NA	NA	NA	NA	NA	NA	-0.378425	1	0.622453	1	NA	NA
RRAS	0.295608	2.17785e-55	0.447966	0.00319083	0.398228	0.509373	NA	NA	NA	NA	NA	NA	NA	NA	NA	NA	NA	NA	NA	NA	NA	NA	NA	NA	NA	NA	-0.739006	1	NA	NA
CX3CR1	0.295653	9.94064e-45	1.59452	3.5154e-26	0.379888	0.232543	NA	NA	NA	NA	NA	NA	NA	NA	-0.274622	1	-0.284065	3.55153e-06	NA	NA	NA	NA	NA	NA	NA	NA	NA	NA	NA	NA
PRDX1	0.296161	3.0305e-31	0.59186	0.0165873	0.983943	0.000232165	NA	NA	NA	NA	NA	NA	NA	NA	0.295192	1	NA	NA	NA	NA	NA	NA	NA	NA	-1.18008	0.192354	2.10297	1	NA	NA
CYSTM1	0.296868	7.34217e-70	0.586976	4.22065e-10	NA	NA	-0.34825	1	NA	NA	NA	NA	NA	NA	NA	NA	NA	NA	NA	NA	NA	NA	NA	NA	NA	NA	NA	NA	NA	NA
S100A4	0.297104	9.01088e-11	0.545105	0.00783591	0.671172	1	-0.665514	1	NA	NA	-0.251222	3.64819e-22	NA	NA	NA	NA	0.326137	0.0519368	NA	NA	-0.735543	0.464956	NA	NA	-0.788747	1	-1.22896	1	-0.45144	1
PAPOLA	0.297593	3.7134e-50	NA	NA	0.604868	0.984481	NA	NA	NA	NA	NA	NA	NA	NA	NA	NA	NA	NA	NA	NA	NA	NA	NA	NA	-0.456907	1	0.814962	1	NA	NA
YY1	0.297649	4.09962e-63	NA	NA	0.304145	1	-0.293703	1	NA	NA	NA	NA	NA	NA	NA	NA	NA	NA	NA	NA	NA	NA	NA	NA	NA	NA	NA	NA	NA	NA
ETNK1	0.297669	2.99806e-54	NA	NA	NA	NA	NA	NA	NA	NA	NA	NA	NA	NA	NA	NA	NA	NA	NA	NA	NA	NA	NA	NA	NA	NA	-1.09369	1	0.419616	1
THOC7	0.298297	1.98597e-73	NA	NA	0.353886	1	NA	NA	NA	NA	NA	NA	NA	NA	NA	NA	NA	NA	NA	NA	NA	NA	NA	NA	-0.275431	1	1.21965	1	NA	NA
GTF2H5	0.299207	8.82353e-61	0.336032	0.000199041	0.465529	0.314751	NA	NA	NA	NA	NA	NA	NA	NA	NA	NA	NA	NA	NA	NA	NA	NA	NA	NA	-0.253283	1	1.07797	1	NA	NA
DPM3	0.299681	1.07932e-68	NA	NA	0.495179	0.400842	NA	NA	NA	NA	NA	NA	NA	NA	NA	NA	NA	NA	NA	NA	NA	NA	NA	NA	-0.25937	1	NA	NA	NA	NA
RAB31	0.299988	1.85218e-26	0.31487	1	0.380318	1	NA	NA	NA	NA	NA	NA	NA	NA	NA	NA	NA	NA	NA	NA	NA	NA	NA	NA	-0.266604	1	-0.986539	1	NA	NA
NDUFB10	0.301327	1.46867e-46	NA	NA	NA	NA	NA	NA	NA	NA	NA	NA	NA	NA	NA	NA	NA	NA	NA	NA	NA	NA	-0.258282	1	-0.298862	1	-0.667827	1	-0.30477	1
NDUFS5	0.302071	8.21067e-36	NA	NA	0.464174	1	-0.532348	1	NA	NA	NA	NA	NA	NA	NA	NA	NA	NA	NA	NA	0.274895	1	NA	NA	NA	NA	-0.932903	1	NA	NA
HEBP2	0.302189	7.57881e-41	0.319934	0.147097	0.581437	1	-0.257474	1	NA	NA	NA	NA	NA	NA	NA	NA	NA	NA	NA	NA	NA	NA	NA	NA	NA	NA	-0.680093	1	0.279533	1
CLEC2B	0.303186	9.76621e-46	-0.292808	1	NA	NA	0.634017	1	0.58831	3.34189e-175	0.377555	6.69318e-48	0.482644	8.01692e-13	NA	NA	0.368807	1.85527e-06	0.313067	1	-0.413301	1	NA	NA	1.09739	1	1.08484	1	NA	NA
SC5D	0.303855	1.10835e-40	NA	NA	NA	NA	0.580437	1	NA	NA	NA	NA	NA	NA	NA	NA	NA	NA	NA	NA	NA	NA	NA	NA	NA	NA	0.767575	1	1.18156	1.07836e-07
RBX1	0.304856	6.85983e-61	NA	NA	0.270527	1	NA	NA	NA	NA	NA	NA	NA	NA	NA	NA	NA	NA	NA	NA	NA	NA	NA	NA	NA	NA	-1.68143	1	NA	NA
PARK7	0.305235	2.59442e-34	NA	NA	NA	NA	-0.319962	1	NA	NA	NA	NA	NA	NA	0.288274	1	NA	NA	NA	NA	NA	NA	NA	NA	NA	NA	0.666181	1	NA	NA
SRSF9	0.305333	1.51082e-42	NA	NA	0.324297	1	NA	NA	NA	NA	NA	NA	NA	NA	NA	NA	NA	NA	NA	NA	NA	NA	NA	NA	-0.421218	1	NA	NA	NA	NA
HNRNPD	0.3055	3.20842e-31	0.36988	0.406499	0.609683	1	0.393606	1	NA	NA	NA	NA	NA	NA	NA	NA	NA	NA	NA	NA	NA	NA	NA	NA	-0.276604	1	1.29888	1	NA	NA
ARF3	0.306373	1.01346e-63	0.477757	5.08002e-05	0.382871	1	NA	NA	NA	NA	NA	NA	NA	NA	NA	NA	NA	NA	NA	NA	NA	NA	NA	NA	-0.374748	1	-0.876715	1	NA	NA
SHISA5	0.306744	3.37474e-57	NA	NA	0.484263	0.518436	NA	NA	NA	NA	NA	NA	NA	NA	-0.379924	1	NA	NA	NA	NA	NA	NA	NA	NA	NA	NA	-0.88174	1	NA	NA
PNKD	0.307113	8.5518e-57	0.303059	0.000475026	0.773396	1.74535e-05	NA	NA	NA	NA	NA	NA	NA	NA	NA	NA	NA	NA	NA	NA	NA	NA	NA	NA	NA	NA	-1.44959	1	NA	NA
PCMT1	0.30774	1.42797e-58	NA	NA	NA	NA	NA	NA	NA	NA	NA	NA	NA	NA	NA	NA	NA	NA	NA	NA	NA	NA	NA	NA	NA	NA	-1.00931	1	NA	NA
PAIP2	0.308525	5.04176e-48	NA	NA	0.291978	1	0.428726	1	NA	NA	NA	NA	NA	NA	NA	NA	NA	NA	NA	NA	NA	NA	NA	NA	NA	NA	-2.53939	1	NA	NA
MRPL57	0.309745	1.81517e-66	NA	NA	0.337767	1	NA	NA	NA	NA	NA	NA	NA	NA	0.264569	1	NA	NA	NA	NA	NA	NA	NA	NA	NA	NA	-1.25825	1	NA	NA
TLN1	0.311219	3.44823e-41	0.49828	0.802206	0.377945	1	NA	NA	NA	NA	NA	NA	NA	NA	-0.297003	1	NA	NA	NA	NA	NA	NA	NA	NA	-0.504891	1	-2.25786	1	NA	NA
CYB5R4	0.311837	8.05877e-55	NA	NA	0.293427	1	NA	NA	NA	NA	NA	NA	NA	NA	NA	NA	NA	NA	NA	NA	NA	NA	NA	NA	-0.384582	1	-0.911613	1	NA	NA
RPGR	0.312719	4.86733e-46	0.269196	1	0.29944	1	NA	NA	NA	NA	NA	NA	NA	NA	NA	NA	NA	NA	NA	NA	NA	NA	NA	NA	-0.283189	1	NA	NA	NA	NA
AL159141.1	0.3135	7.99954e-89	0.424525	1.08466e-13	NA	NA	NA	NA	NA	NA	NA	NA	NA	NA	NA	NA	NA	NA	NA	NA	NA	NA	NA	NA	-0.250385	1	NA	NA	NA	NA
BRD7	0.313608	2.00507e-61	NA	NA	0.478686	1	NA	NA	NA	NA	NA	NA	NA	NA	NA	NA	NA	NA	NA	NA	NA	NA	NA	NA	NA	NA	2.42789	1	0.757155	0.00203281
NCOR1	0.313686	7.44749e-59	NA	NA	0.566064	1	NA	NA	NA	NA	NA	NA	NA	NA	NA	NA	NA	NA	NA	NA	NA	NA	NA	NA	-0.320923	1	-1.25746	1	NA	NA
RTN3	0.313693	3.96938e-47	NA	NA	0.514262	1	-0.484364	1	NA	NA	NA	NA	NA	NA	NA	NA	NA	NA	NA	NA	NA	NA	NA	NA	-0.395139	1	-1.09171	1	NA	NA
WASHC4	0.313854	1.83473e-55	NA	NA	0.385308	1	-0.316704	1	NA	NA	NA	NA	NA	NA	-0.316215	1	NA	NA	NA	NA	NA	NA	NA	NA	-0.30975	1	NA	NA	NA	NA
GTF2I	0.314935	9.46499e-54	NA	NA	0.403992	1	NA	NA	NA	NA	NA	NA	NA	NA	NA	NA	NA	NA	NA	NA	NA	NA	NA	NA	-0.420087	1	-1.28271	1	NA	NA
HIGD1A	0.316058	4.18534e-70	0.346221	0.0100428	0.424697	0.0313981	NA	NA	NA	NA	NA	NA	NA	NA	NA	NA	NA	NA	NA	NA	NA	NA	NA	NA	NA	NA	-1.16195	1	NA	NA
UQCRC1	0.316643	2.47956e-57	NA	NA	0.630036	0.153435	NA	NA	NA	NA	NA	NA	NA	NA	NA	NA	NA	NA	NA	NA	NA	NA	NA	NA	-0.301045	1	1.56	1	NA	NA
GNG5	0.317456	2.67404e-17	0.529218	0.000137821	0.262306	1	-0.434776	1	NA	NA	NA	NA	NA	NA	NA	NA	NA	NA	NA	NA	NA	NA	NA	NA	-0.513475	1	0.892009	1	NA	NA
MT-ATP6	0.317482	6.79485e-20	NA	NA	NA	NA	0.647775	0.0284019	0.338009	1.07331e-188	NA	NA	0.297882	7.08602e-21	-1.07515	5.266e-19	0.256648	1.04448e-05	NA	NA	-0.294031	1	NA	NA	0.335023	1	0.94189	1	0.256402	0.771454
IQGAP2	0.317794	6.0134e-50	NA	NA	0.46348	1	NA	NA	NA	NA	NA	NA	NA	NA	NA	NA	NA	NA	NA	NA	NA	NA	NA	NA	-0.841416	1	NA	NA	NA	NA
WSB1	0.317794	1.20563e-37	NA	NA	NA	NA	NA	NA	NA	NA	NA	NA	NA	NA	-0.253061	1	NA	NA	-0.296145	0.000380581	NA	NA	NA	NA	-0.745463	1	NA	NA	-0.415611	1
ANP32B	0.31821	4.25657e-44	NA	NA	0.552898	1	0.308968	1	NA	NA	NA	NA	NA	NA	NA	NA	NA	NA	NA	NA	NA	NA	NA	NA	-0.455672	1	NA	NA	0.375275	1
ARHGDIA	0.318619	8.3512e-37	NA	NA	0.614006	0.0323913	NA	NA	NA	NA	NA	NA	NA	NA	0.295188	1	NA	NA	NA	NA	NA	NA	NA	NA	0.339195	1	-0.859817	1	NA	NA
VPS35	0.319148	2.52209e-76	NA	NA	NA	NA	NA	NA	NA	NA	NA	NA	NA	NA	NA	NA	NA	NA	NA	NA	NA	NA	NA	NA	-0.313845	1	1.21965	1	0.585936	1
FAM133B	0.319992	3.98235e-43	NA	NA	NA	NA	0.374903	1	NA	NA	NA	NA	NA	NA	-0.385257	1	NA	NA	NA	NA	NA	NA	NA	NA	0.510305	1	3.5488	1	NA	NA
ACAP2	0.320458	3.44044e-52	NA	NA	NA	NA	NA	NA	NA	NA	NA	NA	NA	NA	-0.29888	1	NA	NA	NA	NA	NA	NA	NA	NA	NA	NA	NA	NA	-0.469747	1
MOSPD2	0.32089	1.21657e-55	0.355145	1.02395e-05	NA	NA	NA	NA	NA	NA	NA	NA	NA	NA	NA	NA	NA	NA	NA	NA	NA	NA	NA	NA	-0.255704	1	NA	NA	NA	NA
GNB1	0.322132	1.85167e-26	0.352115	1	0.414556	1	NA	NA	NA	NA	NA	NA	NA	NA	-0.33947	1	NA	NA	NA	NA	NA	NA	NA	NA	NA	NA	NA	NA	NA	NA
MARCHF2	0.322359	5.62952e-87	0.749567	7.37149e-14	0.467202	0.00237297	NA	NA	NA	NA	NA	NA	NA	NA	NA	NA	NA	NA	NA	NA	NA	NA	NA	NA	NA	NA	-3.55709	1	NA	NA
TMPO	0.323383	5.7789e-54	-0.284923	1	0.806745	0.187329	NA	NA	NA	NA	NA	NA	NA	NA	NA	NA	NA	NA	NA	NA	NA	NA	NA	NA	NA	NA	NA	NA	NA	NA
ACTN4	0.324426	7.97316e-58	0.423611	0.0271655	0.38055	1	NA	NA	NA	NA	NA	NA	NA	NA	NA	NA	NA	NA	NA	NA	NA	NA	NA	NA	-0.779145	0.0226679	NA	NA	-0.30933	1
PIP4P2	0.324865	4.88389e-53	NA	NA	0.319955	1	NA	NA	NA	NA	NA	NA	NA	NA	NA	NA	NA	NA	NA	NA	NA	NA	NA	NA	NA	NA	-2.0925	1	NA	NA
SLCO3A1	0.32537	1.41252e-57	NA	NA	0.727723	0.289019	NA	NA	NA	NA	NA	NA	NA	NA	NA	NA	NA	NA	NA	NA	NA	NA	NA	NA	NA	NA	-0.978514	1	0.443742	1
IL27RA	0.325473	1.08847e-49	0.331066	0.0027345	0.293222	1	NA	NA	NA	NA	NA	NA	NA	NA	-0.316578	1	NA	NA	NA	NA	NA	NA	NA	NA	0.352712	1	1.11452	1	NA	NA
EIF4H	0.325649	2.07989e-49	NA	NA	0.488534	1	NA	NA	NA	NA	NA	NA	NA	NA	NA	NA	NA	NA	NA	NA	NA	NA	NA	NA	-0.339112	1	NA	NA	NA	NA
SEPTIN9	0.326107	5.22026e-85	0.720108	1.14179e-21	0.280853	1	0.805751	0.473576	NA	NA	NA	NA	NA	NA	-0.550919	1	NA	NA	NA	NA	NA	NA	NA	NA	0.642245	1	NA	NA	0.271631	1
PPM1G	0.328265	6.20207e-67	NA	NA	0.268964	1	NA	NA	NA	NA	NA	NA	NA	NA	NA	NA	NA	NA	NA	NA	NA	NA	NA	NA	NA	NA	-0.605943	1	NA	NA
ZNF207	0.328873	2.29843e-37	0.355843	1	NA	NA	NA	NA	NA	NA	NA	NA	NA	NA	NA	NA	NA	NA	NA	NA	NA	NA	NA	NA	-0.472554	1	NA	NA	NA	NA
TBCA	0.329076	3.42252e-51	NA	NA	0.565097	1	NA	NA	NA	NA	NA	NA	NA	NA	NA	NA	NA	NA	NA	NA	NA	NA	NA	NA	NA	NA	-1.23584	1	NA	NA
MKRN1	0.329214	2.4121e-58	NA	NA	0.254448	1	NA	NA	NA	NA	NA	NA	NA	NA	NA	NA	NA	NA	NA	NA	NA	NA	NA	NA	NA	NA	-2.24948	1	NA	NA
DNAJC7	0.329533	6.09949e-59	0.309681	0.0251536	0.472	1	-0.490456	1	NA	NA	NA	NA	NA	NA	-0.284626	1	NA	NA	NA	NA	NA	NA	NA	NA	-0.380653	1	0.918009	1	NA	NA
NADK	0.330478	4.95577e-73	NA	NA	0.388661	1	-0.363907	1	NA	NA	NA	NA	NA	NA	NA	NA	NA	NA	NA	NA	NA	NA	NA	NA	NA	NA	NA	NA	NA	NA
SLC12A6	0.330751	2.4604e-64	0.274663	0.123956	0.354378	1	NA	NA	NA	NA	NA	NA	NA	NA	NA	NA	NA	NA	NA	NA	NA	NA	NA	NA	-0.327092	1	NA	NA	NA	NA
PIK3AP1	0.33095	3.48413e-39	0.384118	0.125452	0.676524	0.012761	-0.259054	1	NA	NA	NA	NA	NA	NA	NA	NA	NA	NA	NA	NA	NA	NA	NA	NA	NA	NA	NA	NA	NA	NA
VPS29	0.331706	5.25862e-67	NA	NA	0.269824	1	NA	NA	NA	NA	NA	NA	NA	NA	NA	NA	NA	NA	NA	NA	NA	NA	NA	NA	NA	NA	-0.401458	1	NA	NA
RAP1A	0.332299	2.22856e-46	0.281527	1	NA	NA	NA	NA	NA	NA	-0.25155	1.96445e-56	NA	NA	NA	NA	NA	NA	NA	NA	NA	NA	NA	NA	NA	NA	NA	NA	NA	NA
ETFB	0.332366	1.38493e-68	0.427411	0.000161178	0.608882	0.084804	NA	NA	NA	NA	NA	NA	NA	NA	NA	NA	NA	NA	NA	NA	NA	NA	NA	NA	-0.290355	1	-1.18	1	NA	NA
ARPC4	0.332567	5.17482e-27	0.365461	1	0.426299	1	NA	NA	NA	NA	NA	NA	NA	NA	NA	NA	NA	NA	NA	NA	NA	NA	NA	NA	NA	NA	-2.71097	1	NA	NA
KLF9	0.332663	2.06845e-45	NA	NA	NA	NA	0.396393	1	NA	NA	NA	NA	NA	NA	NA	NA	NA	NA	NA	NA	NA	NA	NA	NA	NA	NA	-1.47164	1	NA	NA
GNB4	0.332667	2.18205e-69	NA	NA	NA	NA	NA	NA	NA	NA	NA	NA	NA	NA	NA	NA	NA	NA	NA	NA	NA	NA	NA	NA	-0.432939	1	NA	NA	NA	NA
YPEL5	0.332746	7.15006e-49	-0.491325	0.0223296	-0.689298	1	-0.45989	1	-0.379235	1.66298e-210	-0.287121	5.88253e-57	NA	NA	-0.274257	1	-0.439227	1.70306e-33	-0.470596	5.43289e-22	NA	NA	NA	NA	NA	NA	1.79648	1	-0.256156	1
PTPRE	0.333153	4.27723e-16	NA	NA	NA	NA	NA	NA	NA	NA	NA	NA	NA	NA	0.301952	1	NA	NA	-0.287394	0.0080693	NA	NA	0.409723	1	NA	NA	NA	NA	0.363001	1
CAPNS1	0.333192	1.47448e-27	NA	NA	NA	NA	NA	NA	NA	NA	NA	NA	NA	NA	NA	NA	NA	NA	NA	NA	NA	NA	NA	NA	-0.406881	1	-1.67331	1	NA	NA
RHOA	0.333329	2.89851e-16	0.643614	8.18401e-11	0.779262	4.03039e-05	NA	NA	NA	NA	NA	NA	NA	NA	NA	NA	NA	NA	NA	NA	NA	NA	NA	NA	NA	NA	-1.50007	1	NA	NA
LASP1	0.336395	5.21699e-70	0.322653	0.109819	0.472443	1	NA	NA	NA	NA	NA	NA	NA	NA	NA	NA	NA	NA	NA	NA	NA	NA	NA	NA	NA	NA	-0.841883	1	NA	NA
VAPA	0.338712	6.33397e-27	0.389619	0.912898	0.502041	1	NA	NA	NA	NA	NA	NA	NA	NA	NA	NA	NA	NA	NA	NA	NA	NA	NA	NA	-0.419337	1	NA	NA	0.33277	1
MT-ND5	0.338965	1.83913e-24	0.384411	1	0.497901	1	0.409334	1	0.414152	4.54983e-184	NA	NA	0.282089	1.72273e-12	-1.05862	8.84456e-09	0.300663	1.57447e-07	NA	NA	NA	NA	0.464192	0.141146	NA	NA	1.06678	1	0.438063	0.000376727
TIPARP	0.339949	3.71864e-48	0.319908	1	-0.974817	0.0222792	NA	NA	NA	NA	NA	NA	NA	NA	NA	NA	-0.294728	5.97413e-20	NA	NA	NA	NA	NA	NA	-0.433743	1	NA	NA	-0.356125	1
PSMC1	0.341767	9.21046e-78	NA	NA	0.487577	1	NA	NA	NA	NA	NA	NA	NA	NA	NA	NA	NA	NA	NA	NA	NA	NA	NA	NA	-0.327777	1	NA	NA	NA	NA
OSTF1	0.342336	3.13956e-53	NA	NA	NA	NA	NA	NA	NA	NA	NA	NA	NA	NA	NA	NA	NA	NA	NA	NA	NA	NA	NA	NA	NA	NA	-1.66736	1	NA	NA
DYNLRB1	0.342565	8.56766e-65	NA	NA	NA	NA	NA	NA	NA	NA	NA	NA	NA	NA	NA	NA	NA	NA	NA	NA	NA	NA	NA	NA	-0.54697	1	-1.63272	1	NA	NA
MSN	0.343141	1.86392e-16	NA	NA	0.486534	1	NA	NA	NA	NA	-0.26598	1.32886e-34	NA	NA	-0.400323	1	NA	NA	NA	NA	NA	NA	NA	NA	NA	NA	-0.388122	1	-0.274158	1
CORO1C	0.343242	5.39985e-53	0.712287	3.06734e-09	0.468302	1	NA	NA	NA	NA	NA	NA	NA	NA	NA	NA	NA	NA	NA	NA	NA	NA	NA	NA	NA	NA	-0.835255	1	NA	NA
TALDO1	0.34386	5.07624e-18	0.72656	5.97232e-07	1.05549	1.72252e-10	NA	NA	NA	NA	NA	NA	NA	NA	NA	NA	NA	NA	NA	NA	NA	NA	-0.275438	1	-0.905161	0.376117	-3.46966	1	NA	NA
WASF2	0.343911	8.0367e-52	NA	NA	0.465524	1	NA	NA	NA	NA	NA	NA	NA	NA	-0.298497	1	NA	NA	NA	NA	NA	NA	NA	NA	-0.48275	1	1.87006	1	NA	NA
DBNL	0.344336	6.29345e-54	NA	NA	0.351665	1	NA	NA	NA	NA	NA	NA	NA	NA	NA	NA	NA	NA	NA	NA	NA	NA	NA	NA	NA	NA	-1.56398	1	NA	NA
RPS6KA1	0.344863	5.80203e-82	NA	NA	0.471008	0.380437	NA	NA	NA	NA	NA	NA	NA	NA	NA	NA	NA	NA	NA	NA	NA	NA	NA	NA	-0.30471	1	NA	NA	NA	NA
MRPL51	0.345055	2.99647e-73	0.387266	0.00071383	0.696294	0.0054658	NA	NA	NA	NA	NA	NA	NA	NA	NA	NA	NA	NA	NA	NA	NA	NA	NA	NA	-0.359429	1	0.484585	1	NA	NA
BSG	0.345244	2.39597e-70	0.373119	1	0.36838	1	NA	NA	NA	NA	NA	NA	NA	NA	NA	NA	NA	NA	NA	NA	NA	NA	NA	NA	-0.474573	1	0.290881	1	-0.273935	1
IGLL5	0.345831	1.78201e-93	0.352666	4.24265e-11	NA	NA	NA	NA	NA	NA	NA	NA	NA	NA	NA	NA	NA	NA	NA	NA	0.332844	1	NA	NA	NA	NA	-0.970787	1	-1.00876	0.925954
MARCHF6	0.345882	1.09299e-76	0.348483	1.90151e-09	NA	NA	NA	NA	NA	NA	NA	NA	NA	NA	-0.308058	1	NA	NA	NA	NA	NA	NA	NA	NA	NA	NA	0.474619	1	0.441707	1
LRRFIP2	0.346818	6.69334e-62	NA	NA	NA	NA	NA	NA	NA	NA	NA	NA	NA	NA	NA	NA	NA	NA	NA	NA	NA	NA	NA	NA	-0.4981	1	-1.15648	1	NA	NA
CAPZB	0.347638	2.84868e-37	NA	NA	0.407624	1	NA	NA	NA	NA	NA	NA	NA	NA	NA	NA	NA	NA	NA	NA	NA	NA	-0.277857	1	NA	NA	-2.49312	1	NA	NA
LAIR1	0.348011	1.73045e-65	0.716235	4.55045e-10	0.826208	7.596e-05	NA	NA	NA	NA	NA	NA	NA	NA	NA	NA	NA	NA	NA	NA	NA	NA	NA	NA	-0.415048	1	NA	NA	NA	NA
COPB2	0.348578	4.24663e-73	0.403215	0.000130519	0.472407	0.0181181	NA	NA	NA	NA	NA	NA	NA	NA	NA	NA	NA	NA	NA	NA	NA	NA	-0.256618	1	NA	NA	NA	NA	NA	NA
DOK3	0.348578	2.73231e-91	0.320055	1.47769e-06	0.428988	1.73342e-06	NA	NA	NA	NA	NA	NA	NA	NA	NA	NA	NA	NA	NA	NA	NA	NA	NA	NA	NA	NA	-0.490221	1	NA	NA
PTBP1	0.350058	1.68246e-59	NA	NA	0.595974	1	-0.297455	1	NA	NA	NA	NA	NA	NA	NA	NA	NA	NA	NA	NA	NA	NA	0.266449	1	NA	NA	NA	NA	0.432358	1
PTPRA	0.350742	1.87777e-64	NA	NA	0.419688	1	NA	NA	NA	NA	NA	NA	NA	NA	NA	NA	NA	NA	NA	NA	NA	NA	NA	NA	NA	NA	-1.61352	1	NA	NA
HNRNPK	0.350832	2.45056e-24	NA	NA	0.584132	0.0526795	NA	NA	NA	NA	NA	NA	NA	NA	NA	NA	NA	NA	NA	NA	NA	NA	NA	NA	NA	NA	-0.555173	1	0.486919	1
RIT1	0.352001	9.47787e-70	0.564574	3.41706e-07	NA	NA	NA	NA	NA	NA	NA	NA	NA	NA	NA	NA	NA	NA	NA	NA	NA	NA	NA	NA	NA	NA	-2.42358	1	NA	NA
SORT1	0.352157	2.8145e-72	NA	NA	0.486509	0.130106	NA	NA	NA	NA	NA	NA	NA	NA	NA	NA	NA	NA	NA	NA	NA	NA	NA	NA	NA	NA	-0.490221	1	NA	NA
STAT1	0.352267	2.08087e-61	NA	NA	0.567952	0.420832	0.427782	1	NA	NA	NA	NA	NA	NA	-0.509366	1	0.265627	8.20945e-05	0.320085	3.37862e-06	0.795575	1.89952e-09	NA	NA	NA	NA	1.21965	1	0.327941	1
USP8	0.352394	5.11343e-57	NA	NA	NA	NA	0.310106	1	NA	NA	NA	NA	NA	NA	NA	NA	NA	NA	NA	NA	NA	NA	NA	NA	-0.557152	1	NA	NA	-0.252253	1
RRP12	0.35313	3.65985e-74	NA	NA	NA	NA	NA	NA	NA	NA	NA	NA	NA	NA	NA	NA	NA	NA	NA	NA	NA	NA	NA	NA	NA	NA	-0.667827	1	NA	NA
CDKN1B	0.353163	5.41037e-51	NA	NA	0.269632	1	NA	NA	NA	NA	NA	NA	NA	NA	-0.27354	1	NA	NA	NA	NA	NA	NA	-0.252058	1	NA	NA	1.76888	1	NA	NA
SET	0.354207	1.57249e-27	NA	NA	0.509364	1	0.382693	1	NA	NA	NA	NA	NA	NA	NA	NA	NA	NA	NA	NA	0.261548	1	NA	NA	-0.28973	1	1.08052	1	NA	NA
PSTPIP2	0.354448	2.30273e-65	NA	NA	0.571729	0.0953149	NA	NA	NA	NA	NA	NA	NA	NA	NA	NA	NA	NA	NA	NA	NA	NA	NA	NA	NA	NA	-1.25895	1	NA	NA
STAG2	0.355437	3.19169e-60	NA	NA	0.419264	1	NA	NA	NA	NA	NA	NA	NA	NA	NA	NA	NA	NA	NA	NA	NA	NA	0.281242	1	-0.263586	1	0.948315	1	0.509397	1
PSMD1	0.356294	2.51566e-79	0.584833	0.00466607	0.563931	0.316753	-0.278703	1	NA	NA	NA	NA	NA	NA	NA	NA	NA	NA	NA	NA	NA	NA	NA	NA	NA	NA	NA	NA	NA	NA
LCOR	0.357188	4.18121e-43	NA	NA	NA	NA	NA	NA	NA	NA	NA	NA	NA	NA	NA	NA	NA	NA	NA	NA	NA	NA	NA	NA	-0.366885	1	NA	NA	NA	NA
TERF2IP	0.357523	2.65313e-59	NA	NA	NA	NA	NA	NA	NA	NA	NA	NA	NA	NA	-0.523624	1	NA	NA	NA	NA	NA	NA	NA	NA	0.606808	1	-0.275482	1	NA	NA
COMMD7	0.357648	7.77578e-80	NA	NA	0.31902	1	NA	NA	NA	NA	NA	NA	NA	NA	-0.255109	1	NA	NA	NA	NA	NA	NA	NA	NA	-0.377846	1	-2.11379	1	NA	NA
BST2	0.359665	3.32385e-42	0.29271	0.183333	0.815033	0.000875044	-0.280494	1	NA	NA	NA	NA	NA	NA	-0.394572	1	NA	NA	NA	NA	NA	NA	NA	NA	-0.565567	1	NA	NA	NA	NA
VPS4B	0.361473	2.95435e-74	NA	NA	0.336659	1	NA	NA	NA	NA	NA	NA	NA	NA	-0.275061	1	NA	NA	NA	NA	NA	NA	NA	NA	0.29597	1	1.45039	1	0.439209	1
HNRNPM	0.362481	1.15941e-37	0.396606	1	0.778521	0.00320424	0.28994	1	NA	NA	NA	NA	NA	NA	NA	NA	NA	NA	NA	NA	NA	NA	NA	NA	NA	NA	-0.586851	1	NA	NA
ATP5IF1	0.362894	6.72534e-69	NA	NA	0.631766	0.116904	0.263334	1	NA	NA	NA	NA	NA	NA	NA	NA	NA	NA	NA	NA	NA	NA	NA	NA	NA	NA	-0.765312	1	NA	NA
TAGLN2	0.363783	5.23255e-24	0.34552	1	NA	NA	NA	NA	-0.273464	8.53719e-85	NA	NA	NA	NA	NA	NA	NA	NA	NA	NA	NA	NA	NA	NA	-0.563138	1	-1.83768	1	-0.281647	1
CCDC88A	0.364424	4.45471e-29	0.514736	0.00961469	NA	NA	NA	NA	NA	NA	NA	NA	NA	NA	NA	NA	NA	NA	NA	NA	NA	NA	NA	NA	-0.465099	1	1.05588	1	NA	NA
RPN2	0.365024	1.41488e-35	0.257358	1	0.44744	1	NA	NA	NA	NA	NA	NA	NA	NA	NA	NA	NA	NA	NA	NA	NA	NA	NA	NA	NA	NA	-0.685883	1	NA	NA
TMED9	0.365557	6.10681e-71	NA	NA	0.65029	0.00321591	NA	NA	NA	NA	NA	NA	NA	NA	NA	NA	NA	NA	NA	NA	0.27369	1	NA	NA	-0.381313	1	0.725614	1	NA	NA
S100A11	0.365859	2.34147e-18	0.629165	3.73564e-14	0.933184	0.00025492	-0.330481	1	NA	NA	NA	NA	NA	NA	NA	NA	0.321545	7.71516e-13	NA	NA	NA	NA	0.576517	1	-0.516954	1	1.21583	1	NA	NA
SNX17	0.3661	1.45032e-69	NA	NA	0.288878	1	NA	NA	NA	NA	NA	NA	NA	NA	NA	NA	NA	NA	NA	NA	NA	NA	NA	NA	NA	NA	-1.07799	1	NA	NA
CASP8	0.369409	5.38565e-58	NA	NA	NA	NA	0.355265	1	NA	NA	NA	NA	NA	NA	NA	NA	NA	NA	NA	NA	0.297859	1	0.278754	1	NA	NA	1.21965	1	0.629539	0.0122244
NDUFB7	0.370623	3.21126e-62	NA	NA	0.612129	0.0567607	NA	NA	NA	NA	NA	NA	NA	NA	NA	NA	NA	NA	NA	NA	NA	NA	NA	NA	NA	NA	-1.0602	1	NA	NA
UBE2L3	0.371084	1.71357e-52	0.340175	1	0.760092	0.000988035	0.259765	1	NA	NA	NA	NA	NA	NA	NA	NA	NA	NA	NA	NA	NA	NA	NA	NA	NA	NA	-0.697997	1	NA	NA
TRPS1	0.371203	7.37104e-50	NA	NA	NA	NA	-0.283457	1	NA	NA	NA	NA	NA	NA	NA	NA	NA	NA	NA	NA	NA	NA	NA	NA	NA	NA	NA	NA	-0.498678	1
COX6B1	0.371503	1.97965e-31	0.354234	0.191891	0.521694	1	NA	NA	NA	NA	NA	NA	NA	NA	0.350498	1	NA	NA	NA	NA	NA	NA	NA	NA	NA	NA	-1.65913	1	NA	NA
RALBP1	0.371613	1.09486e-71	NA	NA	0.380669	1	NA	NA	NA	NA	NA	NA	NA	NA	NA	NA	NA	NA	NA	NA	NA	NA	NA	NA	-0.399031	1	0.465994	1	NA	NA
BRI3	0.374188	6.8741e-23	0.673311	2.4489e-05	0.443177	1	-0.44607	1	NA	NA	NA	NA	NA	NA	NA	NA	NA	NA	NA	NA	NA	NA	NA	NA	NA	NA	NA	NA	NA	NA
VCL	0.374751	7.85793e-67	NA	NA	NA	NA	NA	NA	NA	NA	NA	NA	NA	NA	NA	NA	NA	NA	NA	NA	NA	NA	NA	NA	-0.333309	1	-1.57206	1	NA	NA
MICOS13	0.37636	2.68839e-85	0.309562	3.73202e-10	NA	NA	0.531992	1	NA	NA	NA	NA	NA	NA	-0.266846	1	NA	NA	NA	NA	NA	NA	NA	NA	NA	NA	NA	NA	NA	NA
KIF5B	0.377282	1.86489e-43	NA	NA	0.349878	1	NA	NA	NA	NA	NA	NA	NA	NA	NA	NA	NA	NA	NA	NA	NA	NA	NA	NA	NA	NA	-1.06839	1	0.316011	1
SRSF4	0.378559	1.33053e-70	NA	NA	0.33689	1	NA	NA	NA	NA	NA	NA	NA	NA	-0.358649	1	NA	NA	NA	NA	NA	NA	NA	NA	-0.256313	1	2.16854	1	0.399544	1
PPTC7	0.379001	1.05627e-63	NA	NA	0.518836	1	-0.302689	1	NA	NA	NA	NA	NA	NA	NA	NA	NA	NA	NA	NA	NA	NA	NA	NA	NA	NA	NA	NA	NA	NA
COX6A1	0.379291	7.49127e-36	NA	NA	0.312709	1	NA	NA	NA	NA	NA	NA	NA	NA	0.595441	0.00063196	NA	NA	NA	NA	NA	NA	NA	NA	NA	NA	-1.173	1	NA	NA
SCAND1	0.3794	1.5234e-68	NA	NA	0.378915	1	NA	NA	NA	NA	NA	NA	NA	NA	NA	NA	NA	NA	NA	NA	NA	NA	NA	NA	NA	NA	-0.680093	1	NA	NA
EMC3	0.38	1.88666e-76	NA	NA	NA	NA	NA	NA	NA	NA	NA	NA	NA	NA	NA	NA	NA	NA	NA	NA	NA	NA	NA	NA	NA	NA	-2.79099	1	NA	NA
YWHAH	0.380891	4.26582e-78	0.386021	0.00384197	NA	NA	-0.313945	1	NA	NA	NA	NA	NA	NA	NA	NA	NA	NA	NA	NA	NA	NA	NA	NA	-0.345544	1	-1.69014	1	NA	NA
UBXN4	0.381132	3.26379e-64	0.338581	0.730672	0.532477	1	0.445443	1	NA	NA	NA	NA	NA	NA	NA	NA	NA	NA	NA	NA	NA	NA	NA	NA	-0.266173	1	NA	NA	NA	NA
NDUFA6	0.381387	5.95504e-68	NA	NA	NA	NA	0.294475	1	NA	NA	NA	NA	NA	NA	0.286456	1	NA	NA	NA	NA	0.324079	1	NA	NA	NA	NA	-0.285921	1	NA	NA
LDHA	0.381518	7.48593e-43	NA	NA	NA	NA	-0.387156	1	NA	NA	NA	NA	NA	NA	NA	NA	NA	NA	NA	NA	NA	NA	NA	NA	0.624077	1	2.82869	1	NA	NA
BIN2	0.381986	1.93643e-71	NA	NA	0.49331	1	NA	NA	NA	NA	-0.368033	7.22226e-76	-0.279727	4.9138e-16	-0.37307	1	-0.377233	1.50418e-35	NA	NA	NA	NA	NA	NA	-0.39224	1	-1.94968	1	-0.635869	1
CYBA	0.382426	5.79046e-21	0.719188	8.61697e-14	NA	NA	-0.532407	1	NA	NA	NA	NA	NA	NA	NA	NA	-0.273166	4.94936e-20	NA	NA	NA	NA	0.251802	1	NA	NA	0.450959	1	-0.28357	1
KIAA0930	0.383223	2.6954e-79	0.265655	0.423938	0.398686	1	NA	NA	NA	NA	NA	NA	NA	NA	NA	NA	NA	NA	NA	NA	NA	NA	NA	NA	-0.294053	1	NA	NA	NA	NA
LPCAT2	0.383491	1.78539e-74	0.427533	6.25892e-06	NA	NA	NA	NA	NA	NA	NA	NA	NA	NA	NA	NA	NA	NA	NA	NA	NA	NA	NA	NA	-0.326295	1	NA	NA	NA	NA
TYMP	0.383669	2.17567e-19	0.954343	9.20075e-17	1.07443	9.87142e-05	NA	NA	NA	NA	NA	NA	NA	NA	NA	NA	0.325352	6.00035e-27	NA	NA	0.349914	1	0.548251	0.000937173	NA	NA	-0.287548	1	NA	NA
HECA	0.386075	5.18356e-65	NA	NA	NA	NA	0.433194	1	NA	NA	NA	NA	NA	NA	-0.25418	1	NA	NA	NA	NA	NA	NA	NA	NA	NA	NA	NA	NA	NA	NA
SRP9	0.386834	1.18722e-64	NA	NA	0.53798	1	NA	NA	NA	NA	NA	NA	NA	NA	NA	NA	-0.272725	1.29945e-28	NA	NA	NA	NA	-0.276224	1	-0.352383	1	-1.72469	1	NA	NA
ATP6V1E1	0.387645	4.12483e-74	0.319433	0.0148063	0.609467	0.0238454	NA	NA	NA	NA	NA	NA	NA	NA	-0.252941	1	NA	NA	NA	NA	NA	NA	NA	NA	NA	NA	0.592535	1	NA	NA
ARHGEF40	0.390032	5.83714e-68	0.516811	1.72544e-12	0.640662	0.000184476	NA	NA	NA	NA	NA	NA	NA	NA	NA	NA	NA	NA	NA	NA	NA	NA	NA	NA	-0.362684	1	NA	NA	NA	NA
RGS18	0.39024	4.69329e-64	NA	NA	NA	NA	NA	NA	NA	NA	NA	NA	NA	NA	NA	NA	NA	NA	NA	NA	NA	NA	NA	NA	NA	NA	-2.76373	1	NA	NA
IDI1	0.391284	2.17659e-65	0.397364	0.0775262	NA	NA	-0.542884	1	NA	NA	-0.305183	5.40985e-59	NA	NA	-0.631859	0.0655007	-0.298804	5.69553e-25	NA	NA	NA	NA	NA	NA	NA	NA	1.06246	1	NA	NA
GRB2	0.391463	1.11362e-30	0.453827	0.00324507	0.521511	0.0771993	NA	NA	NA	NA	NA	NA	NA	NA	NA	NA	NA	NA	NA	NA	NA	NA	NA	NA	-0.611448	1	0.262003	1	NA	NA
DNAJC8	0.391964	1.32788e-61	0.535002	0.00069916	0.499247	1	NA	NA	NA	NA	NA	NA	NA	NA	NA	NA	NA	NA	NA	NA	NA	NA	NA	NA	NA	NA	-1.00497	1	NA	NA
UBE2I	0.393685	8.41523e-58	NA	NA	0.494328	1	NA	NA	NA	NA	NA	NA	NA	NA	-0.265317	1	NA	NA	NA	NA	NA	NA	NA	NA	NA	NA	NA	NA	NA	NA
FCER1G	0.394526	1.14488e-26	0.628814	7.12319e-12	0.879324	0.000523713	-1.12647	0.00883825	NA	NA	NA	NA	NA	NA	NA	NA	NA	NA	NA	NA	NA	NA	0.332764	1	-0.467116	1	-2.16415	1	NA	NA
ITGB2	0.39457	2.68218e-16	0.679637	6.6908e-09	0.748668	0.000889993	NA	NA	NA	NA	-0.292585	8.68851e-33	NA	NA	NA	NA	NA	NA	NA	NA	NA	NA	0.298985	1	0.323118	1	1.29761	1	NA	NA
CCDC69	0.394798	1.46611e-54	0.256273	0.00221488	1.02317	5.97928e-05	-0.294471	1	NA	NA	NA	NA	NA	NA	NA	NA	NA	NA	NA	NA	NA	NA	NA	NA	NA	NA	NA	NA	NA	NA
UGP2	0.396325	1.30761e-80	0.259244	0.000232605	0.514497	0.00502146	NA	NA	NA	NA	NA	NA	NA	NA	NA	NA	NA	NA	NA	NA	NA	NA	NA	NA	NA	NA	-1.15186	1	0.483072	1
VSIR	0.398005	1.73281e-57	NA	NA	0.829699	0.0182056	NA	NA	NA	NA	NA	NA	NA	NA	NA	NA	NA	NA	NA	NA	NA	NA	NA	NA	NA	NA	-0.986539	1	NA	NA
NCF4	0.398542	9.09259e-74	0.459943	2.02495e-08	NA	NA	NA	NA	NA	NA	NA	NA	NA	NA	NA	NA	NA	NA	NA	NA	NA	NA	NA	NA	-0.356706	1	NA	NA	NA	NA
RPL35	0.401499	1.72905e-25	-0.254379	1	NA	NA	NA	NA	NA	NA	NA	NA	NA	NA	NA	NA	NA	NA	NA	NA	NA	NA	0.252339	1	NA	NA	NA	NA	NA	NA
ELF1	0.401628	1.10238e-34	-0.40074	0.000614147	0.37237	1	0.272591	1	NA	NA	NA	NA	0.279287	5.06275e-09	NA	NA	NA	NA	NA	NA	NA	NA	NA	NA	NA	NA	NA	NA	NA	NA
GNAI3	0.401831	1.54474e-52	NA	NA	NA	NA	NA	NA	NA	NA	NA	NA	NA	NA	NA	NA	NA	NA	NA	NA	NA	NA	NA	NA	-0.302978	1	NA	NA	-0.340305	1
CHMP2A	0.40253	1.21333e-41	0.46821	0.00115103	0.546611	1	NA	NA	NA	NA	NA	NA	NA	NA	NA	NA	NA	NA	NA	NA	NA	NA	NA	NA	-0.411164	1	NA	NA	NA	NA
PLAAT4	0.402797	3.11434e-54	0.293006	1.42082e-09	0.432279	0.368215	NA	NA	NA	NA	NA	NA	0.350056	5.99314e-09	-0.516827	1	NA	NA	NA	NA	NA	NA	0.628195	0.215282	0.894321	0.307216	NA	NA	NA	NA
TXNL4A	0.403587	1.85475e-70	NA	NA	0.271405	1	NA	NA	NA	NA	NA	NA	NA	NA	NA	NA	NA	NA	NA	NA	NA	NA	NA	NA	NA	NA	-2.2332	1	NA	NA
RAB11A	0.403953	1.10342e-76	NA	NA	0.511982	1	0.444115	1	NA	NA	NA	NA	NA	NA	NA	NA	NA	NA	NA	NA	NA	NA	NA	NA	NA	NA	-1.2082	1	NA	NA
AC004151.1	0.40732	1.25164e-92	0.498555	1.6822e-10	0.323146	1	0.694702	1	NA	NA	NA	NA	NA	NA	-0.484576	1	NA	NA	NA	NA	NA	NA	NA	NA	0.34422	1	NA	NA	0.584531	1
VAMP8	0.407412	5.1561e-38	0.860104	9.47811e-13	0.551916	0.992824	-0.416932	1	NA	NA	NA	NA	NA	NA	-0.273849	1	NA	NA	NA	NA	NA	NA	NA	NA	-0.752501	1	-1.49415	1	NA	NA
CDC42	0.407918	1.05813e-35	NA	NA	0.487348	1	NA	NA	NA	NA	NA	NA	NA	NA	NA	NA	NA	NA	NA	NA	NA	NA	NA	NA	NA	NA	-1.23936	1	NA	NA
CXorf21	0.408314	8.22392e-76	NA	NA	0.327429	1	-0.316133	1	NA	NA	NA	NA	NA	NA	NA	NA	NA	NA	NA	NA	NA	NA	NA	NA	NA	NA	NA	NA	NA	NA
KLF2	0.408675	1.1256e-56	-0.275288	1	0.409443	1	-0.316658	1	-0.313824	4.28331e-150	NA	NA	-0.265784	4.82319e-06	NA	NA	-0.460288	1.59953e-23	-0.307871	0.0056123	NA	NA	-0.909396	2.46612e-06	NA	NA	1.05414	1	NA	NA
TMX4	0.408904	2.48809e-60	NA	NA	0.49433	1	NA	NA	NA	NA	NA	NA	NA	NA	NA	NA	NA	NA	NA	NA	NA	NA	NA	NA	-0.296328	1	1.21965	1	NA	NA
TOB1	0.408933	3.42868e-61	NA	NA	0.306283	1	-0.329691	1	NA	NA	NA	NA	NA	NA	NA	NA	NA	NA	NA	NA	NA	NA	NA	NA	0.437503	1	1.21965	1	-0.308182	1
CTSC	0.410046	1.67951e-48	0.293283	1	0.610085	1	NA	NA	NA	NA	NA	NA	NA	NA	-0.307092	1	NA	NA	NA	NA	NA	NA	NA	NA	NA	NA	NA	NA	NA	NA
FDFT1	0.41181	7.00706e-81	0.375757	1	0.672807	0.65037	NA	NA	NA	NA	NA	NA	NA	NA	NA	NA	NA	NA	NA	NA	NA	NA	NA	NA	-0.352452	1	-1.11469	1	NA	NA
TPST2	0.413378	4.33483e-79	0.472799	9.88691e-08	0.412174	1	NA	NA	NA	NA	NA	NA	NA	NA	NA	NA	NA	NA	NA	NA	NA	NA	NA	NA	NA	NA	-2.71247	1	NA	NA
RESF1	0.41437	4.71056e-63	0.493847	1.39554e-10	0.480009	1	0.257321	1	NA	NA	NA	NA	NA	NA	-0.428503	1	NA	NA	0.393705	2.9305e-07	0.299278	1	NA	NA	0.373524	1	2.72001	1	0.398723	1
ABRACL	0.414568	6.47685e-63	0.374891	0.579285	0.723113	0.0378857	NA	NA	NA	NA	NA	NA	NA	NA	NA	NA	NA	NA	NA	NA	NA	NA	NA	NA	-0.409324	1	1.42133	1	NA	NA
PAK2	0.415214	3.42829e-50	0.471907	0.00962689	0.794639	0.000721409	NA	NA	NA	NA	NA	NA	NA	NA	-0.414512	1	NA	NA	NA	NA	NA	NA	NA	NA	0.297219	1	2.99765	1	0.571961	1
SYF2	0.41576	6.4513e-64	NA	NA	0.729539	0.74333	NA	NA	NA	NA	NA	NA	NA	NA	NA	NA	NA	NA	NA	NA	NA	NA	NA	NA	0.315709	1	-1.06395	1	-0.277771	1
GLT1D1	0.415817	1.63413e-90	0.441033	2.42459e-16	0.289259	0.00168443	-0.325248	1	NA	NA	NA	NA	NA	NA	NA	NA	NA	NA	NA	NA	NA	NA	NA	NA	NA	NA	NA	NA	NA	NA
GPR183	0.416213	1.69253e-20	1.23044	6.20274e-05	-0.450018	1	0.707548	1	NA	NA	NA	NA	0.385847	5.45607e-12	-0.410759	1	NA	NA	NA	NA	NA	NA	NA	NA	0.461383	1	0.57975	1	NA	NA
MRPL20	0.416336	1.75052e-71	0.310757	0.429952	0.788979	0.00250915	NA	NA	NA	NA	NA	NA	NA	NA	NA	NA	NA	NA	NA	NA	NA	NA	NA	NA	-0.259065	1	NA	NA	NA	NA
ACTR3	0.416578	2.83233e-27	0.58516	4.09532e-06	0.61862	0.210658	NA	NA	NA	NA	NA	NA	NA	NA	-0.349424	1	NA	NA	NA	NA	NA	NA	NA	NA	NA	NA	-1.48513	1	NA	NA
SEPTIN6	0.416839	1.83097e-77	0.621605	7.03128e-14	-0.405632	0.0755954	0.982163	9.29506e-05	NA	NA	NA	NA	NA	NA	-0.50246	1	NA	NA	0.436496	1.48695e-11	0.37501	1	NA	NA	NA	NA	1.42495	1	0.253793	1
PTTG1IP	0.419701	2.87132e-66	0.741736	2.05822e-13	0.438113	1	-0.265752	1	NA	NA	NA	NA	NA	NA	NA	NA	NA	NA	NA	NA	NA	NA	NA	NA	-0.284938	1	-1.87259	1	NA	NA
SPI1	0.419863	1.55043e-26	0.463555	0.00128786	0.540875	1	NA	NA	NA	NA	NA	NA	NA	NA	NA	NA	NA	NA	NA	NA	NA	NA	NA	NA	-0.482857	1	NA	NA	NA	NA
TNFSF13B	0.420058	2.70275e-36	0.501526	0.00527273	0.510365	1	-0.504759	1	NA	NA	NA	NA	NA	NA	NA	NA	NA	NA	NA	NA	NA	NA	NA	NA	NA	NA	NA	NA	NA	NA
PLXNC1	0.420337	3.64838e-71	0.592179	3.22778e-09	0.397094	1	NA	NA	NA	NA	NA	NA	NA	NA	NA	NA	NA	NA	NA	NA	NA	NA	NA	NA	-0.35518	1	1.21965	1	NA	NA
PCBP1	0.421143	5.46063e-21	0.408686	1	0.314365	1	NA	NA	NA	NA	NA	NA	NA	NA	NA	NA	NA	NA	NA	NA	NA	NA	NA	NA	-0.253766	1	-1.43142	1	0.267238	1
PDCD10	0.421227	5.3558e-84	0.359673	0.128878	0.577187	0.000558118	NA	NA	NA	NA	NA	NA	NA	NA	NA	NA	NA	NA	NA	NA	NA	NA	NA	NA	-0.263574	1	-1.2323	1	NA	NA
YWHAG	0.421251	6.37254e-65	0.403309	1.01249e-06	0.550902	1	NA	NA	NA	NA	NA	NA	NA	NA	NA	NA	NA	NA	NA	NA	NA	NA	NA	NA	-0.553176	1	NA	NA	NA	NA
RALGAPA2	0.421638	4.3525e-77	0.258583	0.0627687	0.504439	1	NA	NA	NA	NA	NA	NA	NA	NA	NA	NA	NA	NA	NA	NA	NA	NA	NA	NA	-0.365728	1	NA	NA	NA	NA
MSL1	0.421683	4.88311e-75	NA	NA	0.302946	1	NA	NA	NA	NA	NA	NA	NA	NA	NA	NA	NA	NA	NA	NA	NA	NA	NA	NA	NA	NA	-0.74718	1	NA	NA
ATP11B	0.421863	1.88278e-71	0.351341	0.000783206	0.411267	1	NA	NA	NA	NA	NA	NA	NA	NA	NA	NA	NA	NA	NA	NA	NA	NA	NA	NA	NA	NA	-0.667827	1	NA	NA
GNB2	0.424095	3.16781e-34	0.301777	1	0.634738	0.649822	NA	NA	NA	NA	NA	NA	-0.268071	3.98093e-13	NA	NA	NA	NA	NA	NA	NA	NA	NA	NA	-0.300953	1	-1.05227	1	NA	NA
RFX2	0.425109	5.61665e-88	0.478355	1.30413e-11	0.301762	1	NA	NA	NA	NA	NA	NA	NA	NA	NA	NA	NA	NA	NA	NA	NA	NA	NA	NA	-0.364172	1	NA	NA	NA	NA
COX7B	0.426706	2.87806e-38	0.438564	0.0257725	0.71966	0.00129872	0.41006	1	NA	NA	NA	NA	NA	NA	0.476344	1	NA	NA	NA	NA	NA	NA	NA	NA	NA	NA	-0.837006	1	NA	NA
CTNNA1	0.428276	2.44998e-60	0.603668	0.000341709	0.576671	0.375648	NA	NA	NA	NA	NA	NA	NA	NA	NA	NA	NA	NA	NA	NA	NA	NA	NA	NA	-0.256516	1	-0.490221	1	NA	NA
RAP1B	0.429559	3.31447e-29	NA	NA	0.351883	1	0.34816	1	NA	NA	NA	NA	NA	NA	NA	NA	NA	NA	NA	NA	NA	NA	NA	NA	NA	NA	-1.53833	1	NA	NA
PGAM1	0.430245	8.59788e-39	NA	NA	0.590379	1	-0.383383	1	NA	NA	NA	NA	NA	NA	NA	NA	NA	NA	NA	NA	NA	NA	NA	NA	NA	NA	-1.35537	1	NA	NA
MTPN	0.431553	2.418e-30	NA	NA	0.275172	1	NA	NA	NA	NA	NA	NA	NA	NA	-0.320554	1	NA	NA	NA	NA	NA	NA	NA	NA	NA	NA	-1.65162	1	NA	NA
RHOG	0.432536	2.4525e-54	0.256283	1	0.270617	1	-0.419923	1	NA	NA	NA	NA	NA	NA	NA	NA	NA	NA	NA	NA	NA	NA	NA	NA	NA	NA	0.622453	1	NA	NA
SELENOW	0.433366	1.57371e-80	0.497747	0.00575191	0.570671	1	NA	NA	NA	NA	NA	NA	NA	NA	NA	NA	NA	NA	NA	NA	NA	NA	NA	NA	NA	NA	-1.3266	1	-0.306622	1
H1-2	0.434405	1.60852e-78	0.279842	0.000831878	0.42788	1	NA	NA	NA	NA	NA	NA	0.319587	8.26719e-13	NA	NA	NA	NA	0.313885	5.07039e-06	0.482878	1	0.637116	1	NA	NA	-1.79473	1	-0.832513	1
DPYSL2	0.436781	1.32208e-55	0.771729	3.13328e-09	0.712676	1	0.514302	1	NA	NA	NA	NA	NA	NA	NA	NA	NA	NA	NA	NA	NA	NA	NA	NA	NA	NA	-1.27053	1	NA	NA
MIER1	0.438068	7.8403e-57	0.270609	1	0.440332	1	NA	NA	NA	NA	NA	NA	NA	NA	NA	NA	NA	NA	NA	NA	NA	NA	0.271028	1	NA	NA	-0.715827	1	NA	NA
XRCC5	0.440692	4.28899e-60	0.289428	1	0.648473	0.17474	NA	NA	NA	NA	NA	NA	NA	NA	-0.299931	1	NA	NA	NA	NA	NA	NA	NA	NA	-0.365762	1	-0.95959	1	NA	NA
CHCHD7	0.440712	2.34023e-79	0.529438	5.02309e-12	0.582907	1.84006e-05	-0.253681	1	NA	NA	NA	NA	NA	NA	NA	NA	NA	NA	NA	NA	NA	NA	NA	NA	NA	NA	1.25086	1	NA	NA
CREG1	0.441168	2.81555e-44	1.00064	4.77684e-19	1.26498	2.67446e-06	NA	NA	NA	NA	NA	NA	NA	NA	NA	NA	NA	NA	NA	NA	NA	NA	0.271976	1	-0.404675	1	NA	NA	NA	NA
BAZ2B	0.441379	1.16367e-64	0.250653	1	NA	NA	-0.271573	1	NA	NA	NA	NA	NA	NA	NA	NA	NA	NA	NA	NA	NA	NA	NA	NA	-0.315668	1	1.05578	1	NA	NA
PRKAR1A	0.442666	1.56063e-43	0.417657	0.0849908	NA	NA	NA	NA	NA	NA	NA	NA	NA	NA	-0.400138	1	NA	NA	NA	NA	NA	NA	NA	NA	-0.323948	1	1.29303	1	-0.398446	1
HSPB1	0.443017	6.79328e-85	0.292631	1	1.20504	2.49939e-07	0.283796	1	NA	NA	NA	NA	NA	NA	NA	NA	NA	NA	NA	NA	NA	NA	NA	NA	NA	NA	-0.423148	1	NA	NA
KTN1	0.44545	7.61679e-51	NA	NA	0.45874	1	NA	NA	NA	NA	NA	NA	NA	NA	-0.324408	1	NA	NA	NA	NA	0.260939	1	NA	NA	-0.517702	1	0.757426	1	0.397765	1
TMSB10	0.445944	7.04889e-53	0.747467	4.08523e-24	0.521314	0.00163747	0.641242	0.055432	NA	NA	NA	NA	0.350433	1.44865e-23	0.407012	0.0349269	0.270167	1.03443e-23	0.318413	8.82737e-15	-0.433372	0.991508	NA	NA	0.692263	0.00803385	1.37632	1	NA	NA
TMEM50A	0.44779	3.30479e-52	0.415911	0.0363931	0.469741	1	NA	NA	NA	NA	NA	NA	NA	NA	NA	NA	NA	NA	NA	NA	NA	NA	NA	NA	0.30513	1	-2.25233	1	-0.324871	1
PAG1	0.448408	8.93604e-70	0.282375	1	0.547447	1	0.34719	1	NA	NA	NA	NA	NA	NA	-0.301744	1	NA	NA	NA	NA	NA	NA	NA	NA	NA	NA	1.11452	1	0.451828	1
ATP6V0D1	0.453112	3.43695e-36	0.257274	1	0.45495	1	-0.271736	1	NA	NA	NA	NA	NA	NA	NA	NA	NA	NA	NA	NA	NA	NA	NA	NA	NA	NA	NA	NA	NA	NA
LAP3	0.454241	4.33289e-57	0.505079	0.248142	1.0952	1.31419e-08	-0.321054	1	NA	NA	NA	NA	NA	NA	NA	NA	NA	NA	NA	NA	0.376968	1	NA	NA	NA	NA	1.78676	1	NA	NA
IGFBP7	0.454676	6.86502e-61	0.346119	8.66259e-07	0.372918	1	NA	NA	NA	NA	NA	NA	NA	NA	NA	NA	NA	NA	NA	NA	NA	NA	NA	NA	-0.704052	1	NA	NA	NA	NA
EIF5B	0.454682	5.32319e-42	NA	NA	0.586707	1	NA	NA	NA	NA	NA	NA	NA	NA	NA	NA	NA	NA	NA	NA	0.251369	1	NA	NA	NA	NA	NA	NA	0.72092	0.0119674
PLEKHO1	0.456671	3.63842e-79	0.465655	0.000366607	NA	NA	NA	NA	NA	NA	NA	NA	NA	NA	NA	NA	NA	NA	NA	NA	NA	NA	NA	NA	-0.417687	1	-2.58691	1	NA	NA
BCL10	0.45787	2.0026e-74	0.281935	0.00746251	NA	NA	-0.261684	1	NA	NA	NA	NA	NA	NA	NA	NA	NA	NA	NA	NA	NA	NA	NA	NA	0.28197	1	-0.918453	1	NA	NA
MOB1A	0.45883	8.17457e-39	0.311782	1	0.528838	1	-0.334583	1	NA	NA	NA	NA	NA	NA	-0.267812	1	NA	NA	NA	NA	NA	NA	NA	NA	NA	NA	NA	NA	NA	NA
SERF2	0.458972	2.00607e-43	0.613354	3.73603e-12	0.672376	0.00583827	NA	NA	NA	NA	NA	NA	NA	NA	NA	NA	NA	NA	NA	NA	NA	NA	NA	NA	0.290153	1	-1.4228	1	NA	NA
ATP6V1D	0.459275	7.2554e-77	0.384249	6.01317e-09	NA	NA	NA	NA	NA	NA	NA	NA	NA	NA	NA	NA	NA	NA	NA	NA	NA	NA	NA	NA	NA	NA	-1.14347	1	NA	NA
VCP	0.460094	4.51263e-64	0.31374	0.000614381	0.532664	1	NA	NA	NA	NA	NA	NA	NA	NA	NA	NA	NA	NA	NA	NA	NA	NA	NA	NA	NA	NA	-0.954618	1	NA	NA
PLP2	0.462405	9.97193e-44	1.16528	4.22335e-23	NA	NA	-0.271375	1	NA	NA	NA	NA	0.261333	0.000134768	NA	NA	0.268729	1.47905e-22	NA	NA	NA	NA	NA	NA	-0.443053	1	NA	NA	NA	NA
ANP32A	0.462813	2.57929e-66	0.262405	0.491161	0.653594	1	NA	NA	NA	NA	NA	NA	NA	NA	NA	NA	NA	NA	NA	NA	NA	NA	NA	NA	-0.378983	1	-0.931021	1	NA	NA
ZBTB7A	0.463346	3.05644e-38	0.671704	3.78942e-06	0.575842	1	NA	NA	NA	NA	NA	NA	NA	NA	NA	NA	NA	NA	NA	NA	NA	NA	NA	NA	-0.269516	1	1.38873	1	-0.53106	1
MT-ND4L	0.464366	2.09306e-58	0.654556	0.000117656	0.783288	0.591659	0.388147	1	0.414239	2.03064e-190	0.362482	9.26663e-95	0.35283	8.64067e-14	-0.387064	1	0.544561	1.56383e-40	0.499502	5.17863e-22	NA	NA	0.516822	0.602287	NA	NA	1.64208	1	0.587163	5.76846e-05
CYTH4	0.464498	3.20381e-83	0.865429	1.39183e-17	0.430493	1	NA	NA	NA	NA	NA	NA	NA	NA	NA	NA	NA	NA	NA	NA	NA	NA	NA	NA	-0.351569	1	0.622453	1	NA	NA
CELF2	0.466553	8.00385e-60	NA	NA	0.317707	1	NA	NA	NA	NA	NA	NA	NA	NA	NA	NA	NA	NA	NA	NA	NA	NA	NA	NA	-0.716988	1	0.668495	1	NA	NA
RTN4	0.466621	2.28814e-36	0.627161	3.30208e-06	0.57511	0.199364	NA	NA	NA	NA	NA	NA	NA	NA	NA	NA	NA	NA	NA	NA	NA	NA	NA	NA	NA	NA	-0.512892	1	NA	NA
NAA38	0.466998	7.08074e-69	0.343186	0.0183003	0.874968	0.00197615	NA	NA	NA	NA	NA	NA	NA	NA	NA	NA	NA	NA	NA	NA	NA	NA	NA	NA	-0.321301	1	-1.07182	1	NA	NA
SELENOT	0.468369	2.00268e-65	0.341857	0.083109	0.482679	1	-0.42516	1	NA	NA	NA	NA	NA	NA	NA	NA	NA	NA	NA	NA	0.285653	1	NA	NA	NA	NA	0.383493	1	NA	NA
ATP5PD	0.468671	2.98978e-44	0.289227	1	0.730725	0.000993583	0.302496	1	NA	NA	NA	NA	NA	NA	NA	NA	NA	NA	NA	NA	NA	NA	NA	NA	NA	NA	-0.421377	1	NA	NA
CALM1	0.468854	4.40665e-34	NA	NA	0.372725	1	NA	NA	NA	NA	NA	NA	NA	NA	NA	NA	-0.27657	4.9291e-23	NA	NA	NA	NA	NA	NA	0.882123	0.387951	-0.817084	1	NA	NA
YWHAE	0.469614	1.63908e-50	0.49602	0.000126642	0.675188	0.00972681	NA	NA	NA	NA	NA	NA	NA	NA	NA	NA	NA	NA	NA	NA	0.367725	0.0155434	NA	NA	-0.530231	1	NA	NA	NA	NA
ASPH	0.474201	2.02194e-61	0.613264	2.96072e-08	0.602208	0.0289199	NA	NA	NA	NA	NA	NA	NA	NA	NA	NA	NA	NA	NA	NA	NA	NA	NA	NA	-0.274978	1	NA	NA	NA	NA
OST4	0.474729	1.95456e-46	0.341386	0.599994	0.706421	0.00168387	NA	NA	NA	NA	NA	NA	NA	NA	NA	NA	NA	NA	NA	NA	NA	NA	NA	NA	NA	NA	-0.614099	1	0.474117	1
AHR	0.475622	8.95013e-24	0.880476	9.81816e-08	1.3435	3.21672e-06	NA	NA	NA	NA	NA	NA	NA	NA	NA	NA	NA	NA	NA	NA	NA	NA	NA	NA	-0.280765	1	NA	NA	NA	NA
IFITM3	0.475879	5.47041e-14	1.02592	1.60768e-11	0.884071	1	NA	NA	NA	NA	NA	NA	NA	NA	0.312189	1	0.574493	2.9149e-40	NA	NA	NA	NA	0.423648	1	-0.381516	1	-1.28897	1	NA	NA
MFSD1	0.476347	1.04519e-65	0.698843	4.2431e-13	0.53106	1	NA	NA	NA	NA	NA	NA	NA	NA	NA	NA	NA	NA	NA	NA	NA	NA	NA	NA	NA	NA	-1.61344	1	NA	NA
PTPN6	0.477	4.00923e-66	NA	NA	0.46923	1	NA	NA	NA	NA	NA	NA	NA	NA	NA	NA	NA	NA	NA	NA	NA	NA	NA	NA	-0.879634	0.518814	NA	NA	NA	NA
TRA2B	0.477191	7.18989e-51	0.369513	1	NA	NA	0.315921	1	0.327102	1.64283e-119	NA	NA	NA	NA	NA	NA	NA	NA	NA	NA	NA	NA	NA	NA	NA	NA	-0.876007	1	NA	NA
PHF20L1	0.484355	1.17036e-53	NA	NA	0.251859	1	NA	NA	NA	NA	NA	NA	NA	NA	-0.418202	1	NA	NA	NA	NA	NA	NA	NA	NA	NA	NA	-1.67227	1	0.323201	1
HNRNPU	0.484393	1.92293e-31	0.442982	0.0464556	0.652037	0.266888	NA	NA	NA	NA	NA	NA	NA	NA	-0.300448	1	NA	NA	NA	NA	NA	NA	NA	NA	-0.427729	1	1.03411	1	NA	NA
NDUFS6	0.484635	2.41106e-55	0.417124	0.000618189	0.625934	0.185329	NA	NA	NA	NA	NA	NA	NA	NA	NA	NA	NA	NA	NA	NA	0.253465	1	NA	NA	NA	NA	-0.469523	1	NA	NA
ACSL1	0.485452	3.95097e-18	1.07883	1.43265e-12	1.5293	2.08891e-06	-0.272411	1	NA	NA	NA	NA	NA	NA	NA	NA	NA	NA	NA	NA	NA	NA	0.343213	1	NA	NA	NA	NA	NA	NA
MT-ATP8	0.485802	3.13968e-88	0.360155	0.000269175	0.928344	3.15782e-06	0.281691	1	0.287076	1.13351e-177	0.294517	6.98598e-113	0.278113	2.57098e-27	NA	NA	0.407045	2.79926e-39	0.468353	2.09601e-32	NA	NA	0.304702	1	NA	NA	-0.624734	1	0.559104	0.0402604
CTSZ	0.48581	2.95979e-30	0.679252	5.50328e-08	NA	NA	NA	NA	NA	NA	NA	NA	NA	NA	NA	NA	NA	NA	NA	NA	NA	NA	0.399725	1	-0.385179	1	NA	NA	NA	NA
RAB2A	0.486681	2.71371e-66	0.391383	0.0247535	0.667111	0.262244	NA	NA	NA	NA	NA	NA	NA	NA	NA	NA	NA	NA	NA	NA	NA	NA	NA	NA	NA	NA	-1.08382	1	NA	NA
ARPC1B	0.487036	1.05305e-34	0.477606	0.000261032	NA	NA	NA	NA	NA	NA	NA	NA	NA	NA	NA	NA	NA	NA	NA	NA	NA	NA	NA	NA	NA	NA	-2.52445	1	NA	NA
TRIM38	0.487087	5.87353e-65	NA	NA	NA	NA	NA	NA	NA	NA	NA	NA	NA	NA	-0.264614	1	NA	NA	NA	NA	NA	NA	NA	NA	NA	NA	1.76888	1	NA	NA
ACTB	0.487109	8.44884e-20	0.56343	0.00889268	0.308821	1	NA	NA	-0.272079	2.53302e-89	-0.266464	8.75206e-32	NA	NA	NA	NA	-0.25941	5.02084e-16	NA	NA	-0.480492	1	-0.528796	0.0258566	-0.26185	1	-2.44378	1	-0.333582	1
RAB32	0.487893	1.31645e-68	0.335184	0.0280882	0.787606	0.000246577	NA	NA	NA	NA	NA	NA	NA	NA	NA	NA	NA	NA	NA	NA	NA	NA	NA	NA	-0.395947	1	-2.82643	1	NA	NA
COPS9	0.4911	1.12289e-65	0.654695	5.78224e-09	0.578311	0.0316702	0.258791	1	NA	NA	NA	NA	NA	NA	0.437507	0.299134	NA	NA	NA	NA	NA	NA	NA	NA	NA	NA	-0.667827	1	NA	NA
PKM	0.492024	1.0017e-29	0.757237	5.88998e-08	1.36093	4.03392e-10	NA	NA	NA	NA	NA	NA	NA	NA	NA	NA	NA	NA	NA	NA	NA	NA	NA	NA	NA	NA	-2.29852	1	NA	NA
PRDX5	0.49356	1.37136e-51	NA	NA	0.639588	0.0191295	-0.257463	1	NA	NA	NA	NA	NA	NA	NA	NA	NA	NA	NA	NA	NA	NA	NA	NA	NA	NA	NA	NA	NA	NA
IRF1	0.494136	6.93063e-56	NA	NA	0.324593	1	NA	NA	NA	NA	NA	NA	-0.361396	5.99529e-14	-0.787304	1.42791e-05	-0.332566	2.15442e-20	0.258556	1	NA	NA	NA	NA	0.475725	1	1.15665	1	-0.314914	1
SNX10	0.498389	3.40557e-47	0.550755	0.0797232	0.818853	0.00398772	NA	NA	NA	NA	NA	NA	NA	NA	NA	NA	NA	NA	NA	NA	NA	NA	NA	NA	-0.273219	1	NA	NA	NA	NA
PSMB8	0.498749	5.24927e-62	0.299646	1	0.77627	0.00191873	NA	NA	NA	NA	NA	NA	NA	NA	NA	NA	NA	NA	NA	NA	NA	NA	NA	NA	NA	NA	-0.69148	1	-0.386166	1
PTP4A2	0.502454	1.57503e-37	NA	NA	NA	NA	0.339322	1	NA	NA	NA	NA	NA	NA	NA	NA	NA	NA	NA	NA	0.446886	0.000253878	NA	NA	NA	NA	-2.80354	1	NA	NA
BLOC1S6	0.503204	1.57775e-43	0.379215	0.000293861	0.469985	1	NA	NA	NA	NA	NA	NA	NA	NA	-0.351304	1	NA	NA	NA	NA	0.266289	1	0.315251	1	NA	NA	1.52228	1	NA	NA
CAST	0.50342	2.91032e-38	0.600251	2.06988e-05	0.593404	1	NA	NA	NA	NA	NA	NA	NA	NA	NA	NA	NA	NA	NA	NA	NA	NA	NA	NA	-0.40215	1	1.11102	1	NA	NA
TGOLN2	0.511011	2.46985e-55	NA	NA	0.427319	1	NA	NA	NA	NA	NA	NA	NA	NA	-0.328151	1	NA	NA	NA	NA	NA	NA	NA	NA	NA	NA	-1.11333	1	0.306234	1
MT-ND3	0.512383	1.22923e-43	0.585894	0.000179205	0.832303	0.00162767	0.779812	0.00747071	0.312805	4.02014e-199	NA	NA	0.30922	1.55007e-18	-0.870582	5.03793e-08	0.485655	4.31185e-49	0.410626	1.19759e-18	NA	NA	0.513984	0.507879	-0.289153	1	1.32088	1	0.525345	2.02648e-07
ZNHIT1	0.513736	1.34476e-67	0.472985	0.00769606	0.738354	0.00848471	NA	NA	NA	NA	NA	NA	NA	NA	NA	NA	NA	NA	NA	NA	NA	NA	NA	NA	NA	NA	-0.915801	1	NA	NA
DIAPH1	0.516742	2.00488e-52	0.432833	1	0.590454	1	NA	NA	NA	NA	NA	NA	NA	NA	-0.432089	1	NA	NA	NA	NA	NA	NA	NA	NA	NA	NA	0.485201	1	NA	NA
FERMT3	0.517547	4.47558e-55	0.956843	6.84997e-16	0.637516	0.486759	-0.494347	1	NA	NA	NA	NA	NA	NA	-0.312045	1	NA	NA	NA	NA	NA	NA	NA	NA	-0.273319	1	-2.19295	1	NA	NA
RC3H1	0.517933	7.6311e-88	0.384586	1.02058e-08	0.484566	1	NA	NA	NA	NA	NA	NA	NA	NA	NA	NA	NA	NA	NA	NA	NA	NA	0.340311	0.798379	-0.250625	1	NA	NA	0.266832	1
RIOK3	0.518146	5.94159e-60	0.380877	1	0.250546	1	NA	NA	NA	NA	NA	NA	NA	NA	NA	NA	0.266529	4.41151e-21	NA	NA	0.364338	0.111475	NA	NA	NA	NA	-0.639418	1	NA	NA
CTSA	0.519195	2.75683e-68	0.92948	9.25389e-19	1.09155	3.87812e-06	NA	NA	NA	NA	NA	NA	NA	NA	NA	NA	NA	NA	NA	NA	NA	NA	NA	NA	NA	NA	-1.53301	1	NA	NA
VTI1B	0.520045	1.67125e-93	0.495675	0.00623294	0.560819	0.0109019	-0.255455	1	NA	NA	NA	NA	NA	NA	NA	NA	NA	NA	NA	NA	NA	NA	NA	NA	NA	NA	NA	NA	NA	NA
ZYX	0.520384	2.30954e-47	0.846731	7.83885e-10	0.866934	0.00332893	NA	NA	NA	NA	NA	NA	NA	NA	NA	NA	NA	NA	NA	NA	NA	NA	NA	NA	-0.390213	1	-0.52724	1	NA	NA
CSK	0.52145	2.03171e-80	0.524393	0.000306938	0.638303	1	NA	NA	NA	NA	NA	NA	NA	NA	NA	NA	NA	NA	NA	NA	NA	NA	NA	NA	NA	NA	-1.01317	1	0.441307	1
MYL6	0.522546	1.23724e-44	0.561506	1.35867e-09	0.326731	1	NA	NA	NA	NA	NA	NA	NA	NA	NA	NA	NA	NA	NA	NA	NA	NA	NA	NA	NA	NA	-1.76225	1	NA	NA
BNIP2	0.52267	2.13583e-47	0.51824	0.00020178	0.489462	1	NA	NA	NA	NA	NA	NA	NA	NA	NA	NA	NA	NA	NA	NA	NA	NA	NA	NA	NA	NA	-1.30539	1	NA	NA
PTGES3	0.523655	5.96626e-71	0.356879	1	0.483958	1	NA	NA	NA	NA	NA	NA	NA	NA	NA	NA	NA	NA	NA	NA	NA	NA	NA	NA	NA	NA	-1.15542	1	-0.339477	1
MYO1F	0.527553	2.01304e-62	0.356306	0.00491265	0.970419	0.0168294	NA	NA	NA	NA	-0.283333	1.16443e-23	-0.254479	1.39422e-09	-0.30059	1	NA	NA	NA	NA	NA	NA	NA	NA	NA	NA	NA	NA	-0.530137	1
TMCO1	0.532259	7.93614e-71	0.72709	2.41154e-10	0.825844	9.68836e-05	0.405866	1	NA	NA	NA	NA	NA	NA	NA	NA	NA	NA	NA	NA	NA	NA	NA	NA	-0.262183	1	NA	NA	NA	NA
CALM3	0.538431	4.09317e-60	0.78763	2.29542e-09	0.693346	0.082573	0.327852	1	NA	NA	NA	NA	NA	NA	NA	NA	NA	NA	NA	NA	NA	NA	NA	NA	NA	NA	-1.0464	1	NA	NA
SYK	0.53907	6.11831e-60	0.321857	1.92278e-06	0.692073	0.0184739	NA	NA	NA	NA	NA	NA	NA	NA	NA	NA	NA	NA	NA	NA	NA	NA	NA	NA	-0.413868	1	NA	NA	NA	NA
H2AZ1	0.540509	1.08132e-127	0.594498	6.87419e-15	0.427154	1	0.64103	1	0.258391	1.10351e-44	NA	NA	NA	NA	-0.393854	1	NA	NA	0.319912	0.00113313	0.470592	1	0.73204	0.0193734	0.750439	1	-1.33475	1	-0.392438	1
ATP6V0E1	0.542629	1.59838e-52	0.570149	5.60476e-06	0.526606	1	NA	NA	NA	NA	NA	NA	NA	NA	NA	NA	NA	NA	NA	NA	NA	NA	NA	NA	NA	NA	-3.49674	1	NA	NA
CEBPD	0.545197	3.25882e-39	-0.270016	1	NA	NA	NA	NA	NA	NA	NA	NA	NA	NA	0.417746	1	0.382651	4.78309e-18	NA	NA	NA	NA	0.664722	0.877186	NA	NA	NA	NA	NA	NA
RPL38	0.546404	3.29751e-48	0.255672	1	0.406165	0.751198	0.529054	0.285927	0.331151	1.03158e-288	0.397578	1.15084e-136	NA	NA	NA	NA	0.301504	1.62924e-21	0.449079	1.16693e-34	NA	NA	0.27033	1	0.336964	1	-0.528022	1	NA	NA
[truncated: 2,506 more rows]

## Sheet: Table S3C - Day7v28
Gene	CD14 Monos_avg_log2FC	CD14 Monos_p_val_adj	CD16 Monos_avg_log2FC	CD16 Monos_p_val_adj	cDCs_avg_log2FC	cDCs_p_val_adj	pDCs_avg_log2FC	pDCs_p_val_adj	CD4 T_avg_log2FC	CD4 T_p_val_adj	CD8 T_avg_log2FC	CD8 T_p_val_adj	GDT_avg_log2FC	GDT_p_val_adj	NKT_avg_log2FC	NKT_p_val_adj	NK_avg_log2FC	NK_p_val_adj	B cells_avg_log2FC	B cells_p_val_adj	Plasma_avg_log2FC	Plasma_p_val_adj	Proliferating_avg_log2FC	Proliferating_p_val_adj	HSPCs_avg_log2FC	HSPCs_p_val_adj	Platelets_avg_log2FC	Platelets_p_val_adj	Unknown_avg_log2FC	Unknown_p_val_adj
[truncated: 1,744 more rows]

[truncated: 2 more sheets: Table S3D - Day28vControl, Table S3E - No. of DEGs]
