# Supplementary material for: Malaria drives unique regulatory responses across multiple immune cell subsets
Source: bioRxiv preprint, doi:10.1101/2022.11.16.516822, version 1 (2022-11-17)
Supplement: Supplementary Table S8 [file 516822_file09.xlsx]

## Sheet: Supplementary Table S7 CD4 clus
	p_val	avg_log2FC	pct.1	pct.2	p_val_adj	cluster	gene
GZMK	0	3.2155	0.826	0.057	0	Th1 cells	GZMK
GZMK.1	0	3.08347	0.78	0.058	0	Tr1 cells	GZMK
LAG3.1	0	3.03977	0.597	0.026	0	Tr1 cells	LAG3
CCL5.3	0	3.00966	0.53	0.087	0	Th1 cells	CCL5
GZMA.2	0	2.94932	0.721	0.059	0	Tr1 cells	GZMA
NKG7	0	2.81541	0.619	0.058	0	Th1 cells	NKG7
GZMA.1	0	2.55568	0.619	0.061	0	Th1 cells	GZMA
CST7.6	0	2.54579	0.888	0.141	0	Tr1 cells	CST7
NKG7.1	0	2.30989	0.501	0.06	0	Tr1 cells	NKG7
CCL5.4	0	2.27977	0.688	0.084	0	Tr1 cells	CCL5
CCL4.1	3.195e-216	2.15019	0.343	0.063	6.26508e-212	Tr1 cells	CCL4
PTMS.1	0	2.13605	0.549	0.025	0	Tr1 cells	PTMS
LMNA.4	0	2.10299	0.872	0.238	0	Th2 cells	LMNA
METRNL.5	0	2.09248	0.683	0.099	0	Tr1 cells	METRNL
CD74.5	0	2.07839	0.915	0.464	0	Tr1 cells	CD74
MAF.7	0	2.07283	0.836	0.207	0	Tr1 cells	MAF
CD74.4	0	2.00349	0.936	0.464	0	Th1 cells	CD74
ACTG1.2	1.89314e-287	1.90413	0.987	0.956	3.71225e-283	Th1 cells	ACTG1
IL32.6	2.15826e-277	1.89502	0.98	0.8	4.23212e-273	Tr1 cells	IL32
CST7.5	0	1.84561	0.743	0.143	0	Th1 cells	CST7
KLRB1.5	0	1.7772	0.704	0.177	0	Th17 cells	KLRB1
TNFRSF1B.5	1.29477e-295	1.77579	0.775	0.285	2.53892e-291	Tr1 cells	TNFRSF1B
HLA-DRA.2	0	1.71821	0.569	0.072	0	Th1 cells	HLA-DRA
GNLY	1.66874e-27	1.6553	0.119	0.041	3.27223e-23	Th1 cells	GNLY
CLIC1.5	4.95584e-302	1.65069	0.86	0.371	9.71791e-298	Th1 cells	CLIC1
S100A4.4	0	1.63514	0.995	0.575	0	Th17 cells	S100A4
CD8B	0	1.60279	0.534	0.033	0	Th1 cells	CD8B
ACTB.5	3.03035e-279	1.58767	0.997	0.981	5.94222e-275	Th1 cells	ACTB
S100A4.5	0	1.58443	0.953	0.592	0	Tf regulatory cells	S100A4
RNF19A.7	4.26539e-254	1.58252	0.857	0.398	8.364e-250	Tr1 cells	RNF19A
DUSP2.6	4.27806e-233	1.5819	0.928	0.555	8.38886e-229	Tr1 cells	DUSP2
S100A4.3	0	1.57555	0.976	0.555	0	Th2 cells	S100A4
IL32.4	0	1.55352	0.972	0.797	0	Tf regulatory cells	IL32
LGALS1.4	0	1.52623	0.574	0.14	0	Th2 cells	LGALS1
YBX3.3	0	1.52045	0.713	0.158	0	Th1 cells	YBX3
PFN1.6	4.60348e-272	1.51961	0.995	0.915	9.02697e-268	Th1 cells	PFN1
COTL1.6	1.4006e-240	1.51698	0.922	0.558	2.74644e-236	Th1 cells	COTL1
ANXA1.4	0	1.50257	0.972	0.588	0	Th2 cells	ANXA1
CCL4	2.57837e-58	1.48442	0.21	0.065	5.05592e-54	Th1 cells	CCL4
RNF19A.6	1.14373e-283	1.48062	0.894	0.397	2.24273e-279	Th1 cells	RNF19A
HLA-DQB1.3	0	1.44835	0.483	0.08	0	Tf regulatory cells	HLA-DQB1
CD4	3.55968e-182	1.44185	0.684	0.309	6.98017e-178	Tr1 cells	CD4
ISG20.4	2.82939e-241	1.42986	0.948	0.622	5.54814e-237	Th1 cells	ISG20
METRNL.4	0	1.42645	0.619	0.1	0	Th1 cells	METRNL
C12orf75.6	0	1.41332	0.656	0.153	0	Tr1 cells	C12orf75
CD27.3	4.56068e-246	1.41274	0.795	0.333	8.94304e-242	Th1 cells	CD27
CTLA4.6	0	1.41226	0.58	0.114	0	Tr1 cells	CTLA4
LAIR2.3	0	1.41153	0.467	0.055	0	Tr1 cells	LAIR2
MT2A.2	1.39277e-180	1.39731	0.748	0.323	2.73109e-176	Th1 cells	MT2A
LYAR.3	0	1.39724	0.712	0.168	0	Th1 cells	LYAR
LGALS3.6	0	1.39714	0.479	0.086	0	Tf regulatory cells	LGALS3
LGALS3.7	0	1.39341	0.543	0.092	0	Th1 cells	LGALS3
DUSP4.3	0	1.39125	0.471	0.081	0	Tf regulatory cells	DUSP4
SLBP.1	1.5837e-175	1.38491	0.673	0.293	3.10548e-171	Tr1 cells	SLBP
LMNA.6	0	1.38201	0.719	0.298	0	Tf regulatory cells	LMNA
TNFRSF4.4	0	1.38026	0.64	0.139	0	Th17 cells	TNFRSF4
HLA-DRB1.2	0	1.37922	0.472	0.079	0	Tf regulatory cells	HLA-DRB1
GAPDH.7	5.30829e-180	1.36941	0.962	0.874	1.0409e-175	Th1 cells	GAPDH
CD81.3	6.22941e-231	1.36783	0.885	0.525	1.22152e-226	Tr1 cells	CD81
FGFBP2	0	1.36216	0.338	0.019	0	Th1 cells	FGFBP2
ITGB1.4	0	1.3604	0.823	0.304	0	Th2 cells	ITGB1
NUCB2.4	3.94426e-172	1.35653	0.79	0.403	7.73429e-168	Th1 cells	NUCB2
ARPC2.6	2.28002e-281	1.35368	0.982	0.836	4.4709e-277	Th1 cells	ARPC2
LGALS1.7	1.67616e-83	1.35227	0.445	0.186	3.28679e-79	Th1 cells	LGALS1
HCST.2	1.54513e-176	1.35097	0.888	0.636	3.02984e-172	Tr1 cells	HCST
PMAIP1.2	1.49366e-207	1.34672	0.649	0.211	2.92893e-203	Th1 cells	PMAIP1
S100A11.3	0	1.34096	0.886	0.424	0	Th2 cells	S100A11
KLRB1.7	2.34692e-84	1.33608	0.484	0.21	4.60208e-80	Tr1 cells	KLRB1
HLA-DPB1.5	3.25242e-247	1.33488	0.683	0.218	6.37767e-243	Th1 cells	HLA-DPB1
TUBA4A.5	3.38903e-181	1.32474	0.864	0.49	6.64554e-177	Tr1 cells	TUBA4A
RGS1.3	7.1266e-227	1.32259	0.794	0.49	1.39746e-222	Tf regulatory cells	RGS1
ATP1B3.6	4.61407e-164	1.3138	0.807	0.431	9.04772e-160	Tr1 cells	ATP1B3
HCST.1	2.01775e-239	1.29812	0.944	0.635	3.9566e-235	Th1 cells	HCST
F2R.1	0	1.29356	0.463	0.02	0	Tr1 cells	F2R
SRGN.6	5.22228e-258	1.28721	0.999	0.956	1.02404e-253	Tr1 cells	SRGN
LGALS1.6	1.24004e-177	1.28692	0.449	0.182	2.43159e-173	Tf regulatory cells	LGALS1
TENT5C.5	1.7341e-238	1.28004	0.844	0.38	3.40039e-234	Tr1 cells	TENT5C
MYL6.7	4.12829e-245	1.27008	0.985	0.886	8.09516e-241	Tr1 cells	MYL6
MYL6.6	1.44281e-242	1.2696	0.994	0.886	2.8292e-238	Th1 cells	MYL6
LYST	0	1.26512	0.749	0.206	0	Th1 cells	LYST
PTPN7.2	2.27543e-212	1.24497	0.688	0.257	4.46188e-208	Tr1 cells	PTPN7
CLIC1.6	3.88176e-159	1.24304	0.741	0.373	7.61174e-155	Tr1 cells	CLIC1
RGS1.1	1.27589e-127	1.2355	0.781	0.495	2.50189e-123	T regulatory cells	RGS1
PPP1CA.4	6.95348e-247	1.23501	0.81	0.338	1.36351e-242	Th1 cells	PPP1CA
BRD7	6.96878e-170	1.23414	0.752	0.342	1.36651e-165	Th1 cells	BRD7
DUSP4.5	0	1.22135	0.5	0.088	0	Tr1 cells	DUSP4
RTKN2	0	1.22046	0.406	0.043	0	T regulatory cells	RTKN2
S100A11.4	0	1.2193	0.902	0.446	0	Th17 cells	S100A11
CD74.3	1.64333e-209	1.21818	0.735	0.463	3.22241e-205	Tf regulatory cells	CD74
HLA-DPB1.4	1.49876e-295	1.21021	0.559	0.214	2.93893e-291	Tf regulatory cells	HLA-DPB1
CD81.2	1.00624e-178	1.20984	0.884	0.525	1.97313e-174	Th1 cells	CD81
PLEKHO1.3	1.75484e-219	1.20739	0.625	0.204	3.44106e-215	Tr1 cells	PLEKHO1
S100A10.4	0	1.20474	0.968	0.779	0	Tf regulatory cells	S100A10
ISG15.2	4.82635e-128	1.20333	0.775	0.423	9.46398e-124	Th1 cells	ISG15
ARPC1B.8	8.48549e-167	1.20312	0.796	0.461	1.66392e-162	Tr1 cells	ARPC1B
CCR6.3	0	1.20101	0.593	0.068	0	Th17 cells	CCR6
TMSB4X.5	0	1.20084	1	1	0	Th1 cells	TMSB4X
S100A10.2	0	1.19964	0.98	0.759	0	Th2 cells	S100A10
CORO1A.2	1.96667e-197	1.19777	0.952	0.815	3.85645e-193	Th1 cells	CORO1A
ARPC1B.7	9.42923e-166	1.19632	0.823	0.46	1.84898e-161	Th1 cells	ARPC1B
PGM2L1.2	6.46192e-123	1.19444	0.622	0.274	1.26712e-118	Th1 cells	PGM2L1
RAC2.2	5.87052e-216	1.19001	0.938	0.649	1.15115e-211	Th1 cells	RAC2
SH2D1A	1.46582e-268	1.18946	0.784	0.268	2.87433e-264	Th1 cells	SH2D1A
UBC.6	5.62772e-263	1.17967	0.997	0.979	1.10354e-258	Tr1 cells	UBC
GZMB	1.21127e-93	1.17086	0.114	0.016	2.37519e-89	Th1 cells	GZMB
LAG3	4.96111e-191	1.16923	0.229	0.032	9.72823e-187	Th1 cells	LAG3
ARPC3.3	8.70923e-240	1.16209	0.965	0.82	1.70779e-235	Th1 cells	ARPC3
MXD4.2	2.35579e-220	1.15882	0.794	0.341	4.61947e-216	Th1 cells	MXD4
GAPDH.8	1.612e-206	1.15743	0.98	0.874	3.16096e-202	Tr1 cells	GAPDH
CYBA.7	1.71854e-189	1.14878	0.959	0.817	3.36989e-185	Tr1 cells	CYBA
SNX9.2	9.13407e-119	1.14759	0.632	0.327	1.7911e-114	Tr1 cells	SNX9
CD8A	0	1.13862	0.312	0.023	0	Th1 cells	CD8A
MCL1.5	1.20293e-147	1.13727	0.892	0.679	2.35884e-143	Tr1 cells	MCL1
HLA-DRA.1	0	1.13717	0.357	0.071	0	Tf regulatory cells	HLA-DRA
PDCD1	0	1.13656	0.475	0.048	0	Tr1 cells	PDCD1
GMFG.2	4.57466e-219	1.13603	0.977	0.844	8.97045e-215	Th1 cells	GMFG
CLDND1.3	1.42996e-192	1.13464	0.722	0.286	2.80401e-188	Th1 cells	CLDND1
PSMB9.3	6.6933e-198	1.12903	0.836	0.436	1.31249e-193	Th1 cells	PSMB9
RUNX3.6	2.1151e-185	1.12834	0.725	0.301	4.1475e-181	Tr1 cells	RUNX3
IL2RA.1	0	1.1273	0.385	0.051	0	Tf regulatory cells	IL2RA
GZMH	2.06983e-252	1.12242	0.171	0.014	4.05872e-248	Th1 cells	GZMH
CXCR3.1	0	1.12078	0.463	0.053	0	Tr1 cells	CXCR3
HAVCR2.1	0	1.11977	0.395	0.019	0	Tr1 cells	HAVCR2
PFN1.7	7.81244e-212	1.11779	0.991	0.915	1.53194e-207	Tr1 cells	PFN1
IL32.5	5.15691e-100	1.11347	0.932	0.801	1.01122e-95	Th1 cells	IL32
FRMD4B.3	2.11157e-288	1.11325	0.465	0.088	4.14059e-284	Tr1 cells	FRMD4B
LCP1.5	6.15202e-164	1.11027	0.821	0.467	1.20635e-159	Th1 cells	LCP1
ARPC5.1	7.69893e-185	1.10977	0.803	0.404	1.50968e-180	Th1 cells	ARPC5
LMNA.5	0	1.10669	0.756	0.279	0	Th17 cells	LMNA
ITGB1.6	5.30956e-258	1.10498	0.718	0.352	1.04115e-253	Tf regulatory cells	ITGB1
S100A4.7	1.32941e-131	1.10356	0.913	0.599	2.60683e-127	Tr1 cells	S100A4
PASK.2	0	1.10223	0.66	0.255	0	Tfh cells	PASK
MXD4.3	2.06505e-150	1.09839	0.697	0.342	4.04936e-146	Tr1 cells	MXD4
IL2RA	0	1.09817	0.389	0.056	0	T regulatory cells	IL2RA
ABHD17A.2	4.91014e-146	1.09796	0.791	0.491	9.62829e-142	Tr1 cells	ABHD17A
TIGIT.4	0	1.09598	0.405	0.075	0	Tf regulatory cells	TIGIT
ANXA2.5	0	1.09419	0.582	0.211	0	Tf regulatory cells	ANXA2
CD38	0	1.09276	0.543	0.046	0	Th1 cells	CD38
CD99.6	2.08904e-182	1.09141	0.921	0.629	4.09641e-178	Th1 cells	CD99
CXCR6	0	1.09041	0.352	0.011	0	Tr1 cells	CXCR6
SYNE2.6	5.17214e-119	1.09024	0.818	0.475	1.0142e-114	Th1 cells	SYNE2
CTLA4.4	0	1.08929	0.476	0.109	0	Tf regulatory cells	CTLA4
HLA-DPA1.3	5.10198e-274	1.08923	0.483	0.168	1.00045e-269	Tf regulatory cells	HLA-DPA1
HLA-A.6	3.47571e-299	1.08741	1	0.994	6.81552e-295	Tr1 cells	HLA-A
TGFB1.7	5.03084e-158	1.08553	0.868	0.548	9.86497e-154	Tr1 cells	TGFB1
HPGD	6.95683e-265	1.08546	0.294	0.068	1.36416e-260	Tf regulatory cells	HPGD
SAMSN1.8	7.81541e-153	1.08365	0.869	0.522	1.53252e-148	Tr1 cells	SAMSN1
MT-CO1.2	3.60262e-243	1.08247	0.999	0.996	7.06439e-239	Th1 cells	MT-CO1
HSPE1.1	2.01548e-106	1.08126	0.807	0.573	3.95215e-102	Tr1 cells	HSPE1
S100A11.6	1.55915e-125	1.07232	0.839	0.472	3.05733e-121	Tr1 cells	S100A11
RGS1.4	1.20377e-115	1.07179	0.804	0.495	2.36047e-111	Tr1 cells	RGS1
UCP2.2	1.01121e-152	1.06806	0.814	0.459	1.98289e-148	Th1 cells	UCP2
ZFP36.5	1.50385e-134	1.06531	0.979	0.838	2.9489e-130	Tr1 cells	ZFP36
CD52.8	6.28864e-175	1.062	0.984	0.927	1.23314e-170	Tr1 cells	CD52
SLA.3	2.49092e-159	1.05399	0.687	0.296	4.88445e-155	Tr1 cells	SLA
HLA-DRB1.3	2.09175e-269	1.05165	0.452	0.087	4.10172e-265	Th1 cells	HLA-DRB1
RTKN2.1	0	1.0458	0.306	0.041	0	Tf regulatory cells	RTKN2
BHLHE40.5	1.14967e-172	1.0457	0.545	0.174	2.25439e-168	Tr1 cells	BHLHE40
MAP3K8.3	2.73867e-159	1.04278	0.4	0.105	5.37027e-155	Tr1 cells	MAP3K8
HLA-DPA1.4	1.87168e-177	1.04086	0.547	0.172	3.67018e-173	Th1 cells	HLA-DPA1
BCL2L11.2	2.69306e-225	1.04018	0.555	0.15	5.28083e-221	Tr1 cells	BCL2L11
CNN2.3	2.17667e-166	1.03682	0.855	0.505	4.26822e-162	Th1 cells	CNN2
PTPN7.1	5.94862e-196	1.03556	0.699	0.257	1.16647e-191	Th1 cells	PTPN7
S1PR4.5	3.00034e-162	1.03524	0.779	0.385	5.88337e-158	Th1 cells	S1PR4
GBP5.2	2.35848e-211	1.03357	0.498	0.205	4.62474e-207	Tf regulatory cells	GBP5
GBP2.1	5.82584e-184	1.0331	0.791	0.356	1.14239e-179	Th1 cells	GBP2
ANXA2.6	1.66928e-157	1.02666	0.603	0.217	3.2733e-153	Th1 cells	ANXA2
VIM.3	0	1.01838	0.991	0.927	0	Th2 cells	VIM
CFL1.6	4.71628e-187	1.01786	0.991	0.929	9.24816e-183	Th1 cells	CFL1
PLIN2.4	1.85586e-145	1.01217	0.593	0.23	3.63916e-141	Tr1 cells	PLIN2
RILPL2.3	0	1.01153	0.75	0.422	0	Tfh cells	RILPL2
HLA-DRA.3	1.77735e-139	1.0113	0.324	0.076	3.48521e-135	Tr1 cells	HLA-DRA
MSN.4	7.26534e-173	1.01127	0.83	0.445	1.42466e-168	Th1 cells	MSN
RGS2.2	8.14654e-122	1.00977	0.551	0.213	1.59746e-117	Th1 cells	RGS2
CEMIP2.2	3.90769e-155	1.00868	0.83	0.425	7.66259e-151	Th1 cells	CEMIP2
CREM.4	6.45501e-135	1.00743	0.973	0.833	1.26576e-130	Tr1 cells	CREM
SAMSN1.4	0	1.00687	0.87	0.483	0	Th2 cells	SAMSN1
RUNX3.5	1.02869e-205	1.00143	0.779	0.3	2.01716e-201	Th1 cells	RUNX3
ID1.3	1.22097e-113	1.00142	0.343	0.097	2.3942e-109	Tr1 cells	ID1
ARHGDIB.2	7.88769e-233	1.00001	0.999	0.959	1.5467e-228	Th1 cells	ARHGDIB
AUTS2.4	1.01452e-297	0.998829	0.447	0.078	1.98936e-293	Tr1 cells	AUTS2
S100A10.5	2.34815e-119	0.99793	0.956	0.782	4.60449e-115	Th1 cells	S100A10
HLA-DQB1.4	4.11254e-295	0.997761	0.478	0.087	8.06428e-291	Th1 cells	HLA-DQB1
HSPH1.1	2.27328e-114	0.996012	0.745	0.381	4.45767e-110	Th1 cells	HSPH1
ARID5B.4	1.70347e-219	0.992987	0.799	0.52	3.34033e-215	Tf regulatory cells	ARID5B
CD99.7	7.21847e-152	0.99224	0.899	0.63	1.41547e-147	Tr1 cells	CD99
TIGIT.5	7.51067e-302	0.990179	0.457	0.08	1.47277e-297	Th1 cells	TIGIT
GZMM.4	3.40111e-123	0.989728	0.816	0.504	6.66924e-119	Tr1 cells	GZMM
VIM.4	0	0.989433	0.995	0.93	0	Th17 cells	VIM
CNN2.4	4.139e-125	0.98887	0.817	0.506	8.11616e-121	Tr1 cells	CNN2
CLDND1.4	2.57416e-111	0.988682	0.612	0.288	5.04768e-107	Tr1 cells	CLDND1
DUSP5.3	2.83362e-181	0.987705	0.577	0.191	5.55644e-177	Tr1 cells	DUSP5
CD3D.3	4.12005e-148	0.984296	0.959	0.87	8.079e-144	Tr1 cells	CD3D
OAZ1.5	5.29573e-191	0.984018	0.981	0.886	1.03844e-186	Tr1 cells	OAZ1
SLC7A5.3	8.85472e-202	0.980668	0.496	0.134	1.73632e-197	Tr1 cells	SLC7A5
WIPF1.2	4.39386e-179	0.976241	0.827	0.404	8.61593e-175	Th1 cells	WIPF1
HNRNPLL.1	0	0.97601	0.481	0.085	0	Tr1 cells	HNRNPLL
SYNE2.5	4.73833e-165	0.975966	0.724	0.472	9.29139e-161	Tf regulatory cells	SYNE2
IL2RG.6	1.2032e-128	0.975644	0.808	0.519	2.35936e-124	Tr1 cells	IL2RG
DNAJB6.3	8.04155e-128	0.971408	0.859	0.616	1.57687e-123	Tr1 cells	DNAJB6
PMAIP1.1	5.51253e-148	0.968233	0.46	0.209	1.08095e-143	Tf regulatory cells	PMAIP1
SLC5A3	5.27661e-255	0.967317	0.562	0.136	1.03469e-250	Th1 cells	SLC5A3
FOXP3.1	0	0.965134	0.34	0.01	0	Tf regulatory cells	FOXP3
PTPN22.1	9.34262e-238	0.962657	0.696	0.214	1.832e-233	Th1 cells	PTPN22
APOBEC3G	7.86582e-298	0.959878	0.486	0.092	1.54241e-293	Th1 cells	APOBEC3G
TRAPPC1.2	1.53858e-189	0.959126	0.766	0.335	3.017e-185	Th1 cells	TRAPPC1
FOS.1	0	0.957945	0.914	0.777	0	Activated CD4 T cells	FOS
ARID5B.6	2.94038e-110	0.956128	0.821	0.525	5.7658e-106	Tr1 cells	ARID5B
AQP3.4	0	0.954633	0.765	0.358	0	Th17 cells	AQP3
NIBAN1.3	3.97023e-300	0.954207	0.344	0.081	7.78522e-296	Tf regulatory cells	NIBAN1
PBXIP1.4	1.2634e-106	0.953405	0.748	0.451	2.4774e-102	Tr1 cells	PBXIP1
ENC1	0	0.951197	0.397	0.041	0	Th1 cells	ENC1
CAP1.2	1.38428e-161	0.949218	0.774	0.368	2.71443e-157	Th1 cells	CAP1
TENT5C.4	3.9493e-221	0.948482	0.694	0.377	7.74419e-217	Tf regulatory cells	TENT5C
FLNA.6	3.95707e-159	0.947787	0.742	0.323	7.75942e-155	Th1 cells	FLNA
PSMB8.1	8.5984e-150	0.946701	0.814	0.468	1.68606e-145	Th1 cells	PSMB8
ITGB2.3	3.5389e-119	0.945927	0.808	0.534	6.93942e-115	Tr1 cells	ITGB2
ANXA2.3	0	0.945273	0.591	0.175	0	Th2 cells	ANXA2
SH3BGRL3.6	7.3687e-302	0.944874	0.987	0.897	1.44493e-297	Tf regulatory cells	SH3BGRL3
SOX4	0	0.944574	0.19	0.047	0	Naive CD4 T cells	SOX4
GLRX	2.02234e-156	0.944078	0.42	0.178	3.96561e-152	Tf regulatory cells	GLRX
FABP5	0	0.943893	0.561	0.103	0	Th1 cells	FABP5
AHNAK.6	1.23547e-204	0.942879	0.739	0.414	2.42263e-200	Tf regulatory cells	AHNAK
UCP2.3	2.02704e-53	0.942533	0.64	0.462	3.97482e-49	Tr1 cells	UCP2
IL10.1	0	0.942273	0.224	0.004	0	Tr1 cells	IL10
PPP1R18.1	1.19597e-255	0.940927	0.623	0.169	2.34517e-251	Th1 cells	PPP1R18
SH3BGRL3.7	9.51382e-184	0.940527	0.994	0.899	1.86557e-179	Th1 cells	SH3BGRL3
N4BP1	9.77467e-157	0.939372	0.786	0.374	1.91672e-152	Th1 cells	N4BP1
MRPS6	1.79652e-169	0.938168	0.623	0.219	3.5228e-165	Th1 cells	MRPS6
RORA.3	0	0.937785	0.862	0.504	0	Th17 cells	RORA
AHNAK.4	0	0.937405	0.783	0.378	0	Th2 cells	AHNAK
PPM1G.1	2.50822e-188	0.93726	0.758	0.319	4.91837e-184	Th1 cells	PPM1G
IL2RB.2	2.8766e-211	0.936857	0.519	0.139	5.64072e-207	Tr1 cells	IL2RB
CXCR3	0	0.935641	0.478	0.053	0	Th1 cells	CXCR3
TNFRSF1B.4	1.50709e-122	0.933878	0.643	0.287	2.95526e-118	Th1 cells	TNFRSF1B
SELPLG.1	2.61169e-201	0.932031	0.674	0.229	5.12126e-197	Th1 cells	SELPLG
EFHD2.5	3.89004e-122	0.931565	0.555	0.233	7.62799e-118	Tr1 cells	EFHD2
CD59.1	5.48011e-154	0.93114	0.487	0.155	1.0746e-149	Tr1 cells	CD59
NEAT1.5	8.05361e-14	0.930768	0.307	0.25	1.57923e-09	Tf regulatory cells	NEAT1
SH3BGRL3.4	0	0.930418	0.994	0.888	0	Th2 cells	SH3BGRL3
ARPC2.7	2.02701e-166	0.929917	0.959	0.836	3.97476e-162	Tr1 cells	ARPC2
WIPF1.3	5.72501e-141	0.929333	0.753	0.405	1.12262e-136	Tr1 cells	WIPF1
SLFN5.2	3.68952e-139	0.929269	0.747	0.344	7.23479e-135	Th1 cells	SLFN5
EML4.6	7.08923e-128	0.929257	0.855	0.566	1.39013e-123	Tr1 cells	EML4
KLRB1.3	0	0.926339	0.453	0.162	0	Tfh cells	KLRB1
TIMP1.4	0	0.925322	0.654	0.244	0	Th17 cells	TIMP1
PRDM1.2	1.16202e-186	0.925272	0.447	0.177	2.27861e-182	Tf regulatory cells	PRDM1
LCK.1	2.88083e-140	0.924891	0.865	0.559	5.64902e-136	Th1 cells	LCK
SPOCK2.6	6.81467e-136	0.924254	0.908	0.707	1.33629e-131	Tr1 cells	SPOCK2
LAPTM5	9.73398e-141	0.923326	0.947	0.866	1.90874e-136	Tr1 cells	LAPTM5
ABHD17A.1	1.31201e-154	0.922294	0.853	0.49	2.57272e-150	Th1 cells	ABHD17A
TNFRSF4.3	0	0.918774	0.461	0.136	0	Th2 cells	TNFRSF4
ATP5IF1.1	5.31658e-139	0.917993	0.896	0.596	1.04253e-134	Th1 cells	ATP5IF1
CLIC1.4	3.50062e-196	0.91797	0.671	0.369	6.86437e-192	Tf regulatory cells	CLIC1
C12orf75.5	1.87238e-186	0.913988	0.534	0.155	3.67154e-182	Th1 cells	C12orf75
PPP2R5C.4	8.08949e-146	0.913878	0.96	0.737	1.58627e-141	Th1 cells	PPP2R5C
S100A10.3	0	0.913059	0.98	0.77	0	Th17 cells	S100A10
LAT.1	8.82981e-136	0.912637	0.831	0.457	1.73144e-131	Th1 cells	LAT
CD2.2	1.34688e-104	0.910028	0.905	0.745	2.64109e-100	Tr1 cells	CD2
RNF213.2	3.21864e-89	0.908896	0.751	0.501	6.31144e-85	Tr1 cells	RNF213
LGALS3.8	6.84983e-145	0.907026	0.373	0.095	1.34318e-140	Tr1 cells	LGALS3
N4BP1.1	2.14712e-119	0.906423	0.707	0.376	4.21028e-115	Tr1 cells	N4BP1
FGFBP2.1	6.91578e-280	0.905703	0.225	0.021	1.35612e-275	Tr1 cells	FGFBP2
GATA3.3	0	0.904243	0.537	0.208	0	Th2 cells	GATA3
JMJD6.2	2.02601e-186	0.903216	0.66	0.227	3.9728e-182	Th1 cells	JMJD6
IDH2	2.6835e-223	0.895501	0.617	0.182	5.26207e-219	Th1 cells	IDH2
SEPTIN6.2	1.14349e-60	0.8955	0.616	0.411	2.24227e-56	Th1 cells	SEPTIN6
CD3D.2	3.04846e-155	0.894341	0.955	0.871	5.97773e-151	Th1 cells	CD3D
DBI.3	3.36549e-136	0.890487	0.816	0.489	6.59939e-132	Th1 cells	DBI
CARHSP1.2	8.66555e-138	0.890219	0.479	0.162	1.69923e-133	Tr1 cells	CARHSP1
GBP5.3	3.00689e-116	0.889792	0.531	0.21	5.89621e-112	Tr1 cells	GBP5
BTG3.2	3.21621e-117	0.889238	0.56	0.235	6.30667e-113	Tr1 cells	BTG3
S1PR4.6	2.04093e-95	0.888176	0.673	0.387	4.00205e-91	Tr1 cells	S1PR4
ACTB.4	1.09179e-271	0.887666	0.997	0.981	2.14089e-267	Tf regulatory cells	ACTB
SPPL2A.2	4.2814e-134	0.880827	0.535	0.202	8.39539e-130	Tr1 cells	SPPL2A
CACYBP.2	4.27582e-100	0.880147	0.696	0.402	8.38445e-96	Tr1 cells	CACYBP
BHLHE40.3	0	0.879337	0.495	0.138	0	Th2 cells	BHLHE40
HLA-DPA1.5	1.71187e-99	0.87889	0.452	0.174	3.35681e-95	Tr1 cells	HLA-DPA1
IQGAP2.5	3.62264e-116	0.877829	0.672	0.336	7.10363e-112	Tr1 cells	IQGAP2
PSME2.6	1.40959e-107	0.875703	0.819	0.521	2.76406e-103	Th1 cells	PSME2
ZFP36.2	0	0.873899	0.962	0.825	0	Th2 cells	ZFP36
ISG20.5	6.23572e-106	0.873452	0.848	0.624	1.22276e-101	Tr1 cells	ISG20
SAMHD1.3	3.37789e-167	0.872314	0.724	0.472	6.62371e-163	Tf regulatory cells	SAMHD1
PLP2.2	0	0.87162	0.751	0.393	0	Th2 cells	PLP2
STX11.3	3.74894e-187	0.87107	0.491	0.133	7.35129e-183	Tr1 cells	STX11
COTL1.7	1.26683e-107	0.869064	0.825	0.56	2.48413e-103	Tr1 cells	COTL1
HLA-C.6	1.5803e-212	0.869046	1	0.994	3.09882e-208	Tr1 cells	HLA-C
SH3BGRL3.8	2.43978e-154	0.867643	0.993	0.899	4.78417e-150	Tr1 cells	SH3BGRL3
CAST.5	3.5624e-93	0.867145	0.812	0.511	6.9855e-89	Th1 cells	CAST
SMAD7.4	1.09806e-100	0.866967	0.781	0.485	2.15318e-96	Tr1 cells	SMAD7
TRBC2.6	6.06506e-07	0.866474	0.311	0.255	0.011893	Tr1 cells	TRBC2
ISG20.3	1.18127e-178	0.865873	0.825	0.621	2.31635e-174	Tf regulatory cells	ISG20
RNF213.1	1.12204e-117	0.86342	0.842	0.499	2.20021e-113	Th1 cells	RNF213
TMSB4X.6	5.88882e-207	0.863295	1	1	1.15474e-202	Tr1 cells	TMSB4X
PHACTR2.4	5.93372e-122	0.863159	0.625	0.263	1.16354e-117	Th1 cells	PHACTR2
HLA-DRB5	0	0.86004	0.271	0.035	0	Tf regulatory cells	HLA-DRB5
S100A6.6	3.64376e-62	0.857846	0.913	0.847	7.14506e-58	Th1 cells	S100A6
BHLHE40.4	0	0.857655	0.555	0.151	0	Th17 cells	BHLHE40
AHNAK.5	0	0.857458	0.798	0.397	0	Th17 cells	AHNAK
ALOX5AP.5	1.08545e-128	0.855999	0.474	0.246	2.12846e-124	Tf regulatory cells	ALOX5AP
YWHAB.4	7.38253e-216	0.855287	0.911	0.775	1.44764e-211	Tf regulatory cells	YWHAB
EMP3.3	0	0.855045	0.913	0.663	0	Th2 cells	EMP3
CYTOR.2	8.80223e-94	0.854194	0.224	0.054	1.72603e-89	Tr1 cells	CYTOR
IKZF3.2	5.45264e-115	0.853885	0.473	0.175	1.06921e-110	Tr1 cells	IKZF3
ISG15.3	2.32534e-58	0.853417	0.655	0.426	4.55975e-54	Tr1 cells	ISG15
PPP1CA.5	1.59203e-106	0.852462	0.655	0.341	3.12181e-102	Tr1 cells	PPP1CA
CYBA.6	1.48953e-113	0.850062	0.952	0.817	2.92082e-109	Th1 cells	CYBA
S100A6.3	0	0.849691	0.97	0.832	0	Th2 cells	S100A6
GZMM.3	2.82926e-102	0.84965	0.822	0.504	5.5479e-98	Th1 cells	GZMM
HLA-DQA1	0	0.849402	0.214	0.019	0	Tf regulatory cells	HLA-DQA1
IDI1.2	1.2591e-88	0.849144	0.788	0.522	2.46897e-84	Tr1 cells	IDI1
CSTB.4	6.53999e-111	0.849106	0.744	0.399	1.28243e-106	Th1 cells	CSTB
UTRN	4.16578e-125	0.848964	0.747	0.368	8.16868e-121	Th1 cells	UTRN
LYAR.4	4.59931e-139	0.848607	0.507	0.171	9.01878e-135	Tr1 cells	LYAR
ORAI1.3	2.74585e-123	0.846624	0.628	0.282	5.38434e-119	Tr1 cells	ORAI1
TIMP1.3	0	0.846592	0.584	0.232	0	Th2 cells	TIMP1
HLA-B.6	5.46534e-231	0.845789	1	0.997	1.0717e-226	Tr1 cells	HLA-B
HLA-DMA.1	0	0.845518	0.432	0.042	0	Th1 cells	HLA-DMA
PSMB9.4	1.31512e-98	0.845074	0.724	0.438	2.57882e-94	Tr1 cells	PSMB9
CCNH.3	9.46523e-89	0.844543	0.681	0.39	1.85604e-84	Tr1 cells	CCNH
SAT1.4	1.69349e-113	0.844166	0.817	0.669	3.32076e-109	Tf regulatory cells	SAT1
ANXA2.4	0	0.843957	0.624	0.194	0	Th17 cells	ANXA2
CDKN1A.3	0	0.843752	0.504	0.156	0	Th2 cells	CDKN1A
SERF2.1	8.51653e-189	0.84349	0.991	0.955	1.67001e-184	Th1 cells	SERF2
CD52.6	6.43996e-229	0.842989	0.982	0.926	1.26281e-224	Tf regulatory cells	CD52
PTPRJ.1	1.44256e-183	0.84279	0.417	0.103	2.82871e-179	Tr1 cells	PTPRJ
COX5A.4	6.65674e-144	0.841519	0.769	0.4	1.30532e-139	Th1 cells	COX5A
LIMD2.2	4.11635e-159	0.841431	0.984	0.863	8.07175e-155	Th1 cells	LIMD2
PTMS	2.1038e-229	0.840885	0.244	0.03	4.12535e-225	Th1 cells	PTMS
TAP1.1	6.05406e-165	0.838513	0.627	0.225	1.18714e-160	Th1 cells	TAP1
HLA-A.4	0	0.838175	0.998	0.994	0	Tf regulatory cells	HLA-A
LITAF.1	9.76611e-89	0.837702	0.877	0.704	1.91504e-84	Tr1 cells	LITAF
GNG5.2	9.62876e-140	0.836615	0.76	0.366	1.8881e-135	Th1 cells	GNG5
LYST.1	8.93154e-113	0.834974	0.52	0.21	1.75139e-108	Tr1 cells	LYST
CFLAR.3	6.78563e-93	0.833784	0.671	0.375	1.33059e-88	Tr1 cells	CFLAR
PTPN22.2	1.93159e-130	0.833504	0.56	0.216	3.78765e-126	Tr1 cells	PTPN22
CBLB	7.31573e-203	0.833316	0.644	0.2	1.43454e-198	Th1 cells	CBLB
PLAAT4.1	1.50451e-36	0.8328	0.553	0.425	2.95018e-32	Tr1 cells	PLAAT4
ITGB2.2	1.49277e-114	0.832279	0.848	0.533	2.92717e-110	Th1 cells	ITGB2
B2M.6	0	0.83181	1	1	0	Tr1 cells	B2M
OTULIN.1	2.47545e-120	0.829176	0.507	0.191	4.8541e-116	Tr1 cells	OTULIN
HMGB2.3	8.00408e-93	0.828927	0.823	0.578	1.56952e-88	Tr1 cells	HMGB2
C9orf16.3	2.65958e-90	0.828128	0.829	0.632	5.21517e-86	Tr1 cells	C9orf16
S100A6.5	1.90019e-165	0.827816	0.934	0.845	3.72609e-161	Tf regulatory cells	S100A6
SESTD1	0	0.825805	0.371	0.021	0	Th1 cells	SESTD1
ANXA1.5	0	0.82525	0.935	0.61	0	Th17 cells	ANXA1
LTB.3	0	0.825151	0.995	0.955	0	Th17 cells	LTB
IL32.2	0	0.824827	0.967	0.781	0	Th2 cells	IL32
IL10RA.3	6.10032e-178	0.824501	0.537	0.257	1.19621e-173	Tf regulatory cells	IL10RA
CTSH	0	0.823401	0.426	0.04	0	Th17 cells	CTSH
REEP5.5	6.9392e-156	0.82328	0.683	0.267	1.36071e-151	Th1 cells	REEP5
CEMIP2.3	2.46409e-90	0.821883	0.72	0.427	4.83183e-86	Tr1 cells	CEMIP2
ARL4C.5	6.27428e-119	0.821642	0.972	0.894	1.23032e-114	Tr1 cells	ARL4C
TUBA4A.4	1.24414e-93	0.821252	0.821	0.491	2.43963e-89	Th1 cells	TUBA4A
SAT1.6	1.04065e-77	0.820892	0.848	0.671	2.04061e-73	Tr1 cells	SAT1
RBM38.2	2.19463e-93	0.820429	0.86	0.64	4.30344e-89	Tr1 cells	RBM38
REEP5.6	1.07804e-118	0.818529	0.605	0.268	2.11394e-114	Tr1 cells	REEP5
TXN.3	0	0.816973	0.709	0.395	0	Th2 cells	TXN
ITGAL.1	6.40173e-153	0.816572	0.489	0.156	1.25532e-148	Tr1 cells	ITGAL
HLA-DQB1.5	3.9914e-130	0.815384	0.345	0.089	7.82673e-126	Tr1 cells	HLA-DQB1
CTSW.2	8.2444e-90	0.814597	0.318	0.099	1.61664e-85	Th1 cells	CTSW
S100A4.6	7.61926e-42	0.813142	0.795	0.601	1.49406e-37	Th1 cells	S100A4
MSN.5	7.54641e-88	0.812243	0.711	0.447	1.47978e-83	Tr1 cells	MSN
JPT1.5	8.10425e-101	0.809252	0.584	0.278	1.58916e-96	Tr1 cells	JPT1
ITGB1.5	0	0.808899	0.764	0.334	0	Th17 cells	ITGB1
AREG	0	0.807824	0.617	0.412	0	Activated CD4 T cells	AREG
LRRFIP1.5	1.05067e-85	0.80576	0.911	0.756	2.06025e-81	Tr1 cells	LRRFIP1
POMP.1	5.9365e-126	0.805571	0.858	0.534	1.16409e-121	Th1 cells	POMP
REL.4	1.00114e-86	0.805451	0.847	0.602	1.96314e-82	Th1 cells	REL
LIMS1.7	1.57103e-103	0.802801	0.567	0.249	3.08064e-99	Tr1 cells	LIMS1
CTSC.2	2.0325e-110	0.802572	0.491	0.192	3.98553e-106	Tr1 cells	CTSC
AHNAK.8	7.72871e-92	0.801754	0.751	0.419	1.51552e-87	Tr1 cells	AHNAK
AKAP13.7	4.80412e-89	0.80116	0.819	0.609	9.4204e-85	Tr1 cells	AKAP13
MT2A.3	4.5317e-39	0.800327	0.511	0.327	8.88622e-35	Tr1 cells	MT2A
SLFN5.1	8.41212e-137	0.798759	0.59	0.343	1.64953e-132	Tf regulatory cells	SLFN5
AP2S1	2.40511e-193	0.79846	0.657	0.222	4.71618e-189	Th1 cells	AP2S1
CAPZB.3	4.86541e-123	0.798268	0.895	0.649	9.54058e-119	Th1 cells	CAPZB
PRF1	7.33944e-300	0.798125	0.269	0.029	1.43919e-295	Th1 cells	PRF1
LGALS3.5	0	0.797462	0.435	0.074	0	Th17 cells	LGALS3
RABGAP1L.2	2.9416e-104	0.797165	0.581	0.266	5.76818e-100	Tr1 cells	RABGAP1L
GGA2	1.20742e-249	0.796087	0.466	0.097	2.36763e-245	Th1 cells	GGA2
HAVCR2	0	0.795838	0.387	0.019	0	Th1 cells	HAVCR2
VAMP5.2	2.97664e-86	0.795424	0.525	0.25	5.83689e-82	Tr1 cells	VAMP5
SYNE2.7	1.48241e-76	0.795145	0.74	0.477	2.90686e-72	Tr1 cells	SYNE2
EVA1B	0	0.794742	0.253	0.022	0	Tr1 cells	EVA1B
SAMSN1.6	1.77544e-173	0.794435	0.789	0.519	3.48147e-169	Tf regulatory cells	SAMSN1
FAM160B1.3	6.94203e-157	0.794122	0.48	0.144	1.36126e-152	Tr1 cells	FAM160B1
ATP5MF.2	3.45219e-126	0.793947	0.751	0.393	6.7694e-122	Th1 cells	ATP5MF
MYH9.4	4.48523e-114	0.793385	0.805	0.471	8.79509e-110	Th1 cells	MYH9
MT1E	0	0.792991	0.357	0.024	0	Th1 cells	MT1E
HLA-DPB1.6	2.85496e-57	0.79291	0.44	0.222	5.5983e-53	Tr1 cells	HLA-DPB1
TRIM8.1	0	0.792757	0.525	0.241	0	Tfh cells	TRIM8
ACTB.6	2.07521e-139	0.791173	0.997	0.981	4.06927e-135	Tr1 cells	ACTB
TRPS1.2	1.88006e-108	0.789598	0.487	0.185	3.6866e-104	Tr1 cells	TRPS1
RAB27A.1	1.14068e-241	0.789045	0.527	0.124	2.23676e-237	Th1 cells	RAB27A
DTHD1	0	0.787974	0.308	0.006	0	Th1 cells	DTHD1
TNFRSF4.7	5.3635e-62	0.787419	0.393	0.17	1.05173e-57	Tr1 cells	TNFRSF4
RAC2.3	1.55846e-84	0.786268	0.831	0.651	3.05598e-80	Tr1 cells	RAC2
FOXP3	0	0.78604	0.331	0.015	0	T regulatory cells	FOXP3
JMJD6.3	3.5817e-90	0.785763	0.513	0.23	7.02335e-86	Tr1 cells	JMJD6
TNFRSF1B.3	1.19182e-158	0.785218	0.557	0.284	2.33704e-154	Tf regulatory cells	TNFRSF1B
FOSB.1	0	0.783319	0.82	0.67	0	Activated CD4 T cells	FOSB
CD69.1	0	0.78085	0.9	0.791	0	Activated CD4 T cells	CD69
ARPC3.4	1.75579e-110	0.780628	0.941	0.82	3.44293e-106	Tr1 cells	ARPC3
CARHSP1.1	8.5627e-204	0.779723	0.574	0.16	1.67906e-199	Th1 cells	CARHSP1
DRAP1	1.53976e-137	0.779391	0.786	0.399	3.01931e-133	Th1 cells	DRAP1
TTC39C.2	1.73506e-108	0.77741	0.526	0.316	3.40228e-104	Tf regulatory cells	TTC39C
STAM	2.4527e-292	0.777032	0.37	0.095	4.8095e-288	Tf regulatory cells	STAM
CARD16	1.55118e-156	0.775793	0.414	0.174	3.04171e-152	Tf regulatory cells	CARD16
GYPC.3	1.71464e-99	0.772457	0.93	0.765	3.36223e-95	Th1 cells	GYPC
TIPARP.4	1.25052e-81	0.772012	0.611	0.32	2.45214e-77	Tr1 cells	TIPARP
PMAIP1.3	6.4984e-81	0.771414	0.491	0.213	1.27427e-76	Tr1 cells	PMAIP1
EPSTI1.2	3.38367e-111	0.770766	0.496	0.191	6.63504e-107	Tr1 cells	EPSTI1
RHOG.5	2.44207e-90	0.77034	0.756	0.503	4.78865e-86	Tr1 cells	RHOG
CCL20	0	0.770324	0.166	0.013	0	Th17 cells	CCL20
PSMB3.2	5.73381e-116	0.770189	0.778	0.422	1.12434e-111	Th1 cells	PSMB3
CDKN1A.5	1.71259e-96	0.770015	0.48	0.192	3.35821e-92	Tr1 cells	CDKN1A
GBP2.2	6.01282e-67	0.769529	0.603	0.36	1.17905e-62	Tr1 cells	GBP2
ACTN4.5	1.29727e-185	0.767853	0.448	0.113	2.54382e-181	Tr1 cells	ACTN4
LY6E.7	1.45072e-83	0.766865	0.767	0.524	2.84471e-79	Tr1 cells	LY6E
CD53.1	4.28279e-113	0.766367	0.839	0.528	8.39812e-109	Th1 cells	CD53
GGA2.1	2.58689e-184	0.765613	0.411	0.098	5.07263e-180	Tr1 cells	GGA2
PFN1.5	9.89427e-229	0.764911	0.973	0.915	1.94017e-224	Tf regulatory cells	PFN1
LAIR2.1	0	0.764854	0.311	0.053	0	Tf regulatory cells	LAIR2
BRK1.2	1.82629e-120	0.764706	0.756	0.414	3.58118e-116	Th1 cells	BRK1
ATP5F1C	4.24035e-112	0.76219	0.757	0.432	8.31491e-108	Th1 cells	ATP5F1C
S100A6.4	0	0.76144	0.98	0.838	0	Th17 cells	S100A6
GADD45G.4	2.32114e-87	0.76143	0.389	0.144	4.55152e-83	Tr1 cells	GADD45G
NAMPT.3	8.2629e-63	0.76004	0.637	0.408	1.62027e-58	Tr1 cells	NAMPT
CORO1A.3	7.67615e-82	0.755876	0.913	0.816	1.50522e-77	Tr1 cells	CORO1A
SH2D2A.2	6.01177e-129	0.755775	0.479	0.165	1.17885e-124	Tr1 cells	SH2D2A
FKBP1A.1	2.74847e-121	0.755055	0.697	0.334	5.38948e-117	Th1 cells	FKBP1A
EPSTI1.1	1.23158e-143	0.753653	0.555	0.19	2.41501e-139	Th1 cells	EPSTI1
OASL.1	2.33931e-193	0.753574	0.327	0.061	4.58715e-189	Tr1 cells	OASL
SPTBN1	2.26051e-102	0.753508	0.649	0.302	4.43264e-98	Th1 cells	SPTBN1
UBC.4	8.1554e-263	0.752476	0.996	0.979	1.59919e-258	Tf regulatory cells	UBC
ARPC4.1	5.77113e-105	0.752092	0.71	0.377	1.13166e-100	Th1 cells	ARPC4
RAB11FIP1.5	7.87835e-91	0.751623	0.491	0.21	1.54487e-86	Tr1 cells	RAB11FIP1
PSME1.6	3.99554e-118	0.749877	0.943	0.769	7.83486e-114	Th1 cells	PSME1
CD52.7	1.72678e-95	0.749757	0.977	0.927	3.38603e-91	Th1 cells	CD52
LDHA.4	4.80158e-85	0.748528	0.936	0.798	9.41541e-81	Tr1 cells	LDHA
RAB11FIP1.4	2.63919e-134	0.748012	0.443	0.206	5.17519e-130	Tf regulatory cells	RAB11FIP1
APOBEC3G.1	6.26505e-174	0.747736	0.393	0.093	1.22851e-169	Tr1 cells	APOBEC3G
PPP2R5C.5	7.33174e-95	0.746688	0.917	0.738	1.43768e-90	Tr1 cells	PPP2R5C
TYMP.2	4.84194e-143	0.746366	0.4	0.11	9.49456e-139	Tr1 cells	TYMP
HSPB11	6.39193e-166	0.74634	0.584	0.189	1.25339e-161	Th1 cells	HSPB11
SLC35E1.1	1.53387e-98	0.74593	0.492	0.2	3.00776e-94	Tr1 cells	SLC35E1
YPEL3.3	6.28006e-80	0.745159	0.735	0.477	1.23146e-75	Tr1 cells	YPEL3
GAPDH.6	1.27342e-177	0.743508	0.955	0.873	2.49704e-173	Tf regulatory cells	GAPDH
GRASP.2	0	0.743228	0.612	0.3	0	Th2 cells	GRASP
DDIT4.6	2.93105e-54	0.742451	0.717	0.481	5.7475e-50	Tr1 cells	DDIT4
CRIP1.7	2.3584e-57	0.740512	0.68	0.439	4.62459e-53	Tr1 cells	CRIP1
C9orf16.2	4.85928e-115	0.740382	0.892	0.63	9.52855e-111	Th1 cells	C9orf16
GUK1.3	1.08184e-118	0.738507	0.913	0.693	2.12138e-114	Th1 cells	GUK1
SH3BGRL3.5	0	0.738037	0.995	0.893	0	Th17 cells	SH3BGRL3
C12orf75.4	9.31348e-192	0.736983	0.417	0.152	1.82628e-187	Tf regulatory cells	C12orf75
PBXIP1.3	1.00807e-122	0.736857	0.658	0.449	1.97672e-118	Tf regulatory cells	PBXIP1
TPM4.4	4.97673e-100	0.73534	0.666	0.335	9.75888e-96	Th1 cells	TPM4
MOB4.1	8.15666e-95	0.735073	0.515	0.225	1.59944e-90	Tr1 cells	MOB4
FYN.3	2.3142e-103	0.733031	0.903	0.636	4.53791e-99	Th1 cells	FYN
MYL12A.4	1.66996e-100	0.732962	0.96	0.833	3.27463e-96	Th1 cells	MYL12A
ATP5F1E.1	1.18456e-98	0.732556	0.985	0.973	2.3228e-94	Tr1 cells	ATP5F1E
FKBP1A.2	9.95014e-78	0.732461	0.601	0.336	1.95112e-73	Tr1 cells	FKBP1A
FCMR.4	1.93448e-85	0.732302	0.783	0.464	3.79332e-81	Th1 cells	FCMR
RHOG.4	2.75798e-98	0.731988	0.812	0.502	5.40811e-94	Th1 cells	RHOG
PDE4B.1	3.97499e-73	0.731673	0.668	0.4	7.79457e-69	Tr1 cells	PDE4B
HSPD1	2.98101e-51	0.731376	0.663	0.477	5.84545e-47	Tr1 cells	HSPD1
EMP3.4	0	0.730711	0.935	0.673	0	Th17 cells	EMP3
SAMD3	4.20208e-250	0.730073	0.529	0.118	8.23987e-246	Th1 cells	SAMD3
NR3C1.4	0	0.728786	0.723	0.468	0	Th2 cells	NR3C1
BIRC3.1	1.41491e-99	0.728433	0.803	0.666	2.77451e-95	Tf regulatory cells	BIRC3
LSP1.1	3.76492e-132	0.727561	0.722	0.531	7.38263e-128	Tf regulatory cells	LSP1
WDR1.1	1.28498e-142	0.727031	0.609	0.227	2.51972e-138	Th1 cells	WDR1
EMP3.5	1.08035e-160	0.726428	0.881	0.685	2.11846e-156	Tf regulatory cells	EMP3
ACTR2.1	3.26753e-102	0.726424	0.851	0.576	6.40729e-98	Th1 cells	ACTR2
PRDM1.3	1.46588e-91	0.725962	0.46	0.182	2.87444e-87	Tr1 cells	PRDM1
MIDN.4	3.19976e-66	0.725322	0.729	0.484	6.27441e-62	Tr1 cells	MIDN
NR4A2.5	5.35004e-59	0.724754	0.839	0.661	1.04909e-54	Tr1 cells	NR4A2
ATP5MPL	6.34525e-100	0.724579	0.856	0.584	1.24424e-95	Th1 cells	ATP5MPL
DBI.4	7.78642e-79	0.7243	0.728	0.491	1.52684e-74	Tr1 cells	DBI
EFHD2.4	8.53397e-106	0.724106	0.564	0.233	1.67343e-101	Th1 cells	EFHD2
ENO1.3	3.13951e-98	0.724049	0.864	0.595	6.15627e-94	Th1 cells	ENO1
ZEB2.2	1.15867e-274	0.723897	0.357	0.053	2.27204e-270	Th1 cells	ZEB2
DRAP1.1	2.25789e-73	0.723522	0.652	0.401	4.42749e-69	Tr1 cells	DRAP1
IQGAP2.3	8.46446e-124	0.723351	0.565	0.333	1.6598e-119	Tf regulatory cells	IQGAP2
IFI27L2.2	3.76951e-109	0.723312	0.465	0.173	7.39163e-105	Tr1 cells	IFI27L2
PARK7.1	2.68415e-105	0.722246	0.832	0.559	5.26335e-101	Th1 cells	PARK7
ATP2B1.5	7.7631e-108	0.720943	0.581	0.365	1.52227e-103	Tf regulatory cells	ATP2B1
PHLDA1.2	3.25439e-190	0.720564	0.431	0.1	6.38154e-186	Th1 cells	PHLDA1
IFNG	2.84633e-268	0.719738	0.164	0.012	5.58137e-264	Tr1 cells	IFNG
FMNL1.6	3.10257e-129	0.719651	0.735	0.323	6.08383e-125	Th1 cells	FMNL1
PPM1G.2	9.10194e-87	0.719539	0.612	0.322	1.7848e-82	Tr1 cells	PPM1G
LAYN	0	0.719502	0.296	0.007	0	Th1 cells	LAYN
CD38.1	2.36367e-234	0.718952	0.32	0.05	4.63492e-230	Tr1 cells	CD38
CYTOR	1.55106e-144	0.718555	0.201	0.052	3.04148e-140	Tf regulatory cells	CYTOR
GALM.1	7.98424e-138	0.717549	0.364	0.096	1.56563e-133	Tr1 cells	GALM
TNFSF9	4.52264e-269	0.716773	0.229	0.023	8.86844e-265	Tr1 cells	TNFSF9
GIMAP7	0	0.716607	0.899	0.743	0	Naive CD4 T cells	GIMAP7
ICOS.4	6.29396e-51	0.716497	0.692	0.501	1.23418e-46	Tr1 cells	ICOS
PAXX.2	9.88955e-76	0.715987	0.588	0.317	1.93924e-71	Tr1 cells	PAXX
HLA-A.5	1.35274e-186	0.715448	0.999	0.994	2.6526e-182	Th1 cells	HLA-A
ANXA5.5	2.4129e-166	0.715372	0.502	0.227	4.73145e-162	Tf regulatory cells	ANXA5
EVL.1	7.5213e-85	0.712877	0.886	0.677	1.47485e-80	Th1 cells	EVL
DENND2D	9.74052e-167	0.712793	0.487	0.137	1.91002e-162	Th1 cells	DENND2D
LIMS1.3	0	0.711075	0.489	0.203	0	Tfh cells	LIMS1
FLNA.7	7.46786e-85	0.711028	0.628	0.326	1.46437e-80	Tr1 cells	FLNA
ATP5F1B	1.14398e-103	0.709034	0.816	0.526	2.24323e-99	Th1 cells	ATP5F1B
FMNL1.7	1.52608e-83	0.708609	0.619	0.325	2.99249e-79	Tr1 cells	FMNL1
ALOX5AP.3	0	0.707737	0.487	0.223	0	Th2 cells	ALOX5AP
CAST.4	1.0447e-103	0.707564	0.693	0.51	2.04856e-99	Tf regulatory cells	CAST
COX6B1	3.10339e-109	0.706962	0.913	0.72	6.08545e-105	Th1 cells	COX6B1
H2AZ2	1.16457e-53	0.705455	0.612	0.411	2.2836e-49	Th1 cells	H2AZ2
PSMA4	2.38577e-113	0.705295	0.682	0.328	4.67826e-109	Th1 cells	PSMA4
APOBEC3C	1.11026e-307	0.70402	0.44	0.072	2.17711e-303	Th1 cells	APOBEC3C
PLAAT4	2.59194e-40	0.703917	0.594	0.424	5.08254e-36	Th1 cells	PLAAT4
ODC1.4	5.96807e-60	0.703857	0.819	0.638	1.17028e-55	Tr1 cells	ODC1
PHLDA1.3	1.13434e-102	0.702976	0.337	0.102	2.22434e-98	Tr1 cells	PHLDA1
SNX9.1	2.74044e-71	0.701943	0.603	0.327	5.37372e-67	Th1 cells	SNX9
INSIG1.1	5.33896e-79	0.701914	0.473	0.212	1.04692e-74	Tr1 cells	INSIG1
GNG5.3	6.66207e-82	0.701865	0.643	0.368	1.30637e-77	Tr1 cells	GNG5
LRRFIP1.4	8.03781e-83	0.701008	0.943	0.755	1.57613e-78	Th1 cells	LRRFIP1
IKZF3	5.78319e-114	0.700583	0.377	0.173	1.13403e-109	Tf regulatory cells	IKZF3
TWF2	5.04113e-180	0.700522	0.584	0.181	9.88516e-176	Th1 cells	TWF2
COX8A.1	6.21398e-87	0.699754	0.838	0.609	1.2185e-82	Th1 cells	COX8A
CD96	8.95807e-108	0.699677	0.69	0.321	1.75659e-103	Th1 cells	CD96
BCL2L11.1	3.14499e-171	0.698501	0.523	0.15	6.16702e-167	Th1 cells	BCL2L11
ATP5MC3	2.68039e-100	0.698138	0.842	0.591	5.25598e-96	Th1 cells	ATP5MC3
SPTAN1.2	9.5724e-66	0.698115	0.609	0.353	1.87705e-61	Tr1 cells	SPTAN1
HMGB1.3	1.54975e-108	0.697606	0.989	0.938	3.03891e-104	Tr1 cells	HMGB1
GNAI2.3	5.66116e-101	0.697548	0.882	0.648	1.1101e-96	Th1 cells	GNAI2
NDUFB10.1	8.90328e-119	0.69708	0.762	0.396	1.74585e-114	Th1 cells	NDUFB10
CYTH1.2	9.00038e-70	0.696972	0.752	0.53	1.76488e-65	Tr1 cells	CYTH1
MAF.6	2.1619e-103	0.69696	0.425	0.21	4.23926e-99	Tf regulatory cells	MAF
ID2.7	3.15856e-41	0.695767	0.704	0.503	6.19362e-37	Tr1 cells	ID2
NIBAN1.2	0	0.695005	0.321	0.059	0	Th2 cells	NIBAN1
CAPZA1	2.31119e-98	0.694406	0.806	0.48	4.53202e-94	Th1 cells	CAPZA1
ITM2A.4	3.62787e-60	0.694105	0.801	0.613	7.1139e-56	Tr1 cells	ITM2A
2006-09-01	3.37183e-19	0.693757	0.294	0.19	6.61182e-15	Th1 cells	2006-09-01
TRAC.4	1.11716e-16	0.693495	0.322	0.254	2.19064e-12	Tf regulatory cells	TRAC
ARHGDIB.3	4.52406e-126	0.693421	0.991	0.959	8.87123e-122	Tr1 cells	ARHGDIB
MAP1LC3B.2	1.1822e-67	0.693049	0.723	0.505	2.31817e-63	Tr1 cells	MAP1LC3B
ANXA5.3	0	0.692634	0.539	0.196	0	Th2 cells	ANXA5
CASP4.2	6.66495e-76	0.692253	0.564	0.3	1.30693e-71	Tr1 cells	CASP4
SLA.2	3.20815e-90	0.691992	0.629	0.297	6.29085e-86	Th1 cells	SLA
SUB1.6	1.93122e-105	0.691983	0.972	0.895	3.78694e-101	Tr1 cells	SUB1
PIP4K2A	1.15016e-116	0.691126	0.668	0.29	2.25534e-112	Th1 cells	PIP4K2A
GUK1.4	1.40141e-85	0.69039	0.855	0.694	2.74803e-81	Tr1 cells	GUK1
PARP1.1	7.88698e-134	0.69017	0.608	0.229	1.54656e-129	Th1 cells	PARP1
CMC1	8.7495e-118	0.6898	0.351	0.095	1.71569e-113	Th1 cells	CMC1
IL32.3	0	0.688273	0.981	0.79	0	Th17 cells	IL32
FKBP11.1	0	0.688045	0.606	0.254	0	Th17 cells	FKBP11
UBB.3	2.57985e-102	0.687717	0.967	0.91	5.05882e-98	Tr1 cells	UBB
RGCC.1	0	0.687433	0.939	0.805	0	Th2 cells	RGCC
PSMA5	7.82946e-115	0.686905	0.678	0.314	1.53528e-110	Th1 cells	PSMA5
OAZ1.4	2.6206e-123	0.686766	0.977	0.886	5.13873e-119	Th1 cells	OAZ1
KLF6.4	6.15288e-124	0.686304	0.942	0.844	1.20652e-119	Tf regulatory cells	KLF6
YWHAB.6	2.3344e-84	0.686288	0.911	0.778	4.57753e-80	Tr1 cells	YWHAB
ATP5F1E	3.41087e-127	0.685941	0.986	0.973	6.68838e-123	Th1 cells	ATP5F1E
CTLA4.2	2.66466e-113	0.685552	0.359	0.117	5.22514e-109	T regulatory cells	CTLA4
STMN1	2.14658e-115	0.685201	0.432	0.137	4.20923e-111	Th1 cells	STMN1
CMC2.2	1.13983e-83	0.684902	0.624	0.333	2.2351e-79	Tr1 cells	CMC2
TXN.7	1.29171e-74	0.684599	0.704	0.427	2.53291e-70	Tr1 cells	TXN
EZR.3	0	0.684274	0.862	0.638	0	Tfh cells	EZR
CIB1.3	1.73279e-73	0.684253	0.857	0.694	3.39782e-69	Tr1 cells	CIB1
B4GALT1.4	5.37133e-78	0.684149	0.577	0.297	1.05326e-73	Tr1 cells	B4GALT1
HSP90AA1.5	8.92445e-95	0.683587	0.969	0.93	1.75e-90	Tr1 cells	HSP90AA1
LAP3.1	1.59503e-80	0.683231	0.479	0.212	3.12769e-76	Tr1 cells	LAP3
PPIA.3	1.35464e-120	0.683185	0.984	0.928	2.65631e-116	Th1 cells	PPIA
CARD16.2	5.39862e-90	0.682688	0.448	0.178	1.05861e-85	Tr1 cells	CARD16
LSP1.3	6.14615e-72	0.682671	0.757	0.534	1.2052e-67	Tr1 cells	LSP1
PSMB1.2	2.05017e-106	0.681986	0.861	0.602	4.02019e-102	Th1 cells	PSMB1
EZR.5	2.00716e-126	0.681497	0.861	0.672	3.93585e-122	Tf regulatory cells	EZR
LBH.4	7.63633e-53	0.68138	0.619	0.404	1.49741e-48	Tr1 cells	LBH
CD99.5	1.81715e-131	0.681379	0.81	0.628	3.56325e-127	Tf regulatory cells	CD99
BLOC1S1.1	2.39225e-122	0.680711	0.691	0.299	4.69096e-118	Th1 cells	BLOC1S1
VMP1.3	3.10959e-51	0.680238	0.568	0.34	6.0976e-47	Tr1 cells	VMP1
TBC1D4.4	2.87292e-122	0.680152	0.438	0.214	5.63352e-118	Tf regulatory cells	TBC1D4
TLN1.1	1.5843e-107	0.679606	0.652	0.297	3.10666e-103	Th1 cells	TLN1
CYBA.5	3.78423e-160	0.678803	0.933	0.815	7.4205e-156	Tf regulatory cells	CYBA
UBE2L6	7.78577e-160	0.678216	0.613	0.207	1.52671e-155	Th1 cells	UBE2L6
PSMD8.1	8.22239e-102	0.677189	0.805	0.478	1.61233e-97	Th1 cells	PSMD8
PSMD8.2	7.85234e-77	0.677072	0.727	0.48	1.53977e-72	Tr1 cells	PSMD8
POMP.2	4.67038e-76	0.676719	0.764	0.536	9.15816e-72	Tr1 cells	POMP
SEPTIN7	7.86734e-45	0.675756	0.642	0.5	1.54271e-40	Th1 cells	SEPTIN7
CDKN1A.4	0	0.675431	0.494	0.174	0	Th17 cells	CDKN1A
MRPL10.1	2.2405e-104	0.674164	0.448	0.166	4.39341e-100	Tr1 cells	MRPL10
GMFG.3	1.77908e-84	0.673554	0.935	0.845	3.4886e-80	Tr1 cells	GMFG
IFRD1.3	1.0215e-36	0.672254	0.612	0.443	2.00305e-32	Tr1 cells	IFRD1
EIF3A.4	3.46226e-98	0.671869	0.722	0.556	6.78914e-94	Tf regulatory cells	EIF3A
JUN.1	1.19678e-302	0.671328	0.887	0.802	2.34677e-298	Activated CD4 T cells	JUN
GATA3.5	5.47708e-101	0.671113	0.453	0.239	1.074e-96	Tf regulatory cells	GATA3
SLC25A5.1	1.22248e-74	0.670587	0.852	0.703	2.39716e-70	Th1 cells	SLC25A5
OTULIN	1.5089e-137	0.670481	0.556	0.19	2.9588e-133	Th1 cells	OTULIN
IQGAP1.2	1.54728e-86	0.669358	0.705	0.376	3.03406e-82	Th1 cells	IQGAP1
GLCCI1.1	5.83969e-182	0.668144	0.492	0.129	1.14511e-177	Th1 cells	GLCCI1
OPTN.6	2.20341e-73	0.668134	0.599	0.323	4.32066e-69	Tr1 cells	OPTN
HLA-C.4	7.66557e-259	0.667972	0.996	0.994	1.50314e-254	Tf regulatory cells	HLA-C
DUSP10	4.41898e-155	0.66775	0.337	0.12	8.66518e-151	Tf regulatory cells	DUSP10
CCM2	8.02382e-106	0.667442	0.527	0.306	1.57339e-101	Tf regulatory cells	CCM2
RNASEH2B	2.83878e-113	0.666509	0.619	0.258	5.56657e-109	Th1 cells	RNASEH2B
FAM49B.1	5.44506e-102	0.666493	0.726	0.376	1.06772e-97	Th1 cells	FAM49B
PYCARD	1.26835e-198	0.665961	0.503	0.128	2.4871e-194	Th1 cells	PYCARD
EIF3A.5	7.48503e-69	0.665194	0.816	0.557	1.46774e-64	Th1 cells	EIF3A
PAK2.1	2.24979e-83	0.664703	0.847	0.548	4.41162e-79	Th1 cells	PAK2
FYN.4	9.00284e-70	0.664456	0.823	0.637	1.76537e-65	Tr1 cells	FYN
FAM102B	4.09938e-235	0.663686	0.449	0.092	8.03847e-231	Th1 cells	FAM102B
PLEKHA2.4	3.30742e-76	0.662935	0.593	0.311	6.48551e-72	Tr1 cells	PLEKHA2
PGAM1.4	3.18735e-66	0.660997	0.58	0.326	6.25008e-62	Tr1 cells	PGAM1
CDC42SE1.1	1.81893e-49	0.660634	0.681	0.492	3.56674e-45	Tr1 cells	CDC42SE1
PREX1.3	1.56779e-138	0.660484	0.57	0.202	3.07428e-134	Th1 cells	PREX1
RAB27A.2	5.63048e-135	0.660453	0.425	0.126	1.10408e-130	Tr1 cells	RAB27A
SRGN.5	4.97602e-108	0.659947	0.991	0.956	9.75748e-104	Th1 cells	SRGN
H1-2.1	7.61803e-59	0.659734	0.333	0.141	1.49382e-54	Tr1 cells	H1-2
JARID2.1	5.36086e-70	0.659066	0.421	0.186	1.05121e-65	Tr1 cells	JARID2
H3F3B.5	1.93919e-07	0.658482	0.336	0.292	0.00380256	Tr1 cells	H3F3B
IL7R.2	0	0.658335	0.983	0.922	0	Th17 cells	IL7R
LGALS1.5	0	0.658008	0.486	0.168	0	Th17 cells	LGALS1
CSTB.5	1.39825e-65	0.657812	0.647	0.4	2.74183e-61	Tr1 cells	CSTB
MT-CO3	1.69735e-134	0.657784	0.999	0.996	3.32833e-130	Th1 cells	MT-CO3
ARAP2.1	9.14949e-136	0.657545	0.599	0.216	1.79412e-131	Th1 cells	ARAP2
PITPNC1.2	1.93087e-82	0.657339	0.717	0.386	3.78625e-78	Th1 cells	PITPNC1
RHOF.1	3.61761e-69	0.656699	0.637	0.381	7.09377e-65	Tr1 cells	RHOF
ITGA4.3	2.52127e-56	0.656567	0.591	0.341	4.94397e-52	Tr1 cells	ITGA4
GSPT1.4	2.86725e-66	0.656506	0.825	0.634	5.62239e-62	Tr1 cells	GSPT1
CALR	9.59953e-52	0.655269	0.821	0.636	1.88237e-47	Tr1 cells	CALR
PYHIN1.2	1.20775e-116	0.655216	0.363	0.105	2.36828e-112	Tr1 cells	PYHIN1
TXN.4	2.32923e-282	0.655137	0.718	0.41	4.56739e-278	Th17 cells	TXN
HLA-DRB5.1	2.4849e-274	0.654391	0.3	0.038	4.87265e-270	Th1 cells	HLA-DRB5
DECR1	2.19136e-134	0.654387	0.57	0.207	4.29703e-130	Th1 cells	DECR1
TGFB1.6	4.0234e-79	0.653828	0.834	0.549	7.88949e-75	Th1 cells	TGFB1
DYNLRB1	1.37917e-96	0.653625	0.572	0.37	2.70442e-92	Tf regulatory cells	DYNLRB1
DDI2.1	1.49162e-191	0.653247	0.408	0.091	2.92492e-187	Th1 cells	DDI2
FLNA.5	1.15281e-106	0.652596	0.546	0.323	2.26055e-102	Tf regulatory cells	FLNA
PSME1.7	7.39987e-79	0.652461	0.896	0.77	1.45104e-74	Tr1 cells	PSME1
OAZ1.3	3.47668e-162	0.650931	0.944	0.885	6.81743e-158	Tf regulatory cells	OAZ1
CCL5.2	3.39121e-205	0.650898	0.209	0.079	6.64982e-201	Th2 cells	CCL5
AUTS2.2	0	0.650282	0.364	0.063	0	Th17 cells	AUTS2
FAM129A.1	6.23886e-170	0.648666	0.205	0.047	1.22338e-165	Tf regulatory cells	FAM129A
RHOG.3	2.70097e-106	0.648269	0.687	0.5	5.29634e-102	Tf regulatory cells	RHOG
PLP2.3	0	0.647859	0.735	0.412	0	Th17 cells	PLP2
IER5.2	1.02433e-277	0.647456	0.841	0.573	2.00861e-273	Th17 cells	IER5
PYHIN1	2.65687e-183	0.646341	0.326	0.101	5.20985e-179	Tf regulatory cells	PYHIN1
CD99.4	0	0.645982	0.859	0.605	0	Th2 cells	CD99
TMEM50A.5	2.79148e-94	0.645922	0.814	0.512	5.47382e-90	Th1 cells	TMEM50A
NDUFA12.1	4.75662e-73	0.645612	0.787	0.521	9.32725e-69	Th1 cells	NDUFA12
BAX.2	4.0162e-45	0.645443	0.551	0.334	7.87537e-41	Tr1 cells	BAX
MT1F	0	0.644908	0.377	0.044	0	Th1 cells	MT1F
TNFRSF18.1	0	0.64463	0.333	0.045	0	Th17 cells	TNFRSF18
CBLB.1	1.01403e-71	0.643806	0.451	0.204	1.9884e-67	Tr1 cells	CBLB
CTLA4.5	4.97317e-136	0.643705	0.419	0.117	9.75189e-132	Th1 cells	CTLA4
CLDND1.2	8.15089e-100	0.64315	0.498	0.286	1.59831e-95	Tf regulatory cells	CLDND1
MAPRE2	3.49483e-128	0.642827	0.6	0.225	6.85301e-124	Th1 cells	MAPRE2
YPEL3.2	4.07235e-75	0.642596	0.79	0.476	7.98548e-71	Th1 cells	YPEL3
RAB9A	5.39235e-71	0.642172	0.401	0.169	1.05739e-66	Tr1 cells	RAB9A
ANKRD11.1	6.20258e-74	0.642006	0.797	0.505	1.21626e-69	Th1 cells	ANKRD11
MYL6B	0	0.641718	0.406	0.033	0	Th1 cells	MYL6B
VAMP5.1	1.03194e-109	0.641484	0.601	0.248	2.02353e-105	Th1 cells	VAMP5
MYL12B.3	1.60844e-113	0.641116	0.971	0.858	3.15399e-109	Th1 cells	MYL12B
NDUFS5.2	1.61544e-72	0.640533	0.905	0.825	3.16771e-68	Tr1 cells	NDUFS5
EVI2B.4	1.03793e-68	0.640465	0.74	0.439	2.03527e-64	Th1 cells	EVI2B
CCSER2	1.28984e-72	0.640398	0.768	0.466	2.52925e-68	Th1 cells	CCSER2
MYL6.5	1.17046e-145	0.640076	0.957	0.885	2.29516e-141	Tf regulatory cells	MYL6
PPP2R5C.2	0	0.63948	0.892	0.708	0	Tfh cells	PPP2R5C
GABARAPL1.2	4.34678e-72	0.638848	0.683	0.368	8.52361e-68	Th1 cells	GABARAPL1
TTN	4.16212e-82	0.638629	0.228	0.089	8.16149e-78	Tf regulatory cells	TTN
LMNB1.1	9.63177e-114	0.638393	0.403	0.126	1.88869e-109	Tr1 cells	LMNB1
PERP.2	0	0.638201	0.372	0.071	0	Th17 cells	PERP
TUBB4B.2	0	0.638074	0.81	0.547	0	Th2 cells	TUBB4B
ELOB.1	2.2521e-88	0.637138	0.886	0.668	4.41614e-84	Th1 cells	ELOB
UBL5.1	2.82255e-82	0.637131	0.853	0.617	5.53474e-78	Th1 cells	UBL5
FOSL2.3	1.07308e-62	0.636928	0.591	0.323	2.1042e-58	Tr1 cells	FOSL2
SPON2.1	1.51559e-163	0.636589	0.253	0.043	2.97192e-159	Tr1 cells	SPON2
PSME2.7	1.22379e-57	0.635755	0.735	0.522	2.39973e-53	Tr1 cells	PSME2
CDV3.4	1.20468e-69	0.635467	0.807	0.611	2.36225e-65	Tr1 cells	CDV3
SCAF11.1	5.76764e-53	0.634938	0.795	0.599	1.13098e-48	Tr1 cells	SCAF11
SEC61B.3	0	0.634803	0.857	0.638	0	Th2 cells	SEC61B
SLC38A1.1	3.62266e-57	0.634465	0.743	0.535	7.10368e-53	Tr1 cells	SLC38A1
EMB.5	2.28581e-56	0.634213	0.679	0.441	4.48225e-52	Tr1 cells	EMB
DUSP2.5	3.85942e-52	0.634123	0.805	0.557	7.56793e-48	Th1 cells	DUSP2
CALM3.2	1.87009e-72	0.633915	0.748	0.472	3.66706e-68	Th1 cells	CALM3
CMTM7.2	3.43611e-92	0.633761	0.613	0.274	6.73788e-88	Th1 cells	CMTM7
GBP2	1.4439e-79	0.633617	0.54	0.357	2.83134e-75	Tf regulatory cells	GBP2
DNAJC1.1	4.06709e-117	0.633552	0.415	0.131	7.97516e-113	Tr1 cells	DNAJC1
ZC3H12D.1	6.21973e-127	0.633456	0.373	0.159	1.21963e-122	Tf regulatory cells	ZC3H12D
PPIB.3	0	0.633373	0.893	0.717	0	Th2 cells	PPIB
PTPRE	4.28814e-132	0.63333	0.47	0.148	8.4086e-128	Th1 cells	PTPRE
LYAR.2	0	0.633266	0.438	0.157	0	Th17 cells	LYAR
CALM3.3	2.99131e-50	0.633039	0.667	0.473	5.86566e-46	Tr1 cells	CALM3
ATXN1.4	9.00888e-73	0.632777	0.479	0.219	1.76655e-68	Tr1 cells	ATXN1
SEM1.1	8.85713e-83	0.632577	0.764	0.467	1.7368e-78	Th1 cells	SEM1
TRAPPC1.3	1.06701e-65	0.632496	0.585	0.338	2.09229e-61	Tr1 cells	TRAPPC1
GLCCI1.2	2.74487e-110	0.632239	0.403	0.13	5.38241e-106	Tr1 cells	GLCCI1
TGFBR3.3	1.61472e-122	0.631893	0.368	0.104	3.1663e-118	Tr1 cells	TGFBR3
COPE.4	2.82582e-90	0.631886	0.778	0.473	5.54114e-86	Th1 cells	COPE
MRPL10	5.40643e-138	0.63173	0.509	0.165	1.06015e-133	Th1 cells	MRPL10
B2M.4	0	0.631122	1	1	0	Tf regulatory cells	B2M
UCP2.1	2.93138e-79	0.630985	0.63	0.46	5.74815e-75	Tf regulatory cells	UCP2
DYNLL1.4	5.91885e-40	0.630845	0.668	0.496	1.16063e-35	Tr1 cells	DYNLL1
TPM4.5	3.86179e-50	0.629843	0.557	0.337	7.57259e-46	Tr1 cells	TPM4
BATF.1	9.21498e-59	0.629485	0.484	0.306	1.80697e-54	Tf regulatory cells	BATF
ANXA5.7	1.04418e-74	0.628453	0.503	0.232	2.04753e-70	Tr1 cells	ANXA5
RNF166.4	2.76459e-66	0.627367	0.557	0.287	5.42108e-62	Tr1 cells	RNF166
THRAP3	4.33455e-88	0.626884	0.795	0.472	8.49962e-84	Th1 cells	THRAP3
VPS37B	1.03357e-78	0.626625	0.573	0.268	2.02672e-74	Th1 cells	VPS37B
PLAC8.4	1.27966e-16	0.626103	0.626	0.532	2.50928e-12	Th1 cells	PLAC8
RGS16.1	0	0.625954	0.338	0.102	0	Th2 cells	RGS16
DUSP10.1	2.40021e-153	0.625224	0.448	0.122	4.70657e-149	Th1 cells	DUSP10
PTP4A2.1	5.61962e-58	0.625102	0.82	0.657	1.10195e-53	Tr1 cells	PTP4A2
DNAJC1	1.03401e-164	0.624728	0.475	0.13	2.0276e-160	Th1 cells	DNAJC1
OTULINL	7.72642e-82	0.624444	0.452	0.19	1.51507e-77	Tr1 cells	OTULINL
VMP1.2	1.88238e-66	0.623526	0.508	0.338	3.69117e-62	Tf regulatory cells	VMP1
BBC3	6.24926e-81	0.623296	0.361	0.132	1.22542e-76	Tr1 cells	BBC3
CTSC.1	1.83001e-120	0.622967	0.535	0.191	3.58847e-116	Th1 cells	CTSC
ATP6V0E1.4	7.88108e-54	0.622921	0.725	0.564	1.5454e-49	Tr1 cells	ATP6V0E1
GNG2.1	6.34148e-86	0.62273	0.692	0.354	1.2435e-81	Th1 cells	GNG2
YWHAZ.3	2.01604e-102	0.622311	0.961	0.869	3.95325e-98	Th1 cells	YWHAZ
RORA.4	4.04809e-93	0.622257	0.715	0.522	7.93789e-89	Tf regulatory cells	RORA
ANXA5.6	3.00808e-82	0.622111	0.529	0.231	5.89855e-78	Th1 cells	ANXA5
FAM177A1.4	3.11842e-61	0.622063	0.907	0.758	6.11491e-57	Tr1 cells	FAM177A1
COX8A.2	1.88513e-65	0.621494	0.785	0.61	3.69655e-61	Tr1 cells	COX8A
PIM3.3	1.37163e-42	0.621012	0.719	0.525	2.68963e-38	Tr1 cells	PIM3
TRBC2.4	3.61264e-08	0.620411	0.3	0.254	0.000708402	Tf regulatory cells	TRBC2
LMNA.7	8.31029e-77	0.620384	0.639	0.307	1.62957e-72	Tr1 cells	LMNA
LAMTOR2	2.43748e-188	0.619906	0.538	0.146	4.77966e-184	Th1 cells	LAMTOR2
FAM107B.5	2.57957e-74	0.619605	0.926	0.73	5.05827e-70	Th1 cells	FAM107B
PTPRJ	7.96786e-199	0.618724	0.447	0.102	1.56242e-194	Th1 cells	PTPRJ
SERF2.2	7.33682e-99	0.618667	0.976	0.955	1.43868e-94	Tr1 cells	SERF2
ARPC1B.6	3.79873e-98	0.618616	0.645	0.46	7.44893e-94	Tf regulatory cells	ARPC1B
BZW1.1	4.3449e-55	0.618579	0.784	0.613	8.51991e-51	Tr1 cells	BZW1
LCK.2	9.10958e-58	0.618546	0.757	0.561	1.7863e-53	Tr1 cells	LCK
UAP1	9.1409e-116	0.617812	0.494	0.174	1.79244e-111	Th1 cells	UAP1
CPNE1	5.09725e-119	0.616741	0.63	0.249	9.9952e-115	Th1 cells	CPNE1
SS18L2	6.44848e-60	0.616563	0.645	0.4	1.26448e-55	Tr1 cells	SS18L2
PRDX1.3	4.14058e-85	0.616484	0.613	0.436	8.11927e-81	Tf regulatory cells	PRDX1
ARL6IP1.1	2.98284e-54	0.616417	0.596	0.369	5.84906e-50	Tr1 cells	ARL6IP1
MAF.3	0	0.615766	0.428	0.171	0	Tfh cells	MAF
RHOA.1	3.07868e-77	0.615587	0.842	0.627	6.03699e-73	Th1 cells	RHOA
NFKB1.3	1.00383e-47	0.615284	0.591	0.375	1.96842e-43	Tr1 cells	NFKB1
ZFP36L2.2	0	0.61493	0.985	0.941	0	Th2 cells	ZFP36L2
RUNX3.3	3.98584e-296	0.614873	0.597	0.286	7.81583e-292	Th17 cells	RUNX3
ARPC3.2	1.14848e-123	0.614381	0.894	0.82	2.25205e-119	Tf regulatory cells	ARPC3
HLA-DRB1.4	3.25903e-78	0.614288	0.287	0.09	6.39063e-74	Tr1 cells	HLA-DRB1
DUSP4.4	1.55019e-115	0.613744	0.336	0.09	3.03978e-111	Th1 cells	DUSP4
HCLS1.1	1.33504e-87	0.613077	0.803	0.478	2.61788e-83	Th1 cells	HCLS1
NEDD8	5.50553e-82	0.613063	0.783	0.493	1.07958e-77	Th1 cells	NEDD8
CMTM6	9.35469e-206	0.612998	0.654	0.405	1.83436e-201	Th17 cells	CMTM6
ZEB2.3	4.36152e-117	0.612707	0.252	0.055	8.55251e-113	Tr1 cells	ZEB2
OSTF1.3	1.95903e-108	0.611084	0.596	0.246	3.84147e-104	Th1 cells	OSTF1
TNFRSF18.3	7.20615e-126	0.611083	0.276	0.062	1.41305e-121	Tr1 cells	TNFRSF18
BIRC3	1.22719e-47	0.609886	0.79	0.668	2.4064e-43	T regulatory cells	BIRC3
PPP1CA.3	5.09266e-91	0.609807	0.534	0.339	9.9862e-87	Tf regulatory cells	PPP1CA
SELENOK.2	8.62874e-70	0.608237	0.933	0.804	1.69201e-65	Tr1 cells	SELENOK
CMC2.1	6.91716e-83	0.608121	0.673	0.332	1.35639e-78	Th1 cells	CMC2
SH3BGRL.1	1.41407e-80	0.60739	0.787	0.485	2.77285e-76	Th1 cells	SH3BGRL
ARF4.3	8.76345e-57	0.607345	0.64	0.399	1.71843e-52	Tr1 cells	ARF4
MAP3K8.2	1.43521e-116	0.607103	0.369	0.105	2.8143e-112	Th1 cells	MAP3K8
EID1.2	5.19078e-78	0.606986	0.878	0.637	1.01786e-73	Th1 cells	EID1
CASP8	1.39549e-83	0.606193	0.573	0.384	2.73642e-79	Tf regulatory cells	CASP8
NDUFS6.1	3.85257e-102	0.605506	0.708	0.34	7.55451e-98	Th1 cells	NDUFS6
SRP14.2	8.31831e-99	0.605108	0.973	0.925	1.63114e-94	Tr1 cells	SRP14
PSMB2	2.71087e-119	0.604235	0.616	0.246	5.31574e-115	Th1 cells	PSMB2
H1-2	8.81684e-114	0.604218	0.43	0.139	1.72889e-109	Th1 cells	H1-2
TMEM50A.6	7.95218e-56	0.603964	0.707	0.514	1.55934e-51	Tr1 cells	TMEM50A
ARL4C.4	1.8723e-81	0.603797	0.978	0.894	3.6714e-77	Th1 cells	ARL4C
LRMP	1.30477e-174	0.603285	0.395	0.091	2.55852e-170	Th1 cells	LRMP
SUB1.5	2.79924e-82	0.60295	0.955	0.895	5.48903e-78	Th1 cells	SUB1
NCOA1	3.1426e-124	0.602878	0.47	0.152	6.16231e-120	Th1 cells	NCOA1
NFIL3	1.65856e-114	0.602521	0.253	0.058	3.25228e-110	Tr1 cells	NFIL3
CSK.1	5.12825e-109	0.601625	0.556	0.217	1.0056e-104	Th1 cells	CSK
KLHDC4	1.74978e-199	0.601131	0.46	0.107	3.43114e-195	Th1 cells	KLHDC4
EZR.7	4.73492e-46	0.600139	0.848	0.675	9.2847e-42	Tr1 cells	EZR
TRAPPC10.1	2.51725e-71	0.599548	0.512	0.249	4.93608e-67	Tr1 cells	TRAPPC10
HMGB1.2	4.62111e-93	0.599436	0.978	0.938	9.06153e-89	Th1 cells	HMGB1
MYL12B.4	1.7782e-90	0.599389	0.945	0.859	3.48687e-86	Tr1 cells	MYL12B
CLIC1.2	0	0.598855	0.668	0.341	0	Th2 cells	CLIC1
SCAND1.2	5.30439e-50	0.598795	0.689	0.507	1.04014e-45	Tr1 cells	SCAND1
H3-3A.1	3.41648e-35	0.59873	0.683	0.691	6.69938e-31	Th1 cells	H3-3A
UQCR10.1	1.93711e-75	0.598584	0.819	0.553	3.79848e-71	Th1 cells	UQCR10
EZR.6	5.20703e-64	0.598523	0.921	0.674	1.02105e-59	Th1 cells	EZR
SH2D1A.1	8.99667e-65	0.598194	0.528	0.272	1.76416e-60	Tr1 cells	SH2D1A
MAP2K2	4.95313e-85	0.597495	0.716	0.392	9.71259e-81	Th1 cells	MAP2K2
IDS.7	6.25758e-49	0.597421	0.807	0.61	1.22705e-44	Tr1 cells	IDS
ARAP2.2	1.78621e-68	0.596922	0.476	0.218	3.50258e-64	Tr1 cells	ARAP2
PTP4A2	9.74899e-69	0.596846	0.886	0.656	1.91168e-64	Th1 cells	PTP4A2
MPG.1	2.5422e-151	0.596647	0.579	0.191	4.98501e-147	Th1 cells	MPG
CCR6.4	3.50011e-105	0.596478	0.268	0.1	6.86336e-101	Tf regulatory cells	CCR6
CHI3L2	1.20273e-150	0.596123	0.355	0.082	2.35842e-146	Th1 cells	CHI3L2
TMBIM6.2	5.93215e-62	0.59579	0.851	0.737	1.16324e-57	Tr1 cells	TMBIM6
ETFB	9.16883e-106	0.595642	0.673	0.302	1.79792e-101	Th1 cells	ETFB
FNBP1.2	8.78497e-68	0.59523	0.83	0.555	1.72264e-63	Th1 cells	FNBP1
RBM38.1	3.15171e-76	0.59504	0.887	0.639	6.18018e-72	Th1 cells	RBM38
PSMB9.2	3.21703e-93	0.594936	0.623	0.437	6.30827e-89	Tf regulatory cells	PSMB9
NDUFB8.1	6.71871e-75	0.594598	0.83	0.601	1.31747e-70	Th1 cells	NDUFB8
PRDX5	1.06508e-81	0.594287	0.73	0.406	2.08851e-77	Th1 cells	PRDX5
BTG2.1	0	0.593907	0.899	0.817	0	Activated CD4 T cells	BTG2
CFL1.7	2.14776e-92	0.593717	0.973	0.93	4.21155e-88	Tr1 cells	CFL1
EZR.4	0	0.593656	0.869	0.653	0	Th2 cells	EZR
LAP3	6.71578e-122	0.593629	0.571	0.211	1.3169e-117	Th1 cells	LAP3
HLA-DQA1.1	3.26452e-236	0.593176	0.21	0.022	6.4014e-232	Th1 cells	HLA-DQA1
TRBC1.3	1.71347e-08	0.59242	0.227	0.178	0.000335994	Tf regulatory cells	TRBC1
MYH9.5	1.08264e-47	0.592393	0.676	0.474	2.12295e-43	Tr1 cells	MYH9
HLA-F.1	5.69089e-59	0.591862	0.823	0.662	1.11593e-54	Tr1 cells	HLA-F
CD52.4	0	0.591509	0.984	0.921	0	Th2 cells	CD52
CORO1A.1	6.11579e-103	0.590873	0.892	0.815	1.19925e-98	Tf regulatory cells	CORO1A
ACTN4.3	2.02202e-164	0.590441	0.33	0.111	3.96498e-160	Tf regulatory cells	ACTN4
VAMP8.1	2.68488e-77	0.59015	0.694	0.378	5.26478e-73	Th1 cells	VAMP8
LAIR2.2	4.06079e-87	0.590145	0.231	0.059	7.96279e-83	Th1 cells	LAIR2
LSM2	1.46083e-151	0.589766	0.535	0.167	2.86454e-147	Th1 cells	LSM2
RUNX3.4	2.74183e-76	0.588619	0.488	0.302	5.37645e-72	Tf regulatory cells	RUNX3
JUNB.1	0	0.588448	0.99	0.972	0	Activated CD4 T cells	JUNB
H2AFV.1	1.27485e-16	0.588354	0.281	0.186	2.49985e-12	Th1 cells	H2AFV
ATXN1.3	3.69923e-114	0.588047	0.571	0.218	7.25382e-110	Th1 cells	ATXN1
ITGAL	5.00325e-139	0.587941	0.5	0.156	9.81088e-135	Th1 cells	ITGAL
FGFR1	2.22833e-283	0.5878	0.279	0.033	4.36953e-279	Th1 cells	FGFR1
NEAT1.4	8.05274e-73	0.587243	0.379	0.243	1.57906e-68	Th17 cells	NEAT1
UBC.5	5.67999e-103	0.587195	0.997	0.979	1.11379e-98	Th1 cells	UBC
TGFB1.3	0	0.586805	0.763	0.526	0	Th2 cells	TGFB1
LPXN	1.11839e-129	0.586489	0.536	0.184	2.19305e-125	Th1 cells	LPXN
TUBA4A.3	1.57784e-238	0.585963	0.684	0.472	3.09399e-234	Th2 cells	TUBA4A
PTPRC.2	6.23769e-72	0.585858	0.967	0.939	1.22315e-67	Tr1 cells	PTPRC
RBPJ.1	2.27218e-49	0.585642	0.492	0.274	4.45552e-45	Tr1 cells	RBPJ
IFITM2.5	4.0545e-36	0.584791	0.823	0.724	7.95048e-32	Tr1 cells	IFITM2
LIMS1.6	1.70192e-88	0.584601	0.569	0.249	3.33729e-84	Th1 cells	LIMS1
JPT1.4	6.64174e-82	0.58445	0.592	0.277	1.30238e-77	Th1 cells	JPT1
PLK3.1	2.82423e-49	0.583562	0.695	0.474	5.53803e-45	Tr1 cells	PLK3
SLC35E1	1.18625e-106	0.582844	0.529	0.2	2.32612e-102	Th1 cells	SLC35E1
COTL1.3	0	0.582694	0.776	0.518	0	Tfh cells	COTL1
ENO1.4	7.84208e-62	0.582664	0.795	0.596	1.53775e-57	Tr1 cells	ENO1
SESN3.3	2.12868e-24	0.582655	0.575	0.406	4.17414e-20	Th1 cells	SESN3
SURF4.2	1.82385e-58	0.582397	0.476	0.245	3.57638e-54	Tr1 cells	SURF4
SMAD7.2	7.88453e-200	0.581818	0.733	0.471	1.54608e-195	Th17 cells	SMAD7
RAC2.1	8.43732e-87	0.581431	0.764	0.65	1.65447e-82	Tf regulatory cells	RAC2
CARS1	1.46831e-187	0.581207	0.325	0.061	2.87921e-183	Th1 cells	CARS1
IDH2.1	6.25037e-75	0.581204	0.436	0.185	1.22563e-70	Tr1 cells	IDH2
BRK1.3	5.73868e-50	0.580579	0.627	0.416	1.1253e-45	Tr1 cells	BRK1
RALGAPA1	6.73475e-77	0.580109	0.583	0.273	1.32062e-72	Th1 cells	RALGAPA1
ZYX.1	5.28125e-148	0.580085	0.429	0.117	1.0356e-143	Th1 cells	ZYX
CARD16.1	7.3202e-137	0.580009	0.54	0.176	1.43542e-132	Th1 cells	CARD16
CASP4.1	3.58728e-104	0.57984	0.665	0.298	7.03429e-100	Th1 cells	CASP4
NPDC1.3	0	0.579546	0.376	0.097	0	Th17 cells	NPDC1
TRPS1.1	5.13289e-90	0.578671	0.483	0.185	1.00651e-85	Th1 cells	TRPS1
SQSTM1.4	4.67629e-57	0.578508	0.68	0.444	9.16973e-53	Tr1 cells	SQSTM1
TSPO.4	1.48898e-49	0.578485	0.711	0.525	2.91974e-45	Tr1 cells	TSPO
JMJD1C.2	9.93716e-50	0.578384	0.826	0.619	1.94858e-45	Th1 cells	JMJD1C
BICDL1.2	1.97734e-71	0.578333	0.709	0.387	3.87737e-67	Th1 cells	BICDL1
PIP4K2A.1	1.65852e-56	0.578064	0.531	0.292	3.25219e-52	Tr1 cells	PIP4K2A
GNAI2.4	1.11572e-60	0.577834	0.817	0.649	2.18781e-56	Tr1 cells	GNAI2
NOSIP.3	2.36065e-33	0.577691	0.799	0.657	4.629e-29	Th1 cells	NOSIP
TPM3.2	2.00515e-62	0.577467	0.882	0.722	3.93189e-58	Th1 cells	TPM3
BCOR.1	1.1434e-97	0.576603	0.364	0.117	2.2421e-93	Tr1 cells	BCOR
ATP5MF.3	3.58107e-59	0.576283	0.627	0.396	7.02213e-55	Tr1 cells	ATP5MF
SPN	4.52178e-108	0.576148	0.494	0.178	8.86675e-104	Th1 cells	SPN
RCSD1.1	5.15597e-89	0.5757	0.551	0.234	1.01103e-84	Th1 cells	RCSD1
GSTK1.6	3.47159e-100	0.575116	0.823	0.683	6.80743e-96	Tf regulatory cells	GSTK1
ISG15.1	1.25725e-42	0.575101	0.556	0.425	2.46535e-38	Tf regulatory cells	ISG15
SRP14.1	3.67996e-111	0.573848	0.982	0.925	7.21603e-107	Th1 cells	SRP14
SELPLG	2.63824e-89	0.57372	0.422	0.23	5.17332e-85	Tf regulatory cells	SELPLG
PPP4C.1	6.16286e-91	0.57322	0.594	0.264	1.20848e-86	Th1 cells	PPP4C
SEC61B.6	2.41146e-57	0.573204	0.828	0.661	4.72863e-53	Tr1 cells	SEC61B
CASK.1	1.2271e-128	0.572766	0.393	0.17	2.40623e-124	Tf regulatory cells	CASK
OPTN.4	7.88333e-84	0.572623	0.514	0.321	1.54584e-79	Tf regulatory cells	OPTN
TMBIM6.1	3.33325e-65	0.571407	0.905	0.736	6.53616e-61	Th1 cells	TMBIM6
ARPC5L.2	9.16582e-83	0.571332	0.48	0.203	1.79733e-78	Tr1 cells	ARPC5L
CD27.4	3.87509e-37	0.571207	0.524	0.338	7.59867e-33	Tr1 cells	CD27
SIPA1	3.22781e-132	0.569527	0.516	0.168	6.3294e-128	Th1 cells	SIPA1
RAC1.1	2.77093e-73	0.569324	0.773	0.471	5.43351e-69	Th1 cells	RAC1
IDS.5	2.42091e-77	0.56926	0.757	0.608	4.74716e-73	Tf regulatory cells	IDS
PHPT1	4.80258e-58	0.568372	0.399	0.181	9.41737e-54	Tr1 cells	PHPT1
ODC1.3	4.76322e-39	0.56818	0.821	0.638	9.3402e-35	Th1 cells	ODC1
LEF1	0	0.568058	0.659	0.458	0	Naive CD4 T cells	LEF1
PPP1R14B.3	1.49888e-49	0.567791	0.542	0.296	2.93916e-45	Th1 cells	PPP1R14B
ICOS.1	0	0.567711	0.685	0.464	0	Tfh cells	ICOS
NRBP1.1	1.67277e-61	0.567599	0.489	0.246	3.28013e-57	Tr1 cells	NRBP1
PRMT2	0	0.567482	0.722	0.555	0	Naive CD4 T cells	PRMT2
TMEM245	1.43427e-86	0.567114	0.444	0.169	2.81246e-82	Th1 cells	TMEM245
ZBTB38.1	4.21142e-72	0.566908	0.367	0.142	8.25818e-68	Tr1 cells	ZBTB38
NAA50.1	3.40569e-81	0.566777	0.411	0.161	6.67822e-77	Tr1 cells	NAA50
COPE.5	4.82909e-57	0.566762	0.689	0.475	9.46937e-53	Tr1 cells	COPE
ZNHIT1.1	2.80925e-102	0.566736	0.626	0.268	5.50865e-98	Th1 cells	ZNHIT1
FTH1.5	8.07621e-82	0.566625	1	0.997	1.58366e-77	Tr1 cells	FTH1
CRIP1.4	1.56962e-266	0.566129	0.65	0.416	3.07786e-262	Th2 cells	CRIP1
KLF10.3	4.89336e-64	0.56589	0.411	0.178	9.59539e-60	Tr1 cells	KLF10
CEBPD.1	1.45445e-240	0.565847	0.18	0.016	2.85203e-236	Tr1 cells	CEBPD
AUTS2.3	1.08261e-157	0.565006	0.353	0.08	2.1229e-153	Th1 cells	AUTS2
TIGIT.2	1.30426e-86	0.564976	0.269	0.083	2.55752e-82	T regulatory cells	TIGIT
PHACTR2.3	1.71407e-81	0.564776	0.456	0.263	3.36111e-77	Tf regulatory cells	PHACTR2
DDX6.2	3.2633e-52	0.56464	0.824	0.674	6.399e-48	Tr1 cells	DDX6
LCP1.6	1.64542e-44	0.564376	0.664	0.469	3.22651e-40	Tr1 cells	LCP1
TALDO1.1	2.53563e-94	0.564071	0.545	0.228	4.97212e-90	Th1 cells	TALDO1
EVL	8.011e-85	0.564031	0.786	0.677	1.57088e-80	Tf regulatory cells	EVL
NFKB1.2	1.25197e-67	0.563257	0.674	0.374	2.45499e-63	Th1 cells	NFKB1
CD6.1	3.31025e-42	0.562446	0.717	0.537	6.49106e-38	Tr1 cells	CD6
CCR4.3	2.02668e-146	0.562029	0.29	0.095	3.97413e-142	Tf regulatory cells	CCR4
TMSB10.3	7.16227e-79	0.561798	1	0.999	1.40445e-74	Th1 cells	TMSB10
SRRT	9.44287e-102	0.561386	0.384	0.124	1.85165e-97	Th1 cells	SRRT
PREX1.4	8.81293e-69	0.561111	0.456	0.204	1.72813e-64	Tr1 cells	PREX1
TRIM8.4	5.33765e-35	0.560641	0.48	0.289	1.04666e-30	Tr1 cells	TRIM8
RPS27L.2	8.03103e-30	0.559846	0.577	0.422	1.5748e-25	Tr1 cells	RPS27L
PRNP.1	0	0.559325	0.504	0.235	0	Th2 cells	PRNP
JAK1.2	5.35126e-51	0.5593	0.857	0.739	1.04933e-46	Tr1 cells	JAK1
MYO1G.3	7.94513e-102	0.559088	0.401	0.199	1.55796e-97	Tf regulatory cells	MYO1G
CXCR4.5	4.05826e-54	0.558994	0.968	0.906	7.95783e-50	Tr1 cells	CXCR4
IQGAP1.1	5.73845e-77	0.558881	0.555	0.376	1.12525e-72	Tf regulatory cells	IQGAP1
SMCHD1.1	4.95263e-67	0.558359	0.773	0.672	9.71162e-63	Tf regulatory cells	SMCHD1
FOSL2.1	0	0.558297	0.567	0.296	0	Th2 cells	FOSL2
ELOB.2	1.25202e-47	0.558207	0.799	0.67	2.45508e-43	Tr1 cells	ELOB
MDH2.1	7.87915e-79	0.558202	0.756	0.441	1.54502e-74	Th1 cells	MDH2
ANXA2.7	7.21795e-68	0.558109	0.487	0.219	1.41537e-63	Tr1 cells	ANXA2
CORO1B.4	3.47543e-34	0.558001	0.521	0.335	6.81498e-30	Tr1 cells	CORO1B
COX6C.1	1.51369e-75	0.55788	0.947	0.845	2.9682e-71	Th1 cells	COX6C
HLA-B.4	1.57036e-209	0.557689	0.999	0.997	3.07933e-205	Tf regulatory cells	HLA-B
ARHGDIB.1	4.05208e-145	0.557521	0.982	0.959	7.94572e-141	Tf regulatory cells	ARHGDIB
MGAT4A.2	6.33138e-38	0.557519	0.739	0.559	1.24152e-33	Th1 cells	MGAT4A
SLC7A5.2	6.11908e-108	0.557433	0.417	0.135	1.19989e-103	Th1 cells	SLC7A5
SRSF9	3.3363e-77	0.557399	0.795	0.496	6.54216e-73	Th1 cells	SRSF9
MYO1F.5	5.405e-117	0.55697	0.333	0.09	1.05987e-112	Tr1 cells	MYO1F
CKLF.2	4.40958e-58	0.556892	0.363	0.156	8.64675e-54	Tr1 cells	CKLF
DDHD1	6.80744e-74	0.55676	0.463	0.282	1.33487e-69	Tf regulatory cells	DDHD1
RNF19A.3	0	0.556099	0.603	0.362	0	Tfh cells	RNF19A
APOL6.2	1.74472e-51	0.55572	0.523	0.288	3.42122e-47	Tr1 cells	APOL6
AKAP13.6	7.72933e-63	0.555236	0.84	0.609	1.51564e-58	Th1 cells	AKAP13
RAB29	1.52581e-98	0.555218	0.542	0.213	2.99197e-94	Th1 cells	RAB29
CLTB.2	1.04258e-58	0.554919	0.511	0.271	2.0444e-54	Tr1 cells	CLTB
P2RY8.2	6.07168e-51	0.554748	0.625	0.395	1.1906e-46	Tr1 cells	P2RY8
EIF4EBP1.1	4.72386e-206	0.554168	0.263	0.038	9.26301e-202	Tr1 cells	EIF4EBP1
AKNA.1	5.92486e-52	0.553897	0.488	0.267	1.16181e-47	Tr1 cells	AKNA
GRASP.3	1.90464e-216	0.553888	0.586	0.318	3.7348e-212	Th17 cells	GRASP
NPDC1.5	2.37454e-72	0.553866	0.323	0.113	4.65623e-68	Tr1 cells	NPDC1
ADGRE5.1	7.24339e-61	0.553841	0.694	0.399	1.42036e-56	Th1 cells	ADGRE5
ZC2HC1A	2.51324e-244	0.553306	0.208	0.036	4.92821e-240	Tf regulatory cells	ZC2HC1A
RAB37	1.18232e-248	0.552738	0.397	0.069	2.31842e-244	Th1 cells	RAB37
PRDX5.1	1.34774e-43	0.552479	0.599	0.408	2.64279e-39	Tr1 cells	PRDX5
CYBA.3	0	0.552333	0.953	0.802	0	Th2 cells	CYBA
ANXA5.4	0	0.552013	0.534	0.214	0	Th17 cells	ANXA5
COTL1.5	3.81906e-73	0.551883	0.714	0.559	7.4888e-69	Tf regulatory cells	COTL1
SETD2	2.03799e-83	0.551868	0.632	0.294	3.9963e-79	Th1 cells	SETD2
GADD45B.1	1.47309e-188	0.551786	0.663	0.548	2.88858e-184	Activated CD4 T cells	GADD45B
TBC1D4.5	4.83178e-50	0.551777	0.428	0.218	9.47463e-46	Tr1 cells	TBC1D4
FURIN	0	0.551709	0.418	0.149	0	Th17 cells	FURIN
ATP5IF1.2	4.823e-39	0.551668	0.741	0.599	9.45742e-35	Tr1 cells	ATP5IF1
ARID4B.2	2.31684e-58	0.551642	0.899	0.694	4.54309e-54	Th1 cells	ARID4B
RILPL2.4	4.29695e-275	0.551233	0.694	0.453	8.42589e-271	Th2 cells	RILPL2
ACTR3	2.1754e-49	0.550829	0.683	0.449	4.26574e-45	Th1 cells	ACTR3
IFI16.1	7.05436e-68	0.550812	0.704	0.393	1.38329e-63	Th1 cells	IFI16
HERPUD1.2	2.36386e-52	0.550313	0.674	0.543	4.63529e-48	Tf regulatory cells	HERPUD1
TKT	1.13709e-66	0.549698	0.719	0.419	2.22973e-62	Th1 cells	TKT
RNF115.1	5.52612e-54	0.549597	0.452	0.23	1.08362e-49	Tr1 cells	RNF115
S100A11.5	5.98041e-69	0.548948	0.669	0.472	1.1727e-64	Tf regulatory cells	S100A11
SURF4.1	6.81719e-93	0.54876	0.575	0.243	1.33678e-88	Th1 cells	SURF4
SEC11C.2	0	0.548606	0.573	0.324	0	Th2 cells	SEC11C
SH3BGRL.2	4.0151e-48	0.548351	0.689	0.486	7.87322e-44	Tr1 cells	SH3BGRL
ZBTB1.1	1.06965e-56	0.548313	0.713	0.427	2.09748e-52	Th1 cells	ZBTB1
NEDD9	4.87585e-86	0.547952	0.308	0.097	9.56105e-82	Tr1 cells	NEDD9
TAPBP.2	1.2647e-51	0.547756	0.779	0.583	2.47994e-47	Tr1 cells	TAPBP
SUMO2.1	4.96925e-87	0.547586	0.949	0.857	9.74421e-83	Th1 cells	SUMO2
TGFB1.4	1.65399e-217	0.547388	0.791	0.536	3.24331e-213	Th17 cells	TGFB1
PREX1.2	4.50788e-108	0.547099	0.414	0.201	8.83951e-104	Tf regulatory cells	PREX1
MYBL1	0	0.546845	0.284	0.046	0	Th17 cells	MYBL1
S100A10.6	1.31084e-53	0.546839	0.912	0.783	2.57042e-49	Tr1 cells	S100A10
NR4A1.1	0	0.546767	0.327	0.161	0	Activated CD4 T cells	NR4A1
ARID5B.2	0	0.546743	0.747	0.482	0	Tfh cells	ARID5B
GAPDH.4	0	0.546366	0.971	0.863	0	Th2 cells	GAPDH
CCPG1.1	8.10521e-52	0.546334	0.455	0.233	1.58935e-47	Tr1 cells	CCPG1
SUMO2.2	1.72272e-71	0.545899	0.928	0.857	3.37807e-67	Tr1 cells	SUMO2
PRELID1	4.77676e-73	0.54572	0.66	0.344	9.36674e-69	Th1 cells	PRELID1
RGS10.4	2.29023e-54	0.545619	0.851	0.692	4.49091e-50	Th1 cells	RGS10
HERPUD1.3	2.89189e-40	0.545611	0.721	0.544	5.6707e-36	Tr1 cells	HERPUD1
USP10.2	2.23314e-235	0.545553	0.461	0.209	4.37896e-231	Th17 cells	USP10
ARPC5L.1	1.11906e-104	0.545246	0.532	0.202	2.19436e-100	Th1 cells	ARPC5L
OSTF1.4	8.25076e-53	0.544912	0.473	0.248	1.61789e-48	Tr1 cells	OSTF1
CHST11.2	1.99232e-114	0.544599	0.351	0.151	3.90674e-110	Tf regulatory cells	CHST11
INPP5D.1	3.56613e-97	0.544553	0.484	0.181	6.99282e-93	Th1 cells	INPP5D
CCDC167.1	9.21535e-107	0.544471	0.383	0.12	1.80704e-102	Tr1 cells	CCDC167
LITAF	7.81293e-57	0.544273	0.9	0.704	1.53204e-52	Th1 cells	LITAF
ARPC2.5	1.86372e-117	0.544271	0.918	0.835	3.65458e-113	Tf regulatory cells	ARPC2
RARRES3.2	1.05603e-11	0.544211	0.279	0.2	2.07077e-07	Tr1 cells	RARRES3
USP15.2	1.97977e-65	0.544165	0.724	0.606	3.88214e-61	Tf regulatory cells	USP15
PSMB3.3	5.70755e-53	0.544077	0.649	0.424	1.11919e-48	Tr1 cells	PSMB3
CFL1.5	1.02223e-138	0.543571	0.966	0.929	2.0045e-134	Tf regulatory cells	CFL1
SLC38A1	8.68391e-57	0.543108	0.803	0.534	1.70283e-52	Th1 cells	SLC38A1
SEM1.2	5.33194e-52	0.542791	0.684	0.469	1.04554e-47	Tr1 cells	SEM1
RAB5IF.1	5.34731e-55	0.542598	0.472	0.247	1.04855e-50	Tr1 cells	RAB5IF
SRSF7.2	8.85212e-43	0.542048	0.941	0.912	1.73581e-38	Tr1 cells	SRSF7
SRGN.3	0	0.541893	0.996	0.952	0	Th2 cells	SRGN
F2R	0	0.54183	0.295	0.023	0	Th1 cells	F2R
ENC1.1	6.90926e-142	0.541002	0.24	0.044	1.35484e-137	Tr1 cells	ENC1
FAM177A1.3	3.73631e-39	0.540829	0.895	0.758	7.32654e-35	Th1 cells	FAM177A1
AKNA	6.14375e-82	0.54044	0.59	0.266	1.20473e-77	Th1 cells	AKNA
ZNF791	5.93835e-78	0.540231	0.61	0.288	1.16445e-73	Th1 cells	ZNF791
IL2RG.4	1.27966e-69	0.540211	0.661	0.519	2.50929e-65	Tf regulatory cells	IL2RG
CD247.3	2.15861e-44	0.54014	0.815	0.659	4.23282e-40	Tr1 cells	CD247
ZNF282	0	0.539926	0.245	0.023	0	Tr1 cells	ZNF282
DUSP16	1.55264e-100	0.53991	0.37	0.174	3.04458e-96	Tf regulatory cells	DUSP16
ATP5F1A	7.84927e-58	0.539835	0.771	0.538	1.53916e-53	Th1 cells	ATP5F1A
TC2N.1	8.27932e-46	0.539723	0.599	0.378	1.62349e-41	Tr1 cells	TC2N
SUMO1.1	1.08671e-76	0.539476	0.803	0.512	2.13093e-72	Th1 cells	SUMO1
ARPC4.2	5.19315e-49	0.539357	0.6	0.379	1.01833e-44	Tr1 cells	ARPC4
GRB2	5.33881e-73	0.539348	0.712	0.387	1.04689e-68	Th1 cells	GRB2
GDE1	4.93938e-87	0.539045	0.316	0.1	9.68563e-83	Tr1 cells	GDE1
IKZF2.1	0	0.538654	0.204	0.018	0	Tf regulatory cells	IKZF2
CHST12.1	1.27237e-119	0.538585	0.293	0.071	2.49499e-115	Tr1 cells	CHST12
TNFRSF25	1.42551e-213	0.538462	0.625	0.36	2.79528e-209	Th17 cells	TNFRSF25
PDE4A	5.98021e-254	0.538349	0.251	0.029	1.17266e-249	Th1 cells	PDE4A
SRSF5	6.04796e-65	0.537593	0.959	0.904	1.18595e-60	Tr1 cells	SRSF5
UBB.2	6.82599e-90	0.537427	0.982	0.91	1.33851e-85	Th1 cells	UBB
IL2RG.5	2.87296e-62	0.537368	0.796	0.519	5.63359e-58	Th1 cells	IL2RG
IQGAP2.4	7.19086e-61	0.537234	0.625	0.337	1.41006e-56	Th1 cells	IQGAP2
CLTA	6.29198e-72	0.537152	0.661	0.355	1.2338e-67	Th1 cells	CLTA
CAPZA1.1	2.42149e-47	0.536656	0.685	0.482	4.7483e-43	Tr1 cells	CAPZA1
ATP6V1F.1	1.90834e-77	0.536325	0.671	0.348	3.74206e-73	Th1 cells	ATP6V1F
NDUFB3	3.53172e-85	0.536314	0.543	0.239	6.92536e-81	Th1 cells	NDUFB3
PIK3R1.1	0	0.536228	0.764	0.576	0	Tfh cells	PIK3R1
AP2M1.1	2.73028e-75	0.536124	0.697	0.377	5.35382e-71	Th1 cells	AP2M1
CLIC3.1	1.59321e-182	0.536115	0.193	0.024	3.12413e-178	Tr1 cells	CLIC3
ARHGAP9.1	1.29333e-58	0.535842	0.497	0.258	2.53608e-54	Tr1 cells	ARHGAP9
TBC1D10C	9.57095e-58	0.535464	0.727	0.428	1.87677e-53	Th1 cells	TBC1D10C
MT-CO2	8.90354e-123	0.535302	0.999	0.996	1.74589e-118	Th1 cells	MT-CO2
ZCRB1	5.0448e-84	0.535228	0.584	0.258	9.89234e-80	Th1 cells	ZCRB1
IKZF3.1	1.79991e-86	0.535172	0.457	0.175	3.52945e-82	Th1 cells	IKZF3
TRAC.3	4.00618e-75	0.535002	0.388	0.247	7.85571e-71	Th17 cells	TRAC
IKZF2	1.87414e-236	0.534725	0.191	0.021	3.67499e-232	T regulatory cells	IKZF2
CEBPB.1	1.07701e-30	0.534401	0.511	0.335	2.11191e-26	Tr1 cells	CEBPB
MOB3A.1	1.70871e-80	0.534053	0.381	0.141	3.35061e-76	Tr1 cells	MOB3A
F5	6.61763e-279	0.533938	0.215	0.035	1.29765e-274	Tf regulatory cells	F5
ATP1B3.3	1.66425e-272	0.533914	0.601	0.401	3.26343e-268	Tfh cells	ATP1B3
PDXK.1	1.31436e-79	0.53333	0.38	0.143	2.57734e-75	Tr1 cells	PDXK
CD58.3	2.22982e-147	0.53312	0.319	0.07	4.37245e-143	Tr1 cells	CD58
CCDC107.1	0	0.532847	0.419	0.146	0	Th17 cells	CCDC107
TOX	7.8807e-198	0.532774	0.244	0.057	1.54533e-193	Tf regulatory cells	TOX
FLNA.4	2.4028e-253	0.532714	0.607	0.31	4.71166e-249	Th17 cells	FLNA
SKAP1	1.39811e-69	0.532597	0.595	0.431	2.74154e-65	Tf regulatory cells	SKAP1
PPP1R18.2	3.18809e-76	0.532257	0.425	0.173	6.25152e-72	Tr1 cells	PPP1R18
PECAM1	0	0.532221	0.329	0.04	0	Th1 cells	PECAM1
RASGRP1	1.18773e-58	0.531938	0.581	0.431	2.32902e-54	Tf regulatory cells	RASGRP1
RUNX3.2	3.00931e-303	0.531761	0.522	0.28	5.90095e-299	Th2 cells	RUNX3
RBX1.2	2.74968e-67	0.531626	0.738	0.437	5.39184e-63	Th1 cells	RBX1
TXN.5	2.00141e-68	0.531509	0.593	0.426	3.92456e-64	Tf regulatory cells	TXN
NOP10	2.6596e-65	0.531341	0.664	0.371	5.21521e-61	Th1 cells	NOP10
XAF1.1	5.61243e-69	0.53123	0.416	0.166	1.10054e-64	Th1 cells	XAF1
TAX1BP1.1	2.13891e-61	0.531228	0.808	0.541	4.19418e-57	Th1 cells	TAX1BP1
SRA1.1	1.57862e-70	0.531016	0.425	0.183	3.09552e-66	Tr1 cells	SRA1
MX1.1	5.30872e-44	0.530426	0.443	0.229	1.04099e-39	Th1 cells	MX1
FTH1.3	0	0.529942	1	0.997	0	Th2 cells	FTH1
NDUFC2	4.70973e-67	0.529816	0.747	0.467	9.23531e-63	Th1 cells	NDUFC2
SYAP1.3	2.30452e-37	0.529229	0.697	0.521	4.51893e-33	Tr1 cells	SYAP1
YWHAQ.3	1.246e-219	0.529093	0.696	0.413	2.44329e-215	Th17 cells	YWHAQ
RAB29.1	1.20619e-54	0.528782	0.44	0.214	2.36522e-50	Tr1 cells	RAB29
PSMD13	1.94593e-100	0.528623	0.616	0.259	3.81578e-96	Th1 cells	PSMD13
RAC1.2	5.23731e-45	0.528596	0.669	0.473	1.02698e-40	Tr1 cells	RAC1
YARS1.1	1.07652e-82	0.528318	0.272	0.081	2.11094e-78	Tr1 cells	YARS1
PPP1R14B.4	6.38334e-30	0.527598	0.461	0.298	1.25171e-25	Tr1 cells	PPP1R14B
HDAC1	5.59462e-83	0.527562	0.582	0.264	1.09705e-78	Th1 cells	HDAC1
RGCC.2	5.06605e-43	0.527394	0.925	0.819	9.93402e-39	Tr1 cells	RGCC
HMGB2.1	6.27495e-68	0.527181	0.719	0.577	1.23045e-63	Tf regulatory cells	HMGB2
PSMB6	6.27072e-68	0.527046	0.69	0.388	1.22962e-63	Th1 cells	PSMB6
COX5B.1	5.35632e-69	0.526971	0.896	0.699	1.05032e-64	Th1 cells	COX5B
SCAF11	2.91528e-49	0.52659	0.829	0.599	5.71657e-45	Th1 cells	SCAF11
BSG.1	7.48397e-59	0.526184	0.531	0.281	1.46753e-54	Tr1 cells	BSG
SH3GLB1.1	4.54634e-77	0.525945	0.603	0.29	8.91492e-73	Th1 cells	SH3GLB1
FAS.1	2.34898e-106	0.525907	0.303	0.123	4.60611e-102	Tf regulatory cells	FAS
POLR2G	3.32669e-94	0.525729	0.548	0.223	6.52331e-90	Th1 cells	POLR2G
VDAC1.1	3.51607e-42	0.524864	0.649	0.442	6.89466e-38	Tr1 cells	VDAC1
DIAPH1.1	1.59586e-78	0.524731	0.568	0.256	3.12931e-74	Th1 cells	DIAPH1
GNA15.2	0	0.524577	0.314	0.066	0	Th17 cells	GNA15
ACOT9.2	5.08208e-120	0.524308	0.317	0.081	9.96546e-116	Tr1 cells	ACOT9
RAB2A.1	4.83517e-41	0.524222	0.644	0.444	9.48128e-37	Tr1 cells	RAB2A
NFATC1	2.94765e-80	0.524127	0.455	0.177	5.78005e-76	Th1 cells	NFATC1
SEC61B.5	1.53834e-65	0.523429	0.878	0.66	3.01653e-61	Th1 cells	SEC61B
SCP2.1	5.06428e-89	0.523311	0.649	0.298	9.93055e-85	Th1 cells	SCP2
CHCHD5	3.05399e-97	0.523236	0.509	0.191	5.98858e-93	Th1 cells	CHCHD5
UBL5.2	1.33574e-43	0.523167	0.773	0.619	2.61925e-39	Tr1 cells	UBL5
UBE2L3	1.4514e-64	0.523059	0.731	0.447	2.84606e-60	Th1 cells	UBE2L3
CORO1B.2	0	0.523008	0.533	0.295	0	Tfh cells	CORO1B
CLIC3	6.4492e-186	0.522552	0.194	0.024	1.26462e-181	Th1 cells	CLIC3
PTPN2.1	1.75004e-41	0.522522	0.567	0.369	3.43166e-37	Tr1 cells	PTPN2
CCDC12.1	3.81589e-49	0.522263	0.641	0.434	7.48258e-45	Tr1 cells	CCDC12
LGALS9.1	6.9609e-175	0.522121	0.378	0.083	1.36496e-170	Th1 cells	LGALS9
JUN.5	2.37069e-32	0.521855	0.909	0.819	4.64869e-28	Tr1 cells	JUN
YWHAB.5	2.00098e-70	0.521812	0.939	0.777	3.92372e-66	Th1 cells	YWHAB
TAGLN2.4	0	0.521784	0.934	0.788	0	Th2 cells	TAGLN2
PARVG	2.43865e-158	0.521572	0.44	0.115	4.78195e-154	Th1 cells	PARVG
METRNL.3	0	0.521275	0.31	0.082	0	Th2 cells	METRNL
GNA15.3	4.94018e-98	0.521214	0.291	0.08	9.68719e-94	Tr1 cells	GNA15
NDUFA1.1	2.33003e-59	0.521091	0.831	0.615	4.56896e-55	Th1 cells	NDUFA1
CD5.1	6.90621e-40	0.52067	0.607	0.409	1.35424e-35	Tr1 cells	CD5
KLF6.2	7.64936e-279	0.520502	0.962	0.832	1.49996e-274	Th2 cells	KLF6
APOBEC3C.1	3.33371e-110	0.520305	0.292	0.075	6.53707e-106	Tr1 cells	APOBEC3C
SEC11C.5	3.44866e-54	0.520269	0.599	0.349	6.76248e-50	Tr1 cells	SEC11C
NSD3	2.13345e-80	0.519645	0.767	0.642	4.18349e-76	Tf regulatory cells	NSD3
DNPH1.2	1.83352e-58	0.519335	0.392	0.176	3.59535e-54	Tr1 cells	DNPH1
GTF3C6.1	4.09817e-76	0.518765	0.605	0.301	8.0361e-72	Th1 cells	GTF3C6
KDM6B.2	4.93343e-38	0.518095	0.648	0.458	9.67397e-34	Tr1 cells	KDM6B
RIC8A.1	2.06757e-79	0.517634	0.372	0.135	4.05429e-75	Tr1 cells	RIC8A
AC004585.1	4.51244e-290	0.517607	0.149	0.009	8.84845e-286	Th1 cells	AC004585.1
NAP1L4	1.70592e-61	0.517587	0.669	0.375	3.34513e-57	Th1 cells	NAP1L4
IER5.1	1.47518e-257	0.517539	0.789	0.566	2.89268e-253	Th2 cells	IER5
GRK2	2.03936e-72	0.517427	0.642	0.323	3.99897e-68	Th1 cells	GRK2
NDUFA13.1	1.69648e-43	0.517321	0.564	0.358	3.32663e-39	Tr1 cells	NDUFA13
FLNA.3	0	0.516963	0.565	0.3	0	Th2 cells	FLNA
HNRNPC	3.22543e-63	0.51669	0.895	0.757	6.32474e-59	Th1 cells	HNRNPC
PHLDA1.1	0	0.516296	0.278	0.083	0	Th2 cells	PHLDA1
SH3GLB1.2	2.47061e-46	0.516176	0.507	0.292	4.84462e-42	Tr1 cells	SH3GLB1
ITGAE	4.65911e-140	0.51589	0.427	0.118	9.13605e-136	Th1 cells	ITGAE
IFI16	6.61585e-55	0.515757	0.544	0.393	1.2973e-50	Tf regulatory cells	IFI16
UPP1.1	1.12209e-24	0.515584	0.513	0.363	2.2003e-20	Tr1 cells	UPP1
MCUB.1	3.27492e-57	0.515259	0.814	0.604	6.4218e-53	Th1 cells	MCUB
TCF25.2	1.03363e-37	0.514899	0.648	0.473	2.02685e-33	Tr1 cells	TCF25
ZBTB1.2	1.33275e-33	0.514805	0.604	0.429	2.61339e-29	Tr1 cells	ZBTB1
ATP5PF	2.25098e-61	0.514533	0.775	0.527	4.41395e-57	Th1 cells	ATP5PF
DOK2	2.35416e-59	0.51441	0.431	0.274	4.61628e-55	Tf regulatory cells	DOK2
ID2.4	1.80971e-129	0.514402	0.701	0.492	3.54866e-125	Th17 cells	ID2
GSTK1.4	5.76685e-293	0.514221	0.847	0.666	1.13082e-288	Th2 cells	GSTK1
ARHGEF1.1	5.71537e-56	0.51419	0.792	0.498	1.12073e-51	Th1 cells	ARHGEF1
GMFG.1	1.82581e-92	0.514084	0.893	0.845	3.58023e-88	Tf regulatory cells	GMFG
OGT	4.83144e-70	0.514042	0.531	0.24	9.47398e-66	Th1 cells	OGT
BST2.1	2.34709e-43	0.513979	0.392	0.2	4.60241e-39	Tr1 cells	BST2
ARID4B.3	9.98898e-44	0.513918	0.832	0.695	1.95874e-39	Tr1 cells	ARID4B
SELENOS.1	5.24959e-42	0.513487	0.56	0.346	1.02939e-37	Tr1 cells	SELENOS
BAX.1	9.689e-69	0.512799	0.655	0.332	1.89992e-64	Th1 cells	BAX
MRPL51	3.63019e-87	0.512756	0.604	0.273	7.11844e-83	Th1 cells	MRPL51
CD84.1	1.57659e-87	0.512446	0.364	0.119	3.09153e-83	Th1 cells	CD84
H3-3A.2	5.86859e-20	0.512429	0.661	0.692	1.15077e-15	Tr1 cells	H3-3A
SRGN.2	0	0.512309	0.994	0.949	0	Tfh cells	SRGN
SPON2	1.05617e-190	0.512239	0.271	0.043	2.07104e-186	Th1 cells	SPON2
MYO1G.4	8.88948e-97	0.512174	0.522	0.201	1.74314e-92	Th1 cells	MYO1G
CAP1.3	7.24194e-42	0.511921	0.577	0.372	1.42007e-37	Tr1 cells	CAP1
IQGAP1.3	5.93968e-41	0.511658	0.581	0.379	1.16471e-36	Tr1 cells	IQGAP1
GLIPR1.2	3.72139e-240	0.511418	0.528	0.311	7.29727e-236	Th2 cells	GLIPR1
ITGA4.1	8.11072e-293	0.511267	0.512	0.309	1.59043e-288	Tfh cells	ITGA4
GZMH.1	3.25362e-145	0.511258	0.136	0.015	6.38003e-141	Tr1 cells	GZMH
SIPA1.1	2.8365e-65	0.511079	0.399	0.171	5.56208e-61	Tr1 cells	SIPA1
GNA15.1	0	0.510822	0.277	0.058	0	Th2 cells	GNA15
UQCRC2	1.36535e-74	0.510404	0.681	0.354	2.67732e-70	Th1 cells	UQCRC2
THRAP3.1	3.29917e-43	0.510304	0.681	0.474	6.46934e-39	Tr1 cells	THRAP3
FNBP1.3	3.31662e-43	0.510041	0.736	0.557	6.50356e-39	Tr1 cells	FNBP1
DIP2A	1.68927e-81	0.509874	0.462	0.183	3.3125e-77	Th1 cells	DIP2A
VASP.2	4.61139e-96	0.509409	0.506	0.194	9.04248e-92	Th1 cells	VASP
H3-3B.3	1.81384e-19	0.509248	0.663	0.702	3.55676e-15	Tr1 cells	H3-3B
SCAND1.1	2.68296e-63	0.508869	0.786	0.506	5.26102e-59	Th1 cells	SCAND1
HMGN2.2	5.44048e-20	0.508558	0.847	0.753	1.06682e-15	Th1 cells	HMGN2
MRFAP1.1	2.72611e-31	0.50851	0.636	0.491	5.34563e-27	Tr1 cells	MRFAP1
RBCK1	1.81261e-89	0.508404	0.591	0.254	3.55434e-85	Th1 cells	RBCK1
ANXA1.3	6.84612e-204	0.508178	0.76	0.605	1.34246e-199	Tfh cells	ANXA1
LAPTM4A.2	1.80521e-42	0.507973	0.587	0.37	3.53983e-38	Tr1 cells	LAPTM4A
PIK3R1.3	8.70906e-44	0.507914	0.703	0.607	1.70776e-39	Tf regulatory cells	PIK3R1
LAMTOR1	5.86877e-72	0.507636	0.684	0.369	1.15081e-67	Th1 cells	LAMTOR1
PPP1R2	3.64111e-28	0.506793	0.733	0.606	7.13986e-24	Tr1 cells	PPP1R2
AGO2	7.86315e-56	0.506704	0.605	0.332	1.54189e-51	Th1 cells	AGO2
TUT7.1	9.97017e-63	0.506644	0.361	0.147	1.95505e-58	Tr1 cells	TUT7
GALNT11	4.1692e-136	0.506427	0.371	0.096	8.17539e-132	Th1 cells	GALNT11
RHOF	6.84249e-71	0.506206	0.706	0.38	1.34174e-66	Th1 cells	RHOF
PRDX1.2	2.17569e-269	0.505796	0.647	0.415	4.26631e-265	Th2 cells	PRDX1
NDUFB7	2.25488e-67	0.505431	0.678	0.374	4.42159e-63	Th1 cells	NDUFB7
PIK3IP1.1	2.88736e-59	0.505067	0.92	0.822	5.66182e-55	T regulatory cells	PIK3IP1
CD63.1	0	0.504679	0.429	0.185	0	Th2 cells	CD63
HLA-C.2	0	0.504637	0.999	0.993	0	Th2 cells	HLA-C
MACF1.1	9.06278e-49	0.504185	0.577	0.317	1.77712e-44	Th1 cells	MACF1
MAP2K3.1	5.50401e-87	0.504107	0.352	0.119	1.07928e-82	Tr1 cells	MAP2K3
PSMB3.1	6.71272e-72	0.504031	0.587	0.422	1.3163e-67	Tf regulatory cells	PSMB3
VIM.6	1.64081e-35	0.503862	0.947	0.934	3.21746e-31	Th1 cells	VIM
RHOH.2	3.95559e-45	0.503628	0.851	0.648	7.75651e-41	Th1 cells	RHOH
NOP58.1	4.08214e-48	0.503593	0.778	0.541	8.00467e-44	Th1 cells	NOP58
CAPZB.4	2.5536e-40	0.503471	0.78	0.651	5.00736e-36	Tr1 cells	CAPZB
CALM1.3	2.52728e-90	0.503459	0.993	0.987	4.95574e-86	Tr1 cells	CALM1
CD3G.2	2.49097e-43	0.503445	0.869	0.772	4.88454e-39	Tr1 cells	CD3G
REEP5.3	1.04023e-269	0.503247	0.548	0.253	2.03979e-265	Th17 cells	REEP5
WNK1.1	9.54728e-65	0.502889	0.621	0.321	1.87213e-60	Th1 cells	WNK1
ZBTB7A	9.18225e-69	0.502605	0.568	0.27	1.80055e-64	Th1 cells	ZBTB7A
ATP2B4.2	9.17115e-78	0.502213	0.332	0.115	1.79837e-73	Tr1 cells	ATP2B4
CYBA.4	1.40106e-248	0.502197	0.958	0.809	2.74733e-244	Th17 cells	CYBA
LY6E.6	8.6404e-36	0.502138	0.721	0.525	1.6943e-31	Th1 cells	LY6E
RB1CC1	5.10744e-48	0.501715	0.661	0.395	1.00152e-43	Th1 cells	RB1CC1
TIGIT.6	3.87712e-70	0.501601	0.268	0.084	7.60264e-66	Tr1 cells	TIGIT
P4HB.1	1.9408e-284	0.501357	0.587	0.35	3.80571e-280	Th2 cells	P4HB
SEPT7.1	7.98994e-10	0.500935	0.294	0.223	1.56675e-05	Th1 cells	2007-09-01
SEC11A.1	7.07273e-64	0.500935	0.679	0.374	1.38689e-59	Th1 cells	SEC11A
PAFAH1B1.1	2.51278e-35	0.5004	0.593	0.419	4.92732e-31	Tr1 cells	PAFAH1B1
LMO4	0	0.500345	0.236	0.055	0	Th2 cells	LMO4
ZNF292	1.9895e-48	0.500214	0.557	0.422	3.90121e-44	Tf regulatory cells	ZNF292
PGAM1.3	9.82881e-60	0.499923	0.599	0.326	1.92733e-55	Th1 cells	PGAM1
DNAJB6.2	6.75906e-50	0.499511	0.856	0.616	1.32538e-45	Th1 cells	DNAJB6
NCF1	1.60913e-42	0.499434	0.38	0.19	3.15535e-38	Tr1 cells	NCF1
YWHAQ.6	5.64146e-40	0.498866	0.624	0.429	1.10623e-35	Tr1 cells	YWHAQ
SYNE1	1.0017e-73	0.49885	0.469	0.192	1.96424e-69	Th1 cells	SYNE1
RTF1.2	4.31334e-39	0.498798	0.571	0.362	8.45803e-35	Tr1 cells	RTF1
SLBP	2.24911e-58	0.49863	0.579	0.295	4.41027e-54	Th1 cells	SLBP
ECH1.1	1.69956e-89	0.498613	0.588	0.256	3.33267e-85	Th1 cells	ECH1
KLF6.1	0	0.498399	0.943	0.826	0	Tfh cells	KLF6
IKZF1	0	0.498352	0.813	0.685	0	Naive CD4 T cells	IKZF1
RAP1A	1.12036e-72	0.498241	0.632	0.466	2.19692e-68	Tf regulatory cells	RAP1A
TSPO.2	1.56601e-62	0.498117	0.657	0.523	3.0708e-58	Tf regulatory cells	TSPO
FTH1.2	0	0.497948	1	0.997	0	Tfh cells	FTH1
TAF10	1.46289e-58	0.497852	0.764	0.497	2.86858e-54	Th1 cells	TAF10
H2AJ	3.38679e-72	0.496998	0.417	0.167	6.64116e-68	Th1 cells	H2AJ
RNF7.1	3.59072e-41	0.49698	0.661	0.475	7.04104e-37	Tr1 cells	RNF7
GTF3C1	8.13326e-168	0.496909	0.327	0.066	1.59485e-163	Th1 cells	GTF3C1
ANXA11.1	4.18673e-61	0.496858	0.729	0.44	8.20976e-57	Th1 cells	ANXA11
CASP8.2	1.58065e-37	0.496821	0.583	0.387	3.09949e-33	Tr1 cells	CASP8
MAPKAPK2.2	1.18822e-67	0.496744	0.415	0.178	2.32998e-63	Tr1 cells	MAPKAPK2
BACH1	5.89205e-76	0.496465	0.307	0.148	1.15537e-71	Tf regulatory cells	BACH1
NDUFA1.2	1.48999e-42	0.496452	0.752	0.616	2.92171e-38	Tr1 cells	NDUFA1
DUSP1.1	2.46118e-270	0.496342	0.874	0.769	4.82612e-266	Activated CD4 T cells	DUSP1
RHOA.2	1.1236e-43	0.496132	0.792	0.628	2.20326e-39	Tr1 cells	RHOA
CRIP1.6	4.21324e-50	0.495889	0.591	0.438	8.26175e-46	Tf regulatory cells	CRIP1
CHMP2A.1	1.12084e-66	0.495292	0.562	0.276	2.19785e-62	Th1 cells	CHMP2A
PPP1R12A.1	3.84542e-58	0.495182	0.631	0.34	7.54048e-54	Th1 cells	PPP1R12A
ERN1.1	0	0.494799	0.367	0.124	0	Th17 cells	ERN1
IL4I1	0	0.494472	0.213	0.005	0	Th17 cells	IL4I1
MT-CO1.3	1.78965e-90	0.494299	0.999	0.996	3.50933e-86	Tr1 cells	MT-CO1
HSPA5.2	1.54006e-236	0.493995	0.869	0.705	3.01991e-232	Th2 cells	HSPA5
OASL	1.74489e-158	0.493815	0.305	0.061	3.42156e-154	Th1 cells	OASL
KDM6B.1	8.8617e-34	0.493762	0.674	0.457	1.73769e-29	Th1 cells	KDM6B
RAP2B	4.93962e-38	0.493563	0.467	0.273	9.6861e-34	Tr1 cells	RAP2B
STK4.1	5.22245e-78	0.493324	0.898	0.823	1.02407e-73	Tf regulatory cells	STK4
COX7A2	1.98156e-62	0.492961	0.905	0.764	3.88564e-58	Th1 cells	COX7A2
PHACTR2.5	2.14925e-39	0.492888	0.465	0.266	4.21447e-35	Tr1 cells	PHACTR2
BRD1	1.74201e-67	0.492566	0.564	0.269	3.41591e-63	Th1 cells	BRD1
SAMD3.1	1.18678e-58	0.492234	0.315	0.122	2.32716e-54	Tr1 cells	SAMD3
IDS.3	1.31736e-277	0.491993	0.812	0.586	2.58322e-273	Th2 cells	IDS
TIPRL	7.73758e-77	0.491413	0.542	0.239	1.51726e-72	Th1 cells	TIPRL
RNF145	1.39583e-39	0.491317	0.565	0.368	2.73709e-35	Tr1 cells	RNF145
H2AZ2.1	1.26277e-17	0.491181	0.509	0.413	2.47616e-13	Tr1 cells	H2AZ2
GIMAP4.1	1.05008e-52	0.491125	0.54	0.288	2.0591e-48	Th1 cells	GIMAP4
ZNF267	6.15358e-34	0.49094	0.452	0.272	1.20666e-29	Tr1 cells	ZNF267
ITM2C	1.05784e-23	0.490743	0.173	0.102	2.07431e-19	Tf regulatory cells	ITM2C
HERPUD1.1	9.42757e-237	0.490686	0.729	0.523	1.84865e-232	Th2 cells	HERPUD1
HLA-DPB1.3	0	0.490633	0.436	0.198	0	Th2 cells	HLA-DPB1
ATP6V0B.2	5.65066e-50	0.490632	0.508	0.279	1.10804e-45	Tr1 cells	ATP6V0B
SQSTM1.3	5.27782e-51	0.490443	0.583	0.443	1.03493e-46	Tf regulatory cells	SQSTM1
GBP4	2.80856e-77	0.490358	0.477	0.194	5.50731e-73	Th1 cells	GBP4
HCLS1	1.76215e-62	0.490259	0.619	0.479	3.4554e-58	Tf regulatory cells	HCLS1
LCK	1.59971e-69	0.490214	0.7	0.559	3.13686e-65	Tf regulatory cells	LCK
TBCB.4	1.45042e-48	0.49015	0.521	0.293	2.84413e-44	Tr1 cells	TBCB
IL10RA.5	1.12412e-45	0.490025	0.481	0.263	2.20429e-41	Tr1 cells	IL10RA
FAM160B1.2	3.7241e-96	0.48971	0.423	0.145	7.30259e-92	Th1 cells	FAM160B1
KPNA2.1	1.48916e-34	0.489682	0.388	0.213	2.9201e-30	Tr1 cells	KPNA2
ABI1.2	2.89424e-39	0.489367	0.447	0.255	5.67531e-35	Tr1 cells	ABI1
SESN3	2.9239e-43	0.489264	0.605	0.405	5.73347e-39	T regulatory cells	SESN3
COX7B	1.54878e-53	0.48922	0.792	0.586	3.037e-49	Th1 cells	COX7B
PLEKHF1	1.39718e-82	0.489013	0.276	0.082	2.73973e-78	Tr1 cells	PLEKHF1
CNOT6L.1	3.15979e-41	0.488525	0.873	0.779	6.19602e-37	Tr1 cells	CNOT6L
RALGAPA1.1	2.89136e-40	0.488343	0.48	0.274	5.66966e-36	Tr1 cells	RALGAPA1
COX5A.5	1.4666e-39	0.48811	0.596	0.403	2.87586e-35	Tr1 cells	COX5A
ATP6V0E1.3	7.18402e-54	0.487924	0.81	0.562	1.40872e-49	Th1 cells	ATP6V0E1
PTPRE.1	9.67254e-64	0.487758	0.371	0.15	1.89669e-59	Tr1 cells	PTPRE
SOCS3	3.66514e-217	0.487676	0.739	0.63	7.18697e-213	Activated CD4 T cells	SOCS3
HLA-E.2	9.31149e-91	0.48767	0.995	0.986	1.82589e-86	Tr1 cells	HLA-E
PDCL3.1	1.15737e-38	0.487619	0.472	0.269	2.26949e-34	Tr1 cells	PDCL3
EML4.5	6.65328e-64	0.4876	0.708	0.565	1.30464e-59	Tf regulatory cells	EML4
STK24.2	3.08772e-43	0.48741	0.472	0.267	6.05471e-39	Tr1 cells	STK24
ADGRE5.2	7.95562e-35	0.487218	0.585	0.4	1.56002e-30	Tr1 cells	ADGRE5
BUB3	5.43072e-59	0.48655	0.529	0.374	1.06491e-54	Tf regulatory cells	BUB3
FIBP	7.51493e-120	0.48649	0.492	0.163	1.4736e-115	Th1 cells	FIBP
ARHGAP9	5.2786e-77	0.486441	0.575	0.256	1.03508e-72	Th1 cells	ARHGAP9
BCL9L.1	2.3843e-36	0.486437	0.515	0.319	4.67537e-32	Tr1 cells	BCL9L
ARL6IP4	6.5549e-54	0.485988	0.903	0.725	1.28535e-49	Th1 cells	ARL6IP4
USP46.1	0	0.485681	0.263	0.06	0	Th2 cells	USP46
SLC9A3R1	1.04452e-107	0.485536	0.457	0.153	2.04821e-103	Th1 cells	SLC9A3R1
LY6E.5	1.72457e-48	0.485483	0.641	0.524	3.3817e-44	Tf regulatory cells	LY6E
CMIP	3.17913e-133	0.485322	0.373	0.097	6.23395e-129	Th1 cells	CMIP
NDUFB2	4.29817e-53	0.485229	0.797	0.56	8.42828e-49	Th1 cells	NDUFB2
CST7.4	2.36019e-77	0.48512	0.315	0.147	4.6281e-73	Tf regulatory cells	CST7
MCL1.4	7.58886e-46	0.484944	0.873	0.679	1.4881e-41	Th1 cells	MCL1
ICAM3.3	1.89218e-41	0.484615	0.793	0.633	3.71037e-37	Tr1 cells	ICAM3
DYNLRB1.1	3.37972e-62	0.484544	0.665	0.371	6.6273e-58	Th1 cells	DYNLRB1
COPS9	6.37229e-54	0.48418	0.738	0.478	1.24954e-49	Th1 cells	COPS9
ANP32A	7.87079e-73	0.484109	0.594	0.287	1.54338e-68	Th1 cells	ANP32A
BCL3	9.08221e-64	0.484096	0.427	0.257	1.78093e-59	Tf regulatory cells	BCL3
SLC38A2.1	3.75638e-38	0.484042	0.733	0.552	7.36589e-34	Tr1 cells	SLC38A2
MACF1.2	1.6326e-35	0.483871	0.516	0.318	3.20136e-31	Tr1 cells	MACF1
CD83.1	2.74259e-23	0.483803	0.339	0.202	5.37794e-19	Tr1 cells	CD83
TRMT112.1	4.88478e-33	0.483691	0.697	0.547	9.57856e-29	Tr1 cells	TRMT112
CLIC1.3	1.60707e-248	0.48361	0.668	0.357	3.15131e-244	Th17 cells	CLIC1
PIM1.2	5.9356e-22	0.483202	0.564	0.43	1.16391e-17	Tr1 cells	PIM1
TMF1	1.84624e-50	0.482694	0.692	0.414	3.6203e-46	Th1 cells	TMF1
FXYD5.2	0	0.482672	0.967	0.886	0	Th2 cells	FXYD5
OPTN.5	1.66156e-53	0.482451	0.59	0.323	3.25815e-49	Th1 cells	OPTN
GNAI2.2	4.8331e-70	0.481015	0.754	0.648	9.47722e-66	Tf regulatory cells	GNAI2
LUZP1	1.06497e-70	0.480314	0.329	0.118	2.08831e-66	Tr1 cells	LUZP1
COTL1.4	9.38887e-296	0.480142	0.779	0.536	1.84106e-291	Th2 cells	COTL1
CHCHD2.1	1.16073e-67	0.480057	0.97	0.898	2.27607e-63	Th1 cells	CHCHD2
LDLRAD4.1	2.93146e-98	0.48002	0.384	0.122	5.74829e-94	Th1 cells	LDLRAD4
ODF2L	4.07784e-154	0.479976	0.587	0.357	7.99623e-150	Th17 cells	ODF2L
IFITM2.3	1.89195e-221	0.479952	0.859	0.707	3.70993e-217	Th2 cells	IFITM2
RNF115	3.30484e-76	0.479838	0.529	0.228	6.48045e-72	Th1 cells	RNF115
NDUFC2.1	7.49125e-37	0.479822	0.655	0.468	1.46896e-32	Tr1 cells	NDUFC2
DYNLRB1.2	8.78637e-35	0.479336	0.555	0.373	1.72292e-30	Tr1 cells	DYNLRB1
NAMPT.2	7.90444e-37	0.478991	0.518	0.408	1.54998e-32	Tf regulatory cells	NAMPT
AIF1	0	0.478889	0.393	0.2	0	Naive CD4 T cells	AIF1
PRKCB.1	9.53922e-65	0.478491	0.571	0.276	1.87055e-60	Th1 cells	PRKCB
CRIP1.5	3.55865e-158	0.478041	0.669	0.426	6.97816e-154	Th17 cells	CRIP1
COX6A1.1	5.14753e-55	0.47781	0.857	0.682	1.00938e-50	Th1 cells	COX6A1
HOPX.1	0	0.477663	0.211	0.032	0	Th17 cells	HOPX
TNFAIP3.3	1.65597e-170	0.477608	0.979	0.911	3.24719e-166	Th17 cells	TNFAIP3
NCKAP1L	8.16433e-111	0.477577	0.488	0.167	1.60094e-106	Th1 cells	NCKAP1L
DERL1	9.81462e-80	0.477557	0.56	0.244	1.92455e-75	Th1 cells	DERL1
FURIN.1	8.40016e-40	0.477513	0.337	0.165	1.64719e-35	Tr1 cells	FURIN
CCDC167	2.73879e-113	0.477344	0.399	0.119	5.3705e-109	Th1 cells	CCDC167
NINJ1.1	2.18811e-170	0.477143	0.441	0.224	4.29066e-166	Th17 cells	NINJ1
SYTL2	1.11275e-115	0.476988	0.272	0.063	2.18199e-111	Tr1 cells	SYTL2
APMAP	2.76834e-108	0.476932	0.426	0.136	5.42843e-104	Th1 cells	APMAP
DBI.2	1.86576e-68	0.476825	0.638	0.49	3.65856e-64	Tf regulatory cells	DBI
PDIA6.4	2.42244e-35	0.476484	0.489	0.299	4.75017e-31	Tr1 cells	PDIA6
EHD1.2	2.64143e-55	0.476004	0.357	0.154	5.17958e-51	Tr1 cells	EHD1
HNRNPUL1.3	2.53116e-32	0.475668	0.683	0.524	4.96336e-28	Tr1 cells	HNRNPUL1
CDC42SE2.1	5.36387e-42	0.475665	0.853	0.736	1.0518e-37	Tr1 cells	CDC42SE2
LBR	3.32811e-78	0.475567	0.579	0.259	6.52609e-74	Th1 cells	LBR
UAP1.1	1.08895e-36	0.474903	0.347	0.176	2.13532e-32	Tr1 cells	UAP1
UQCR11.2	4.83699e-34	0.474903	0.751	0.639	9.48486e-30	Tr1 cells	UQCR11
GBP4.1	3.59203e-52	0.474831	0.416	0.195	7.04361e-48	Tr1 cells	GBP4
CDC25B.1	2.17775e-95	0.474822	0.43	0.147	4.27035e-91	Th1 cells	CDC25B
IL16.1	1.46067e-77	0.474566	0.545	0.238	2.86423e-73	Th1 cells	IL16
FAM49B.2	8.7445e-42	0.474401	0.584	0.378	1.71471e-37	Tr1 cells	FAM49B
JAK1.1	6.61338e-58	0.47416	0.896	0.738	1.29682e-53	Th1 cells	JAK1
STK10.2	1.98666e-45	0.47402	0.476	0.263	3.89564e-41	Tr1 cells	STK10
BACH1.1	3.39246e-107	0.473827	0.449	0.148	6.65228e-103	Th1 cells	BACH1
CRTAM	0	0.473622	0.218	0.008	0	Th1 cells	CRTAM
REL.5	1.2791e-27	0.473592	0.749	0.604	2.50818e-23	Tr1 cells	REL
PCNT	1.72445e-166	0.473185	0.322	0.065	3.38148e-162	Th1 cells	PCNT
TNFAIP3.2	1.53495e-242	0.472998	0.975	0.908	3.00989e-238	Th2 cells	TNFAIP3
BCAP31	7.98831e-42	0.472623	0.504	0.295	1.56643e-37	Tr1 cells	BCAP31
RIOK3.1	2.44771e-36	0.472434	0.493	0.303	4.79971e-32	Tr1 cells	RIOK3
STING1.1	7.56274e-25	0.472414	0.296	0.168	1.48298e-20	Tr1 cells	STING1
DNAJB9.1	2.21224e-221	0.472396	0.613	0.401	4.33798e-217	Th2 cells	DNAJB9
CNOT6L	1.50957e-37	0.472143	0.909	0.778	2.96012e-33	Th1 cells	CNOT6L
MYL6.4	0	0.471951	0.973	0.876	0	Th2 cells	MYL6
ITGA4.2	4.57799e-58	0.471746	0.638	0.34	8.97697e-54	Th1 cells	ITGA4
NT5C3A	1.74734e-61	0.47171	0.552	0.266	3.42635e-57	Th1 cells	NT5C3A
HDDC2	2.04074e-102	0.471703	0.448	0.154	4.00169e-98	Th1 cells	HDDC2
SSNA1	3.56615e-78	0.471652	0.614	0.281	6.99287e-74	Th1 cells	SSNA1
CTSS.2	2.45931e-40	0.471594	0.544	0.337	4.82246e-36	Tr1 cells	CTSS
CHST12	4.86523e-165	0.471573	0.335	0.07	9.54022e-161	Th1 cells	CHST12
IL2RB.1	1.77789e-100	0.47154	0.322	0.139	3.48626e-96	Tf regulatory cells	IL2RB
ANKRD11.2	9.31794e-27	0.471352	0.656	0.507	1.82715e-22	Tr1 cells	ANKRD11
PSMA7.2	3.06657e-47	0.471059	0.864	0.694	6.01323e-43	Th1 cells	PSMA7
CAST.3	5.3019e-168	0.471042	0.744	0.499	1.03965e-163	Th17 cells	CAST
TAX1BP1.2	4.58822e-34	0.471035	0.712	0.542	8.99703e-30	Tr1 cells	TAX1BP1
CKLF.1	7.33059e-98	0.470849	0.445	0.155	1.43746e-93	Th1 cells	CKLF
S1PR4.4	2.22378e-45	0.470509	0.517	0.387	4.36062e-41	Tf regulatory cells	S1PR4
ACTG1.1	2.78048e-38	0.4705	0.966	0.957	5.45224e-34	Tf regulatory cells	ACTG1
BTG3.1	3.59001e-54	0.470195	0.387	0.235	7.03964e-50	Tf regulatory cells	BTG3
RORA.2	6.15735e-228	0.470039	0.72	0.504	1.20739e-223	Th2 cells	RORA
PTPRC	2.5178e-90	0.469989	0.966	0.938	4.93716e-86	Tf regulatory cells	PTPRC
C16orf87	1.26584e-48	0.469516	0.335	0.149	2.48219e-44	Tr1 cells	C16orf87
OCIAD2.1	1.06796e-44	0.469289	0.823	0.604	2.09416e-40	Th1 cells	OCIAD2
NOP10.1	4.52729e-36	0.469234	0.559	0.373	8.87757e-32	Tr1 cells	NOP10
CD53	3.25274e-55	0.469196	0.654	0.529	6.37829e-51	Tf regulatory cells	CD53
PARP1.2	4.63695e-42	0.469072	0.435	0.232	9.0926e-38	Tr1 cells	PARP1
GABARAPL2.1	2.21231e-60	0.469039	0.657	0.359	4.33813e-56	Th1 cells	GABARAPL2
COX5A.3	1.65405e-58	0.468774	0.553	0.401	3.24343e-54	Tf regulatory cells	COX5A
WAS	8.26587e-91	0.468757	0.53	0.212	1.62086e-86	Th1 cells	WAS
MT1X	1.17976e-97	0.468629	0.429	0.146	2.31339e-93	Th1 cells	MT1X
GLRX.1	1.79291e-64	0.468458	0.431	0.182	3.51573e-60	Th1 cells	GLRX
FAM102B.1	6.39816e-75	0.46837	0.291	0.095	1.25461e-70	Tr1 cells	FAM102B
ACTN4.1	0	0.468263	0.318	0.092	0	Th2 cells	ACTN4
SPPL2A.1	8.30323e-83	0.468124	0.5	0.203	1.62818e-78	Th1 cells	SPPL2A
AES.2	9.81557e-10	0.468078	0.329	0.284	1.92473e-05	Tf regulatory cells	AES
AP2M1.2	1.94947e-44	0.467976	0.597	0.379	3.82271e-40	Tr1 cells	AP2M1
C12orf75.3	1.62595e-285	0.467555	0.395	0.144	3.18833e-281	Th17 cells	C12orf75
ORAI2.1	2.29891e-60	0.467382	0.355	0.146	4.50794e-56	Tr1 cells	ORAI2
CAPNS1.2	1.05916e-70	0.467344	0.595	0.283	2.07691e-66	Th1 cells	CAPNS1
TMEM59.2	1.65715e-36	0.467329	0.721	0.566	3.2495e-32	Tr1 cells	TMEM59
DNAJC3.1	1.4355e-42	0.467284	0.457	0.25	2.81487e-38	Tr1 cells	DNAJC3
BZW1	9.08482e-49	0.467198	0.83	0.612	1.78144e-44	Th1 cells	BZW1
CISD2.1	5.72601e-50	0.466719	0.419	0.204	1.12281e-45	Tr1 cells	CISD2
BST2	1.99004e-80	0.466687	0.492	0.198	3.90226e-76	Th1 cells	BST2
SSR4.1	1.84816e-286	0.466375	0.906	0.787	3.62405e-282	Th2 cells	SSR4
TXNIP	3.36053e-141	0.466075	0.745	0.685	6.58967e-137	Naive CD4 T cells	TXNIP
APOL6.1	1.78673e-62	0.465776	0.582	0.286	3.5036e-58	Th1 cells	APOL6
IL10	0	0.465552	0.155	0.005	0	Th1 cells	IL10
CREM.3	7.43646e-217	0.465488	0.924	0.823	1.45822e-212	Th2 cells	CREM
ELMSAN1	6.1597e-43	0.465215	0.319	0.144	1.20786e-38	Tr1 cells	ELMSAN1
ARL6IP5.4	1.47386e-32	0.46511	0.784	0.662	2.89008e-28	Tr1 cells	ARL6IP5
VAMP8.2	1.35457e-37	0.464927	0.573	0.38	2.65618e-33	Tr1 cells	VAMP8
GHITM	9.62058e-56	0.464827	0.717	0.444	1.8865e-51	Th1 cells	GHITM
EIF3A.2	2.17134e-297	0.464453	0.726	0.525	4.25779e-293	Tfh cells	EIF3A
DUSP4.2	0	0.464435	0.253	0.074	0	Th2 cells	DUSP4
DOK2.2	2.03729e-41	0.463822	0.483	0.276	3.99492e-37	Tr1 cells	DOK2
MTPN	2.74088e-51	0.463688	0.703	0.434	5.3746e-47	Th1 cells	MTPN
GTF2I	7.57506e-82	0.463645	0.545	0.23	1.48539e-77	Th1 cells	GTF2I
CKAP2	6.69501e-92	0.463576	0.41	0.14	1.31282e-87	Th1 cells	CKAP2
GPR65	1.59682e-244	0.463562	0.343	0.127	3.1312e-240	Th17 cells	GPR65
NARF.1	1.51207e-45	0.463469	0.376	0.184	2.96502e-41	Tr1 cells	NARF
YWHAQ.2	3.87258e-232	0.463424	0.631	0.406	7.59374e-228	Th2 cells	YWHAQ
NSG1	0	0.463309	0.274	0.054	0	Th17 cells	NSG1
SEC61G.2	5.89736e-210	0.463162	0.735	0.562	1.15641e-205	Th2 cells	SEC61G
ORAI1.2	2.81571e-62	0.463113	0.586	0.283	5.52133e-58	Th1 cells	ORAI1
GNG2.2	3.21765e-27	0.463092	0.513	0.357	6.30949e-23	Tr1 cells	GNG2
PSMB4	1.17194e-54	0.46281	0.683	0.411	2.29805e-50	Th1 cells	PSMB4
NMI	1.33512e-115	0.462645	0.427	0.131	2.61804e-111	Th1 cells	NMI
TYMP	4.80695e-89	0.46227	0.268	0.11	9.42594e-85	Tf regulatory cells	TYMP
PGLS	1.73414e-61	0.462203	0.657	0.354	3.40047e-57	Th1 cells	PGLS
ATP5F1D	6.87765e-52	0.46214	0.855	0.671	1.34864e-47	Th1 cells	ATP5F1D
HLA-B.5	1.15759e-94	0.462081	1	0.997	2.26992e-90	Th1 cells	HLA-B
ZBP1.1	5.45626e-142	0.461977	0.244	0.045	1.06992e-137	Tr1 cells	ZBP1
HLA-A.3	0	0.461967	0.999	0.993	0	Th2 cells	HLA-A
CKAP2.1	2.30483e-51	0.461902	0.333	0.141	4.51955e-47	Tr1 cells	CKAP2
MYL12A.2	1.53634e-188	0.461666	0.958	0.826	3.0126e-184	Th17 cells	MYL12A
ARHGAP15	2.25352e-218	0.461243	0.638	0.436	4.41893e-214	Th2 cells	ARHGAP15
NT5C	1.54442e-100	0.461012	0.469	0.165	3.02845e-96	Th1 cells	NT5C
RNASET2.1	0	0.460837	0.907	0.784	0	Tfh cells	RNASET2
ITPA	1.8253e-95	0.460713	0.518	0.198	3.57923e-91	Th1 cells	ITPA
NR4A3.1	2.28776e-77	0.460522	0.408	0.153	4.48607e-73	Th1 cells	NR4A3
PSMB7	6.41319e-65	0.460085	0.634	0.326	1.25756e-60	Th1 cells	PSMB7
CORO1B.3	3.83463e-33	0.459852	0.449	0.334	7.51932e-29	Tf regulatory cells	CORO1B
RAB8B.3	1.68944e-33	0.459759	0.391	0.217	3.31282e-29	Tr1 cells	RAB8B
GTF3A	3.33299e-42	0.459662	0.829	0.612	6.53567e-38	Th1 cells	GTF3A
PMF1.1	1.33771e-39	0.459557	0.472	0.281	2.62311e-35	Tr1 cells	PMF1
DUSP16.1	8.66028e-40	0.459367	0.355	0.177	1.69819e-35	Tr1 cells	DUSP16
PSMA7.3	1.01364e-31	0.458887	0.8	0.695	1.98764e-27	Tr1 cells	PSMA7
KDM7A.1	3.86052e-44	0.458299	0.415	0.213	7.57009e-40	Tr1 cells	KDM7A
PTPRC.1	6.01434e-60	0.458076	0.971	0.939	1.17935e-55	Th1 cells	PTPRC
HIGD2A	1.47283e-44	0.457998	0.844	0.653	2.88807e-40	Th1 cells	HIGD2A
TPI1.5	1.72991e-34	0.457931	0.595	0.404	3.39219e-30	Tr1 cells	TPI1
STAT4.4	5.4151e-33	0.457695	0.485	0.299	1.06185e-28	Tr1 cells	STAT4
TPP1	9.73352e-133	0.457508	0.342	0.085	1.90865e-128	Th1 cells	TPP1
FERMT3	3.9983e-103	0.457223	0.447	0.151	7.84026e-99	Th1 cells	FERMT3
KLF6.3	2.94848e-164	0.457129	0.958	0.839	5.78168e-160	Th17 cells	KLF6
UFC1	1.1668e-50	0.456947	0.8	0.573	2.28797e-46	Th1 cells	UFC1
CBX3	5.48152e-49	0.456563	0.679	0.411	1.07487e-44	Th1 cells	CBX3
CCR4.2	0	0.456333	0.288	0.077	0	Th2 cells	CCR4
BLOC1S1.2	5.92359e-37	0.45574	0.493	0.303	1.16156e-32	Tr1 cells	BLOC1S1
SASH3	3.60234e-160	0.45549	0.343	0.074	7.06382e-156	Th1 cells	SASH3
PPP4C.2	1.45749e-45	0.455466	0.483	0.266	2.85799e-41	Tr1 cells	PPP4C
PSMB8	8.73197e-52	0.455343	0.596	0.47	1.71225e-47	Tf regulatory cells	PSMB8
ATRX	1.03327e-40	0.455082	0.706	0.457	2.02615e-36	Th1 cells	ATRX
STAT1.2	1.04438e-33	0.455069	0.564	0.344	2.04792e-29	Th1 cells	STAT1
TMX4.2	2.0813e-54	0.45499	0.401	0.25	4.08121e-50	Tf regulatory cells	TMX4
UBE2L6.1	2.15078e-45	0.454946	0.416	0.211	4.21746e-41	Tr1 cells	UBE2L6
CAP1.1	2.74196e-49	0.454912	0.506	0.37	5.3767e-45	Tf regulatory cells	CAP1
NR4A2.4	4.51945e-31	0.454894	0.842	0.661	8.86218e-27	Th1 cells	NR4A2
DYNC1H1.1	1.02537e-32	0.454728	0.492	0.309	2.01065e-28	Tr1 cells	DYNC1H1
KDM5B.1	6.32008e-42	0.4545	0.333	0.154	1.2393e-37	Tr1 cells	KDM5B
LY6E.3	2.58906e-180	0.454285	0.694	0.507	5.07689e-176	Th2 cells	LY6E
RTF2	2.15459e-72	0.454226	0.553	0.249	4.22494e-68	Th1 cells	RTF2
ANKRD28	0	0.454038	0.296	0.108	0	Th2 cells	ANKRD28
BANF1	5.4445e-71	0.453954	0.545	0.244	1.06761e-66	Th1 cells	BANF1
JPT1.3	2.25024e-60	0.453844	0.44	0.277	4.4125e-56	Tf regulatory cells	JPT1
PPP1R14B.2	3.08217e-178	0.453705	0.527	0.283	6.04382e-174	Th17 cells	PPP1R14B
JUND.3	1.31731e-62	0.45349	0.996	0.989	2.58312e-58	Tr1 cells	JUND
SDF4.3	4.86171e-41	0.453433	0.492	0.283	9.53333e-37	Tr1 cells	SDF4
ID3.1	8.40688e-35	0.453279	0.201	0.108	1.64851e-30	Tf regulatory cells	ID3
SELL.1	1.79084e-35	0.45318	0.764	0.61	3.51166e-31	T regulatory cells	SELL
E2F3	3.1413e-191	0.453026	0.325	0.059	6.15978e-187	Th1 cells	E2F3
GRK2.1	1.31481e-36	0.452801	0.525	0.326	2.57821e-32	Tr1 cells	GRK2
ATP6V0B.1	1.20955e-70	0.45278	0.592	0.277	2.3718e-66	Th1 cells	ATP6V0B
TCF25.1	1.55637e-46	0.452736	0.749	0.472	3.05188e-42	Th1 cells	TCF25
HMGB2.2	4.22466e-40	0.452733	0.806	0.578	8.28413e-36	Th1 cells	HMGB2
GNB2.1	8.26852e-73	0.452311	0.59	0.275	1.62137e-68	Th1 cells	GNB2
SAT1.5	4.38356e-50	0.4521	0.879	0.671	8.59572e-46	Th1 cells	SAT1
NDUFA6	7.47092e-30	0.451744	0.556	0.39	1.46497e-25	Tr1 cells	NDUFA6
RTN4	1.14751e-30	0.451591	0.694	0.478	2.25016e-26	Th1 cells	RTN4
IFI6.1	3.85166e-42	0.451574	0.499	0.264	7.55273e-38	Th1 cells	IFI6
GTF3C6.2	4.76465e-38	0.451519	0.501	0.303	9.343e-34	Tr1 cells	GTF3C6
TBX21	8.28459e-234	0.451424	0.211	0.022	1.62452e-229	Tr1 cells	TBX21
BCL3.1	6.97362e-38	0.451412	0.457	0.26	1.36746e-33	Tr1 cells	BCL3
ANKRD28.1	1.67765e-243	0.451398	0.323	0.116	3.28969e-239	Th17 cells	ANKRD28
CXCR5	0	0.451347	0.216	0.028	0	Tfh cells	CXCR5
DNAJC8	1.04737e-50	0.451188	0.694	0.408	2.05379e-46	Th1 cells	DNAJC8
GTF2H5	4.37204e-88	0.451182	0.482	0.182	8.57314e-84	Th1 cells	GTF2H5
HLA-B.2	0	0.451092	1	0.996	0	Th2 cells	HLA-B
PLP2.4	4.2382e-50	0.450991	0.582	0.429	8.31069e-46	Tf regulatory cells	PLP2
NDUFB1	4.50768e-53	0.450952	0.617	0.339	8.83911e-49	Th1 cells	NDUFB1
NAA50	2.39134e-83	0.45095	0.43	0.161	4.68919e-79	Th1 cells	NAA50
TNFSF13B	0	0.450924	0.244	0.034	0	Th17 cells	TNFSF13B
B2M.2	0	0.450764	1	1	0	Th2 cells	B2M
RNPEPL1.2	1.33294e-33	0.450727	0.5	0.315	2.61375e-29	Tr1 cells	RNPEPL1
TMSB10.2	5.95911e-96	0.450582	0.999	0.999	1.16852e-91	Tf regulatory cells	TMSB10
DSTN.1	2.84523e-227	0.45052	0.561	0.346	5.5792e-223	Th2 cells	DSTN
PFKFB3	1.28255e-33	0.450408	0.424	0.245	2.51495e-29	Tr1 cells	PFKFB3
ATP2B4	3.36679e-80	0.450204	0.265	0.113	6.60195e-76	Tf regulatory cells	ATP2B4
RIOK3	1.80207e-53	0.449967	0.569	0.301	3.53369e-49	Th1 cells	RIOK3
SH3KBP1.2	4.39825e-34	0.449815	0.556	0.371	8.62452e-30	Tr1 cells	SH3KBP1
VDAC1	8.29077e-52	0.449762	0.717	0.441	1.62574e-47	Th1 cells	VDAC1
ATP5ME	4.22883e-46	0.449235	0.765	0.498	8.29231e-42	Th1 cells	ATP5ME
FRMD4B.2	5.37067e-71	0.449085	0.22	0.09	1.05313e-66	Tf regulatory cells	FRMD4B
ANXA11.2	1.11081e-33	0.449037	0.62	0.442	2.17819e-29	Tr1 cells	ANXA11
RNF125	3.89122e-39	0.44895	0.909	0.752	7.63029e-35	Th1 cells	RNF125
PSMB6.1	2.05931e-33	0.448707	0.571	0.391	4.03811e-29	Tr1 cells	PSMB6
TUBA1C.1	1.3278e-291	0.448295	0.343	0.146	2.60369e-287	Th2 cells	TUBA1C
AQP3.3	2.85718e-240	0.448135	0.548	0.351	5.60265e-236	Tfh cells	AQP3
PDE4D	7.48604e-135	0.448125	0.654	0.433	1.46794e-130	Th17 cells	PDE4D
USF2.1	6.27491e-34	0.447845	0.539	0.351	1.23045e-29	Tr1 cells	USF2
BCL9L	7.70091e-52	0.447713	0.6	0.317	1.51007e-47	Th1 cells	BCL9L
SKI	2.22417e-31	0.447465	0.432	0.263	4.36137e-27	Tr1 cells	SKI
PPP1R12A	8.88598e-50	0.447391	0.487	0.34	1.74245e-45	Tf regulatory cells	PPP1R12A
PARK7	1.17427e-62	0.447389	0.697	0.559	2.30263e-58	Tf regulatory cells	PARK7
SELENOK.1	8.95917e-249	0.446829	0.916	0.792	1.7568e-244	Th2 cells	SELENOK
ACTR2	3.73427e-51	0.446819	0.672	0.578	7.32253e-47	Tf regulatory cells	ACTR2
ROCK1.1	3.89354e-49	0.446657	0.706	0.427	7.63485e-45	Th1 cells	ROCK1
CORO7.3	1.35889e-42	0.446463	0.461	0.251	2.66464e-38	Tr1 cells	CORO7
CACYBP.1	2.66779e-42	0.446459	0.651	0.403	5.23128e-38	Th1 cells	CACYBP
PCLAF	0	0.446221	0.239	0.007	0	Th1 cells	PCLAF
PSMD4.1	1.18586e-62	0.446024	0.57	0.285	2.32536e-58	Th1 cells	PSMD4
AIF1.1	2.44194e-275	0.445836	0.399	0.224	4.78839e-271	Activated CD4 T cells	AIF1
AHNAK.7	7.8649e-48	0.445391	0.708	0.42	1.54223e-43	Th1 cells	AHNAK
DCTN3.1	1.38545e-55	0.445362	0.664	0.382	2.71673e-51	Th1 cells	DCTN3
FMNL1.5	6.64357e-52	0.445187	0.477	0.325	1.30274e-47	Tf regulatory cells	FMNL1
TAPBP.1	1.48273e-43	0.445166	0.816	0.582	2.90749e-39	Th1 cells	TAPBP
CERK	1.03849e-229	0.445017	0.409	0.172	2.03638e-225	Th17 cells	CERK
MAP2K3	2.06224e-107	0.444852	0.387	0.118	4.04385e-103	Th1 cells	MAP2K3
MYH9.3	7.47413e-40	0.444574	0.581	0.474	1.4656e-35	Tf regulatory cells	MYH9
ELMO1	1.78827e-83	0.444507	0.477	0.184	3.50661e-79	Th1 cells	ELMO1
ETF1.1	4.39034e-35	0.444435	0.509	0.323	8.60902e-31	Tr1 cells	ETF1
YWHAB.3	6.04847e-243	0.444225	0.903	0.763	1.18604e-238	Th2 cells	YWHAB
YWHAZ.4	1.71443e-43	0.444168	0.932	0.87	3.36182e-39	Tr1 cells	YWHAZ
CTSD.1	2.03119e-46	0.44384	0.436	0.223	3.98296e-42	Tr1 cells	CTSD
ACTG1.3	5.87632e-35	0.443818	0.975	0.957	1.15229e-30	Tr1 cells	ACTG1
BICDL1.3	3.19743e-32	0.443693	0.575	0.389	6.26984e-28	Tr1 cells	BICDL1
SLC25A3	1.76613e-49	0.443464	0.909	0.813	3.4632e-45	Th1 cells	SLC25A3
PCBP2	7.98664e-52	0.443248	0.912	0.761	1.5661e-47	Th1 cells	PCBP2
GSTP1	1.52906e-34	0.443221	0.649	0.421	2.99834e-30	Th1 cells	GSTP1
RPS27L	2.61044e-29	0.443183	0.518	0.421	5.11882e-25	Tf regulatory cells	RPS27L
HNRNPD	6.38297e-48	0.443109	0.791	0.555	1.25164e-43	Th1 cells	HNRNPD
TMX4.3	2.99455e-40	0.443003	0.457	0.252	5.87202e-36	Tr1 cells	TMX4
RALY.1	6.96487e-63	0.442887	0.638	0.329	1.36574e-58	Th1 cells	RALY
NOP58.2	8.29428e-28	0.442432	0.692	0.543	1.62643e-23	Tr1 cells	NOP58
NFATC1.1	7.60636e-38	0.442428	0.352	0.179	1.49153e-33	Tr1 cells	NFATC1
SEC61B.4	1.8682e-170	0.442408	0.849	0.649	3.66335e-166	Th17 cells	SEC61B
ARF5	1.54491e-60	0.44239	0.579	0.289	3.02942e-56	Th1 cells	ARF5
TAP1	1.04158e-54	0.442104	0.375	0.227	2.04244e-50	Tf regulatory cells	TAP1
SRSF2.2	1.79745e-39	0.442028	0.935	0.818	3.52463e-35	Th1 cells	SRSF2
ATP1B3.5	9.86955e-44	0.442	0.725	0.432	1.93532e-39	Th1 cells	ATP1B3
GMCL1	8.31824e-76	0.441579	0.436	0.17	1.63112e-71	Th1 cells	GMCL1
TXK.1	3.21532e-35	0.441529	0.415	0.254	6.30493e-31	T regulatory cells	TXK
CSNK2B	4.02975e-50	0.440704	0.649	0.381	7.90194e-46	Th1 cells	CSNK2B
POLR1D	4.92732e-43	0.440672	0.822	0.62	9.66199e-39	Th1 cells	POLR1D
TRABD	3.2561e-43	0.440538	0.639	0.376	6.38489e-39	Th1 cells	TRABD
CASP3	1.31546e-99	0.440398	0.453	0.153	2.57948e-95	Th1 cells	CASP3
PRDM2	8.85122e-44	0.440117	0.522	0.388	1.73563e-39	Tf regulatory cells	PRDM2
RCSD1	5.0044e-56	0.440023	0.39	0.234	9.81312e-52	Tf regulatory cells	RCSD1
HAUS3.2	1.11732e-29	0.439515	0.489	0.317	2.19094e-25	Tr1 cells	HAUS3
AC058791.1.3	7.731e-96	0.439367	0.284	0.147	1.51597e-91	Th17 cells	AC058791.1
BIN1	1.81246e-48	0.439247	0.688	0.422	3.55405e-44	Th1 cells	BIN1
NLRC5	1.04794e-81	0.439196	0.419	0.155	2.05491e-77	Th1 cells	NLRC5
APOL6	8.27184e-40	0.439137	0.417	0.287	1.62202e-35	Tf regulatory cells	APOL6
CSGALNACT2	1.36319e-55	0.439015	0.506	0.244	2.67307e-51	Th1 cells	CSGALNACT2
TRMT112	8.51112e-51	0.438976	0.809	0.545	1.66895e-46	Th1 cells	TRMT112
PPP1R12A.2	5.36873e-33	0.438749	0.536	0.341	1.05275e-28	Tr1 cells	PPP1R12A
PARK7.2	3.80644e-31	0.43869	0.703	0.561	7.46404e-27	Tr1 cells	PARK7
JOSD1.1	2.93043e-28	0.438554	0.689	0.543	5.74628e-24	Tr1 cells	JOSD1
PHTF2.1	2.17051e-56	0.438493	0.32	0.127	4.25616e-52	Tr1 cells	PHTF2
TPM4.3	5.58362e-33	0.438445	0.453	0.337	1.09489e-28	Tf regulatory cells	TPM4
RNF213	1.15682e-28	0.438303	0.572	0.502	2.2684e-24	Tf regulatory cells	RNF213
SELL	0	0.438067	0.733	0.556	0	Naive CD4 T cells	SELL
STAT4.3	1.86471e-43	0.437777	0.544	0.298	3.65651e-39	Th1 cells	STAT4
CASP8.1	6.12097e-47	0.437768	0.66	0.386	1.20026e-42	Th1 cells	CASP8
DR1.2	4.44381e-40	0.437724	0.439	0.242	8.71386e-36	Tr1 cells	DR1
ATP5MD	1.13701e-38	0.437632	0.755	0.547	2.22957e-34	Th1 cells	ATP5MD
CFLAR.1	1.22617e-44	0.437602	0.515	0.376	2.4044e-40	Tf regulatory cells	CFLAR
SGMS1	8.34404e-102	0.437598	0.206	0.067	1.63618e-97	Tf regulatory cells	SGMS1
TGFBR3.1	0	0.437327	0.279	0.086	0	Th2 cells	TGFBR3
SNX6	8.46165e-32	0.43728	0.589	0.406	1.65924e-27	Tr1 cells	SNX6
UQCR11.1	1.42068e-48	0.437136	0.847	0.638	2.7858e-44	Th1 cells	UQCR11
DDX24	2.53175e-37	0.436998	0.917	0.828	4.9645e-33	Tr1 cells	DDX24
SFT2D1.2	1.43387e-46	0.436972	0.376	0.178	2.81168e-42	Tr1 cells	SFT2D1
CAPNS1.3	3.98596e-38	0.436868	0.483	0.285	7.81607e-34	Tr1 cells	CAPNS1
CTSS.1	3.08891e-59	0.436821	0.635	0.335	6.05704e-55	Th1 cells	CTSS
USP11	4.08304e-103	0.436647	0.366	0.11	8.00643e-99	Th1 cells	USP11
SDCBP.1	8.97956e-38	0.436603	0.853	0.642	1.7608e-33	Th1 cells	SDCBP
SIRPG	6.58071e-112	0.436445	0.338	0.091	1.29041e-107	Th1 cells	SIRPG
SEMA4D.1	2.00347e-38	0.436249	0.608	0.358	3.9286e-34	Th1 cells	SEMA4D
BOD1L1	1.48815e-42	0.436129	0.749	0.5	2.9181e-38	Th1 cells	BOD1L1
CD44.2	5.99831e-45	0.435979	0.957	0.861	1.17621e-40	Th1 cells	CD44
HBS1L	6.49309e-65	0.435848	0.496	0.22	1.27323e-60	Th1 cells	HBS1L
LPXN.1	2.06955e-41	0.435462	0.372	0.187	4.05818e-37	Tr1 cells	LPXN
JPT1.2	2.93188e-243	0.435364	0.474	0.258	5.74912e-239	Th2 cells	JPT1
SPCS2.2	6.96395e-31	0.434925	0.637	0.475	1.36556e-26	Tr1 cells	SPCS2
DBF4	4.47799e-35	0.43484	0.511	0.313	8.78088e-31	Tr1 cells	DBF4
P2RY8.1	1.04115e-46	0.434832	0.665	0.394	2.04159e-42	Th1 cells	P2RY8
ZBTB32	0	0.43481	0.219	0.009	0	Th1 cells	ZBTB32
NR4A2.2	2.96064e-225	0.43479	0.794	0.636	5.80553e-221	Tfh cells	NR4A2
CSRNP1.2	8.64812e-28	0.43447	0.572	0.408	1.69581e-23	Tr1 cells	CSRNP1
SP100.1	8.86353e-46	0.434419	0.699	0.432	1.73805e-41	Th1 cells	SP100
LEF1.1	7.28283e-32	0.434417	0.662	0.52	1.42809e-27	T regulatory cells	LEF1
H1-10.1	1.84991e-07	0.433973	0.401	0.337	0.0036275	Tr1 cells	H1-10
SHMT2.1	1.85887e-125	0.433462	0.241	0.077	3.64505e-121	Tf regulatory cells	SHMT2
RAB5IF	3.37579e-62	0.43343	0.526	0.246	6.61959e-58	Th1 cells	RAB5IF
EMB.3	3.60105e-32	0.433051	0.534	0.441	7.0613e-28	Tf regulatory cells	EMB
TBCA	2.39075e-44	0.432896	0.757	0.53	4.68801e-40	Th1 cells	TBCA
CLTB.1	8.54125e-63	0.432876	0.564	0.27	1.67485e-58	Th1 cells	CLTB
ID3.3	2.40553e-07	0.43279	0.168	0.11	0.004717	Tr1 cells	ID3
MAP3K2	1.96527e-32	0.432594	0.661	0.429	3.85369e-28	Th1 cells	MAP3K2
EPSTI1	3.55543e-53	0.43256	0.336	0.192	6.97185e-49	Tf regulatory cells	EPSTI1
CAST.2	4.45186e-194	0.432294	0.693	0.493	8.72965e-190	Th2 cells	CAST
SH3BGRL	1.46307e-52	0.432198	0.611	0.485	2.86894e-48	Tf regulatory cells	SH3BGRL
CD3G.1	9.23381e-41	0.432102	0.881	0.772	1.81066e-36	Th1 cells	CD3G
DTHD1.1	0	0.4321	0.179	0.009	0	Tr1 cells	DTHD1
PSMC5.1	2.42053e-52	0.432001	0.657	0.373	4.74642e-48	Th1 cells	PSMC5
TAGLN2.6	1.37728e-68	0.431643	0.89	0.802	2.70072e-64	Tf regulatory cells	TAGLN2
PPIB.6	2.91459e-36	0.431395	0.868	0.735	5.71522e-32	Tr1 cells	PPIB
ATXN1.2	1.21496e-55	0.431392	0.371	0.219	2.38241e-51	Tf regulatory cells	ATXN1
TRAF3	1.3884e-51	0.431319	0.345	0.152	2.72252e-47	Tr1 cells	TRAF3
HNRNPA3.1	3.61962e-38	0.431178	0.852	0.717	7.09771e-34	Tr1 cells	HNRNPA3
ATP6V0E1.2	4.93168e-52	0.431119	0.676	0.563	9.67052e-48	Tf regulatory cells	ATP6V0E1
CIB1.2	3.13615e-46	0.43106	0.89	0.694	6.14968e-42	Th1 cells	CIB1
NUDT1	8.09439e-89	0.430821	0.447	0.161	1.58723e-84	Th1 cells	NUDT1
UQCRFS1	2.94875e-47	0.430753	0.749	0.493	5.78221e-43	Th1 cells	UQCRFS1
LCP1.4	2.46447e-39	0.430512	0.584	0.469	4.83258e-35	Tf regulatory cells	LCP1
ATP5MC2	2.18738e-60	0.430426	0.962	0.917	4.28923e-56	Th1 cells	ATP5MC2
KLF13.1	2.05411e-31	0.43038	0.749	0.602	4.0279e-27	Tr1 cells	KLF13
CD27.2	1.25314e-40	0.429924	0.463	0.337	2.45728e-36	Tf regulatory cells	CD27
TMEM256	3.40319e-73	0.429767	0.558	0.249	6.67331e-69	Th1 cells	TMEM256
GADD45G.2	1.19156e-206	0.429756	0.289	0.129	2.33654e-202	Th2 cells	GADD45G
CD52.5	7.15577e-221	0.429675	0.99	0.923	1.40317e-216	Th17 cells	CD52
DOCK8	8.93554e-53	0.429598	0.613	0.33	1.75217e-48	Th1 cells	DOCK8
TUBA4A.2	7.34961e-205	0.429421	0.643	0.464	1.44118e-200	Tfh cells	TUBA4A
CHD4	3.81878e-67	0.429317	0.512	0.225	7.48824e-63	Th1 cells	CHD4
CHD1.1	2.60105e-27	0.429307	0.737	0.6	5.10041e-23	Tr1 cells	CHD1
RAB11FIP1.2	5.11716e-193	0.428875	0.369	0.194	1.00342e-188	Th2 cells	RAB11FIP1
MYO1F.3	1.32549e-95	0.428773	0.24	0.089	2.59916e-91	Tf regulatory cells	MYO1F
SPAG7	1.09662e-97	0.428573	0.503	0.182	2.15036e-93	Th1 cells	SPAG7
GALNT1	1.84763e-74	0.428492	0.448	0.176	3.62302e-70	Th1 cells	GALNT1
GAPDH.5	1.96718e-223	0.428344	0.968	0.869	3.85744e-219	Th17 cells	GAPDH
H2AFV.2	8.85556e-12	0.428254	0.271	0.186	1.73649e-07	Tr1 cells	H2AFV
HEBP2	1.28928e-44	0.428154	0.639	0.53	2.52815e-40	Tf regulatory cells	HEBP2
TNIP1.1	1.37163e-82	0.428099	0.501	0.198	2.68962e-78	Th1 cells	TNIP1
CDK13.1	2.55344e-43	0.428099	0.668	0.4	5.00705e-39	Th1 cells	CDK13
ZMAT2	1.46865e-56	0.428086	0.583	0.3	2.87987e-52	Th1 cells	ZMAT2
IRF1.4	2.93494e-37	0.428054	0.931	0.83	5.75512e-33	Tr1 cells	IRF1
MALAT1.1	3.40816e-07	0.427903	0.34	0.292	0.00668305	Tf regulatory cells	MALAT1
AC058791.1.4	1.95855e-19	0.427811	0.23	0.154	3.84053e-15	Tf regulatory cells	AC058791.1
UQCR10.2	6.60024e-30	0.427736	0.713	0.555	1.29424e-25	Tr1 cells	UQCR10
C4orf48.3	9.39192e-45	0.427605	0.388	0.192	1.84166e-40	Tr1 cells	C4orf48
AFF3	7.66346e-122	0.427411	0.275	0.062	1.50273e-117	Th1 cells	AFF3
PFN1.2	0	0.427244	0.973	0.904	0	Tfh cells	PFN1
FKBP8.1	1.58999e-35	0.427098	0.616	0.422	3.11782e-31	Tr1 cells	FKBP8
APMAP.1	2.43768e-60	0.427086	0.344	0.138	4.78004e-56	Tr1 cells	APMAP
TXNL4A	8.23307e-48	0.427065	0.677	0.397	1.61442e-43	Th1 cells	TXNL4A
RPLP0	0	0.427062	1	0.996	0	Th17 cells	RPLP0
ARRB2	2.21061e-65	0.427022	0.527	0.24	4.33479e-61	Th1 cells	ARRB2
PPIB.4	4.11253e-161	0.426836	0.9	0.725	8.06426e-157	Th17 cells	PPIB
IER2.1	1.02298e-121	0.426745	0.839	0.786	2.00596e-117	Activated CD4 T cells	IER2
LSP1.2	7.01056e-29	0.42653	0.7	0.535	1.3747e-24	Th1 cells	LSP1
SNF8	5.56927e-70	0.426372	0.573	0.265	1.09208e-65	Th1 cells	SNF8
SEC11A.2	9.95474e-28	0.426339	0.528	0.377	1.95202e-23	Tr1 cells	SEC11A
ZBTB38	8.60317e-56	0.426338	0.276	0.141	1.687e-51	Tf regulatory cells	ZBTB38
UBTF	5.22766e-54	0.426333	0.552	0.274	1.02509e-49	Th1 cells	UBTF
VCP.1	3.91185e-35	0.42627	0.497	0.302	7.67075e-31	Tr1 cells	VCP
CRIP2	1.1892e-271	0.426213	0.307	0.124	2.3319e-267	Th2 cells	CRIP2
NCKAP1L.1	4.42398e-46	0.426167	0.363	0.17	8.67498e-42	Tr1 cells	NCKAP1L
STK17B.1	1.65974e-33	0.426068	0.901	0.849	3.25459e-29	Tr1 cells	STK17B
ZNF207	1.88345e-40	0.425807	0.679	0.427	3.69325e-36	Th1 cells	ZNF207
TANK.1	2.16237e-47	0.425654	0.386	0.242	4.2402e-43	Tf regulatory cells	TANK
ATP6V1F.2	5.87376e-33	0.425294	0.539	0.35	1.15178e-28	Tr1 cells	ATP6V1F
STK26	1.07885e-89	0.424978	0.394	0.133	2.11552e-85	Th1 cells	STK26
TMF1.1	5.10356e-28	0.424949	0.581	0.416	1.00076e-23	Tr1 cells	TMF1
LAMTOR4	3.65751e-44	0.424907	0.773	0.532	7.17201e-40	Th1 cells	LAMTOR4
LBH.3	2.19552e-44	0.424798	0.669	0.403	4.30519e-40	Th1 cells	LBH
DUSP10.2	7.34797e-48	0.424536	0.3	0.124	1.44086e-43	Tr1 cells	DUSP10
REEP5.4	1.14518e-55	0.424473	0.425	0.269	2.24558e-51	Tf regulatory cells	REEP5
PIK3IP1	0	0.424471	0.88	0.797	0	Naive CD4 T cells	PIK3IP1
TMSB4X.3	0	0.42419	1	1	0	Tfh cells	TMSB4X
SEPTIN7.1	3.66813e-12	0.424066	0.548	0.501	7.19284e-08	Tr1 cells	SEPTIN7
DOCK2	2.11055e-69	0.423741	0.535	0.236	4.13858e-65	Th1 cells	DOCK2
CD63.2	1.57813e-204	0.423545	0.431	0.197	3.09455e-200	Th17 cells	CD63
FAM107B.3	1.9248e-153	0.42336	0.837	0.719	3.77433e-149	Th2 cells	FAM107B
RNF7	2.00359e-47	0.423176	0.735	0.474	3.92883e-43	Th1 cells	RNF7
GNAS	5.56143e-49	0.422907	0.969	0.954	1.09054e-44	Tr1 cells	GNAS
PSMD13.1	2.93179e-36	0.42264	0.449	0.262	5.74894e-32	Tr1 cells	PSMD13
CXCR4.2	3.02666e-123	0.422628	0.936	0.903	5.93497e-119	Th2 cells	CXCR4
PAXX.1	1.06095e-48	0.422434	0.586	0.316	2.08043e-44	Th1 cells	PAXX
SCAND1	1.58824e-46	0.422407	0.624	0.506	3.11439e-42	Tf regulatory cells	SCAND1
CDC42EP3.2	1.69519e-239	0.422389	0.328	0.118	3.3241e-235	Th17 cells	CDC42EP3
TADA3	2.36404e-99	0.422354	0.421	0.138	4.63565e-95	Th1 cells	TADA3
ARPC4	9.3671e-46	0.422257	0.509	0.378	1.83679e-41	Tf regulatory cells	ARPC4
RHBDD2.1	1.36755e-47	0.422149	0.416	0.273	2.68164e-43	Tf regulatory cells	RHBDD2
FNBP1.1	1.59475e-41	0.42214	0.65	0.556	3.12714e-37	Tf regulatory cells	FNBP1
TSC22D3.1	1.1483e-56	0.421998	0.972	0.955	2.2517e-52	Tf regulatory cells	TSC22D3
LEPROTL1.1	5.23307e-42	0.421968	0.971	0.927	1.02615e-37	Tr1 cells	LEPROTL1
HNRNPH3	1.03967e-26	0.421841	0.687	0.544	2.03868e-22	Tr1 cells	HNRNPH3
TMEM160.1	1.23582e-66	0.421817	0.578	0.274	2.42332e-62	Th1 cells	TMEM160
TGFB1.5	6.09409e-45	0.421814	0.669	0.55	1.19499e-40	Tf regulatory cells	TGFB1
NFKBIZ	5.93772e-137	0.421777	0.512	0.398	1.16433e-132	Activated CD4 T cells	NFKBIZ
ANXA6.2	1.11217e-56	0.421414	0.54	0.27	2.18085e-52	Th1 cells	ANXA6
XRCC5	1.16306e-44	0.421274	0.71	0.459	2.28064e-40	Th1 cells	XRCC5
AKIRIN2.1	1.71312e-32	0.421274	0.364	0.199	3.35925e-28	Tr1 cells	AKIRIN2
CARS	4.12135e-89	0.421212	0.165	0.033	8.08156e-85	Th1 cells	CARS
MAP3K2.1	7.2763e-20	0.421021	0.564	0.431	1.42681e-15	Tr1 cells	MAP3K2
ADAR.1	1.02888e-42	0.420948	0.658	0.392	2.01752e-38	Th1 cells	ADAR
SRGN.4	7.0289e-81	0.420899	0.978	0.956	1.3783e-76	Tf regulatory cells	SRGN
RAB8B.2	2.43498e-45	0.42072	0.351	0.215	4.77475e-41	Tf regulatory cells	RAB8B
TPGS1	4.23259e-78	0.420712	0.475	0.19	8.29968e-74	Th1 cells	TPGS1
IL21R	5.10504e-85	0.420062	0.41	0.146	1.00105e-80	Th1 cells	IL21R
PDIA6.2	1.12746e-233	0.420039	0.492	0.277	2.21084e-229	Th2 cells	PDIA6
NCOR1.1	2.74249e-42	0.420009	0.671	0.403	5.37776e-38	Th1 cells	NCOR1
ARRDC3	6.31719e-21	0.419959	0.362	0.245	1.23874e-16	T regulatory cells	ARRDC3
FOS.2	2.39134e-136	0.419938	0.908	0.793	4.68918e-132	Th2 cells	FOS
ACTB.2	0	0.419783	0.996	0.978	0	Tfh cells	ACTB
PIK3CG	3.24228e-169	0.419641	0.297	0.055	6.35778e-165	Th1 cells	PIK3CG
MYL12A.3	3.14954e-59	0.419619	0.896	0.833	6.17593e-55	Tf regulatory cells	MYL12A
TNFRSF18.2	5.03955e-96	0.419517	0.192	0.061	9.88205e-92	Tf regulatory cells	TNFRSF18
SKIL	3.06541e-34	0.419449	0.636	0.402	6.01096e-30	Th1 cells	SKIL
UQCRH	2.50149e-47	0.419335	0.9	0.778	4.90517e-43	Th1 cells	UQCRH
SRSF9.1	3.89388e-29	0.419252	0.649	0.498	7.63551e-25	Tr1 cells	SRSF9
KDM5B	3.76821e-66	0.419129	0.394	0.153	7.38907e-62	Th1 cells	KDM5B
TPM3.1	1.0527e-51	0.419084	0.795	0.722	2.06424e-47	Tf regulatory cells	TPM3
IVNS1ABP.1	1.93728e-41	0.418906	0.516	0.387	3.79881e-37	Tf regulatory cells	IVNS1ABP
ZEB1.2	4.44108e-33	0.418862	0.525	0.316	8.70852e-29	Th1 cells	ZEB1
GLUL	4.25266e-230	0.418862	0.236	0.09	8.33904e-226	Th2 cells	GLUL
TLN1.2	7.34953e-32	0.418706	0.484	0.301	1.44117e-27	Tr1 cells	TLN1
RNPEPL1	1.26822e-51	0.418651	0.466	0.313	2.48686e-47	Tf regulatory cells	RNPEPL1
MAZ	3.79818e-52	0.418403	0.675	0.373	7.44784e-48	Th1 cells	MAZ
ARL6IP5.2	8.75892e-42	0.418298	0.731	0.661	1.71754e-37	Tf regulatory cells	ARL6IP5
SPG7	9.31408e-70	0.418092	0.473	0.197	1.8264e-65	Th1 cells	SPG7
APBB1IP.1	8.66948e-50	0.417946	0.64	0.365	1.7e-45	Th1 cells	APBB1IP
DDI2.2	5.09131e-55	0.417936	0.26	0.093	9.98355e-51	Tr1 cells	DDI2
CFAP20.1	8.12423e-46	0.417764	0.514	0.265	1.59308e-41	Th1 cells	CFAP20
GADD45A	4.31483e-160	0.417637	0.535	0.406	8.46095e-156	Activated CD4 T cells	GADD45A
DDX17.2	6.30046e-33	0.417618	0.745	0.512	1.23546e-28	Th1 cells	DDX17
ZAP70	9.65582e-70	0.417597	0.525	0.231	1.89341e-65	Th1 cells	ZAP70
FCMR.5	3.7375e-25	0.417363	0.617	0.467	7.32886e-21	Tr1 cells	FCMR
YPEL5.5	8.95492e-40	0.417222	0.968	0.93	1.75597e-35	Tr1 cells	YPEL5
NDUFA2	7.27291e-43	0.417011	0.666	0.418	1.42615e-38	Th1 cells	NDUFA2
MIR4435-2HG.1	5.17687e-89	0.416885	0.128	0.02	1.01513e-84	Tr1 cells	MIR4435-2HG
SAMSN1.5	4.29051e-156	0.416871	0.757	0.511	8.41326e-152	Th17 cells	SAMSN1
PYCARD.1	4.91056e-49	0.416624	0.312	0.131	9.62911e-45	Tr1 cells	PYCARD
CALM2.1	3.64711e-38	0.416502	0.94	0.849	7.15161e-34	Tr1 cells	CALM2
DIAPH1.2	2.00503e-39	0.416499	0.461	0.258	3.93167e-35	Tr1 cells	DIAPH1
ITGB7	2.54071e-64	0.416342	0.343	0.185	4.98208e-60	Tf regulatory cells	ITGB7
CD82.1	8.47699e-55	0.416182	0.296	0.115	1.66225e-50	Tr1 cells	CD82
RAP1B	9.82272e-42	0.416153	0.886	0.73	1.92614e-37	Th1 cells	RAP1B
MYC	2.06522e-110	0.415633	0.306	0.208	4.04968e-106	Activated CD4 T cells	MYC
C16orf72	8.2312e-45	0.415605	0.583	0.326	1.61406e-40	Th1 cells	C16orf72
NAB1	0	0.415258	0.224	0.058	0	Tfh cells	NAB1
B4GALT1.3	4.94938e-50	0.415199	0.569	0.297	9.70524e-46	Th1 cells	B4GALT1
PACS1	3.02804e-57	0.415187	0.53	0.256	5.93768e-53	Th1 cells	PACS1
GATA3.4	4.68511e-156	0.414842	0.45	0.231	9.18704e-152	Th17 cells	GATA3
FAM160B1.1	4.88091e-71	0.414733	0.301	0.144	9.57098e-67	Tf regulatory cells	FAM160B1
UBE2S.2	1.66624e-30	0.414528	0.699	0.523	3.26734e-26	Tr1 cells	UBE2S
ARL4A.2	1.21238e-141	0.414408	0.705	0.465	2.37736e-137	Th17 cells	ARL4A
CASP3.1	1.27879e-46	0.414201	0.343	0.155	2.50758e-42	Tr1 cells	CASP3
NDUFA11	2.22732e-43	0.414057	0.748	0.508	4.36756e-39	Th1 cells	NDUFA11
HCLS1.2	2.67693e-30	0.413834	0.645	0.481	5.24919e-26	Tr1 cells	HCLS1
ACOT9.1	5.39895e-134	0.413762	0.336	0.08	1.05868e-129	Th1 cells	ACOT9
IFI27L2.1	8.43811e-77	0.413502	0.443	0.173	1.65463e-72	Th1 cells	IFI27L2
SIK3	2.68067e-70	0.413371	0.449	0.184	5.25653e-66	Th1 cells	SIK3
SMARCA5	6.71884e-27	0.413244	0.575	0.412	1.3175e-22	Tr1 cells	SMARCA5
TPM3.3	3.82747e-27	0.413172	0.807	0.723	7.50528e-23	Tr1 cells	TPM3
SH3KBP1	5.05591e-42	0.413169	0.5	0.37	9.91414e-38	Tf regulatory cells	SH3KBP1
UBE2D2.1	5.695e-33	0.413151	0.808	0.709	1.11673e-28	Tr1 cells	UBE2D2
ETHE1	4.06538e-70	0.413082	0.479	0.203	7.9718e-66	Th1 cells	ETHE1
PARP14.1	1.72447e-58	0.413033	0.419	0.182	3.38152e-54	Th1 cells	PARP14
GK	3.62458e-155	0.412938	0.204	0.03	7.10745e-151	Tr1 cells	GK
TRADD.5	4.98589e-147	0.412894	0.489	0.271	9.77683e-143	Th17 cells	TRADD
RASA2.3	4.74638e-54	0.412753	0.597	0.307	9.30718e-50	Th1 cells	RASA2
ARL4A.1	2.90131e-164	0.412703	0.647	0.46	5.68918e-160	Th2 cells	ARL4A
AC058791.1.5	2.61973e-10	0.412674	0.235	0.156	5.13703e-06	Tr1 cells	AC058791.1
DYNLL1.3	8.00142e-34	0.412606	0.717	0.495	1.569e-29	Th1 cells	DYNLL1
RAD23B	2.2232e-76	0.412587	0.504	0.208	4.35948e-72	Th1 cells	RAD23B
BRD4	5.43668e-42	0.412582	0.644	0.379	1.06608e-37	Th1 cells	BRD4
PRKCQ.1	3.04705e-40	0.412557	0.404	0.21	5.97496e-36	Tr1 cells	PRKCQ
GCHFR.1	8.05437e-84	0.412431	0.403	0.142	1.57938e-79	Th1 cells	GCHFR
UGP2.1	4.32833e-32	0.412182	0.425	0.313	8.48742e-28	Tf regulatory cells	UGP2
SMAD3	4.16678e-76	0.412151	0.279	0.086	8.17063e-72	Tr1 cells	SMAD3
DNAJC7	5.99789e-50	0.412123	0.638	0.359	1.17613e-45	Th1 cells	DNAJC7
EID1.1	2.81487e-53	0.412045	0.742	0.638	5.51968e-49	Tf regulatory cells	EID1
FHIT	0	0.411949	0.319	0.162	0	Naive CD4 T cells	FHIT
PSMB10	1.11056e-78	0.411927	0.421	0.157	2.17769e-74	Th1 cells	PSMB10
TGFBR2	3.39981e-274	0.411782	0.496	0.351	6.66669e-270	Naive CD4 T cells	TGFBR2
PIM1.1	7.19312e-113	0.411245	0.625	0.418	1.4105e-108	Th17 cells	PIM1
ANXA7.1	1.20995e-30	0.411226	0.544	0.361	2.37258e-26	Tr1 cells	ANXA7
SAMD9.1	7.08728e-37	0.411003	0.449	0.242	1.38974e-32	Th1 cells	SAMD9
RNPEPL1.1	1.1873e-55	0.410995	0.606	0.313	2.32818e-51	Th1 cells	RNPEPL1
BACH1.2	5.34458e-38	0.41084	0.317	0.15	1.04802e-33	Tr1 cells	BACH1
DOK2.1	5.2154e-55	0.410511	0.552	0.274	1.02269e-50	Th1 cells	DOK2
FKBP8	7.46425e-42	0.410479	0.678	0.421	1.46366e-37	Th1 cells	FKBP8
HLA-DPA1.2	2.06011e-252	0.410421	0.348	0.156	4.03967e-248	Th2 cells	HLA-DPA1
IDS.2	2.42618e-257	0.41032	0.773	0.578	4.7575e-253	Tfh cells	IDS
TPI1.1	4.94064e-206	0.410224	0.598	0.382	9.6881e-202	Th2 cells	TPI1
SYNGR2	2.85444e-54	0.410209	0.344	0.143	5.59726e-50	Tr1 cells	SYNGR2
TXK	0	0.410111	0.367	0.204	0	Naive CD4 T cells	TXK
HNRNPA2B1.1	6.36227e-43	0.409914	0.975	0.889	1.24758e-38	Th1 cells	HNRNPA2B1
ACIN1	1.56396e-63	0.409881	0.505	0.223	3.06677e-59	Th1 cells	ACIN1
PRR13	1.36993e-40	0.409836	0.565	0.445	2.6863e-36	Tf regulatory cells	PRR13
C1orf56	1.96919e-14	0.409786	0.425	0.305	3.86138e-10	Tr1 cells	C1orf56
MYO5A	6.40458e-81	0.409654	0.235	0.063	1.25587e-76	Tr1 cells	MYO5A
DR1.1	1.16466e-60	0.409598	0.521	0.241	2.28377e-56	Th1 cells	DR1
PLEKHO1.2	1.02476e-54	0.409586	0.456	0.206	2.00944e-50	Th1 cells	PLEKHO1
CTSB	1.26069e-51	0.408917	0.335	0.141	2.4721e-47	Tr1 cells	CTSB
ABI1.1	5.64253e-59	0.408806	0.539	0.254	1.10644e-54	Th1 cells	ABI1
SRSF7.1	8.77877e-224	0.40873	0.962	0.906	1.72143e-219	Th2 cells	SRSF7
HLA-C.5	6.35278e-69	0.408724	1	0.994	1.24572e-64	Th1 cells	HLA-C
TACC3.1	2.45625e-31	0.408433	0.38	0.211	4.81647e-27	Tr1 cells	TACC3
TMEM258	3.43707e-41	0.408305	0.8	0.571	6.73976e-37	Th1 cells	TMEM258
RBPJ	3.34723e-20	0.408056	0.357	0.275	6.56358e-16	Tf regulatory cells	RBPJ
CLK1.1	1.79394e-20	0.407773	0.649	0.526	3.51773e-16	Tr1 cells	CLK1
ID2.3	1.20638e-125	0.407359	0.657	0.486	2.36559e-121	Th2 cells	ID2
EMP3.6	4.00446e-30	0.407085	0.832	0.689	7.85234e-26	Tr1 cells	EMP3
CD3E.1	2.06584e-39	0.40694	0.921	0.877	4.0509e-35	Tr1 cells	CD3E
DYNC1H1	4.26658e-49	0.40689	0.575	0.308	8.36634e-45	Th1 cells	DYNC1H1
PDXK	1.79322e-94	0.406831	0.422	0.142	3.51632e-90	Th1 cells	PDXK
WIPF1.1	6.93014e-38	0.406709	0.524	0.407	1.35893e-33	Tf regulatory cells	WIPF1
SQSTM1.2	2.04822e-109	0.406382	0.633	0.434	4.01635e-105	Th17 cells	SQSTM1
NR3C1.3	1.1077e-180	0.406344	0.631	0.468	2.1721e-176	Tfh cells	NR3C1
OGDH.2	9.1804e-60	0.406269	0.291	0.106	1.80018e-55	Tr1 cells	OGDH
TRAPPC10	1.80573e-65	0.406135	0.543	0.248	3.54086e-61	Th1 cells	TRAPPC10
TULP4.2	3.21976e-34	0.405905	0.316	0.155	6.31364e-30	Tr1 cells	TULP4
AES.1	2.62284e-53	0.405898	0.406	0.276	5.14312e-49	Th17 cells	AES
NCF4	1.26877e-206	0.405789	0.197	0.037	2.48793e-202	Tf regulatory cells	NCF4
FYN.2	3.53961e-268	0.405611	0.784	0.609	6.94081e-264	Tfh cells	FYN
ELF1.2	6.88318e-26	0.405611	0.841	0.756	1.34972e-21	Tr1 cells	ELF1
RASSF5.1	2.20762e-34	0.405606	0.503	0.302	4.32893e-30	Tr1 cells	RASSF5
PAG1	2.96267e-26	0.405508	0.489	0.394	5.8095e-22	Tf regulatory cells	PAG1
SELENOS	1.54923e-193	0.405407	0.527	0.326	3.03788e-189	Th2 cells	SELENOS
RARA.2	6.80354e-47	0.405324	0.347	0.156	1.33411e-42	Tr1 cells	RARA
COPZ1	8.79845e-91	0.405214	0.46	0.166	1.72529e-86	Th1 cells	COPZ1
COPE.3	1.63626e-49	0.405149	0.611	0.474	3.20855e-45	Tf regulatory cells	COPE
SLC9A3R1.1	9.69583e-46	0.405027	0.344	0.155	1.90126e-41	Tr1 cells	SLC9A3R1
UBL3	2.42712e-44	0.404869	0.397	0.259	4.75935e-40	Tf regulatory cells	UBL3
GTF3C6	2.12036e-43	0.40447	0.436	0.301	4.15782e-39	Tf regulatory cells	GTF3C6
GNB1.1	1.57543e-34	0.404431	0.565	0.369	3.08926e-30	Tr1 cells	GNB1
PRKCB	1.64892e-290	0.404088	0.444	0.245	3.23337e-286	Tfh cells	PRKCB
LBR.1	5.6316e-34	0.403983	0.452	0.261	1.1043e-29	Tr1 cells	LBR
BSG	6.67117e-59	0.40396	0.566	0.28	1.30815e-54	Th1 cells	BSG
ZFP36.3	2.75258e-117	0.403956	0.946	0.833	5.39754e-113	Th17 cells	ZFP36
CHMP4A	2.55641e-53	0.403788	0.586	0.3	5.01286e-49	Th1 cells	CHMP4A
GSTO1	8.13032e-66	0.403762	0.479	0.207	1.59427e-61	Th1 cells	GSTO1
TENT5C.3	2.65048e-212	0.403653	0.583	0.362	5.19732e-208	Th2 cells	TENT5C
ZFYVE28.1	1.1273e-60	0.403637	0.253	0.084	2.21053e-56	Tr1 cells	ZFYVE28
CAPG	0	0.403499	0.215	0.043	0	Th2 cells	CAPG
ZNF791.1	4.25949e-27	0.403353	0.455	0.291	8.35244e-23	Tr1 cells	ZNF791
TIGIT.3	0	0.403067	0.209	0.06	0	Tfh cells	TIGIT
FAM129A	0	0.402968	0.163	0.038	0	Th2 cells	FAM129A
CREM.2	7.88653e-219	0.402843	0.913	0.818	1.54647e-214	Tfh cells	CREM
BIN2.1	6.42715e-40	0.402796	0.71	0.458	1.2603e-35	Th1 cells	BIN2
MAP1LC3B.1	3.13447e-39	0.402789	0.743	0.504	6.14638e-35	Th1 cells	MAP1LC3B
CCR7	0	0.402786	0.807	0.665	0	Naive CD4 T cells	CCR7
FAS.2	9.16561e-46	0.402585	0.301	0.127	1.79728e-41	Tr1 cells	FAS
TPP1.1	2.33523e-70	0.402494	0.269	0.086	4.57916e-66	Tr1 cells	TPP1
IGBP1.1	7.0195e-41	0.402335	0.705	0.454	1.37645e-36	Th1 cells	IGBP1
FBXO32	7.94343e-47	0.402096	0.312	0.13	1.55763e-42	Th1 cells	FBXO32
BTG2.5	1.59694e-33	0.40195	0.925	0.833	3.13143e-29	Tr1 cells	BTG2
CTSA.1	8.62352e-44	0.401904	0.256	0.14	1.69099e-39	Tf regulatory cells	CTSA
CD3D.1	1.13711e-54	0.401844	0.894	0.871	2.22975e-50	Tf regulatory cells	CD3D
HMGN1.1	4.14449e-24	0.401816	0.833	0.74	8.12693e-20	Tr1 cells	HMGN1
EIF4E2	7.84795e-81	0.401534	0.523	0.211	1.53891e-76	Th1 cells	EIF4E2
CDK2AP2.1	1.22118e-52	0.401388	0.412	0.186	2.39461e-48	Th1 cells	CDK2AP2
NDUFAB1	1.3797e-51	0.401316	0.623	0.343	2.70545e-47	Th1 cells	NDUFAB1
TPI1.3	1.85433e-49	0.40122	0.549	0.402	3.63615e-45	Tf regulatory cells	TPI1
TAGLN2.5	7.04709e-154	0.401007	0.938	0.795	1.38186e-149	Th17 cells	TAGLN2
CDK2AP2.2	1.31756e-31	0.400909	0.351	0.187	2.5836e-27	Tr1 cells	CDK2AP2
UQCRQ	1.00184e-40	0.400906	0.681	0.442	1.96451e-36	Th1 cells	UQCRQ
MAP2K2.1	2.75842e-27	0.400857	0.557	0.395	5.40899e-23	Tr1 cells	MAP2K2
SPATS2L.1	7.80845e-94	0.400802	0.209	0.047	1.53116e-89	Tr1 cells	SPATS2L
GADD45A.6	4.43114e-20	0.400599	0.592	0.432	8.68901e-16	Tr1 cells	GADD45A
HNRNPR.1	2.22342e-21	0.40059	0.627	0.495	4.35991e-17	Tr1 cells	HNRNPR
PAXX	1.18509e-148	0.400541	0.535	0.305	2.32383e-144	Th17 cells	PAXX
FKBP3	7.86167e-84	0.400498	0.439	0.161	1.54159e-79	Th1 cells	FKBP3
NRBP1	3.73682e-62	0.400384	0.531	0.245	7.32753e-58	Th1 cells	NRBP1
KIAA0232	7.40928e-92	0.400257	0.313	0.091	1.45289e-87	Th1 cells	KIAA0232
CSK.2	6.43726e-36	0.400228	0.403	0.22	1.26228e-31	Tr1 cells	CSK
FBXO34	2.7743e-34	0.399971	0.428	0.238	5.44013e-30	Tr1 cells	FBXO34
DDX46	7.05873e-38	0.399917	0.683	0.431	1.38415e-33	Th1 cells	DDX46
SRI	4.28535e-62	0.399608	0.535	0.246	8.40315e-58	Th1 cells	SRI
GPSM3	5.82066e-34	0.399579	0.879	0.756	1.14137e-29	Th1 cells	GPSM3
CSGALNACT1	1.50824e-49	0.399401	0.286	0.156	2.95751e-45	Tf regulatory cells	CSGALNACT1
NDUFB4	3.11895e-40	0.399198	0.769	0.553	6.11595e-36	Th1 cells	NDUFB4
RAP1A.1	1.96284e-25	0.399156	0.633	0.469	3.84893e-21	Tr1 cells	RAP1A
TRAPPC1.1	6.20694e-52	0.399071	0.491	0.337	1.21712e-47	Tf regulatory cells	TRAPPC1
ATP6V0D1	8.35296e-86	0.39878	0.455	0.167	1.63793e-81	Th1 cells	ATP6V0D1
PRRC2C	1.82654e-38	0.39874	0.938	0.824	3.58166e-34	Th1 cells	PRRC2C
ZC3H12A	3.46282e-35	0.398733	0.316	0.156	6.79024e-31	Tr1 cells	ZC3H12A
ARHGAP30.1	5.54718e-57	0.398689	0.508	0.241	1.08775e-52	Th1 cells	ARHGAP30
NDUFB5	1.68381e-52	0.398665	0.6	0.317	3.30177e-48	Th1 cells	NDUFB5
CNN2.1	2.19664e-208	0.398639	0.649	0.481	4.30739e-204	Tfh cells	CNN2
CCNDBP1	1.06604e-43	0.39857	0.442	0.303	2.09039e-39	Tf regulatory cells	CCNDBP1
FIS1	4.23654e-44	0.398382	0.739	0.459	8.30743e-40	Th1 cells	FIS1
INPP5D.2	5.71664e-36	0.398381	0.357	0.184	1.12098e-31	Tr1 cells	INPP5D
PSMD2	9.70669e-73	0.398361	0.47	0.195	1.90338e-68	Th1 cells	PSMD2
FAM102A.1	3.29199e-34	0.398335	0.592	0.354	6.45526e-30	Th1 cells	FAM102A
ATM.4	1.05208e-28	0.398173	0.722	0.507	2.06302e-24	Th1 cells	ATM
AGO2.1	1.30559e-26	0.398064	0.5	0.334	2.56013e-22	Tr1 cells	AGO2
RAB1B	7.2364e-127	0.398008	0.419	0.118	1.41899e-122	Th1 cells	RAB1B
NXPH4	0	0.397874	0.161	0.005	0	Tr1 cells	NXPH4
ZNRF2	2.49159e-69	0.397799	0.26	0.117	4.88576e-65	Tf regulatory cells	ZNRF2
NDUFA13	2.06172e-41	0.397739	0.612	0.357	4.04283e-37	Th1 cells	NDUFA13
BORCS5	1.44224e-28	0.397679	0.4	0.236	2.8281e-24	Tr1 cells	BORCS5
SRSF2.3	1.33111e-23	0.397567	0.888	0.818	2.61017e-19	Tr1 cells	SRSF2
SELPLG.2	1.40834e-30	0.397461	0.404	0.233	2.76161e-26	Tr1 cells	SELPLG
DHRS7.1	6.83672e-224	0.397442	0.418	0.218	1.34061e-219	Th2 cells	DHRS7
SMS	8.948e-49	0.397334	0.283	0.156	1.75461e-44	Tf regulatory cells	SMS
REEP5.2	2.42839e-235	0.397213	0.462	0.249	4.76183e-231	Th2 cells	REEP5
CCDC50.1	2.51135e-61	0.397193	0.267	0.091	4.9245e-57	Tr1 cells	CCDC50
CCDC12	1.7455e-42	0.39716	0.695	0.433	3.42275e-38	Th1 cells	CCDC12
MAP3K1.1	2.50472e-41	0.397093	0.366	0.236	4.91151e-37	Tf regulatory cells	MAP3K1
MAF1	9.3337e-51	0.397074	0.613	0.326	1.83024e-46	Th1 cells	MAF1
ATP5PB	5.02048e-39	0.396923	0.675	0.446	9.84466e-35	Th1 cells	ATP5PB
VMP1.1	1.26742e-239	0.396894	0.498	0.31	2.48528e-235	Tfh cells	VMP1
STMP1	7.27807e-61	0.396767	0.596	0.292	1.42716e-56	Th1 cells	STMP1
SMG1.1	8.97698e-46	0.396665	0.625	0.35	1.7603e-41	Th1 cells	SMG1
HNRNPC.1	2.01072e-27	0.396342	0.832	0.758	3.94283e-23	Tr1 cells	HNRNPC
ERN1	9.86593e-296	0.396202	0.306	0.119	1.93461e-291	Th2 cells	ERN1
LAMTOR5	4.10658e-47	0.396123	0.712	0.44	8.05259e-43	Th1 cells	LAMTOR5
RASGRP1.1	8.48206e-22	0.396114	0.585	0.434	1.66325e-17	Tr1 cells	RASGRP1
NEAT1.3	3.87549e-20	0.396006	0.294	0.247	7.59946e-16	Th2 cells	NEAT1
CCM2.1	4.76407e-41	0.395924	0.56	0.309	9.34186e-37	Th1 cells	CCM2
ELOVL5.4	5.26987e-34	0.395853	0.433	0.247	1.03337e-29	Tr1 cells	ELOVL5
ITGA6	6.03612e-225	0.395711	0.339	0.215	1.18362e-220	Naive CD4 T cells	ITGA6
DUSP2.2	1.35297e-199	0.395226	0.706	0.529	2.65305e-195	Tfh cells	DUSP2
SUMO2	3.5243e-71	0.395154	0.902	0.857	6.91079e-67	Tf regulatory cells	SUMO2
SOD1.1	3.32097e-32	0.395038	0.885	0.828	6.51209e-28	Tr1 cells	SOD1
RNF168.4	3.05675e-27	0.395015	0.472	0.303	5.99398e-23	Tr1 cells	RNF168
GLUD1	2.04756e-40	0.39501	0.337	0.213	4.01506e-36	Tf regulatory cells	GLUD1
LIMS1.5	1.18314e-36	0.394998	0.379	0.25	2.32003e-32	Tf regulatory cells	LIMS1
DDIT4.1	8.25951e-86	0.394806	0.55	0.467	1.61961e-81	Activated CD4 T cells	DDIT4
ETS1.2	1.84796e-40	0.394749	0.763	0.695	3.62367e-36	Tf regulatory cells	ETS1
STARD7	1.26954e-24	0.394635	0.355	0.212	2.48945e-20	Tr1 cells	STARD7
ARF6.1	1.06424e-25	0.394604	0.685	0.541	2.08687e-21	Tr1 cells	ARF6
GAPDH.3	8.44949e-300	0.394482	0.953	0.859	1.65686e-295	Tfh cells	GAPDH
MAF.4	5.736e-226	0.394459	0.395	0.194	1.12477e-221	Th2 cells	MAF
PRDX6.2	7.68538e-26	0.39416	0.667	0.519	1.50703e-21	Tr1 cells	PRDX6
OGA	9.01344e-47	0.394154	0.59	0.318	1.76745e-42	Th1 cells	OGA
ZFP36.1	2.2233e-226	0.394017	0.925	0.822	4.35966e-222	Tfh cells	ZFP36
SFT2D1.1	9.75714e-73	0.393779	0.445	0.177	1.91328e-68	Th1 cells	SFT2D1
MRPL28	4.16581e-101	0.393643	0.394	0.124	8.16873e-97	Th1 cells	MRPL28
ECH1.2	1.37173e-33	0.393638	0.444	0.259	2.68983e-29	Tr1 cells	ECH1
TSG101	9.9639e-67	0.393563	0.466	0.194	1.95382e-62	Th1 cells	TSG101
TIFA	1.21849e-54	0.393482	0.22	0.102	2.38933e-50	Tf regulatory cells	TIFA
WNK1	1.35799e-38	0.39343	0.452	0.322	2.66289e-34	Tf regulatory cells	WNK1
ZBTB32.1	0	0.393042	0.169	0.01	0	Tr1 cells	ZBTB32
CDC42EP3.3	2.46712e-38	0.393019	0.289	0.13	4.83778e-34	Tr1 cells	CDC42EP3
ESYT1	8.27239e-104	0.392954	0.375	0.112	1.62213e-99	Th1 cells	ESYT1
POLR2J	8.5968e-50	0.392842	0.603	0.32	1.68575e-45	Th1 cells	POLR2J
SNU13.3	1.70291e-30	0.392779	0.836	0.716	3.33924e-26	Tr1 cells	SNU13
ARHGAP15.1	1.45437e-110	0.392734	0.645	0.446	2.85188e-106	Th17 cells	ARHGAP15
BUD31.1	9.61119e-26	0.392483	0.62	0.467	1.88466e-21	Tr1 cells	BUD31
GFOD1	0	0.39205	0.208	0.01	0	Th1 cells	GFOD1
TMEM258.1	1.01606e-25	0.391969	0.701	0.573	1.9924e-21	Tr1 cells	TMEM258
SLA2.1	5.85982e-93	0.391833	0.236	0.057	1.14905e-88	Tr1 cells	SLA2
ENSA	4.91541e-40	0.391832	0.714	0.458	9.63862e-36	Th1 cells	ENSA
RBBP7	3.06713e-58	0.391824	0.517	0.239	6.01433e-54	Th1 cells	RBBP7
MYL12B.1	1.44855e-237	0.391738	0.944	0.849	2.84046e-233	Th2 cells	MYL12B
SP110	2.20717e-41	0.391733	0.614	0.358	4.32803e-37	Th1 cells	SP110
TLE5.1	4.95172e-12	0.391678	0.665	0.66	9.70983e-08	Th1 cells	TLE5
LAIR2	2.55973e-74	0.391501	0.206	0.059	5.01938e-70	T regulatory cells	LAIR2
TRIM38	3.94034e-44	0.391472	0.506	0.26	7.72661e-40	Th1 cells	TRIM38
ARPC5.2	2.46866e-25	0.391449	0.556	0.408	4.8408e-21	Tr1 cells	ARPC5
RNF166.1	3.43712e-192	0.391295	0.464	0.269	6.73986e-188	Th2 cells	RNF166
LDHA.3	2.6816e-29	0.391272	0.923	0.798	5.25835e-25	Th1 cells	LDHA
ADAM19	0	0.391238	0.225	0.053	0	Th2 cells	ADAM19
TAGLN2.8	3.03226e-28	0.391229	0.892	0.803	5.94596e-24	Tr1 cells	TAGLN2
FBXO7	5.57759e-51	0.391186	0.564	0.29	1.09371e-46	Th1 cells	FBXO7
DUSP1.2	2.52316e-108	0.391051	0.891	0.779	4.94767e-104	Th2 cells	DUSP1
MCM5	2.01552e-144	0.391043	0.257	0.048	3.95223e-140	Th1 cells	MCM5
CXCR4.4	7.05786e-38	0.391012	0.977	0.906	1.38398e-33	Th1 cells	CXCR4
CERK.1	9.60802e-35	0.390942	0.359	0.186	1.88404e-30	Tr1 cells	CERK
RABAC1.1	1.71974e-181	0.390758	0.64	0.444	3.37224e-177	Th2 cells	RABAC1
HACD4	3.2779e-85	0.390657	0.366	0.12	6.42764e-81	Th1 cells	HACD4
HLA-DMA.2	7.81163e-95	0.390569	0.209	0.046	1.53178e-90	Tr1 cells	HLA-DMA
CARD8	6.30887e-62	0.390515	0.482	0.212	1.23711e-57	Th1 cells	CARD8
SIRT2	1.7916e-102	0.390179	0.362	0.107	3.51314e-98	Th1 cells	SIRT2
RASSF5	3.62232e-49	0.390161	0.577	0.301	7.10301e-45	Th1 cells	RASSF5
HNRNPK	1.26039e-44	0.389811	0.918	0.772	2.4715e-40	Th1 cells	HNRNPK
B3GNT2	9.1412e-82	0.389798	0.388	0.136	1.7925e-77	Th1 cells	B3GNT2
PPP1R15A.1	3.09308e-166	0.389659	0.829	0.766	6.06523e-162	Activated CD4 T cells	PPP1R15A
ID1.1	1.63076e-207	0.389604	0.194	0.08	3.19775e-203	Tfh cells	ID1
TMEM248	3.7116e-29	0.389516	0.455	0.277	7.27807e-25	Tr1 cells	TMEM248
PIN1.1	1.1235e-57	0.389471	0.531	0.251	2.20308e-53	Th1 cells	PIN1
PDIA3	2.4335e-165	0.389468	0.73	0.569	4.77185e-161	Th2 cells	PDIA3
DNPH1.1	1.70067e-65	0.389378	0.429	0.176	3.33484e-61	Th1 cells	DNPH1
TPI1.2	1.17781e-127	0.389258	0.614	0.392	2.30956e-123	Th17 cells	TPI1
UBE2A.1	3.2402e-27	0.389219	0.427	0.265	6.3537e-23	Tr1 cells	UBE2A
SUPT5H	1.77819e-29	0.389044	0.425	0.252	3.48685e-25	Tr1 cells	SUPT5H
SF3B2	1.75654e-38	0.389021	0.719	0.466	3.44441e-34	Th1 cells	SF3B2
TAP1.2	3.55346e-32	0.388991	0.4	0.229	6.96799e-28	Tr1 cells	TAP1
FOXP1	1.93176e-28	0.388907	0.865	0.803	3.78799e-24	T regulatory cells	FOXP1
EVI2B.3	5.61232e-31	0.388649	0.545	0.44	1.10052e-26	Tf regulatory cells	EVI2B
CHST11.3	1.15306e-30	0.388612	0.305	0.155	2.26103e-26	Tr1 cells	CHST11
PTGER2.1	1.14378e-263	0.388412	0.23	0.062	2.24285e-259	Th17 cells	PTGER2
SETD7.1	2.74182e-125	0.388348	0.195	0.053	5.37643e-121	Tf regulatory cells	SETD7
ZAP70.1	5.38531e-32	0.388338	0.408	0.233	1.05601e-27	Tr1 cells	ZAP70
LGMN	2.74767e-66	0.388067	0.131	0.027	5.38791e-62	Tr1 cells	LGMN
WASF2.1	2.8757e-41	0.388047	0.721	0.46	5.63897e-37	Th1 cells	WASF2
TNFRSF9	0	0.387871	0.1	0.004	0	Tf regulatory cells	TNFRSF9
CTSS	5.12882e-41	0.387855	0.465	0.336	1.00571e-36	Tf regulatory cells	CTSS
REL.3	3.39633e-33	0.387848	0.702	0.603	6.65987e-29	Tf regulatory cells	REL
PRKAR1A.1	2.75836e-26	0.387782	0.453	0.291	5.40886e-22	Tr1 cells	PRKAR1A
STX11.1	8.29475e-57	0.387742	0.269	0.134	1.62652e-52	Tf regulatory cells	STX11
CAST.6	3.56789e-24	0.386852	0.679	0.513	6.99628e-20	Tr1 cells	CAST
MRPS6.1	5.93242e-28	0.386841	0.385	0.223	1.16329e-23	Tr1 cells	MRPS6
LDHB	6.46173e-53	0.386725	0.403	0.272	1.26708e-48	Th17 cells	LDHB
WSB2	9.2225e-75	0.386676	0.232	0.065	1.80844e-70	Tr1 cells	WSB2
GRAMD1B	8.69186e-85	0.38645	0.213	0.052	1.70439e-80	Tr1 cells	GRAMD1B
HLA-DMA	2.11021e-124	0.385907	0.174	0.044	4.13791e-120	Tf regulatory cells	HLA-DMA
RTRAF	2.78387e-40	0.3859	0.803	0.605	5.45889e-36	Th1 cells	RTRAF
HP1BP3	6.01117e-35	0.385773	0.731	0.472	1.17873e-30	Th1 cells	HP1BP3
GBP1	3.45378e-36	0.385659	0.219	0.118	6.77252e-32	Tf regulatory cells	GBP1
AKIRIN1	5.06942e-23	0.385645	0.612	0.469	9.94062e-19	Tr1 cells	AKIRIN1
ADAM19.1	0	0.385427	0.245	0.06	0	Th17 cells	ADAM19
MAGEH1	2.94873e-19	0.385358	0.285	0.181	5.78217e-15	T regulatory cells	MAGEH1
KANSL1	1.75853e-39	0.385332	0.634	0.372	3.44831e-35	Th1 cells	KANSL1
SERINC3	8.83155e-48	0.385297	0.569	0.294	1.73178e-43	Th1 cells	SERINC3
ARL6IP1	1.14764e-36	0.385256	0.613	0.369	2.25041e-32	Th1 cells	ARL6IP1
MRPS15	1.88988e-62	0.385174	0.582	0.28	3.70586e-58	Th1 cells	MRPS15
SDHA	7.71595e-66	0.385059	0.431	0.176	1.51302e-61	Th1 cells	SDHA
SYNE1.1	3.13778e-34	0.385049	0.368	0.194	6.15287e-30	Tr1 cells	SYNE1
POLB	3.96484e-48	0.384965	0.245	0.091	7.77465e-44	Tr1 cells	POLB
NAPG	3.22293e-41	0.384835	0.34	0.161	6.31984e-37	Tr1 cells	NAPG
[truncated: 3,734 more rows]
